# Supplementary material for: Compliance with ethical standards in the reporting of donor sources and ethics review in peer-reviewed publications involving organ transplantation in China: a scoping review
Source: PubMed Central journal article supplement — BMJ Open. 2019 Feb 5;9(2):e024473. doi: 10.1136/bmjopen-2018-024473 (PMC6377532; doi:10.1136/bmjopen-2018-024473), 2019-02-05
Supplement: bmjopen-2018-024473.draft_revisions.pdf [file bmjopen-2018-024473.draft_revisions.pdf]

# BMJ Open

BMJ Open is committed to open peer review. As part of this commitment we make the peer review history of every article we publish publicly available.

When an article is published we post the peer reviewers' comments and the authors' responses online. We also post the versions of the paper that were used during peer review. These are the versions that the peer review comments apply to.

The versions of the paper that follow are the versions that were submitted during the peer review process. They are not the versions of record or the final published versions. They should not be cited or distributed as the published version of this manuscript.

BMJ Open is an open access journal and the full, final, typeset and author-corrected version of record of the manuscript is available on our site with no access controls, subscription charges or pay-per-view fees (<http://bmjopen.bmj.com>).

If you have any questions on BMJ Open's open peer review process please email [editorial.bmjopen@bmj.com](mailto:editorial.bmjopen@bmj.com)

# BMJ Open

## Compliance with ethical standards in the reporting of donor sources and ethics review in peer-reviewed publications involving organ transplantation in China: A scoping review

|                               |                                                                                                                                                                                                                                                                                                                                                                                                                                                                                             |
|-------------------------------|---------------------------------------------------------------------------------------------------------------------------------------------------------------------------------------------------------------------------------------------------------------------------------------------------------------------------------------------------------------------------------------------------------------------------------------------------------------------------------------------|
| Journal:                      | <i>BMJ Open</i>                                                                                                                                                                                                                                                                                                                                                                                                                                                                             |
| Manuscript ID                 | bmjopen-2018-024473                                                                                                                                                                                                                                                                                                                                                                                                                                                                         |
| Article Type:                 | Research                                                                                                                                                                                                                                                                                                                                                                                                                                                                                    |
| Date Submitted by the Author: | 30-May-2018                                                                                                                                                                                                                                                                                                                                                                                                                                                                                 |
| Complete List of Authors:     | Rogers, Wendy; Macquarie University, Clinical Medicine<br>Robertson, Matthew; Human Rights Law Foundation, Human Rights Law Foundation<br>Ballantyne, Angela; University of Otago,<br>Blakely, Brette; Macquarie University, Australian Institute of Health Innovation<br>Catsanos, Ruby; No institutional affiliation<br>Clay-Williams, Robyn; Macquarie University, Australian Institute of Health Innovation<br>Fiatarone Singh, Maria; University of Sydney, Faculty of Health Sciences |
| Keywords:                     | organ donation, China, publication ethics, scoping review, executed prisoners                                                                                                                                                                                                                                                                                                                                                                                                               |
|                               |                                                                                                                                                                                                                                                                                                                                                                                                                                                                                             |

SCHOLARONE™  
Manuscripts

1  
2  
3 **Compliance with ethical standards in the reporting of donor sources and ethics review**  
4 **in peer-reviewed publications involving organ transplantation in China: A scoping**  
5 **review**  
6  
7  
8  
9

10  
11 Wendy Rogers (corresponding author), Department of Clinical Medicine and Department of  
12  
13 Philosophy, Macquarie University, Sydney, Australia.

14  
15  
16 [Wendy.rogers@mq.edu.au](mailto:Wendy.rogers@mq.edu.au)

17  
18 Department of Philosophy, Macquarie University, NSW 2109, Australia

19  
20 +61 2 9850 8858  
21  
22

23  
24 Matthew Robertson, Human Rights Law Foundation, New York. [mprob7@gmail.com](mailto:mprob7@gmail.com)  
25  
26

27  
28 Angela Ballantyne, Department of Primary Health Care & General Practice, University of  
29  
30 Otago, Wellington, New Zealand. [angela.ballantyne@otago.ac.nz](mailto:angela.ballantyne@otago.ac.nz)  
31  
32

33  
34  
35 Brette Blakely, Australian Institute of Health Innovation, Macquarie University, Sydney,  
36  
37 Australia. [Brette.blakely@mq.edu.au](mailto:Brette.blakely@mq.edu.au)  
38  
39

40  
41 Ruby Catsanos, No institutional affiliation, Sydney, Australia.  
42

43  
44 [rbycatsanos@gmail.com](mailto:rbycatsanos@gmail.com)  
45  
46

47  
48 Robyn Clay-Williams, Australian Institute of Health Innovation, Macquarie University,  
49  
50 Sydney, Australia. [robyn.clay-williams@mq.edu.au](mailto:robyn.clay-williams@mq.edu.au)  
51  
52  
53  
54  
55  
56  
57  
58  
59  
60

1  
2  
3 Maria Fiatarone Singh, Faculty of Health Sciences, University of Sydney, Australia.  
4

5 [maria.fiataronesingh@sydney.edu.au](mailto:maria.fiataronesingh@sydney.edu.au)  
6  
7  
8  
9  
10

11 **Key words**  
12

13 Organ donation, China, Publication ethics, scoping review, executed  
14

15 prisoners  
16  
17  
18  
19

20 **Word count**  
21

22 3936 excluding tables and references  
23  
24  
25  
26  
27  
28  
29  
30  
31  
32  
33  
34  
35  
36  
37  
38  
39  
40  
41  
42  
43  
44  
45  
46  
47  
48  
49  
50  
51  
52  
53  
54  
55  
56  
57  
58  
59  
60

## Abstract

### Introduction

Transplantation of organs procured from executed prisoners is widely condemned, together with presentation and publication of research that involves organs transplanted from executed prisoners. Explicit policy published by The Transplantation Society seeks to exclude research that: (1) involves any biological material from executed prisoners; (2) lacks Institutional Review Board approval; and (3) lacks consent of donors.

The objective of this study is to investigate whether papers reporting research on Chinese transplant recipients comply with this professional standard aimed at excluding publication of research involving prisoners' organs.

### Methods

The study design is a scoping review. Inclusion criteria were research papers published in peer-reviewed English language journals reporting on outcomes of research involving recipients of transplanted hearts, livers or lungs in mainland China. Medline, Scopus and Embase were searched from Jan 2000 to April 2017.

### Results

445 included studies reported on outcomes of 85,477 transplants. Of these, 324 (73%) reported approval from an IRB; 33 (7%) stated explicitly that transplanted organs were not procured from executed prisoners; and 6 (1%) reported that donors gave consent for transplantation. Of the papers claiming that no prisoners' organs were involved in the transplants, 18 of them involved 2,641 transplants that took place prior to 2010, when there was no volunteer donor program in China.

### Discussion

The transplant community has failed to implement ethical standards banning publication of research using material from executed prisoners. As a result, a large body of unethical research now exists, raising questions of complicity to the extent that the transplant community uses and benefits from the results of this research.

### Strengths and weaknesses of this study

- The study's main strengths lie in its originality and in the use of robust scoping review methods.
- The use of these methods gives confidence that the results are reliable.
- However, scoping review methods are less rigorous than systematic reviews and it is possible that some relevant papers were not included.
- This study was limited by poor quality of data in the included studies. It is possible that a small number of liver transplants classified as deceased donor were from living donors.
- The total number of participants (and hence number of transplants) in the included studies is inflated by multiple publication of the same and overlapping research cohorts.

## Article Summary

- Prior to 2015, China sourced the majority of organs for transplant from executed prisoners, including prisoners of conscience.
  - There is international consensus amongst health and human rights agencies, The Transplantation Society and some transplant journals that this practice is unacceptable and transplant research using organs procured from prisoners should not be published.
  - This scoping study investigates the effects of this policy prohibition.
  - 412 of 445 (92.5%) Chinese transplant research papers in this study fail to report whether or not organs were sourced from prisoners.
  - The majority of the published research reports on transplants that occurred when there was no or very limited access to volunteer donors in China.
- Reviewers, editors and journals have failed to implement ethical policy on transplant research, leading to publication of a large body of unethical research.

ew only

## Introduction

The transplantation of organs procured from executed prisoners is widely condemned by bodies including the World Health Organisation,[1] the World Medical Association,[2] The Transplantation Society,[3] Amnesty International and the Declaration of Istanbul.[4,5] This condemnation extends to undertaking research and presenting results that involve the use of organs obtained from executed prisoners.[4] In 2006, The Transplantation Society (TTS) explicitly stated that it would not accept conference papers based on research involving organs sourced from executed prisoners.[6,7] The 2006 policy statement by TTS was followed by calls for a boycott on accepting conference papers or publishing journal articles based on research involving organs from executed prisoners.[8–10] Some journals explicitly adopted this ban as policy (*Journal of Clinical Investigation*,[11] *American Journal of Transplantation* and the *Journal of Heart and Lung Transplantation*).[9]

Together, these statements by international bodies, professional societies, academics and journals constitute explicit ethical standards prohibiting the publication or presentation of research involving organs from executed prisoners. These standards are primarily directed towards peer-reviewers, editors and publishers. However, these standards lack regulatory force; there are no sanctions for breaches, and to date there has been no audit investigating compliance.

This study is the first attempt to track the progress of the transplant community in meeting this ethical injunction to avoid engaging with research involving the use of executed prisoners' organs.

The prohibition against the use of executed prisoners' organs is explicitly directed towards China, which is one of the few countries where the use of prisoners' organs has been government-sanctioned. In 2001, a Chinese official dismissed as “sensational lies” reports of organ harvesting from executed prisoners, claiming that the major source of organs was



1  
2  
3 voluntary donations.[12] This rhetoric changed in 2006 when Chinese officials first openly  
4 acknowledged that the majority of transplanted organs were sourced from executed  
5 prisoners.[13,14] In 2007, China claimed it would reduce reliance on executed prisoners,[15]  
6  
7 but in a 2015 interview, Huang Jiefu, China's most senior transplant official, stated that there  
8 had been just 120 cases of volunteer donors up to 2009.[16] In 2014 Huang committed China  
9 to using only organs from volunteer donors from 1 January 2015.[17] However, the use of  
10 prisoners' organs remains technically legal today in China if "consent" is obtained,[18] and in  
11 2017 Chinese officials admitted that it is not possible to verify that all organ harvesting from  
12 prisoners has ceased.[19]

21  
22 Use of organs from executed prisoners is widely condemned because the coercive situation of  
23 being on death row undermines the possibility of ethically valid consent, or consent may not  
24 be sought at all.[20] In addition, in China there have been extensive and credible reports of  
25 non-voluntary organ harvesting from prisoners of conscience, adding to ethical  
26 concern.[21,22]

31  
32  
33 The transplant community recognises that the most effective way to express their  
34 condemnation of Chinese organ procurement practices is through boycott, leading to formal  
35 TTS policy and recommendations for banning unethical research as described above.

36  
37  
38  
39 Publication in international, peer-reviewed journals is a marker of academic success and  
40 international acceptance. Imposing a ban sends a strong message of disapprobation to  
41 researchers whose projects involve transplants of organs from executed prisoners.

42  
43  
44  
45  
46 The current approach to this issue taken by TTS and some journals is incremental rather than  
47 absolutist.[10] An 'absolutist' approach would ban publication of all Chinese transplant data  
48 until there is compelling positive evidence that the use of executed prisoners' organs has  
49 ceased. This would require free and full on-site inspections of Chinese transplant hospitals,  
50 including unfettered access to hospital information systems. China has not agreed to such  
51  
52  
53  
54  
55  
56  
57  
58  
59  
60

1  
2  
3 inspections and no international or professional body has assumed responsibility for pursuing  
4  
5 this issue. Instead, the professions' preferred incremental approach requires assessment of  
6  
7 Chinese studies for ethical acceptability prior to publication, with exclusion of any that  
8  
9 include data from executed prisoners. The incremental policy therefore requires peer-  
10  
11 reviewers and journal editors to ask consistently whether the research: (1) involved any  
12  
13 biological material from executed prisoners; (2) received Institutional Review Board (IRB)  
14  
15 (Research Ethics Committee) approval; and (3) required consent of donors. For transparency  
16  
17 purposes this information should be included in the final publication. Transparency  
18  
19 contributes to a culture of accountability and ensures that readers are not unwittingly  
20  
21 absorbing and using unethically obtained data. The burden of proof should rest with  
22  
23 authors/researchers to supply evidence of consent to donation, and approval by an IRB, and  
24  
25 attest that their study does not use material derived from executed prisoners.  
26  
27

28  
29 In this study, we investigated the extent to which journals have complied with these ethical  
30  
31 standards by: 1) excluding any research using organs from executed prisoners; 2) requiring a  
32  
33 statement of IRB approval; and 3) providing a statement that consent was obtained from  
34  
35 donors. As noted above, 'consent' obtained from executed prisoners does not meet  
36  
37 international ethical standards.  
38

### 39 **Methods**

40  
41 This research used scoping review methodology. Scoping reviews can be used to map an area  
42  
43 of research, summarise existing evidence or identify gaps in the literature. Unlike systematic  
44  
45 reviews, scoping reviews usually do not assess the quality of the included studies.[23] This  
46  
47 review followed the five steps articulated by Arksey and O'Mallee to ensure rigour,  
48  
49 transparency and facilitate replication (see Table 1).[24]  
50  
51  
52  
53  
54  
55  
56  
57  
58  
59  
60

Table 1: Arksey and O'Mallee's methodological framework for a scoping review

| Framework stage | Description                                      |
|-----------------|--------------------------------------------------|
| Stage 1         | Identifying the research question                |
| Stage 2         | Identifying relevant studies                     |
| Stage 3         | Study selection                                  |
| Stage 4         | Charting the data                                |
| Stage 5         | Collating, summarising and reporting the results |

The research question was identified and refined through discussion amongst the authors and expert colleagues. The final version was: "To what extent do papers reporting research on Chinese transplant recipients identify the donors of organs, types of donation, and compliance with ethical requirements for human research and organ donation as per international guidelines and professional standards?"

#### *Search Strategy*

Relevant studies in English language journals were identified through searching online databases. The electronic search strategies were developed, tested and refined with the assistance of an expert librarian. The search aimed to identify full text papers published in English in peer-reviewed journals by authors based at Chinese institutions that reported on research involving recipients of solid organ transplants. The search strategies for Medline, Scopus and Embase are in Supplementary File 1. The inclusionary criteria were organ transplantation/transplant (title, abstract) and China (institution/affiliation). The exclusionary criteria were stem cells (title, abstract); mice (title, abstract); living donors (title, abstract); case reports/letters/editorials (document type). The searches were limited to English language and humans, and the years were 2000-current. The start date of 2000 was selected as this is when numbers of transplantations and associated research papers rapidly increased in China.

1  
2  
3 Medline, Scopus and Embase were searched on 5 April 2017 by WR, BB and RCW. All  
4 relevant searches were downloaded into an EndNote library by WR. Duplicates were  
5 removed by EndNote filter. We did not identify further papers from other sources or search  
6 the references of included papers as we aimed to capture papers that are readily available  
7 through mainstream databases, and this was a scoping rather than systematic review. Our  
8 rationale for this approach was that although our search strategy might potentially miss some  
9 papers published in difficult to find journals as well as those not in English, this potential  
10 reduction in sensitivity would simply provide a conservative estimate of the magnitude of  
11 ethical breaches of publication standards. Notably, a conservative estimate of the volume of  
12 problematic publications, if substantial, would lend further support to the pervasiveness and  
13 importance of any problems identified.

14  
15  
16  
17  
18  
19  
20  
21  
22  
23  
24  
25  
26  
27  
28  
29  
30  
31  
32  
33  
34  
35  
36  
37  
38  
39  
40  
41  
42  
43  
44  
45  
46  
47  
48  
49  
50  
51  
52  
53  
54  
55  
56  
57  
58  
59  
60  
The title and abstracts remaining after removal of duplicates were screened for obvious  
exclusionary factors, with each author screening an equal number. All authors were trained in  
the use of the exclusionary criteria by screening the same 100 abstracts and titles. At the end  
of the pilot process, the exclusionary criteria were refined following discussion. The final  
exclusionary criteria for title and abstract screening were:

- transplants other than solid organs;
- transplants not occurring in mainland China;
- clinical case reports and/or incidental inclusion of data from Chinese transplant recipients;
- meta-analyses and systematic reviews;
- animal research;
- English-language journals published in China.

Articles which could not be eliminated by title and abstract were reviewed as full text articles  
to determine eligibility. Prior to full text review, five of the authors (WR, MPR, RC, BB,

RCW) undertook further training and benchmarking in use of the exclusionary criteria on full text papers. This involved all five screening the same 20 papers, followed by discussion. The exclusionary criteria were finalised after this process (see Table 2), and four authors (RC, WR, MPR, BB) assessed full text articles for eligibility.

Table 2: Exclusion criteria for full text review of papers

|                                                                                                                        |
|------------------------------------------------------------------------------------------------------------------------|
| “Animal Research” – Exclude any non-human research                                                                     |
| “Chinese Journal” – Exclude any papers published in (English language) journals published in China                     |
| “Case Report” – Exclude papers reporting on clinical case reports                                                      |
| “Incidental Inclusion” – Exclude papers where transplant recipients are incidentally included as research participants |
| “Kidneys” – Exclude any papers reporting data from kidney transplant recipients                                        |
| “Living Donors” – Exclude papers where all the transplanted organs were procured from living donors                    |
| “Not China” – Exclude any papers where the transplants took place outside mainland China                               |
| “Not Reviewed” – Exclude any non peer reviewed publications (including commentaries, letter to editors etc.)           |
| “Other Organs” – Exclude other tissue or organs i.e., not livers, hearts or lungs                                      |
| “Other” – State reason                                                                                                 |
| “Review Paper” – Exclude review papers (meta-analysis, systematic reviews etc.)                                        |

Papers reporting on recipients of kidney transplants were excluded at the full text review stage due to lack of information as to whether donors were deceased or living. As a key question in our research concerned procurement of organs from executed prisoners, we did

1  
2  
3 not want to include a potentially large number of papers in which it was unclear whether or  
4  
5 not organs were procured from living donors. The reasons for exclusion were recorded, but  
6  
7 where more than one reason was present, only the first reason noted by the data extractor is  
8  
9 recorded.

10  
11 The same four authors who determined eligibility of full text papers also extracted data from  
12  
13 these papers onto pre-tested forms (see Supplementary File 2 for details extracted). Any  
14  
15 details that could not be extracted with certainty were discussed by the group of authors to  
16  
17 reach a consensus. No data extraction outcomes were unable to be resolved using this  
18  
19 method. Data from 10% of included papers were checked by a second author.

20  
21  
22 This process is summarised in a PRISMA diagram (Figure 1).

23  
24 *(Insert Figure 1 around here)*  
25  
26  
27

### 28 *Patient and Public Involvement*

29  
30  
31 There was no patient or public involvement in this scoping review of published literature.  
32  
33  
34

### 35 **Results**

36  
37 The searches identified 6723 records, leaving 4168 after duplicates were removed. After  
38  
39 screening of abstracts and titles, 2489 records were excluded. 1679 full text articles were  
40  
41 screened for eligibility. 1229 were excluded (see Table 3). 445 papers were included in the  
42  
43 final data set (see Supplementary File 3), and 5 papers were unavailable.[25–29]  
44  
45  
46  
47  
48  
49  
50  
51  
52  
53  
54  
55  
56  
57  
58  
59  
60

Table 3: Reasons for exclusions of full text papers (n=1229)

| Reason               | Number |
|----------------------|--------|
| Animal Research      | 12     |
| Chinese Journal      | 96     |
| Case Report          | 3      |
| Incidental Inclusion | 14     |
| Kidneys              | 637    |
| Living Donors        | 7      |
| Not China            | 380    |
| Not Reviewed         | 1      |
| Other Organs         | 2      |
| Other                | 49     |
| Review Paper         | 28     |

The main results are summarised in Table 4. See Supplementary File 4 for detailed table of results.

Table 4: Results summary table

| Variable                                                                                                                  | Number (%)    |
|---------------------------------------------------------------------------------------------------------------------------|---------------|
| Total number of included papers                                                                                           | 445 (100%)    |
| Total number of transplants reported                                                                                      | 85,477        |
| Median number of transplants per paper (range)                                                                            | 72 (1-20,524) |
| Number of papers that explicitly stated organs (hearts, livers, lungs) were from deceased donors                          | 173 (39%)     |
| Number of papers reporting research ethics approval                                                                       | 324 (73%)     |
| Number of papers with any information on the identity of the donors                                                       | 63 (14%)      |
| Number of papers with explicit statement that no organs from prisoners were used                                          | 33 (7%)       |
| Number of papers that reported consent for donation (including those that also stated no organs from prisoners were used) | 12 (3%)       |
| Number of papers with any statement about the type of donation (after brain death, after cardiac death)                   | 64 (14%)      |

Overall, 324 (73%) of the 445 papers included a statement regarding approval from an institutional or regional ethics committee. Most of these statements were of a general type such as: “The study protocol was conducted in accordance with the standards of the Declaration of Helsinki and current ethical guidelines”[30]; “All protocols were approved by the ethics committee of the institution before the study began, and the protocols conformed to the ethical guidelines of the 1975 Helsinki Declaration”[31] and “The present study was



1  
2  
3 approved by the ethics committee of Qingdao University (Qingdao, China)".[32] Few  
4  
5 contained an IRB reference number or the date approval was granted. The majority of these  
6  
7 statements reported that research participants (who were the transplant *recipients*) had given  
8  
9 their informed consent.

10  
11 The graph in Figure 2 shows ethics approvals by year. These increased substantially after  
12  
13 2006, which was the year that The Transplantation Society published its policy banning  
14  
15 conference papers based on data from executed prisoners.[7]

16  
17  
18 *(Insert Figure 2 around here)*

19  
20  
21 Only 63 papers (14%; see Supplementary File 5) included any information about the source  
22  
23 of the organs (i.e., whether or not the organs came from executed prisoners or volunteers or if  
24  
25 consent was given). This category was called "donor identity" in our data extraction sheet,  
26  
27 and was interpreted inclusively. For example, papers reporting that donors gave informed  
28  
29 consent were included here even if there was no explicit statement that the donors were not  
30  
31 prisoners. Under Chinese policy, prisoners are permitted to make allegedly voluntary  
32  
33 donations.[33] The presence or absence of donor identity statements by year is in Figure 3.

34  
35  
36 Only one paper published prior to 2007 included any information about donor identity.[34]

37  
38  
39 *(Insert Figure 3 around here)*

40  
41  
42  
43 Among the 63 papers that provided any information about the donors, 33 (only 7.4% of all  
44  
45 included studies) stated explicitly that no organs from executed prisoners were used in the  
46  
47 transplantations.[30,31,34–65] Five of these also stated explicitly that organs were sourced  
48  
49 from volunteers.[35,39,46,48,61] Three of the 33 reported that informed consent was  
50  
51 obtained from donors or their families, and these three papers also included a statement about  
52  
53 ethics review. [30,47,61] That is, less than one per cent of included studies contain all three  
54  
55 pieces of information mandated by TTS.  
56  
57

1  
2  
3 However, the claims that organs were not procured from prisoners cannot be true in many of  
4 these 33 papers. According to Chinese reports, there were only 120 voluntary donors in the  
5 whole of China up until to 2009[16], and donation numbers were low during the nascent  
6 volunteer donor program from 2010-2014 (see Table 5).[66]  
7  
8  
9  
10

11  
12 Table 5: Numbers of volunteer organ donors in China 2000-2014  
13

| Year       | Number of volunteer donations according to Chinese sources |
|------------|------------------------------------------------------------|
| Up to 2009 | 120 [16]                                                   |
| 2010       | 34 [66]                                                    |
| 2011       | 132 [66]                                                   |
| 2012       | 433 [66]                                                   |
| 2013       | 849 [66]                                                   |
| 2014       | 1702 [66]                                                  |

14  
15  
16  
17  
18  
19  
20  
21  
22  
23  
24  
25  
26  
27  
28  
29  
30  
31  
32  
33  
34  
35  
36  
37  
38  
39 Yet 18 of the 33 papers claiming that organs were not procured from executed prisoners  
40 reported on 2,641 transplants that took place prior to 2010.[34,38,40,41,44–  
41 51,53,54,58,63,67][35,39,46,48,61],[34,38,40,41,44–51,53,54,58,63,67]. 8 of the 33 papers  
42 report on 1,212 transplants that occurred both before and after 2010  
43 [30,31,35,39,43,52,59,62]; and 6 of them report on 1,556 transplants that took place during  
44 the period 2010-2014 during pilot volunteer scheme [17,42,55–57,60,64]. One paper did not  
45 report the years the organs were procured.[37]  
46  
47  
48  
49  
50  
51  
52

53  
54 Turning to the 30 papers without explicit statement about prisoners, 14 of these stated that  
55 organs were procured from volunteers, without indicating whether or not prisoners were  
56  
57  
58  
59  
60

1  
2  
3 excluded as volunteers.[68–81] Three of the 14 stated that informed consent was provided by  
4  
5 donors or their families.[69,73,75]

6  
7 Six papers reported that donors gave informed consent for donation, but did not record  
8  
9 whether or not donors were volunteers or prisoners.[82–87]

10  
11 There were 10 papers that contained information implying that donations were from  
12  
13 voluntary, non-prisoner sources, without explicitly stating this, or that consent was  
14  
15 provided.[88–97] The statements from these papers are in Table 6.

16  
17  
18  
19 Table 6: Text from papers reported in “Other” category of donor ID information

|                                                                                                    |                                                                                                                                                                                    |
|----------------------------------------------------------------------------------------------------|------------------------------------------------------------------------------------------------------------------------------------------------------------------------------------|
| 21<br>22<br>23<br>24<br>25<br>26<br>27<br>28<br>29<br>30<br>31<br>32<br>33<br>34<br>35<br>36<br>37 | All the donors were from traffic accidents or cerebral bleeding coma [88]                                                                                                          |
| 38<br>39<br>40<br>41<br>42                                                                         | No organ trafficking involved [89]                                                                                                                                                 |
| 43<br>44<br>45                                                                                     | Organ donation was conducted legally, following local regulations [90]                                                                                                             |
| 46<br>47<br>48<br>49<br>50<br>51<br>52<br>53<br>54<br>55<br>56<br>57<br>58<br>59<br>60             | Five donors were brain dead due to car accident, their respiration was maintained by mechanical ventilation and hemodynamics was stabilized by minimum doses of catecholamine [91] |
|                                                                                                    | The deceased donor livers were obtained through both social and legal donation [92]                                                                                                |
|                                                                                                    | The donation procedure followed the DCD guidelines of China [93]                                                                                                                   |
|                                                                                                    | Severe injuries and traffic accidents were the main reasons for DCD [94]                                                                                                           |
|                                                                                                    | Normal control hearts came from autopsies or donors with no history of heart disease who died in accidents [95]                                                                    |

1  
2  
3 All the DBCD grafts were procured under controlled condition. Detailed  
4 information of the DBCD donors was obtained from The Chinese Red Cross  
5 and the OPO records. [96]  
6  
7  
8  
9

10 All donors were in hospital's ICU before death. (cause of death for each  
11 donor is supplied in a table) [97]  
12  
13  
14  
15

16 These statements do not necessarily preclude inclusion of organs procured from executed  
17 prisoners as, for example, two papers refer to legal donation,[90,92] which might include  
18 organs from executed prisoners, while two refer to donors dying from severe injuries or in  
19 accidents, both of which are potential descriptors for executions.[94,95]  
20  
21  
22  
23  
24

25 Looking at all of the donor ID statements by year of transplant, there are a total of 30 papers  
26 that either stated explicitly that no organs from prisoners were used (18) or indicated that  
27 donations were voluntary and/or consenting during the time period when executed prisoners  
28 were the sole source (excluding 120 volunteer donations across all of China). These data are  
29 in Table 7, along with the same data for the whole set of included papers. Of the 445 papers,  
30 192 (43%) report on research that took place when the only organs available for transplant  
31 were from executed prisoners, while another 148 (33%) spanned the start of the volunteer  
32 donor pilot so must include at least some data derived from executed prisoners.  
33  
34  
35  
36  
37  
38  
39  
40  
41  
42  
43  
44  
45  
46  
47  
48  
49  
50  
51  
52  
53  
54  
55  
56  
57  
58  
59  
60

Table 7: Numbers of papers, including those with Donor ID statements by years and numbers of transplants

|                                                                  | No date of transplants in papers | All transplants prior to 2010 | Transplants before and after 2010 when volunteer pilot started | All transplants took place during pilot 2010-2014 | Transplants occurred before and after 2014 | All transplants occurred post 2014 |
|------------------------------------------------------------------|----------------------------------|-------------------------------|----------------------------------------------------------------|---------------------------------------------------|--------------------------------------------|------------------------------------|
| Total included papers<br>(No. of transplants)                    | 61<br>(2,959)                    | 192<br>(28,442)               | 148<br>(49,376)                                                | 38<br>(3,937)                                     | 6<br>(763)                                 | 0                                  |
| 33 papers claiming no executed prisoners<br>(No. of transplants) | 1<br>(47)                        | 18<br>(2,641)                 | 8<br>(1,212)                                                   | 6<br>(1,556)                                      | 0                                          | 0                                  |
| 14 papers claiming volunteers<br>(No. of transplants)            | 1<br>(321)                       | 8<br>(2,269)                  | 4<br>(387)                                                     | 1<br>(12)                                         | 0                                          | 0                                  |

|                                                                                                          |           |            |              |            |   |   |
|----------------------------------------------------------------------------------------------------------|-----------|------------|--------------|------------|---|---|
| 6 papers claiming<br>donors gave consent<br>(No. of transplants)                                         | 1<br>(40) | 3<br>(200) | 2<br>(1,197) | 0          | 0 | 0 |
| 10 papers with<br>statement about donors<br>implying voluntariness<br>or consent (No. of<br>transplants) | 2<br>(11) | 0          | 4<br>(619)   | 4<br>(153) | 0 | 0 |

For peer review only

The majority of the papers reporting on donor identity also reported some form of institutional ethics approval, but 7 papers did not.[37,38,44,69,84,86,97]

Turning to the journals that published the 445 papers, a full list of these is in Supplementary File 6.

Seventeen journals published 5 or more papers during the study period. In this subset of 17, the proportion with ethics statements ranged from 38-100%, while the proportion with donor identity statements ranged from 0-40%. (see Table 8)

Table 8: List of journals publishing 5 or more papers, and numbers of those papers in which there were ethics and/or donor identity statements.

| Journal                                   | CiteScore* | Total papers in journal out of 445 (%) | Number of papers with ethics statement (%) | Number of papers with donor ID (%) |
|-------------------------------------------|------------|----------------------------------------|--------------------------------------------|------------------------------------|
| Transplantation Proceedings               | 0.98       | 65 (15%)                               | 25 (38%)                                   | 12 (18%)                           |
| PLoS ONE                                  | 3.11       | 20 (4%)                                | 19 (95%)                                   | 5 (25%)                            |
| Clinical Transplantation                  | 1.67       | 16 (4%)                                | 9 (56%)                                    | 3 (19%)                            |
| Liver Transplantation                     | 2.50       | 15 (3%)                                | 12 (80%)                                   | 3 (20%)                            |
| Hepato-Gastroenterology                   | 0.98       | 14 (3%)                                | 11 (79%)                                   | 2 (14%)                            |
| Experimental and Clinical Transplantation | 0.54       | 11 (2%)                                | 10 (91%)                                   | 1 (9%)                             |

|                                                                |      |        |          |         |
|----------------------------------------------------------------|------|--------|----------|---------|
| Clinics and Research in<br>Hepatology and<br>Gastroenterology  | 1.61 | 8 (2%) | 7 (88%)  | 1 (13%) |
| International Journal of Clinical<br>and Experimental Medicine | 1.17 | 8 (2%) | 5 (63%)  | 1 (13%) |
| Annals of Transplantation                                      | 1.29 | 7 (2%) | 4 (57%)  | 0 (0%)  |
| International Journal of Clinical<br>Practice                  | 1.91 | 6 (1%) | 5 (83%)  | 0 (0%)  |
| Journal of Cancer Research and<br>Clinical Oncology            | 3.32 | 6 (1%) | 5 (83%)  | 1 (17%) |
| Transplantation                                                | 2.71 | 6 (1%) | 5 (83%)  | 1 (17%) |
| European Journal of<br>Gastroenterology and<br>Hepatology      | 1.88 | 5 (1%) | 5 (100%) | 1 (20%) |
| Experimental and Therapeutic<br>Medicine                       | 1.42 | 5 (1%) | 5 (100%) | 1 (20%) |
| Medical Oncology                                               | 1.91 | 5 (1%) | 5 (100%) | 0 (0%)  |
| Medicine (United States)                                       | 1.63 | 5 (1%) | 5 (100%) | 1 (20%) |
| Surgery (United States)                                        | 2.77 | 5 (1%) | 5 (100%) | 2 (40%) |

\*Average citations received per document published in the journal (Source: SCOPUS)



1  
2  
3 Finally, in terms of journals with specific policies banning publication of research based on  
4 use of prisoners' organs, our study identifies one paper published in the *American Journal of*  
5 *Transplantation* [79] and five papers published in *Transplantation* (the official journal of  
6  
7 TTS) that appear to be in breach of their own stated policies.[84,98–101]  
8  
9  
10

## 11 12 13 **Discussion**

14  
15 This study shows that the majority of the published literature identified in this scoping review  
16 reporting research on transplants in China from 2000-April 2017 fails to comply with ethical  
17 standards regarding exclusion of research based on organs procured from prisoners. The body  
18 of literature contains a large number of papers that almost certainly include data from  
19 executed prisoners given China's acknowledgement that during this period the primary organ  
20 source was executed prisoners. While TTS policy appears to have been partially successful in  
21 that the number of papers claiming IRB approvals rose steeply after that policy was published  
22 in 2006, the inclusion of this information has not addressed the major underlying concern  
23 about use of prisoners' organs. This is because the ethics review process focuses on the  
24 protection of research participants and their informed consent for participation in research. In  
25 transplant research, it is the recipients of transplants who are protected by IRB review, rather  
26 than the organ donors. Therefore claims about compliance with the Declaration of Helsinki  
27 are largely irrelevant regarding the use of prisoners' organs in research. Few papers (14%)  
28 include any information about the organ donors. Only half of these explicitly state that no  
29 organs were procured from executed prisoners, but many of these claims are incompatible  
30 with what is known about volunteer organ sources in China.  
31  
32

33  
34 Our findings raise significant issues. First, there is the broad question of what to do about the  
35 large body of literature based on research using organs from prisoners. It can be argued that  
36 prior to 2006, the international transplant community was not aware that China's transplants  
37  
38  
39  
40  
41  
42  
43  
44  
45  
46  
47  
48  
49

1  
2  
3 were procured from executed prisoners. However, post-2006 and the publication of TTS  
4 policy, professional claims of ignorance are hard to support. This lack of vigilance on the part  
5 of reviewers, editors and publishers is morally concerning, given the large numbers of papers  
6 (over 85%) accepted for publication with no information at all on the source of donor organs,  
7 especially where individual journals have explicitly adopted relevant policy (*Transplantation*,  
8 *American Journal of Transplantation*).

9  
10 Continued use of this research raises potential issues of complicity[102] to the extent that the  
11 international community (including members of TTS, journal editors, and peer-reviewers)  
12 condemn the use of executed prisoners' organs in research, but nonetheless benefit from this  
13 practice by allowing or facilitating the publication of such research, and subsequently using  
14 the findings. The obligations of third parties to avoid complicity depend in part on the  
15 magnitude of the moral wrong in question.[103] Some research uses of datasets that were  
16 obtained illicitly may be permissible.[104] By comparison, there is broad consensus that it is  
17 unethical to make use of the data obtained from Nazi medical experiments where the victims  
18 were killed or harmed in the course of the research.[105,106] The use of research based on  
19 organs sourced from executed Chinese prisoners, many of whom are prisoners of  
20 conscience,[21,107] falls at the severe end of this spectrum of moral wrongs in research. The  
21 obligation of third parties, such as peer-reviewers, publishers, and editors to avoid complicity  
22 is therefore comparatively high in this case, and may warrant consideration of large scale  
23 retractions, at least of the 340 papers that are based exclusively or partially on data from  
24 executed prisoners (as per Table 7). In addition, due to lack of vigilance by the journals on  
25 reporting organ sources, users of the data also risk complicity.

26  
27 Second, there is a more specific question for journal editors regarding published papers that  
28 make almost certainly false claims about sourcing organs from non-prisoner sources. In 29 of  
29 the 63 papers claiming or implying that organs were non-prisoner sources and/or donated  
30  
31  
32  
33  
34  
35  
36  
37  
38  
39  
40  
41  
42  
43  
44  
45  
46  
47  
48  
49  
50  
51  
52  
53  
54  
55  
56  
57  
58  
59  
60

1  
2  
3 voluntarily or with consent, the claims are incompatible with what is known about voluntary  
4 donations across China in the relevant time period. There is less certainty regarding the  
5 falsity of claims in published papers reporting on transplants that took place between 2010-  
6 2014 given the existence of a pilot voluntary donation scheme. Determining the likely  
7 veracity of these claims requires sustained investigation, including of Chinese language  
8 sources. To date there has been one detailed investigation, leading to the retraction of a paper  
9 that falsely claimed more organs were procured from volunteers than there were reported  
10 volunteers at the relevant hospital.[108–110] This is to date the only retraction in the  
11 literature. At the very least however, reviewers, editors and journals should be aware that  
12 prior to 2010 there were almost no voluntary donors, and that the alleged numbers of  
13 volunteer donors during the 2010-2014 pilot scheme were low (see Table 5).

14  
15 Finally, there is a question regarding future publication of Chinese transplant papers. In our  
16 view, it is unacceptable to publish any papers that are highly likely to contain data derived  
17 from use of prisoners' organs. This includes data from transplants up until the end of 2014,  
18 given the difficulty of establishing organ provenance and the demonstrated lack of veracity in  
19 the claims of at least some authors. However, even transplants post-2015 may involve  
20 prisoners' organs.[19] For this reason, we suggest an interim moratorium on publication of all  
21 relevant papers, pending an international summit to develop policy. A summit involving  
22 representatives from the International Committee of Medical Journal Editors, Committee on  
23 Publication Ethics, The Transplantation Society and members of other relevant national and  
24 international transplant societies, China human rights experts, ethicists and any other relevant  
25 stakeholders could develop policy on handling relevant published and future research. One  
26 outcome of this process could be the development of a checklist tool for all transplant papers.  
27 An international and widely adopted process of this kind would provide a strong incentive for  
28 China to move more rapidly towards an organ donation system that is ethical, transparent and  
29

1  
2  
3 verifiable. This incentive is currently lacking given the widespread publication of unethical  
4  
5 research.

### 6 7 *Limitations*

8  
9 The strengths of the study lie in its originality and robust methods. These give confidence that  
10  
11 the results are reliable and likely to be conservative rather than to overestimate the findings.  
12  
13 However, there are potential limitations. First, scoping reviews are less comprehensive than  
14  
15 systematic reviews, making it possible that relevant papers were not identified and included.  
16  
17 Second, we had to change our approach to data collection during the study, as the quality of  
18  
19 data in the papers was so poor. This affected the study in two ways. We were not able to  
20  
21 report on research involving kidney transplants due to lack of information as to whether  
22  
23 donors were living or deceased; and we were not able to report on the type of donation  
24  
25 (whether after death declared on cardiac or brain criteria) as this information was poorly and  
26  
27 inconsistently reported. Finally, unless stated otherwise in the papers reporting on liver  
28  
29 transplants, we have assumed the donors were deceased. It is possible that some of the  
30  
31 transplants classified as deceased donor were from living split liver transplants, however we  
32  
33 think the number is likely to be very low as deceased donation is the commonest type of  
34  
35 transplant and numbers of living liver donations in China are low, at 7.37% of total  
36  
37 cumulative liver transplants as of end 2011, according to official data.[111] Finally, we have  
38  
39 reported the total number of participants (and hence number of transplants) in the included  
40  
41 studies, but this number is likely to be inflated by multiple publication of the same and  
42  
43 overlapping research cohorts. However, as our aim was to report on whether or not published  
44  
45 research met the ethical reporting standards mandated by The Transplant Society, we do not  
46  
47 think this is a critical issue.  
48  
49  
50  
51  
52  
53  
54  
55  
56  
57  
58  
59  
60

## Conclusion

The transplant community has failed to implement ethical standards banning publication of research using material from executed prisoners. As a result, a large body of unethical published research now exists, raising questions of complicity to the extent that the transplant community uses and benefits from the results of this research. Our study has identified the extent of this problem as well as specific papers containing demonstrably false claims about organ sourcing. There has been a significant lack of vigilance and failure to adhere to accepted ethical standards by reviewers, editors and publishers. Researchers and clinicians who use this body of research risk complicity by implicitly accepting Chinese methods of organ procurement. We suggest an international summit to determine how to manage this existing body of research and develop future policy for handling Chinese transplant research.

## Statements and Declarations

### Author contributions

All authors (WAR, MPR, AB, BB, RC, RCW, MFS) contributed substantially to the conception and design of the work and to the analysis and interpretation of the data. All authors contributed to revisions and approved the final draft. All authors agree to be accountable for all aspects of the work in ensuring that any questions related to the accuracy or integrity of any part of the work are appropriately investigated and resolved.

Specific individual contributions in addition to the above:

WAR led the drafting of the paper and contributed to data extraction.

MPR contributed to literature searching and data extraction.

AB contributed to literature searching and drafting sections of the manuscript.

BB contributed to data extraction and preparation of figures and tables.

RC contributed to data extraction.

RCW contributed to resolving data extraction outcomes.

MFS contributed to the Introduction.

The lead author (Wendy Rogers, the manuscript's guarantor) affirms that the manuscript is an honest, accurate, and transparent account of the study being reported. No important aspects of the study have been omitted; and that any discrepancies from the study as planned (and, if relevant, registered) have been explained.

### Competing interests disclosures

Dr. Ballantyne is a member of the New Zealand Advocacy & Initiatives Committee (NZAIC) of the International Coalition to End Transplant Abuse in China.

Dr. Blakely has nothing to disclose.

Dr. Catsanos has nothing to disclose.

1  
2  
3 Dr. Clay-Williams is a member of the Australian Advocacy and Initiatives Committee of the  
4  
5 International Coalition to End Transplant Abuse in China.

6  
7 Prof Fiatarone Singh is a member of the Ethics Committee of Doctors Against Forced Organ  
8  
9 Harvesting, and a member of the Australian Advocacy and Initiatives Committee of the  
10  
11 International Coalition to End Transplant Abuse in China.

12  
13 Mr. Robertson reports that he is an occasional expert contributor to the International  
14  
15 Coalition to End Transplant Abuse in China.

16  
17 Prof Rogers is a Director of the NGO “International Coalition to End Transplant Abuse in  
18  
19 China” and is chair of its international advisory committee.  
20  
21  
22  
23

#### 24 **Ethics approval**

25  
26 No ethics committee approval was required as this study did not involve any patient data.  
27  
28  
29  
30

#### 31 **Clinical trial registration**

32  
33 This study is a scoping review therefore was not registered as a clinical trial.  
34  
35  
36  
37

#### 38 **Funding**

39  
40 This research received no specific grant from any funding agency in the public, commercial  
41  
42 or not-for-profit sectors.  
43  
44  
45

#### 46 **Data sharing**

47  
48 The full list of 445 included studies is published in Supplementary File 3.  
49  
50  
51  
52  
53  
54  
55  
56  
57  
58  
59  
60

1  
2  
3 **List of Supplementary Files**

4  
5 Supplementary File 1: Search strategies

6  
7 Supplementary File 2: Details extracted from included studies

8  
9 Supplementary File 3: Full list of 445 studies, bibliographic details

10  
11 Supplementary File 4: Results table

12  
13 Supplementary File 5: Bibliographic details of 63 studies containing some information

14  
15 regarding identity of and/or consent by donors

16  
17 Supplementary File 6: Full list of journals publishing papers included in the study



## References

- 1 World Health Organization. WHO guiding principles on human cell, tissue and organ transplantation. *Transplantation* 2010;**90**:229–33.
- 2 WMA - The World Medical Association-WMA Statement on Organ and Tissue Donation. <https://www.wma.net/policies-post/wma-statement-on-organ-and-tissue-donation/> (accessed 7 Feb 2018).
- 3 Stock P. Policy and Ethics. The Transplantation Society. <https://www.tts.org/about-tts-5/governance/policy-a-ethics> (accessed 7 Feb 2018).
- 4 Amnesty International. *Amnesty International Report 2011: The State of the World's Human Rights*. Amnesty International Publications 2011.
- 5 The Declaration of Istanbul on Organ Trafficking and Transplant Tourism. The Declaration of Istanbul Custodian Group. <http://www.declarationofistanbul.org/> (accessed 7 Feb 2018).
- 6 Tibell A. The Transplantation Society's policy on interactions with China. *Transplantation* 2007;**84**:292–4.
- 7 The Transplantation Society. The Transplantation Society's principles for interacting with China. 2006. <https://www.tts.org/images/stories/pdfs/StatementMembs-ChineseTXProg.pdf>
- 8 Caplan AL, Danovitch G, Shapiro M, *et al*. Time for a boycott of Chinese science and medicine pertaining to organ transplantation. *Lancet* 2011;**378**:1218.
- 9 Lavee J, West LJ. A call for a policy change regarding publications based on transplantation of organs from executed prisoners. *J Heart Lung Transplant* 2012;**31**:555–6.
- 10 Danovitch GM, Shapiro ME, Lavee J. The Use of Executed Prisoners as a Source of Organ Transplants in China Must Stop. *Am J Transplant* 2011;**11**:426–8.
- 11 Caplan AL, Rockman HA, Turka LA. Editorial position on publishing articles on human organ transplantation. *J Clin Invest* 2012;**122**:2.
- 12 Smith CS. Doctor Says He Took Transplant Organs From Executed Chinese Prisoners. The New York Times. 2001. <https://www.nytimes.com/2001/06/29/world/doctor-says-he-took-transplant-organs-from-executed-chinese-prisoners.html> (accessed 17 Feb 2018).
- 13 Huang J. Ethical and legislative perspectives on liver transplantation in the People's Republic of China. *Liver Transpl* 2007;**13**:193–6.
- 14 BBC News - China admits death row organ use. BBC. <http://news.bbc.co.uk/2/hi/8222732.stm> (accessed 7 Feb 2018).
- 15 Wang H. New era for organ donation and transplant in China. Interview by Fiona Fleck. *Bull World Health Organ* 2012;**90**:802–3.

- 1  
2  
3 16 Zhao H, Wu N. 专访黄洁夫:中国器官移植事业光明正大地登上世界舞台 [Exclusive  
4 Interview with Huang Jiefu: The China Organ Transplant Field Justly and Honorably  
5 Steps Onto the World Stage]. *China Healthcare*. 2015. <https://perma.cc/X73M-HNRX>  
6 (accessed 23 Mar 2018).  
7
- 8  
9 17 Huang J-F, Zheng S-S, Liu Y-F, *et al*. China organ donation and transplantation update:  
10 the Hangzhou Resolution. *Hepatobiliary Pancreat Dis Int* 2014;**13**:122–4.  
11
- 12 18 Paul NW, Caplan A, Shapiro ME, *et al*. Human rights violations in organ procurement  
13 practice in China. *BMC Med Ethics* 2017;**18**:11.  
14
- 15 19 Kirchgaessner S. China may still be using executed prisoners' organs, official admits.  
16 *The Guardian*. 2017. [http://www.theguardian.com/world/2017/feb/07/china-still-using-](http://www.theguardian.com/world/2017/feb/07/china-still-using-executed-prisoners-organs-transplants-vatican)  
17 [executed-prisoners-organs-transplants-vatican](http://www.theguardian.com/world/2017/feb/07/china-still-using-executed-prisoners-organs-transplants-vatican) (accessed 21 Mar 2018).  
18
- 19 20 Caplan A. The Use of Prisoners as Sources of Organs—An Ethically Dubious Practice.  
20 *Am J Bioeth* 2011;**11**:1–5.  
21
- 22 21 Matas D, Kilgour D. *Bloody harvest : the killing of Falun Gong for their organs*.  
23 Woodstock, ON: : Seraphim Editions 2009.  
24
- 25 22 United States. Congressional-Executive Commission on China. *Falun Gong in China:  
26 Review and Update : Hearing Before the Congressional-Executive Commission on  
27 China, One Hundred Twelfth Congress, Second Session, December 18, 2012*. U.S.  
28 Government Printing Office 2013.  
29
- 30 23 Levac D, Colquhoun H, O'Brien KK. Scoping studies: advancing the methodology.  
31 *Implement Sci* 2010;**5**:69.  
32
- 33 24 Arksey H, O'Malley L. Scoping studies: towards a methodological framework. *Int J Soc  
34 Res Methodol* 2005;**8**:19–32.  
35
- 36 25 Xie W, Ye Q, Wan Q. A comparison of risk factors for septic shock in renal transplant  
37 recipients with liver transplant recipients with bloodstream infections. *Exp Clin Cardiol*  
38 2014;**20**:3587–97.  
39
- 40 26 Ye Q, Ma Y, Wan Q, *et al*. The distribution and resistance of pathogens causing blood  
41 stream infections following liver transplantation: A clinical analysis of 69 patients.  
42 *Hepatogastroenterology* 2014;**61**:2311–4.  
43
- 44 27 Zhu L, Liao S, Wang N, *et al*. Dose regimens for Chinese adult liver transplant  
45 recipients according to the genetic polymorphisms of CYP2C9, CYP2C19, and CYP3A5  
46 in recipients and donors. *Int J Clin Pharmacol Ther* 2016;**54**:587–96.  
47
- 48 28 Nie X, Wan Q, Ye Q, *et al*. Fungemias following liver or kidney transplantation: A  
49 clinical analysis of 17 patients. *J Pure Appl Microbiol* 2014;**8**:667–70.  
50
- 51 29 Tsai HI, Tsai YF, Yu HP. Arterial waveform monitoring during liver transplantation.  
52 *Exp Clin Cardiol* 2014;**20**:145–57.  
53
- 54 30 Yang X, Lu Q, Tang T, *et al*. Prediction of the prognosis after liver transplantation in  
55  
56  
57  
58  
59

- 1  
2  
3 severe hepatitis B-induced liver failure and clinical decision for liver transplantation. *J Surg Res* 2013;**183**:846–51.  
4  
5  
6 31 Mu H-J, Xie P, Chen J-Y, *et al.* Association of TNF- $\alpha$ , TGF- $\beta$ 1, IL-10, IL-6, and IFN- $\gamma$   
7 gene polymorphism with acute rejection and infection in lung transplant recipients. *Clin*  
8 *Transplant* 2014;**28**:1016–24.  
9  
10 32 Hu W-Y, Wu L-Q, Su Z, *et al.* Expression of human leukocyte antigen-G and acute  
11 rejection in patients following liver transplantation. *Exp Ther Med* 2014;**8**:1291–5.  
12  
13 33 黄洁夫 : 内地已有38家医院停用死囚器官[Huang Jiefu: 38 Hospitals in China Have  
14 Already Stopped Using Organs From Prisoners]. Beijing Times.  
15 2014.<http://npc.people.com.cn/n/2014/0307/c376899-24566378.html> (accessed 23 Mar  
16 2018).  
17  
18 34 Guo C-B, Li Y-C, Zhang M-M, *et al.* Early postoperative care of liver transplantation  
19 for infants with biliary atresia during pediatric intensive care unit stay. *Transplant Proc*  
20 2010;**42**:1750–4.  
21  
22 35 Lei J, Yan L. Outcome Comparisons Among the Hangzhou, Chengdu, and UCSF  
23 Criteria for Hepatocellular Carcinoma Liver Transplantation after Successful  
24 Downstaging Therapies. *J Gastrointest Surg* 2013;**17**:1116–22.  
25  
26 36 Chen YB, Li SD, Ju BL, *et al.* Suitable calcineurin inhibitor concentrations for liver  
27 transplant recipients in the Chinese population. *Transplant Proc* 2011;**43**:1751–3.  
28  
29 37 Chu Z, Zhang J, Zhao Y, *et al.* Influence of immunosuppressive drugs on the  
30 development of CD4<sup>+</sup>CD25<sup>high</sup> Foxp3<sup>+</sup> T cells in liver transplant recipients. *Transplant*  
31 *Proc* 2010;**42**:2599–601.  
32  
33 38 Gu L, Yu YC. Clinical outcome of dental implants placed in liver transplant recipients  
34 after 3 years: A case series. *Transplant Proc* 2011;**43**:2678–82.  
35  
36 39 Lei JY, Wang WT, Yan LN. Hangzhou criteria for liver transplantation in hepatocellular  
37 carcinoma: A single-center experience. *Eur J Gastroenterol Hepatol* 2014;**26**:200–4.  
38  
39 40 Li J, Liu B, Yan LN, *et al.* Reversal of Graft Steatosis After Liver Transplantation:  
40 Prospective Study. *Transplant Proc* 2009;**41**:3560–3.  
41  
42 41 Ling Q, Xie H, Lu D, *et al.* Association between donor and recipient TCF7L2 gene  
43 polymorphisms and the risk of new-onset diabetes mellitus after liver transplantation in  
44 a Han Chinese population. *J Hepatol* 2013;**58**:271–7.  
45  
46 42 Ling Q, Xu X, Wang K, *et al.* Donor PPAR $\alpha$  Gene Polymorphisms Influence the  
47 Susceptibility to Glucose and Lipid Disorders in Liver Transplant Recipients. *Medicine*  
48 2015;**94**:e1421.  
49  
50 43 Lu D, Xu X, Wang J, *et al.* The influence of a contemporaneous portal and hepatic  
51 artery revascularization protocol on biliary complications after liver transplantation.  
52 *Surgery* 2014;**155**:190–5.  
53  
54  
55  
56  
57  
58  
59  
60

- 1  
2  
3 44 Pan C, Shi Y, Zhang JJ, *et al.* Single-Center Experience of 253 Portal Vein Thrombosis  
4 Patients Undergoing Liver Transplantation in China. *Transplant Proc* 2009;**41**:3761–5.  
5  
6 45 Wang SY, Tang HM, Chen GQ, *et al.* Effect of ursodeoxycholic acid administration  
7 after liver transplantation on serum liver tests and biliary complications: A randomized  
8 clinical trial. *Digestion* 2012;**86**:208–17.  
9  
10 46 Wang Y, Liu Y, Han R, *et al.* Monitoring of CD95 and CD38 expression in peripheral  
11 blood T lymphocytes during active human cytomegalovirus infection after orthotopic  
12 liver transplantation. *J Gastroenterol Hepatol* 2010;**25**:138–42.  
13  
14 47 Xiao L, Fu ZR, Ding GS, *et al.* Prediction of survival after liver transplantation for  
15 chronic severe hepatitis b based on preoperative prognostic scores: A single center's  
16 experience in China. *World J Surg* 2009;**33**:2420–6.  
17  
18 48 Xu J, Shen ZY, Chen XG, *et al.* A randomized controlled trial of Licartin for preventing  
19 hepatoma recurrence after liver transplantation. *Hepatology* 2007;**45**:269–76.  
20  
21 49 Xu X, Guo HJ, Xie HY, *et al.* ZIP4, a novel determinant of tumor invasion in  
22 hepatocellular carcinoma, contributes to tumor recurrence after liver transplantation. *Int*  
23 *J Biol Sci* 2014;**10**:245–56.  
24  
25 50 Liu X, Ling Q, Wei Q, *et al.* Artificial Liver Support System Combined with Liver  
26 Transplantation in the Treatment of Patients with Acute-on-Chronic Liver Failure. *PLoS*  
27 *One* 2013;**8** (3) (no pagination).  
28  
29 51 Xu X, Tu Z, Wang B, *et al.* A novel model for evaluating the risk of hepatitis B  
30 recurrence after liver transplantation. *Liver Int* 2011;**31**:1477–84.  
31  
32 52 Xue F, Higgs BW, Huang J, *et al.* HERC5 is a prognostic biomarker for post-liver  
33 transplant recurrent human hepatocellular carcinoma. *J Transl Med* 2015;**13**.  
34 doi:10.1186/s12967-015-0743-2  
35  
36 53 Zhu M, Li Y, Xia Q, *et al.* Strong impact of acute kidney injury on survival after liver  
37 transplantation. *Transplant Proc* 2010;**42**:3634–8.  
38  
39 54 Chen J, Wang Y, Shen Z, *et al.* Early diagnostic value of plasma PCT and BG assay for  
40 CRBSI after OLT. *Transplant Proc* 2011;**43**:1777–9.  
41  
42 55 Fan X, Chen Z, Nasralla D, *et al.* The organ preservation and enhancement of donation  
43 success ratio effect of extracorporeal membrane oxygenation in circulatory unstable  
44 brain death donor. *Clin Transplant* 2016;**30**:1306–13.  
45  
46 56 Ling Q, Xie H, Li J, *et al.* Donor Graft MicroRNAs: A Newly Identified Player in the  
47 Development of New-onset Diabetes After Liver Transplantation. *Am J Transplant*  
48 2017;**17**:255–64.  
49  
50 57 Liu C, Tsai HL, Chin T, *et al.* Experience of surgical treatment for hepatoblastoma.  
51 *Formosan Journal of Surgery* 2016;**49**:56–62.  
52  
53 58 Wang Y, Shen Z, Zhu Z, *et al.* Clinical values of AFP, GPC3 mRNA in peripheral blood  
54 for prediction of hepatocellular carcinoma recurrence following OLT. *Hepat Mon*  
55  
56  
57  
58  
59  
60

- 2011;**11**:195–9.
- 59 Xu X, Ling Q, Wang J, *et al.* Donor miR-196a-2 polymorphism is associated with hepatocellular carcinoma recurrence after liver transplantation in a Han Chinese population. *International Journal of Cancer* 2016;**138**:620–9.
- 60 Yu Z, Sun Z, Yu S, *et al.* Safety limitations of fatty liver transplantation can be extended to 40%: Experience of a single centre in China. *Liver Int* Published Online First: 2016.
- 61 Zhang M, Yin F, Chen B, *et al.* Pretransplant prediction of posttransplant survival for liver recipients with benign end-stage liver diseases: A nonlinear model. *PLoS One* 2012;**7** (3) (no pagination).
- 62 Zhong L, Li H, Li Z, *et al.* C7 genotype of the donor may predict early bacterial infection after liver transplantation. *Sci Rep* 2016;**6**:24121.
- 63 Jiang L, Lei JY, Wang WT, *et al.* Immediate radical therapy or conservative treatments when meeting the Milan criteria for advanced HCC patients after successful TACE. *J Gastrointest Surg* 2014;**18**:1125–30.
- 64 Yu S, Yu J, Zhang W, *et al.* Safe use of liver grafts from hepatitis B surface antigen positive donors in liver transplantation. *J Hepatol* 2014;**61**:809–15.
- 65 Lee WC, Lee CS, Wang YC, *et al.* Validation of the model for end-stage liver disease score criteria in urgent liver transplantation for acute flare up of Hepatitis B. *Medicine* 2016;**95** (22) (no pagination).
- 66 中国模式+广州贡献'获国际器官捐献与移植学界点赞 [China model + Guangzhou donations' are praised by international organ donation and transplantation community]. China Organ Transplantation Development Foundation. 2017.<http://www.cotdf.org/index.php?m=content&c=index&a=show&catid=50&id=532> (accessed 30 Mar 2018).
- 67 Chang Q, Jing H, Sun M, *et al.* Exploring the role of short-course cyclosporin a therapy in preventing homograft valve calcification after transplantation. *Cell Immunol* 2014;**287**:36–45.
- 68 Chen ZY, Yan LN, Zeng Y, *et al.* Preliminary Experience With Indications for Liver Transplantation for Hepatolithiasis. *Transplant Proc* 2008;**40**:3517–22.
- 69 Fan J, Yang GS, Fu ZR, *et al.* Liver transplantation outcomes in 1,078 hepatocellular carcinoma patients: A multi-center experience in Shanghai, China. *J Cancer Res Clin Oncol* 2009;**135**:1403–12.
- 70 Gao Y, Zhang M, Li J, *et al.* Circulating FoxP3+ regulatory T and interleukin17-producing Th17 cells actively influence HBV clearance in De Novo Hepatitis B virus infected patients after orthotopic liver transplantation. *PLoS One* 2015;**10**. doi:10.1371/journal.pone.0137881
- 71 Hu XX, Yan LN. Retrospective analysis of prognostic factors after liver transplantation for intrahepatic cholangiocarcinoma in China: A single-center experience.

- 1  
2  
3 *Hepatogastroenterology* 2011;**58**:1255–9.
- 4  
5 72 Li F, Yang M, Li B, *et al.* Initial clinical results of orthotopic liver transplantation for  
6 hepatic alveolar echinococcosis. *Liver Transpl* 2007;**13**:924–6.
- 7  
8 73 Li H, He JW, Fu BS, *et al.* Immunosuppressant-related hip pain after orthotopic liver  
9 transplant. *Exp Clin Transplant* 2013;**11**:32–8.
- 10  
11 74 Zhang D, Jiao Z, Han J, *et al.* Clinicopathological features of hepatitis B virus  
12 recurrence after liver transplantation: Eleven-year experience. *Int J Clin Exp Pathol*  
13 2014;**7**:4057–66.
- 14  
15 75 Zhang M, Yin F, Chen B, *et al.* Mortality risk after liver transplantation in hepatocellular  
16 carcinoma recipients: A nonlinear predictive model. *Surgery* 2012;**151**:889–97.
- 17  
18 76 Zhang Y, Yan L, Wen T, *et al.* Prophylaxis against hepatitis B virus recurrence after  
19 liver transplantation for hepatitis B virus-related end-stage liver diseases with severe  
20 hypersplenism and splenomegaly: Role of splenectomy. *J Surg Res* 2012;**178**:478–86.
- 21  
22 77 Lei JY, Yan LN, Wang WT, *et al.* Health-Related Quality of Life and Psychological  
23 Distress in Patients With Early-Stage Hepatocellular Carcinoma After Hepatic Resection  
24 or Transplantation. *Transplant Proc* 2016;**48**:2107–11.
- 25  
26 78 Lin B, Geng L, Zheng Z, *et al.* The predictive value of blood neutrophil-lymphocyte  
27 ratio in patients with end-stage liver cirrhosis following ABO-incompatible liver  
28 transplantation. *J Res Med Sci* 2016;**21**:20–5.
- 29  
30 79 Jiang L, Yan L, Li B, *et al.* Prophylaxis against hepatitis B recurrence  
31 posttransplantation using lamivudine and individualized low-dose hepatitis B  
32 immunoglobulin. *Am J Transplant* 2010;**10**:1861–9.
- 33  
34 80 Chen Z, Gong R, Luo Y, *et al.* Surgical procedures for hepatolithiasis.  
35 *Hepatogastroenterology* 2010;**57**:134–7.
- 36  
37 81 Lin XH, Teng S, Wang L, *et al.* Fatigue and its associated factors in liver transplant  
38 recipients in Beijing: A cross-sectional study. *BMJ Open* 2017;**7** (2) (no pagination).
- 39  
40 82 Ran JH, Zhang SN, Liu J, *et al.* In-hospital and follow-up outcomes of patients  
41 undergoing orthotopic liver transplantation after hepatic artery reconstruction with an  
42 iliac interposition graft. *Int J Clin Exp Med* 2016;**9**:3939–45.
- 43  
44 83 Xu X, Ling Q, Gao F, *et al.* Hepatoprotective effects of marine and kuhuang in liver  
45 transplant recipients. *Am J Chin Med* 2009;**37**:27–34.
- 46  
47 84 Xu X, Ling Q, Zhang M, *et al.* Outcome of patients with hepatorenal syndrome type 1  
48 after liver transplantation: Hangzhou experience. *Transplantation* 2009;**87**:1514–9.
- 49  
50 85 Zhu XS, Wang SS, Cheng Q, *et al.* Using ultrasonography to monitor liver blood flow  
51 for liver transplant from donors supported on extracorporeal membrane oxygenation.  
52 *Liver Transpl* 2016;**22**:188–91.
- 53  
54 86 Yuefeng M, Weili F, Wenxiang T, *et al.* Long-term outcome of patients with lamivudine  
55  
56  
57  
58  
59  
60

- 1  
2  
3 after early cessation of hepatitis B immunoglobulin for prevention of recurrent hepatitis  
4 B following liver transplantation. *Clin Transplant* 2011;**25**:517–22.  
5
- 6 87 Liu Y, Liu YY, Li CP, *et al.* Comprehensive comparison of three different  
7 immunosuppressive regimens for liver transplant patients with hepatocellular carcinoma:  
8 Steroid-free immunosuppression, induction immunosuppression and standard  
9 immunosuppression. *PLoS One* 2015;**10** (3) (no pagination).  
10
- 11 88 Chen Y, Zhang H, Xiao X, *et al.* Peripheral blood transcriptome sequencing reveals  
12 rejection-relevant genes in long-term heart transplantation. *Int J Cardiol*  
13 2013;**168**:2726–33.  
14
- 15 89 Gao Y, Ren H, Meng F, *et al.* Pathological roles of interleukin-22 in the development of  
16 recurrent hepatitis C after liver transplantation. *PLoS One* 2016;**11**.  
17 doi:10.1371/journal.pone.0154419  
18
- 19 90 Gao YJ, Zhang M, Jin B, *et al.* A clinical-pathological analysis of hepatitis B virus  
20 recurrence after liver transplantation in Chinese patients. *J Gastroenterol Hepatol*  
21 2014;**29**:554–60.  
22
- 23 91 Li H, Li J, Wang Y, *et al.* Proteomic analysis of effluents from perfused human heart for  
24 transplantation: Identification of potential biomarkers for ischemic heart damage.  
25 *Proteome Sci* 2012;**10**. doi:10.1186/1477-5956-10-21  
26
- 27 92 Li WX, Li Z, Gao PJ, *et al.* Histological differentiation predicts post-liver  
28 transplantation survival time. *Clin Res Hepatol Gastroenterol* 2014;**38**:201–8.  
29
- 30 93 Sun XY, Dong JH, Qin K, *et al.* Single center study on transplantation of livers donated  
31 after cardiac death: A report of 6 cases. *Exp Ther Med* 2016;**11**:988–92.  
32
- 33 94 Zhu XS, Gao YH, Wang SS, *et al.* Contrast-enhanced ultrasound diagnosis of splenic  
34 artery steal syndrome after orthotopic liver transplantation. *Liver Transpl* 2012;**18**:966–  
35 71.  
36
- 37 95 Liu S, Bai Y, Huang J, *et al.* Do mitochondria contribute to left ventricular non-  
38 compaction cardiomyopathy? New findings from myocardium of patients with left  
39 ventricular non-compaction cardiomyopathy. *Mol Genet Metab* 2013;**109**:100–6.  
40
- 41 96 Liu X, Wang B, Zhang X, *et al.* Liver Transplantation Using Donation After Brain and  
42 Cardiac Death: A Single-Center Experience in China. *Transplant Proc* 2016;**48**:1879–  
43 86.  
44
- 45 97 Yuan X, Chen C, Zhou J, *et al.* Organ Donation and Transplantation From Donors With  
46 Systemic Infection: A Single-Center Experience. *Transplant Proc* 2016;**48**:2454–7.  
47
- 48 98 Liang TB, Li DL, Liang L, *et al.* Intraoperative blood salvage during liver  
49 transplantation in patients with hepatocellular carcinoma: Efficiency of leukocyte  
50 depletion filters in the removal of tumor cells. *Transplantation* 2008;**85**:863–9.  
51
- 52 99 Zheng S-S, Xu X, Wu J, *et al.* Liver transplantation for hepatocellular carcinoma:  
53 Hangzhou experiences. *Transplantation* 2008;**85**:1726–32.  
54  
55  
56  
57  
58  
59  
60

- 1  
2  
3 100 Xie SB, Zhu JY, Ying Z, *et al.* Prevention and risk factors of the HBV recurrence after  
4 orthotopic liver transplantation: 160 cases follow-up study. *Transplantation*  
5 2010;**90**:786–90.  
6  
7 101 Xue F, Zhang J, Han L, *et al.* Immune cell functional assay in monitoring of adult liver  
8 transplantation recipients with infection. *Transplantation* 2010;**89**:620–6.  
9  
10 102 Cohen GA. Casting the First Stone: Who Can, and Who Can't, Condemn the Terrorists?  
11 *Royal Institute of Philosophy Supplements* 2006;**58**:113–36.  
12  
13 103 Hickey D, Li SS, Morrison C, *et al.* Unit 731 and moral repair. *J Med Ethics*  
14 2017;**43**:270–6.  
15  
16 104 Thomas DR, Pastrana S, Hutchings A, *et al.* Ethical issues in research using datasets of  
17 illicit origin. In: *Proceedings of the 2017 Internet Measurement Conference*. ACM 2017.  
18 445–62.  
19  
20 105 Green RM. Benefiting from 'evil': an incipient moral problem in human stem cell  
21 research. *Bioethics* 2002;**16**:544–56.  
22  
23 106 Is it Ethical to Use Data from Nazi Medical Experiments? ABC News.  
24 2015.<http://www.abc.net.au/religion/articles/2015/06/11/4253136.htm> (accessed 30 Mar  
25 2018).  
26  
27 107 Gutmann E. *The slaughter: mass killings, organ harvesting, and China's secret solution*  
28 *to its dissident problem*. Prometheus Books Amherst 2014.  
29  
30 108 Retraction: 'Safety limitations of fatty liver transplantation can be extended to 40%:  
31 Experience of a single centre in China', by Yu Z., Yu S., Zhang L., Feng X., Zhang M.,  
32 *et al.* *Liver Int* 2017;**37**:767.  
33  
34 109 Rogers WA, Fiatarone Singh MA, Lavee J. Papers based on data concerning organs  
35 from executed prisoners should not be published. *Liver Int* 2017;**37**:769.  
36  
37 110 Rogers WA, Fiatarone Singh MA, Lavee J. Papers based on data concerning organs  
38 from executed prisoners should not be published: Response to Zheng and Yan. *Liver Int*  
39 2017;**37**:771–2.  
40  
41 111 Jiang WS, Zhou ZY *et al.* China Liver Transplant Registry Annual Report 2011. China  
42 Liver Transplant Registry 2011.  
43  
44  
45  
46  
47  
48  
49  
50  
51  
52  
53  
54  
55  
56  
57  
58  
59  
60



## PRISMA 2009 Flow Diagram

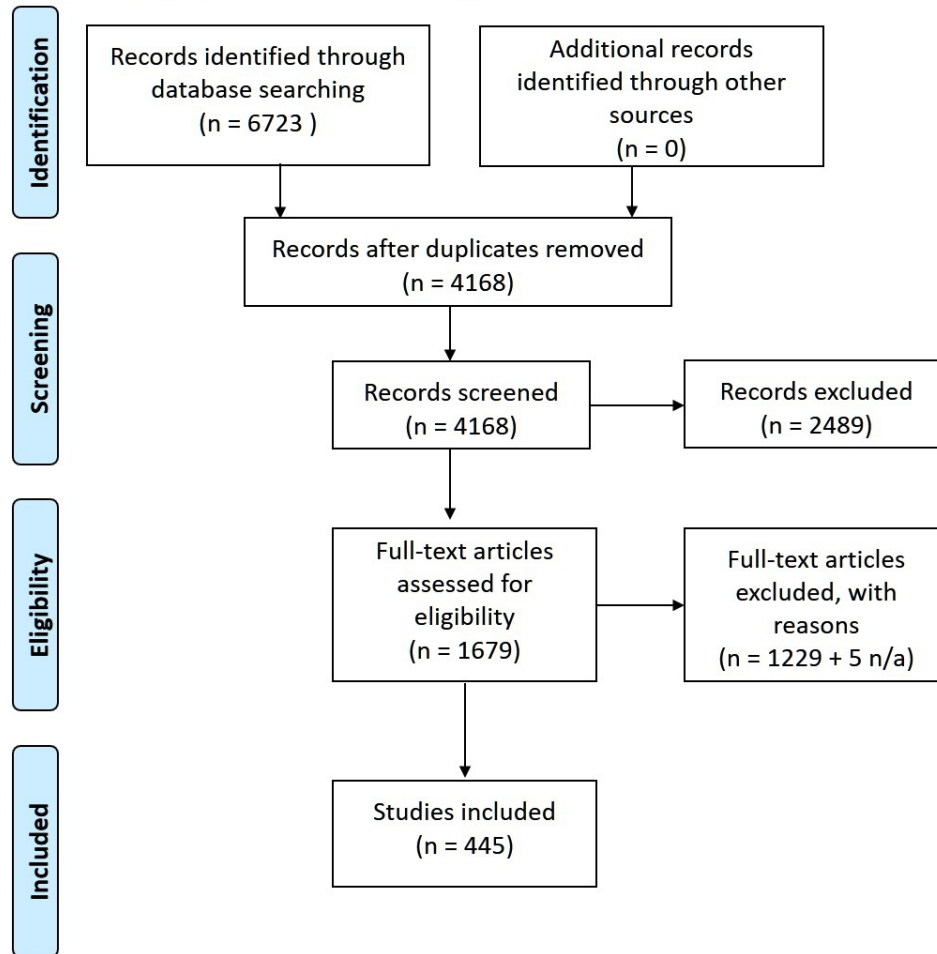

Figure 1: PRISMA flow chart detailing search strategy

180x183mm (150 x 150 DPI)

1  
2  
3  
4  
5  
6  
7  
8  
9  
10  
11  
12  
13  
14  
15  
16  
17  
18  
19  
20  
21  
22  
23  
24  
25  
26  
27  
28  
29  
30  
31  
32  
33  
34  
35  
36  
37  
38  
39  
40  
41  
42  
43  
44  
45  
46  
47  
48  
49  
50  
51  
52  
53  
54  
55  
56  
57  
58  
59  
60

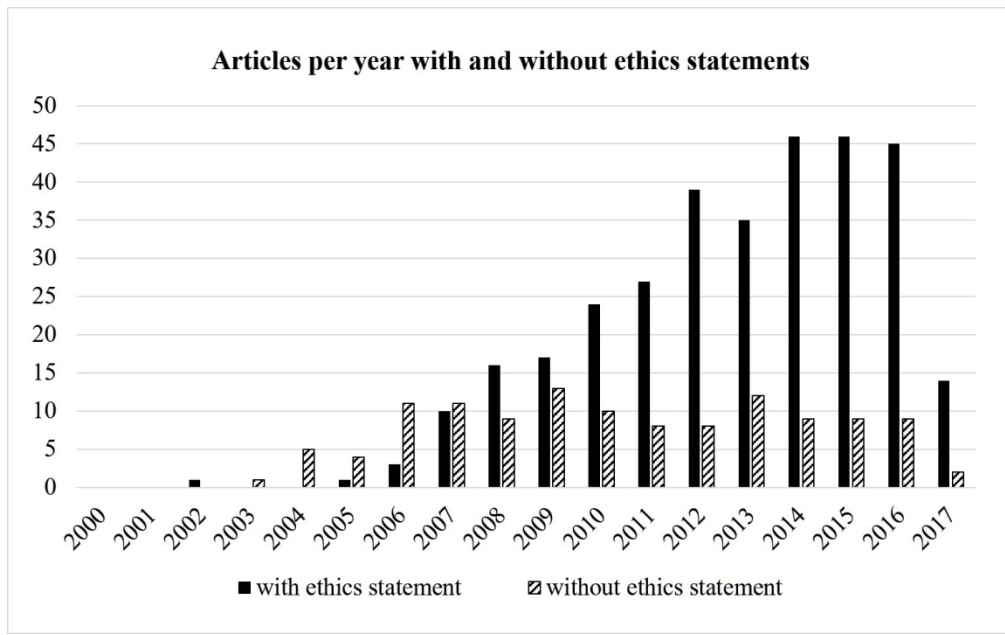

Figure 2: Articles per year with and without ethics statements

261x163mm (150 x 150 DPI)

1  
2  
3  
4  
5  
6  
7  
8  
9  
10  
11  
12  
13  
14  
15  
16  
17  
18  
19  
20  
21  
22  
23  
24  
25  
26  
27  
28  
29  
30  
31  
32  
33  
34  
35  
36  
37  
38  
39  
40  
41  
42  
43  
44  
45  
46  
47  
48  
49  
50  
51  
52  
53  
54  
55  
56  
57  
58  
59  
60

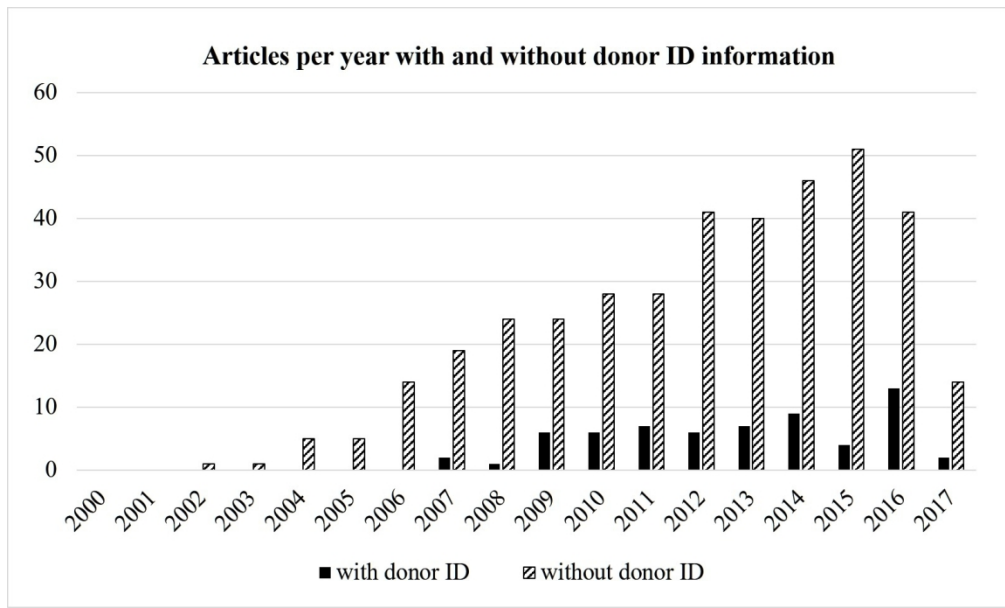

Figure 3: Inclusion of donor information by year of publication

269x161mm (150 x 150 DPI)

### Supplementary File1: Search strategies

All searches run on 5 April 2017

| <b>Medline*</b>                                                                                                                                                                                                                                                                                                                                                                                                                 |                                                                  | <b>Results<br/>:<br/>1702</b> |
|---------------------------------------------------------------------------------------------------------------------------------------------------------------------------------------------------------------------------------------------------------------------------------------------------------------------------------------------------------------------------------------------------------------------------------|------------------------------------------------------------------|-------------------------------|
| 1                                                                                                                                                                                                                                                                                                                                                                                                                               | exp Organ Transplantation/                                       |                               |
| 2                                                                                                                                                                                                                                                                                                                                                                                                                               | transplant*.ti,ab.                                               |                               |
| 3                                                                                                                                                                                                                                                                                                                                                                                                                               | 1 and 2                                                          |                               |
| 4                                                                                                                                                                                                                                                                                                                                                                                                                               | China.in.                                                        |                               |
| 5                                                                                                                                                                                                                                                                                                                                                                                                                               | 3 and 4                                                          |                               |
| 6                                                                                                                                                                                                                                                                                                                                                                                                                               | stem cells.ti,ab.                                                |                               |
| 7                                                                                                                                                                                                                                                                                                                                                                                                                               | mice.ti,ab.                                                      |                               |
| 8                                                                                                                                                                                                                                                                                                                                                                                                                               | Living Donors/                                                   |                               |
| 9                                                                                                                                                                                                                                                                                                                                                                                                                               | living donor.ti,ab.                                              |                               |
| 10                                                                                                                                                                                                                                                                                                                                                                                                                              | Case Reports/                                                    |                               |
| 11                                                                                                                                                                                                                                                                                                                                                                                                                              | or/6-10                                                          |                               |
| 12                                                                                                                                                                                                                                                                                                                                                                                                                              | 5 not 11                                                         |                               |
| 13                                                                                                                                                                                                                                                                                                                                                                                                                              | limit 12 to (English language and humans and yr="2000 -Current") |                               |
| <b>Timespan:</b> 2000-2017 (5 April)                                                                                                                                                                                                                                                                                                                                                                                            |                                                                  |                               |
| <b>SCOPUS</b>                                                                                                                                                                                                                                                                                                                                                                                                                   |                                                                  | <b>Results<br/>:<br/>2050</b> |
| (( TITLE ( transplant* ) AND AFFILCOUNTRY ( china ) AND NOT TITLE-ABS-KEY ( mice OR "stem cell" OR "living donor" OR "case report" ) ) AND PUBYEAR > 1999 ) AND ( EXCLUDE ( DOCTYPE , "cp" ) OR EXCLUDE ( DOCTYPE , "le" ) OR EXCLUDE ( DOCTYPE , "ed" ) ) AND ( LIMIT-TO ( LANGUAGE , "English" ) ) AND ( LIMIT-TO ( EXACTKEYWORD , "Human" ) OR LIMIT-TO ( EXACTKEYWORD , "Male" ) OR LIMIT-TO ( EXACTKEYWORD , "Female " ) ) |                                                                  |                               |
| <b>Embase</b>                                                                                                                                                                                                                                                                                                                                                                                                                   |                                                                  | <b>Results<br/>:<br/>2971</b> |
| 1                                                                                                                                                                                                                                                                                                                                                                                                                               | exp organ transplantation/                                       |                               |
| 2                                                                                                                                                                                                                                                                                                                                                                                                                               | china.in.                                                        |                               |
| 3                                                                                                                                                                                                                                                                                                                                                                                                                               | 1 and 2                                                          |                               |
| 4                                                                                                                                                                                                                                                                                                                                                                                                                               | stem cells.ti,ab.                                                |                               |
| 5                                                                                                                                                                                                                                                                                                                                                                                                                               | mice.ti,ab.                                                      |                               |
| 6                                                                                                                                                                                                                                                                                                                                                                                                                               | practice guideline/                                              |                               |
| 7                                                                                                                                                                                                                                                                                                                                                                                                                               | *"living donor"/                                                 |                               |
| 8                                                                                                                                                                                                                                                                                                                                                                                                                               | living donor.ti,ab.                                              |                               |
| 9                                                                                                                                                                                                                                                                                                                                                                                                                               | or/4-8                                                           |                               |
| 10                                                                                                                                                                                                                                                                                                                                                                                                                              | 3 not 9                                                          |                               |
| 11                                                                                                                                                                                                                                                                                                                                                                                                                              | limit 10 to (human and English language and yr="2000 -Current")  |                               |

|    |                                                                 |  |  |
|----|-----------------------------------------------------------------|--|--|
| 12 | limit 11 to article                                             |  |  |
| 13 | transplant*.ti,ab.                                              |  |  |
| 14 | 1 and 13                                                        |  |  |
| 15 | 2 and 14                                                        |  |  |
| 16 | 15 not 9                                                        |  |  |
| 17 | limit 16 to (human and English language and yr="2000 -Current") |  |  |
| 18 | limit 17 to article                                             |  |  |
| 19 | case report/                                                    |  |  |
| 20 | 18 not 19                                                       |  |  |

**Timespan:** 2000-2017 (5 April).  
Search language=Auto

**Supplementary File 2: Details extracted from included studies**

| Column ID | Descriptor                                                                                                                                                                                                                                                                                                                                                                                                                       |
|-----------|----------------------------------------------------------------------------------------------------------------------------------------------------------------------------------------------------------------------------------------------------------------------------------------------------------------------------------------------------------------------------------------------------------------------------------|
| A         | EndNote reference number                                                                                                                                                                                                                                                                                                                                                                                                         |
| B         | Title and abstract                                                                                                                                                                                                                                                                                                                                                                                                               |
| C         | Journal title                                                                                                                                                                                                                                                                                                                                                                                                                    |
| D         | url                                                                                                                                                                                                                                                                                                                                                                                                                              |
| E         | 0: Exclude<br>1: Include<br>2: Paper not available<br>3: For discussion                                                                                                                                                                                                                                                                                                                                                          |
| F         | Exclusion reason (see Table 2 for more details)                                                                                                                                                                                                                                                                                                                                                                                  |
| G         | Publication year                                                                                                                                                                                                                                                                                                                                                                                                                 |
| H         | Organ type: 1=hearts; 2=livers; 3=lungs; 4=other(combined)                                                                                                                                                                                                                                                                                                                                                                       |
| I         | Are donors clearly identified as deceased?<br>DD=deceased donors.                                                                                                                                                                                                                                                                                                                                                                |
| J         | Number of recipients with deceased or unknown source of transplants reported in research                                                                                                                                                                                                                                                                                                                                         |
| K         | Year/month in which first transplants took place                                                                                                                                                                                                                                                                                                                                                                                 |
| L         | Year/month in which final transplants took place                                                                                                                                                                                                                                                                                                                                                                                 |
| M         | Presence (=1) or absence (=0) of Institutional Review Board (Research Ethics Committee) approval for the research                                                                                                                                                                                                                                                                                                                |
| N         | Copy of text reporting ethics approval, if present                                                                                                                                                                                                                                                                                                                                                                               |
| O         | Information on identity of donors:<br>0 = No statement about identity of donors<br>1 = Explicit statement that organs came from volunteers or that no prisoners' organs were used<br>2 = Explicit statement that organs came from prisoners<br>3 = Sources mixed (i.e., prisoner and volunteer)<br>4 = Other (make note in column R)                                                                                             |
| P         | Copy of text reporting identity of donors, if present. This included any papers in which there was some statement that organs did not come from executed prisoners, or came from volunteers, or donor gave consent etc.                                                                                                                                                                                                          |
| Q         | Type of donation:<br>0 = No information<br>DBD = Donation after brain death – (death certified on neurological criteria)<br>DCD = Donation after cardiac death – or non-heart beating (death declared on circulatory criteria)<br>CDCD = China donation after citizen death - (a new China specific descriptor which denotes death declared on both neurological and circulatory criteria)<br>OT = Other (make note in column R) |
| R         | Comments                                                                                                                                                                                                                                                                                                                                                                                                                         |
| S         | Initials of author doing data extraction for this paper                                                                                                                                                                                                                                                                                                                                                                          |
| T         | Initials of author if this entry was checked                                                                                                                                                                                                                                                                                                                                                                                     |
| U         | Institution where transplants took place                                                                                                                                                                                                                                                                                                                                                                                         |

**Supplementary File: Full list of 445 studies, bibliographic details**

1. Awang DVC, Kong L, Jiang W. Schisandra extract elevates concentration of tacrolimus in blood of liver transplant patients. *Focus on Alternative and Complementary Therapies* 2010;15(3):236-37 doi: 10.1111/j.2042-7166.2010.01045\_9.xpublished Online First.
2. Bai DS, Dai Z, Zhou J, et al. Capn4 overexpression underlies tumor invasion and metastasis after liver transplantation for hepatocellular carcinoma. *Hepatology* 2009;49(2):460-70 doi: 10.1002/hep.22638published Online First.
3. Bu X, Zheng Z, Yu Y, et al. Significance of C4d Deposition in the Diagnosis of Rejection After Liver Transplantation. *Transplant Proc* 2006;38(5):1418-21 doi: 10.1016/j.transproceed.2006.03.018published Online First.
4. Cai CJ, Lu MQ, Chen YH, et al. Clinical study on prevention of HBV re-infection by entecavir after liver transplantation. *Clin Transplant* 2012;26(2):208-15 doi: 10.1111/j.1399-0012.2011.01448.xpublished Online First.
5. Cai Q, Li S, Jiang Y, et al. Alleviating graft injury during liver transplantation by improving retrograde perfusion in standard orthotopic liver transplantation. *Int J Clin Exp Med* 2016;9(2):4364-71 Online First.
6. Chen B, Gu Z, Chen H, et al. Establishment of high-performance liquid chromatography and enzyme multiplied immunoassay technology methods for determination of free mycophenolic acid and its application in Chinese liver transplant recipients. *Ther Drug Monit* 2010;32(5):653-60 doi: 10.1097/FTD.0b013e3181f01397published Online First.
7. Chen D, Fan J, Guo F, et al. Novel Single Nucleotide Polymorphisms in Interleukin 6 Affect Tacrolimus Metabolism in Liver Transplant Patients. *PLoS One* 2013;8(8) doi: 10.1371/journal.pone.0073405published Online First.
8. Chen D, Guo F, Shi J, et al. Association of hemoglobin levels, CYP3A5, and NR1I3 gene polymorphisms with tacrolimus pharmacokinetics in liver transplant patients. *Drug Metab Pharmacokinet* 2014;29(3):249-53 doi: 10.2133/dmpk.DMPK-13-RG-095published Online First.
9. Chen G, Liu H, Hu ZQ, et al. A new scheme with infusion of hepatitis B immunoglobulin combined with entecavir for prophylaxis of hepatitis B virus recurrence among liver transplant recipients. *Eur J Gastroenterol Hepatol* 2015;27(8):901-06 doi: 10.1097/MEG.0000000000000388published Online First.

10. Chen GH, Fu BS, Cai CJ, et al. A Single-Center Experience of Retransplantation for Liver Transplant Recipients With a Failing Graft. *Transplant Proc* 2008;40(5):1485-87 doi: 10.1016/j.transproceed.2008.01.076 published Online First.
11. Chen GH, Wang GY, Yang Y, et al. Single-center experience of therapeutic management of hepatic artery stenosis after orthotopic liver transplantation: Report of 20 cases. *Eur Surg Res* 2009;42(1):21-27 doi: 10.1159/000166601 published Online First.
12. Chen GH, Yang Y, Lu MQ, et al. Liver transplantation for end-stage alcoholic liver disease: a single-center experience from mainland China. *Alcohol* 2010;44(3):217-21 doi: 10.1016/j.alcohol.2010.02.010 published Online First.
13. Chen H, Chen E, Mao A, et al. Validation of limited sampling strategy for the estimation of mycophenolic acid exposure in Chinese adult liver transplant recipients. *Liver Transpl* 2007;13(12):1684-93 doi: 10.1002/lt.21293 published Online First.
14. Chen H, Gu Z, Chen B, et al. Models for the prediction of mycophenolic acid area under the curve using a limited-sampling strategy and an enzyme multiplied immunoassay technique in Chinese patients undergoing liver transplantation. *Clin Ther* 2008;30(12):2387-401 doi: 10.1016/j.clinthera.2008.12.017 published Online First.
15. Chen H, Peng C, Yu Z, et al. Pharmacokinetics of mycophenolic acid and determination of area under the curve by abbreviated sampling strategy in Chinese liver transplant recipients. *Clin Pharmacokinet* 2007;46(2):175-85 doi: 10.2165/00003088-200746020-00005 published Online First.
16. Chen HY, Han ZB, Fan JW, et al. MiR-203 expression predicts outcome after liver transplantation for hepatocellular carcinoma in cirrhotic liver. *Med Oncol* 2012;29(3):1859-65 doi: 10.1007/s12032-011-0031-9 published Online First.
17. Chen J, Li Y, Wang L, et al. Association of three SNPs in interleukin-28B with graft hepatic dysfunction after liver transplantation in Chinese Han population. *Gene* 2012;508(1):121-24 doi: 10.1016/j.gene.2012.07.065 published Online First.
18. Chen P, Wang W, Yan L, et al. Risk factors for first-year hospital readmission after liver transplantation. *Eur J Gastroenterol Hepatol* 2015;27(5):600-06 doi: 10.1097/MEG.00000000000003272015 published Online First.



19. Chen Y, Zhang H, Xiao X, et al. Peripheral blood transcriptome sequencing reveals rejection-relevant genes in long-term heart transplantation. *Int J Cardiol* 2013;168(3):2726-33 doi: 10.1016/j.ijcard.2013.03.095published Online First.
20. Chen YB, Li SD, Ju BL, et al. Suitable calcineurin inhibitor concentrations for liver transplant recipients in the Chinese population. *Transplant Proc* 2011;43(5):1751-53 doi: 10.1016/j.transproceed.2010.11.025published Online First.
21. Chen ZY, Yan LN, Zeng Y, et al. Preliminary Experience With Indications for Liver Transplantation for Hepatolithiasis. *Transplant Proc* 2008;40(10):3517-22 doi: 10.1016/j.transproceed.2008.07.142published Online First.
22. Cheng JW, Shi YH, Fan J, et al. An immune function assay predicts post-transplant recurrence in patients with hepatocellular carcinoma. *J Cancer Res Clin Oncol* 2011;137(10):1445-53 doi: 10.1007/s00432-011-1014-0published Online First.
23. Cheng L, Tian F, Tang L, et al. Local distribution analysis of cytotoxic molecules in liver allograft is helpful for the diagnosis of acute cellular rejection after orthotopic liver transplantation. *Diagn Pathol* 2012;7(1) doi: 10.1186/1746-1596-7-148published Online First.
24. Cheng Y, Huang L, Zhang X, et al. Liver transplantation nearly normalizes brain spontaneous activity and cognitive function at 1 month: A resting-state functional MRI study. *Metab Brain Dis* 2015;30(4):979-88 doi: 10.1007/s11011-015-9657-1published Online First.
25. Chu Z, Zhang J, Zhao Y, et al. Influence of immunosuppressive drugs on the development of CD4 +CD25high Foxp3+ T cells in liver transplant recipients. *Transplant Proc* 2010;42(7):2599-601 doi: 10.1016/j.transproceed.2010.04.026published Online First.
26. Dai Y, Li C, Wen TF, et al. Comparison of liver resection and transplantation for Child-pugh A cirrhotic patient with very early hepatocellular carcinoma and portal hypertension. *Pakistan Journal of Medical Sciences* 2014;30(5) doi: 10.12669/pjms.305.5038published Online First.
27. Deng JF, Geng L, Qian YG, et al. The Role of Toll-Like Receptors 2 and 4 in Acute Allograft Rejection After Liver Transplantation. *Transplant Proc* 2007;39(10):3222-24 doi: 10.1016/j.transproceed.2007.02.102published Online First.
28. Dong J, Zhu Y, Ma F, et al. Conditional disease-free survival after liver transplantation for hepatocellular carcinoma: A two-center experience. *Medicine (United States)* 2016;95(31) doi: 10.1097/MD.0000000000004383published Online First.

- 1  
2  
3  
4  
5  
6  
7  
8  
9  
10  
11  
12  
13  
14  
15  
16  
17  
18  
19  
20  
21  
22  
23  
24  
25  
26  
27  
28  
29  
30  
31  
32  
33  
34  
35  
36  
37  
38  
39  
40  
41  
42  
43  
44  
45  
46  
47  
48  
49  
50  
51  
52  
53  
54  
55  
56  
57  
58  
59  
60
29. Dong JY, Yin H, Li RD, et al. The relationship between adenosine triphosphate within CD4+ T lymphocytes and acute rejection after liver transplantation. *Clin Transplant* 2011;25(3):E292-E96 doi: 10.1111/j.1399-0012.2011.01429.xpublished Online First.
30. Duan BW, Lu SC, Lai W, et al. The detection of (total and ccc) HBV DNA in liver transplant recipients with hepatitis B vaccine against HBV reinfection. *Human Vaccines and Immunotherapeutics* 2015;11(10):2490-94 doi: 10.1080/21645515.2015.1063755published Online First.
31. Duan BW, Lu SC, Wu JS, et al. Model for end-stage liver disease (MELD) score does not predict outcomes of hepatitis beinduced acute-on-chronic liver failure in transplant recipients. *Transplant Proc* 2014;46(10):3502-06 doi: 10.1016/j.transproceed.2014.07.075published Online First.
32. Fan J, Yang GS, Fu ZR, et al. Liver transplantation outcomes in 1,078 hepatocellular carcinoma patients: A multi-center experience in Shanghai, China. *J Cancer Res Clin Oncol* 2009;135(10):1403-12 doi: 10.1007/s00432-009-0584-6published Online First.
33. Fan J, Zhang X, Ren L, et al. Donor IL-18 rs5744247 polymorphism as a new biomarker of tacrolimus elimination in Chinese liver transplant patients during the early post-transplantation period: Results from two cohort studies. *Pharmacogenomics* 2015;16(3):239-50 doi: 10.2217/pgs.14.166published Online First.
34. Feng ZY, Xu X, Zhu SM, et al. Effects of low central venous pressure during preanhepatic phase on blood loss and liver and renal function in liver transplantation. *World J Surg* 2010;34(8):1864-73 doi: 10.1007/s00268-010-0544-ypublished Online First.
35. Fu BS, Zhang T, Li H, et al. The role of liver transplantation for intrahepatic cholangiocarcinoma: A single-center experience. *Eur Surg Res* 2011;47(4):218-21 doi: 10.1159/000332827published Online First.
36. Fu YW, Wang WG, Zhou HL, et al. Presence of donor-and-recipient-derived DNA microchimerism in the cell-free blood samples of renal transplantation recipients associates with the acceptance of transplanted kidneys. *Asian Journal of Andrology* 2006;8(4):477-82 doi: 10.1111/j.1745-7262.2006.00147.xpublished Online First.
37. Gao F, Ye Q, Wan Q, et al. Distribution and resistance of pathogens in liver transplant recipients with *Acinetobacter baumannii* infection. *Ther Clin Risk Manag* 2015;11:501-05 doi: 10.2147/TCRM.S82251published Online First.

- 1  
2  
3  
4  
5 38. Gao PJ, Gao J, Li Z, et al. Hepatocellular carcinoma recurrence is an independent risk  
6 factor for HB recurrence after liver transplantation. *Hepatogastroenterology* 2014;61(134):1523-  
7 28 doi: 10.5754/hge14454published Online First.  
8  
9  
10 39. Gao S, Lin BY, Yang Z, et al. Role of overexpression of MACC1 and/or FAK in  
11 predicting prognosis of hepatocellular carcinoma after liver transplantation. *Int J Med Sci*  
12 2014;11(3):268-75 doi: 10.7150/ijms.7769published Online First.  
13  
14  
15 40. Gao Y, Ren H, Meng F, et al. Pathological roles of interleukin-22 in the development of  
16 recurrent hepatitis C after liver transplantation. *PLoS One* 2016;11(4) doi:  
17 10.1371/journal.pone.0154419published Online First.  
18  
19  
20 41. Gao Y, Zhang M, Li J, et al. Circulating FoxP3+ regulatory T and interleukin17-  
21 producing Th17 cells actively influence HBV clearance in De Novo Hepatitis B virus infected  
22 patients after orthotopic liver transplantation. *PLoS One* 2015;10(9) doi:  
23 10.1371/journal.pone.0137881published Online First.  
24  
25  
26  
27 42. Gao YJ, Zhang M, Jin B, et al. A clinical-pathological analysis of hepatitis B virus  
28 recurrence after liver transplantation in Chinese patients. *Journal of Gastroenterology and*  
29 *Hepatology (Australia)* 2014;29(3):554-60 doi: 10.1111/jgh.12404published Online First.  
30  
31  
32 43. Gu L, Jin W, Kan L, et al. A Retrospective Study to Compare the use of Tacrolimus and  
33 Cyclosporine in Combination with Adriamycin in Post-Transplant Liver Cancer Patients. *Cell*  
34 *Biochem Biophys* 2014;71(2):565-70 doi: 10.1007/s12013-014-0235-7published Online First.  
35  
36  
37  
38 44. Gu L, Yu YC. Clinical outcome of dental implants placed in liver transplant recipients  
39 after 3 years: A case series. *Transplant Proc* 2011;43(7):2678-82 doi:  
40 10.1016/j.transproceed.2011.06.037published Online First.  
41  
42  
43 45. Gu LH, Fang H, Li FH, et al. Prediction of early hepatic artery thrombosis by  
44 intraoperative color doppler ultrasound in pediatric segmental liver transplantation. *Clin*  
45 *Transplant* 2012;26(4):571-76 doi: 10.1111/j.1399-0012.2011.01580.xpublished Online First.  
46  
47  
48 46. Guo W, Sheng J, Gu Y, et al. Analysis and forecast for multidrug-resistant *Acinetobacter*  
49 *baumannii* infections among liver transplant recipients. *Transplant Proc* 2014;46(5):1448-52 doi:  
50 10.1016/j.transproceed.2014.02.027published Online First.  
51  
52  
53  
54  
55  
56  
57  
58  
59

- 1  
2  
3 47. Guo Z, He X, Wu L, et al. Model for end-stage liver disease versus the Child-Pugh score  
4 in predicting the post-transplant 3-month and 1-year mortality in a cohort of Chinese recipients.  
5 Surg Today 2010;40(1):38-45 doi: 10.1007/s00595-009-4114-6published Online First.  
6  
7  
8 48. Han ZB, Zhong L, Teng MJ, et al. Identification of recurrence-related microRNAs in  
9 hepatocellular carcinoma following liver transplantation. Mol Oncol 2012;6(4):445-57 doi:  
10 10.1016/j.molonc.2012.04.001published Online First.  
11  
12  
13 49. Hei Z, Chi X, Cheng N, et al. Upregulation of TLR2/4 expression in mononuclear cells in  
14 postoperative systemic inflammatory response syndrome after liver transplantation. Mediators  
15 Inflamm 2010;2010 doi: 10.1155/2010/519589published Online First.  
16  
17  
18 50. Hu B, Gao DJ, Yu FH, et al. Endoscopic stenting for post-transplant biliary stricture:  
19 Usefulness of a novel removable covered metal stent. Journal of Hepato-Biliary-Pancreatic  
20 Sciences 2011;18(5):640-45 doi: 10.1007/s00534-011-0408-3published Online First.  
21  
22  
23 51. Hu J, Wang Z, Fan J, et al. Genetic variations in plasma circulating DNA of HBV-related  
24 hepatocellular carcinoma patients predict recurrence after liver transplantation. PLoS One  
25 2011;6(10) doi: 10.1371/journal.pone.0026003published Online First.  
26  
27  
28 52. Hu J, Xie X, Li Y, et al. A novel noninvasive method to detect rejection after heart  
29 transplantation. Braz J Med Biol Res 2012;45(12):1195-201 doi: 10.1590/S0100-  
30 879X2012007500164published Online First.  
31  
32  
33 53. Hu WY, Wu LQ, Su Z, et al. Expression of human leukocyte antigen-G and acute  
34 rejection in patients following liver transplantation. Exp Ther Med 2014;8(4):1291-95 doi:  
35 10.3892/etm.2014.1917published Online First.  
36  
37  
38 54. Hu XX, Yan LN. Retrospective analysis of prognostic factors after liver transplantation  
39 for intrahepatic cholangiocarcinoma in China: A single-center experience.  
40 Hepatogastroenterology 2011;58(109):1255-59 doi: 10.5754/hge10704published Online First.  
41  
42  
43 55. Hu Y, Zhang X, Liu Y, et al. APACHE IV is superior to MELD scoring system in  
44 predicting prognosis in patients after orthotopic liver transplantation. Clinical and  
45 Developmental Immunology 2013;2013 doi: 10.1155/2013/809847published Online First.  
46  
47  
48 56. Hu Z, Zhou J, Li Z, et al. Salvage liver transplantation for recurrent hepatocellular  
49 carcinoma after liver resection: Retrospective study of the Milan and Hangzhou criteria. PLoS  
50 One 2014;9(1) doi: 10.1371/journal.pone.0087222published Online First.  
51  
52  
53  
54  
55  
56  
57  
58  
59  
60

- 1  
2  
3 57. Hu Z, Zhou J, Li Z, et al. Time interval to recurrence as a predictor of overall survival in  
4 salvage liver transplantation for patients with hepatocellular carcinoma associated with hepatitis  
5 B virus. *Surgery (United States)* 2015;157(2):239-48 doi: 10.1016/j.surg.2014.09.018published  
6 Online First.  
7  
8  
9  
10 58. Huang L, Li GM, Zhu JY, et al. Efficacy of sorafenib after liver transplantation in  
11 patients with primary hepatic carcinoma exceeding the Milan criteria: A preliminary study. *Oncol  
12 Targets Ther* 2012;5:457-62 doi: 10.2147/OTT.S31387published Online First.  
13  
14  
15 59. Huang M, Shan H, Jiang Z, et al. The use of coronary stent in hepatic artery stenosis after  
16 orthotopic liver transplantation. *Eur J Radiol* 2006;60(3):425-30 doi:  
17 10.1016/j.ejrad.2006.06.008published Online First.  
18  
19  
20 60. Huang Q, Zhai RY, Dai DK. Interventional Treatment of Hepatic Artery Stenosis After  
21 Orthotopic Liver Transplantation With Balloon-Expandable Coronary Stent. *Transplant Proc*  
22 2007;39(10):3245-50 doi: 10.1016/j.transproceed.2007.03.109published Online First.  
23  
24  
25 61. Huijun M, Ji Z, Ping X, et al. Linkage disequilibrium between tnf- $\alpha$ -308 G/A promoter  
26 and histocompatibility leukocyte antigen alleles in han-nationality lung transplant recipients from  
27 eastern china. *Exp Clin Transplant* 2013;11(3):264-69 doi: 10.6002/ect.2012.0099published  
28 Online First.  
29  
30  
31  
32 62. Jiang GQ, Bai DS, Chen P, et al. Starting hemoglobin value predicts early phase  
33 prognosis after liver transplantation. *Transplant Proc* 2011;43(5):1669-73 doi:  
34 10.1016/j.transproceed.2010.12.067published Online First.  
35  
36  
37 63. Jiang T, Li C, Duan B, et al. Risk factors for and management of ischemic-type biliary  
38 lesions following orthotopic liver transplantation: A single center experience. *Ann Hepatol*  
39 2016;15(1):41-46 doi: 10.5604/16652681.1184204published Online First.  
40  
41  
42 64. Jiang T, Liu S, Xiao X, et al. Diagnosis of rejection after liver transplantation: Use of  
43 phosphorus-31 magnetic resonance spectroscopy (31P-MRS). *Abdom Imaging* 2012;37(5):788-  
44 94 doi: 10.1007/s00261-008-9451-1published Online First.  
45  
46  
47 65. Jiang Z, Chen Y, Feng X, et al. Recipient cytotoxic T lymphocyte antigen 4 +49 single-  
48 nucleotide polymorphism is not associated with acute rejection after liver transplantation in  
49 Chinese population. *Int J Med Sci* 2013;10(3):250-54 doi: 10.7150/ijms.5511published Online  
50 First.  
51  
52  
53  
54  
55  
56  
57  
58  
59  
60

- 1  
2  
3 66. Jiang Z, Feng X, Zhang W, et al. Recipient cytotoxic T lymphocyte antigen-4 +49 G/G  
4 genotype is associated with reduced incidence of hepatitis B virus recurrence after liver  
5 transplantation among Chinese patients. *Liver International* 2007;27(9):1202-08 doi:  
6 10.1111/j.1478-3231.2007.01553.xpublished Online First.  
7  
8  
9  
10 67. Jiao ZY, Jiao Z. Prophylaxis of Recurrent Hepatitis B in Chinese Patients After Liver  
11 Transplantation Using Lamivudine Combined With Hepatitis B Immune Globulin According to  
12 the Titer of Antibody to Hepatitis B Surface Antigen. *Transplant Proc* 2007;39(5):1533-36 doi:  
13 10.1016/j.transproceed.2007.03.062published Online First.  
14  
15  
16 68. Jin R, Duan H, Zhao C, et al. Pharmacokinetics of Cyclosporine A in Chinese heart  
17 transplant recipients. *Immunopharmacol Immunotoxicol* 2012;34(3):519-22 doi:  
18 10.3109/08923973.2011.613400published Online First.  
19  
20  
21 69. Jin Z, Zhang WX, Chen B, et al. Stepwise regression analysis of the determinants of  
22 blood tacrolimus concentrations in Chinese patients with liver transplant. *Medicinal Chemistry*  
23 2009;5(3):301-04 doi: 10.2174/157340609788185918published Online First.  
24  
25  
26 70. Ju W, Chen M, Guo Z, et al. Allografts positive for hepatitis B surface antigen in liver  
27 transplant for disease related to hepatitis B virus. *Exp Clin Transplant* 2013;11(3):245-49 doi:  
28 10.6002/ect.2012.0095published Online First.  
29  
30  
31 71. Ju WQ, Guo ZY, Liang WH, et al. Sirolimus conversion in liver transplant recipients  
32 with calcineurin inhibitor-induced complications: Efficacy and safety. *Exp Clin Transplant*  
33 2012;10(2):132-35 doi: 10.6002/ect.2010.0126published Online First.  
34  
35  
36 72. Ju WQ, Guo ZY, Ling X, et al. Twenty-four hour steroid avoidance immunosuppressive  
37 regimen in liver transplant recipients. *Exp Clin Transplant* 2012;10(3):258-62 doi:  
38 10.6002/ect.2010.0127published Online First.  
39  
40  
41 73. Kong HY, Huang SQ, Zhu SM, et al. Role of anhepatic time in endothelial-related  
42 coagulation in liver transplantation. *Minerva Anesthesiol* 2013;79(4):391-97 Online First.  
43  
44  
45 74. Kong HY, Wen XH, Huang SQ, et al. Epsilon-aminocaproic acid improves  
46 postrecirculation hemodynamics by reducing intraliver activated protein C consumption in  
47 orthotopic liver transplantation. *World J Surg* 2014;38(1):177-85 doi: 10.1007/s00268-013-2282-  
48 4published Online First.  
49  
50  
51  
52  
53  
54  
55  
56  
57  
58  
59  
60

- 1  
2  
3 75. Lai MC, Yang Z, Zhou L, et al. Long non-coding RNA MALAT-1 overexpression  
4 predicts tumor recurrence of hepatocellular carcinoma after liver transplantation. *Med Oncol*  
5 2012;29(3):1810-16 doi: 10.1007/s12032-011-0004-zpublished Online First.  
6  
7  
8 76. Lei J, Yan L. Outcome Comparisons Among the Hangzhou, Chengdu, and UCSF Criteria  
9 for Hepatocellular Carcinoma Liver Transplantation after Successful Downstaging Therapies. *J*  
10 *Gastrointest Surg* 2013;17(6):1116-22 doi: 10.1007/s11605-013-2140-6published Online First.  
11  
12  
13 77. Lei JY, Wang WT, Yan LN. Hangzhou criteria for liver transplantation in hepatocellular  
14 carcinoma: A single-center experience. *Eur J Gastroenterol Hepatol* 2014;26(2):200-04 doi:  
15 10.1097/MEG.0b013e3283652b66published Online First.  
16  
17  
18 78. Lei JY, Yan LN, Zhu JQ, et al. Hepatocellular Carcinoma Patients May Benefit from  
19 Postoperative Huaier Aqueous Extract after Liver Transplantation. *Transplant Proc*  
20 2015;47(10):2920-24 doi: 10.1016/j.transproceed.2015.10.045published Online First.  
21  
22  
23 79. Li C, Zhang F, Zhang W, et al. Feasibility of 125I brachytherapy combined with  
24 sorafenib treatment in patients with multiple lung metastases after liver transplantation for  
25 hepatocellular carcinoma. *J Cancer Res Clin Oncol* 2010;136(11):1633-40 doi: 10.1007/s00432-  
26 010-0821-zpublished Online First.  
27  
28  
29 80. Li C, Zhu WJ, Wen TF, et al. Child-Pugh A Hepatitis B-Related Cirrhotic Patients with a  
30 Single Hepatocellular Carcinoma Up to 5 cm: Liver Transplantation vs. Resection. *J Gastrointest*  
31 *Surg* 2014;18(8):1469-76 doi: 10.1007/s11605-014-2550-0published Online First.  
32  
33  
34 81. Li D, Lu W, Zhu JY, et al. Population pharmacokinetics of tacrolimus and CYP3A5,  
35 MDR1 and IL-10 polymorphisms in adult liver transplant patients. *J Clin Pharm Ther*  
36 2007;32(5):505-15 doi: 10.1111/j.1365-2710.2007.00850.xpublished Online First.  
37  
38  
39 82. Li D, Zhu JY, Gao J, et al. Polymorphisms of tumor necrosis factor- $\alpha$ , interleukin-10,  
40 cytochrome P450 3A5 and ABCB1 in Chinese liver transplant patients treated with  
41 immunosuppressant tacrolimus. *Clin Chim Acta* 2007;383(1-2):133-39 doi:  
42 10.1016/j.cca.2007.05.008published Online First.  
43  
44  
45 83. Li F, Yang M, Li B, et al. Initial clinical results of orthotopic liver transplantation for  
46 hepatic alveolar echinococcosis. *Liver Transpl* 2007;13(6):924-26 doi:  
47 10.1002/lt.21187published Online First.  
48  
49  
50  
51  
52  
53  
54  
55  
56  
57  
58  
59  
60

- 1  
2  
3 84. Li H, He JW, Fu BS, et al. Immunosuppressant-related hip pain after orthotopic liver  
4 transplant. *Exp Clin Transplant* 2013;11(1):32-38 doi: 10.6002/ect.2012.0026published Online  
5 First.  
6  
7  
8 85. Li H, Li B, Wei Y, et al. Preoperative transarterial chemoembolization does not increase  
9 hepatic artery complications after liver transplantation: A single center 12-year experience.  
10 *Clinics and Research in Hepatology and Gastroenterology* 2015;39(4):451-57 doi:  
11 10.1016/j.clinre.2014.12.004published Online First.  
12  
13  
14  
15 86. Li H, Li J, Wang Y, et al. Proteomic analysis of effluents from perfused human heart for  
16 transplantation: Identification of potential biomarkers for ischemic heart damage. *Proteome*  
17 *Science* 2012;10(1) doi: 10.1186/1477-5956-10-21published Online First.  
18  
19  
20  
21  
22 87. Li H, Wang S, Wang G, et al. Yes-associated protein expression is a predictive marker  
23 for recurrence of hepatocellular carcinoma after liver transplantation. *Dig Surg* 2014;31(6):468-  
24 78 doi: 10.1159/000370252published Online First.  
25  
26  
27 88. Li H, Xie HY, Zhou L, et al. Copy number variation in CCL3L1 gene is associated with  
28 susceptibility to acute rejection in patients after liver transplantation. *Clin Transplant*  
29 2012;26(2):314-21 doi: 10.1111/j.1399-0012.2011.01486.xpublished Online First.  
30  
31  
32 89. Li J, Liu B, Yan LN, et al. Reversal of Graft Steatosis After Liver Transplantation:  
33 Prospective Study. *Transplant Proc* 2009;41(9):3560-63 doi:  
34 10.1016/j.transproceed.2009.06.222published Online First.  
35  
36  
37 90. Li MR, Chen GH, Cai CJ, et al. High hepatitis B virus DNA level in serum before liver  
38 transplantation increases the risk of hepatocellular carcinoma recurrence. *Digestion*  
39 2011;84(2):134-41 doi: 10.1159/000324197published Online First.  
40  
41  
42  
43 91. Li Q, Yao G, Ge Q, et al. Relevant risk factors affecting time of ventilation during early  
44 postoperative period after orthotopic liver transplantation. *J Crit Care* 2010;25(2):221-24 doi:  
45 10.1016/j.jcrc.2009.06.048published Online First.  
46  
47  
48 92. Li QY, Qin YS, Ling Q, et al. No therapeutic ERCP in anastomotic stricture without  
49 intrahepatic biliary dilation after liver transplantation. *Hepatogastroenterology*  
50 2011;58(109):1127-31 doi: 10.5754/hge11268published Online First.  
51  
52  
53  
54  
55  
56  
57  
58  
59  
60



- 1  
2  
3 93. Li RD, Sun Z, Dong JY, et al. A quantitative assessment model of T-cell immune  
4 function for predicting risks of infection and rejection during the early stage after liver  
5 transplantation. *Clin Transplant* 2013;27(5):666-72 doi: 10.1111/ctr.12187published Online First.  
6  
7  
8 94. Li T, Chen ZS, Zeng FJ, et al. Impact of early biliary complications in liver  
9 transplantation in the presence or absence of a T-tube: A Chinese transplant centre experience.  
10 *Postgrad Med J* 2007;83(976):120-23 doi: 10.1136/pgmj.2006.049171published Online First.  
11  
12  
13 95. Li WX, Li Z, Gao PJ, et al. Histological differentiation predicts post-liver transplantation  
14 survival time. *Clinics and Research in Hepatology and Gastroenterology* 2014;38(2):201-08 doi:  
15 10.1016/j.clinre.2013.11.002published Online First.  
16  
17  
18 96. Li X, Li X, Chi X, et al. Ulinastatin ameliorates acute kidney injury following liver  
19 transplantation in rats and humans. *Exp Ther Med* 2015;9(2):411-16 doi:  
20 10.3892/etm.2014.2088published Online First.  
21  
22  
23 97. Li Y, Shi Y, Chen J, et al. Association of polymorphisms in interleukin-18 and  
24 interleukin-28b with hepatitis b recurrence after liver transplantation in chinese han population.  
25 *Int J Immunogenet* 2012;39(4):346-52 doi: 10.1111/j.1744-313X.2012.01097.xpublished Online  
26 First.  
27  
28  
29 98. Li Y, Zhu M, Xia Q, et al. Urinary neutrophil gelatinase-associated lipocalin and L-type  
30 fatty acid binding protein as diagnostic markers of early acute kidney injury after liver  
31 transplantation. *Biomarkers* 2012;17(4):336-42 doi: 10.3109/1354750X.2012.672458published  
32 Online First.  
33  
34  
35 99. Li Y, Zou Y, Cai B, et al. The associations of IL-18 serum levels and promoter  
36 polymorphism with tacrolimus pharmacokinetics and hepatic allograft dysfunction in Chinese  
37 liver transplantation recipients. *Gene* 2012;491(2):251-55 doi:  
38 10.1016/j.gene.2011.10.008published Online First.  
39  
40  
41 100. Liang TB, Bai XL, Li DL, et al. Early Postoperative Hemorrhage Requiring Urgent  
42 Surgical Reintervention After Orthotopic Liver Transplantation. *Transplant Proc*  
43 2007;39(5):1549-53 doi: 10.1016/j.transproceed.2007.01.080published Online First.  
44  
45  
46 101. Liang TB, Li DL, Liang L, et al. Intraoperative blood salvage during liver transplantation  
47 in patients with hepatocellular carcinoma: Efficiency of leukocyte depletion filters in the removal  
48 of tumor cells. *Transplantation* 2008;85(6):863-69 doi: 10.1097/TP.0b013e3181671f2epublished  
49 Online First.  
50  
51  
52  
53  
54  
55  
56  
57  
58  
59

- 1  
2  
3 102. Liang TB, Li JJ, Li DL, et al. Intraoperative blood salvage and leukocyte depletion during  
4 liver transplantation with bacterial contamination. *Clin Transplant* 2010;24(2):265-72 doi:  
5 10.1111/j.1399-0012.2009.01091.xpublished Online First.  
6  
7  
8 103. Lianghui G, Shusen Z, Tingbo L, et al. Deferred versus prophylactic therapy with  
9 gancyclovir for cytomegalovirus in allograft liver transplantation. *Transplant Proc*  
10 2004;36(5):1502-05 doi: 10.1016/j.transproceed.2004.04.079published Online First.  
11  
12  
13 104. Lin MJ, Yang YL, Yu Q, et al. Value of percutaneous transhepatic cholangioscopy in the  
14 treatment of biliary cast after liver transplantation. *Int J Clin Exp Med* 2016;9(2):1263-71 Online  
15 First.  
16  
17  
18 105. Ling Q, Xie H, Lu D, et al. Association between donor and recipient TCF7L2 gene  
19 polymorphisms and the risk of new-onset diabetes mellitus after liver transplantation in a Han  
20 Chinese population. *J Hepatol* 2013;58(2):271-77 doi: 10.1016/j.jhep.2012.09.025published  
21 Online First.  
22  
23  
24 106. Ling Q, Xu X, Li J, et al. A new serum cystatin C-based equation for assessing  
25 glomerular filtration rate in liver transplantation. *Clin Chem Lab Med* 2008;46(3):405-10 doi:  
26 10.1515/CCLM.2008.052published Online First.  
27  
28  
29 107. Ling Q, Xu X, Wang K, et al. Donor PPAR $\gamma$  Gene Polymorphisms Influence the  
30 Susceptibility to Glucose and Lipid Disorders in Liver Transplant Recipients. *Medicine (United*  
31 *States)* 2015;94(35):e1421 doi: 10.1097/MD.0000000000001421published Online First.  
32  
33  
34 108. Ling Q, Xu X, Wei Q, et al. Downgrading MELD improves the outcomes after liver  
35 transplantation in patients with acute-on-chronic hepatitis B liver failure. *PLoS One* 2012;7(1)  
36 doi: 10.1371/journal.pone.0030322published Online First.  
37  
38  
39 109. Ling Q, Xu X, Wei Q, et al. Impact of preexisting diabetes mellitus on outcome after  
40 liver transplantation in patients with hepatitis B virus-related liver disease. *Dig Dis Sci*  
41 2011;56(3):889-93 doi: 10.1007/s10620-010-1358-3published Online First.  
42  
43  
44 110. Liu B, Teng F, Fu H, et al. Excessive intraoperative blood loss independently predicts  
45 recurrence of hepatocellular carcinoma after liver transplantation. *BMC Gastroenterol* 2015;15(1)  
46 doi: 10.1186/s12876-015-0364-5published Online First.  
47  
48  
49  
50  
51  
52  
53  
54  
55  
56  
57  
58  
59  
60

- 1  
2  
3 111. Liu C, Shang YF, Zhang XF, et al. Co-administration of grapefruit juice increases  
4 bioavailability of tacrolimus in liver transplant patients: A prospective study. *Eur J Clin*  
5 *Pharmacol* 2009;65(9):881-85 doi: 10.1007/s00228-009-0702-zpublished Online First.  
6  
7  
8 112. Liu CZ, Hu SY, Jin B, et al. Hemodialysis-induced hyperglycemia after liver  
9 transplantation. *Hepatogastroenterology* 2008;55(88):2175-77 Online First.  
10  
11  
12 113. Liu D, Huang P, Li X, et al. Using inflammatory and oxidative biomarkers in urine to  
13 predict early acute kidney injury in patients undergoing liver transplantation. *Biomarkers*  
14 2014;19(5):424-29 doi: 10.3109/1354750X.2014.924997published Online First.  
15  
16  
17  
18 114. Liu D, Luo G, Luo C, et al. Changes in the concentrations of mediators of inflammation  
19 and oxidative stress in exhaled breath condensate during liver transplantation and their relations  
20 with postoperative ARDS. *Respir Care* 2015;60(5):679-88 doi: 10.4187/respcare.03311published  
21 Online First.  
22  
23  
24 115. Liu J, Yan J, Wan Q, et al. The risk factors for tuberculosis in liver or kidney transplant  
25 recipients. *BMC Infect Dis* 2014;14(1) doi: 10.1186/1471-2334-14-387published Online First.  
26  
27  
28  
29 116. Liu S, Fan J, Wang X, et al. Intraoperative Cryoprecipitate Transfusion and Its  
30 Association with the Incidence of Biliary Complications after Liver Transplantation-A  
31 Retrospective Cohort Study. *PLoS One* 2013;8(5) doi: 10.1371/journal.pone.0060727published  
32 Online First.  
33  
34  
35 117. Liu S, Wang X, Lu Y, et al. The effects of intraoperative cryoprecipitate transfusion on  
36 acute renal failure following orthotopic liver transplantation. *Hepatology International*  
37 2013;7(3):901-09 doi: 10.1007/s12072-013-9457-9published Online First.  
38  
39  
40  
41 118. Liu S, Xing T, Sheng T, et al. The reduction rate of serum C3 following liver  
42 transplantation is an effective predictor of non-anastomotic strictures. *Hepatology International*  
43 2014;8(2):293-300 doi: 10.1007/s12072-014-9524-xpublished Online First.  
44  
45  
46 119. Liu XX, Xu BM, Chen H, et al. Limited Sampling Strategy for the Estimation of  
47 Tacrolimus Area under the Concentration-Time Curve in Chinese Adult Liver Transplant  
48 Patients. *Pharmacology* 2016;98(5-6):229-41 doi: 10.1159/000445896published Online First.  
49  
50  
51 120. Liu ZN, Wang WT, Yan LN. De Novo Malignancies after Liver Transplantation with 14  
52 Cases at a Single Center. *Transplant Proc* 2015;47(8):2483-87 doi:  
53 10.1016/j.transproceed.2015.08.008published Online First.  
54  
55  
56  
57  
58  
59

- 1  
2  
3  
4  
5 121. Lu D, Xu X, Wang J, et al. The influence of a contemporaneous portal and hepatic artery  
6 revascularization protocol on biliary complications after liver transplantation. *Surgery (United*  
7 *States)* 2014;155(1):190-95 doi: 10.1016/j.surg.2013.06.056published Online First.  
8  
9  
10 122. Lu H, He J, Wu Z, et al. Assessment of Microbiome Variation During the Perioperative  
11 Period in Liver Transplant Patients: A Retrospective Analysis. *Microb Ecol* 2013;65(3):781-91  
12 doi: 10.1007/s00248-013-0211-6published Online First.  
13  
14  
15 123. Lu NN, Huang Q, Wang JF, et al. Non-anastomotic biliary strictures following orthotopic  
16 liver transplantation: Treatment with percutaneous transhepatic biliary drainage.  
17 *Hepatogastroenterology* 2012;59(120):2569-72 doi: 10.5754/hge12300published Online First.  
18  
19  
20 124. Lu Q, Zhong XF, Huang ZX, et al. Role of contrast-enhanced ultrasound in decision  
21 support for diagnosis and treatment of hepatic artery thrombosis after liver transplantation. *Eur J*  
22 *Radiol* 2012;81(3):e338-e43 doi: 10.1016/j.ejrad.2011.11.015published Online First.  
23  
24  
25 125. Luo A, Wan Q, Ye Q, et al. The clinical manifestations and distribution and resistance of  
26 pathogens among liver transplantation with infections caused by non - Fermenters: A clinical  
27 analysis of 31 patients. *Hepatogastroenterology* 2014;61(136):2349-52 doi:  
28 10.5754/hge14849published Online First.  
29  
30  
31  
32 126. Luo A, Zhong Z, Wan Q, et al. The distribution and resistance of pathogens among solid  
33 organ transplant recipients with *Pseudomonas aeruginosa* infections. *Med Sci Monit*  
34 2016;22:1124-30 doi: 10.12659/MSM.896026published Online First.  
35  
36  
37 127. Luo YL, Yang XL, Cui JB, et al. Health-related quality of life of liver transplant  
38 recipients: A single center experience. *Hepatogastroenterology* 2012;59(118):1947-50 doi:  
39 10.5754/hge12008published Online First.  
40  
41  
42  
43 128. Lv Z, Cai X, Weng X, et al. Tumor-stroma ratio is a prognostic factor for survival in  
44 hepatocellular carcinoma patients after liver resection or transplantation. *Surgery (United States)*  
45 2015;158(1):142-50 doi: 10.1016/j.surg.2015.02.013published Online First.  
46  
47  
48 129. Lv Z, Weng X, Du C, et al. Downregulation of HDAC6 promotes angiogenesis in  
49 hepatocellular carcinoma cells and predicts poor prognosis in liver transplantation patients. *Mol*  
50 *Carcinog* 2016;55(5):1024-33 doi: 10.1002/mc.22345published Online First.  
51  
52  
53  
54  
55  
56  
57  
58  
59

- 1  
2  
3 130. Lyu SQ, Ren J, Zheng RQ, et al. Contrast-enhanced sonography for diagnosing collateral  
4 transformation of the hepatic artery after liver transplantation. *J Ultrasound Med*  
5 2015;34(9):1591-98 doi: 10.7863/ultra.15.14.08079published Online First.  
6  
7  
8 131. Mao W, Chen J, Zheng M, et al. Initial experience of lung transplantation at a single  
9 center in China. *Transplant Proc* 2013;45(1):349-55 doi:  
10 10.1016/j.transproceed.2012.02.045published Online First.  
11  
12  
13 132. Mao W, Hu Y, Lou Y, et al. Immature platelet fraction values predict recovery of platelet  
14 counts following liver transplantation. *Clinics and Research in Hepatology and Gastroenterology*  
15 2015;39(4):469-74 doi: 10.1016/j.clinre.2014.11.008published Online First.  
16  
17  
18 133. Mao WJ, Chen JY, Zheng MF, et al. Lung transplantation for end-stage silicosis. *J Occup*  
19 *Environ Med* 2011;53(8):845-49 doi: 10.1097/JOM.0b013e3182260e50published Online First.  
20  
21  
22  
23 134. Men TY, Wang JN, Li H, et al. Prevalence of multidrug-resistant gram-negative bacilli  
24 producing extended-spectrum  $\beta$ -lactamases (ESBLs) and ESBL genes in solid organ transplant  
25 recipients. *Transpl Infect Dis* 2013;15(1):14-21 doi: 10.1111/tid.12001published Online First.  
26  
27  
28 135. Minmin S, Zhidong G, Hao C, et al. Correlation between pharmacokinetics and  
29 pharmacodynamics of mycophenolic acid in liver transplant patients. *J Clin Pharmacol*  
30 2010;50(12):1388-96 doi: 10.1177/0091270009359526published Online First.  
31  
32  
33 136. Mu HJ, Xie P, Chen JY, et al. Association of TNF- $\alpha$ , TGF- $\beta$ 1, IL-10, IL-6, and IFN- $\gamma$   
34 gene polymorphism with acute rejection and infection in lung transplant recipients. *Clin*  
35 *Transplant* 2014;28(9):1016-24 doi: 10.1111/ctr.12411published Online First.  
36  
37  
38 137. Niu YJ, Shen ZY, Xu C, et al. Establishment of tacrolimus-induced diabetes in rat model  
39 and assessment of clinical treatments for post-transplant diabetes mellitus in liver transplant  
40 recipients. *Clinical Laboratory* 2013;59(7-8):869-74 doi:  
41 10.7754/Clin.Lab.2012.120913published Online First.  
42  
43  
44 138. Pan C, Shi Y, Zhang JJ, et al. Single-Center Experience of 253 Portal Vein Thrombosis  
45 Patients Undergoing Liver Transplantation in China. *Transplant Proc* 2009;41(9):3761-65 doi:  
46 10.1016/j.transproceed.2009.06.215published Online First.  
47  
48  
49 139. Pan C, Wang C, Pan W, et al. Usefulness of real-time three-dimensional  
50 echocardiography to quantify global left ventricular function and mechanical dyssynchrony after  
51 heart transplantation. *Acta Cardiol* 2011;66(3):365-70 doi: 10.2143/AC.66.3.2114137published  
52 Online First.  
53  
54  
55  
56  
57  
58  
59

- 1  
2  
3  
4  
5 140. Pan L, Zhang W, Zhang J, et al. The analysis of CD45 isoforms expression on HBV-  
6 specific T cells after liver transplantation. *Med Oncol* 2012;29(2):899-908 doi: 10.1007/s12032-  
7 011-9833-zpublished Online First.  
8  
9  
10 141. Pei F, Shang K, Jiang B, et al. Clinicopathologic study on complications of orthotopic  
11 liver transplantation in 54 patients with chronic hepatitis B viral infection. *Hepatology*  
12 *International* 2013;7(2):468-76 doi: 10.1007/s12072-013-9422-7published Online First.  
13  
14  
15 142. Qin J, Fang Y, Dong Y, et al. Radiological and clinical findings of 25 patients with  
16 invasive pulmonary aspergillosis: Retrospective analysis of 2150 liver transplantation cases. *Br J*  
17 *Radiol* 2012;85(1016):e429-e35 doi: 10.1259/bjr/39784231published Online First.  
18  
19  
20 143. Qin J, Xu J, Dong Y, et al. High-resolution CT findings of pulmonary infections after  
21 orthotopic liver transplantation in 453 patients. *Br J Radiol* 2012;85(1019):e959-e65 doi:  
22 10.1259/bjr/26230943published Online First.  
23  
24  
25 144. Qin Z, Linghu EQ. New endoscopic classification system for biliary stricture after liver  
26 transplantation. *J Int Med Res* 2014;42(2):566-71 doi: 10.1177/0300060513507761published  
27 Online First.  
28  
29  
30  
31 145. Qiu Y, Zhu X, Wang W, et al. Nutrition Support With Glutamine Dipeptide in Patients  
32 Undergoing Liver Transplantation. *Transplant Proc* 2009;41(10):4232-37 doi:  
33 10.1016/j.transproceed.2009.08.076published Online First.  
34  
35  
36 146. Qu W, Zhu ZJ, Sun LY, et al. Salvage liver transplantation for hepatocellular carcinoma  
37 recurrence after primary liver resection. *Clinics and Research in Hepatology and*  
38 *Gastroenterology* 2015;39(1):93-97 doi: 10.1016/j.clinre.2014.07.006published Online First.  
39  
40  
41 147. Ran JH, Zhang SN, Liu J, et al. In-hospital and follow-up outcomes of patients  
42 undergoing orthotopic liver transplantation after hepatic artery reconstruction with an iliac  
43 interposition graft. *Int J Clin Exp Med* 2016;9(2):3939-45 Online First.  
44  
45  
46  
47 148. Ren J, Lu MD, Zheng RQ, et al. Evaluation of the microcirculatory disturbance of biliary  
48 ischemia after liver transplantation with contrast-enhanced ultrasound: Preliminary experience.  
49 *Liver Transpl* 2009;15(12):1703-08 doi: 10.1002/lt.21910published Online First.  
50  
51  
52 149. Ren J, Zheng BW, Wang P, et al. Revealing Impaired Blood Supply to the Bile Ducts on  
53 Contrast-Enhanced Ultrasound: A Novel Diagnosis Method to Ischemic-Type Biliary Lesions  
54  
55  
56  
57  
58  
59  
60

- 1  
2  
3 After Orthotropic Liver Transplantation. *Ultrasound Med Biol* 2013;39(5):753-60 doi:  
4 10.1016/j.ultrasmedbio.2012.12.004published Online First.  
5  
6  
7 150. Sha J, Tao Y, Li D, et al. Outcome of heart transplantations done in our centre. *Ann*  
8 *Transplant* 2008;13(3):27-29 Online First.  
9  
10  
11 151. Shaoyin D, Yongmei Y, Tong S, et al. Follow-up examination of 12 heart transplant  
12 recipients with cardiac CT. *Clin Imaging* 2012;36(6):732-38 doi:  
13 10.1016/j.clinimag.2012.02.004published Online First.  
14  
15  
16 152. Shen JY, Li C, Wen TF, et al. Liver transplantation versus surgical resection for CC  
17 meeting the Milan criteria: A propensity score analysis. *Medicine (United States)* 2016;95(52)  
18 doi: 10.1097/MD.0000000000005756published Online First.  
19  
20  
21 153. Sheng H, Lu Y, Chen H. Ocular Complications of Heart Transplantation in a Chinese  
22 Population. *Transplant Proc* 2008;40(10):3590-93 doi:  
23 10.1016/j.transproceed.2008.06.081published Online First.  
24  
25  
26 154. Sheng L, Jun S, Jianfeng L, et al. The effect of sirolimus-based immunosuppression vs.  
27 conventional prophylaxis therapy on cytomegalovirus infection after liver transplantation. *Clin*  
28 *Transplant* 2015;29(6):555-59 doi: 10.1111/ctr.12552published Online First.  
29  
30  
31 155. Shi SH, Kong HS, Xu J, et al. Multidrug resistant gram-negative bacilli as predominant  
32 bacteremic pathogens in liver transplant recipients. *Transpl Infect Dis* 2009;11(5):405-12 doi:  
33 10.1111/j.1399-3062.2009.00421.xpublished Online First.  
34  
35  
36 156. Shi Y, Li Y, Tang J, et al. Influence of CYP3A4, CYP3A5 and MDR-1 polymorphisms  
37 on tacrolimus pharmacokinetics and early renal dysfunction in liver transplant recipients. *Gene*  
38 2013;512(2):226-31 doi: 10.1016/j.gene.2012.10.048published Online First.  
39  
40  
41 157. Shi Z, Yan L, Zhao J, et al. Prevention and treatment of rethrombosis after liver  
42 transplantation with an implantable pump of the portal vein. *Liver Transpl* 2010;16(3):324-31  
43 doi: 10.1002/lt.21988published Online First.  
44  
45  
46 158. Song SH, Li XX, Wan QQ, et al. Risk factors for mortality in liver transplant recipients  
47 with ESKAPE infection. *Transplant Proc* 2014;46(10):3560-63 doi:  
48 10.1016/j.transproceed.2014.08.049published Online First.  
49  
50  
51 159. Su H, Liu Z, Sun Y, et al. Efficacy and safety of low accelerating dose regimen of  
52 interferon/ribavirin antiviral therapy in patients with hepatitis C virus recurrence after liver  
53  
54  
55  
56  
57  
58  
59

1  
2  
3 transplantation. *Ann Transplant* 2015;20:263-68 doi: 10.12659/AOT.892255published Online  
4 First.

5  
6  
7 160. Sun B, Li XY, Gao JW, et al. Population pharmacokinetic study of cyclosporine based on  
8 NONMEM in Chinese liver transplant recipients. *Ther Drug Monit* 2010;32(6):715-22 doi:  
9 10.1097/FTD.0b013e3181fb6ce3published Online First.

10  
11  
12 161. Sun H, Teng M, Liu J, et al. FOXM1 expression predicts the prognosis in hepatocellular  
13 carcinoma patients after orthotopic liver transplantation combined with the Milan criteria. *Cancer*  
14 *Lett* 2011;306(2):214-22 doi: 10.1016/j.canlet.2011.03.009published Online First.

15  
16  
17 162. Sun J, Cao G, Zhang L, et al. Human cytomegalovirus (CMV) UL97 D605E mutation has  
18 a higher prevalence in infants with primary CMV infection compared with transplant recipients  
19 with CMV recurrence. *Transplant Proc* 2012;44(10):3022-25 doi:  
20 10.1016/j.transproceed.2012.06.069published Online First.

21  
22  
23 163. Sun XY, Dong JH, Qin K, et al. Single center study on transplantation of livers donated  
24 after cardiac death: A report of 6 cases. *Exp Ther Med* 2016;11(3):988-92 doi:  
25 10.3892/etm.2016.3001published Online First.

26  
27  
28 164. Sun Y, Yin S, Xie H, et al. Immunophenotypic shift of memory CD8 T cells identifies the  
29 changes of immune status in the patients after liver transplantation. *Scand J Clin Lab Invest*  
30 2009;69(7):789-96 doi: 10.3109/00365510903268818published Online First.

31  
32  
33 165. Tu Z, Xiang P, Xu X, et al. DCD liver transplant infection: Experience from a single  
34 centre in China. *Int J Clin Pract* 2016;70:3-10 doi: 10.1111/ijcp.12810published Online First.

35  
36  
37 166. Vitale A, Cucchetti A, Qiao GL, et al. Is resectable hepatocellular carcinoma a  
38 contraindication to liver transplantation? A novel decision model based on "number of patients  
39 needed to transplant" as measure of transplant benefit. *J Hepatol* 2014;60(6):1165-71 doi:  
40 10.1016/j.jhep.2014.01.022published Online First.

41  
42  
43 167. Wan P, Xia Q, Zhang JJ, et al. Liver transplantation for hepatocellular carcinoma  
44 exceeding the Milan criteria: A single-center experience. *J Cancer Res Clin Oncol*  
45 2014;140(2):341-48 doi: 10.1007/s00432-013-1576-0published Online First.

46  
47  
48 168. Wan P, Zhang J, Long X, et al. Serum levels of preoperative  $\alpha$ -fetoprotein and CA19-9  
49 predict survival of hepatic carcinoma patients after liver transplantation. *Eur J Gastroenterol*  
50 *Hepatol* 2014;26(5):553-61 doi: 10.1097/MEG.000000000000070published Online First.



- 1  
2  
3 169. Wan Q, Ye Q, Su T, et al. The epidemiology and distribution of pathogens and risk  
4 factors for mortality in liver transplant recipients with gram negative bacteremia.  
5 Hepatogastroenterology 2014;61(134):1730-33 doi: 10.5754/hge14504published Online First.  
6  
7  
8 170. Wan QQ, Ye QF, Ming YZ, et al. The risk factors for mortality in deceased donor liver  
9 transplant recipients with bloodstream infections. Transplant Proc 2013;45(1):305-07 doi:  
10 10.1016/j.transproceed.2012.06.080published Online First.  
11  
12  
13 171. Wang B, He HK, Cheng B, et al. Effect of low central venous pressure on postoperative  
14 pulmonary complications in patients undergoing liver transplantation. Surg Today  
15 2013;43(7):777-81 doi: 10.1007/s00595-012-0419-ypublished Online First.  
16  
17  
18 172. Wang CM, Li X, Song S, et al. Newly designed y-configured single-catheter stenting for  
19 the treatment of hilar-type nonanastomotic biliary strictures after orthotopic liver transplantation.  
20 Cardiovasc Intervent Radiol 2012;35(1):184-89 doi: 10.1007/s00270-011-0214-ypublished  
21 Online First.  
22  
23  
24 173. Wang E, Nie Y, Zhao Q, et al. Circulating miRNAs reflect early myocardial injury and  
25 recovery after heart transplantation. J Cardiothorac Surg 2013;8(1) doi: 10.1186/1749-8090-8-  
26 165published Online First.  
27  
28  
29 174. Wang G, Yang J, Li M, et al. Liver transplant may improve erectile function in patients  
30 with benign end-stage liver disease: Single-center Chinese experience. Exp Clin Transplant  
31 2013;11(4):332-38 doi: 10.6002/ect.2012.0102published Online First.  
32  
33  
34 175. Wang GY, Jiang N, Yi HM, et al. Pretransplant elevated plasma fibrinogen level is a  
35 novel prognostic predictor for hepatocellular carcinoma recurrence and patient survival  
36 following liver transplantation. Ann Transplant 2016;21:125-30 doi:  
37 10.12659/AOT.895416published Online First.  
38  
39  
40 176. Wang GY, Yang Y, Li H, et al. A scoring model based on neutrophil to lymphocyte ratio  
41 predicts recurrence of HBV-associated hepatocellular carcinoma after liver transplantation. PLoS  
42 One 2011;6(9) doi: 10.1371/journal.pone.0025295published Online First.  
43  
44  
45 177. Wang J, Liu JJ, Liang YY, et al. Could diffusion-weighted imaging detect injured bile  
46 ducts of ischemic-type biliary lesions after orthotopic liver transplantation? American Journal of  
47 Roentgenology 2012;199(4):901-06 doi: 10.2214/AJR.11.8147published Online First.  
48  
49  
50  
51  
52  
53  
54  
55  
56  
57  
58  
59  
60

- 1  
2  
3 178. Wang J, Yang W, Huang Q, et al. Interventional treatment for portal venous occlusion  
4 after liver transplantation: Long-term follow-up results. *Medicine (United States)* 2015;94(4) doi:  
5 10.1097/MD.0000000000000356published Online First.  
6  
7  
8 179. Wang JF, Zhai RY, Wei BJ, et al. Percutaneous Intravascular Stents for Treatment of  
9 Portal Venous Stenosis After Liver Transplantation: Midterm Results. *Transplant Proc*  
10 2006;38(5):1461-62 doi: 10.1016/j.transproceed.2006.02.113published Online First.  
11  
12  
13  
14  
15 180. Wang K, Zhu ZJ, Zheng H, et al. Protective hepatitis B surface antibodies in blood and  
16 ascites fluid in the early stage after liver transplantation for hepatitis B diseases. *Hepatology*  
17 *Research* 2012;42(3):280-87 doi: 10.1111/j.1872-034X.2011.00926.xpublished Online First.  
18  
19  
20 181. Wang L, Li N, Wang MX, et al. Benefits of minimizing immunosuppressive dosage  
21 according to cytochrome P450 3A5 genotype in liver transplant patients: Findings from a single-  
22 center study. *Genetics and Molecular Research* 2015;14(2):3191-99 doi:  
23 10.4238/2015.April.10.31published Online First.  
24  
25  
26  
27 182. Wang P, Song W, Li H, et al. Association between donor and recipient smoothed gene  
28 polymorphisms and the risk of hepatocellular carcinoma recurrence following orthotopic liver  
29 transplantation in a Han Chinese population. *Tumor Biology* 2015;36(10):7807-15 doi:  
30 10.1007/s13277-015-3370-xpublished Online First.  
31  
32  
33  
34 183. Wang P, Wang C, Li H, et al. Impact of age on the prognosis after liver transplantation  
35 for patients with hepatocellular carcinoma: A single-center experience. *Onco Targets Ther*  
36 2015;8:3775-81 doi: 10.2147/OTT.S93939published Online First.  
37  
38  
39 184. Wang S, Li J, Xie A, et al. Dynamic changes in Th1, Th17, and FoxP3+ T cells in  
40 patients with acute cellular rejection after cardiac transplantation. *Clin Transplant*  
41 2011;25(2):E177-E86 doi: 10.1111/j.1399-0012.2010.01362.xpublished Online First.  
42  
43  
44 185. Wang SY, Tang HM, Chen GQ, et al. Effect of ursodeoxycholic acid administration after  
45 liver transplantation on serum liver tests and biliary complications: A randomized clinical trial.  
46 *Digestion* 2012;86(3):208-17 doi: 10.1159/000339711published Online First.  
47  
48  
49 186. Wang W, Ye Y, Wang T, et al. Prognostic prediction of male recipients selected for liver  
50 transplantation: With special attention to neutrophil to lymphocyte ratio. *Hepatology Research*  
51 2016;46(9):899-907 doi: 10.1111/hepr.12633published Online First.  
52  
53  
54  
55  
56  
57  
58  
59  
60

- 1  
2  
3 187. Wang WL, Jin J, Zheng SS, et al. Tacrolimus dose requirement in relation to donor and  
4 recipient ABCB1 and CYP3A5 gene polymorphisms in Chinese liver transplant patients. *Liver*  
5 *Transpl* 2006;12(5):775-80 doi: 10.1002/lt.20709published Online First.  
6  
7  
8 188. Wang Y, Liu Y, Han R, et al. Monitoring of CD95 and CD38 expression in peripheral  
9 blood T lymphocytes during active human cytomegalovirus infection after orthotopic liver  
10 transplantation. *Journal of Gastroenterology and Hepatology (Australia)* 2010;25(1):138-42 doi:  
11 10.1111/j.1440-1746.2009.05966.xpublished Online First.  
12  
13  
14  
15 189. Wang Y, Liu Y, Han R, et al. Temporal evolution of soluble Fas and Fas ligand in  
16 patients with orthotopic liver transplantation. *Cytokine* 2008;41(3):240-43 doi:  
17 10.1016/j.cyto.2007.11.010published Online First.  
18  
19  
20 190. Wang Y, Liu Y, Han R, et al. Hemostatic variation during perioperative period of  
21 orthotopic liver transplantation without venovenous bypass. *Thromb Res* 2008;122(2):161-66 doi:  
22 10.1016/j.thromres.2007.10.002published Online First.  
23  
24  
25 191. Wang Y, Liu Y, Zhang Y, et al. The role of the CD95, CD38 and TGF $\beta$ 1 during active  
26 human cytomegalovirus infection in liver transplantation. *Cytokine* 2006;35(3-4):193-99 doi:  
27 10.1016/j.cyto.2006.08.001published Online First.  
28  
29  
30  
31 192. Wang Y, Zhang M, Liu ZW, et al. The ratio of circulating regulatory T cells  
32 (Tregs)/Th17 cells is associated with acute allograft rejection in liver transplantation. *PLoS One*  
33 2014;9(11) doi: 10.1371/journal.pone.0112135published Online First.  
34  
35  
36 193. Wang YI, Li G, Zhang Y, et al. The Expression of von Willebrand Factor, Soluble  
37 Thrombomodulin, and Soluble P-Selectin During Orthotopic Liver Transplantation. *Transplant*  
38 *Proc* 2007;39(1):172-75 doi: 10.1016/j.transproceed.2006.10.027published Online First.  
39  
40  
41 194. Wang YL, Li G, Wu D, et al. Analysis of Alpha-fetoprotein mRNA Level on the Tumor  
42 Cell Hematogenous Spread of Patients With Hepatocellular Carcinoma Undergoing Orthotopic  
43 Liver Transplantation. *Transplant Proc* 2007;39(1):166-68 doi:  
44 10.1016/j.transproceed.2006.10.008published Online First.  
45  
46  
47  
48 195. Wang YL, Tang ZQ, Gao W, et al. Influence of Th1, Th2, and Th3 cytokines during the  
49 early phase after liver transplantation. *Transplant Proc* 2003;35(8):3024-25 doi:  
50 10.1016/j.transproceed.2003.10.007published Online First.  
51  
52  
53  
54  
55  
56  
57  
58  
59

- 1  
2  
3 196. Wang YL, Zhang YY, Zhou YL, et al. T-helper and T-cytotoxic cell subsets monitoring  
4 during active cytomegalovirus infection in liver transplantation. *Transplant Proc*  
5 2004;36(5):1498-99 doi: 10.1016/j.transproceed.2004.05.032published Online First.  
6  
7  
8 197. Wang Z, He JJ, Liu XY, et al. The evaluation of enteric-coated mycophenolate sodium in  
9 cardiac deceased donor liver transplant patients in China. *Immunopharmacol Immunotoxicol*  
10 2015;37(6):508-12 doi: 10.3109/08923973.2015.1096286published Online First.  
11  
12  
13 198. Wang Z, Liao J, Wu S, et al. Recipient C6 rs9200 genotype is associated with  
14 hepatocellular carcinoma recurrence after orthotopic liver transplantation in a Han Chinese  
15 population. *Cancer Gene Ther* 2016;23(6):157-61 doi: 10.1038/cgt.2016.7published Online First.  
16  
17  
18 199. Wang Z, Shi B, Jin H, et al. Low-dose of tacrolimus favors the induction of functional  
19 CD4+CD25+FoxP3+ regulatory T cells in solid-organ transplantation. *Int Immunopharmacol*  
20 2009;9(5):564-69 doi: 10.1016/j.intimp.2009.01.029published Online First.  
21  
22  
23 200. Wang Z, Wu S, Chen D, et al. Influence of TLR4 rs1927907 locus polymorphisms on  
24 tacrolimus pharmacokinetics in the early stage after liver transplantation. *Eur J Clin Pharmacol*  
25 2014;70(8):925-31 doi: 10.1007/s00228-014-1673-2published Online First.  
26  
27  
28 201. Wang ZX, Song SH, Teng F, et al. A single-center retrospective analysis of liver  
29 transplantation on 255 patients with hepatocellular carcinoma. *Clin Transplant* 2010;24(6):752-  
30 57 doi: 10.1111/j.1399-0012.2009.01172.xpublished Online First.  
31  
32  
33 202. Wang ZX, Yan LN, Wang WT, et al. Impact of Pretransplant MELD Score on  
34 Posttransplant Outcome in Orthotopic Liver Transplantation for Patients with Acute-on-Chronic  
35 Hepatitis B Liver Failure. *Transplant Proc* 2007;39(5):1501-04 doi:  
36 10.1016/j.transproceed.2007.02.070published Online First.  
37  
38  
39 203. Wei Q, Xu X, Wang C, et al. Efficacy and safety of a steroid-free immunosuppressive  
40 regimen after liver transplantation for hepatocellular carcinoma. *Gut and Liver* 2016;10(4):604-  
41 10 doi: 10.5009/gnl15017published Online First.  
42  
43  
44 204. Wei Y, Zhang L, Lin H, et al. Factors Related to Post-Liver Transplantation Acute Renal  
45 Failure. *Transplant Proc* 2006;38(9):2982-84 doi: 10.1016/j.transproceed.2006.08.156published  
46 Online First.  
47  
48  
49 205. Wen O, Li X, Wan Q, et al. The risk factors for mortality and septic shock in liver  
50 transplant recipients with ESKAPE bacteremia. *Hepatogastroenterology* 2015;62(138):246-49  
51 doi: 10.5754/hge14092published Online First.  
52  
53  
54  
55  
56  
57  
58  
59  
60

- 1  
2  
3  
4  
5 206. Wu B, Wu H, Chen J, et al. Comparative proteomic analysis of human donor tissues  
6 during orthotopic liver transplantation: Ischemia versus reperfusion. *Hepatology International*  
7 2013;7(1):286-98 doi: 10.1007/s12072-012-9346-7published Online First.  
8  
9  
10 207. Wu CZ, Ni XJ, Zheng SL, et al. A fast SSP-PCR method for genotyping the ATP-binding  
11 cassette subfamily B member 1 gene C3435T and G2677T polymorphisms in Chinese transplant  
12 recipients. *Tumori* 2009;95(3):338-42 Online First.  
13  
14  
15 208. Wu J, Xu X, Liang T, et al. Long-term outcome of combined liver-kidney transplantation:  
16 A single-center experience in China. *Hepatogastroenterology* 2008;55(82-83):334-37 Online  
17 First.  
18  
19  
20 209. Wu J, Zhu SM, He HL, et al. Plasma propofol concentrations during orthotopic liver  
21 transplantation. *Acta Anaesthesiol Scand* 2005;49(6):804-10 doi: 10.1111/j.1399-  
22 6576.2005.00671.xpublished Online First.  
23  
24  
25 210. Wu L, Chen L, Zhou L, et al. Association of interleukin 18 gene promoter  
26 polymorphisms with HBV recurrence after liver transplantation in Han Chinese population.  
27 *Hepatitis Monthly* 2011;11(6):469-74 Online First.  
28  
29  
30  
31 211. Wu L, Hu A, Tam N, et al. Salvage liver transplantation for patients with recurrent  
32 hepatocellular carcinoma after curative resection. *PLoS One* 2012;7(7) doi:  
33 10.1371/journal.pone.0041820published Online First.  
34  
35  
36 212. Wu L, Tam N, Deng R, et al. Steroid-resistant acute rejection after cadaveric liver  
37 transplantation: Experience from one single center. *Clinics and Research in Hepatology and*  
38 *Gastroenterology* 2014;38(5):592-97 doi: 10.1016/j.clinre.2014.04.005published Online First.  
39  
40  
41 213. Wu L, Xu X, Shen J, et al. MDR1 gene polymorphisms and risk of recurrence in patients  
42 with hepatocellular carcinoma after liver transplantation. *J Surg Oncol* 2007;96(1):62-68 doi:  
43 10.1002/jso.20774published Online First.  
44  
45  
46 214. Wu L, Zhang J, Guo Z, et al. Diagnosis and treatment of acute appendicitis after  
47 orthotopic liver transplant in adults. *Exp Clin Transplant* 2011;9(2):113-17 Online First.  
48  
49  
50 215. Wu L, Zhang J, Guo Z, et al. Hepatic artery thrombosis after orthotopic liver transplant:  
51 A review of the same institute 5 years later. *Exp Clin Transplant* 2011;9(3):191-96 Online First.  
52  
53  
54  
55  
56  
57  
58  
59

- 1  
2  
3 216. Wu LM, Xie HY, Zhou L, et al. A Single Nucleotide Polymorphism in the Vascular  
4 Endothelial Growth Factor Gene Is Associated with Recurrence of Hepatocellular Carcinoma  
5 after Transplantation. *Arch Med Res* 2009;40(7):565-70 doi:  
6 10.1016/j.arcmed.2009.07.011published Online First.  
7  
8  
9  
10 217. Wu LM, Yang Z, Zhou L, et al. Identification of histone deacetylase 3 as a biomarker for  
11 tumor recurrence following liver transplantation in HBV-associated hepatocellular carcinoma.  
12 *PLoS One* 2010;5(12) doi: 10.1371/journal.pone.0014460published Online First.  
13  
14  
15 218. Wu LM, Zhang F, Xie HY, et al. MMP2 promoter polymorphism (C-1306T) and risk of  
16 recurrence in patients with hepatocellular carcinoma after transplantation. *Clin Genet*  
17 2008;73(3):273-78 doi: 10.1111/j.1399-0004.2007.00955.xpublished Online First.  
18  
19  
20 219. Wu LM, Zhang F, Zhou L, et al. Predictive value of CpG island methylator phenotype for  
21 tumor recurrence in hepatitis B virus-associated hepatocellular carcinoma following liver  
22 transplantation. *BMC Cancer* 2010;10 doi: 10.1186/1471-2407-10-399published Online First.  
23  
24  
25 220. Wu Y, Cai B, Tang J, et al. Tacrolimus may induce the production of nucleolar anti-  
26 nuclear antibody in liver transplant patients. *J Gastrointest Liver Dis* 2011;20(3):267-70 Online  
27 First.  
28  
29  
30  
31 221. Wu ZW, Lu HF, Wu J, et al. Assessment of the Fecal Lactobacilli Population in Patients  
32 with Hepatitis B Virus-Related Decompensated Cirrhosis and Hepatitis B Cirrhosis Treated with  
33 Liver Transplant. *Microb Ecol* 2012;63(4):929-37 doi: 10.1007/s00248-011-9945-1published  
34 Online First.  
35  
36  
37  
38 222. Xia D, Yan LN, Li B, et al. Orthotopic liver transplantation for incurable alveolar  
39 echinococcosis: Report of five cases from west China. *Transplant Proc* 2005;37(5):2181-84 doi:  
40 10.1016/j.transproceed.2005.03.111published Online First.  
41  
42  
43 223. Xia D, Yan LN, Xu L, et al. Postoperative Severe Pneumonia in Adult Liver Transplant  
44 Recipients. *Transplant Proc* 2006;38(9):2974-78 doi:  
45 10.1016/j.transproceed.2006.08.184published Online First.  
46  
47  
48 224. Xia W, Ke Q, Wang Y, et al. Donation after cardiac death liver transplantation: Graft  
49 quality evaluation based on pretransplant liver biopsy. *Liver Transpl* 2015;21(6):838-46 doi:  
50 10.1002/lt.24123published Online First.  
51  
52  
53  
54  
55  
56  
57  
58  
59  
60

- 1  
2  
3 225. Xia W, Ke Q, Wang Y, et al. Predictive value of pre-transplant platelet to lymphocyte  
4 ratio for hepatocellular carcinoma recurrence after liver transplantation. *World J Surg Oncol*  
5 2015;13(1) doi: 10.1186/s12957-015-0472-2published Online First.  
6  
7  
8 226. Xia ZW, Jun CY, Hao C, et al. The occurrence of diarrhea not related to the  
9 pharmacokinetics of MPA and its metabolites in liver transplant patients. *Eur J Clin Pharmacol*  
10 2010;66(7):671-79 doi: 10.1007/s00228-010-0833-2published Online First.  
11  
12  
13 227. Xiao L, Fu ZR, Ding GS, et al. Liver Transplantation for Hepatitis B Virus-Related  
14 Hepatocellular Carcinoma: One Center's Experience in China. *Transplant Proc* 2009;41(5):1717-  
15 21 doi: 10.1016/j.transproceed.2009.03.058published Online First.  
16  
17  
18 228. Xiao L, Fu ZR, Ding GS, et al. Prediction of survival after liver transplantation for  
19 chronic severe hepatitis b based on preoperative prognostic scores: A single center's experience  
20 in China. *World J Surg* 2009;33(11):2420-26 doi: 10.1007/s00268-009-0183-3published Online  
21 First.  
22  
23  
24 229. Xiao M, Xu X, Zhu H, et al. Efficacy and safety of basiliximab in liver transplantation for  
25 patients with hepatitis B virus-related diseases: A single centre study. *Int J Clin Pract*  
26 2015;69(S183):35-42 doi: 10.1111/ijcp.12665published Online First.  
27  
28  
29  
30 230. Xie BX, Zhu YM, Chen C, et al. Outcome of TiNi stent treatments in symptomatic  
31 central airway stenoses caused by *Aspergillus fumigatus* infections after lung transplantation.  
32 *Transplant Proc* 2013;45(6):2366-70 doi: 10.1016/j.transproceed.2013.02.129published Online  
33 First.  
34  
35  
36 231. Xie HY, Wang WL, Yao MY, et al. Polymorphisms in Cytokine Genes and Their  
37 Association with Acute Rejection and Recurrence of Hepatitis B in Chinese Liver Transplant  
38 Recipients. *Arch Med Res* 2008;39(4):420-28 doi: 10.1016/j.arcmed.2008.01.003published  
39 Online First.  
40  
41  
42 232. Xie M, Rao W, Sun LY, et al. Tacrolimus-related seizure after pediatric liver  
43 transplantation - A single-center experience. *Pediatr Transplant* 2014;18(1):58-63 doi:  
44 10.1111/petr.12198published Online First.  
45  
46  
47 233. Xie M, Rao W, Yang T, et al. Occult hepatitis B virus infection predicts de novo hepatitis  
48 B infection in patients with alcoholic cirrhosis after liver transplantation. *Liver International*  
49 2015;35(3):897-904 doi: 10.1111/liv.12567published Online First.  
50  
51  
52  
53  
54  
55  
56  
57  
58  
59

- 1  
2  
3 234. Xie SB, Zhu JY, Ying Z, et al. Prevention and risk factors of the HBV recurrence after  
4 orthotopic liver transplantation: 160 cases follow-up study. *Transplantation* 2010;90(7):786-90  
5 doi: 10.1097/TP.0b013e3181f09c89published Online First.  
6  
7  
8 235. Xing T, Huang L, Yu Z, et al. Comparison of Steroid-Free Immunosuppression and  
9 Standard Immunosuppression for Liver Transplant Patients with Hepatocellular Carcinoma.  
10 *PLoS One* 2013;8(8) doi: 10.1371/journal.pone.0071251published Online First.  
11  
12  
13 236. Xing T, Qiu G, Zhong L, et al. Calcitriol reduces the occurrence of acute cellular  
14 rejection of liver transplants: A prospective controlled study. *Pharmazie* 2013;68(10):821-26 doi:  
15 10.1691/ph.2013.3561published Online First.  
16  
17  
18 237. Xing T, Zhong L, Chen D, et al. Experience of combined liver-kidney transplantation for  
19 acute-on-chronic liver failure patients with renal dysfunction. *Transplant Proc* 2013;45(6):2307-  
20 13 doi: 10.1016/j.transproceed.2013.02.127published Online First.  
21  
22  
23 238. Xing T, Zhong L, Qiu G, et al. Evolution of CD4+CD25hi T cell subsets in Aspergillus-  
24 infected liver transplantation recipients reduces the incidence of transplantation rejection via  
25 upregulating the production of anti-inflammatory cytokines. *Genetics and Molecular Research*  
26 2014;13(3):4932-39 doi: 10.4238/2014.July.4.7published Online First.  
27  
28  
29 239. Xu G, Li LL, Sun ZT, et al. Effects of dexmedetomidine on postoperative cognitive  
30 dysfunction and serum levels of  $\beta$ -amyloid and neuronal microtubule-associated protein in  
31 orthotopic liver transplantation patients. *Ann Transplant* 2016;21:508-15 doi:  
32 10.12659/AOT.899340published Online First.  
33  
34  
35 240. Xu H, Li W, Xu Z, et al. Evaluation of the right ventricular ejection fraction during  
36 classic orthotopic liver transplantation without venovenous bypass. *Clin Transplant*  
37 2012;26(5):E485-E91 doi: 10.1111/ctr.12010published Online First.  
38  
39  
40 241. Xu J, Shen ZY, Chen XG, et al. A randomized controlled trial of licartin for preventing  
41 hepatoma recurrence after liver transplantation. *Hepatology* 2007;45(2):269-76 doi:  
42 10.1002/hep.21465published Online First.  
43  
44  
45 242. Xu L, Li X, Xu M, et al. Perioperative use of ECMO during double lung transplantation.  
46 *ASAIO J* 2009;55(3):255-58 doi: 10.1097/MAT.0b013e3181a05795published Online First.  
47  
48  
49 243. Xu L, Xu MQ, Yan LN, et al. Causes of mortality after liver transplantation: A single  
50 center experience in mainland China. *Hepatogastroenterology* 2012;59(114):481-84 doi:  
51 10.5754/hge11419published Online First.  
52  
53  
54  
55  
56  
57  
58  
59  
60



- 1  
2  
3  
4  
5 244. Xu X, Guo HJ, Xie HY, et al. ZIP4, a novel determinant of tumor invasion in  
6 hepatocellular carcinoma, contributes to tumor recurrence after liver transplantation. *Int J Biol*  
7 *Sci* 2014;10(3):245-56 doi: 10.7150/ijbs.7401published Online First.  
8  
9  
10 245. Xu X, Ke QH, Shao ZX, et al. The value of serum  $\alpha$ -fetoprotein in predicting tumor  
11 recurrence after liver transplantation for hepatocellular carcinoma. *Dig Dis Sci* 2009;54(2):385-  
12 88 doi: 10.1007/s10620-008-0349-0published Online First.  
13  
14  
15 246. Xu X, Ling Q, Gao F, et al. Hepatoprotective effects of marine and kuhuang in liver  
16 transplant recipients. *Am J Chin Med* 2009;37(1):27-34 Online First.  
17  
18  
19 247. Xu X, Ling Q, Wu J, et al. A novel prognostic model based on serum levels of total  
20 bilirubin and creatinine early after liver transplantation. *Liver International* 2007;27(6):816-24  
21 doi: 10.1111/j.1478-3231.2007.01494.xpublished Online First.  
22  
23  
24 248. Xu X, Ling Q, Zhang M, et al. Outcome of patients with hepatorenal syndrome type 1  
25 after liver transplantation: Hangzhou experience. *Transplantation* 2009;87(10):1514-19 doi:  
26 10.1097/TP.0b013e3181a4430bpublished Online First.  
27  
28  
29 249. Xu X, Liu X, Ling Q, et al. Artificial Liver Support System Combined with Liver  
30 Transplantation in the Treatment of Patients with Acute-on-Chronic Liver Failure. *PLoS One*  
31 2013;8(3) doi: 10.1371/journal.pone.0058738published Online First.  
32  
33  
34 250. Xu X, Qu K, Wan Y, et al. Tumor existence and tumor size as prognostic factors in  
35 hepatitis B virus-related cirrhosis patients who underwent liver transplantation. *Transplant Proc*  
36 2014;46(5):1389-92 doi: 10.1016/j.transproceed.2014.01.011published Online First.  
37  
38  
39 251. Xu X, Tu Z, Wang B, et al. A novel model for evaluating the risk of hepatitis B  
40 recurrence after liver transplantation. *Liver International* 2011;31(10):1477-84 doi:  
41 10.1111/j.1478-3231.2011.02500.xpublished Online First.  
42  
43  
44 252. Xu ZD, Xu HT, Li WW, et al. Influence of preoperative diastolic dysfunction on  
45 hemodynamics and outcomes of patients undergoing orthotopic liver transplantation. *Int J Clin*  
46 *Exp Med* 2013;6(5):351-57 Online First.  
47  
48  
49 253. Xue F, Higgs BW, Huang J, et al. HERC5 is a prognostic biomarker for post-liver  
50 transplant recurrent human hepatocellular carcinoma. *J Transl Med* 2015;13(1) doi:  
51 10.1186/s12967-015-0743-2published Online First.  
52  
53  
54  
55  
56  
57  
58  
59  
60

- 1  
2  
3 254. Xue F, Zhang J, Han L, et al. Immune cell functional assay in monitoring of adult liver  
4 transplantation recipients with infection. *Transplantation* 2010;89(5):620-26 doi:  
5 10.1097/TP.0b013e3181c690fapublished Online First.  
6  
7  
8 255. Xue J, Wang L, Chen CM, et al. Acute kidney injury influences mortality in lung  
9 transplantation. *Ren Fail* 2014;36(4):541-45 doi: 10.3109/0886022X.2013.876350published  
10 Online First.  
11  
12  
13 256. Xue M, Lv C, Chen X, et al. Donor liver steatosis: A risk factor for early new-onset  
14 diabetes after liver transplantation. *Journal of Diabetes Investigation* 2017;8(2):181-87 doi:  
15 10.1111/jdi.12560published Online First.  
16  
17  
18 257. Yambe T, Meng X, Hou X, et al. Cardio-ankle vascular index (CAVI) for the monitoring  
19 of the atherosclerosis after heart transplantation. *Biomed Pharmacother* 2005;59(SUPPL.  
20 1):S177-S79 doi: 10.1016/S0753-3322(05)80028-9published Online First.  
21  
22  
23 258. Yan S, Tu Z, Lu W, et al. Clinical utility of an automated pupillometer for assessing and  
24 monitoring recipients of liver transplantation. *Liver Transpl* 2009;15(12):1718-27 doi:  
25 10.1002/lt.21924published Online First.  
26  
27  
28 259. Yang CH, He XS, Chen J, et al. Fungal infection in patients after liver transplantation in  
29 years 2003 to 2012. *Ann Transplant* 2012;17(4):59-63 doi: 10.12659/AOT.883695published  
30 Online First.  
31  
32  
33 260. Yang JW, Liao SS, Zhu LQ, et al. Population pharmacokinetic analysis of tacrolimus  
34 early after Chinese pediatric liver transplantation. *Int J Clin Pharmacol Ther* 2015;53(1):75-83  
35 doi: 10.5414/CP202189published Online First.  
36  
37  
38 261. Yang X, Lu Q, Tang T, et al. Prediction of the prognosis after liver transplantation in  
39 severe hepatitis B-induced liver failure and clinical decision for liver transplantation. *J Surg Res*  
40 2013;183(2):846-51 doi: 10.1016/j.jss.2013.01.034published Online First.  
41  
42  
43 262. Yang YJ, Chen DZ, Li LX, et al. Sirolimus-Based Immunosuppressive Therapy in Liver  
44 Transplant Recipient With Tacrolimus-Related Chronic Renal Insufficiency. *Transplant Proc*  
45 2008;40(5):1541-44 doi: 10.1016/j.transproceed.2008.01.081published Online First.  
46  
47  
48 263. Yang YL, Shi LJ, Lin MJ, et al. Clinical analysis and significance of cholangiography for  
49 biliary cast/stone after orthotopic liver transplantation. *Journal of Nanoscience and*  
50 *Nanotechnology* 2013;13(1):171-77 doi: 10.1166/jnn.2013.6790published Online First.  
51  
52  
53  
54  
55  
56  
57  
58  
59  
60

- 1  
2  
3 264. Yang Z, Zhou L, Wu LM, et al. Overexpression of long non-coding RNA HOTAIR  
4 predicts tumor recurrence in hepatocellular carcinoma patients following liver transplantation.  
5 Ann Surg Oncol 2011;18(5):1243-50 doi: 10.1245/s10434-011-1581-y published Online First.  
6  
7  
8 265. Yang Z, Zhou L, Wu LM, et al. Combination of polymorphisms within the HDAC1 and  
9 HDAC3 gene predict tumor recurrence in hepatocellular carcinoma patients that have undergone  
10 transplant therapy. Clin Chem Lab Med 2010;48(12):1785-91 doi:  
11 10.1515/CCLM.2010.353 published Online First.  
12  
13  
14  
15 266. Yao J, Feng XW, Yu XB, et al. Recipient IL-6-572c/G genotype is associated with  
16 reduced incidence of acute rejection following liver transplantation. J Int Med Res  
17 2013;41(2):356-64 doi: 10.1177/0300060513477264 published Online First.  
18  
19  
20 267. Yi H, An Y, Lv H, et al. The association of lipopolysaccharide and inflammatory factors  
21 with hepatopulmonary syndrome and their changes after orthotopic liver transplantation. J  
22 Thorac Dis 2014;6(10):1469-75 doi: 10.3978/j.issn.2072-1439.2014.10.05 published Online First.  
23  
24  
25 268. Yu S, He X, Yang L, et al. A retrospective study of conversion from tacrolimus-based to  
26 sirolimus-based immunosuppression in orthotopic liver transplant recipients. Exp Clin  
27 Transplant 2008;6(2):113-17 Online First.  
28  
29  
30  
31 269. Yu S, Wu L, Jin J, et al. Influence of CYP3A5 gene polymorphisms of donor rather than  
32 recipient to tacrolimus individual dose requirement in liver transplantation. Transplantation  
33 2006;81(1):46-51 doi: 10.1097/01.tp.0000188118.34633.bf published Online First.  
34  
35  
36 270. Yu X, Wei B, Dai Y, et al. Genetic polymorphism of Interferon Regulatory Factor 5  
37 (IRF5) correlates with allograft acute rejection of liver transplantation. PLoS One 2014;9(4) doi:  
38 10.1371/journal.pone.0094426 published Online First.  
39  
40  
41 271. Yu X, Xie H, Wei B, et al. Association of MDR1 gene SNPs and haplotypes with the  
42 tacrolimus dose requirements in Han Chinese liver transplant recipients. PLoS One 2011;6(11)  
43 doi: 10.1371/journal.pone.0025933 published Online First.  
44  
45  
46 272. Yuan D, Wei YG, Lin HM, et al. Risk factors of biliary complications following liver  
47 transplantation: Retrospective analysis of a single centre. Postgrad Med J 2009;85(1001):119-23  
48 doi: 10.1136/pgmj.2008.075176 published Online First.  
49  
50  
51 273. Zeng Z, Jiang Z, Wang CS, et al. Preoperative evaluation improves the outcome in heart  
52 transplant recipients with pulmonary hypertension-retrospective analysis of 106 cases.  
53  
54  
55  
56  
57  
58  
59

1  
2  
3 Transplant Proc 2010;42(9):3708-10 doi: 10.1016/j.transproceed.2010.08.067published Online  
4 First.  
5

6  
7 274. Zhai H, Liang P, Yu XL, et al. Microwave ablation in treating intrahepatic recurrence of  
8 hepatocellular carcinoma after liver transplantation: An analysis of 11 cases. Int J Hyperthermia  
9 2015;31(8):863-68 doi: 10.3109/02656736.2015.1091953published Online First.  
10

11  
12 275. Zhang A, Zhang M, Shen Y, et al. Hepatitis B virus reactivation is a risk factor for  
13 development of post-transplant lymphoproliferative disease after liver transplantation. Clin  
14 Transplant 2009;23(5):756-60 doi: 10.1111/j.1399-0012.2009.01049.xpublished Online First.  
15

16  
17 276. Zhang C, Rao J, Tu Z, et al. Surgical resection of resectable thoracic metastatic  
18 hepatocellular carcinoma after liver transplantation. J Thorac Cardiovasc Surg 2009;138(1):240-  
19 41 doi: 10.1016/j.jtcvs.2008.05.014published Online First.  
20

21  
22 277. Zhang D, Jiao Z, Han J, et al. Clinicopathological features of hepatitis B virus recurrence  
23 after liver transplantation: Eleven-year experience. Int J Clin Exp Pathol 2014;7(7):4057-66  
24 Online First.  
25

26  
27 278. Zhang F, Wu LM, Zhou L, et al. Predictive value of expression and promoter  
28 hypermethylation of XAF1 in hepatitis B virus-associated hepatocellular carcinoma treated with  
29 transplantation. Ann Surg Oncol 2008;15(12):3494-502 doi: 10.1245/s10434-008-0146-  
30 1published Online First.  
31

32  
33 279. Zhang FJ, Li CX, Liang Z, et al. Short- to mid-term evaluation of CT-guided 125I  
34 brachytherapy on intra-hepatic recurrent tumors and/or extra-hepatic metastases after liver  
35 transplantation for hepatocellular carcinoma. Cancer Biology and Therapy 2009;8(7):585-90  
36 Online First.  
37

38  
39 280. Zhang H, Chen L, Gu G, et al. Clinical observation and nursing care on the prevention of  
40 abdominal organ cluster transplantation rejection. J Clin Nurs 2013;22(11-12):1599-603 doi:  
41 10.1111/jocn.12079published Online First.  
42

43  
44 281. Zhang HM, Jiang WT, Pan C, et al. Milan criteria, University of California, San  
45 Francisco, criteria, and model for end-stage liver disease score as predictors of salvage liver  
46 transplantation. Transplant Proc 2015;47(2):438-44 doi:  
47 10.1016/j.transproceed.2014.10.046published Online First.  
48

- 1  
2  
3 282. Zhang HM, Li SP, Yu Y, et al. Bi-directional roles of IRF-1 on autophagy diminish its  
4 prognostic value as compared with Ki67 in liver transplantation for hepatocellular carcinoma.  
5 *Oncotarget* 2016;7(25):37979-92 doi: 10.18632/oncotarget.9365published Online First.  
6  
7  
8 283. Zhang LJ, Yang GF, Jiang B, et al. Cavernous transformation of portal vein: 16-Slice CT  
9 portography and correlation with surgical procedure of orthotopic liver transplantation. *Abdom*  
10 *Imaging* 2008;33(5):529-35 doi: 10.1007/s00261-007-9343-9published Online First.  
11  
12  
13 284. Zhang M, Yin F, Chen B, et al. Mortality risk after liver transplantation in hepatocellular  
14 carcinoma recipients: A nonlinear predictive model. *Surgery (United States)* 2012;151(6):889-97  
15 doi: 10.1016/j.surg.2011.12.034published Online First.  
16  
17  
18 285. Zhang M, Zhong X, Zhang W, et al. Human parvovirus B19 infection induced pure red  
19 cell aplasia in liver transplant recipients. *Int J Clin Pract* 2015;69(S183):29-34 doi:  
20 10.1111/ijcp.12664published Online First.  
21  
22  
23 286. Zhang ML, Xu J, Zhang W, et al. Microbial epidemiology and risk factors of infections  
24 in recipients after DCD liver transplantation. *Int J Clin Pract* 2016;70:17-21 doi:  
25 10.1111/ijcp.12812published Online First.  
26  
27  
28 287. Zhang P, Guo Z, Zhong K, et al. Evaluation of Immune Profiles and MicroRNA  
29 Expression Profiles in Peripheral Blood Mononuclear Cells of Long-Term Stable Liver  
30 Transplant Recipients and Recipients with Acute Rejection Episodes. *Transplant Proc*  
31 2015;47(10):2907-15 doi: 10.1016/j.transproceed.2015.10.048published Online First.  
32  
33  
34 288. Zhang Q, Chen H, Li Q, et al. Combination adjuvant chemotherapy with oxaliplatin, 5-  
35 fluorouracil and leucovorin after liver transplantation for hepatocellular carcinoma: A  
36 preliminary open-label study. *Invest New Drugs* 2011;29(6):1360-69 doi: 10.1007/s10637-011-  
37 9726-1published Online First.  
38  
39  
40 289. Zhang Q, Chen X, Zang Y, et al. The Survival Benefit of Liver Transplantation for  
41 Hepatocellular Carcinoma Patients with Hepatitis B Virus Infection and Cirrhosis. *PLoS One*  
42 2012;7(12) doi: 10.1371/journal.pone.0050919published Online First.  
43  
44  
45 290. Zhang Q, Shang L, Zang Y, et al.  $\alpha$ -Fetoprotein is a potential survival predictor in  
46 hepatocellular carcinoma patients with hepatitis B selected for liver transplantation. *Eur J*  
47 *Gastroenterol Hepatol* 2014;26(5):544-52 doi: 10.1097/MEG.000000000000029published  
48 Online First.  
49  
50  
51  
52  
53  
54  
55  
56  
57  
58  
59

- 1  
2  
3 291. Zhang W, Zhong H, Zhuang L, et al. Peripheral blood CD4+ cell ATP activity  
4 measurement to predict HCC recurrence post-DCD liver transplant. *Int J Clin Pract* 2016;70:11-  
5 16 doi: 10.1111/ijcp.12811published Online First.  
6  
7  
8 292. Zhang X, Fan J, Yang MF, et al. Monitoring of human cytomegalovirus infection in bone  
9 marrow and liver transplant recipients by antigenaemia assay and enzyme-linked immunosorbent  
10 assay. *J Int Med Res* 2009;37(1):31-36 Online First.  
11  
12  
13 293. Zhang X, Wang Z, Fan J, et al. Impact of interleukin-10 gene polymorphisms on  
14 tacrolimus dosing requirements in Chinese liver transplant patients during the early  
15 posttransplantation period. *Eur J Clin Pharmacol* 2011;67(8):803-13 doi: 10.1007/s00228-011-  
16 0993-8published Online First.  
17  
18  
19 294. Zhang X, Xu J, Fan J, et al. Influence of IL-18 and IL-10 Polymorphisms on Tacrolimus  
20 Elimination in Chinese Lung Transplant Patients. *Dis Markers* 2017;2017 doi:  
21 10.1155/2017/7834035published Online First.  
22  
23  
24 295. Zhang XD, Cheng Y, Poon CS, et al. Long-and short-range functional connectivity  
25 density alteration in non-alcoholic cirrhotic patients one month after liver transplantation: A  
26 resting-state fMRI study. *Brain Res* 2015;1620:177-87 doi:  
27 10.1016/j.brainres.2015.04.046published Online First.  
28  
29  
30 296. Zhang XF, Lv Y, Xue WJ, et al. Mycobacterium tuberculosis Infection in Solid Organ  
31 Transplant Recipients: Experience From a Single Center in China. *Transplant Proc*  
32 2008;40(5):1382-85 doi: 10.1016/j.transproceed.2008.01.075published Online First.  
33  
34  
35 297. Zhang XQ, Wang ZW, Fan JW, et al. The impact of sulfonyleureas on tacrolimus apparent  
36 clearance revealed by a population pharmacokinetics analysis in chinese adult liver-transplant  
37 patients. *Ther Drug Monit* 2012;34(2):126-33 doi: 10.1097/FTD.0b013e31824a67ebpublished  
38 Online First.  
39  
40  
41 298. Zhang Y, Wang YL, Liu YW, et al. Change of Peripheral Blood Mononuclear Cells IFN-  
42  $\gamma$ , IL-10, and TGF- $\beta$ 1 mRNA Expression Levels With Active Human Cytomegalovirus Infection  
43 in Orthotopic Liver Transplantation. *Transplant Proc* 2009;41(5):1767-69 doi:  
44 10.1016/j.transproceed.2009.03.064published Online First.  
45  
46  
47 299. Zhang Y, Yan L, Wen T, et al. Prophylaxis against hepatitis B virus recurrence after liver  
48 transplantation for hepatitis B virus-related end-stage liver diseases with severe hypersplenism  
49 and splenomegaly: Role of splenectomy. *J Surg Res* 2012;178(1):478-86 doi:  
50 10.1016/j.jss.2012.02.047published Online First.  
51  
52  
53  
54  
55  
56  
57  
58  
59  
60

- 1  
2  
3  
4  
5 300. Zhang YC, Qu EZ, Ren J, et al. New diagnosis and therapy model for ischemic-type  
6 biliary lesions following liver transplantation-a retrospective cohort study. PLoS One 2014;9(9)  
7 doi: 10.1371/journal.pone.0105795published Online First.  
8  
9  
10 301. Zheng RQ, Mao R, Ren J, et al. Contrast-enhanced ultrasound for the evaluation of  
11 hepatic artery stenosis after liver transplantation: Potential role in changing the clinical algorithm.  
12 Liver Transpl 2010;16(6):729-35 doi: 10.1002/lt.22054published Online First.  
13  
14  
15 302. Zheng S, Chen Y, Liang T, et al. Prevention of hepatitis B recurrence after liver  
16 transplantation using lamivudine or lamivudine combined with hepatitis B immunoglobulin  
17 prophylaxis. Liver Transpl 2006;12(2):253-58 doi: 10.1002/lt.20701published Online First.  
18  
19  
20 303. Zheng SS, Xu X, Wu J, et al. Liver transplantation for hepatocellular carcinoma:  
21 Hangzhou experiences. Transplantation 2008;85(12):1726-32 doi:  
22 10.1097/TP.0b013e31816b67e4published Online First.  
23  
24  
25 304. Zheng Z, Gao S, Yang Z, et al. Single nucleotide polymorphisms in the  
26 metastasis-associated in colon cancer-1 gene predict the recurrence of hepatocellular carcinoma  
27 after transplantation. Int J Med Sci 2014;11(2):142-50 doi: 10.7150/ijms.7142published Online  
28 First.  
29  
30  
31  
32 305. Zheng Z, Lin B, Zhang J, et al. Absolute lymphocyte count recovery at 1 month after  
33 transplantation predicts favorable outcomes of patients with hepatocellular carcinoma. Journal of  
34 Gastroenterology and Hepatology (Australia) 2015;30(4):706-11 doi:  
35 10.1111/jgh.12782published Online First.  
36  
37  
38 306. Zhenglu W, Hui L, Shuying Z, et al. A Clinical-Pathological Analysis of Drug-Induced  
39 Hepatic Injury After Liver Transplantation. Transplant Proc 2007;39(10):3287-91 doi:  
40 10.1016/j.transproceed.2007.08.096published Online First.  
41  
42  
43  
44 307. Zhong L, Men TY, Li H, et al. Multidrug-resistant gram-negative bacterial infections  
45 after liver transplantation - Spectrum and risk factors. J Infect 2012;64(3):299-310 doi:  
46 10.1016/j.jinf.2011.12.005published Online First.  
47  
48  
49 308. Zhongyang S, Yihe L, Lixin Y, et al. An experience from China of perioperative care in  
50 1510 liver transplant recipients. Int Anesthesiol Clin 2006;44(4):121-26 doi:  
51 10.1097/01.aia.0000210820.31029.92published Online First.  
52  
53  
54  
55  
56  
57  
58  
59  
60

- 1  
2  
3 309. Zhou B, Shan H, Zhu KS, et al. Chemoembolization with Lobaplatin Mixed with Iodized  
4 Oil for Unresectable Recurrent Hepatocellular Carcinoma after Orthotopic Liver Transplantation.  
5 *J Vasc Interv Radiol* 2010;21(3):333-38 doi: 10.1016/j.jvir.2009.11.006published Online First.  
6  
7  
8 310. Zhou J, Fan J, Wang JH, et al. Continuous transcatheter arterial thrombolysis for early  
9 hepatic artery thrombosis after liver transplantation. *Transplant Proc* 2005;37(10):4426-29 doi:  
10 10.1016/j.transproceed.2005.10.113published Online First.  
11  
12  
13 311. Zhou J, Huang H, Liu S, et al. Staphylococcus Aureus bacteremias following liver  
14 transplantation: A clinical analysis of 20 cases. *Ther Clin Risk Manag* 2015;11:933-37 doi:  
15 10.2147/TCRM.S84579published Online First.  
16  
17  
18 312. Zhou J, Ju W, Yuan X, et al. ABO-incompatible liver transplantation for severe hepatitis  
19 B patients. *Transpl Int* 2015;28(7):793-99 doi: 10.1111/tri.12531published Online First.  
20  
21  
22  
23 313. Zhou J, Wang Z, Qiu SJ, et al. Surgical treatment for early hepatocellular carcinoma:  
24 Comparison of resection and liver transplantation. *J Cancer Res Clin Oncol* 2010;136(9):1453-60  
25 doi: 10.1007/s00432-010-0802-2published Online First.  
26  
27  
28 314. Zhou J, Wang Z, Wu ZQ, et al. Sirolimus-Based Immunosuppression Therapy in Liver  
29 Transplantation for Patients With Hepatocellular Carcinoma Exceeding the Milan Criteria.  
30 *Transplant Proc* 2008;40(10):3548-53 doi: 10.1016/j.transproceed.2008.03.165published Online  
31 First.  
32  
33  
34 315. Zhou L, Fan J, Zheng SS, et al. Prevalence of Human Cytomegalovirus UL97 D605E  
35 Mutation in Transplant Recipients in China. *Transplant Proc* 2006;38(9):2926-28 doi:  
36 10.1016/j.transproceed.2006.08.161published Online First.  
37  
38  
39  
40 316. Zhou L, Wei B, Xing C, et al. Polymorphism in 3'-untranslated region of toll-like  
41 receptor 4 gene is associated with protection from hepatitis B virus recurrence after liver  
42 transplantation. *Transpl Infect Dis* 2011;13(3):250-58 doi: 10.1111/j.1399-  
43 3062.2010.00574.xpublished Online First.  
44  
45  
46  
47 317. Zhou L, Zhou W, Wu L, et al. The association of frequent allelic loss on 17p13.1 with  
48 early metastatic recurrence of hepatocellular carcinoma after liver transplantation. *J Surg Oncol*  
49 2010;102(7):802-08 doi: 10.1002/jso.21743published Online First.  
50  
51  
52 318. Zhou ZB, Shao XX, Yang XY, et al. Influence of Hydroxyethyl Starch on Renal Function  
53 after Orthotopic Liver Transplantation. *Transplant Proc* 2015;47(6):1616-19 doi:  
54 10.1016/j.transproceed.2015.04.095published Online First.  
55  
56  
57  
58  
59  
60



- 1  
2  
3  
4 319. Zhu L, Wang H, Rao W, et al. A limited sampling strategy for tacrolimus in liver  
5 transplant patients. *Int J Clin Pharmacol Ther* 2013;51(6):509-12 doi:  
6 10.5414/CP201876published Online First.  
7  
8  
9  
10 320. Zhu M, Li Y, Xia Q, et al. Strong impact of acute kidney injury on survival after liver  
11 transplantation. *Transplant Proc* 2010;42(9):3634-38 doi:  
12 10.1016/j.transproceed.2010.08.059published Online First.  
13  
14  
15 321. Zhu Q, Zhou L, Yang Z, et al. O-GlcNAcylation plays a role in tumor recurrence of  
16 hepatocellular carcinoma following liver transplantation. *Med Oncol* 2012;29(2):985-93 doi:  
17 10.1007/s12032-011-9912-1published Online First.  
18  
19  
20 322. Zhu X, Wu Y, Qiu Y, et al. Effects of  $\omega$ -3 fish oil lipid emulsion combined with  
21 parenteral nutrition on patients undergoing liver transplantation. *Journal of Parenteral and*  
22 *Enteral Nutrition* 2013;37(1):68-74 doi: 10.1177/0148607112440120published Online First.  
23  
24  
25 323. Zhu XD, Shen ZY, Chen XG, et al. Pathotyping and clinical manifestations of biliary cast  
26 syndrome in patients after an orthotopic liver transplant. *Exp Clin Transplant* 2013;11(2):142-49  
27 doi: 10.6002/ect.2012.0035published Online First.  
28  
29  
30  
31 324. Zhu XS, Gao YH, Wang SS, et al. Contrast-enhanced ultrasound diagnosis of splenic  
32 artery steal syndrome after orthotopic liver transplantation. *Liver Transpl* 2012;18(8):966-71 doi:  
33 10.1002/lt.23453published Online First.  
34  
35  
36 325. Zhu XS, Wang SS, Cheng Q, et al. Using ultrasonography to monitor liver blood flow for  
37 liver transplant from donors supported on extracorporeal membrane oxygenation. *Liver Transpl*  
38 2016;22(2):188-91 doi: 10.1002/lt.24318published Online First.  
39  
40  
41 326. Zhu ZJ, Shen ZY, Gao W, et al. Feasibility of using a liver infected with *Clonorchis*  
42 *sinensis* for liver transplantation: Fourteen cases. *Liver Transpl* 2010;16(12):1440-42 doi:  
43 10.1002/lt.22147published Online First.  
44  
45  
46  
47 327. Zicheng Y, Weixia Z, Hao C, et al. Limited sampling strategy for the estimation of  
48 mycophenolic acid area under the plasma concentration-time curve in adult patients undergoing  
49 liver transplant. *Ther Drug Monit* 2007;29(2):207-14 doi:  
50 10.1097/FTD.0b013e318040ce0bpublished Online First.  
51  
52  
53 328. Zou SJ, Chen D, Li YZ, et al. Monitoring Hepatocyte Dysfunction and Biliary  
54 Complication after Liver Transplantation Using Quantitative Hepatobiliary Scintigraphy.  
55  
56  
57  
58  
59

1  
2  
3  
4  
5  
6  
7  
8  
9  
10  
11  
12  
13  
14  
15  
16  
17  
18  
19  
20  
21  
22  
23  
24  
25  
26  
27  
28  
29  
30  
31  
32  
33  
34  
35  
36  
37  
38  
39  
40  
41  
42  
43  
44  
45  
46  
47  
48  
49  
50  
51  
52  
53  
54  
55  
56  
57  
58  
59  
60

Medicine (United States) 2015;94(45):e2009 doi: 10.1097/MD.0000000000002009published  
Online First.

329. Zou Y, Yang X, Jiang X, et al. High levels of soluble Major Histocompatibility Complex class I related chain A (MICA) are associated with biliary cast syndrome after liver transplantation. *Transpl Immunol* 2009;21(4):210-14 doi: 10.1016/j.trim.2009.06.003published Online First.

330. Cai X, Liu F, Zhu F, et al. Cholangiographic features and endoscopic treatment of biliary strictures. *Int J Clin Exp Med* 2015;8(2):2586-92 Online First.

331. Chen D, Liu S, Chen S, et al. Donor interleukin 6 gene polymorphisms predict the recurrence of hepatocellular carcinoma after liver transplantation. *Int J Clin Oncol* 2016;21(6):1111-19 Online First.

332. Chen H, Miao R, Fan J, et al. Decreased expression of miR-126 correlates with metastatic recurrence of hepatocellular carcinoma. *Clin Exp Metastasis* 2013;30(5):651-58 Online First.

333. Chen J, Wang Y, Shen Z, et al. Early diagnostic value of plasma PCT and BG assay for CRBSI after OLT. *Transplant Proc* 2011;43(5):1777-79 Online First.

334. Chen J, Zhong L. Clinical significance of serum hepcidin-25 levels in predicting invasive fungal disease in patients after transplantation. *Eur Rev Med Pharmacol Sci* 2013;17(13):1769-73 Online First.

335. Chen X, Meng X, Xu Y, et al. Cytokine and human leukocyte antigen (HLA) profile for graft-versus-host disease (GVHD) after organ transplantation. *Eur J Med Res* 2016;21(1):1-6 Online First.

336. Chen XY, Hou PF, Bi J, et al. Detection of human cytomegalovirus DNA in various blood components after liver transplantation. *Braz J Med Biol Res* 2014;47(4):340-44 Online First.

337. Cheng Y, Huang LX, Zhang L, et al. Longitudinal intrinsic brain activity changes in cirrhotic patients before and one month after liver transplantation. *Korean Journal of Radiology* 2017;18(2):370-77 Online First.

338. Chuan W, Li C, Wen TF, et al. Short-term and long-term outcomes of surgical treatment for HCC within milan criteria with cirrhotic portal hypertension. *Hepatogastroenterology* 2014;61(136):2185-90 Online First.

- 1  
2  
3  
4  
5 339. Dai X, Zhao HQ, Liu RH, et al. Percutaneous radiofrequency ablation guided by  
6 contrastenhanced ultrasound in treatment of metastatic hepatocellular carcinoma after liver  
7 transplantation. *Asian Pac J Cancer Prev* 2012;13(8):3709-12 Online First.  
8  
9  
10 340. Fan J, Zhang X, Chen XM, et al. Monitoring of human cytomegalovirus glycoprotein B  
11 genotypes using real-time quantitative PCR in immunocompromised Chinese patients. *J Virol*  
12 *Methods* 2009;160(1-2):74-77 Online First.  
13  
14  
15 341. Fan X, Chen Z, Nasralla D, et al. The organ preservation and enhancement of donation  
16 success ratio effect of extracorporeal membrane oxygenation in circulatory unstable brain death  
17 donor. *Clin Transplant* 2016;30(10):1306-13 Online First.  
18  
19  
20 342. Fang C, Yan S, Liu J, et al. Gastrointestinal perforation after liver transplantation.  
21 *Surgical Practice* 2016;20(1):8-12 Online First.  
22  
23  
24 343. Fu SJ, Ji F, Han M, et al. Prognostic value of combined preoperative fibrinogen and  
25 neutrophil-lymphocyte ratio in patients with hepatocellular carcinoma after liver transplantation.  
26 *Oncotarget* 2017;8(3):4301-12 Online First.  
27  
28  
29 344. Gao PJ, Gao J, Li Z, et al. Liver transplantation in adults with portal vein thrombosis:  
30 Data from the China Liver Transplant Registry. *Clinics and Research in Hepatology and*  
31 *Gastroenterology* 2016;40(3):327-32 Online First.  
32  
33  
34 345. Gao S, Yang Z, Zheng ZY, et al. Reduced expression of DACT2 promotes hepatocellular  
35 carcinoma progression: Involvement of methylation-mediated gene silencing. *World J Surg*  
36 *Oncol* 2013;11 (no pagination)(57) Online First.  
37  
38  
39 346. Guo QL, Duan BW, Lu SC, et al. Liver transplantation for hepatitis B-related acute-on-  
40 chronic liver failure patients. *Int J Clin Exp Med* 2017;10(2):2882-89 Online First.  
41  
42  
43 347. Han ZB, Chen HY, Fan JW, et al. Up-regulation of microRNA-155 promotes cancer cell  
44 invasion and predicts poor survival of hepatocellular carcinoma following liver transplantation. *J*  
45 *Cancer Res Clin Oncol* 2011:1-9 Online First.  
46  
47  
48 348. Huang J, Yan L, Wu H, et al. Is radiofrequency ablation applicable for recurrent  
49 hepatocellular carcinoma after liver transplantation? *J Surg Res* 2016;200(1):122-30 Online First.  
50  
51  
52  
53  
54  
55  
56  
57  
58  
59  
60

- 1  
2  
3 349. Huang Y, Yang X, Zhao F, et al. Overexpression of Dickkopf-1 predicts poor prognosis  
4 for patients with hepatocellular carcinoma after orthotopic liver transplantation by promoting  
5 cancer metastasis and recurrence. *Med Oncol* 2014;31 (7) (no pagination)(966) Online First.  
6  
7  
8 350. Huang ZY, Liang BY, Xiong M, et al. Severity of cirrhosis should determine the  
9 operative modality for patients with early hepatocellular carcinoma and compensated liver  
10 function. *Surgery (United States)* 2016;159(2):621-31 Online First.  
11  
12  
13 351. Lei JY, Yan LN, Wang WT, et al. Health-Related Quality of Life and Psychological  
14 Distress in Patients With Early-Stage Hepatocellular Carcinoma After Hepatic Resection or  
15 Transplantation. *Transplant Proc* 2016;48(6):2107-11 Online First.  
16  
17  
18 352. Li D, Lu T, Shen C, et al. Expression of fibroblast growth factor 21 in patients with  
19 biliary atresia. *Cytokine* 2016;83:13-18 Online First.  
20  
21  
22 353. Li H, Xie HY, Zhou L, et al. Lack of association of the polymorphism of the CCR5 gene  
23 in liver recipients with acute rejection from China. *Exp Clin Transplant* 2011;9(4):252-57 Online  
24 First.  
25  
26  
27 354. Li J, Bai Y, Wang L, et al. Regulatory Effect of FK506 on CD152 and PD-1 in the Liver  
28 Allorecipients. *Transplant Proc* 2008;40(5):1495-97 Online First.  
29  
30  
31 355. Li W, Yuan G, Liu H, et al. Comparison of HPLC-MS/MS and enzyme-multiplied  
32 immunoassay in tacrolimus determination and its application in therapeutic drug monitoring.  
33 *Latin American Journal of Pharmacy* 2015;34(8):1540-46 Online First.  
34  
35  
36 356. Li X, Chi X, Luo G, et al. Ulinastatin ameliorates acute kidney injury following liver  
37 transplantation in rats and humans. *Exp Ther Med* 2015;9(2):411-16 Online First.  
38  
39  
40 357. Lin B, Geng L, Zheng Z, et al. The predictive value of blood neutrophil-lymphocyte ratio  
41 in patients with end-stage liver cirrhosis following ABO-incompatible liver transplantation. *J Res*  
42 *Med Sci* 2016;21(5):20-25 Online First.  
43  
44  
45 358. Lin XH, Teng S, Wang L, et al. Fatigue and its associated factors in liver transplant  
46 recipients in Beijing: A cross-sectional study. *BMJ Open* 2017;7 (2) (no pagination)(A113)  
47 Online First.  
48  
49  
50 359. Lin YH, Cai ZS, Jiang Y, et al. Perioperative risk factors for pulmonary complications  
51 after liver transplantation. *J Int Med Res* 2010;38(5):1845-55 Online First.  
52  
53  
54  
55  
56  
57  
58  
59  
60

- 1  
2  
3 360. Ling L, He X, Zeng J, et al. In-hospital cerebrovascular complications following  
4 orthotopic liver transplantation: a retrospective study. *BMC Neurol* 2008;8:52 Online First.  
5  
6  
7 361. Ling Q, Xie H, Li J, et al. Donor Graft MicroRNAs: A Newly Identified Player in the  
8 Development of New-onset Diabetes After Liver Transplantation. *Am J Transplant*  
9 2017;17(1):255-64 Online First.  
10  
11  
12 362. Liu C, Tsai HL, Chin T, et al. Experience of surgical treatment for hepatoblastoma.  
13 *Formosan Journal of Surgery* 2016;49(2):56-62 Online First.  
14  
15  
16 363. Liu S, Bai Y, Huang J, et al. Do mitochondria contribute to left ventricular non-  
17 compaction cardiomyopathy? New findings from myocardium of patients with left ventricular  
18 non-compaction cardiomyopathy. *Mol Genet Metab* 2013;109(1):100-06 Online First.  
19  
20  
21  
22  
23 364. Liu X, Wang B, Zhang X, et al. Liver Transplantation Using Donation After Brain and  
24 Cardiac Death: A Single-Center Experience in China. *Transplant Proc* 2016;48(6):1879-86  
25 Online First.  
26  
27  
28 365. Liu Y, Liu YY, Li CP, et al. Comprehensive comparison of three different  
29 immunosuppressive regimens for liver transplant patients with hepatocellular carcinoma:  
30 Steroid-free immunosuppression, induction immunosuppression and standard  
31 immunosuppression. *PLoS One* 2015;10 (3) (no pagination)(e0120939) Online First.  
32  
33  
34  
35 366. Lu HW, Dong JH, Li CH, et al. The defects of cholangiocyte primary cilia in patients  
36 with graft cholangiopathies. *Clin Transplant* 2014;28(10):1202-08 Online First.  
37  
38  
39 367. Lu SC, Jiang T, Lai W, et al. Reestablishment of active immunity against HBV graft  
40 reinfection after liver transplantation for HBV-related end stage liver disease. *Journal of*  
41 *immunology research* 2014;2014:764234 Online First.  
42  
43  
44 368. Luo XJ, Wang W, Hu SS, et al. Extracorporeal membrane oxygenation for treatment of  
45 cardiac failure in adult patients. *Interact Cardiovasc Thorac Surg* 2009;9(2):296-300 Online First.  
46  
47  
48 369. Meng X, Chen X, Wu L, et al. The Hyperlipidemia Caused by Overuse of Glucocorticoid  
49 after Liver Transplantation and the Immune Adjustment Strategy. *Journal of Immunology*  
50 *Research* 2017;2017 (no pagination)(3149426) Online First.  
51  
52  
53  
54  
55  
56  
57  
58  
59

- 1  
2  
3 370. Niu Y, Chen X, Feng L, et al. Anti-HBc-positive/HBsAg-negative liver donors pose a  
4 higher risk of occult HBV infection but do not cause severe histological damage in liver grafts.  
5 Clinics and Research in Hepatology and Gastroenterology 2014;38(4):475-80 Online First.  
6  
7  
8 371. Peng C, Zhang Z, Wu J, et al. A critical role for ZDHHC2 in metastasis and recurrence in  
9 human hepatocellular carcinoma. BioMed Research International 2014;2014 (no  
10 pagination)(832712) Online First.  
11  
12  
13 372. Qiao B, Wu J, Wan Q, et al. Factors influencing mortality in abdominal solid organ  
14 transplant recipients with multidrug-resistant gram-negative bacteremia. BMC Infect Dis  
15 2017;17 (1) (no pagination)(171) Online First.  
16  
17  
18 373. Qu W, Zhu ZJ, Sun LY, et al. Correlation Between Immunosuppressive Therapy and  
19 CD4<sup>+</sup> T-Cell Intracellular Adenosine Triphosphate Levels in Liver Transplant  
20 Recipients. Transplant Proc 2016;48(6):2094-97 Online First.  
21  
22  
23 374. Qu W, Zhu ZJ, Sun LY, et al. Correlation Between Survival Interval and  
24 CD4<sup>+</sup> T-Cell Intracellular ATP Levels in Liver Transplant Recipients. Transplant  
25 Proc 2017;49(2):316-21 Online First.  
26  
27  
28 375. Ren L, Teng M, Zhang T, et al. Donors FMO3 polymorphisms affect tacrolimus  
29 elimination in Chinese liver transplant patients. Pharmacogenomics 2017;18(3):265-75 Online  
30 First.  
31  
32  
33 376. Ren QQ, Fu SJ, Zhao Q, et al. Prognostic value of preoperative peripheral monocyte  
34 count in patients with hepatocellular carcinoma after liver transplantation. Tumor Biology  
35 2016;37(7):8973-78 Online First.  
36  
37  
38 377. Ren X, Guan J, Gao N, et al. Evaluation of pediatric liver transplantation-related artery  
39 complications using intra-operative multi-parameter ultrasonography. Med Sci Monit  
40 2016;22:4495-502 Online First.  
41  
42  
43 378. Ren X, Luo Y, Gao N, et al. Common ultrasound and contrast-enhanced ultrasonography  
44 in the diagnosis of hepatic artery pseudoaneurysm after liver transplantation. Exp Ther Med  
45 2016;12(2):1029-33 Online First.  
46  
47  
48 379. Shan Y, Shen N, Han L, et al. MicroRNA-499 Rs3746444 polymorphism and biliary  
49 atresia. Dig Liver Dis 2016;48(4):423-28 Online First.  
50  
51  
52  
53  
54  
55  
56  
57  
58  
59  
60

- 1  
2  
3 380. Shen C, Peng C, Shen B, et al. Sirolimus and metformin synergistically inhibit  
4 hepatocellular carcinoma cell proliferation and improve long-term survival in patients with HCC  
5 related to hepatitis B virus induced cirrhosis after liver transplantation. *Oncotarget*  
6 2016;7(38):62647-56 Online First.  
7  
8  
9  
10 381. Shen Z, Zhu Z, Zhang Y, et al. Liver transplantation at Tianjin First Central Hospital.  
11 *Clin Transpl* 2005:221-23 Online First.  
12  
13  
14 382. Shen ZY, Zheng WP, Deng YL, et al. Variations in the S and P regions of the hepatitis B  
15 virus genome under immunosuppression in vitro and in vivo. *Viral Immunol* 2012;25(5):368-78  
16 Online First.  
17  
18  
19 383. Shi F, Zhang JY, Zeng Z, et al. Skewed ratios between CD3<sup>+</sup> T cells and  
20 monocytes are associated with poor prognosis in patients with HBV-related acute-on-chronic  
21 liver failure. *Biochem Biophys Res Commun* 2010;402(1):30-36 Online First.  
22  
23  
24 384. Shi SH, Kong HS, Jia CK, et al. Risk factors for pneumonia caused by multidrug-  
25 resistant Gram-negative bacilli among liver recipients. *Clin Transplant* 2010;24(6):758-65  
26 Online First.  
27  
28  
29 385. Su H, Ye Q, Wan Q, et al. Predictors of mortality in abdominal organ transplant  
30 recipients with pseudomonas aeruginosa infections. *Ann Transplant* 2016;21(no pagination)  
31 Online First.  
32  
33  
34 386. Wang L, Zang Y, Lu S, et al. Efficacy of sirolimus on ischemic-type biliary lesions after  
35 liver transplantation. *Int J Clin Exp Med* 2017;10(1):1151-55 Online First.  
36  
37  
38 387. Wang LJ, Liu ZR, Zhang YM, et al. Clinical analysis of liver transplantation for benign  
39 liver tumor. *Int J Clin Exp Med* 2016;9(11):22691-95 Online First.  
40  
41  
42 388. Wang P, Li H, Shi B, et al. Prognostic factors in patients with recurrent hepatocellular  
43 carcinoma treated with salvage liver transplantation: A singlecenter study. *Oncotarget*  
44 2016;7(23):35071-83 Online First.  
45  
46  
47 389. Wang PL, Wang J, Zhou Y, et al. Expression of programmed death-1 and its ligands in  
48 the liver of biliary atresia. *World J Pediatr* 2017:1-7 Online First.  
49  
50  
51 390. Wang Y, Shen Z, Zhu Z, et al. Clinical values of AFP, GPC3 mRNA in peripheral blood  
52 for prediction of hepatocellular carcinoma recurrence following OLT. *Hepatitis Monthly*  
53 2011;11(3):195-99 Online First.  
54  
55  
56  
57  
58  
59

- 1  
2  
3  
4  
5 391. Wang Z, Gong W, Shou D, et al. Clonal origin of hepatocellular carcinoma and  
6 recurrence after liver transplantation. *Ann Transplant* 2016;21:484-90 Online First.  
7
- 8  
9 392. Wei YJ, Huang YX, Zhang XL, et al. Apolipoprotein D as a novel marker in human end-  
10 stage heart failure: A preliminary study. *Biomarkers* 2008;13(5):535-48 Online First.  
11
- 12  
13 393. Wu D, Shen ZY, Zhang YM, et al. Effect of liver transplantation in combined  
14 hepatocellular and cholangiocellular carcinoma: A case series. *BMC Cancer* 2015;15 (1) (no  
15 pagination)(232) Online First.  
16
- 17  
18 394. Xia W, Ke Q, Guo H, et al. Expansion of the Milan criteria without any sacrifice:  
19 Combination of the Hangzhou criteria with the pre-transplant platelet-to-lymphocyte ratio. *BMC*  
20 *Cancer* 2017;17 (1) (no pagination)(14) Online First.  
21
- 22  
23 395. Xiao H, Tong R, Cheng S, et al. BAG3 and HIF-1 alpha coexpression detected by  
24 immunohistochemistry correlated with prognosis in hepatocellular carcinoma after liver  
25 transplantation. *BioMed Research International* 2014;2014 (no pagination)(516518) Online First.  
26
- 27  
28 396. Xing T, Zhong L, Qiu G, et al. Evolution of CD4<sup>+</sup>CD25<sup>hi</sup> T  
29 cell subsets in Aspergillus-infected liver transplantation recipients reduces the incidence of  
30 transplantation rejection via upregulating the production of anti-inflammatory cytokines.  
31 *Genetics and Molecular Research* 2014;13(3):4932-39 Online First.  
32
- 33  
34  
35 397. Xu SL, Zhang YC, Wang GY, et al. Survival analysis of sirolimus-based  
36 immunosuppression in liver transplantation in patients with hepatocellular carcinoma. *Clinics*  
37 *and Research in Hepatology and Gastroenterology* 2016;40(6):674-81 Online First.  
38
- 39  
40 398. Xu X, Ling Q, Wang J, et al. Donor miR-196a-2 polymorphism is associated with  
41 hepatocellular carcinoma recurrence after liver transplantation in a Han Chinese population. *Int J*  
42 *Cancer* 2016;138(3):620-29 Online First.  
43
- 44  
45 399. Xue M, Lv C, Chen X, et al. Effect of interleukin-2 receptor antagonists on new-onset  
46 diabetes after liver transplantation: A retrospective cohort study. *Journal of Diabetes* 2015  
47 Online First.  
48
- 49  
50  
51 400. Yan L, Li B, Wen T, et al. Prophylaxis Against hepatitis B recurrence posttransplantation  
52 using lamivudine and individualized low-dose hepatitis B immunoglobulin. *Am J Transplant*  
53 *2010;10(8):1861-69* Online First.  
54  
55  
56  
57  
58  
59  
60



- 1  
2  
3 401. Yang J, Zhu L, Zhang Y, et al. PPK analysis of tacrolimus early after Chinese pediatric  
4 and adult liver transplantation with different CYP3A5 genotypes. *Latin American Journal of*  
5 *Pharmacy* 2017;36(2):238-46 Online First.  
6  
7  
8 402. Yu D, Liu J, Chen J, et al. GGPPS1 predicts the biological character of hepatocellular  
9 carcinoma in patients with cirrhosis. *BMC Cancer* 2014;14 (1) (no pagination)(248) Online First.  
10  
11  
12 403. Yu S, Gao F, Yu J, et al. De novo cancers following liver transplantation: A single center  
13 experience in China. *PLoS One* 2014;9 (1) (no pagination)(e85651) Online First.  
14  
15  
16 404. Yu X, Liu Z, Wang Y, et al. Characteristics of Vdelta1<sup>+</sup> and  
17 Vdelta2<sup>+</sup> gammadelta T cell subsets in acute liver allograft rejection. *Transpl*  
18 *Immunol* 2013;29(1-4):118-22 Online First.  
19  
20  
21 405. Yu Z, Sun Z, Yu S, et al. Safety limitations of fatty liver transplantation can be extended  
22 to 40%: Experience of a single centre in China. *Liver International* 2016 Online First.  
23  
24  
25 406. Yuan X, Chen C, Zhou J, et al. Organ Donation and Transplantation From Donors With  
26 Systemic Infection: A Single-Center Experience. *Transplant Proc* 2016;48(7):2454-57 Online  
27 First.  
28  
29  
30  
31 407. Zhang G, Cheng Y, Shen W, et al. The short-term effect of liver transplantation on the  
32 low-frequency fluctuation of brain activity in cirrhotic patients with and without overt hepatic  
33 encephalopathy. *Brain Imaging and Behavior* 2016:1-13 Online First.  
34  
35  
36 408. Zhang H, Shi Y, Wu H, et al. Change of hepatic arterial systolic/diastolic ratio predicts  
37 ischemic type biliary lesion after orthotopic liver transplantation. *Clin Imaging* 2016;40(3):419-  
38 24 Online First.  
39  
40  
41 409. Zhang M, Yin F, Chen B, et al. Pretransplant prediction of posttransplant survival for  
42 liver recipients with benign end-stage liver diseases: A nonlinear model. *PLoS One* 2012;7 (3)  
43 (no pagination)(e31256) Online First.  
44  
45  
46 410. Zhang XX, Bian RJ, Wang J, et al. Relationship between cytokine gene polymorphisms  
47 and acute rejection following liver transplantation. *Genetics and Molecular Research* 2016;15 (2)  
48 (no pagination)(15027599) Online First.  
49  
50  
51 411. Zhang YC, Liu W, Fu BS, et al. Therapeutic potentials of umbilical cord-derived  
52 mesenchymal stromal cells for ischemic-type biliary lesions following liver transplantation.  
53 *Cytotherapy* 2017;19(2):194-99 Online First.  
54  
55  
56  
57  
58  
59

- 1  
2  
3  
4  
5 412. Zhong L, Li H, Li Z, et al. C7 genotype of the donor may predict early bacterial infection  
6 after liver transplantation. *Sci Rep* 2016;6:24121 Online First.  
7
- 8  
9 413. Zhong X, Zhang W, Xu J, et al. Human parvovirus B19 infection induced pure red cell  
10 aplasia in liver transplant recipients. *Int J Clin Pract* 2015;69(S183):29-34 Online First.  
11
- 12  
13 414. Zhong ZQ, Luo AJ, Wan QQ, et al. Pseudomonas Aeruginosa Infection Among Liver  
14 Transplant Recipients: A Clinical Analysis of 15 Cases. *Transplant Proc* 2016;48(6):2130-34  
15 Online First.  
16
- 17  
18 415. Zhou Q, Wang Y, Zhou X, et al. Prognostic analysis for treatment modalities in  
19 hepatocellular carcinomas with portal vein tumor thrombi. *Asian Pac J Cancer Prev*  
20 2011;12(11):2847-50 Online First.  
21
- 22  
23 416. Zhu B, Chen Y, Xie Y, et al. Kaposi's sarcoma-associated herpesvirus (KSHV) infection:  
24 Endemic strains and cladograms from immunodeficient patients in China. *J Clin Virol*  
25 2008;42(1):7-12 Online First.  
26
- 27  
28 417. Zhu L, Yang J, Jing Y, et al. Effects of CYP3A5 genotypes, ABCB1 C3435T and  
29 G2677T/A polymorphism on pharmacokinetics of Tacrolimus in Chinese adult liver transplant  
30 patients. *Xenobiotica* 2015;45(9):840-46 Online First.  
31
- 32  
33 418. Aidong W, Zhenjie C, Tong L, et al. Therapeutic drug monitoring of tacrolimus in early  
34 stage after heart transplantation. *Transplant Proc* 2004;36(8):2388-9 Online First.  
35
- 36  
37 419. Chen Z, Gong R, Luo Y, et al. Surgical procedures for hepatolithiasis.  
38 *Hepatogastroenterology* 2010;57(97):134-7 Online First.  
39
- 40  
41 420. Chen ZS, Zeng FJ, Ming CS, et al. The survival and value of liver transplantation for  
42 liver carcinoma: a single-center experience. *Transplant Proc* 2004;36(8):2284-6 Online First.  
43
- 44  
45 421. Cheng J, Xie HY, Xu X, et al. NDRG1 as a biomarker for metastasis, recurrence and of  
46 poor prognosis in hepatocellular carcinoma. *Cancer Lett* 2011;310(1):35-45 Online First.  
47
- 48  
49 422. Gurbanov E, Meng X, Cui Y, et al. Evaluation ECMO in adult cardiac transplantation:  
50 can outcomes of marginal donor hearts be improved? *J Cardiovasc Surg (Torino)*  
51 2011;52(3):419-27 Online First.  
52  
53  
54  
55  
56  
57  
58  
59  
60

- 1  
2  
3 423. Hao C, Anwei M, Bing C, et al. Monitoring mycophenolic acid pharmacokinetic  
4 parameters in liver transplant recipients: prediction of occurrence of leukopenia. *Liver Transpl*  
5 2008;14(8):1165-73 Online First.  
6  
7  
8 424. Hao C, Erzhen C, Anwei M, et al. Validation of limited sampling strategy for the  
9 estimation of mycophenolic acid exposure in Chinese adult liver transplant recipients. *Liver*  
10 *Transpl* 2007;13(12):1684-93 Online First.  
11  
12  
13 425. Jiang L, Lei JY, Wang WT, et al. Immediate radical therapy or conservative treatments  
14 when meeting the Milan criteria for advanced HCC patients after successful TACE. *J*  
15 *Gastrointest Surg* 2014;18(6):1125-30 Online First.  
16  
17  
18 426. Lei J, Wang W, Yan L. Downstaging advanced hepatocellular carcinoma to the Milan  
19 criteria may provide a comparable outcome to conventional Milan criteria. *J Gastrointest Surg*  
20 2013;17(8):1440-6 Online First.  
21  
22  
23 427. Li H, Yang S, Chen H, et al. Survival after heart transplantation for non-metastatic  
24 primary cardiac sarcoma. *J Cardiothorac Surg* 2016;11(1):145 Online First.  
25  
26  
27 428. Li N, Zhou J, Weng D, et al. Adjuvant adenovirus-mediated delivery of herpes simplex  
28 virus thymidine kinase administration improves outcome of liver transplantation in patients with  
29 advanced hepatocellular carcinoma. *Clin Cancer Res* 2007;13(19):5847-54 Online First.  
30  
31  
32 429. Liu Y, Sun LY, Zhu ZJ, et al. Measles Virus Infection in Pediatric Liver Transplantation  
33 Recipients. *Transplant Proc* 2015;47(9):2715-8 Online First.  
34  
35  
36 430. Liu Z, Yu X, Ren W, et al. CD152 and PD-1 down-regulation on CD8 T cells is  
37 associated with human acute liver allograft rejection. *Transplant Proc* 2014;46(10):3511-4  
38 Online First.  
39  
40  
41 431. Shi R, Shen ZY, Teng da H, et al. Gallstones in liver transplant recipients: A single-  
42 center study in China. *Turkish Journal of Gastroenterology* 2015;26(5):429-34 Online First.  
43  
44  
45 432. Teng da H, Zhu ZJ, Zheng H, et al. Effect of steatosis donor liver transplantation on  
46 hepatocellular carcinoma recurrence: experience at a single institution. *Hepatogastroenterology*  
47 2012;59(115):858-62 Online First.  
48  
49  
50 433. Teng F, Han QC, Ding GS, et al. Validation of a criteria-specific long-term survival  
51 prediction model for hepatocellular carcinoma patients after liver transplantation. *Sci Rep*  
52 2015;5:11733 Online First.  
53  
54  
55  
56  
57  
58  
59  
60

- 1  
2  
3  
4  
5 434. Wang C, Wang G, Yi H, et al. Symptom experienced three years after liver  
6 transplantation under immunosuppression in adults.[Erratum appears in PLoS One. 2013;8(12).  
7 doi:10.1371/annotation/161a6145-d670-408a-a9fc-a1107b57724a]. PLoS ONE [Electronic  
8 Resource] 2013;8(11):e80584 Online First.  
9
- 10  
11 435. Wang GY, Li H, Liu W, et al. Elevated blood eosinophil count is a valuable biomarker  
12 for predicting late acute cellular rejection after liver transplantation. *Transplant Proc*  
13 2013;45(3):1198-200 Online First.  
14  
15
- 16 436. Wang ZX, Fu ZR, Ding GS, et al. Prevention of hepatitis B virus reinfection after  
17 orthotopic liver transplantation. *Transplant Proc* 2004;36(8):2315-7 Online First.  
18  
19
- 20 437. Wei-lin W, Jing J, Shu-sen Z, et al. Tacrolimus dose requirement in relation to donor and  
21 recipient ABCB1 and CYP3A5 gene polymorphisms in Chinese liver transplant patients. *Liver*  
22 *Transpl* 2006;12(5):775-80 Online First.  
23  
24
- 25 438. Xing T, Zhong L, Chen D, et al. Experience of combined liver-kidney transplantation for  
26 acute-on-chronic liver failure patients with renal dysfunction.[Erratum appears in *Transplant*  
27 *Proc.* 2013 Sep;45(7):2859]. *Transplant Proc* 2013;45(6):2307-13 Online First.  
28  
29
- 30 439. Xing T, Zhong L, Lin L, et al. Immunity of fungal infections alleviated graft reject in  
31 liver transplantation compared with non-fungus recipients. *Int J Clin Exp Pathol* 2015;8(3):2603-  
32 14 Online First.  
33  
34
- 35 440. Ye D, Li H, Wang Y, et al. Circulating Fibroblast Growth Factor 21 Is A Sensitive  
36 Biomarker for Severe Ischemia/reperfusion Injury in Patients with Liver Transplantation. *Sci*  
37 *Rep* 2016;6:19776 Online First.  
38  
39
- 40 441. Yu S, Yu J, Zhang W, et al. Safe use of liver grafts from hepatitis B surface antigen  
41 positive donors in liver transplantation. *J Hepatol* 2014;61(4):809-15 Online First.  
42  
43
- 44 442. Yuefeng M, Weili F, Wenxiang T, et al. Long-term outcome of patients with lamivudine  
45 after early cessation of hepatitis B immunoglobulin for prevention of recurrent hepatitis B  
46 following liver transplantation. *Clin Transplant* 2011;25(4):517-22 Online First.  
47  
48
- 49 443. Zhang Q, Chen X, Zhou J, et al. CD147, MMP-2, MMP-9 and MVD-CD34 are  
50 significant predictors of recurrence after liver transplantation in hepatocellular carcinoma  
51 patients. *Cancer Biol Ther* 2006;5(7):808-14 Online First.  
52  
53  
54  
55  
56  
57  
58  
59  
60

1  
2  
3 444. Gu Z, Chen B, Song Y, et al. Pharmacokinetics of free mycophenolic acid and limited  
4 sampling strategy for the estimation of area under the curve in liver transplant patients. Eur J  
5 Pharm Sci 2012;47(4):636-41 doi: 10.1016/j.ejps.2012.08.001published Online First.  
6  
7

8 445. Guo CB, Li YC, Zhang MM, et al. Early Postoperative Care of Liver Transplantation for  
9 Infants With Biliary Atresia During Pediatric Intensive Care Unit Stay. Transplant Proc  
10 2010;42(5):1750-54 doi: 10.1016/j.transproceed.2010.02.086published Online First.  
11  
12  
13  
14  
15  
16  
17  
18  
19  
20  
21  
22  
23  
24  
25  
26  
27  
28  
29  
30  
31  
32  
33  
34  
35  
36  
37  
38  
39  
40  
41  
42  
43  
44  
45  
46  
47  
48  
49  
50  
51  
52  
53  
54  
55  
56  
57  
58  
59  
60

|    | B                                                        | C         | D          | E           | F             | G             | H            | I             | J              | K             | L              | M            |
|----|----------------------------------------------------------|-----------|------------|-------------|---------------|---------------|--------------|---------------|----------------|---------------|----------------|--------------|
| 1  | Reference                                                | Publicati | Organ type | Organs from | No of Tx from | Year of first | Year of last | Ethics approv | Ethics text    | Donor identit | Donor identit  | Type of dona |
| 2  | Awang DVC, Kong L, Jiang W. Schisandra extract ef        | 2010      | Livers     | DD          | 32            | 2004          | 2008         | Yes           | This study wa  | No            |                | OT           |
| 3  | Bai DS, Dai Z, Zhou J, et al. Capn4 overexpression u     | 2009      | Livers     |             | 252           | 2001          | 2005         | Yes           | Ethical appro  | No            |                | 0            |
| 4  | Bu X, Zheng Z, Yu Y, et al. Significance of C4d Depo     | 2006      | Livers     | DD          | 20            | 2001          | 2004         | No            |                | No            |                | 0            |
| 5  | Cai CJ, Lu MQ, Chen YH, et al. Clinical study on prev    | 2012      | Livers     |             | 252           | 2005          | 2007         | No            |                | No            |                | 0            |
| 6  | Cai Q, Li S, Jiang Y, et al. Alleviating graft injury du | 2016      | Livers     | DD          | 42            | 2013          | 2014         | Yes           | This study wa  | No            |                | 0            |
| 7  | Chen B, Gu Z, Chen H, et al. Establishment of high-      | 2010      | Livers     |             | 51            | 0             | 0            | Yes           | The study pro  | No            |                | 0            |
| 8  | Chen D, Fan J, Guo F, et al. Novel Single Nucleotid      | 2013      | Livers     |             | 96            | 2007          | 2011         | Yes           | This research  | No            |                | 0            |
| 9  | Chen D, Guo F, Shi J, et al. Association of hemoglo      | 2014      | Livers     |             | 96            | 2007          | 2012         | Yes           | This study wa  | No            |                | 0            |
| 10 | Chen G, Liu H, Hu ZQ, et al. A new scheme with inf       | 2015      | Livers     |             | 102           | 2006          | 2010         | Yes           | This study wa  | No            |                | 0            |
| 11 | Chen GH, Fu BS, Cai CJ, et al. A Single-Center Expe      | 2008      | Livers     |             | 31            | 2004          | 2007         | No            |                | No            |                | 0            |
| 12 | Chen GH, Wang GY, Yang Y, et al. Single-center ex        | 2009      | Livers     |             | 20            | 2003          | 2007         | No            |                | No            |                | 0            |
| 13 | Chen GH, Yang Y, Lu MQ, et al. Liver transplantati       | 2010      | Livers     |             | 268           | 2003          | 2007         | No            |                | No            |                | 0            |
| 14 | Chen H, Chen E, Mao A, et al. Validation of limited      | 2007      | Livers     |             | 30            | 0             | 0            | Yes           | The study wa   | No            |                | 0            |
| 15 | Chen H, Gu Z, Chen B, et al. Models for the predict      | 2008      | Livers     |             | 60            | 0             | 0            | Yes           | The study pro  | No            |                | 0            |
| 16 | Chen H, Peng C, Yu Z, et al. Pharmacokinetics of m       | 2007      | Livers     |             | 40            | 0             | 0            | Yes           | The study de   | No            |                | 0            |
| 17 | Chen HY, Han ZB, Fan JW, et al. MiR-203 expressio        | 2012      | Livers     | DD          | 66            | 2002          | 2007         | Yes           | Use of forma   | No            |                | 0            |
| 18 | Chen J, Li Y, Wang L, et al. Association of three SN     | 2012      | Livers     |             | 178           | 2003          | 2010         | Yes           | This study wa  | No            |                | 0            |
| 19 | Chen P, Wang W, Yan L, et al. Risk factors for first     | 2015      | Livers     | DD          | 791           | 1999          | 2013         | Yes           | This study wa  | No            |                | OT           |
| 20 | Chen Y, Zhang H, Xiao X, et al. Peripheral blood tra     | 2013      | Hearts     | DD          | 12            | 2006          | 2010         | Yes           | After approv   | Yes           | All the donor  | 0            |
| 21 | Chen YB, Li SD, Ju BL, et al. Suitable calcineurin inf   | 2011      | Livers     |             | 97            | 2006          | 2008         | Yes           | All grafts we  | Yes           | Nothing in pa  | 0            |
| 22 | Chen ZY, Yan LN, Zeng Y, et al. Preliminary Experie      | 2008      | Livers     | DD          | 14            | 2000          | 2006         | Yes           | The ethical a  | Yes           | All donors in  | 0            |
| 23 | Cheng JW, Shi YH, Fan J, et al. An immune functio        | 2011      | Livers     |             | 197           | 2002          | 2010         | Yes           | All blood san  | No            |                | 0            |
| 24 | Cheng L, Tian F, Tang L, et al. Local distribution an    | 2012      | Livers     |             | 73            | 2000          | 2006         | Yes           | Written infor  | No            |                | 0            |
| 25 | Cheng Y, Huang L, Zhang X, et al. Liver transplanta      | 2015      | Livers     |             | 12            | 2013          | 2014         | Yes           | This study wa  | No            |                | 0            |
| 26 | Chu Z, Zhang J, Zhao Y, et al. Influence of immunos      | 2010      | Livers     |             | 47            | 0             | 0            | No            |                | Yes           | No prisoners   | 0            |
| 27 | Dai Y, Li C, Wen TF, et al. Comparison of liver rese     | 2014      | Livers     | DD          | 10            | 0             | 0            | Yes           | All transplan  | No            |                | 0            |
| 28 | Deng JF, Geng L, Qian YG, et al. The Role of Toll-Li     | 2007      | Livers     |             | 66            | 0             | 0            | No            |                | No            |                | 0            |
| 29 | Dong J, Zhu Y, Ma F, et al. Conditional disease-free     | 2016      | Livers     |             | 384           | 2003          | 2014         | Yes           | The study wa   | No            |                | 0            |
| 30 | Dong JY, Yin H, Li RD, et al. The relationship betwe     | 2011      | Livers     |             | 83            | 2009          | 2009         | No            |                | No            |                | 0            |
| 31 | Duan BW, Lu SC, Lai W, et al. The detection of (tot      | 2015      | Livers     |             | 55            | 1999          | 2010         | Yes           | Prior to the s | No            |                | 0            |
| 32 | Duan BW, Lu SC, Wu JS, et al. Model for end-stage        | 2014      | Livers     |             | 78            | 2004          | 2010         | Yes           | Before the s   | No            |                | 0            |
| 33 | Fan J, Yang GS, Fu ZR, et al. Liver transplantation c    | 2009      | Livers     | DD          | 1074          | 2001          | 2007         | No            |                | Yes           | All of the cad | OT           |
| 34 | Fan J, Zhang X, Ren L, et al. Donor IL-18 rs5744247      | 2015      | Livers     |             | 84            | 2007          | 2011         | Yes           | The study wa   | No            |                | 0            |
| 35 | Feng ZY, Xu X, Zhu SM, et al. Effects of low central     | 2010      | Livers     | DD          | 48            | 2006          | 2008         | Yes           | Under the ap   | No            |                | 0            |
| 36 | Fu BS, Zhang T, Li H, et al. The role of liver transpl   | 2011      | Livers     | DD          | 11            | 2003          | 2008         | No            |                | No            |                | 0            |
| 37 | Fu YW, Wang WG, Zhou HL, et al. Presence of don          | 2006      | Livers     |             | 126           | 1986          | 2000         | Yes           | Approval doc   | No            |                | 0            |
| 38 | Gao F, Ye Q, Wan Q, et al. Distribution and resista      | 2015      | Livers     |             | 17            | 2007          | 2014         | Yes           | À The ethics   | No            |                | 0            |
| 39 | Gao PJ, Gao J, Li Z, et al. Hepatocellular carcinoma     | 2014      | Livers     |             | 340           | 2004/7        | 2011/12      | Yes           | The study wa   | No            |                | 0            |
| 40 | Gao S, Lin BY, Yang Z, et al. Role of overexpressio      | 2014      | Livers     |             | 160           | 2001/1        | 2010/1       | Yes           | This study wa  | No            |                | 0            |
| 41 | Gao Y, Ren H, Meng F, et al. Pathological roles of i     | 2016      | Livers     |             | 15            | 2010/6        | 2014/10      | Yes           | Ethics approv  | Yes           | No organ tra   | 0            |
| 42 | Gao Y, Zhang M, Li J, et al. Circulating FoxP3+ regu     | 2015      | Livers     |             | 12            | 2010/6        | 2013/6       | Yes           | The study pro  | Yes           | Organ donati   | 0            |
| 43 | Gao YJ, Zhang M, Jin B, et al. A clinical-pathologica    | 2014      | Livers     |             | 253           | 2005/7        | 2010/6       | Yes           | The study pro  | Yes           | Organ donati   | 0            |
| 44 | Gu L, Jin W, Kan L, et al. A Retrospective Study to      | 2014      | Livers     |             | 190           | 2007/7        | 2009/3       | No            |                | No            |                | 0            |

|    | B                                                         | C    | D      | E  | F   | G       | H       | I   | J               | K   | L               | M   |
|----|-----------------------------------------------------------|------|--------|----|-----|---------|---------|-----|-----------------|-----|-----------------|-----|
| 45 | Gu L, Yu YC. Clinical outcome of dental implants pl       | 2011 | Livers | DD | 13  | 2005/1  | 2007/1  | No  |                 | Yes | No organs fr    | 0   |
| 46 | Gu LH, Fang H, Li FH, et al. Prediction of early hepa     | 2012 | Livers |    | 2   | 2006/10 | 2010/12 | Yes | The study wa    | No  |                 | 0   |
| 47 | Guo W, Sheng J, Gu Y, et al. Analysis and forecast        | 2014 | Livers |    | 249 | 2007/1  | 2009/1  | No  |                 | No  |                 | 0   |
| 48 | Guo Z, He X, Wu L, et al. Model for end-stage liver       | 2010 | Livers | DD | 117 | 1998/1  | 2007/1  | Yes | Informed cor    | No  |                 | 0   |
| 49 | Han ZB, Zhong L, Teng MJ, et al. Identification of r      | 2012 | Livers |    | 165 | 2002/1  | 2007/12 | Yes | All patients v  | No  |                 | 0   |
| 50 | Hei Z, Chi X, Cheng N, et al. Upregulation of TLR2/       | 2010 | Livers | DD | 18  | 0       | 0       | Yes | This study wa   | No  |                 | MX  |
| 51 | Hu B, Gao DJ, Yu FH, et al. Endoscopic stenting for       | 2011 | Livers | DD | 13  | 2008/7  | 2010/6  | Yes | The study pro   | No  |                 | 0   |
| 52 | Hu J, Wang Z, Fan J, et al. Genetic variations in pla     | 2011 | Livers | DD | 209 | 2004/1  | 2008/6  | Yes | The study pro   | No  |                 | 0   |
| 53 | Hu J, Xie X, Li Y, et al. A novel noninvasive method      | 2012 | Hearts | DD | 47  | 2001    | 2010    | Yes | The study wa    | No  |                 | 0   |
| 54 | Hu WY, Wu LQ, Su Z, et al. Expression of human le         | 2014 | Livers | DD | 59  | 2005    | 2009    | Yes | The present s   | No  |                 | 0   |
| 55 | Hu XX, Yan LN. Retrospective analysis of prognostic       | 2011 | Livers | DD | 24  | 1999/2  | 2010/2  | Yes | All the liver g | Yes | All the liver g | DBD |
| 56 | Hu Y, Zhang X, Liu Y, et al. APACHE IV is superior to     | 2013 | Livers | DD | 195 | 2006    | 2009    | No  |                 | No  |                 | OT  |
| 57 | Hu Z, Zhou J, Li Z, et al. Salvage liver transplantati    | 2014 | Livers | DD | 53  | 2004    | 2012    | Yes | Ethical appro   | No  |                 | 0   |
| 58 | Hu Z, Zhou J, Li Z, et al. Time interval to recurrence    | 2015 | Livers | DD | 62  | 2001    | 2012    | Yes | This single-c   | No  |                 | 0   |
| 59 | Huang L, Li GM, Zhu JY, et al. Efficacy of sorafenib      | 2012 | Livers | DD | 97  | 2008    | 2010    | No  |                 | No  |                 | 0   |
| 60 | Huang M, Shan H, Jiang Z, et al. The use of corona        | 2006 | Livers | DD | 430 | 2003/11 | 2005/9  | Yes | Written infor   | No  |                 | 0   |
| 61 | Huang Q, Zhai RY, Dai DK. Interventional Treatment        | 2007 | Livers | DD | 11  | 2004/6  | 2006/9  | No  |                 | No  |                 | 0   |
| 62 | Huijun M, Ji Z, Ping X, et al. Linkage disequilibrium     | 2013 | Lungs  | DD | 106 | 2004/8  | 2011/7  | Yes | All protocols   | No  |                 | 0   |
| 63 | Jiang GQ, Bai DS, Chen P, et al. Starting hemoglob        | 2011 | Livers | DD | 102 | 1996/7  | 2009/7  | No  |                 | No  |                 | 0   |
| 64 | Jiang T, Li C, Duan B, et al. Risk factors for and ma     | 2016 | Livers | DD | 528 | 2007/1  | 2014/1  | Yes | This study wa   | No  |                 | 0   |
| 65 | Jiang T, Liu S, Xiao X, et al. Diagnosis of rejection a   | 2012 | Livers | DD | 66  | 0       | 0       | No  |                 | No  |                 | 0   |
| 66 | Jiang Z, Chen Y, Feng X, et al. Recipient cytotoxic T     | 2013 | Livers | DD | 335 | 2005/1  | 2010/12 | Yes | Written infor   | No  |                 | 0   |
| 67 | Jiang Z, Feng X, Zhang W, et al. Recipient cytotoxic      | 2007 | Livers | DD | 167 | 2003/1  | 2005/12 | No  |                 | No  |                 | 0   |
| 68 | Jiao ZY, Jiao Z. Prophylaxis of Recurrent Hepatitis B     | 2007 | Livers | DD | 85  | 1999/1  | 2005/9  | No  |                 | No  |                 | 0   |
| 69 | Jin R, Duan H, Zhao C, et al. Pharmacokinetics of C       | 2012 | Hearts | DD | 5   | 0       | 0       | No  |                 | No  |                 | 0   |
| 70 | Jin Z, Zhang WX, Chen B, et al. Stepwise regressio        | 2009 | Livers | DD | 29  | 2006/6  | 2007/3  | Yes | All cases sign  | No  |                 | 0   |
| 71 | Ju W, Chen M, Guo Z, et al. Allografts positive for       | 2013 | Livers | DD | 23  | 2007/1  | 2010/2  | Yes | All transplan   | No  |                 | 0   |
| 72 | Ju WQ, Guo ZY, Liang WH, et al. Sirolimus convers         | 2012 | Livers | DD | 25  | 2005/10 | 2008/12 | Yes | The study pro   | No  |                 | 0   |
| 73 | Ju WQ, Guo ZY, Ling X, et al. Twenty-four hour ste        | 2012 | Livers | DD | 82  | 2006/9  | 2008/9  | Yes | The study pro   | No  |                 | 0   |
| 74 | Kong HY, Huang SQ, Zhu SM, et al. Role of anhepat         | 2013 | Livers | DD | 50  | 0       | 0       | Yes | The study wa    | No  |                 | 0   |
| 75 | Kong HY, Wen XH, Huang SQ, et al. Epsilon-aminod          | 2014 | Livers | DD | 59  | 0       | 0       | Yes | The study wa    | No  |                 | 0   |
| 76 | Lai MC, Yang Z, Zhou L, et al. Long non-coding RNA        | 2012 | Livers | DD | 60  | 2003/1  | 2005/12 | Yes | Our work wa     | No  |                 | 0   |
| 77 | Lei J, Yan L. Outcome Comparisons Among the Har           | 2013 | Livers | DD | 197 | 2001/4  | 2012/8  | Yes | Each organ d    | Yes | No prisoners    | 0   |
| 78 | Lei JY, Wang WT, Yan LN. Hangzhou criteria for liv        | 2014 | Livers | DD | 278 | 2000/8  | 2010/12 | Yes | All of the livi | Yes | The donors v    | 0   |
| 79 | Lei JY, Yan LN, Zhu JQ, et al. Hepatocellular Carcinc     | 2015 | Livers | DD | 53  | 2009/1  | 2014/8  | No  |                 | No  |                 | 0   |
| 80 | Li C, Zhang F, Zhang W, et al. Feasibility of 125I br     | 2010 | Livers | DD | 8   | 2006/7  | 2009/12 | Yes | All patients g  | No  |                 | 0   |
| 81 | Li C, Zhu WJ, Wen TF, et al. Child-Pugh A Hepatitis       | 2014 | Livers | DD | 39  | 2007/1  | 2012/12 | Yes | All transplan   | No  |                 | 0   |
| 82 | Li D, Lu W, Zhu JY, et al. Population pharmacokinet       | 2007 | Livers | DD | 104 | 2004/7  | 2006/8  | Yes | The study wa    | No  |                 | 0   |
| 83 | Li D, Zhu JY, Gao J, et al. Polymorphisms of tumor        | 2007 | Livers | DD | 70  | 2004/7  | 2006/7  | Yes | The study wa    | No  |                 | 0   |
| 84 | Li F, Yang M, Li B, et al. Initial clinical results of or | 2007 | Livers | DD | 7   | 2001/4  | 2006/4  | Yes | All 7 donated   | Yes | All 7 donated   | 0   |
| 85 | Li H, He JW, Fu BS, et al. Immunosuppressant-rela         | 2013 | Livers | DD | 175 | 2004/1  | 2007/12 | Yes | The study pro   | Yes | All organ dor   | 0   |
| 86 | Li H, Li B, Wei Y, et al. Preoperative transarterial c    | 2015 | Livers | DD | 450 | 2001/1  | 2013/12 | No  |                 | No  |                 | 0   |
| 87 | Li H, Li J, Wang Y, et al. Proteomic analysis of efflu    | 2012 | Hearts | DD | 5   | 0       | 0       | Yes | The study pro   | Yes | Five donors     | DBD |
| 88 | Li H, Wang S, Wang G, et al. Yes-associated protei        | 2014 | Livers | DD | 105 | 2004/6  | 2009/9  | Yes | The present s   | No  |                 | 0   |

|     | B                                                       | C    | D      | E  | F   | G       | H       | I   | J               | K   | L              | M   |
|-----|---------------------------------------------------------|------|--------|----|-----|---------|---------|-----|-----------------|-----|----------------|-----|
| 89  | Li H, Xie HY, Zhou L, et al. Copy number variation in   | 2012 | Livers |    | 266 | 2006/1  | 2009/3  | Yes | This study wa   | No  |                | 0   |
| 90  | Li J, Liu B, Yan LN, et al. Reversal of Graft Steatosis | 2009 | Livers | DD | 73  | 2003/7  | 2008/2  | Yes | The study wa    | Yes | No prisoners   | DBD |
| 91  | Li MR, Chen GH, Cai CJ, et al. High hepatitis B virus   | 2011 | Livers |    | 322 | 2004/1  | 2009/1  | No  |                 | No  |                | 0   |
| 92  | Li Q, Yao G, Ge Q, et al. Relevant risk factors affect  | 2010 | Livers |    | 96  | 2004/8  | 2006/5  | No  |                 | No  |                | 0   |
| 93  | Li QY, Qin YS, Ling Q, et al. No therapeutic ERCP in    | 2011 | Livers | DD | 592 | 2004/5  | 2010/6  | Yes | Each organ d    | No  |                | 0   |
| 94  | Li RD, Sun Z, Dong JY, et al. A quantitative assessm    | 2013 | Livers |    | 194 | 2009    | 2010    | Yes | All persons h   | No  | Included in th | 0   |
| 95  | Li T, Chen ZS, Zeng FJ, et al. Impact of early biliary  | 2007 | Livers | DD | 84  | 2002/11 | 2005/6  | No  |                 | No  |                | 0   |
| 96  | Li WX, Li Z, Gao PJ, et al. Histological differentiat   | 2014 | Livers | DD | 107 | 2002    | 2011    | Yes | Informed cor    | Yes | The decease    | 0   |
| 97  | Li X, Li X, Chi X, et al. Ulinastatin ameliorates acute | 2015 | Livers |    | 60  | 0       | 0       | Yes | Informed cor    | No  |                | 0   |
| 98  | Li Y, Shi Y, Chen J, et al. Association of polymorphi   | 2012 | Livers |    | 200 | 2000/4  | 2011/3  | Yes | All the liver t | No  |                | 0   |
| 99  | Li Y, Zhu M, Xia Q, et al. Urinary neutrophil gelatin   | 2012 | Livers | DD | 11  | 2007/12 | 2008/12 | Yes | After the stu   | No  |                | 0   |
| 100 | Li Y, Zou Y, Cai B, et al. The associations of IL-18 se | 2012 | Livers |    | 155 | 2000/4  | 2008/3  | Yes | All liver trans | No  |                | 0   |
| 101 | Liang TB, Bai XL, Li DL, et al. Early Postoperative H   | 2007 | Livers |    | 261 | 2003/1  | 2005/12 | No  |                 | No  |                | 0   |
| 102 | Liang TB, Li DL, Liang L, et al. Intraoperative blood   | 2008 | Livers |    | 37  | 2006/1  | 2006/12 | Yes | The clinical s  | No  |                | 0   |
| 103 | Liang TB, Li JJ, Li DL, et al. Intraoperative blood sal | 2010 | Livers |    | 45  | 2005/12 | 2006/10 | Yes | Because of t    | No  |                | 0   |
| 104 | Lianghui G, Shusen Z, Tingbo L, et al. Deferred vers    | 2004 | Livers |    | 89  | 1999/1  | 2003/6  | No  |                 | No  |                | 0   |
| 105 | Lin MJ, Yang YL, Yu Q, et al. Value of percutaneous     | 2016 | Livers |    | 17  | 2008/4  | 2013/1  | Yes | This study wa   | No  |                | 0   |
| 106 | Ling Q, Xie H, Lu D, et al. Association between don     | 2013 | Livers |    | 125 | 2006/11 | 2009/7  | Yes | Informed cor    | Yes | No donor liv   | 0   |
| 107 | Ling Q, Xu X, Li J, et al. A new serum cystatin C-bas   | 2008 | Livers | DD | 60  | 2006/6  | 2007/1  | Yes | Informed cor    | No  |                | 0   |
| 108 | Ling Q, Xu X, Wang K, et al. Donor PPAR? Gene Pol       | 2015 | Livers | DD | 176 | 2010/1  | 2012/10 | Yes | This study wa   | Yes | No donororg    | 0   |
| 109 | Ling Q, Xu X, Wei Q, et al. Downgrading MELD imp        | 2012 | Livers |    | 189 | 2001/1  | 2010/6  | Yes | Informed cor    | No  |                | 0   |
| 110 | Ling Q, Xu X, Wei Q, et al. Impact of preexisting di    | 2011 | Livers | DD | 48  | 2003/9  | 2007/5  | Yes | Informed co     | No  |                | 0   |
| 111 | Liu B, Teng F, Fu H, et al. Excessive intraoperative    | 2015 | Livers | DD | 479 | 2001/1  | 2012/12 | Yes | Thisstudy wa    | No  |                | 0   |
| 112 | Liu C, Shang YF, Zhang XF, et al. Co-administration     | 2009 | Livers |    | 30  | 2000    | 2006    | Yes | After the stu   | No  |                | 0   |
| 113 | Liu CZ, Hu SY, Jin B, et al. Hemodialysis-induced hy    | 2008 | Livers |    | 5   | 0       | 0       | Yes | After obtaini   | No  |                | 0   |
| 114 | Liu D, Huang P, Li X, et al. Using inflammatory and     | 2014 | Livers | DD | 28  | 0       | 0       | Yes | All study er    | No  | OT             | 0   |
| 115 | Liu D, Luo G, Luo C, et al. Changes in the concentra    | 2015 | Livers |    | 28  | 0       | 0       | Yes | This study wa   | No  |                | 0   |
| 116 | Liu J, Yan J, Wan Q, et al. The risk factors for tuber  | 2014 | Livers | DD | 4   | 2000/1  | 2013/8  | Yes | The study pro   | No  | OT             |     |
| 117 | Liu S, Fan J, Wang X, et al. Intraoperative Cryoprec    | 2013 | Livers | DD | 356 | 2005/1  | 2010/12 | Yes | National legi   | No  |                | DCD |
| 118 | Liu S, Wang X, Lu Y, et al. The effects of intraopera   | 2013 | Livers | DD | 389 | 2003/1  | 2010/12 | Yes | National legi   | No  |                | 0   |
| 119 | Liu S, Xing T, Sheng T, et al. The reduction rate of s  | 2014 | Livers | DD | 232 | 2007/1  | 2011/12 | No  |                 | No  |                | DCD |
| 120 | Liu XX, Xu BM, Chen H, et al. Limited Sampling Stra     | 2016 | Livers |    | 28  | 0       | 0       | Yes | The study pro   | No  |                | 0   |
| 121 | Liu ZN, Wang WT, Yan LN. De Novo Malignancies a         | 2015 | Livers | DD | 6   | 2002/4  | 2009/3  | Yes | All liver graft | No  |                | DBD |
| 122 | Lu D, Xu X, Wang J, et al. The influence of a conter    | 2014 | Livers | DD | 184 | 2007/1  | 2010/1  | Yes | Institutional   | Yes | The liver don  | DCD |
| 123 | Lu H, He J, Wu Z, et al. Assessment of Microbiome       | 2013 | Livers |    | 12  | 2011/3  | 2011/12 | No  |                 | No  |                | 0   |
| 124 | Lu NN, Huang Q, Wang JF, et al. Non-anastomotic         | 2012 | Livers |    | 42  | 2002/1  | 2011/1  | No  |                 | No  |                | 0   |
| 125 | Lu Q, Zhong XF, Huang ZX, et al. Role of contrast-e     | 2012 | Livers |    | 45  | 2005/1  | 2011/1  | Yes | This study wa   | No  |                | 0   |
| 126 | Luo A, Wan Q, Ye Q, et al. The clinical manifestati     | 2014 | Livers |    | 31  | 2007/1  | 2014/8  | Yes | The present s   | No  |                | 0   |
| 127 | Luo A, Zhong Z, Wan Q, et al. The distribution and      | 2016 | Livers |    | 15  | 2003/1  | 2015/7  | Yes | The ethics co   | No  |                | 0   |
| 128 | Luo YL, Yang XL, Cui JB, et al. Health-related qualit   | 2012 | Livers |    | 55  | 2009    | 2010    | Yes | Transplantat    | No  |                | 0   |
| 129 | Lv Z, Cai X, Weng X, et al. Tumor-stroma ratio is a     | 2015 | Livers |    | 112 | 2006/1  | 2013/12 | Yes | All patients s  | No  |                | 0   |
| 130 | Lv Z, Weng X, Du C, et al. Downregulation of HDAC       | 2016 | Livers |    | 69  | 2007/3  | 2013/3  | Yes | Informed cor    | No  |                | 0   |
| 131 | Lyu SQ, Ren J, Zheng RQ, et al. Contrast-enhanced       | 2015 | Livers | DD | 98  | 2004/4  | 2014/5  | Yes | This study wa   | No  |                | 0   |
| 132 | Mao W, Chen J, Zheng M, et al. Initial experience d     | 2013 | Lungs  |    | 100 | 2002/6  | 2010/12 | No  |                 | No  |                | DBD |



|     | B                                                      | C    | D      | E  | F   | G       | H       | I   | J             | K   | L            | M         |
|-----|--------------------------------------------------------|------|--------|----|-----|---------|---------|-----|---------------|-----|--------------|-----------|
| 133 | Mao W, Hu Y, Lou Y, et al. Immature platelet fract     | 2015 | Livers |    | 30  | 2012    | 2013    | Yes | The study wa  | No  |              | 0         |
| 134 | Mao WJ, Chen JY, Zheng MF, et al. Lung transplant      | 2011 | Lungs  |    | 5   | 2002/9  | 2010/12 | Yes | Lung transpla | No  |              | 0         |
| 135 | Men TY, Wang JN, Li H, et al. Prevalence of multidi    | 2013 | Livers |    | 100 | 2007/4  | 2010/12 | Yes | The protocol  | No  |              | 0         |
| 136 | Minmin S, Zhidong G, Hao C, et al. Correlation betw    | 2010 | Livers | DD | 24  | 0       | 0       | Yes | This study pr | No  |              | 0         |
| 137 | Mu HJ, Xie P, Chen JY, et al. Association of TNF-?,    | 2014 | Livers |    | 113 | 2004/12 | 2012/11 | Yes | All protocols | Yes | We did not u | 0         |
| 138 | Niu YJ, Shen ZY, Xu C, et al. Establishment of tacro   | 2013 | Livers |    | 86  | 2009/1  | 2011/1  | No  |               | No  |              | 0         |
| 139 | Pan C, Shi Y, Zhang JJ, et al. Single-Center Experier  | 2009 | Livers |    | 253 | 1998/9  | 2007/7  | No  |               | Yes | No prisoners | 0         |
| 140 | Pan C, Wang C, Pan W, et al. Usefulness of real-tir    | 2011 | Hearts | DD | 95  | 2005/1  | 2009/2  | Yes | The study co  | No  |              | 0         |
| 141 | Pan L, Zhang W, Zhang J, et al. The analysis of CD4    | 2012 | Livers |    | 31  | 0       | 0       | Yes | Our study wa  | No  |              | 0         |
| 142 | Pei F, Shang K, Jiang B, et al. Clinicopathologic stu  | 2013 | Livers |    | 54  | 2000/8  | 2004/8  | No  |               | No  |              | 0         |
| 143 | Qin J, Fang Y, Dong Y, et al. Radiological and clinic  | 2012 | Livers |    | 25  | 2003/1  | 2010/1  | Yes | Approval was  | No  |              | 0         |
| 144 | Qin J, Xu J, Dong Y, et al. High-resolution CT findin  | 2012 | Livers |    | 453 | 2000/1  | 2011/1  | No  |               | No  |              | 0         |
| 145 | Qin Z, Linghu EQ. New endoscopic classification sy     | 2014 | Livers | DD | 78  | 2006/5  | 2011/9  | No  |               | No  |              | 0         |
| 146 | Qiu Y, Zhu X, Wang W, et al. Nutrition Support Wit     | 2009 | Livers |    | 65  | 2002/1  | 2005/7  | Yes | This randomi  | No  |              | 0         |
| 147 | Qu W, Zhu ZJ, Sun LY, et al. Salvage liver transplan   | 2015 | Livers |    | 108 | 2000/4  | 2011/6  | Yes | This study wa | No  |              | 0         |
| 148 | Ran JH, Zhang SN, Liu J, et al. In-hospital and foll   | 2016 | Livers |    | 34  | 2006/5  | 2010/12 | Yes | Ä The study v | Yes | researchers  | DCD       |
| 149 | Ren J, Lu MD, Zheng RQ, et al. Evaluation of the m     | 2009 | Livers |    | 25  | 2007/2  | 2007/7  | Yes | Informed cor  | No  |              | 0         |
| 150 | Ren J, Zheng BW, Wang P, et al. Revealing Impaire      | 2013 | Livers |    | 42  | 2007/2  | 2009/12 | Yes | The study wa  | No  |              | 0         |
| 151 | Sha J, Tao Y, Li D, et al. Outcome of heart transpla   | 2008 | Hearts | DD | 10  | 2004/5  | 2006/2  | No  |               | No  |              | 0         |
| 152 | Shaoyin D, Yongmei Y, Tong S, et al. Follow-up exa     | 2012 | Hearts | DD | 12  | 2006/6  | 2011/9  | Yes | was approve   | No  |              | 0         |
| 153 | Shen JY, Li C, Wen TF, et al. Liver transplantation v  | 2016 | Livers |    | 102 | 2001/1  | 2014/12 | Yes | Written infor | No  |              | 0         |
| 154 | Sheng H, Lu Y, Chen H. Ocular Complications of He      | 2008 | Hearts | DD | 138 | 2000/5  | 2005/10 | Yes | This study wa | No  |              | 0         |
| 155 | Sheng L, Jun S, Jianfeng L, et al. The effect of sirol | 2015 | Livers | DD | 127 | 2008    | 2013    | No  |               | No  |              | DCD       |
| 156 | Shi SH, Kong HS, Xu J, et al. Multidrug resistant gra  | 2009 | Livers |    | 475 | 2003/1  | 2006/12 | Yes | This study wa | No  |              | 0         |
| 157 | Shi Y, Li Y, Tang J, et al. Influence of CYP3A4, CYP3  | 2013 | Livers |    | 216 | 2000/4  | 2008/3  | Yes | This study wa | No  |              | 0         |
| 158 | Shi Z, Yan L, Zhao J, et al. Prevention and treatmer   | 2010 | Livers | DD | 275 | 1999/2  | 2007/12 | Yes | Written, info | No  |              | BDD       |
| 159 | Song SH, Li XX, Wan QQ, et al. Risk factors for mor    | 2014 | Livers |    | 51  | 2007/1  | 2014/5  | Yes | The present s | No  |              | 0         |
| 160 | Su H, Liu Z, Sun Y, et al. Efficacy and safety of low  | 2015 | Livers |    | 31  | 2005/1  | 2010/12 | Yes | This study wa | No  |              | 0         |
| 161 | Sun B, Li XY, Gao JW, et al. Population pharmacoki     | 2010 | Livers |    | 124 | 2000    | 2007    | Yes | The study wa  | No  |              | 0         |
| 162 | Sun H, Teng M, Liu J, et al. FOXM1 expression pred     | 2011 | Livers | DD | 5   | 2001/10 | 2009/4  | Yes | Ethical appro | No  |              | 0         |
| 163 | Sun J, Cao G, Zhang L, et al. Human cytomegalovir      | 2012 | Livers |    | 69  | 2002/1  | 2009/6  | Yes | The study wa  | No  |              | 0         |
| 164 | Sun XY, Dong JH, Qin K, et al. Single center study o   | 2016 | Livers | DD | 6   | 2011/1  | 2013/12 | Yes | with the app  | Yes | The donation | DCD       |
| 165 | Sun Y, Yin S, Xie H, et al. Immunophenotypic shift     | 2009 | Livers |    | 62  | 0       | 0       | Yes | This study wa | No  |              | 0         |
| 166 | Tu Z, Xiang P, Xu X, et al. DCD liver transplant infec | 2016 | Livers | DD | 257 | 2010/10 | 2015/5  | Yes | Our study fol | No  | Donor factor | DCD       |
| 167 | Vitale A, Cucchetti A, Qiao GL, et al. Is resectable l | 2014 | Livers |    | 441 | 2000/1  | 2011/12 | No  |               | No  |              | 0         |
| 168 | Wan P, Xia Q, Zhang JJ, et al. Liver transplantation   | 2014 | Livers | DD | 114 | 2007/1  | 2010/12 | Yes | Organ donati  | No  |              | DBD + DCD |
| 169 | Wan P, Zhang J, Long X, et al. Serum levels of pred    | 2014 | Livers | DD | 189 | 2007/1  | 2010/6  | Yes | Organ donati  | No  |              | DBD + DCD |
| 170 | Wan Q, Ye Q, Su T, et al. The epidemiology and dis     | 2014 | Livers |    | 35  | 2002/1  | 2014/4  | Yes | upon approva  | No  |              | 0         |
| 171 | Wan QQ, Ye QF, Ming YZ, et al. The risk factors fo     | 2013 | Livers | DD | 43  | 2002/1  | 2012/1  | Yes | The present s | No  |              | 0         |
| 172 | Wang B, He HK, Cheng B, et al. Effect of low centr     | 2013 | Livers | DD | 65  | 2003/6  | 2009/12 | Yes | This study wa | No  |              | 0         |
| 173 | Wang CM, Li X, Song S, et al. Newly designed y-co      | 2012 | Livers | DD | 10  | 2000/7  | 2010/7  | Yes | Study approv  | No  |              | 0         |
| 174 | Wang E, Nie Y, Zhao Q, et al. Circulating miRNAs r     | 2013 | Hearts | DD | 7   | 2011/7  | 2011/8  | Yes | The protocol  | No  |              | 0         |
| 175 | Wang G, Yang J, Li M, et al. Liver transplant may in   | 2013 | Livers |    | 60  | 2003/10 | 2008/12 | Yes | The study wa  | No  |              | 0         |
| 176 | Wang GY, Jiang N, Yi HM, et al. Pretransplant elev     | 2016 | Livers | DD | 41  | 2007/10 | 2009/1  | No  |               | No  |              | DCD       |

|     | B                                                     | C    | D      | E  | F   | G       | H       | I   | J              | K   | L              | M       |
|-----|-------------------------------------------------------|------|--------|----|-----|---------|---------|-----|----------------|-----|----------------|---------|
| 177 | Wang GY, Yang Y, Li H, et al. A scoring model base    | 2011 | Livers |    | 101 | 2003/10 | 2009/6  | No  | À              | No  |                | 0       |
| 178 | Wang J, Liu JJ, Liang YY, et al. Could diffusion-weig | 2012 | Livers |    | 55  | 2005/4  | 2009/11 | Yes | Informed cor   | No  |                | 0       |
| 179 | Wang J, Yang W, Huang Q, et al. Interventional tre    | 2015 | Livers | DD | 12  | 2007/7  | 2013/4  | Yes | This study wa  | No  |                | 0       |
| 180 | Wang JF, Zhai RY, Wei BJ, et al. Percutaneous Intra   | 2006 | Livers |    | 10  | 2004/4  | 2005/5  | No  |                | No  |                | 0       |
| 181 | Wang K, Zhu ZJ, Zheng H, et al. Protective hepatiti   | 2012 | Livers |    | 26  | 2006/11 | 2007/2  | Yes | All subjects s | No  |                | 0       |
| 182 | Wang L, Li N, Wang MX, et al. Benefits of minimiz     | 2015 | Livers | DD | 206 | 2010/1  | 2012    | Yes | The study wa   | No  |                | 0       |
| 183 | Wang P, Song W, Li H, et al. Association between c    | 2015 | Livers |    | 76  | 2001/7  | 2012/8  | Yes | Informed cor   | No  |                | 0       |
| 184 | Wang P, Wang C, Li H, et al. Impact of age on the     | 2015 | Livers | DD | 290 | 2001/1  | 2011/12 | Yes | This study wa  | No  |                | 0       |
| 185 | Wang S, Li J, Xie A, et al. Dynamic changes in Th1,   | 2011 | Hearts | DD | 24  | 0       | 0       | Yes | the study wa   | No  |                | 0       |
| 186 | Wang SY, Tang HM, Chen GQ, et al. Effect of ursod     | 2012 | Livers | DD | 112 | 2005/5  | 2008/4  | Yes | Informed cor   | Yes | DCD livers w   | DCD     |
| 187 | Wang W, Ye Y, Wang T, et al. Prognostic predictio     | 2016 | Livers |    | 248 | 2002/1  | 2012/12 | Yes | All participar | No  |                | 0       |
| 188 | Wang WL, Jin J, Zheng SS, et al. Tacrolimus dose r    | 2006 | Livers | DD | 50  | 2004/7  | 2005/3  | No  |                | No  |                | 0       |
| 189 | Wang Y, Liu Y, Han R, et al. Monitoring of CD95 an    | 2010 | Livers | DD | 44  | 2004    | 2004    | Yes | The present s  | Yes | All recipients | 0       |
| 190 | Wang Y, Liu Y, Han R, et al. Temporal evolution of    | 2008 | Livers | DD | 20  | 0       | 0       | No  |                | No  |                | 0       |
| 191 | Wang Y, Liu Y, Han R, et al. Hemostatic variation d   | 2008 | Livers | DD | 20  | 2004    | 2004    | Yes | The present s  | No  |                | 0       |
| 192 | Wang Y, Liu Y, Zhang Y, et al. The role of the CD95   | 2006 | Livers | DD | 30  | 2003    | 2004    | No  |                | No  |                | 0       |
| 193 | Wang Y, Zhang M, Liu ZW, et al. The ratio of circul   | 2014 | Livers | DD | 38  | 0       | 0       | Yes | The study pro  | No  |                | 0       |
| 194 | Wang YI, Li G, Zhang Y, et al. The Expression of vo   | 2007 | Livers |    | 20  | 2004    | 2004    | No  |                | No  |                | 0       |
| 195 | Wang YL, Li G, Wu D, et al. Analysis of Alpha-fetop   | 2007 | Livers |    | 30  | 2004    | 2004    | No  |                | No  |                | 0       |
| 196 | Wang YL, Tang ZQ, Gao W, et al. Influence of Th1,     | 2003 | Livers |    | 25  | 0       | 0       | No  |                | No  |                | 0       |
| 197 | Wang YL, Zhang YY, Zhou YL, et al. T-helper and T-    | 2004 | Livers |    | 30  | 2002    | 2002    | No  |                | No  |                | 0       |
| 198 | Wang Z, He JJ, Liu XY, et al. The evaluation of ente  | 2015 | Livers | DD | 92  | 0       | 0       | Yes | The study wa   | No  | The liver was  | DCD     |
| 199 | Wang Z, Liao J, Wu S, et al. Recipient C6 rs9200 ge   | 2016 | Livers |    | 71  | 2007/7  | 2012/3  | Yes | This research  | No  |                | 0       |
| 200 | Wang Z, Shi B, Jin H, et al. Low-dose of tacrolimus   | 2009 | Livers |    | 25  | 0       | 0       | Yes | This study wa  | No  |                | 0       |
| 201 | Wang Z, Wu S, Chen D, et al. Influence of TLR4 rs1    | 2014 | Livers |    | 86  | 2007/7  | 2011/2  | Yes | The protocol   | No  |                | 0       |
| 202 | Wang ZX, Song SH, Teng F, et al. A single-center re   | 2010 | Livers | DD | 251 | 2001/12 | 2007/12 | No  |                | No  |                | 0       |
| 203 | Wang ZX, Yan LN, Wang WT, et al. Impact of Pretr      | 2007 | Livers |    | 42  | 1999/12 | 2005/11 | No  |                | No  |                | 0       |
| 204 | Wei Q, Xu X, Wang C, et al. Efficacy and safety of a  | 2016 | Livers | DD | 166 | 2009/4  | 2011/6  | Yes | Each organ d   | No  |                | DCD, OT |
| 205 | Wei Y, Zhang L, Lin H, et al. Factors Related to Pos  | 2006 | Livers |    | 82  | 1999    | 2002    | No  |                | No  |                | 0       |
| 206 | Wen O, Li X, Wan Q, et al. The risk factors for mor   | 2015 | Livers |    | 37  | 2002/1  | 2013/9  | Yes | The present s  | No  |                | 0       |
| 207 | Wu B, Wu H, Chen J, et al. Comparative proteomic      | 2013 | Livers | DD | 5   | 2008/11 | 2009/3  | Yes | Written infor  | No  |                | DCD     |
| 208 | Wu CZ, Ni XJ, Zheng SL, et al. A fast SSP-PCR meth    | 2009 | Livers |    | 59  | 0       | 0       | No  |                | No  |                | 0       |
| 209 | Wu J, Xu X, Liang T, et al. Long-term outcome of co   | 2008 | Livers |    | 69  | 1999/1  | 2006/10 | Yes | Each organ d   | No  |                | 0       |
| 210 | Wu J, Zhu SM, He HL, et al. Plasma propofol conce     | 2005 | Livers |    | 10  | 0       | 0       | Yes | The study wa   | No  |                | 0       |
| 211 | Wu L, Chen L, Zhou L, et al. Association of interleu  | 2011 | Livers |    | 125 | 2004    | 2008    | Yes | Informed cor   | No  |                | 0       |
| 212 | Wu L, Hu A, Tam N, et al. Salvage liver transplanta   | 2012 | Livers | DD | 339 | 2004    | 2008    | Yes | Prior to the s | No  |                | 0       |
| 213 | Wu L, Tam N, Deng R, et al. Steroid-resistant acute   | 2014 | Livers | DD | 962 | 2004    | 2012    | Yes | Prior to the s | No  |                | 0       |
| 214 | Wu L, Xu X, Shen J, et al. MDR1 gene polymorphisr     | 2007 | Livers |    | 99  | 2003/2  | 2006/9  | No  |                | No  |                | 0       |
| 215 | Wu L, Zhang J, Guo Z, et al. Diagnosis and treatme    | 2011 | Livers |    | 8   | 2000/1  | 2007/12 | Yes | Each organ d   | No  |                | 0       |
| 216 | Wu L, Zhang J, Guo Z, et al. Hepatic artery thromb    | 2011 | Livers |    | 726 | 2004    | 2009    | Yes | Before the st  | No  |                | 0       |
| 217 | Wu LM, Xie HY, Zhou L, et al. A Single Nucleotide F   | 2009 | Livers |    | 93  | 2003/2  | 2006/2  | Yes | This study pr  | No  |                | 0       |
| 218 | Wu LM, Yang Z, Zhou L, et al. Identification of hist  | 2010 | Livers |    | 43  | 2003    | 2005    | Yes | The study pro  | No  |                | 0       |
| 219 | Wu LM, Zhang F, Xie HY, et al. MMP2 promoter po       | 2008 | Livers |    | 93  | 2003/2  | 2006/2  | Yes | This study wa  | No  |                | 0       |
| 220 | Wu LM, Zhang F, Zhou L, et al. Predictive value of    | 2010 | Livers |    | 65  | 2003    | 2005    | Yes | This study wa  | No  |                | 0       |

|     | B                                                        | C    | D      | E  | F   | G       | H       | I   | J             | K   | L              | M   |
|-----|----------------------------------------------------------|------|--------|----|-----|---------|---------|-----|---------------|-----|----------------|-----|
| 221 | Wu Y, Cai B, Tang J, et al. Tacrolimus may induce t      | 2011 | Livers |    | 94  | 2007    | 2010    | Yes | This study ha | No  |                | 0   |
| 222 | Wu ZW, Lu HF, Wu J, et al. Assessment of the Fec         | 2012 | Livers |    | 74  | 0       | 0       | Yes | The project v | No  |                | 0   |
| 223 | Xia D, Yan LN, Li B, et al. Orthotopic liver transplan   | 2005 | Livers |    | 5   | 2001/4  | 2002/11 | No  |               | No  |                | 0   |
| 224 | Xia D, Yan LN, Xu L, et al. Postoperative Severe Pn      | 2006 | Livers |    | 132 | 1999/2  | 2004/4  | No  |               | No  |                | 0   |
| 225 | Xia W, Ke Q, Wang Y, et al. Donation after cardiac       | 2015 | Livers | DD | 127 | 2010/10 | 2014/4  | Yes | Informed cor  | No  |                | DCD |
| 226 | Xia W, Ke Q, Wang Y, et al. Predictive value of pre      | 2015 | Livers | DD | 302 | 2003/1  | 2013/12 | Yes | Ethical appro | No  |                | 0   |
| 227 | Xia ZW, Jun CY, Hao C, et al. The occurrence of dial     | 2010 | Livers |    | 67  | 2005/5  | 2008/8  | Yes | The study del | No  |                | 0   |
| 228 | Xiao L, Fu ZR, Ding GS, et al. Liver Transplantation     | 2009 | Livers | DD | 244 | 2001/12 | 2006/12 | No  |               | No  |                | 0   |
| 229 | Xiao L, Fu ZR, Ding GS, et al. Prediction of survival    | 2009 | Livers | DD | 137 | 2002/8  | 2007/11 | Yes | None of the c | Yes | None of the    | DCD |
| 230 | Xiao M, Xu X, Zhu H, et al. Efficacy and safety of ba    | 2015 | Livers |    | 268 | 2008/6  | 2011/3  | Yes | Institutional | No  |                | 0   |
| 231 | Xie BX, Zhu YM, Chen C, et al. Outcome of TiNi ste       | 2013 | Lungs  |    | 24  | 2003/1  | 2010/6  | Yes | This study wa | No  |                | 0   |
| 232 | Xie HY, Wang WL, Yao MY, et al. Polymorphisms ir         | 2008 | Livers |    | 186 | 2003    | 2005    | Yes | The local Eth | No  |                | 0   |
| 233 | Xie M, Rao W, Sun LY, et al. Tacrolimus-related se       | 2014 | Livers | DD | 13  | 2007/1  | 2010/12 | Yes | Conduct of o  | No  |                | 0   |
| 234 | Xie M, Rao W, Yang T, et al. Occult hepatitis B viru     | 2015 | Livers |    | 65  | 2008/6  | 2012/6  | Yes | The conduct   | No  |                | 0   |
| 235 | Xie SB, Zhu JY, Ying Z, et al. Prevention and risk fac   | 2010 | Livers | DD | 160 | 2003/10 | 2008/8  | No  |               | No  |                | 0   |
| 236 | Xing T, Huang L, Yu Z, et al. Comparison of Steroid      | 2013 | Livers | DD | 178 | 2003/1  | 2009/12 | Yes | The study wa  | No  |                | 0   |
| 237 | Xing T, Qiu G, Zhong L, et al. Calcitriol reduces the    | 2013 | Livers |    | 75  | 2010/3  | 2011/3  | Yes | The study pro | No  |                | 0   |
| 238 | Xing T, Zhong L, Chen D, et al. Experience of combi      | 2013 | Livers | DD | 133 | 2001/1  | 2009/12 | Yes | The study, a  | No  |                | 0   |
| 239 | Xing T, Zhong L, Qiu G, et al. Evolution of CD4+CD2      | 2014 | Livers |    | 75  | 2010/3  | 2011/3  | No  |               | No  |                | 0   |
| 240 | Xu G, Li LL, Sun ZT, et al. Effects of dexmedetomid      | 2016 | Livers |    | 80  | 2014/12 | 2015/12 | Yes | The study wa  | No  |                | 0   |
| 241 | Xu H, Li W, Xu Z, et al. Evaluation of the right ventr   | 2012 | Livers |    | 30  | 0       | 0       | Yes | After obtaini | No  |                | OT  |
| 242 | Xu J, Shen ZY, Chen XG, et al. A randomized contro       | 2007 | Livers | DD | 60  | 2004/7  | 2004/11 | Yes | The study wa  | Yes | donor livers v | 0   |
| 243 | Xu L, Li X, Xu M, et al. Perioperative use of ECMO d     | 2009 | Lungs  | DD | 9   | 2002    | 2006    | No  |               | No  |                | 0   |
| 244 | Xu L, Xu MQ, Yan LN, et al. Causes of mortality aft      | 2012 | Livers | DD | 472 | 1999/2  | 2009/12 | No  |               | No  |                | 0   |
| 245 | Xu X, Guo HJ, Xie HY, et al. ZIP4, a novel determina     | 2014 | Livers |    | 60  | 2002    | 2009    | Yes | The study pro | Yes | No donor live  | 0   |
| 246 | Xu X, Ke QH, Shao ZX, et al. The value of serum ?-f      | 2009 | Livers |    | 97  | 2004/2  | 2006/12 | No  |               | No  |                | 0   |
| 247 | Xu X, Ling Q, Gao F, et al. Hepatoprotective effects     | 2009 | Livers | DD | 151 | 2003/9  | 2006/1  | Yes | The ethical c | Yes | DONORS gav     | 0   |
| 248 | Xu X, Ling Q, Wu J, et al. A novel prognostic model      | 2007 | Livers | DD | 199 | 2003/1  | 2006/9  | Yes | Each organ c  | No  |                | 0   |
| 249 | Xu X, Ling Q, Zhang M, et al. Outcome of patients        | 2009 | Livers | DD | 32  | 2003/1  | 2006/3  | No  |               | Yes | Informed cor   | 0   |
| 250 | Xu X, Liu X, Ling Q, et al. Artificial Liver Support Sys | 2013 | Livers |    | 171 | 2001/1  | 2009/12 | Yes | This study wa | Yes | No donor live  | 0   |
| 251 | Xu X, Qu K, Wan Y, et al. Tumor existence and tum        | 2014 | Livers |    | 111 | 2002/8  | 2012/3  | Yes | The procedur  | No  |                | 0   |
| 252 | Xu X, Tu Z, Wang B, et al. A novel model for evalua      | 2011 | Livers | DD | 185 | 2006/1  | 2008/12 | Yes | The guideline | Yes | No donor live  | 0   |
| 253 | Xu ZD, Xu HT, Li WW, et al. Influence of preoperati      | 2013 | Livers | DD | 330 | 2005/1  | 2009/12 | No  |               | No  |                | 0   |
| 254 | Xue F, Higgs BW, Huang J, et al. HERC5 is a progn        | 2015 | Livers |    | 21  | 2008    | 2012    | Yes | Informed wr   | Yes | No donor org   | 0   |
| 255 | Xue F, Zhang J, Han L, et al. Immune cell functiona      | 2010 | Livers |    | 79  | 2008/4  | 2009/1  | No  |               | No  |                | 0   |
| 256 | Xue J, Wang L, Chen CM, et al. Acute kidney injury       | 2014 | Lungs  |    | 88  | 2002/9  | 2011/12 | Yes | All transplan | No  |                | 0   |
| 257 | Xue M, Lv C, Chen X, et al. Donor liver steatosis: A     | 2017 | Livers |    | 739 | 2001/4  | 2014/12 | Yes | The study wa  | No  |                | 0   |
| 258 | Yambe T, Meng X, Hou X, et al. Cardio-ankle vascul       | 2005 | Hearts | DD | 7   | 0       | 0       | No  |               | No  |                | 0   |
| 259 | Yan S, Tu Z, Lu W, et al. Clinical utility of an autom   | 2009 | Livers |    | 183 | 2007/1  | 2009/1  | Yes | This study wa | No  |                | 0   |
| 260 | Yang CH, He XS, Chen J, et al. Fungal infection in p     | 2012 | Livers |    | 886 | 2003/1  | 2012/9  | No  |               | No  |                | 0   |
| 261 | Yang JW, Liao SS, Zhu LQ, et al. Population pharm        | 2015 | Livers |    | 52  | 2011    | 2012    | Yes | Approval for  | No  |                | 0   |
| 262 | Yang X, Lu Q, Tang T, et al. Prediction of the progn     | 2013 | Livers | DD | 74  | 1999/1  | 2010/12 | Yes | The study pro | Yes | None of the    | 0   |
| 263 | Yang YJ, Chen DZ, Li LX, et al. Sirolimus-Based Imn      | 2008 | Livers |    | 16  | 2004/1  | 2005/1  | No  |               | No  |                | 0   |
| 264 | Yang YL, Shi LJ, Lin MJ, et al. Clinical analysis and s  | 2013 | Livers |    | 14  | 2001/11 | 2005/10 | No  |               | No  |                | 0   |

|     | B                                                      | C    | D      | E  | F    | G       | H       | I   | J               | K   | L              | M   |
|-----|--------------------------------------------------------|------|--------|----|------|---------|---------|-----|-----------------|-----|----------------|-----|
| 265 | Yang Z, Zhou L, Wu LM, et al. Overexpression of lo     | 2011 | Livers |    | 60   | 2003    | 2005    | Yes | This study wa   | No  |                | 0   |
| 266 | Yang Z, Zhou L, Wu LM, et al. Combination of poly      | 2010 | Livers |    | 97   | 2003    | 2006    | Yes | This study pr   | No  |                | 0   |
| 267 | Yao J, Feng XW, Yu XB, et al. Recipient IL-6-572c/c    | 2013 | Livers |    | 335  | 2005/1  | 2010/12 | Yes | This study wa   | No  |                | 0   |
| 268 | Yi H, An Y, Lv H, et al. The association of lipopolysa | 2014 | Livers |    | 26   | 2004/3  | 2006/1  | Yes | The study pr    | No  |                | 0   |
| 269 | Yu S, He X, Yang L, et al. A retrospective study of c  | 2008 | Livers |    | 44   | 2004/1  | 2007/1  | No  |                 | No  |                | 0   |
| 270 | Yu S, Wu L, Jin J, et al. Influence of CYP3A5 gene p   | 2006 | Livers | DD | 53   | 2004/7  | 2005/3  | No  |                 | No  |                | 0   |
| 271 | Yu X, Wei B, Dai Y, et al. Genetic polymorphism of     | 2014 | Livers |    | 289  | 2006    | 2011    | Yes | The research    | No  |                | 0   |
| 272 | Yu X, Xie H, Wei B, et al. Association of MDR1 gen     | 2011 | Livers |    | 64   | 0       | 0       | Yes | The research    | No  |                | 0   |
| 273 | Yuan D, Wei YG, Lin HM, et al. Risk factors of bilia   | 2009 | Livers | DD | 263  | 1999/1  | 2005/11 | Yes | All the liver t | No  |                | 0   |
| 274 | Zeng Z, Jiang Z, Wang CS, et al. Preoperative evalu    | 2010 | Hearts | DD | 106  | 2004/1  | 2006/3  | No  |                 | No  |                | 0   |
| 275 | Zhai H, Liang P, Yu XL, et al. Microwave ablation in   | 2015 | Livers |    | 11   | 2008/10 | 2014/8  | No  |                 | No  |                | 0   |
| 276 | Zhang A, Zhang M, Shen Y, et al. Hepatitis B virus     | 2009 | Livers |    | 144  | 2002/1  | 2005/12 | No  |                 | No  |                | 0   |
| 277 | Zhang C, Rao J, Tu Z, et al. Surgical resection of res | 2009 | Livers |    | 5    | 2003/10 | 2007/9  | No  | The study wa    | No  |                | 0   |
| 278 | Zhang D, Jiao Z, Han J, et al. Clinicopathological fe  | 2014 | Livers |    | 184  | 1999    | 2010    | Yes | This study w    | Yes | Grafts were    | 0   |
| 279 | Zhang F, Wu LM, Zhou L, et al. Predictive value of     | 2008 | Livers |    | 65   | 2003    | 2005    | Yes | This study wa   | No  |                | 0   |
| 280 | Zhang FJ, Li CX, Liang Z, et al. Short- to mid-term e  | 2009 | Livers |    | 10   | 2004/11 | 2008/5  | Yes | All procedur    | No  |                | 0   |
| 281 | Zhang H, Chen L, Gu G, et al. Clinical observation a   | 2013 | Livers |    | 8    | 2004/5  | 2009/3  | No  |                 | No  |                | 0   |
| 282 | Zhang HM, Jiang WT, Pan C, et al. Milan criteria, U    | 2015 | Livers | DD | 1554 | 2000/1  | 2011/12 | No  |                 | No  |                | 0   |
| 283 | Zhang HM, Li SP, Yu Y, et al. Bi-directional roles of  | 2016 | Livers |    | 127  | 2011/7  | 2014/7  | Yes | The study wa    | No  |                | 0   |
| 284 | Zhang LJ, Yang GF, Jiang B, et al. Cavernous transf    | 2008 | Livers |    | 14   | 2003/1  | 2005/2  | No  |                 | No  |                | 0   |
| 285 | Zhang M, Yin F, Chen B, et al. Mortality risk after li | 2012 | Livers | DD | 290  | 1999/2  | 2009/8  | Yes | Each liver do   | Yes | All organ dor  | MX  |
| 286 | Zhang M, Zhong X, Zhang W, et al. Human parvovi        | 2015 | Livers | DD | 13   | 2011/11 | 2014/5  | Yes | We obtained     | No  | The livers fo  | DCD |
| 287 | Zhang ML, Xu J, Zhang W, et al. Microbial epidemi      | 2016 | Livers | DD | 198  | 2010/1  | 2014/12 | No  |                 | No  |                | DCD |
| 288 | Zhang P, Guo Z, Zhong K, et al. Evaluation of Immu     | 2015 | Livers |    | 68   | 0       | 0       | Yes | This study wa   | No  |                | 0   |
| 289 | Zhang Q, Chen H, Li Q, et al. Combination adjuvant     | 2011 | Livers |    | 95   | 2005/2  | 2006/12 | Yes | The protocol    | No  |                | 0   |
| 290 | Zhang Q, Chen X, Zang Y, et al. The Survival Benefi    | 2012 | Livers |    | 313  | 2002    | 2008    | Yes | This retrospe   | No  |                | 0   |
| 291 | Zhang Q, Shang L, Zang Y, et al. ?-Fetoprotein is a    | 2014 | Livers |    | 203  | 2002/7  | 2006/12 | Yes | This study w    | No  |                | 0   |
| 292 | Zhang W, Zhong H, Zhuang L, et al. Peripheral blod     | 2016 | Livers | DD | 76   | 2011/1  | 2013/12 | Yes | This study wa   | No  |                | 0   |
| 293 | Zhang X, Fan J, Yang MF, et al. Monitoring of hum      | 2009 | Livers |    | 51   | 2005/11 | 2007/9  | No  |                 | No  |                | 0   |
| 294 | Zhang X, Wang Z, Fan J, et al. Impact of interleukin   | 2011 | Livers |    | 53   | 2006/5  | 2010/3  | Yes | This study wa   | No  |                | 0   |
| 295 | Zhang X, Xu J, Fan J, et al. Influence of IL-18 and IL | 2017 | Lungs  | DD | 51   | 2005/7  | 2015/7  | Yes | The study wa    | No  |                | 0   |
| 296 | Zhang XD, Cheng Y, Poon CS, et al. Long-and short-     | 2015 | Livers |    | 13   | 2013/12 | 2014/9  | Yes | This prospect   | No  |                | 0   |
| 297 | Zhang XF, Lv Y, Xue WJ, et al. Mycobacterium tube      | 2008 | Livers |    | 85   | 2000    | 2006/4  | No  |                 | No  |                | 0   |
| 298 | Zhang XQ, Wang ZW, Fan JW, et al. The impact of        | 2012 | Livers |    | 262  | 2002/3  | 2009/7  | Yes | This study wa   | No  |                | 0   |
| 299 | Zhang Y, Wang YL, Liu YW, et al. Change of Periph      | 2009 | Livers | DD | 20   | 2003    | 2004    | Yes | The present s   | No  |                | 0   |
| 300 | Zhang Y, Yan L, Wen T, et al. Prophylaxis against h    | 2012 | Livers |    | 510  | 1999/6  | 2009/10 | Yes | These were a    | Yes | All liver graf | 0   |
| 301 | Zhang YC, Qu EZ, Ren J, et al. New diagnosis and t     | 2014 | Livers |    | 594  | 2003/10 | 2012/6  | Yes | All the patier  | No  |                | 0   |
| 302 | Zheng RQ, Mao R, Ren J, et al. Contrast-enhanced       | 2010 | Livers |    | 47   | 2005/3  | 2008/12 | Yes | Written, info   | No  |                | 0   |
| 303 | Zheng S, Chen Y, Liang T, et al. Prevention of hepat   | 2006 | Livers |    | 165  | 1999/12 | 2004/6  | No  |                 | No  |                | 0   |
| 304 | Zheng SS, Xu X, Wu J, et al. Liver transplantation fo  | 2008 | Livers |    | 195  | 2000/1  | 2007/1  | Yes | In-formed co    | No  |                | 0   |
| 305 | Zheng Z, Gao S, Yang Z, et al. Single nucleotide po    | 2014 | Livers |    | 187  | 2003    | 2012    | Yes | This study pr   | No  |                | 0   |
| 306 | Zheng Z, Lin B, Zhang J, et al. Absolute lymphocyte    | 2015 | Livers |    | 269  | 2004    | 2013    | Yes | This study wa   | No  |                | 0   |
| 307 | Zhenglu W, Hui L, Shuying Z, et al. A Clinical-Patho   | 2007 | Livers |    | 131  | 2000/6  | 2006/8  | No  |                 | No  |                | 0   |
| 308 | Zhong L, Men TY, Li H, et al. Multidrug-resistant gr   | 2012 | Livers | DD | 217  | 2007/1  | 2010/4  | Yes | This study wa   | No  |                | 0   |

|     | B                                                       | C    | D      | E       | F      | G       | H       | I   | J               | K   | L              | M         |
|-----|---------------------------------------------------------|------|--------|---------|--------|---------|---------|-----|-----------------|-----|----------------|-----------|
| 309 | Zhongyang S, Yihe L, Lixin Y, et al. An experience fr   | 2006 | Livers | DD      | 1510   | 2000/1  | 2005/6  | No  |                 | No  |                | 0         |
| 310 | Zhou B, Shan H, Zhu KS, et al. Chemoembolization        | 2010 | Livers |         | 726    | 2003/11 | 2007/10 | Yes | This retrospe   | No  |                | 0         |
| 311 | Zhou J, Fan J, Wang JH, et al. Continuous transcath     | 2005 | Livers |         | 287    | 2001/4  | 2005/4  | No  |                 | No  |                | 0         |
| 312 | Zhou J, Huang H, Liu S, et al. Staphylococcus Aureu     | 2015 | Livers |         | 20     | 2001/1  | 2014/12 | No  |                 | No  |                | 0         |
| 313 | Zhou J, Ju W, Yuan X, et al. ABO-incompatible liver     | 2015 | Livers |         | 103    | 2006/1  | 2010/12 | Yes | This study ha   | No  |                | 0         |
| 314 | Zhou J, Wang Z, Qiu SJ, et al. Surgical treatment fo    | 2010 | Livers | DD      | 1105   | 2003/1  | 2007/12 | Yes | All except tv   | No  |                | 0         |
| 315 | Zhou J, Wang Z, Wu ZQ, et al. Sirolimus-Based Imi       | 2008 | Livers |         | 73     | 2004/3  | 2005/12 | Yes | This study wa   | No  |                | 0         |
| 316 | Zhou L, Fan J, Zheng SS, et al. Prevalence of Huma      | 2006 | Livers |         | 5      | 0       | 0       | No  |                 | No  |                | 0         |
| 317 | Zhou L, Wei B, Xing C, et al. Polymorphism in 3'-ur     | 2011 | Livers |         | 125    | 2004    | 2008    | Yes | This study wa   | No  |                | 0         |
| 318 | Zhou L, Zhou W, Wu L, et al. The association of fre     | 2010 | Livers |         | 37     | 0       | 0       | Yes | This study wa   | No  |                | 0         |
| 319 | Zhou ZB, Shao XX, Yang XY, et al. Influence of Hydr     | 2015 | Livers |         | 394    | 2003/5  | 2013/12 | No  |                 | No  |                | 0         |
| 320 | Zhu L, Wang H, Rao W, et al. A limited sampling st      | 2013 | Livers |         | 26     | 0       | 0       | No  |                 | No  |                | 0         |
| 321 | Zhu M, Li Y, Xia Q, et al. Strong impact of acute kid   | 2010 | Livers | DD      | 193    | 2004/10 | 2006/1  | Yes | This study wa   | Yes | No prisoners   | 0         |
| 322 | Zhu Q, Zhou L, Yang Z, et al. O-GlcNAcylation plays     | 2012 | Livers |         | 60     | 2003    | 2005    | Yes | This study wa   | No  |                | 0         |
| 323 | Zhu X, Wu Y, Qiu Y, et al. Effects of ?-3 fish oil lipi | 2013 | Livers |         | 98     | 2006/1  | 2010/7  | Yes | The protocol    | No  |                | 0         |
| 324 | Zhu XD, Shen ZY, Chen XG, et al. Pathotyping and c      | 2013 | Livers |         | 103    | 2002/4  | 2006/3  | Yes | All protocols   | No  |                | 0         |
| 325 | Zhu XS, Gao YH, Wang SS, et al. Contrast-enhance        | 2012 | Livers | DD      | 247    | 2003/8  | 2010/12 | Yes | This retrospe   | Yes | Severe injuri  | DCD + DBD |
| 326 | Zhu XS, Wang SS, Cheng Q, et al. Using ultrasonog       | 2016 | Livers | DD      | 40     | 0       | 0       | Yes | Written infor   | Yes | Written infor  | DBD       |
| 327 | Zhu ZJ, Shen ZY, Gao W, et al. Feasibility of using     | 2010 | Livers | DD      | 14     | 2003/5  | 2009/12 | No  |                 | No  |                | DCD       |
| 328 | Zicheng Y, Weixia Z, Hao C, et al. Limited sampling     | 2007 | Livers |         | 38     | 0       | 0       | Yes | The study pro   | No  |                | 0         |
| 329 | Zou SJ, Chen D, Li YZ, et al. Monitoring Hepatocyte     | 2015 | Livers |         | 57     | 2011/1  | 2014/1  | Yes | This study wa   | No  |                | 0         |
| 330 | Zou Y, Yang X, Jiang X, et al. High levels of soluble   | 2009 | Livers | DD      | 133    | 2005    | 2007    | Yes | The Universit   | No  |                | 0         |
| 331 | Cai X, Liu F, Zhu F, et al. Cholangiographic features   | 2015 | Livers |         | 76     | 2006    | 2009    | Yes | The study pro   | No  |                | 0         |
| 332 | Chen D, Liu S, Chen S, et al. Donor interleukin 6 ger   | 2016 | Livers |         | 110    | 2006/12 | 2013/12 | Yes | Written infor   | No  |                | 0         |
| 333 | Chen H, Miao R, Fan J, et al. Decreased expression      | 2013 | Livers |         | 68     | 2002    | 2007    | Yes | All samples v   | No  |                | 0         |
| 334 | Chen J, Wang Y, Shen Z, et al. Early diagnostic valu    | 2011 | Livers | DD      | 55     | 2008    | 2009    | Yes | The present s   | Yes | No prisoners   | 0         |
| 335 | Chen J, Zhong L. Clinical significance of serum hepi    | 2013 | Livers |         | 18     | 2009/10 | 2010/1  | No  |                 | No  |                | 0         |
| 336 | Chen X, Meng X, Xu Y, et al. Cytokine and human le      | 2016 | Livers |         | 23     | 2004/1  | 2014/12 | Yes | This compar     | No  |                | 0         |
| 337 | Chen XY, Hou PF, Bi J, et al. Detection of human cy     | 2014 | Livers |         | 133    | 0       | 0       | No  |                 | No  |                | 0         |
| 338 | Cheng Y, Huang LX, Zhang L, et al. Longitudinal intr    | 2017 | Livers |         | 20     | 2013/12 | 2015/10 | Yes | This study wa   | No  |                | 0         |
| 339 | Chuan W, Li C, Wen TF, et al. Short-term and long-      | 2014 | Livers | DD + LD | 39     | 2008/5  | 2011/10 | No  |                 | No  |                | 0         |
| 340 | Dai X, Zhao HQ, Liu RH, et al. Percutaneous radiofr     | 2012 | Livers |         | 124    | 0       | 0       | Yes | This study wa   | No  |                | 0         |
| 341 | Fan J, Zhang X, Chen XM, et al. Monitoring of huma      | 2009 | Livers |         | 97     | 0       | 0       | No  |                 | No  |                | 0         |
| 342 | Fan X, Chen Z, Nasralla D, et al. The organ preserv     | 2016 | Livers | DD      | 32     | 2010/4  | 2015/5  | Yes | This study wa   | Yes | All organs th  | DBD       |
| 343 | Fang C, Yan S, Liu J, et al. Gastrointestinal perforat  | 2016 | Livers | DD      | 8      | 2008/5  | 2014/2  | No  |                 | No  |                | 0         |
| 344 | Fu SJ, Ji F, Han M, et al. Prognostic value of combi    | 2017 | Livers |         | 130    | 0       | 0       | No  |                 | No  |                | 0         |
| 345 | Gao PJ, Gao J, Li Z, et al. Liver transplantation in a  | 2016 | Livers |         | 20,524 | 1993/1  | 2013/6  | Yes | This study wa   | No  |                | 0         |
| 346 | Gao S, Yang Z, Zheng ZY, et al. Reduced expression      | 2013 | Livers |         | 61     | 2003    | 2005    | Yes | The study wa    | No  |                | 0         |
| 347 | Guo QL, Duan BW, Lu SC, et al. Liver transplantati      | 2017 | Livers | DD      | 370    | 2010/1  | 2014/12 | Yes | the protocol    | No  |                | DCD       |
| 348 | Han ZB, Chen HY, Fan JW, et al. Up-regulation of n      | 2011 | Livers |         | 100    | 2002    | 2007    | Yes | All patients    | No  |                | 0         |
| 349 | Huang J, Yan L, Wu H, et al. Is radiofrequency ablat    | 2016 | Livers | DD      | 269    | 1997/3  | 2012/12 | Yes | This study co   | No  |                | 0         |
| 350 | Huang Y, Yang X, Zhao F, et al. Overexpression of l     | 2014 | Livers |         | 148    | 2001    | 2005    | Yes | Ethicalappro    | No  |                | 0         |
| 351 | Huang ZY, Liang BY, Xiong M, et al. Severity of cirr    | 2016 | Livers |         | 51     | 2001    | 2009    | Yes | The study p     | No  |                | 0         |
| 352 | Lei JY, Yan LN, Wang WT, et al. Health-Related Qu       | 2016 | Livers | DD      | 95     | 2000/8  | 2010/7  | Yes | All of the livi | Yes | Inaddition, th | DBD       |

|     | B                                                       | C    | D      | E  | F             | G       | H       | I   | J              | K   | L              | M       |
|-----|---------------------------------------------------------|------|--------|----|---------------|---------|---------|-----|----------------|-----|----------------|---------|
| 353 | Li D, Lu T, Shen C, et al. Expression of fibroblast gr  | 2016 | Livers |    | 15            | 2014/1  | 2014/12 | Yes | Written info   | No  | Hepatic tissu  | DCD     |
| 354 | Li H, Xie HY, Zhou L, et al. Lack of association of th  | 2011 | Livers | DD | 185           | 2006/1  | 2009/3  | Yes | This study wa  | No  |                | 0       |
| 355 | Li J, Bai Y, Wang L, et al. Regulatory Effect of FK50   | 2008 | Livers |    | 22            | 2006/11 | 2007/3  | No  |                | No  |                | 0       |
| 356 | Li W, Yuan G, Liu H, et al. Comparison of HPLC-MS,      | 2015 | Livers |    | not specified | 0       | 0       | No  |                | No  |                | 0       |
| 357 | Li X, Chi X, Luo G, et al. Ulinastatin ameliorates ac   | 2015 | Livers |    | 60            | 0       | 0       | Yes | Informed cor   | No  |                | 0       |
| 358 | Lin B, Geng L, Zheng Z, et al. The predictive value     | 2016 | Livers |    | 84            | 2004/1  | 2011/12 | Yes | All LT were p  | Yes | In this study, | 0       |
| 359 | Lin XH, Teng S, Wang L, et al. Fatigue and its assoc    | 2017 | Livers | DD | 281           | 0       | 0       | Yes | Ethical appro  | Yes | The organ t    | 0       |
| 360 | Lin YH, Cai ZS, Jiang Y, et al. Perioperative risk fact | 2010 | Livers |    | 107           | 2007/4  | 2009/3  | Yes | The Clinical R | No  |                | 0       |
| 361 | Ling L, He X, Zeng J, et al. In-hospital cerebrovascu   | 2008 | Livers |    | 337           | 1996/1  | 2005/6  | Yes | The research   | No  |                | 0       |
| 362 | Ling Q, Xie H, Li J, et al. Donor Graft MicroRNAs: A    | 2017 | Livers |    | 213           | 2011/9  | 2014/12 | Yes | This study wa  | Yes | No donor live  | OT      |
| 363 | Liu C, Tsai HL, Chin T, et al. Experience of surgical t | 2016 | Livers | DD | 213           | 2011/9  | 2014/12 | Yes | This study wa  | Yes | No donor live  | DCD     |
| 364 | Liu S, Bai Y, Huang J, et al. Do mitochondria contri    | 2013 | Hearts | DD | 6             | 0       | 0       | Yes | All participar | Yes | Normal cont    | 0       |
| 365 | Liu X, Wang B, Zhang X, et al. Liver Transplantatio     | 2016 | Livers | DD | 102           | 2010/3  | 2014/12 | Yes | . The study p  | Yes | All the DBCD   | DBCD    |
| 366 | Liu Y, Liu YY, Li CP, et al. Comprehensive comparis     | 2015 | Livers |    | 1163          | 2008/1  | 2012/12 | Yes | This study wa  | Yes | None of the    | 0       |
| 367 | Lu HW, Dong JH, Li CH, et al. The defects of chol       | 2014 | Livers | DD | 4             | 2008/1  | 2010/12 | Yes | The study wa   | No  | The donor liv  | DCD     |
| 368 | Lu SC, Jiang T, Lai W, et al. Reestablishment of act    | 2014 | Livers |    | 200           | 1999    | 2010    | Yes | This study wa  | No  |                | 0       |
| 369 | Luo XJ, Wang W, Hu SS, et al. Extracorporeal mem        | 2009 | Hearts | DD | 45            | 2005/2  | 2008/6  | No  |                | No  |                | 0       |
| 370 | Meng X, Chen X, Wu L, et al. The Hyperlipidemia C       | 2017 | Livers |    | 38            | 0       | 0       | Yes | The study wa   | No  |                | 0       |
| 371 | Niu Y, Chen X, Feng L, et al. Anti-HBc-positive/HBs     | 2014 | Livers |    | 19            | 2012/1  | 2012/5  | Yes | The Medical    | No  |                | 0       |
| 372 | Peng C, Zhang Z, Wu J, et al. A critical role for ZDH   | 2014 | Livers |    | 40            | 2006    | 2009    | Yes | This study wa  | No  |                | 0       |
| 373 | Qiao B, Wu J, Wan Q, et al. Factors influencing mc      | 2017 | Livers | DD | 44            | 2003/1  | 2016/2  | Yes | The study pro  | No  |                | DCD/DBD |
| 374 | Qu W, Zhu ZJ, Sun LY, et al. Correlation Between I      | 2016 | Livers |    | 172           | 2010/7  | 2012/10 | Yes | The study wa   | No  |                | 0       |
| 375 | Qu W, Zhu ZJ, Sun LY, et al. Correlation Between S      | 2017 | Livers |    | 273           | 1998/12 | 2011/12 | Yes | The study wa   | No  |                | 0       |
| 376 | Ren L, Teng M, Zhang T, et al. Donors FMO3 polym        | 2017 | Livers |    | 110           | 2007/7  | 2012/3  | Yes | This research  | No  |                | 0       |
| 377 | Ren QQ, Fu SJ, Zhao Q, et al. Prognostic value of p     | 2016 | Livers | DD | 101           | 2009/1  | 2013/5  | No  |                | No  |                | 0       |
| 378 | Ren X, Guan J, Gao N, et al. Evaluation of pediatric    | 2016 | Livers | DD | 10            | 2007/5  | 2015/8  | Yes | All the surge  | No  |                | DBD     |
| 379 | Ren X, Luo Y, Gao N, et al. Common ultrasound an        | 2016 | Livers |    | 2085          | 2005/1  | 2015/11 | Yes | The present s  | No  |                | 0       |
| 380 | Shan Y, Shen N, Han L, et al. MicroRNA-499 Rs374        | 2016 | Livers | DD | 36            | 2006/1  | 2014/7  | Yes | The protocol   | No  |                | DCD     |
| 381 | Shen C, Peng C, Shen B, et al. Sirolimus and metfo      | 2016 | Livers |    | 133           | 2001/1  | 2013/12 | No  |                | No  |                | 0       |
| 382 | Shen Z, Zhu Z, Zhang Y, et al. Liver transplantation    | 2005 | Livers |    | 1803          | 1998/8  | 2005/9  | No  |                | No  |                | 0       |
| 383 | Shen ZY, Zheng WP, Deng YL, et al. Variations in th     | 2012 | Livers |    | 34            | 2002/6  | 2003/12 | Yes | The study wa   | No  |                | 0       |
| 384 | Shi F, Zhang JY, Zeng Z, et al. Skewed ratios betwe     | 2010 | Livers |    | 10            | 0       | 0       | No  |                | No  |                | 0       |
| 385 | Shi SH, Kong HS, Jia CK, et al. Risk factors for pneu   | 2010 | Livers |    | 475           | 2002/1  | 2006/12 | No  |                | No  |                | 0       |
| 386 | Su H, Ye Q, Wan Q, et al. Predictors of mortality in    | 2016 | Livers |    | 310           | 2003/1  | 2015/6  | Yes | The Third Xia  | No  |                | 0       |
| 387 | Wang L, Zang Y, Lu S, et al. Efficacy of sirolimus or   | 2017 | Livers |    | 52            | 2004/5  | 2016/4  | No  |                | No  |                | 0       |
| 388 | Wang LJ, Liu ZR, Zhang YM, et al. Clinical analysis     | 2016 | Livers | DD | 15            | 2001    | 2014    | No  |                | No  |                | 0       |
| 389 | Wang P, Li H, Shi B, et al. Prognostic factors in pat   | 2016 | Livers |    | 74            | 2001/10 | 2013/2  | Yes | This study wa  | No  |                | 0       |
| 390 | Wang PL, Wang J, Zhou Y, et al. Expression of prog      | 2017 | Livers |    | 15            | 2014/7  | 2015/7  | Yes | Ethical appro  | No  |                | 0       |
| 391 | Wang Y, Shen Z, Zhu Z, et al. Clinical values of AFP    | 2011 | Livers |    | 29            | 2008/1  | 2008/12 | Yes | The present s  | Yes | All recipients | 0       |
| 392 | Wang Z, Gong W, Shou D, et al. Clonal origin of he      | 2016 | Livers |    | 60            | 2007/8  | 2012/12 | Yes | The study wa   | No  |                | 0       |
| 393 | Wei YJ, Huang YX, Zhang XL, et al. Apolipoprotein I     | 2008 | Hearts | DD | 6             | 0       | 0       | Yes | All patients a | No  |                | 0       |
| 394 | Wu D, Shen ZY, Zhang YM, et al. Effect of liver traf    | 2015 | Livers | DD | 21            | 2000/4  | 2011/4  | Yes | This studywa   | No  |                | 0       |
| 395 | Xia W, Ke Q, Guo H, et al. Expansion of the Milan c     | 2017 | Livers |    | 343           | 2003/1  | 2013/12 | Yes | Ethical appro  | No  |                | 0       |
| 396 | Xiao H, Tong R, Cheng S, et al. BAG3 and HIF-1 alp      | 2014 | Livers |    | 40            | 2005    | 2010    | Yes | Letters of co  | No  |                | 0       |

|     | B                                                       | C    | D      | E  | F    | G       | H       | I   | J              | K   | L              | M         |
|-----|---------------------------------------------------------|------|--------|----|------|---------|---------|-----|----------------|-----|----------------|-----------|
| 397 | Xing T, Zhong L, Qiu G, et al. Evolution of CD4<sup>    | 2014 | Livers |    | 75   | 2010/3  | 2011/3  | No  |                | No  |                | 0         |
| 398 | Xu SL, Zhang YC, Wang GY, et al. Survival analysis      | 2016 | Livers |    | 142  | 2006/1  | 2012/1  | Yes | The study pro  | No  |                | 0         |
| 399 | Xu X, Ling Q, Wang J, et al. Donor miR-196a-2 poly      | 2016 | Livers |    | 155  | 2007/1  | 2011/3  | Yes | Each organ d   | Yes | No donor org   | 0         |
| 400 | Xue M, Lv C, Chen X, et al. Effect of interleukin-2 re  | 2015 | Livers |    | 757  | 2001/4  | 2014/12 | Yes | All study par  | No  |                | 0         |
| 401 | Yan L, Li B, Wen T, et al. Prophylaxis Against hepat    | 2010 | Livers | DD | 184  | 2002/5  | 2009/12 | Yes | Living and de  | Yes | Living and de  | DBD       |
| 402 | Yang J, Zhu L, Zhang Y, et al. PPK analysis of tacrol   | 2017 | Livers |    | 46   | 2011    | 2013    | Yes | Approval was   | No  |                | 0         |
| 403 | Yu D, Liu J, Chen J, et al. GGPPS1 predicts the biolc   | 2014 | Livers |    | 10   | 2005/1  | 2012/8  | Yes | This study wa  | No  |                | 0         |
| 404 | Yu S, Gao F, Yu J, et al. De novo cancers following     | 2014 | Livers |    | 17   | 2005/1  | 2011/12 | Yes | Ethical appro  | No  |                | 0         |
| 405 | Yu X, Liu Z, Wang Y, et al. Characteristics of Vdelta   | 2013 | Livers | DD | 63   | 0       | 0       | Yes | The study pro  | No  |                | 0         |
| 406 | Yu Z, Sun Z, Yu S, et al. Safety limitations of fatty l | 2016 | Livers | DD | 563  | 2010/4  | 2014/10 | Yes | Written infor  | Yes | no allografts  | DCD       |
| 407 | Yuan X, Chen C, Zhou J, et al. Organ Donation and       | 2016 | Livers | DD | 30   | 2013/1  | 2014/12 | No  |                | Yes | All donors w   | DBD + DCD |
| 408 | Zhang G, Cheng Y, Shen W, et al. The short-term e       | 2016 | Livers |    | 30   | 0       | 0       | Yes | This study wa  | No  |                | 0         |
| 409 | Zhang H, Shi Y, Wu H, et al. Change of hepatic arte     | 2016 | Livers | DD | 128  | 2013/9  | 2014/8  | No  |                | No  |                | DCD       |
| 410 | Zhang M, Yin F, Chen B, et al. Pretransplant predic     | 2012 | Livers | DD | 360  | 1999/2  | 2009/8  | Yes | Each liver do  | Yes | All organ dor  | DBD + DCD |
| 411 | Zhang XX, Bian RJ, Wang J, et al. Relationship betw     | 2016 | Livers |    | 359  | 2013    | 2015    | Yes | All participar | No  |                | 0         |
| 412 | Zhang YC, Liu W, Fu BS, et al. Therapeutic potentia     | 2017 | Livers |    | 12   | 2013/1  | 2014/6  | Yes | The study pro  | No  |                | 0         |
| 413 | Zhong L, Li H, Li Z, et al. C7 genotype of the donor    | 2016 | Livers |    | 190  | 2007/7  | 2011/1  | Yes | Written infor  | Yes | None of the    | 0         |
| 414 | Zhong X, Zhang W, Xu J, et al. Human parvovirus B       | 2015 | Livers | DD | 13   | 2011/11 | 2014/5  | Yes | We obtained    | No  |                | DCD       |
| 415 | Zhong ZQ, Luo AJ, Wan QQ, et al. Pseudomonas A          | 2016 | Livers | DD | 15   | 2003/1  | 2015/6  | No  |                | No  |                | 0         |
| 416 | Zhou Q, Wang Y, Zhou X, et al. Prognostic analysis      | 2011 | Livers | DD | 12   | 2003/1  | 2010/6  | No  |                | No  |                | DCD       |
| 417 | Zhu B, Chen Y, Xie Y, et al. Kaposi's sarcoma-assoc     | 2008 | Livers |    | 33   | 0       | 0       | No  |                | No  |                | 0         |
| 418 | Zhu L, Yang J, Jing Y, et al. Effects of CYP3A5 genot   | 2015 | Livers |    | 95   | 2013    | 2014    | Yes | Approval was   | No  |                | 0         |
| 419 | Aidong W, Zhenjie C, Tong L, et al. Therapeutic dru     | 2004 | Hearts | DD | 23   | 2000    | 2003    | No  |                | No  |                | 0         |
| 420 | Chen Z, Gong R, Luo Y, et al. Surgical procedures fo    | 2010 | Livers |    | 15   | 2000/1  | 2006/12 | Yes | The ethical a  | Yes | All donors in  | 0         |
| 421 | Chen ZS, Zeng FJ, Ming CS, et al. The survival and      | 2004 | Livers |    | 50   | 1999/1  | 2002/2  | No  |                | No  |                | 0         |
| 422 | Cheng J, Xie HY, Xu X, et al. NDRG1 as a biomarker      | 2011 | Livers |    | 143  | 0       | 0       | Yes | This study wa  | No  |                | 0         |
| 423 | Gurbanov E, Meng X, Cui Y, et al. Evaluation ECMO       | 2011 | Hearts | DD | 22   | 2005/2  | 2009/9  | Yes | Informed cor   | No  |                | 0         |
| 424 | Hao C, Anwei M, Bing C, et al. Monitoring mycoph        | 2008 | Livers |    | 63   | 0       | 0       | Yes | The study de   | No  |                | 0         |
| 425 | Hao C, Erzhen C, Anwei M, et al. Validation of lim      | 2007 | Livers |    | 30   | 0       | 0       | Yes | The study wa   | No  |                | 0         |
| 426 | Jiang L, Lei JY, Wang WT, et al. Immediate radical      | 2014 | Livers | DD | 13   | 2003/8  | 2008/10 | Yes | LT includes li | Yes | All of the dec | DBD       |
| 427 | Lei J, Wang W, Yan L. Downstaging advanced hepa         | 2013 | Livers | DD | 132  | 2001/7  | 2013/1  | No  |                | No  |                | 0         |
| 428 | Li H, Yang S, Chen H, et al. Survival after heart tran  | 2016 | Hearts | DD | 6    | 2008    | 2011    | Yes | This study pr  | No  |                | 0         |
| 429 | Li N, Zhou J, Weng D, et al. Adjuvant adenovirus-m      | 2007 | Livers |    | 45   | 2000/9  | 2006/10 | Yes | The study wa   | No  |                | 0         |
| 430 | Liu Y, Sun LY, Zhu ZJ, et al. Measles Virus Infection   | 2015 | Livers | DD | 3    | 2014/3  | 2014/4  | No  |                | No  |                | 0         |
| 431 | Liu Z, Yu X, Ren W, et al. CD152 and PD-1 down-reg      | 2014 | Livers |    | 63   | 0       | 0       | Yes | The study pro  | No  |                | 0         |
| 432 | Shi R, Shen ZY, Teng da H, et al. Gallstones in liver   | 2015 | Livers |    | 1640 | 1994/5  | 2011/7  | Yes | This study wa  | No  |                | 0         |
| 433 | Teng da H, Zhu ZJ, Zheng H, et al. Effect of steatos    | 2012 | Livers | DD | 131  | 2007/1  | 2008/12 | Yes | Signed infor   | No  |                | DCD       |
| 434 | Teng F, Han QC, Ding GS, et al. Validation of a crit    | 2015 | Livers | DD | 1309 | 1980/1  | 2008/6  | Yes | The study pro  | No  |                | 0         |
| 435 | Wang C, Wang G, Yi H, et al. Symptom experience         | 2013 | Livers |    | 94   | 0       | 0       | Yes | This study wa  | No  |                | 0         |
| 436 | Wang GY, Li H, Liu W, et al. Elevated blood eosino      | 2013 | Livers |    | 37   | 0       | 0       | No  |                | No  |                | 0         |
| 437 | Wang ZX, Fu ZR, Ding GS, et al. Prevention of hepa      | 2004 | Livers |    | 68   | 2002/1  | 2003/7  | No  |                | No  |                | 0         |
| 438 | Wei-lin W, Jing J, Shu-sen Z, et al. Tacrolimus dose    | 2006 | Livers | DD | 50   | 2004/7  | 2005/3  | Yes | This study wa  | No  |                | 0         |
| 439 | Xing T, Zhong L, Chen D, et al. Experience of combi     | 2013 | Livers | DD | 133  | 2001/1  | 2009/12 | Yes | The study, ap  | No  |                | 0         |
| 440 | Xing T, Zhong L, Lin L, et al. Immunity of fungal inf   | 2015 | Livers | DD | 168  | 2010/1  | 2012/6  | Yes | Â This study   | No  |                | 0         |

|     | B                                                      | C    | D      | E  | F   | G      | H       | I   | J            | K   | L            | M   |
|-----|--------------------------------------------------------|------|--------|----|-----|--------|---------|-----|--------------|-----|--------------|-----|
| 441 | Ye D, Li H, Wang Y, et al. Circulating Fibroblast Grd  | 2016 | Livers |    | 13  | 0      | 0       | Yes | Written cons | No  |              | 0   |
| 442 | Yu S, Yu J, Zhang W, et al. Safe use of liver grafts f | 2014 | Livers | DD | 369 | 2010/1 | 2013/2  | Yes | Ethical appr | Yes | We declared  | DCD |
| 443 | Yuefeng M, Weili F, Wenxiang T, et al. Long-term       | 2011 | Livers |    | 17  | 2001/7 | 2005/5  | No  |              | Yes | Beforethe op | 0   |
| 444 | Zhang Q, Chen X, Zhou J, et al. CD147, MMP-2, MM       | 2006 | Livers |    | 82  | 2002/1 | 2003/12 | No  |              | No  |              | 0   |
| 445 | Gu Z, Chen B, Song Y, et al. Pharmacokinetics of fr    | 2002 | Livers |    | 50  | 0      | 0       | Yes | Informed cor | No  |              | 0   |
| 446 | Guo CB, Li YC, Zhang MM, et al. Early Postoperativ     | 2002 | Livers | DD | 1   | 2006/1 | 2009/1  | Yes | We retrospe  | Yes | No grafts we | 0   |

For peer review only



**Supplementary File 5: Bibliographic details of 63 studies containing some information regarding identity of and/or consent by donors**

1. Chen J, Wang Y, Shen Z, et al. Early diagnostic value of plasma PCT and BG assay for CRBSI after OLT. *Transplant Proc* 2011;43(5):1777-79 Online First.
2. Chen Y, Zhang H, Xiao X, et al. Peripheral blood transcriptome sequencing reveals rejection-relevant genes in long-term heart transplantation. *Int J Cardiol* 2013;168(3):2726-33 doi: 10.1016/j.ijcard.2013.03.095 published Online First.
3. Chen YB, Li SD, Ju BL, et al. Suitable calcineurin inhibitor concentrations for liver transplant recipients in the Chinese population. *Transplant Proc* 2011;43(5):1751-53 doi: 10.1016/j.transproceed.2010.11.025 published Online First.
4. Chen Z, Gong R, Luo Y, et al. Surgical procedures for hepatolithiasis. *Hepatogastroenterology* 2010;57(97):134-7 Online First.
5. Chen ZY, Yan LN, Zeng Y, et al. Preliminary Experience With Indications for Liver Transplantation for Hepatolithiasis. *Transplant Proc* 2008;40(10):3517-22 doi: 10.1016/j.transproceed.2008.07.142 published Online First.
6. Chu Z, Zhang J, Zhao Y, et al. Influence of immunosuppressive drugs on the development of CD4 +CD25high Foxp3+ T cells in liver transplant recipients. *Transplant Proc* 2010;42(7):2599-601 doi: 10.1016/j.transproceed.2010.04.026 published Online First.
7. Fan J, Yang GS, Fu ZR, et al. Liver transplantation outcomes in 1,078 hepatocellular carcinoma patients: A multi-center experience in Shanghai, China. *J Cancer Res Clin Oncol* 2009;135(10):1403-12 doi: 10.1007/s00432-009-0584-6 published Online First.
8. Fan X, Chen Z, Nasralla D, et al. The organ preservation and enhancement of donation success ratio effect of extracorporeal membrane oxygenation in circulatory unstable brain death donor. *Clin Transplant* 2016;30(10):1306-13 Online First.
9. Gao Y, Ren H, Meng F, et al. Pathological roles of interleukin-22 in the development of recurrent hepatitis C after liver transplantation. *PLoS One* 2016;11(4) doi: 10.1371/journal.pone.0154419 published Online First.
10. Gao Y, Zhang M, Li J, et al. Circulating FoxP3+ regulatory T and interleukin17-producing Th17 cells actively influence HBV clearance in De Novo Hepatitis B virus infected patients after orthotopic liver transplantation. *PLoS One* 2015;10(9) doi: 10.1371/journal.pone.0137881 published Online First.
11. Gao YJ, Zhang M, Jin B, et al. A clinical-pathological analysis of hepatitis B virus recurrence after liver transplantation in Chinese patients. *Journal of Gastroenterology and Hepatology (Australia)* 2014;29(3):554-60 doi: 10.1111/jgh.12404 published Online First.

12. Gu L, Yu YC. Clinical outcome of dental implants placed in liver transplant recipients after 3 years: A case series. *Transplant Proc* 2011;43(7):2678-82 doi: 10.1016/j.transproceed.2011.06.037published Online First.
13. Gu Y, Li J, Li N. Insulin sensitivity after pancreaticoduodenal transplantation with systemic and portal venous drainage in inbred rats. *Chin Med J* 2002;115(4):549-51 Online First.
14. Hu XX, Yan LN. Retrospective analysis of prognostic factors after liver transplantation for intrahepatic cholangiocarcinoma in China: A single-center experience. *Hepatogastroenterology* 2011;58(109):1255-59 doi: 10.5754/hge10704published Online First.
15. Jiang L, Lei JY, Wang WT, et al. Immediate radical therapy or conservative treatments when meeting the Milan criteria for advanced HCC patients after successful TACE. *J Gastrointest Surg* 2014;18(6):1125-30 Online First.
16. Lei J, Yan L. Outcome Comparisons Among the Hangzhou, Chengdu, and UCSF Criteria for Hepatocellular Carcinoma Liver Transplantation after Successful Downstaging Therapies. *J Gastrointest Surg* 2013;17(6):1116-22 doi: 10.1007/s11605-013-2140-6published Online First.
17. Lei JY, Wang WT, Yan LN. Hangzhou criteria for liver transplantation in hepatocellular carcinoma: A single-center experience. *Eur J Gastroenterol Hepatol* 2014;26(2):200-04 doi: 10.1097/MEG.0b013e3283652b66published Online First.
18. Lei JY, Yan LN, Wang WT, et al. Health-Related Quality of Life and Psychological Distress in Patients With Early-Stage Hepatocellular Carcinoma After Hepatic Resection or Transplantation. *Transplant Proc* 2016;48(6):2107-11 Online First.
19. Li F, Yang M, Li B, et al. Initial clinical results of orthotopic liver transplantation for hepatic alveolar echinococcosis. *Liver Transpl* 2007;13(6):924-26 doi: 10.1002/lt.21187published Online First.
20. Li H, He JW, Fu BS, et al. Immunosuppressant-related hip pain after orthotopic liver transplant. *Exp Clin Transplant* 2013;11(1):32-38 doi: 10.6002/ect.2012.0026published Online First.
21. Li H, Li J, Wang Y, et al. Proteomic analysis of effluents from perfused human heart for transplantation: Identification of potential biomarkers for ischemic heart damage. *Proteome Science* 2012;10(1) doi: 10.1186/1477-5956-10-21published Online First.
22. Li J, Liu B, Yan LN, et al. Reversal of Graft Steatosis After Liver Transplantation: Prospective Study. *Transplant Proc* 2009;41(9):3560-63 doi: 10.1016/j.transproceed.2009.06.222published Online First.

- 1  
2  
3 23. Li WX, Li Z, Gao PJ, et al. Histological differentiation predicts post-liver transplantation  
4 survival time. *Clinics and Research in Hepatology and Gastroenterology* 2014;38(2):201-08 doi:  
5 10.1016/j.clinre.2013.11.002published Online First.  
6  
7  
8 24. Lin B, Geng L, Zheng Z, et al. The predictive value of blood neutrophil-lymphocyte ratio  
9 in patients with end-stage liver cirrhosis following ABO-incompatible liver transplantation. *J Res*  
10 *Med Sci* 2016;21(5):20-25 Online First.  
11  
12 25. Lin XH, Teng S, Wang L, et al. Fatigue and its associated factors in liver transplant  
13 recipients in Beijing: A cross-sectional study. *BMJ Open* 2017;7 (2) (no pagination)(A113)  
14 Online First.  
15  
16  
17 26. Ling Q, Xie H, Li J, et al. Donor Graft MicroRNAs: A Newly Identified Player in the  
18 Development of New-onset Diabetes After Liver Transplantation. *Am J Transplant*  
19 2017;17(1):255-64 Online First.  
20  
21  
22 27. Ling Q, Xie H, Lu D, et al. Association between donor and recipient TCF7L2 gene  
23 polymorphisms and the risk of new-onset diabetes mellitus after liver transplantation in a Han  
24 Chinese population. *J Hepatol* 2013;58(2):271-77 doi: 10.1016/j.jhep.2012.09.025published  
25 Online First.  
26  
27  
28 28. Ling Q, Xu X, Wang K, et al. Donor PPAR $\gamma$  Gene Polymorphisms Influence the  
29 Susceptibility to Glucose and Lipid Disorders in Liver Transplant Recipients. *Medicine (United*  
30 *States)* 2015;94(35):e1421 doi: 10.1097/MD.0000000000001421published Online First.  
31  
32 29. Liu C, Tsai HL, Chin T, et al. Experience of surgical treatment for hepatoblastoma.  
33 *Formosan Journal of Surgery* 2016;49(2):56-62 Online First.  
34  
35  
36 30. Liu S, Bai Y, Huang J, et al. Do mitochondria contribute to left ventricular non-  
37 compaction cardiomyopathy? New findings from myocardium of patients with left ventricular  
38 non-compaction cardiomyopathy. *Mol Genet Metab* 2013;109(1):100-06 Online First.  
39  
40 31. Liu X, Wang B, Zhang X, et al. Liver Transplantation Using Donation After Brain and  
41 Cardiac Death: A Single-Center Experience in China. *Transplant Proc* 2016;48(6):1879-86  
42 Online First.  
43  
44  
45 32. Liu Y, Liu YY, Li CP, et al. Comprehensive comparison of three different  
46 immunosuppressive regimens for liver transplant patients with hepatocellular carcinoma:  
47 Steroid-free immunosuppression, induction immunosuppression and standard  
48 immunosuppression. *PLoS One* 2015;10 (3) (no pagination)(e0120939) Online First.  
49  
50  
51 33. Lu D, Xu X, Wang J, et al. The influence of a contemporaneous portal and hepatic artery  
52 revascularization protocol on biliary complications after liver transplantation. *Surgery (United*  
53 *States)* 2014;155(1):190-95 doi: 10.1016/j.surg.2013.06.056published Online First.  
54  
55  
56  
57  
58  
59

- 1  
2  
3 34. Mu HJ, Xie P, Chen JY, et al. Association of TNF- $\alpha$ , TGF- $\beta$ 1, IL-10, IL-6, and IFN- $\gamma$   
4 gene polymorphism with acute rejection and infection in lung transplant recipients. *Clin*  
5 *Transplant* 2014;28(9):1016-24 doi: 10.1111/ctr.12411published Online First.  
6  
7  
8 35. Pan C, Shi Y, Zhang JJ, et al. Single-Center Experience of 253 Portal Vein Thrombosis  
9 Patients Undergoing Liver Transplantation in China. *Transplant Proc* 2009;41(9):3761-65 doi:  
10.1016/j.transproceed.2009.06.215published Online First.  
11  
12 36. Ran JH, Zhang SN, Liu J, et al. In-hospital and follow-up outcomes of patients  
13 undergoing orthotopic liver transplantation after hepatic artery reconstruction with an iliac  
14 interposition graft. *Int J Clin Exp Med* 2016;9(2):3939-45 Online First.  
15  
16  
17 37. Sun XY, Dong JH, Qin K, et al. Single center study on transplantation of livers donated  
18 after cardiac death: A report of 6 cases. *Exp Ther Med* 2016;11(3):988-92 doi:  
19 10.3892/etm.2016.3001published Online First.  
20  
21 38. Wang SY, Tang HM, Chen GQ, et al. Effect of ursodeoxycholic acid administration after  
22 liver transplantation on serum liver tests and biliary complications: A randomized clinical trial.  
23 *Digestion* 2012;86(3):208-17 doi: 10.1159/000339711published Online First.  
24  
25  
26 39. Wang Y, Liu Y, Han R, et al. Monitoring of CD95 and CD38 expression in peripheral  
27 blood T lymphocytes during active human cytomegalovirus infection after orthotopic liver  
28 transplantation. *Journal of Gastroenterology and Hepatology (Australia)* 2010;25(1):138-42 doi:  
29 10.1111/j.1440-1746.2009.05966.xpublished Online First.  
30  
31  
32 40. Wang Y, Shen Z, Zhu Z, et al. Clinical values of AFP, GPC3 mRNA in peripheral blood  
33 for prediction of hepatocellular carcinoma recurrence following OLT. *Hepatitis Monthly*  
34 2011;11(3):195-99 Online First.  
35  
36  
37 41. Xiao L, Fu ZR, Ding GS, et al. Prediction of survival after liver transplantation for  
38 chronic severe hepatitis b based on preoperative prognostic scores: A single center's experience  
39 in China. *World J Surg* 2009;33(11):2420-26 doi: 10.1007/s00268-009-0183-3published Online  
40 First.  
41  
42  
43 42. Xu J, Shen ZY, Chen XG, et al. A randomized controlled trial of licartin for preventing  
44 hepatoma recurrence after liver transplantation. *Hepatology* 2007;45(2):269-76 doi:  
45 10.1002/hep.21465published Online First.  
46  
47  
48 43. Xu X, Guo HJ, Xie HY, et al. ZIP4, a novel determinant of tumor invasion in  
49 hepatocellular carcinoma, contributes to tumor recurrence after liver transplantation. *Int J Biol*  
50 *Sci* 2014;10(3):245-56 doi: 10.7150/ijbs.7401published Online First.  
51  
52  
53 44. Xu X, Ling Q, Gao F, et al. Hepatoprotective effects of marine and kuhuang in liver  
54 transplant recipients. *Am J Chin Med* 2009;37(1):27-34 Online First.  
55  
56  
57  
58  
59

- 1  
2  
3 45. Xu X, Ling Q, Wang J, et al. Donor miR-196a-2 polymorphism is associated with  
4 hepatocellular carcinoma recurrence after liver transplantation in a Han Chinese population. *Int J*  
5 *Cancer* 2016;138(3):620-29 Online First.  
6  
7  
8 46. Xu X, Ling Q, Zhang M, et al. Outcome of patients with hepatorenal syndrome type 1  
9 after liver transplantation: Hangzhou experience. *Transplantation* 2009;87(10):1514-19 doi:  
10.1097/TP.0b013e3181a4430b published Online First.  
11  
12 47. Xu X, Liu X, Ling Q, et al. Artificial Liver Support System Combined with Liver  
13 Transplantation in the Treatment of Patients with Acute-on-Chronic Liver Failure. *PLoS One*  
14 2013;8(3) doi: 10.1371/journal.pone.0058738 published Online First.  
15  
16 48. Xu X, Tu Z, Wang B, et al. A novel model for evaluating the risk of hepatitis B  
17 recurrence after liver transplantation. *Liver International* 2011;31(10):1477-84 doi:  
18 10.1111/j.1478-3231.2011.02500.x published Online First.  
19  
20 49. Xue F, Higgs BW, Huang J, et al. HERC5 is a prognostic biomarker for post-liver  
21 transplant recurrent human hepatocellular carcinoma. *J Transl Med* 2015;13(1) doi:  
22 10.1186/s12967-015-0743-2 published Online First.  
23  
24 50. Yan L, Li B, Wen T, et al. Prophylaxis Against hepatitis B recurrence posttransplantation  
25 using lamivudine and individualized low-dose hepatitis B immunoglobulin. *Am J Transplant*  
26 2010;10(8):1861-69 Online First.  
27  
28 51. Yang X, Lu Q, Tang T, et al. Prediction of the prognosis after liver transplantation in  
29 severe hepatitis B-induced liver failure and clinical decision for liver transplantation. *J Surg Res*  
30 2013;183(2):846-51 doi: 10.1016/j.jss.2013.01.034 published Online First.  
31  
32 52. Yu S, Yu J, Zhang W, et al. Safe use of liver grafts from hepatitis B surface antigen  
33 positive donors in liver transplantation. *J Hepatol* 2014;61(4):809-15 Online First.  
34  
35 53. Yu Z, Sun Z, Yu S, et al. Safety limitations of fatty liver transplantation can be extended  
36 to 40%: Experience of a single centre in China. *Liver International* 2016 Online First.  
37  
38 54. Yuan X, Chen C, Zhou J, et al. Organ Donation and Transplantation From Donors With  
39 Systemic Infection: A Single-Center Experience. *Transplant Proc* 2016;48(7):2454-57 Online  
40 First.  
41  
42 55. Yuefeng M, Weili F, Wenxiang T, et al. Long-term outcome of patients with lamivudine  
43 after early cessation of hepatitis B immunoglobulin for prevention of recurrent hepatitis B  
44 following liver transplantation. *Clin Transplant* 2011;25(4):517-22 Online First.  
45  
46 56. Zhang D, Jiao Z, Han J, et al. Clinicopathological features of hepatitis B virus recurrence  
47 after liver transplantation: Eleven-year experience. *Int J Clin Exp Pathol* 2014;7(7):4057-66  
48 Online First.  
49  
50  
51  
52  
53  
54  
55  
56  
57  
58  
59  
60

- 1  
2  
3 57. Zhang M, Yin F, Chen B, et al. Mortality risk after liver transplantation in hepatocellular  
4 carcinoma recipients: A nonlinear predictive model. *Surgery (United States)* 2012;151(6):889-97  
5 doi: 10.1016/j.surg.2011.12.034published Online First.  
6  
7  
8 58. Zhang M, Yin F, Chen B, et al. Pretransplant prediction of posttransplant survival for  
9 liver recipients with benign end-stage liver diseases: A nonlinear model. *PLoS One* 2012;7 (3)  
10 (no pagination)(e31256) Online First.  
11  
12 59. Zhang Y, Yan L, Wen T, et al. Prophylaxis against hepatitis B virus recurrence after liver  
13 transplantation for hepatitis B virus-related end-stage liver diseases with severe hypersplenism  
14 and splenomegaly: Role of splenectomy. *J Surg Res* 2012;178(1):478-86 doi:  
15 10.1016/j.jss.2012.02.047published Online First.  
16  
17  
18 60. Zhong L, Li H, Li Z, et al. C7 genotype of the donor may predict early bacterial infection  
19 after liver transplantation. *Sci Rep* 2016;6:24121 Online First.  
20  
21  
22 61. Zhu M, Li Y, Xia Q, et al. Strong impact of acute kidney injury on survival after liver  
23 transplantation. *Transplant Proc* 2010;42(9):3634-38 doi:  
24 10.1016/j.transproceed.2010.08.059published Online First.  
25  
26  
27 62. Zhu XS, Gao YH, Wang SS, et al. Contrast-enhanced ultrasound diagnosis of splenic  
28 artery steal syndrome after orthotopic liver transplantation. *Liver Transpl* 2012;18(8):966-71 doi:  
29 10.1002/lt.23453published Online First.  
30  
31 63. Zhu XS, Wang SS, Cheng Q, et al. Using ultrasonography to monitor liver blood flow for  
32 liver transplant from donors supported on extracorporeal membrane oxygenation. *Liver Transpl*  
33 2016;22(2):188-91 doi: 10.1002/lt.24318published Online First.  
34  
35  
36  
37  
38  
39  
40  
41  
42  
43  
44  
45  
46  
47  
48  
49  
50  
51  
52  
53  
54  
55  
56  
57  
58  
59  
60

**Supplementary File 6: Full list of journals in which the included papers were published**

| Journal                                                     | Number |
|-------------------------------------------------------------|--------|
| Transplantation Proceedings                                 | 65     |
| PLoS ONE                                                    | 20     |
| Clinical Transplantation                                    | 16     |
| Liver Transplantation                                       | 15     |
| Hepato-Gastroenterology                                     | 14     |
| Experimental and Clinical Transplantation                   | 11     |
| Clinics and Research in Hepatology and Gastroenterology     | 8      |
| International Journal of Clinical and Experimental Medicine | 8      |
| Annals of Transplantation                                   | 7      |
| International Journal of Clinical Practice                  | 6      |
| Journal of Cancer Research and Clinical Oncology            | 6      |
| Transplantation                                             | 6      |
| European Journal of Gastroenterology and Hepatology         | 5      |
| Experimental and Therapeutic Medicine                       | 5      |
| Medical Oncology                                            | 5      |
| Medicine (United States)                                    | 5      |
| Surgery (United States)                                     | 5      |

|                                                        |   |
|--------------------------------------------------------|---|
| BMC Cancer                                             | 4 |
| European Journal of Clinical Pharmacology              | 4 |
| Genetics and Molecular Research                        | 4 |
| Hepatology International                               | 4 |
| Journal of Gastrointestinal Surgery                    | 4 |
| Journal of International Medical Research              | 4 |
| Liver International                                    | 4 |
| Oncotarget                                             | 4 |
| Therapeutic Drug Monitoring                            | 4 |
| Biomarkers                                             | 3 |
| Cytokine                                               | 3 |
| Gene                                                   | 3 |
| International Journal of Medical Sciences              | 3 |
| Journal of Gastroenterology and Hepatology (Australia) | 3 |
| Journal of Hepatology                                  | 3 |
| Journal of Surgical Research                           | 3 |
| Scientific Reports                                     | 3 |
| Transplant Infectious Disease                          | 3 |
| World Journal of Surgery                               | 3 |



|                                                      |   |
|------------------------------------------------------|---|
| Abdominal Imaging                                    | 2 |
| American Journal of Transplantation                  | 2 |
| Annals of Surgical Oncology                          | 2 |
| Archives of Medical Research                         | 2 |
| Asian Pacific Journal of Cancer Prevention           | 2 |
| BioMed Research International                        | 2 |
| BMC Infectious Diseases                              | 2 |
| Brazilian Journal of Medical and Biological Research | 2 |
| British Journal of Radiology                         | 2 |
| Cancer Letters                                       | 2 |
| Clinical Chemistry and Laboratory Medicine           | 2 |
| Clinical Imaging                                     | 2 |
| Digestion                                            | 2 |
| Digestive Diseases and Sciences                      | 2 |
| European Journal of Radiology                        | 2 |
| European Surgical Research                           | 2 |
| Hepatitis Monthly                                    | 2 |
| Hepatology                                           | 2 |
| Hepatology Research                                  | 2 |

|    |                                                                 |   |
|----|-----------------------------------------------------------------|---|
| 1  |                                                                 |   |
| 2  |                                                                 |   |
| 3  |                                                                 |   |
| 4  | Immunopharmacology and Immunotoxicology                         | 2 |
| 5  |                                                                 |   |
| 6  | International Journal of Clinical Pharmacology and Therapeutics | 2 |
| 7  |                                                                 |   |
| 8  | Journal of Cardiothoracic Surgery                               | 2 |
| 9  |                                                                 |   |
| 10 | Journal of Immunology Research                                  | 2 |
| 11 |                                                                 |   |
| 12 | Journal of Surgical Oncology                                    | 2 |
| 13 |                                                                 |   |
| 14 | Latin American Journal of Pharmacy                              | 2 |
| 15 |                                                                 |   |
| 16 | Medical Science Monitor                                         | 2 |
| 17 |                                                                 |   |
| 18 | Microbial Ecology                                               | 2 |
| 19 |                                                                 |   |
| 20 | OncoTargets and Therapy                                         | 2 |
| 21 |                                                                 |   |
| 22 | Pharmacogenomics                                                | 2 |
| 23 |                                                                 |   |
| 24 | Postgraduate Medical Journal                                    | 2 |
| 25 |                                                                 |   |
| 26 | Surgery Today                                                   | 2 |
| 27 |                                                                 |   |
| 28 | Therapeutics and Clinical Risk Management                       | 2 |
| 29 |                                                                 |   |
| 30 | Transplant Immunology                                           | 2 |
| 31 |                                                                 |   |
| 32 | Tumor Biology                                                   | 2 |
| 33 |                                                                 |   |
| 34 | World Journal of Surgical Oncology                              | 2 |
| 35 |                                                                 |   |
| 36 | Acta Anaesthesiologica Scandinavica                             | 1 |
| 37 |                                                                 |   |
| 38 | Acta Cardiologica                                               | 1 |
| 39 |                                                                 |   |
| 40 | Alcohol                                                         | 1 |
| 41 |                                                                 |   |
| 42 |                                                                 |   |
| 43 |                                                                 |   |
| 44 |                                                                 |   |
| 45 |                                                                 |   |
| 46 |                                                                 |   |
| 47 |                                                                 |   |
| 48 |                                                                 |   |
| 49 |                                                                 |   |
| 50 |                                                                 |   |
| 51 |                                                                 |   |
| 52 |                                                                 |   |
| 53 |                                                                 |   |
| 54 |                                                                 |   |
| 55 |                                                                 |   |
| 56 |                                                                 |   |
| 57 |                                                                 |   |
| 58 |                                                                 |   |
| 59 |                                                                 |   |
| 60 |                                                                 |   |

|                                                     |   |
|-----------------------------------------------------|---|
| American Journal of Chinese Medicine                | 1 |
| American Journal of Roentgenology                   | 1 |
| Annals of Hepatology                                | 1 |
| ASAIO Journal                                       | 1 |
| Asian Journal of Andrology                          | 1 |
| Biochemical and Biophysical Research Communications | 1 |
| Biomedicine and Pharmacotherapy                     | 1 |
| BMC Gastroenterology                                | 1 |
| BMC neurology                                       | 1 |
| BMJ Open                                            | 1 |
| Brain Imaging and Behavior                          | 1 |
| Brain Research                                      | 1 |
| Cancer Biology & Therapy                            | 1 |
| Cancer Biology and Therapy                          | 1 |
| Cancer Gene Therapy                                 | 1 |
| CardioVascular and Interventional Radiology         | 1 |
| Cell Biochemistry and Biophysics                    | 1 |
| Clinica Chimica Acta                                | 1 |
| Clinical and Developmental Immunology               | 1 |

|                                                          |   |
|----------------------------------------------------------|---|
| Clinical and Experimental Metastasis                     | 1 |
| Clinical Cancer Research                                 | 1 |
| Clinical Genetics                                        | 1 |
| Clinical Laboratory                                      | 1 |
| Clinical Pharmacokinetics                                | 1 |
| Clinical Therapeutics                                    | 1 |
| Clinical transplants                                     | 1 |
| Cytotherapy                                              | 1 |
| Diagnostic Pathology                                     | 1 |
| Digestive and Liver Disease                              | 1 |
| Digestive Surgery                                        | 1 |
| Disease Markers                                          | 1 |
| Drug Metabolism and Pharmacokinetics                     | 1 |
| European Journal of Medical Research                     | 1 |
| European Journal of Pharmaceutical Sciences              | 1 |
| European Review for Medical and Pharmacological Sciences | 1 |
| Focus on Alternative and Complementary Therapies         | 1 |
| Formosan Journal of Surgery                              | 1 |
| Gut and Liver                                            | 1 |

|                                                              |   |
|--------------------------------------------------------------|---|
| Human Vaccines and Immunotherapeutics                        | 1 |
| Interactive Cardiovascular and Thoracic Surgery              | 1 |
| International Anesthesiology Clinics                         | 1 |
| International Immunopharmacology                             | 1 |
| International Journal of Biological Sciences                 | 1 |
| International Journal of Cancer                              | 1 |
| International Journal of Cardiology                          | 1 |
| International Journal of Clinical & Experimental Pathology   | 1 |
| International Journal of Clinical and Experimental Pathology | 1 |
| International Journal of Clinical Oncology                   | 1 |
| International Journal of Hyperthermia                        | 1 |
| International Journal of Immunogenetics                      | 1 |
| Investigational New Drugs                                    | 1 |
| Journal of Cardiovascular Surgery                            | 1 |
| Journal of Clinical Nursing                                  | 1 |
| Journal of Clinical Pharmacology                             | 1 |
| Journal of Clinical Pharmacy and Therapeutics                | 1 |
| Journal of Clinical Virology                                 | 1 |
| Journal of Critical Care                                     | 1 |

|                                                    |   |
|----------------------------------------------------|---|
| Journal of Diabetes Investigation                  | 1 |
| Journal of Diabetes.                               | 1 |
| Journal of Gastrointestinal and Liver Diseases     | 1 |
| Journal of Hepato-Biliary-Pancreatic Sciences      | 1 |
| Journal of Infection                               | 1 |
| Journal of Nanoscience and Nanotechnology          | 1 |
| Journal of Occupational and Environmental Medicine | 1 |
| Journal of Parenteral and Enteral Nutrition        | 1 |
| Journal of Research in Medical Sciences            | 1 |
| Journal of Thoracic and Cardiovascular Surgery     | 1 |
| Journal of Thoracic Disease                        | 1 |
| Journal of Translational Medicine                  | 1 |
| Journal of Ultrasound in Medicine                  | 1 |
| Journal of Vascular and Interventional Radiology   | 1 |
| Journal of Virological Methods                     | 1 |
| Korean Journal of Radiology                        | 1 |
| Liver International.                               | 1 |
| Mediators of Inflammation                          | 1 |
| Medicinal Chemistry                                | 1 |

|    |                                                               |   |
|----|---------------------------------------------------------------|---|
| 1  |                                                               |   |
| 2  |                                                               |   |
| 3  |                                                               |   |
| 4  | Metabolic Brain Disease                                       | 1 |
| 5  |                                                               |   |
| 6  |                                                               |   |
| 7  | Minerva Anestesiologica                                       | 1 |
| 8  |                                                               |   |
| 9  |                                                               |   |
| 10 | Molecular Carcinogenesis                                      | 1 |
| 11 |                                                               |   |
| 12 |                                                               |   |
| 13 | Molecular Genetics and Metabolism                             | 1 |
| 14 |                                                               |   |
| 15 |                                                               |   |
| 16 | Molecular Oncology                                            | 1 |
| 17 |                                                               |   |
| 18 |                                                               |   |
| 19 | Pakistan Journal of Medical Sciences                          | 1 |
| 20 |                                                               |   |
| 21 |                                                               |   |
| 22 | Pediatric Transplantation                                     | 1 |
| 23 |                                                               |   |
| 24 |                                                               |   |
| 25 | Pharmacology                                                  | 1 |
| 26 |                                                               |   |
| 27 |                                                               |   |
| 28 | Pharmazie                                                     | 1 |
| 29 |                                                               |   |
| 30 |                                                               |   |
| 31 | PLoS ONE [Electronic Resource]                                | 1 |
| 32 |                                                               |   |
| 33 |                                                               |   |
| 34 | Proteome Science                                              | 1 |
| 35 |                                                               |   |
| 36 |                                                               |   |
| 37 | Renal Failure                                                 | 1 |
| 38 |                                                               |   |
| 39 |                                                               |   |
| 40 | Respiratory Care                                              | 1 |
| 41 |                                                               |   |
| 42 |                                                               |   |
| 43 | Scandinavian Journal of Clinical and Laboratory Investigation | 1 |
| 44 |                                                               |   |
| 45 |                                                               |   |
| 46 | Surgical Practice                                             | 1 |
| 47 |                                                               |   |
| 48 |                                                               |   |
| 49 | Thrombosis Research                                           | 1 |
| 50 |                                                               |   |
| 51 |                                                               |   |
| 52 | Transplant International                                      | 1 |
| 53 |                                                               |   |
| 54 |                                                               |   |
| 55 | Tumori                                                        | 1 |
| 56 |                                                               |   |
| 57 |                                                               |   |
| 58 | Turkish Journal of Gastroenterology                           | 1 |
| 59 |                                                               |   |
| 60 |                                                               |   |

|                                    |   |
|------------------------------------|---|
| Ultrasound in Medicine and Biology | 1 |
| Viral Immunology                   | 1 |
| World Journal of Pediatrics        | 1 |
| Xenobiotica                        | 1 |

For peer review only



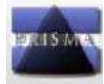

# PRISMA 2009 Checklist

| Section/topic             | # | Checklist item                                                                                                                                                                                                                                                                                              | Reported on page #                                                               |
|---------------------------|---|-------------------------------------------------------------------------------------------------------------------------------------------------------------------------------------------------------------------------------------------------------------------------------------------------------------|----------------------------------------------------------------------------------|
| <b>TITLE</b>              |   |                                                                                                                                                                                                                                                                                                             |                                                                                  |
| Title                     | 1 | Identify the report as a systematic review, meta-analysis, or both.                                                                                                                                                                                                                                         | Identified as a scoping report, Title page                                       |
| <b>ABSTRACT</b>           |   |                                                                                                                                                                                                                                                                                                             |                                                                                  |
| Structured summary        | 2 | Provide a structured summary including, as applicable: background; objectives; data sources; study eligibility criteria, participants, and interventions; study appraisal and synthesis methods; results; limitations; conclusions and implications of key findings; systematic review registration number. | Structured summary included; study not registered                                |
| <b>INTRODUCTION</b>       |   |                                                                                                                                                                                                                                                                                                             |                                                                                  |
| Rationale                 | 3 | Describe the rationale for the review in the context of what is already known.                                                                                                                                                                                                                              | See p.2,3                                                                        |
| Objectives                | 4 | Provide an explicit statement of questions being addressed with reference to participants, interventions, comparisons, outcomes, and study design (PICOS).                                                                                                                                                  | Not applicable as this is not a comparative study.<br>Research question on p. 5. |
| <b>METHODS</b>            |   |                                                                                                                                                                                                                                                                                                             |                                                                                  |
| Protocol and registration | 5 | Indicate if a review protocol exists, if and where it can be accessed (e.g., Web address), and, if available, provide registration information including registration number.                                                                                                                               | There is no published protocol for this study                                    |
| Eligibility criteria      | 6 | Specify study characteristics (e.g., PICOS, length of follow-up) and report characteristics (e.g., years considered, language, publication status) used as criteria for eligibility, giving rationale.                                                                                                      | Study characteristics described on p. 5                                          |
| Information sources       | 7 | Describe all information sources (e.g., databases with dates of coverage, contact with study authors to identify additional studies) in the search and date last searched.                                                                                                                                  | Information sources                                                              |

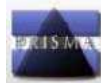

# PRISMA 2009 Checklist

1  
2  
3  
4  
5  
6  
7  
8  
9  
10  
11  
12  
13  
14  
15  
16  
17  
18  
19  
20  
21  
22  
23  
24  
25  
26  
27  
28  
29  
30  
31  
32  
33  
34  
35  
36  
37  
38  
39  
40  
41  
42  
43  
44  
45  
46  
47

|                                    |    |                                                                                                                                                                                                                        |                                            |
|------------------------------------|----|------------------------------------------------------------------------------------------------------------------------------------------------------------------------------------------------------------------------|--------------------------------------------|
|                                    |    |                                                                                                                                                                                                                        | described on p. 5.                         |
| Search                             | 8  | Present full electronic search strategy for at least one database, including any limits used, such that it could be repeated.                                                                                          | This is provided in Supplementary file 1   |
| Study selection                    | 9  | State the process for selecting studies (i.e., screening, eligibility, included in systematic review, and, if applicable, included in the meta-analysis).                                                              | Described on p. 6                          |
| Data collection process            | 10 | Describe method of data extraction from reports (e.g., piloted forms, independently, in duplicate) and any processes for obtaining and confirming data from investigators.                                             | Described on p. 7                          |
| Data items                         | 11 | List and define all variables for which data were sought (e.g., PICOS, funding sources) and any assumptions and simplifications made.                                                                                  | Described on p. 8 and Supplementary file 2 |
| Risk of bias in individual studies | 12 | Describe methods used for assessing risk of bias of individual studies (including specification of whether this was done at the study or outcome level), and how this information is to be used in any data synthesis. | N/A                                        |
| Summary measures                   | 13 | State the principal summary measures (e.g., risk ratio, difference in means).                                                                                                                                          | N/A                                        |
| Synthesis of results               | 14 | Describe the methods of handling data and combining results of studies, if done, including measures of consistency (e.g., $I^2$ ) for each meta-analysis.                                                              | N/A                                        |

Page 1 of 2

| Section/topic               | #  | Checklist item                                                                                                                               | Reported on page #                                                                                                        |
|-----------------------------|----|----------------------------------------------------------------------------------------------------------------------------------------------|---------------------------------------------------------------------------------------------------------------------------|
| Risk of bias across studies | 15 | Specify any assessment of risk of bias that may affect the cumulative evidence (e.g., publication bias, selective reporting within studies). | No formal risk of bias, but there is a lot of redundant publication. We have indicated potential unreliability of data on |

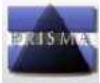

# PRISMA 2009 Checklist

1  
2  
3  
4  
5  
6  
7  
8  
9  
10  
11  
12  
13  
14  
15  
16  
17  
18  
19  
20  
21  
22  
23  
24  
25  
26  
27  
28  
29  
30  
31  
32  
33  
34  
35  
36  
37  
38  
39  
40  
41  
42  
43  
44  
45  
46  
47

|                               |    |                                                                                                                                                                                                          |                                                |
|-------------------------------|----|----------------------------------------------------------------------------------------------------------------------------------------------------------------------------------------------------------|------------------------------------------------|
|                               |    |                                                                                                                                                                                                          | p. 24.                                         |
| Additional analyses           | 16 | Describe methods of additional analyses (e.g., sensitivity or subgroup analyses, meta-regression), if done, indicating which were pre-specified.                                                         | N/A                                            |
| <b>RESULTS</b>                |    |                                                                                                                                                                                                          |                                                |
| Study selection               | 17 | Give numbers of studies screened, assessed for eligibility, and included in the review, with reasons for exclusions at each stage, ideally with a flow diagram.                                          | See p and Figure 1                             |
| Study characteristics         | 18 | For each study, present characteristics for which data were extracted (e.g., study size, PICOS, follow-up period) and provide the citations.                                                             | Data extraction items are listed in Appendix 2 |
| Risk of bias within studies   | 19 | Present data on risk of bias of each study and, if available, any outcome level assessment (see item 12).                                                                                                | N/A                                            |
| Results of individual studies | 20 | For all outcomes considered (benefits or harms), present, for each study: (a) simple summary data for each intervention group (b) effect estimates and confidence intervals, ideally with a forest plot. | N/A as no intervention groups                  |
| Synthesis of results          | 21 | Present results of each meta-analysis done, including confidence intervals and measures of consistency.                                                                                                  | N/A                                            |
| Risk of bias across studies   | 22 | Present results of any assessment of risk of bias across studies (see Item 15).                                                                                                                          | N/A                                            |
| Additional analysis           | 23 | Give results of additional analyses, if done (e.g., sensitivity or subgroup analyses, meta-regression [see Item 16]).                                                                                    | Descriptive analyses only                      |
| <b>DISCUSSION</b>             |    |                                                                                                                                                                                                          |                                                |
| Summary of evidence           | 24 | Summarize the main findings including the strength of evidence for each main outcome; consider their relevance to key groups (e.g., healthcare providers, users, and policy makers).                     | Strength of evidence not applicable            |
| Limitations                   | 25 | Discuss limitations at study and outcome level (e.g., risk of bias), and at review-level (e.g., incomplete retrieval of identified research, reporting bias).                                            | See p. 24.                                     |
| Conclusions                   | 26 | Provide a general interpretation of the results in the context of other evidence, and implications for future research.                                                                                  | See pp. 21-4                                   |
| <b>FUNDING</b>                |    |                                                                                                                                                                                                          |                                                |

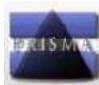

# PRISMA 2009 Checklist

1  
2  
3  
4  
5  
6  
7  
8  
9  
10  
11  
12  
13  
14  
15  
16  
17  
18  
19  
20  
21  
22  
23  
24  
25  
26  
27  
28  
29  
30  
31  
32  
33  
34  
35  
36  
37  
38  
39  
40  
41  
42  
43  
44  
45  
46  
47

|         |    |                                                                                                                                            |                                       |
|---------|----|--------------------------------------------------------------------------------------------------------------------------------------------|---------------------------------------|
| Funding | 27 | Describe sources of funding for the systematic review and other support (e.g., supply of data); role of funders for the systematic review. | There was no funding for this review. |
|---------|----|--------------------------------------------------------------------------------------------------------------------------------------------|---------------------------------------|

From: Moher D, Liberati A, Tetzlaff J, Altman DG, The PRISMA Group (2009). Preferred Reporting Items for Systematic Reviews and Meta-Analyses: The PRISMA Statement. PLoS Med 6(7): e1000097. doi:10.1371/journal.pmed1000097

For more information, visit: [www.prisma-statement.org](http://www.prisma-statement.org).

Page 2 of 2

For peer review only

# BMJ Open

## Compliance with ethical standards in the reporting of donor sources and ethics review in peer-reviewed publications involving organ transplantation in China: A scoping review

|                                 |                                                                                                                                                                                                                                                                                                                                                                                                                                                                                             |
|---------------------------------|---------------------------------------------------------------------------------------------------------------------------------------------------------------------------------------------------------------------------------------------------------------------------------------------------------------------------------------------------------------------------------------------------------------------------------------------------------------------------------------------|
| Journal:                        | <i>BMJ Open</i>                                                                                                                                                                                                                                                                                                                                                                                                                                                                             |
| Manuscript ID                   | bmjopen-2018-024473.R1                                                                                                                                                                                                                                                                                                                                                                                                                                                                      |
| Article Type:                   | Research                                                                                                                                                                                                                                                                                                                                                                                                                                                                                    |
| Date Submitted by the Author:   | 10-Aug-2018                                                                                                                                                                                                                                                                                                                                                                                                                                                                                 |
| Complete List of Authors:       | Rogers, Wendy; Macquarie University, Clinical Medicine<br>Robertson, Matthew; Human Rights Law Foundation, Human Rights Law Foundation<br>Ballantyne, Angela; University of Otago,<br>Blakely, Brette; Macquarie University, Australian Institute of Health Innovation<br>Catsanos, Ruby; No institutional affiliation<br>Clay-Williams, Robyn; Macquarie University, Australian Institute of Health Innovation<br>Fiatarone Singh, Maria; University of Sydney, Faculty of Health Sciences |
| <b>Primary Subject Heading</b>: | Ethics                                                                                                                                                                                                                                                                                                                                                                                                                                                                                      |
| Secondary Subject Heading:      | Medical publishing and peer review                                                                                                                                                                                                                                                                                                                                                                                                                                                          |
| Keywords:                       | organ donation, China, publication ethics, scoping review, executed prisoners                                                                                                                                                                                                                                                                                                                                                                                                               |
|                                 |                                                                                                                                                                                                                                                                                                                                                                                                                                                                                             |

SCHOLARONE™  
Manuscripts

1  
2  
3 **Compliance with ethical standards in the reporting of donor sources and ethics review**  
4 **in peer-reviewed publications involving organ transplantation in China: A scoping**  
5 **review**  
6  
7  
8  
9

10  
11 Wendy Rogers (corresponding author), Department of Clinical Medicine and Department of  
12  
13 Philosophy, Macquarie University, Sydney, Australia.

14  
15  
16 [wendy.rogers@mq.edu.au](mailto:wendy.rogers@mq.edu.au)

17  
18 Department of Philosophy, Macquarie University, NSW 2109, Australia

19  
20 +61 2 9850 8858  
21  
22

23  
24 Matthew Robertson, Human Rights Law Foundation, New York. [mprob7@gmail.com](mailto:mprob7@gmail.com)  
25  
26

27  
28 Angela Ballantyne, Department of Primary Health Care & General Practice, University of  
29  
30 Otago, Wellington, New Zealand. [angela.ballantyne@otago.ac.nz](mailto:angela.ballantyne@otago.ac.nz)  
31  
32

33  
34  
35 Brette Blakely, Australian Institute of Health Innovation, Macquarie University, Sydney,  
36  
37 Australia. [brette.blakely@mq.edu.au](mailto:brette.blakely@mq.edu.au)  
38  
39

40  
41 Ruby Catsanos, No institutional affiliation, Sydney, Australia.  
42

43  
44 [rbycatsanos@gmail.com](mailto:rbycatsanos@gmail.com)  
45  
46

47  
48 Robyn Clay-Williams, Australian Institute of Health Innovation, Macquarie University,  
49  
50 Sydney, Australia. [robyn.clay-williams@mq.edu.au](mailto:robyn.clay-williams@mq.edu.au)  
51  
52  
53  
54  
55  
56  
57  
58  
59  
60

1  
2  
3 Maria Fiatarone Singh, Faculty of Health Sciences, University of Sydney, Australia.

4 [maria.fiataronesingh@sydney.edu.au](mailto:maria.fiataronesingh@sydney.edu.au)

5  
6  
7  
8  
9  
10  
11 **Key words**

12 Organ donation, China, Publication ethics, scoping review, executed

13  
14  
15 prisoners

16  
17  
18  
19  
20 **Word count**

21 4336 excluding tables and references

## Abstract

**Objectives:** The objective of this study is to investigate whether papers reporting research on Chinese transplant recipients comply with international professional standards aimed at excluding publication of research that: (1) involves any biological material from executed prisoners; (2) lacks Institutional Review Board approval; and (3) lacks consent of donors.

**Design:** Scoping review based on Arksey and O'Mallee's methodological framework.

**Data sources:** Medline, Scopus and Embase were searched from January 2000 to April 2017.

**Eligibility criteria:** We included research papers published in peer-reviewed English language journals reporting on outcomes of research involving recipients of transplanted hearts, livers or lungs in mainland China.

**Data extraction and synthesis:** Data were extracted by individual authors working independently following training and benchmarking. Descriptive statistics were compiled using Excel.

**Results:** 445 included studies reported on outcomes of 85,477 transplants. 412 (92.5%) failed to report whether or not organs were sourced from executed prisoners; and 439 (99%) failed to report that organ sources gave consent for transplantation. In contrast, 324 (73%) reported approval from an IRB. Of the papers claiming that no prisoners' organs were involved in the transplants, 19 of them involved 2,688 transplants that took place prior to 2010, when there was no volunteer donor program in China.

**Discussion:** The transplant research community has failed to implement ethical standards banning publication of research using material from executed prisoners. As a result, a large body of unethical research now exists, raising issues of complicity and moral hazard to the extent that the transplant community uses and benefits from the results of this research. We call for retraction of this literature pending investigation of individual papers.



### Strengths and weaknesses of this study

- The study's main strengths lie in its originality and in the use of robust scoping review methods, giving confidence that the results are reliable.
- However, scoping review methods are less rigorous than systematic reviews and it is possible that some relevant papers were not included.
- Publications were excluded if they were in languages other than English, or published in Chinese journals, regardless of the language of publication.
- The data in the included studies was of poor quality. It is possible that a small number of liver transplants classified as deceased donor were from living donors.
- The total number of participants (and hence number of transplants) in the included studies is inflated by multiple publication of the same and overlapping research cohorts.

## Introduction

The transplantation of organs procured from executed prisoners is widely condemned by bodies including the World Health Organisation,[1] the World Medical Association,[2] The Transplantation Society,[3] Amnesty International and the Declaration of Istanbul.[4,5] This condemnation extends to undertaking research and presenting results that involve the use of organs obtained from executed prisoners.[4] In 2006, The Transplantation Society (TTS) explicitly stated that it would not accept conference papers based on research involving organs sourced from executed prisoners.[6,7] The 2006 policy statement by TTS was followed by calls for a boycott on accepting conference papers or publishing journal articles based on research involving organs from executed prisoners.[8–10] Some journals explicitly adopted this ban as policy (*Journal of Clinical Investigation*,[11] *American Journal of Transplantation* and the *Journal of Heart and Lung Transplantation*).[9]

Together, these statements by international bodies, professional societies, academics and journals constitute explicit ethical standards prohibiting the publication or presentation of research involving organs sourced from executed prisoners. These standards are primarily directed towards peer-reviewers, editors and publishers. However, these standards lack regulatory force; there are no sanctions for breaches, and to date there has been no audit investigating compliance.

This study is the first attempt to track the progress of the transplant community in meeting this ethical injunction to avoid publication of research based on organs sourced from executed prisoners.

## Background

The prohibition against the use of executed prisoners' organs is explicitly directed towards China, which is one of the few countries where the use of prisoners' organs has been

1  
2  
3 government-sanctioned. In 2001, a Chinese official dismissed as “sensational lies” reports of  
4 organ harvesting from executed prisoners, claiming that the major source of organs was  
5 voluntary donations.[12] This rhetoric changed in 2006 when Chinese officials first openly  
6 acknowledged that the majority of transplanted organs were sourced from executed  
7 prisoners.[13,14] In 2007, China claimed it would reduce reliance on executed prisoners,[15]  
8 but in a 2015 interview, Huang Jiefu, China’s most senior transplant official, stated that there  
9 had been just 120 cases of volunteer donors up to 2009.[16] In 2014 Huang committed China  
10 to using only organs from volunteer donors from 1 January 2015.[17] However, the use of  
11 prisoners’ organs remains technically legal today in China if ‘consent’ is obtained,[18] and in  
12 2017 Chinese officials admitted that it is not possible to verify that all organ harvesting from  
13 prisoners has ceased.[19]

14  
15 Use of organs from executed prisoners is widely condemned because the coercive situation of  
16 being on death row undermines the possibility of ethically valid consent, or consent may not  
17 be sought at all.[20] In addition, in China there have been extensive and credible reports of  
18 non-voluntary organ harvesting from prisoners of conscience, adding to ethical  
19 concern.[21,22]

20  
21 The transplant community recognises that boycott is an effective way to express  
22 condemnation of Chinese organ procurement practices, leading to formal TTS policy and  
23 recommendations for banning unethical research as described above. Publication in  
24 international, peer-reviewed journals is a marker of academic success and international  
25 acceptance. Imposing a ban sends a strong message of disapprobation to researchers whose  
26 projects involve transplants of organs sourced from executed prisoners.

27  
28 The current approach to this issue taken by TTS and some journals is incremental rather than  
29 absolutist.[10] An ‘absolutist’ approach would ban publication of all Chinese transplant data  
30 until there is compelling positive evidence that the use of executed prisoners’ organs has

1  
2  
3 ceased. This would require free and full on-site inspections of Chinese transplant hospitals,  
4 including unfettered access to hospital information systems. China has not agreed to such  
5 inspections and no international or professional body has assumed responsibility for pursuing  
6 this issue. Instead, the professions' preferred incremental approach requires assessment of  
7 Chinese studies for ethical acceptability prior to publication, with exclusion of any that  
8 include data from executed prisoners. The incremental policy therefore requires peer-  
9 reviewers and journal editors to ask consistently whether the research: (1) involved any  
10 biological material sourced from executed prisoners; (2) received Institutional Review Board  
11 (IRB) (Research Ethics Committee) approval; and (3) required consent of donors. For  
12 transparency purposes this information should be included in the final publication.  
13  
14 Transparency contributes to a culture of accountability and ensures that readers are not  
15 unwittingly absorbing and using unethically obtained data. The burden of proof should rest  
16 with authors/researchers to supply evidence of consent to donation, and approval by an IRB,  
17 and attest that their study does not use material derived from executed prisoners.  
18  
19 In this study, we investigated the extent to which journals have complied with these ethical  
20 standards by: 1) publishing only research using organs from volunteer donors; 2) requiring a  
21 statement of IRB approval; and 3) providing a statement that consent was obtained from  
22 donors. As noted above, 'consent' obtained from executed prisoners does not meet  
23 international ethical standards.  
24  
25  
26  
27  
28  
29  
30  
31  
32  
33  
34  
35  
36  
37  
38  
39  
40  
41  
42  
43  
44  
45

## 46 **Methods**

47  
48 This research used scoping review methodology. Scoping reviews can be used to map an area  
49 of research, summarise existing evidence or identify gaps in the literature. Unlike systematic  
50 reviews, scoping reviews usually do not assess the quality of the included studies.[23] This  
51  
52  
53  
54  
55  
56  
57  
58  
59  
60

review followed the five steps articulated by Arksey and O'Mallee to ensure rigour, transparency and facilitate replication (see Table 1).[24]

Table 1: Arksey and O'Mallee's methodological framework for a scoping review

| Framework stage | Description                                      |
|-----------------|--------------------------------------------------|
| Stage 1         | Identifying the research question                |
| Stage 2         | Identifying relevant studies                     |
| Stage 3         | Study selection                                  |
| Stage 4         | Charting the data                                |
| Stage 5         | Collating, summarising and reporting the results |

The research question was identified and refined through discussion amongst the authors and expert colleagues. The final version was: "To what extent do papers reporting research on Chinese transplant recipients identify the sources of organs, whether sources were living or deceased, and compliance with ethical requirements for human research and organ donation as per international guidelines and professional standards?"

### *Search Strategy*

Relevant studies in English language journals were identified through searching online databases. The electronic search strategies were developed, tested and refined with the assistance of an expert librarian. The search aimed to identify full text papers published in English in peer-reviewed journals by authors based at Chinese institutions that reported on research involving recipients of solid organ transplants. The search strategies for Medline, Scopus and Embase are in Supplementary File 1. The inclusionary criteria were organ transplantation/transplant (title, abstract) and China (institution/affiliation). The exclusionary criteria were stem cells (title, abstract); mice (title, abstract); living donors (title, abstract); case reports/letters/editorials (document type). The searches were limited to English language

1  
2  
3 and humans, and the years were 2000-date of search. The start date of 2000 was selected as  
4 this is when numbers of transplantations and associated research papers rapidly increased in  
5  
6  
7 China.

8  
9 Medline, Scopus and Embase were searched on 5 April 2017 by WR, BB and RCW. All  
10  
11 relevant searches were downloaded into an EndNote library by WR. Duplicates were  
12  
13 removed by EndNote filter. We did not identify further papers from other sources or search  
14  
15 the references of included papers as we aimed to capture papers that are readily available  
16  
17 through mainstream databases, and this was a scoping rather than systematic review. We  
18  
19 recognised that our search strategy might potentially miss some papers published in difficult  
20  
21 to find journals as well as those published in languages other than English, with a potential  
22  
23 reduction in sensitivity. However, we do not think that papers omitted as a result of this  
24  
25 strategy undermine the reliability of the findings. Rather, these omissions may make our  
26  
27 estimate of the magnitude of any ethical breaches of publication standards conservative,  
28  
29 based on the assumption that ethical compliance is likely to be higher in international journals  
30  
31 published in English compared to journals published in China whether in Chinese or English  
32  
33 language.  
34  
35

36  
37 The title and abstracts remaining after removal of duplicates were screened for obvious  
38  
39 exclusionary factors, with each author screening an equal number. All authors were trained in  
40  
41 the use of the exclusionary criteria by screening the same 100 abstracts and titles. At the end  
42  
43 of the pilot process, the exclusionary criteria were refined following discussion. The final  
44  
45 exclusionary criteria for title and abstract screening were:

- 46  
47 ● transplants other than solid organs;
- 48  
49 ● transplants not occurring in mainland China;
- 50  
51 ● clinical case reports and/or incidental inclusion of data from Chinese transplant  
52  
53 recipients;  
54  
55

- meta-analyses and systematic reviews;
- animal research;
- English-language journals published in China.

Articles which could not be eliminated by title and abstract were reviewed as full text articles to determine eligibility. Prior to full text review, five of the authors (WR, MPR, RC, BB, RCW) undertook further training and benchmarking in use of the exclusionary criteria on full text papers. This involved all five screening the same 20 papers, followed by discussion. The exclusionary criteria were finalised after this process (see Table 2), and four authors (RC, WR, MPR, BB) assessed full text articles for eligibility.

Table 2: Exclusion criteria for full text review of papers

|                                                                                                                                                                        |
|------------------------------------------------------------------------------------------------------------------------------------------------------------------------|
| “Animal Research” – Exclude any non-human research                                                                                                                     |
| “Chinese Journal” – Exclude any papers published in (English language) journals published in China, on the assumption of low compliance with Western ethical standards |
| “Case Report” – Exclude papers reporting on clinical case reports                                                                                                      |
| “Incidental Inclusion” – Exclude papers where transplant recipients are incidentally included as research participants                                                 |
| “Kidneys” – Exclude any papers reporting data from kidney transplant recipients                                                                                        |
| “Living Donors” – Exclude papers where all the transplanted organs were procured from living donors, including split livers from living donors                         |
| “Not China” – Exclude any papers where the transplants took place outside mainland China                                                                               |
| “Not Reviewed” – Exclude any non peer reviewed publications (including commentaries, letter to editors etc.)                                                           |

|                       |                                                                                   |
|-----------------------|-----------------------------------------------------------------------------------|
| 1<br>2<br>3<br>4<br>5 | “Other Organs” – Exclude other tissue or organs i.e., not livers, hearts or lungs |
| 6<br>7<br>8           | “Other” – State reason                                                            |
| 9<br>10<br>11         | “Review Paper” – Exclude review papers (meta-analysis, systematic reviews etc.)   |

12  
13  
14 The reasons for exclusion were recorded, but where more than one reason was present, only  
15 the first reason noted by the data extractor was recorded. Papers reporting on recipients of  
16 kidney transplants were excluded at the full text review stage after a trial of 200 full text  
17 analyses. In this sample, 40% of kidney papers failed to report whether organ sources were  
18 living or deceased. As a key question in our research concerned procurement of organs from  
19 executed prisoners, we did not want to include a potentially large number of papers in which  
20 it was unclear whether or not organs were procured from living donors.  
21  
22

23  
24 The same four authors who determined eligibility of full text papers also extracted data from  
25 these papers onto pre-tested forms (see Supplementary File 2 for details extracted). Any  
26 details that could not be extracted with certainty were discussed by the group of authors to  
27 reach a consensus. No data extraction outcomes were unable to be resolved using this  
28 method. Data from 10% of included papers were checked by a second author.  
29  
30

31 This process is summarised in a PRISMA diagram (Figure 1).  
32  
33

34 *(Insert Figure 1 around here)*  
35  
36

#### 37 *Patient and Public Involvement*

38 There was no patient or public involvement in this scoping review of published literature.  
39  
40

## 41 **Results**

42 The searches identified 6723 records, leaving 4168 after duplicates were removed. After  
43 screening of abstracts and titles, 2489 records were excluded. 1679 full text articles were  
44  
45  
46  
47  
48  
49  
50



1  
2  
3 screened for eligibility. 1229 were excluded (see Table 3). 445 papers were included in the  
4  
5 final data set (see Supplementary File 3), and 5 papers were unavailable.[25–29]  
6  
7  
8

9  
10 Table 3: Reasons for exclusions of full text papers (n=1229)

| Reason               | Number |
|----------------------|--------|
| Animal Research      | 12     |
| Chinese Journal      | 96     |
| Case Report          | 3      |
| Incidental Inclusion | 14     |
| Kidneys              | 637    |
| Living Donors        | 7      |
| Not China            | 380    |
| Not Reviewed         | 1      |
| Other Organs         | 2      |
| Other                | 49     |
| Review Paper         | 28     |

11  
12  
13  
14  
15  
16  
17  
18  
19  
20  
21  
22  
23  
24  
25  
26  
27  
28  
29  
30  
31  
32  
33 The main results are summarised in Table 4. See Supplementary File 4 for a full table of  
34  
35 results.  
36  
37  
38  
39  
40  
41  
42  
43  
44  
45  
46  
47  
48  
49  
50  
51  
52  
53  
54  
55  
56  
57  
58  
59  
60

Table 4: Results summary table

| Variable                                                                                                | Number (%)    |
|---------------------------------------------------------------------------------------------------------|---------------|
| Total number of included papers                                                                         | 445 (100%)    |
| Total number of transplants reported                                                                    | 85,477        |
| Median number of transplants per paper (range)                                                          | 72 (1-20,524) |
| Number of papers that explicitly stated organs (hearts, livers, lungs) were from deceased sources       | 173 (39%)     |
| Number of papers reporting research ethics approval                                                     | 324 (73%)     |
| Number of papers with any information on the identity of the sources of organs                          | 63 (14%)      |
| Number of papers with explicit statement that no organs from prisoners were used                        | 33 (7%)       |
| Number of papers that reported consent for donation                                                     | 6 (1%)        |
| Number of papers with any statement about the type of donation (after brain death, after cardiac death) | 64 (14%)      |

Overall, 324 (73%) of the 445 papers included a statement regarding approval from an institutional or regional ethics committee. Most of these statements were of a general type such as: “The study protocol was conducted in accordance with the standards of the Declaration of Helsinki and current ethical guidelines”[30]; “All protocols were approved by the ethics committee of the institution before the study began, and the protocols conformed to

1  
2  
3 the ethical guidelines of the 1975 Helsinki Declaration”[31] and “The present study was  
4 approved by the ethics committee of Qingdao University (Qingdao, China)”.[32] Few  
5 contained an IRB reference number or the date approval was granted. The majority of these  
6 statements reported that research participants (who were the transplant *recipients*) had given  
7 their informed consent.  
8  
9

10  
11  
12  
13 The graph in Figure 2 shows ethics approvals by year. These increased substantially after  
14 2006, which was the year that The Transplantation Society published its policy banning  
15 conference papers based on data from executed prisoners.[7]  
16  
17

18  
19  
20 *(Insert Figure 2 around here)*  
21  
22

23 Only 63 papers (14%; see Supplementary File 5) included any information about the source  
24 of the organs (i.e., whether or not the organs came from executed prisoners or volunteers, or  
25 if consent was given). This category of organ sources (donor identity) was interpreted  
26 inclusively. For example, papers reporting that sources gave informed consent were included  
27 here even if there was no explicit statement that the sources were not prisoners. Under  
28 Chinese policy, prisoners are permitted to make allegedly voluntary donations, which is in  
29 violation of TTS policy.[33] The presence or absence of statements identifying organ sources  
30 by year is in Figure 3. Only one paper published prior to 2007 included any information  
31 about identity of sources.[34]  
32  
33

34  
35  
36  
37  
38  
39  
40  
41  
42 *(Insert Figure 3 around here)*  
43  
44

45  
46 Among the 63 papers that provided any information about the sources of organs, 33 (only  
47 7.4% of all included studies) stated explicitly that no organs from executed prisoners were  
48 used in the transplantations.[30,31,34–65] Five of these also stated explicitly that organs were  
49 sourced from volunteers.[35,39,46,48,61] Three of the 33 reported that informed consent was  
50 obtained from sources or their families, and these three papers also included a statement  
51  
52  
53  
54  
55  
56  
57  
58  
59  
60

about ethics review.[30,47,61] That is, less than one per cent of included studies contain all three pieces of information mandated by TTS.

However, the claims that organs were not procured from prisoners cannot be true in many of these 33 papers. According to Chinese reports, there were only 120 voluntary donors in the whole of China up until to 2009[16], and donation numbers were low during the nascent volunteer donor program from 2010-2014 (see Table 5).[66]

Table 5: Numbers of volunteer organ donors in China 2000-2014

| Year       | Number of volunteer donations according to Chinese sources |
|------------|------------------------------------------------------------|
| Up to 2009 | 120 [16]                                                   |
| 2010       | 34 [66]                                                    |
| 2011       | 132 [66]                                                   |
| 2012       | 433 [66]                                                   |
| 2013       | 849 [66]                                                   |
| 2014       | 1702 [66]                                                  |

Yet 19 of the 33 papers claiming that organs were not procured from executed prisoners reported on 2,688 transplants that took place prior to 2010.[34,36–38,53,54,61,63,67–77] One of these did not date the transplants but was published in 2010 reporting on grafts that had been stable for at least 2 years, indicating that the transplants had taken place prior to 2010.[37] 8 of the 33 papers report on 1,212 transplants that occurred both before and after 2010 [30,31,35,39,43,52,59,62] and 6 of them report on 1,556 transplants that took place during the period 2010-2014 during the pilot volunteer scheme.[17,42,55–57,60,64]

Turning to the 30 papers without explicit statement about prisoners, in 14 of these, statements indicated that organs were procured from volunteers, without specifying whether or not prisoners were excluded as volunteers.[78–91] Three of the 14 stated that informed consent was provided by donors or their families.[79,83,85]

Six papers reported that donors gave informed consent for donation, but did not record whether or not donors were volunteers or prisoners.[92–97]

There were 10 papers that contained information implying that donations were from voluntary, non-prisoner sources, without explicitly stating this, or that consent was provided.[98–107] The statements from these papers are in Table 6.

Table 6: Text from papers reported in “Other” category of donor ID information

|                                                                                                                                                                                     |
|-------------------------------------------------------------------------------------------------------------------------------------------------------------------------------------|
| All the donors were from traffic accidents or cerebral bleeding coma [98]                                                                                                           |
| No organ trafficking involved [99]                                                                                                                                                  |
| Organ donation was conducted legally, following local regulations [100]                                                                                                             |
| Five donors were brain dead due to car accident, their respiration was maintained by mechanical ventilation and hemodynamics was stabilized by minimum doses of catecholamine [101] |
| The deceased donor livers were obtained through both social and legal donation [102]                                                                                                |
| The donation procedure followed the DCD guidelines of China [103]                                                                                                                   |
| Severe injuries and traffic accidents were the main reasons for DCD [104]                                                                                                           |
| Normal control hearts came from autopsies or donors with no history of heart disease who died in accidents [105]                                                                    |

1  
2  
3 All the DBCD grafts were procured under controlled condition. Detailed  
4 information of the DBCD donors was obtained from The Chinese Red Cross  
5 and the OPO records. [106]  
6  
7

8  
9 All donors were in hospital's ICU before death. (cause of death for each  
10 donor is supplied in a table) [107]  
11  
12

13  
14 These statements do not necessarily preclude inclusion of organs procured from executed  
15 prisoners. For example, two papers refer to legal donation,[100,102] which might include  
16 organs from executed prisoners. Two papers refer to donors dying from severe injuries or in  
17 accidents. While these are potentially legitimate causes of death for organ donors, it is  
18 possible that these could be extreme euphemisms for deaths caused by execution.[104,105]  
19  
20 Looking at all of the organ source ID statements by year of transplant, there are a total of 30  
21 papers that either stated explicitly that no organs from prisoners were used (18) or indicated  
22 that organs were sourced voluntary and/or with consent during the time period when executed  
23 prisoners were virtually the sole source (there were 120 volunteer donations across all of  
24 China in this period). These data are in Table 7, along with the same data for the whole set of  
25 included papers. Of the 445 papers, 192 (43%) report on research that took place when the  
26 only organs available for transplant were from executed prisoners, while another 148 (33%)  
27 spanned the start of the volunteer donor pilot so must include at least some data derived from  
28 executed prisoners.  
29  
30  
31  
32  
33  
34  
35  
36  
37  
38  
39  
40  
41  
42  
43  
44  
45  
46  
47  
48  
49  
50  
51  
52  
53  
54  
55  
56  
57  
58  
59  
60

Table 7: Numbers of papers, including those with organ source identity statements by years and numbers of transplants

|                                                                                              | No date of transplants in papers | All transplants prior to 2010* | Transplants before and after 2010 when volunteer pilot started | All transplants took place during pilot 2010-2014 | Transplants occurred before and after 2014 | All transplants occurred post 2014 |
|----------------------------------------------------------------------------------------------|----------------------------------|--------------------------------|----------------------------------------------------------------|---------------------------------------------------|--------------------------------------------|------------------------------------|
| Total included papers                                                                        | 61                               | 192                            | 148                                                            | 38                                                | 6                                          | 0                                  |
| Total number of transplants                                                                  | 2,959                            | 28,442                         | 49,376                                                         | 3,937                                             | 763                                        | 0                                  |
| 33 papers claiming no executed prisoners (No. of transplants)                                |                                  | 19<br>(2,688)                  | 8<br>(1,212)                                                   | 6<br>(1,556)                                      | 0                                          | 0                                  |
| 14 papers claiming volunteers (No. of transplants)                                           | 1<br>(321)                       | 8<br>(2,269)                   | 4<br>(387)                                                     | 1<br>(12)                                         | 0                                          | 0                                  |
| 6 papers claiming donors gave consent (No. of transplants)                                   | 1<br>(40)                        | 3<br>(200)                     | 2<br>(1,197)                                                   | 0                                                 | 0                                          | 0                                  |
| 10 papers with statement about donors implying voluntariness or consent (No. of transplants) | 2<br>(11)                        | 0                              | 4<br>(619)                                                     | 4<br>(153)                                        | 0                                          | 0                                  |

\* In one paper[37] the dates of the transplants were not recorded, but the paper, published in 2010, reported on research subjects whose grafts had been stable for at least 2 years, indicating transplant prior to 2010.

The majority of the papers reporting on the identity of organ sources also reported some form of institutional ethics approval, but 7 papers did not.[37,38,44,79,94,96,107]

Turning to the journals that published the 445 papers, a full list of these is in Appendix 6.

Seventeen journals published 5 or more papers during the study period. In this subset of 17, the proportion with ethics statements ranged from 38-100%, while the proportion with donor identity statements ranged from 0-40%. (see Table 8)

Table 8: List of journals publishing 5 or more papers, and numbers of those papers in which there were ethics and/or organ source identity statements.

| Journal                                                     | CiteScore* | Total papers in journal out of 445 (%) | Number of papers with ethics statement (%) | Number of papers with donor ID (%) |
|-------------------------------------------------------------|------------|----------------------------------------|--------------------------------------------|------------------------------------|
| Transplantation Proceedings                                 | 0.98       | 65 (15%)                               | 25 (38%)                                   | 12 (18%)                           |
| PLoS ONE                                                    | 3.11       | 20 (4%)                                | 19 (95%)                                   | 5 (25%)                            |
| Clinical Transplantation                                    | 1.67       | 16 (4%)                                | 9 (56%)                                    | 3 (19%)                            |
| Liver Transplantation                                       | 2.50       | 15 (3%)                                | 12 (80%)                                   | 3 (20%)                            |
| Hepato-Gastroenterology                                     | 0.98       | 14 (3%)                                | 11 (79%)                                   | 2 (14%)                            |
| Experimental and Clinical Transplantation                   | 0.54       | 11 (2%)                                | 10 (91%)                                   | 1 (9%)                             |
| Clinics and Research in Hepatology and Gastroenterology     | 1.61       | 8 (2%)                                 | 7 (88%)                                    | 1 (13%)                            |
| International Journal of Clinical and Experimental Medicine | 1.17       | 8 (2%)                                 | 5 (63%)                                    | 1 (13%)                            |



|                                                     |      |        |          |         |
|-----------------------------------------------------|------|--------|----------|---------|
| Annals of Transplantation                           | 1·29 | 7 (2%) | 4 (57%)  | 0 (0%)  |
| International Journal of Clinical Practice          | 1·91 | 6 (1%) | 5 (83%)  | 0 (0%)  |
| Journal of Cancer Research and Clinical Oncology    | 3·32 | 6 (1%) | 5 (83%)  | 1 (17%) |
| Transplantation                                     | 2·71 | 6 (1%) | 5 (83%)  | 1 (17%) |
| European Journal of Gastroenterology and Hepatology | 1·88 | 5 (1%) | 5 (100%) | 1 (20%) |
| Experimental and Therapeutic Medicine               | 1·42 | 5 (1%) | 5 (100%) | 1 (20%) |
| Medical Oncology                                    | 1·91 | 5 (1%) | 5 (100%) | 0 (0%)  |
| Medicine (United States)                            | 1·63 | 5 (1%) | 5 (100%) | 1 (20%) |
| Surgery (United States)                             | 2·77 | 5 (1%) | 5 (100%) | 2 (40%) |

\*Average citations received per document published in the journal (Source: SCOPUS)

Finally, in terms of journals with specific policies banning publication of research based on use of prisoners' organs, our study identifies one paper published in the *American Journal of Transplantation* [89] and five papers published in *Transplantation* (the official journal of TTS) that appear to be in breach of their own stated policies.[94,108–111] One of these has over 300 citations.[109]

## Discussion

This study shows that the majority of the published literature identified in this scoping review reporting research on transplants in China from 2000-April 2017 fails to comply with ethical

standards regarding exclusion of research based on organs procured from prisoners. The body of literature contains a large number of papers that certainly, or almost certainly include data from executed prisoners given China's acknowledgement that during this period executed prisoners were the principal organ source. While TTS policy appears to have been partially successful in that the number of papers claiming IRB approvals rose steeply after that policy was published in 2006, the inclusion of this information has not addressed the major underlying concern about use of prisoners' organs. This is because the ethics review process focuses on the protection of research participants and their informed consent for participation in research. In transplant research, it is the recipients of transplants who are protected by IRB review, rather than the organ donors. Therefore, claims about compliance with the Declaration of Helsinki are largely irrelevant regarding the use of prisoners' organs in research. Few papers (14%) include any information about the identity of organ sources. Only half of these explicitly state that no organs were procured from executed prisoners, but many of these claims are incompatible with what is known about volunteer organ sources in China.

Our findings raise significant issues. First, there is the broad question of what to do about the large body of literature based on research using organs from prisoners. It can be argued that prior to 2006, the international transplant community was not aware that in China at the time, all transplants were procured from executed prisoners. However, post-2006 and the publication of TTS policy, professional claims of ignorance are hard to support. This lack of vigilance on the part of reviewers, editors and publishers is morally concerning, given the large numbers of papers (over 85%) accepted for publication with no information at all on the source of organs, especially where individual journals have explicitly adopted relevant policy (*Transplantation, American Journal of Transplantation*).

1  
2  
3 Continued use of this research raises potential issues of complicity[112] to the extent that the  
4 international community (including members of TTS, journal editors, and peer-reviewers)  
5 condemn the use of executed prisoners' organs in research, but nonetheless benefit from this  
6 practice by allowing or facilitating the publication of such research, and subsequently using  
7 the findings. The obligations of third parties to avoid complicity depend in part on the  
8 magnitude of the moral wrong in question.[113] Some research uses of datasets that were  
9 obtained illicitly may be permissible.[114] By comparison, there is broad consensus that it is  
10 unethical to make use of the data obtained from Nazi and Japanese medical experiments  
11 where the victims were killed or harmed in the course of the research.[115–117] The use of  
12 research based on organs sourced from executed Chinese prisoners, many of whom are  
13 prisoners of conscience,[21,118] falls at the severe end of this spectrum of moral wrongs in  
14 research. The obligation of third parties, such as peer-reviewers, publishers, and editors to  
15 avoid complicity is therefore comparatively high in this case, warranting large scale  
16 retractions and investigation of the 340 papers that are based exclusively or partially on data  
17 from executed prisoners (i.e. all papers reporting on transplants that occurred prior to 2010 or  
18 spanning 2010: see Table 7). In addition, due to lack of vigilance by the journals on reporting  
19 organ sources, readers risk witting or unwitting complicity to the extent that they use the  
20 published research findings. Finally, the continued presence of these papers in the literature  
21 creates moral hazard as it demonstrates that breaches of ethical standards in research will be  
22 ignored or tolerated, thereby removing incentives for future compliance with these standards.  
23  
24 Second, journal editors must decide how to handle published papers that not only use data  
25 from executed prisoners, but make almost certainly false claims about procuring organs from  
26 non-prisoner sources. In 29 of the 63 papers claiming or implying that organs were from non-  
27 prisoner sources and/or donated voluntarily or with consent, the claims are incompatible with  
28 what is known about voluntary donations across China in the relevant time period. There is  
29  
30  
31  
32  
33  
34  
35  
36  
37  
38  
39  
40  
41  
42  
43  
44  
45  
46  
47  
48  
49  
50  
51  
52  
53  
54  
55  
56  
57  
58  
59  
60

1  
2  
3 less certainty regarding the falsity of claims in published papers reporting on transplants that  
4 took place between 2010-2014 given the existence of a pilot voluntary donation scheme.

5  
6 Determining the likely veracity of these claims requires sustained investigation, including of  
7 Chinese language sources. Such investigation is possible, and has formed the basis for a  
8 retraction of a paper that falsely claimed more organs were procured from volunteers than  
9 there were reported volunteers at the relevant hospital.[119–121] This is to date the only  
10 retraction in the literature. At the very least however, reviewers, editors and journals should  
11 be aware that prior to 2010 there were almost no voluntary donors, and that the alleged  
12 numbers of volunteer donors during the 2010-2014 pilot scheme were low (see Table 5).  
13 Given this situation, claims about volunteer sources for transplantation during these periods  
14 warrant scrutiny, with rejection of papers and author bans if adequate evidence of ethical  
15 organ sourcing is not provided.  
16  
17

18  
19 Third, there is a pressing need for further reviews of the literature excluded in this study. In  
20 particular, we need review of Chinese language sources and English language publications in  
21 China where a further large body of unethical research may be published, as well as review of  
22 papers published in languages other than English and Chinese. A future review of kidney  
23 transplant papers is also required, to fully document the extent of published unethical  
24 research.  
25  
26

27  
28 Finally, there is a question regarding future publication of Chinese transplant papers. In our  
29 view, it is unacceptable to publish any papers that are highly likely to contain data derived  
30 from use of prisoners' organs. This includes data from transplants up until the end of 2014,  
31 given the difficulty of establishing organ provenance and the demonstrated lack of veracity in  
32 the claims of at least some authors. However, even transplants post-2015 may involve  
33 prisoners' organs.[19] For this reason, we suggest an interim moratorium on publication of all  
34 relevant papers, pending an international summit to develop policy. A summit involving  
35  
36  
37  
38  
39  
40  
41  
42  
43  
44  
45  
46  
47  
48  
49  
50  
51  
52  
53  
54  
55  
56  
57  
58  
59  
60

1  
2  
3 representatives from the International Committee of Medical Journal Editors, Committee on  
4 Publication Ethics, The Transplantation Society and members of other relevant national and  
5 international transplant societies, together with China human rights experts, ethicists and any  
6 other relevant stakeholders could and should develop policy on handling future research. One  
7 outcome of this process could be the development of a checklist tool for all transplant papers,  
8 itemising mandatory information about organ sources. Given our lack of capacity in this  
9 study to report on papers involving kidney transplants due to missing information about the  
10 status of organ sources, one requirement of a checklist should be an unambiguous statement  
11 regarding whether organ sources were living or deceased. An international and widely  
12 adopted process of this kind would provide a strong incentive for China to move more rapidly  
13 towards an organ donation system that is ethical, transparent and verifiable. This incentive is  
14 currently lacking given the widespread publication of unethical research.  
15  
16  
17  
18  
19  
20  
21  
22  
23  
24  
25  
26  
27  
28  
29  
30

### 31 **Limitations**

32  
33 The strengths of the study lie in its originality and robust methods. These give confidence that  
34 the results are reliable and likely to be conservative (given reasonable assumptions as  
35 described in the Methods) rather than to overestimate the findings. However, there are  
36 potential limitations. First, scoping reviews are less comprehensive than systematic reviews,  
37 making it possible that relevant papers were not identified and included. Second, we had to  
38 change our approach to data collection during the study, as the quality of data in the papers  
39 was so poor. This affected the study in two ways. We were not able to report on research  
40 involving kidney transplants due to lack of information as to whether sources were living or  
41 deceased; and we were not able to report on whether organs were obtained after death  
42 declared on cardiac or brain criteria as this information was poorly and inconsistently  
43 reported. Third, unless stated otherwise in the papers reporting on liver transplants, we have  
44  
45  
46  
47  
48  
49  
50  
51  
52  
53  
54  
55  
56  
57  
58  
59  
60

1  
2  
3 assumed the donors were deceased. It is possible that some of the transplants classified as  
4  
5 deceased donor were from living split liver transplants, however we think the number is  
6  
7 likely to be very low as deceased sourcing is the commonest type of transplant and numbers  
8  
9 of living liver donations in China are low, at 7.37% of total cumulative liver transplants as of  
10  
11 end 2011, according to official data.[122] Fourth, we have reported on published literature,  
12  
13 but during the period when only organs from executed prisoners were available, the  
14  
15 pharmaceutical industry ran clinical trials on immunosuppressants for transplantation in  
16  
17 China (including after 2007 when TTS policy was promulgated).[123] Unpublished industry  
18  
19 trials have not been included in our study. Finally, we have reported the total number of  
20  
21 participants (and hence number of transplants) in the included studies, but this number is  
22  
23 likely to be inflated by multiple publication of the same and overlapping research cohorts.  
24  
25 However, as our aim was to report on whether or not published research met the ethical  
26  
27 reporting standards mandated by The Transplantation Society, we do not think this is a  
28  
29 critical issue.  
30  
31  
32  
33  
34

## 35 **Conclusion**

36  
37 The transplant community has failed to implement ethical standards banning publication of  
38  
39 research using material from executed prisoners. As a result, a large body of unethical  
40  
41 published research now exists, raising questions of complicity to the extent that the transplant  
42  
43 community uses and benefits from the results of this research. Our study has identified the  
44  
45 extent of this problem as well as specific papers containing demonstrably false claims about  
46  
47 organ sourcing. There has been a significant lack of vigilance and failure to adhere to  
48  
49 accepted ethical standards by reviewers, editors and publishers. Researchers and clinicians  
50  
51 who use this body of research risk complicity by implicitly accepting Chinese methods of  
52  
53 organ procurement. We call for immediate retraction of all papers reporting research based on  
54  
55  
56  
57  
58  
59  
60

1  
2  
3 use of organs from executed prisoners, and an international summit to develop future policy  
4  
5 for handling Chinese transplant research.  
6  
7  
8  
9  
10  
11  
12  
13  
14  
15  
16  
17  
18  
19  
20  
21  
22  
23  
24  
25  
26  
27  
28  
29  
30  
31  
32  
33  
34  
35  
36  
37  
38  
39  
40  
41  
42  
43  
44  
45  
46  
47  
48  
49  
50  
51  
52  
53  
54  
55  
56  
57  
58  
59  
60

For peer review only

## Statements and Declarations

### Author contributions

All authors (WAR, MPR, AB, BB, RC, RCW, MFS) contributed substantially to the conception and design of the work and to the analysis and interpretation of the data. All authors contributed to revisions and approved the final draft. All authors agree to be accountable for all aspects of the work in ensuring that any questions related to the accuracy or integrity of any part of the work are appropriately investigated and resolved.

Specific individual contributions in addition to the above:

WAR led the drafting of the paper and contributed to data extraction.

MPR contributed to literature searching and data extraction.

AB contributed to literature searching and drafting sections of the manuscript.

BB contributed to data extraction and preparation of figures and tables.

RC contributed to data extraction.

RCW contributed to resolving data extraction outcomes.

MFS contributed to the Introduction.

The lead author (Wendy Rogers, the manuscript's guarantor) affirms that the manuscript is an honest, accurate, and transparent account of the study being reported. No important aspects of the study have been omitted; and that any discrepancies from the study as planned (and, if relevant, registered) have been explained.

### Competing interests disclosures

Dr. Ballantyne is a member of the New Zealand Advocacy & Initiatives Committee (NZAIC) of the International Coalition to End Transplant Abuse in China.

Dr. Blakely has nothing to disclose.

Dr. Catsanos has nothing to disclose.



1  
2  
3 Dr. Clay-Williams is a member of the Australian Advocacy and Initiatives Committee of the  
4  
5 International Coalition to End Transplant Abuse in China.  
6

7 Prof Fiatarone Singh is a member of the Ethics Committee of Doctors Against Forced Organ  
8  
9 Harvesting, and a member of the Australian Advocacy and Initiatives Committee of the  
10  
11 International Coalition to End Transplant Abuse in China.  
12

13 Mr. Robertson reports that he is an occasional expert contributor to the International  
14  
15 Coalition to End Transplant Abuse in China.  
16

17 Prof Rogers is a Director of the NGO “International Coalition to End Transplant Abuse in  
18  
19 China” and is chair of its International Advisory Committee.  
20  
21  
22  
23

#### 24 **Ethics approval**

25  
26 No ethics committee approval was required as this study did not involve any patient data.  
27  
28  
29  
30

#### 31 **Clinical trial registration**

32  
33 This study is a scoping review therefore was not registered as a clinical trial.  
34  
35  
36  
37

#### 38 **Funding**

39  
40 This research received no specific grant from any funding agency in the public, commercial  
41  
42 or not-for-profit sectors.  
43  
44  
45

#### 46 **Data sharing**

47  
48 The full list of 445 included studies is published in Supplementary File 3.  
49  
50  
51  
52  
53  
54  
55  
56  
57  
58  
59  
60

1  
2  
3 **Figure legends**  
4

5  
6 Figure 1. PRISMA flow chart detailing search strategy  
7

8 Figure 2. Articles per year with and without ethics statements  
9

10 Figure 3. Articles per year with and without organ source ID  
11  
12  
13  
14  
15  
16  
17  
18  
19  
20  
21  
22  
23  
24  
25  
26  
27  
28  
29  
30  
31  
32  
33  
34  
35  
36  
37  
38  
39  
40  
41  
42  
43  
44  
45  
46  
47  
48  
49  
50  
51  
52  
53  
54  
55  
56  
57  
58  
59  
60

For peer review only

**List of Supplementary Files**

Supplementary File 1. Search strategies

Supplementary File 2. Details extracted from included studies

Supplementary File 3. Full list of 445 studies, bibliographic details

Supplementary File 4. Results table

Supplementary File 5. Bibliographic details of 63 studies containing some information regarding identity of and/or consent by donors

Supplementary File 6: Full list of journals publishing papers included in the study and number of papers per journal

## References

- 1 World Health Organization. WHO guiding principles on human cell, tissue and organ transplantation. *Transplantation* 2010;90:229–33.
- 2 WMA - The World Medical Association-WMA Statement on Organ and Tissue Donation. <https://www.wma.net/policies-post/wma-statement-on-organ-and-tissue-donation/> (accessed 7 Feb 2018).
- 3 Stock P. Policy and Ethics. The Transplantation Society. <https://www.tts.org/about-tts-5/governance/policy-a-ethics> (accessed 7 Feb 2018).
- 4 Amnesty International. Amnesty International Report 2011: The State of the World's Human Rights. Amnesty International Publications 2011.
- 5 The Declaration of Istanbul on Organ Trafficking and Transplant Tourism. The Declaration of Istanbul Custodian Group. <http://www.declarationofistanbul.org/> (accessed 7 Feb 2018).
- 6 Tibell A. The Transplantation Society's policy on interactions with China. *Transplantation* 2007;84:292–4.
- 7 The Transplantation Society. The Transplantation Society's principles for interacting with China. 2006. <https://www.tts.org/images/stories/pdfs/StatementMembs-ChineseTXProg.pdf>
- 8 Caplan AL, Danovitch G, Shapiro M, et al. Time for a boycott of Chinese science and medicine pertaining to organ transplantation. *Lancet* 2011;378:1218.
- 9 Lavee J, West LJ. A call for a policy change regarding publications based on transplantation of organs from executed prisoners. *J Heart Lung Transplant* 2012;31:555–6.
- 10 Danovitch GM, Shapiro ME, Lavee J. The Use of Executed Prisoners as a Source of Organ Transplants in China Must Stop. *Am J Transplant* 2011;11:426–8.
- 11 Caplan AL, Rockman HA, Turka LA. Editorial position on publishing articles on human organ transplantation. *J Clin Invest* 2012;122:2.
- 12 Smith CS. Doctor Says He Took Transplant Organs From Executed Chinese Prisoners. *The New York Times*. 2001. <https://www.nytimes.com/2001/06/29/world/doctor-says-he-took-transplant-organs-from-executed-chinese-prisoners.html> (accessed 17 Feb 2018).
- 13 Huang J. Ethical and legislative perspectives on liver transplantation in the People's Republic of China. *Liver Transpl* 2007;13:193–6.
- 14 BBC News - China admits death row organ use. BBC. <http://news.bbc.co.uk/2/hi/8222732.stm> (accessed 7 Feb 2018).
- 15 Wang H. New era for organ donation and transplant in China. Interview by Fiona Fleck. *Bull World Health Organ* 2012;90:802–3.

- 1  
2  
3 16 Zhao H, Wu N. 专访黄洁夫:中国器官移植事业光明正大地登上世界舞台  
4 [Exclusive Interview with Huang Jiefu: The China Organ  
5 Transplant Field Justly and Honorably Steps Onto the World  
6 Stage]. *China Healthcare*. 2015.<https://perma.cc/X73M-HNRX>  
7 (accessed 23 Mar 2018).  
8  
9
- 10 17 Huang J-F, Zheng S-S, Liu Y-F, et al. China organ donation and transplantation update:  
11 the Hangzhou Resolution. *Hepatobiliary Pancreat Dis Int* 2014;13:122–4.  
12
- 13 18 Paul NW, Caplan A, Shapiro ME, et al. Human rights violations in organ procurement  
14 practice in China. *BMC Med Ethics* 2017;18:11.  
15
- 16 19 Kirchgaessner S. China may still be using executed prisoners' organs, official admits.  
17 *The Guardian*. 2017.[http://www.theguardian.com/world/2017/feb/07/china-still-using-](http://www.theguardian.com/world/2017/feb/07/china-still-using-executed-prisoners-organs-transplants-vatican)  
18 [executed-prisoners-organs-transplants-vatican](http://www.theguardian.com/world/2017/feb/07/china-still-using-executed-prisoners-organs-transplants-vatican) (accessed 21 Mar 2018).  
19
- 20 20 Caplan A. The use of prisoners as sources of organs—an ethically dubious practice. *Am J*  
21 *Bioeth* 2011;11:1–5.  
22
- 23 21 Matas D, Kilgour D. *Bloody Harvest: the killing of Falun Gong for their organs*.  
24 Woodstock, ON: : Seraphim Editions 2009.  
25
- 26 22 United States. Congressional-Executive Commission on China. *Falun Gong in China:*  
27 *Review and Update: Hearing Before the Congressional-Executive Commission on*  
28 *China, One Hundred Twelfth Congress, Second Session, December 18, 2012*. U.S.  
29 Government Printing Office 2013.  
30
- 31 23 Levac D, Colquhoun H, O'Brien KK. Scoping studies: advancing the methodology.  
32 *Implement Sci* 2010;5:69.  
33
- 34 24 Arksey H, O'Malley L. Scoping studies: towards a methodological framework. *Int J Soc*  
35 *Res Methodol* 2005;8:19–32.  
36
- 37 25 Xie W, Ye Q, Wan Q. A comparison of risk factors for septic shock in renal transplant  
38 recipients with liver transplant recipients with bloodstream infections. *Exp Clin Cardiol*  
39 2014;20:3587–97.  
40
- 41 26 Ye Q, Ma Y, Wan Q, et al. The distribution and resistance of pathogens causing blood  
42 stream infections following liver transplantation: A clinical analysis of 69 patients.  
43 *Hepatogastroenterology* 2014;61:2311–4.  
44
- 45 27 Zhu L, Liao S, Wang N, et al. Dose regimens for Chinese adult liver transplant  
46 recipients according to the genetic polymorphisms of CYP2C9, CYP2C19, and CYP3A5  
47 in recipients and donors. *Int J Clin Pharmacol Ther* 2016;54:587–96.  
48
- 49 28 Nie X, Wan Q, Ye Q, et al. Fungemias following liver or kidney transplantation: A  
50 clinical analysis of 17 patients. *J Pure Appl Microbiol* 2014;8:667–70.  
51
- 52 29 Tsai HI, Tsai YF, Yu HP. Arterial waveform monitoring during liver transplantation.  
53 *Exp Clin Cardiol* 2014;20:145–57.  
54  
55  
56  
57  
58  
59

- 1  
2  
3 30 Yang X, Lu Q, Tang T, et al. Prediction of the prognosis after liver transplantation in  
4 severe hepatitis B-induced liver failure and clinical decision for liver transplantation. *J*  
5 *Surg Res* 2013;183:846–51.  
6  
7 31 Mu H-J, Xie P, Chen J-Y, et al. Association of TNF- $\alpha$ , TGF- $\beta$ 1, IL-10, IL-6, and IFN- $\gamma$   
8 gene polymorphism with acute rejection and infection in lung transplant recipients. *Clin*  
9 *Transplant* 2014;28:1016–24.  
10  
11 32 Hu W-Y, Wu L-Q, Su Z, et al. Expression of human leukocyte antigen-G and acute  
12 rejection in patients following liver transplantation. *Exp Ther Med* 2014;8:1291–5.  
13  
14 33 黄洁夫：内地已有38家医院停用死囚器官 [Huang Jiefu: 38 Hospitals in  
15 China Have Already Stopped Using Organs From Prisoners].  
16 *Beijing Times*.  
17 2014.<http://npc.people.com.cn/n/2014/0307/c376899-24566378.html>  
18 (accessed 23 Mar 2018).  
19  
20  
21 34 Guo C-B, Li Y-C, Zhang M-M, et al. Early postoperative care of liver transplantation for  
22 infants with biliary atresia during pediatric intensive care unit stay. *Transplant Proc*  
23 2010;42:1750–4.  
24  
25 35 Lei J, Yan L. Outcome comparisons among the Hangzhou, Chengdu, and UCSF criteria  
26 for hepatocellular carcinoma liver transplantation after successful downstaging  
27 therapies. *J Gastrointest Surg* 2013;17:1116–22.  
28  
29 36 Chen YB, Li SD, Ju BL, et al. Suitable calcineurin inhibitor concentrations for liver  
30 transplant recipients in the Chinese population. *Transplant Proc* 2011;43:1751–3.  
31  
32 37 Chu Z, Zhang J, Zhao Y, et al. Influence of immunosuppressive drugs on the  
33 development of CD4<sup>+</sup>CD25<sup>high</sup>Foxp3<sup>+</sup> T cells in liver transplant recipients.  
34 *Transplant Proc* 2010;42:2599–601.  
35  
36 38 Gu L, Yu YC. Clinical outcome of dental implants placed in liver transplant recipients  
37 after 3 years: A case series. *Transplant Proc* 2011;43:2678–82.  
38  
39 39 Lei JY, Wang WT, Yan LN. Hangzhou criteria for liver transplantation in hepatocellular  
40 carcinoma: A single-center experience. *Eur J Gastroenterol Hepatol* 2014;26:200–4.  
41  
42 40 Li J, Liu B, Yan LN, et al. Reversal of graft steatosis after liver transplantation:  
43 prospective study. *Transplant Proc* 2009;41:3560–3.  
44  
45 41 Ling Q, Xie H, Lu D, et al. Association between donor and recipient TCF7L2 gene  
46 polymorphisms and the risk of new-onset diabetes mellitus after liver transplantation in  
47 a Han Chinese population. *J Hepatol* 2013;58:271–7.  
48  
49 42 Ling Q, Xu X, Wang K, et al. Donor PPAR $\alpha$  gene polymorphisms influence the  
50 susceptibility to glucose and lipid disorders in liver transplant recipients. *Medicine*  
51 2015;94:e1421.  
52  
53 43 Lu D, Xu X, Wang J, et al. The influence of a contemporaneous portal and hepatic artery  
54 revascularization protocol on biliary complications after liver transplantation. *Surgery*  
55  
56  
57  
58  
59  
60

- 2014;155:190–5.
- 44 Pan C, Shi Y, Zhang JJ, et al. Single-center experience of 253 portal vein thrombosis patients undergoing liver transplantation in China. *Transplant Proc* 2009;41:3761–5.
- 45 Wang SY, Tang HM, Chen GQ, et al. Effect of ursodeoxycholic acid administration after liver transplantation on serum liver tests and biliary complications: A randomized clinical trial. *Digestion* 2012;86:208–17.
- 46 Wang Y, Liu Y, Han R, et al. Monitoring of CD95 and CD38 expression in peripheral blood T lymphocytes during active human cytomegalovirus infection after orthotopic liver transplantation. *J Gastroenterol Hepatol* 2010;25:138–42.
- 47 Xiao L, Fu ZR, Ding GS, et al. Prediction of survival after liver transplantation for chronic severe hepatitis b based on preoperative prognostic scores: A single center's experience in China. *World J Surg* 2009;33:2420–6.
- 48 Xu J, Shen ZY, Chen XG, et al. A randomized controlled trial of Licartin for preventing hepatoma recurrence after liver transplantation. *Hepatology* 2007;45:269–76.
- 49 Xu X, Guo HJ, Xie HY, et al. ZIP4, a novel determinant of tumor invasion in hepatocellular carcinoma, contributes to tumor recurrence after liver transplantation. *Int J Biol Sci* 2014;10:245–56.
- 50 Liu X, Ling Q, Wei Q, et al. Artificial liver support system combined with liver transplantation in the treatment of patients with acute-on-chronic liver failure. *PLoS One* 2013;8 (3).
- 51 Xu X, Tu Z, Wang B, et al. A novel model for evaluating the risk of hepatitis B recurrence after liver transplantation. *Liver Int* 2011;31:1477–84.
- 52 Xue F, Higgs BW, Huang J, et al. HERC5 is a prognostic biomarker for post-liver transplant recurrent human hepatocellular carcinoma. *J Transl Med* 2015;13. doi:10.1186/s12967-015-0743-2
- 53 Zhu M, Li Y, Xia Q, et al. Strong impact of acute kidney injury on survival after liver transplantation. *Transplant Proc* 2010;42:3634–8.
- 54 Chen J, Wang Y, Shen Z, et al. Early diagnostic value of plasma PCT and BG assay for CRBSI after OLT. *Transplant Proc* 2011;43:1777–9.
- 55 Fan X, Chen Z, Nasralla D, et al. The organ preservation and enhancement of donation success ratio effect of extracorporeal membrane oxygenation in circulatory unstable brain death donor. *Clin Transplant* 2016;30:1306–13.
- 56 Ling Q, Xie H, Li J, et al. Donor graft MicroRNAs: a newly identified player in the development of new-onset diabetes after liver transplantation. *Am J Transplant* 2017;17:255–64.
- 57 Liu C, Tsai HL, Chin T, et al. Experience of surgical treatment for hepatoblastoma. *Formosan Journal of Surgery* 2016;49:56–62.

- 1  
2  
3 58 Wang Y, Shen Z, Zhu Z, et al. Clinical values of AFP, GPC3 mRNA in peripheral blood  
4 for prediction of hepatocellular carcinoma recurrence following OLT. *Hepat Mon*  
5 2011;11:195–9.  
6  
7 59 Xu X, Ling Q, Wang J, et al. Donor miR-196a-2 polymorphism is associated with  
8 hepatocellular carcinoma recurrence after liver transplantation in a Han Chinese  
9 population. *International Journal of Cancer* 2016;138:620–9.  
10  
11 60 Yu Z, Sun Z, Yu S, et al. Safety limitations of fatty liver transplantation can be extended  
12 to 40%: Experience of a single centre in China. *Liver Int* Published Online First: 2016.  
13  
14 61 Zhang M, Yin F, Chen B, et al. Pretransplant prediction of posttransplant survival for  
15 liver recipients with benign end-stage liver diseases: A nonlinear model. *PLoS One*  
16 2012;7 (3).  
17  
18 62 Zhong L, Li H, Li Z, et al. C7 genotype of the donor may predict early bacterial  
19 infection after liver transplantation. *Sci Rep* 2016;6:24121.  
20  
21 63 Jiang L, Lei JY, Wang WT, et al. Immediate radical therapy or conservative treatments  
22 when meeting the Milan criteria for advanced HCC patients after successful TACE. *J*  
23 *Gastrointest Surg* 2014;18:1125–30.  
24  
25 64 Yu S, Yu J, Zhang W, et al. Safe use of liver grafts from hepatitis B surface antigen  
26 positive donors in liver transplantation. *J Hepatol* 2014;61:809–15.  
27  
28 65 Lee WC, Lee CS, Wang YC, et al. Validation of the model for end-stage liver disease  
29 score criteria in urgent liver transplantation for acute flare up of Hepatitis B. *Medicine*  
30 2016;95 (22).  
31  
32 66 中国模式+广州贡献'获国际器官捐献与移植学界点赞 ['China model +  
33 **Guangzhou donations' are praised by international organ**  
34 **donation and transplantation community]. China Organ**  
35 **Transplantation Development Foundation.**  
36 **2017.**[http://news.dayoo.com/guangzhou/201712/16/139995\\_51994682](http://news.dayoo.com/guangzhou/201712/16/139995_51994682.htm)  
37 **.htm (accessed 30 Mar 2018).**  
38  
39  
40  
41 67 Li MR, Chen GH, Cai CJ, et al. High hepatitis B virus DNA level in serum before liver  
42 transplantation increases the risk of hepatocellular carcinoma recurrence. *Digestion*  
43 2011;84:134–41.  
44  
45 68 Ling Q, Xu X, Li J, et al. A new serum cystatin C-based equation for assessing  
46 glomerular filtration rate in liver transplantation. *Clin Chem Lab Med* 2008;46:405–10.  
47  
48 69 Pan C, Wang C, Pan W, et al. Usefulness of real-time three-dimensional  
49 echocardiography to quantify global left ventricular function and mechanical  
50 dyssynchrony after heart transplantation. *Acta Cardiol* 2011;66:365–70.  
51  
52 70 Wang W, Ye Y, Wang T, et al. Prognostic prediction of male recipients selected for  
53 liver transplantation: With special attention to neutrophil to lymphocyte ratio. *Hepatol*  
54 *Res* 2016;46:899–907.  
55  
56  
57  
58  
59  
60



- 1  
2  
3 71 Wang Y, Liu Y, Han R, et al. Temporal evolution of soluble Fas and Fas ligand in  
4 patients with orthotopic liver transplantation. *Cytokine* 2008;41:240–3.  
5  
6 72 Xiao M, Xu X, Zhu H, et al. Efficacy and safety of basiliximab in liver transplantation  
7 for patients with hepatitis B virus-related diseases: A single centre study. *Int J Clin Pract*  
8 2015;69:35–42.  
9  
10 73 Xu L, Li X, Xu M, et al. Perioperative use of ECMO during double lung transplantation.  
11 *ASAIO Journal* 2009;55:255–8.  
12  
13 74 Xu X, Ke QH, Shao ZX, et al. The value of serum  $\alpha$ -fetoprotein in predicting tumor  
14 recurrence after liver transplantation for hepatocellular carcinoma. *Dig Dis Sci*  
15 2009;54:385–8.  
16  
17 75 Xu X, Qu K, Wan Y, et al. Tumor existence and tumor size as prognostic factors in  
18 hepatitis B virus-related cirrhosis patients who underwent liver transplantation.  
19 *Transplant Proc* 2014;46:1389–92.  
20  
21 76 Xu ZD, Xu HT, Li WW, et al. Influence of preoperative diastolic dysfunction on  
22 hemodynamics and outcomes of patients undergoing orthotopic liver transplantation. *Int*  
23 *J Clin Exp Med* 2013;6:351–7.  
24  
25 77 Wang Y, Zhang M, Liu ZW, et al. The ratio of circulating regulatory T cells  
26 (Tregs)/Th17 cells is associated with acute allograft rejection in liver transplantation.  
27 *PLoS ONE* 2014;9:e112135.  
28  
29 78 Chen ZY, Yan LN, Zeng Y, et al. Preliminary experience with indications for liver  
30 transplantation for hepatolithiasis. *Transplant Proc* 2008;40:3517–22.  
31  
32 79 Fan J, Yang GS, Fu ZR, et al. Liver transplantation outcomes in 1,078 hepatocellular  
33 carcinoma patients: A multi-center experience in Shanghai, China. *J Cancer Res Clin*  
34 *Oncol* 2009;135:1403–12.  
35  
36 80 Gao Y, Zhang M, Li J, et al. Circulating FoxP3+ regulatory T and interleukin17-  
37 producing Th17 cells actively influence HBV clearance in De Novo Hepatitis B virus  
38 infected patients after orthotopic liver transplantation. *PLoS One* 2015;10.  
39 doi:10.1371/journal.pone.0137881  
40  
41 81 Hu XX, Yan LN. Retrospective analysis of prognostic factors after liver transplantation  
42 for intrahepatic cholangiocarcinoma in China: A single-center experience.  
43 *Hepatogastroenterology* 2011;58:1255–9.  
44  
45 82 Li F, Yang M, Li B, et al. Initial clinical results of orthotopic liver transplantation for  
46 hepatic alveolar echinococcosis. *Liver Transpl* 2007;13:924–6.  
47  
48 83 Li H, He JW, Fu BS, et al. Immunosuppressant-related hip pain after orthotopic liver  
49 transplant. *Exp Clin Transplant* 2013;11:32–8.  
50  
51 84 Zhang D, Jiao Z, Han J, et al. Clinicopathological features of hepatitis B virus  
52 recurrence after liver transplantation: Eleven-year experience. *Int J Clin Exp Pathol*  
53 2014;7:4057–66.  
54  
55  
56  
57  
58  
59

- 1  
2  
3 85 Zhang M, Yin F, Chen B, et al. Mortality risk after liver transplantation in hepatocellular  
4 carcinoma recipients: A nonlinear predictive model. *Surgery* 2012;151:889–97.  
5  
6 86 Zhang Y, Yan L, Wen T, et al. Prophylaxis against hepatitis B virus recurrence after  
7 liver transplantation for hepatitis B virus-related end-stage liver diseases with severe  
8 hypersplenism and splenomegaly: Role of splenectomy. *J Surg Res* 2012;178:478–86.  
9  
10 87 Lei JY, Yan LN, Wang WT, et al. Health-related quality of life and psychological  
11 distress in patients with early-stage hepatocellular carcinoma after hepatic resection or  
12 transplantation. *Transplant Proc* 2016;48:2107–11.  
13  
14 88 Lin B, Geng L, Zheng Z, et al. The predictive value of blood neutrophil-lymphocyte  
15 ratio in patients with end-stage liver cirrhosis following ABO-incompatible liver  
16 transplantation. *J Res Med Sci* 2016;21:20–5.  
17  
18 89 Jiang L, Yan L, Li B, et al. Prophylaxis against hepatitis B recurrence  
19 posttransplantation using lamivudine and individualized low-dose hepatitis B  
20 immunoglobulin. *Am J Transplant* 2010;10:1861–9.  
21  
22 90 Chen Z, Gong R, Luo Y, et al. Surgical procedures for hepatolithiasis.  
23 *Hepatogastroenterology* 2010;57:134–7.  
24  
25 91 Lin XH, Teng S, Wang L, et al. Fatigue and its associated factors in liver transplant  
26 recipients in Beijing: A cross-sectional study. *BMJ Open* 2017;7 (2).  
27  
28 92 Ran JH, Zhang SN, Liu J, et al. In-hospital and follow-up outcomes of patients  
29 undergoing orthotopic liver transplantation after hepatic artery reconstruction with an  
30 iliac interposition graft. *Int J Clin Exp Med* 2016;9:3939–45.  
31  
32 93 Xu X, Ling Q, Gao F, et al. Hepatoprotective effects of marine and kuhuang in liver  
33 transplant recipients. *Am J Chin Med* 2009;37:27–34.  
34  
35 94 Xu X, Ling Q, Zhang M, et al. Outcome of patients with hepatorenal syndrome type 1  
36 after liver transplantation: Hangzhou experience. *Transplantation* 2009;87:1514–9.  
37  
38 95 Zhu XS, Wang SS, Cheng Q, et al. Using ultrasonography to monitor liver blood flow  
39 for liver transplant from donors supported on extracorporeal membrane oxygenation.  
40 *Liver Transpl* 2016;22:188–91.  
41  
42 96 Yuefeng M, Weili F, Wenxiang T, et al. Long-term outcome of patients with lamivudine  
43 after early cessation of hepatitis B immunoglobulin for prevention of recurrent hepatitis  
44 B following liver transplantation. *Clin Transplant* 2011;25:517–22.  
45  
46 97 Liu Y, Liu YY, Li CP, et al. Comprehensive comparison of three different  
47 immunosuppressive regimens for liver transplant patients with hepatocellular carcinoma:  
48 Steroid-free immunosuppression, induction immunosuppression and standard  
49 immunosuppression. *PLoS One* 2015;10 (3).  
50  
51 98 Chen Y, Zhang H, Xiao X, et al. Peripheral blood transcriptome sequencing reveals  
52 rejection-relevant genes in long-term heart transplantation. *Int J Cardiol* 2013;168:2726–  
53 33.  
54  
55  
56  
57  
58  
59  
60

- 1  
2  
3 99 Gao Y, Ren H, Meng F, et al. Pathological roles of interleukin-22 in the development of  
4 recurrent hepatitis C after liver transplantation. *PLoS One* 2016;11.  
5 doi:10.1371/journal.pone.0154419  
6
- 7 100 Gao YJ, Zhang M, Jin B, et al. A clinical-pathological analysis of hepatitis B virus  
8 recurrence after liver transplantation in Chinese patients. *J Gastroenterol Hepatol*  
9 2014;29:554–60.  
10
- 11 101 Li H, Li J, Wang Y, et al. Proteomic analysis of effluents from perfused human heart for  
12 transplantation: Identification of potential biomarkers for ischemic heart damage.  
13 *Proteome Sci* 2012;10. doi:10.1186/1477-5956-10-21  
14
- 15 102 Li WX, Li Z, Gao PJ, et al. Histological differentiation predicts post-liver  
16 transplantation survival time. *Clin Res Hepatol Gastroenterol* 2014;38:201–8.  
17
- 18 103 Sun XY, Dong JH, Qin K, et al. Single center study on transplantation of livers donated  
19 after cardiac death: A report of 6 cases. *Exp Ther Med* 2016;11:988–92.  
20
- 21 104 Zhu XS, Gao YH, Wang SS, et al. Contrast-enhanced ultrasound diagnosis of splenic  
22 artery steal syndrome after orthotopic liver transplantation. *Liver Transpl* 2012;18:966–  
23 71.  
24
- 25 105 Liu S, Bai Y, Huang J, et al. Do mitochondria contribute to left ventricular non-  
26 compaction cardiomyopathy? New findings from myocardium of patients with left  
27 ventricular non-compaction cardiomyopathy. *Mol Genet Metab* 2013;109:100–6.  
28
- 29 106 Liu X, Wang B, Zhang X, et al. Liver Transplantation using donation after brain and  
30 cardiac death: a single-center experience in China. *Transplant Proc* 2016;48:1879–86.  
31
- 32 107 Yuan X, Chen C, Zhou J, et al. Organ donation and transplantation from donors with  
33 systemic infection: a single-center experience. *Transplant Proc* 2016;48:2454–7.  
34
- 35 108 Liang TB, Li DL, Liang L, et al. Intraoperative blood salvage during liver  
36 transplantation in patients with hepatocellular carcinoma: Efficiency of leukocyte  
37 depletion filters in the removal of tumor cells. *Transplantation* 2008;85:863–9.  
38
- 39 109 Zheng S-S, Xu X, Wu J, et al. Liver transplantation for hepatocellular carcinoma:  
40 Hangzhou experiences. *Transplantation* 2008;85:1726–32.  
41
- 42 110 Xie SB, Zhu JY, Ying Z, et al. Prevention and risk factors of the HBV recurrence after  
43 orthotopic liver transplantation: 160 cases follow-up study. *Transplantation*  
44 2010;90:786–90.  
45
- 46 111 Xue F, Zhang J, Han L, et al. Immune cell functional assay in monitoring of adult liver  
47 transplantation recipients with infection. *Transplantation* 2010;89:620–6.  
48
- 49 112 Cohen GA. Casting the first stone: who can, and who can't, condemn the terrorists?  
50 *Royal Institute of Philosophy Supplements* 2006;58:113–36.  
51
- 52 113 Hickey D, Li SS, Morrison C, et al. Unit 731 and moral repair. *J Med Ethics*  
53 2017;43:270–6.  
54  
55  
56  
57  
58  
59

- 1  
2  
3 114 Thomas DR, Pastrana S, Hutchings A, et al. Ethical issues in research using datasets of  
4 illicit origin. In: Proceedings of the 2017 Internet Measurement Conference. ACM 2017.  
5 445–62.  
6  
7 115 Green RM. Benefiting from ‘evil’: an incipient moral problem in human stem cell  
8 research. *Bioethics* 2002;16:544–56.  
9  
10 116 Is it Ethical to Use Data from Nazi Medical Experiments? ABC News.  
11 2015.<http://www.abc.net.au/religion/articles/2015/06/11/4253136.htm> (accessed 30 Mar  
12 2018).  
13  
14 117 Bärnighausen T. Barbaric Research, Japanese Human Experiments in Occupied China :  
15 Relevance, Alternatives, Ethics. In: Eckart WU, ed. *Man, Medicine, and the State: The*  
16 *Human Body As an Object of Government Sponsored Medical Research in the 20th*  
17 *Century*. Steiner 2006.  
18  
19 118 Gutmann E. *The slaughter: mass killings, organ harvesting, and China’s secret solution*  
20 *to its dissident problem*. Prometheus Books Amherst 2014.  
21  
22 119 Retraction: ‘Safety limitations of fatty liver transplantation can be extended to 40%:  
23 Experience of a single centre in China’, by Yu Z., Yu S., Zhang L., Feng X., Zhang M.,  
24 et al. *Liver Int* 2017;37:767.  
25  
26 120 Rogers WA, Fiatarone Singh MA, Lavee J. Papers based on data concerning organs  
27 from executed prisoners should not be published. *Liver Int* 2017;37:769.  
28  
29 121 Rogers WA, Fiatarone Singh MA, Lavee J. Papers based on data concerning organs  
30 from executed prisoners should not be published: Response to Zheng and Yan. *Liver Int*  
31 2017;37:771–2.  
32  
33 122 Jiang WS, Zhou ZY et. al. *China Liver Transplant Registry Annual Report 2011*. China  
34 Liver Transplant Registry 2011.  
35  
36 123 Schwarz A. Responsibilities of international pharmaceutical companies in the abusive  
37 Chinese organ transplant system. In: Matas D, Trey T, eds. *State Organs: Transplant*  
38 *Abuse in China*. Woodstock, Ontario: : Seraphim Publishers 2012. 119–35.  
39  
40  
41  
42  
43  
44  
45  
46  
47  
48  
49  
50  
51  
52  
53  
54  
55  
56  
57  
58  
59  
60

1  
2  
3  
4  
5  
6  
7  
8  
9  
10  
11  
12  
13  
14  
15  
16  
17  
18  
19  
20  
21  
22  
23  
24  
25  
26  
27  
28  
29  
30  
31  
32  
33  
34  
35  
36  
37  
38  
39  
40  
41  
42  
43  
44  
45  
46  
47  
48  
49  
50  
51  
52  
53  
54  
55  
56  
57  
58  
59  
60

**PRISMA 2009 Flow Diagram**

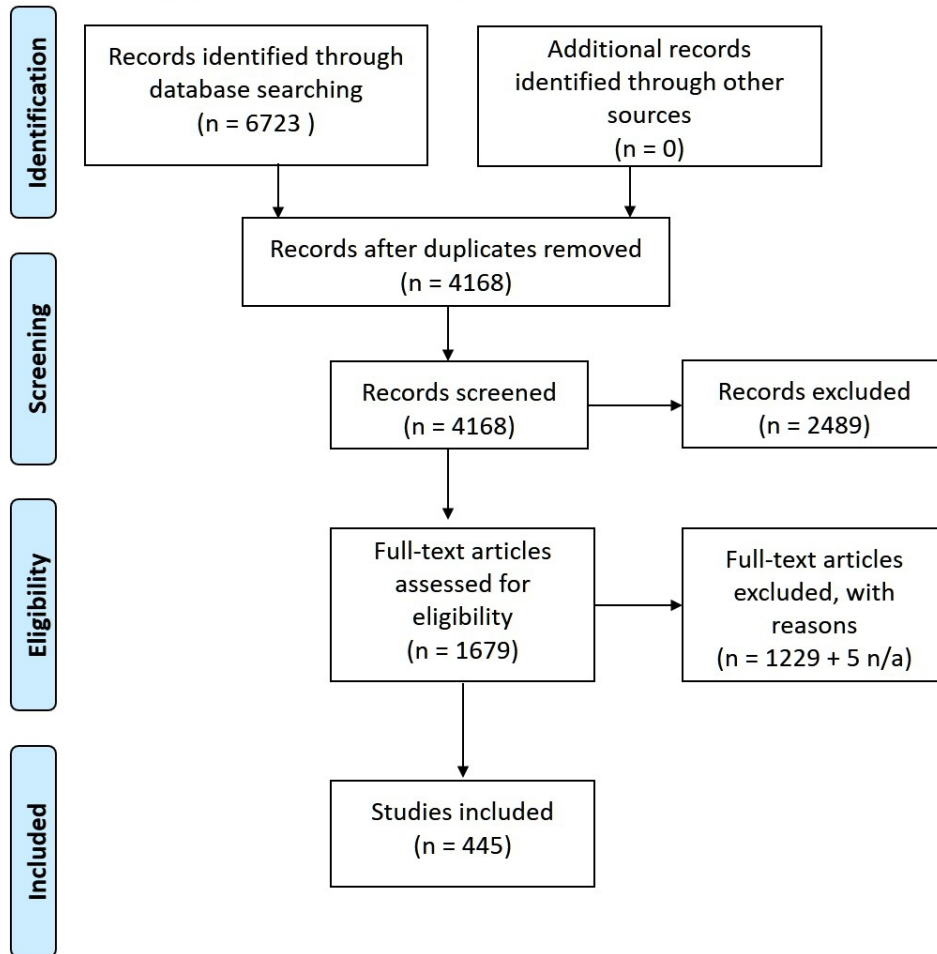

Figure 1: PRISMA flow chart detailing search strategy

180x183mm (150 x 150 DPI)

1  
2  
3  
4  
5  
6  
7  
8  
9  
10  
11  
12  
13  
14  
15  
16  
17  
18  
19  
20  
21  
22  
23  
24  
25  
26  
27  
28  
29  
30  
31  
32  
33  
34  
35  
36  
37  
38  
39  
40  
41  
42  
43  
44  
45  
46  
47  
48  
49  
50  
51  
52  
53  
54  
55  
56  
57  
58  
59  
60

### Articles per year with and without ethics statements

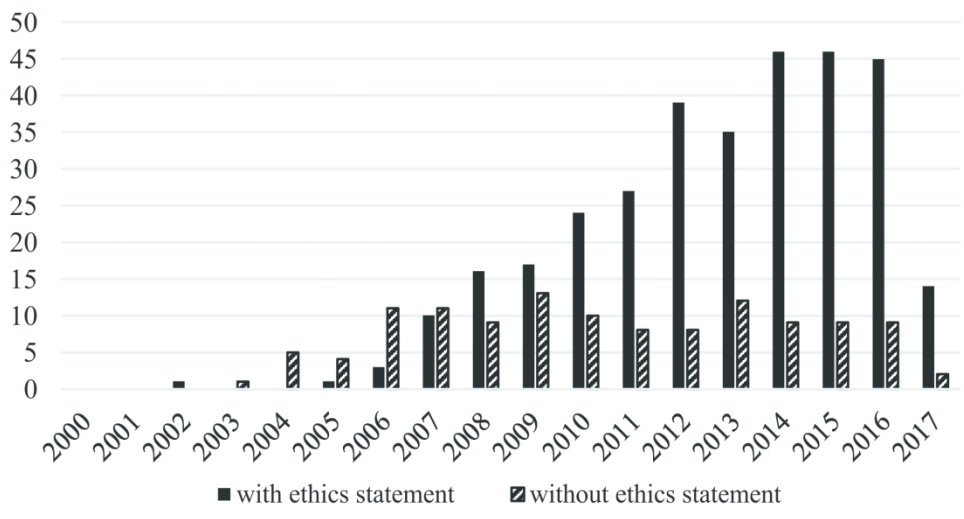

Articles per year with and without ethics statements

175x105mm (300 x 300 DPI)

Articles per year with and without organ source ID information

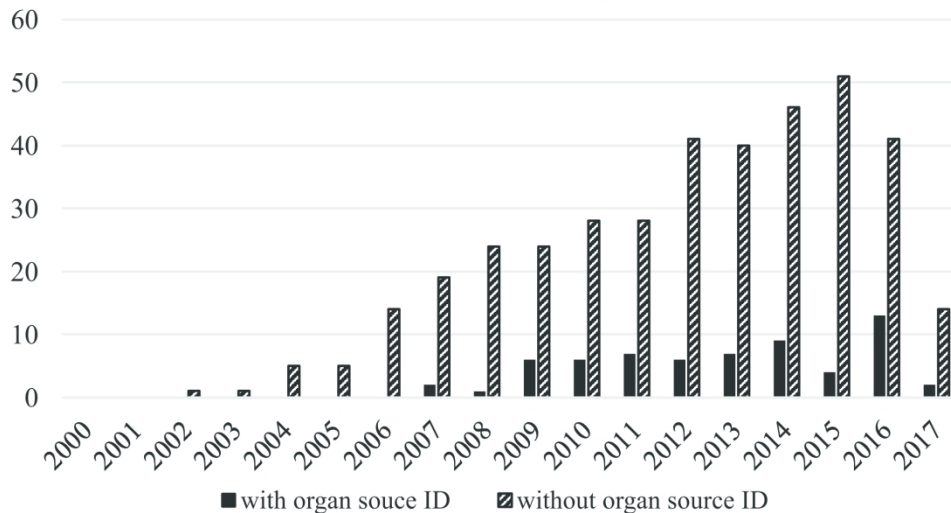

Articles per year with and without organ source ID information

194x117mm (300 x 300 DPI)

### Supplementary File1: Search strategies

All searches run on 5 April 2017

| <b>Medline®</b>                                                                                                                                                                                                                                                                                                                                                                                                                     |                                                                  | <b>Results<br/>:<br/>1702</b> |
|-------------------------------------------------------------------------------------------------------------------------------------------------------------------------------------------------------------------------------------------------------------------------------------------------------------------------------------------------------------------------------------------------------------------------------------|------------------------------------------------------------------|-------------------------------|
| 1                                                                                                                                                                                                                                                                                                                                                                                                                                   | exp Organ Transplantation/                                       |                               |
| 2                                                                                                                                                                                                                                                                                                                                                                                                                                   | transplant*.ti,ab.                                               |                               |
| 3                                                                                                                                                                                                                                                                                                                                                                                                                                   | 1 and 2                                                          |                               |
| 4                                                                                                                                                                                                                                                                                                                                                                                                                                   | China.in.                                                        |                               |
| 5                                                                                                                                                                                                                                                                                                                                                                                                                                   | 3 and 4                                                          |                               |
| 6                                                                                                                                                                                                                                                                                                                                                                                                                                   | stem cells.ti,ab.                                                |                               |
| 7                                                                                                                                                                                                                                                                                                                                                                                                                                   | mice.ti,ab.                                                      |                               |
| 8                                                                                                                                                                                                                                                                                                                                                                                                                                   | Living Donors/                                                   |                               |
| 9                                                                                                                                                                                                                                                                                                                                                                                                                                   | living donor.ti,ab.                                              |                               |
| 10                                                                                                                                                                                                                                                                                                                                                                                                                                  | Case Reports/                                                    |                               |
| 11                                                                                                                                                                                                                                                                                                                                                                                                                                  | or/6-10                                                          |                               |
| 12                                                                                                                                                                                                                                                                                                                                                                                                                                  | 5 not 11                                                         |                               |
| 13                                                                                                                                                                                                                                                                                                                                                                                                                                  | limit 12 to (English language and humans and yr="2000 -Current") |                               |
| <b>Timespan:</b> 2000-2017 (5 April)                                                                                                                                                                                                                                                                                                                                                                                                |                                                                  |                               |
| <b>SCOPUS</b>                                                                                                                                                                                                                                                                                                                                                                                                                       |                                                                  | <b>Results<br/>:<br/>2050</b> |
| (( TITLE ( transplant* ) AND AFFILCOUNTRY ( china ) AND NOT TITLE-ABS-KEY ( mice OR "stem cell" OR "living donor" OR "case report" )) AND PUBYEAR > 1999 ) AND ( EXCLUDE ( DOCTYPE , "cp " ) OR EXCLUDE ( DOCTYPE , "le " ) OR EXCLUDE ( DOCTYPE , "ed " )) AND ( LIMIT-TO ( LANGUAGE , "English " ) ) AND ( LIMIT-TO ( EXACTKEYWORD , "Human " ) OR LIMIT-TO ( EXACTKEYWORD , "Male " ) OR LIMIT-TO ( EXACTKEYWORD , "Female " ) ) |                                                                  |                               |
| <b>Embase</b>                                                                                                                                                                                                                                                                                                                                                                                                                       |                                                                  | <b>Results<br/>:<br/>2971</b> |
| 1                                                                                                                                                                                                                                                                                                                                                                                                                                   | exp organ transplantation/                                       |                               |
| 2                                                                                                                                                                                                                                                                                                                                                                                                                                   | china.in.                                                        |                               |
| 3                                                                                                                                                                                                                                                                                                                                                                                                                                   | 1 and 2                                                          |                               |
| 4                                                                                                                                                                                                                                                                                                                                                                                                                                   | stem cells.ti,ab.                                                |                               |
| 5                                                                                                                                                                                                                                                                                                                                                                                                                                   | mice.ti,ab.                                                      |                               |
| 6                                                                                                                                                                                                                                                                                                                                                                                                                                   | practice guideline/                                              |                               |
| 7                                                                                                                                                                                                                                                                                                                                                                                                                                   | *"living donor"/                                                 |                               |
| 8                                                                                                                                                                                                                                                                                                                                                                                                                                   | living donor.ti,ab.                                              |                               |
| 9                                                                                                                                                                                                                                                                                                                                                                                                                                   | or/4-8                                                           |                               |
| 10                                                                                                                                                                                                                                                                                                                                                                                                                                  | 3 not 9                                                          |                               |
| 11                                                                                                                                                                                                                                                                                                                                                                                                                                  | limit 10 to (human and English language and yr="2000 -Current")  |                               |



|    |                                                                 |  |  |
|----|-----------------------------------------------------------------|--|--|
| 12 | limit 11 to article                                             |  |  |
| 13 | transplant*.ti,ab.                                              |  |  |
| 14 | 1 and 13                                                        |  |  |
| 15 | 2 and 14                                                        |  |  |
| 16 | 15 not 9                                                        |  |  |
| 17 | limit 16 to (human and English language and yr="2000 -Current") |  |  |
| 18 | limit 17 to article                                             |  |  |
| 19 | case report/                                                    |  |  |
| 20 | 18 not 19                                                       |  |  |

**Timespan:** 2000-2017 (5 April).  
Search language=Auto

## Supplementary File 2: Details extracted from included studies

| Column ID | Descriptor                                                                                                                                                                                                                                                                                                                                                                                                                       |
|-----------|----------------------------------------------------------------------------------------------------------------------------------------------------------------------------------------------------------------------------------------------------------------------------------------------------------------------------------------------------------------------------------------------------------------------------------|
| A         | EndNote reference number                                                                                                                                                                                                                                                                                                                                                                                                         |
| B         | Title and abstract                                                                                                                                                                                                                                                                                                                                                                                                               |
| C         | Journal title                                                                                                                                                                                                                                                                                                                                                                                                                    |
| D         | url                                                                                                                                                                                                                                                                                                                                                                                                                              |
| E         | 0: Exclude<br>1: Include<br>2: Paper not available<br>3: For discussion                                                                                                                                                                                                                                                                                                                                                          |
| F         | Exclusion reason (see Table 2 for more details)                                                                                                                                                                                                                                                                                                                                                                                  |
| G         | Publication year                                                                                                                                                                                                                                                                                                                                                                                                                 |
| H         | Organ type: 1=hearts; 2=livers; 3=lungs; 4=other(combined)                                                                                                                                                                                                                                                                                                                                                                       |
| I         | Are organ sources (donors) clearly identified as deceased?<br>DD=deceased donors.                                                                                                                                                                                                                                                                                                                                                |
| J         | Number of recipients with deceased or unknown source of transplants reported in research                                                                                                                                                                                                                                                                                                                                         |
| K         | Year/month in which first transplants took place                                                                                                                                                                                                                                                                                                                                                                                 |
| L         | Year/month in which final transplants took place                                                                                                                                                                                                                                                                                                                                                                                 |
| M         | Presence (=1) or absence (=0) of Institutional Review Board (Research Ethics Committee) approval for the research                                                                                                                                                                                                                                                                                                                |
| N         | Copy of text reporting ethics approval, if present                                                                                                                                                                                                                                                                                                                                                                               |
| O         | Information on identity of organ sources:<br>0 = No statement about identity of organ sources<br>1 = Explicit statement that organs came from volunteers or that no prisoners' organs were used<br>2 = Explicit statement that organs came from prisoners<br>3 = Sources mixed (i.e., prisoner and volunteer)<br>4 = Other (make note in column R)                                                                               |
| P         | Copy of text reporting identity of sources, if present. This included any papers in which there was some statement that organs did not come from executed prisoners, or came from volunteers, or source gave consent etc.                                                                                                                                                                                                        |
| Q         | Type of donation:<br>0 = No information<br>DBD = Donation after brain death – (death certified on neurological criteria)<br>DCD = Donation after cardiac death – or non-heart beating (death declared on circulatory criteria)<br>CDCD = China donation after citizen death - (a new China specific descriptor which denotes death declared on both neurological and circulatory criteria)<br>OT = Other (make note in column R) |
| R         | Comments                                                                                                                                                                                                                                                                                                                                                                                                                         |
| S         | Initials of author doing data extraction for this paper                                                                                                                                                                                                                                                                                                                                                                          |
| T         | Initials of author if this entry was checked                                                                                                                                                                                                                                                                                                                                                                                     |
| U         | Institution where transplants took place                                                                                                                                                                                                                                                                                                                                                                                         |

For the Results Table in Supplementary File 4, we have omitted the administrative data e.g EndNote reference numbers, initials of authors doing extractions and checks), the data relating to exclusions (as we are not reporting on these), and the institution where the transplants took place (because this was inconsistently reported by data extractors and was not relevant to the research questions). As a result, the final columns in the Results table are:

| Column ID | Descriptor                                                                                                                                                                                                                                                                                                                                                                                               |
|-----------|----------------------------------------------------------------------------------------------------------------------------------------------------------------------------------------------------------------------------------------------------------------------------------------------------------------------------------------------------------------------------------------------------------|
| A         | Title and abstract                                                                                                                                                                                                                                                                                                                                                                                       |
| B         | Journal title                                                                                                                                                                                                                                                                                                                                                                                            |
| C         | Publication year                                                                                                                                                                                                                                                                                                                                                                                         |
| D         | Organ type                                                                                                                                                                                                                                                                                                                                                                                               |
| E         | Are organ sources (donors) clearly identified as deceased?<br>DD=deceased donors.                                                                                                                                                                                                                                                                                                                        |
| F         | Number of recipients with deceased or unknown source of transplants reported in research                                                                                                                                                                                                                                                                                                                 |
| G         | Year/month in which first transplants took place                                                                                                                                                                                                                                                                                                                                                         |
| H         | Year/month in which final transplants took place                                                                                                                                                                                                                                                                                                                                                         |
| I         | Institutional Review Board (Research Ethics Committee) approval for the research                                                                                                                                                                                                                                                                                                                         |
| J         | Copy of text reporting ethics approval, if present                                                                                                                                                                                                                                                                                                                                                       |
| K         | Information on identity of organ sources:<br>0 = No statement about identity of organ sources<br>1 = Explicit statement that organs came from volunteers or that no prisoners' organs were used<br>2 = Explicit statement that organs came from prisoners<br>3 = Sources mixed (i.e., prisoner and volunteer)<br>4 = Other                                                                               |
| L         | Copy of text reporting identity of sources, if present. This included any papers in which there was some statement that organs did not come from executed prisoners, or came from volunteers, or source gave consent etc.                                                                                                                                                                                |
| M         | Presence (=1) or absence (=0) of                                                                                                                                                                                                                                                                                                                                                                         |
| N         | Type of donation:<br>0 = No information<br>DBD = Donation after brain death – (death certified on neurological criteria)<br>DCD = Donation after cardiac death – or non-heart beating (death declared on circulatory criteria)<br>CDCD = China donation after citizen death - (a new China specific descriptor which denotes death declared on both neurological and circulatory criteria)<br>OT = Other |

**Supplementary File: Full list of 445 studies, bibliographic details**

1. Aidong W, Zhenjie C, Tong L, et al. Therapeutic drug monitoring of tacrolimus in early stage after heart transplantation. *Transplant Proc* 2004;36(8):2388-9 Online First.
2. Awang DVC, Kong L, Jiang W. Schisandra extract elevates concentration of tacrolimus in blood of liver transplant patients. *Focus on Alternative and Complementary Therapies* 2010;15(3):236-37 doi: 10.1111/j.2042-7166.2010.01045\_9.xpublished Online First.
3. Bai DS, Dai Z, Zhou J, et al. Capn4 overexpression underlies tumor invasion and metastasis after liver transplantation for hepatocellular carcinoma. *Hepatology* 2009;49(2):460-70 doi: 10.1002/hep.22638published Online First.
4. Bu X, Zheng Z, Yu Y, et al. Significance of C4d Deposition in the Diagnosis of Rejection After Liver Transplantation. *Transplant Proc* 2006;38(5):1418-21 doi: 10.1016/j.transproceed.2006.03.018published Online First.
5. Cai CJ, Lu MQ, Chen YH, et al. Clinical study on prevention of HBV re-infection by entecavir after liver transplantation. *Clin Transplant* 2012;26(2):208-15 doi: 10.1111/j.1399-0012.2011.01448.xpublished Online First.
6. Cai Q, Li S, Jiang Y, et al. Alleviating graft injury during liver transplantation by improving retrograde perfusion in standard orthotopic liver transplantation. *Int J Clin Exp Med* 2016;9(2):4364-71 Online First.
7. Cai X, Liu F, Zhu F, et al. Cholangiographic features and endoscopic treatment of biliary strictures. *Int J Clin Exp Med* 2015;8(2):2586-92 Online First.
8. Chen B, Gu Z, Chen H, et al. Establishment of high-performance liquid chromatography and enzyme multiplied immunoassay technology methods for determination of free mycophenolic acid and its application in Chinese liver transplant recipients. *Ther Drug Monit* 2010;32(5):653-60 doi: 10.1097/FTD.0b013e3181f01397published Online First.
9. Chen D, Fan J, Guo F, et al. Novel single nucleotide polymorphisms in interleukin 6 affect tacrolimus metabolism in liver transplant patients. *PLoS One* 2013;8(8) doi: 10.1371/journal.pone.0073405published Online First.

10. Chen D, Guo F, Shi J, et al. Association of hemoglobin levels, CYP3A5, and NR1I3 gene polymorphisms with tacrolimus pharmacokinetics in liver transplant patients. *Drug Metab Pharmacokinet* 2014;29(3):249-53 doi: 10.2133/dmpk.DMPK-13-RG-095published Online First.
11. Chen D, Liu S, Chen S, et al. Donor interleukin 6 gene polymorphisms predict the recurrence of hepatocellular carcinoma after liver transplantation. *Int J Clin Oncol* 2016;21(6):1111-19 Online First.
12. Chen G, Liu H, Hu ZQ, et al. A new scheme with infusion of hepatitis B immunoglobulin combined with entecavir for prophylaxis of hepatitis B virus recurrence among liver transplant recipients. *Eur J Gastroenterol Hepatol* 2015;27(8):901-06 doi: 10.1097/MEG.0000000000000388published Online First.
13. Chen GH, Fu BS, Cai CJ, et al. A single-center experience of retransplantation for liver transplant recipients with a failing graft. *Transplant Proc* 2008;40(5):1485-87 doi: 10.1016/j.transproceed.2008.01.076published Online First.
14. Chen GH, Wang GY, Yang Y, et al. Single-center experience of therapeutic management of hepatic artery stenosis after orthotopic liver transplantation: Report of 20 cases. *Eur Surg Res* 2009;42(1):21-27 doi: 10.1159/000166601published Online First.
15. Chen GH, Yang Y, Lu MQ, et al. Liver transplantation for end-stage alcoholic liver disease: a single-center experience from mainland China. *Alcohol* 2010;44(3):217-21 doi: 10.1016/j.alcohol.2010.02.010published Online First.
16. Chen H, Chen E, Mao A, et al. Validation of limited sampling strategy for the estimation of mycophenolic acid exposure in Chinese adult liver transplant recipients. *Liver Transpl* 2007;13(12):1684-93 doi: 10.1002/lt.21293published Online First.
17. Chen H, Gu Z, Chen B, et al. Models for the prediction of mycophenolic acid area under the curve using a limited-sampling strategy and an enzyme multiplied immunoassay technique in chinese patients undergoing liver transplantation. *Clin Ther* 2008;30(12):2387-401 doi: 10.1016/j.clinthera.2008.12.017published Online First.

- 1  
2  
3 18. Chen H, Miao R, Fan J, et al. Decreased expression of miR-126 correlates with  
4 metastatic recurrence of hepatocellular carcinoma. *Clin Exp Metastasis*  
5 2013;30(5):651-58 Online First.  
6  
7
- 8 19. Chen H, Peng C, Yu Z, et al. Pharmacokinetics of mycophenolic acid and  
9 determination of area under the curve by abbreviated sampling strategy in Chinese  
10 liver transplant recipients. *Clin Pharmacokinet* 2007;46(2):175-85 doi:  
11 10.2165/00003088-200746020-00005published Online First.  
12  
13
- 14 20. Chen HY, Han ZB, Fan JW, et al. MiR-203 expression predicts outcome after liver  
15 transplantation for hepatocellular carcinoma in cirrhotic liver. *Med Oncol*  
16 2012;29(3):1859-65 doi: 10.1007/s12032-011-0031-9published Online First.  
17  
18
- 19 21. Chen J, Li Y, Wang L, et al. Association of three SNPs in interleukin-28B with graft  
20 hepatic dysfunction after liver transplantation in Chinese Han population. *Gene*  
21 2012;508(1):121-24 doi: 10.1016/j.gene.2012.07.065published Online First.  
22  
23
- 24 22. Chen J, Wang Y, Shen Z, et al. Early diagnostic value of plasma PCT and BG assay  
25 for CRBSI after OLT. *Transplant Proc* 2011;43(5):1777-79 Online First.  
26  
27
- 28 23. Chen J, Zhong L. Clinical significance of serum hepcidin-25 levels in predicting  
29 invasive fungal disease in patients after transplantation. *Eur Rev Med Pharmacol Sci*  
30 2013;17(13):1769-73 Online First.  
31  
32
- 33 24. Chen P, Wang W, Yan L, et al. Risk factors for first-year hospital readmission after  
34 liver transplantation. *Eur J Gastroenterol Hepatol* 2015;27(5):600-06 doi:  
35 10.1097/MEG.00000000000003272015published Online First.  
36  
37
- 38 25. Chen X, Meng X, Xu Y, et al. Cytokine and human leukocyte antigen (HLA) profile  
39 for graft-versus-host disease (GVHD) after organ transplantation. *Eur J Med Res*  
40 2016;21(1):1-6 Online First.  
41  
42
- 43 26. Chen XY, Hou PF, Bi J, et al. Detection of human cytomegalovirus DNA in various  
44 blood components after liver transplantation. *Braz J Med Biol Res* 2014;47(4):340-44  
45  
46  
47  
48  
49
- 50 27. Chen Y, Zhang H, Xiao X, et al. Peripheral blood transcriptome sequencing reveals  
51 rejection-relevant genes in long-term heart transplantation. *Int J Cardiol*  
52 2013;168(3):2726-33 doi: 10.1016/j.ijcard.2013.03.095published Online First.  
53  
54  
55  
56  
57  
58  
59

- 1
  - 2
  - 3
  - 4
  - 5
  - 6
  - 7
  - 8
  - 9
  - 10
  - 11
  - 12
  - 13
  - 14
  - 15
  - 16
  - 17
  - 18
  - 19
  - 20
  - 21
  - 22
  - 23
  - 24
  - 25
  - 26
  - 27
  - 28
  - 29
  - 30
  - 31
  - 32
  - 33
  - 34
  - 35
  - 36
  - 37
  - 38
  - 39
  - 40
  - 41
  - 42
  - 43
  - 44
  - 45
  - 46
  - 47
  - 48
  - 49
  - 50
  - 51
  - 52
  - 53
  - 54
  - 55
  - 56
  - 57
  - 58
  - 59
  - 60
28. Chen YB, Li SD, Ju BL, et al. Suitable calcineurin inhibitor concentrations for liver transplant recipients in the Chinese population. *Transplant Proc* 2011;43(5):1751-53 doi: 10.1016/j.transproceed.2010.11.025published Online First.
29. Chen Z, Gong R, Luo Y, et al. Surgical procedures for hepatolithiasis. *Hepatogastroenterology* 2010;57(97):134-7 Online First.
30. Chen ZS, Zeng FJ, Ming CS, et al. The survival and value of liver transplantation for liver carcinoma: a single-center experience. *Transplant Proc* 2004;36(8):2284-6 Online First.
31. Chen ZY, Yan LN, Zeng Y, et al. Preliminary Experience With Indications for Liver Transplantation for Hepatolithiasis. *Transplant Proc* 2008;40(10):3517-22 doi: 10.1016/j.transproceed.2008.07.142published Online First.
32. Cheng J, Xie HY, Xu X, et al. NDRG1 as a biomarker for metastasis, recurrence and of poor prognosis in hepatocellular carcinoma. *Cancer Lett* 2011;310(1):35-45 Online First.
33. Cheng JW, Shi YH, Fan J, et al. An immune function assay predicts post-transplant recurrence in patients with hepatocellular carcinoma. *J Cancer Res Clin Oncol* 2011;137(10):1445-53 doi: 10.1007/s00432-011-1014-0published Online First.
34. Cheng L, Tian F, Tang L, et al. Local distribution analysis of cytotoxic molecules in liver allograft is helpful for the diagnosis of acute cellular rejection after orthotopic liver transplantation. *Diagn Pathol* 2012;7(1) doi: 10.1186/1746-1596-7-148published Online First.
35. Cheng Y, Huang L, Zhang X, et al. Liver transplantation nearly normalizes brain spontaneous activity and cognitive function at 1 month: A resting-state functional MRI study. *Metab Brain Dis* 2015;30(4):979-88 doi: 10.1007/s11011-015-9657-1published Online First.
36. Cheng Y, Huang LX, Zhang L, et al. Longitudinal intrinsic brain activity changes in cirrhotic patients before and one month after liver transplantation. *Korean Journal of Radiology* 2017;18(2):370-77 Online First.
37. Chu Z, Zhang J, Zhao Y, et al. Influence of immunosuppressive drugs on the development of CD4 +CD25high Foxp3+ T cells in liver transplant recipients.

- 1  
2  
3 Transplant Proc 2010;42(7):2599-601 doi:  
4 10.1016/j.transproceed.2010.04.026published Online First.  
5  
6  
7 38. Chuan W, Li C, Wen TF, et al. Short-term and long-term outcomes of surgical  
8 treatment for HCC within milan criteria with cirrhotic portal hypertension.  
9 Hepatogastroenterology 2014;61(136):2185-90 Online First.  
10  
11 39. Dai X, Zhao HQ, Liu RH, et al. Percutaneous radiofrequency ablation guided by  
12 contrastenhanced ultrasound in treatment of metastatic hepatocellular carcinoma after  
13 liver transplantation. Asian Pac J Cancer Prev 2012;13(8):3709-12 Online First.  
14  
15 40. Dai Y, Li C, Wen TF, et al. Comparison of liver resection and transplantation for  
16 Child-pugh A cirrhotic patient with very early hepatocellular carcinoma and portal  
17 hypertension. Pakistan Journal of Medical Sciences 2014;30(5) doi:  
18 10.12669/pjms.305.5038published Online First.  
19  
20 41. Deng JF, Geng L, Qian YG, et al. The role of toll-like receptors 2 and 4 in acute  
21 allograft rejection after liver transplantation. Transplant Proc 2007;39(10):3222-24  
22 doi: 10.1016/j.transproceed.2007.02.102published Online First.  
23  
24 42. Dong J, Zhu Y, Ma F, et al. Conditional disease-free survival after liver  
25 transplantation for hepatocellular carcinoma: A two-center experience. Medicine  
26 (United States) 2016;95(31) doi: 10.1097/MD.0000000000004383published Online  
27 First.  
28  
29 43. Dong JY, Yin H, Li RD, et al. The relationship between adenosine triphosphate  
30 within CD4+ T lymphocytes and acute rejection after liver transplantation. Clin  
31 Transplant 2011;25(3):E292-E96 doi: 10.1111/j.1399-0012.2011.01429.xpublished  
32 Online First.  
33  
34 44. Duan BW, Lu SC, Lai W, et al. The detection of (total and ccc) HBV DNA in liver  
35 transplant recipients with hepatitis B vaccine against HBV reinfection. Human  
36 Vaccines and Immunotherapeutics 2015;11(10):2490-94 doi:  
37 10.1080/21645515.2015.1063755published Online First.  
38  
39 45. Duan BW, Lu SC, Wu JS, et al. Model for end-stage liver disease (MELD) score does  
40 not predict outcomes of hepatitis be induced acute-on-chronic liver failure in  
41 transplant recipients. Transplant Proc 2014;46(10):3502-06 doi:  
42 10.1016/j.transproceed.2014.07.075published Online First.  
43  
44  
45  
46  
47  
48  
49  
50  
51  
52  
53  
54  
55  
56  
57  
58  
59  
60



- 1
  - 2
  - 3
  - 4
  - 5
  - 6
  - 7
  - 8
  - 9
  - 10
  - 11
  - 12
  - 13
  - 14
  - 15
  - 16
  - 17
  - 18
  - 19
  - 20
  - 21
  - 22
  - 23
  - 24
  - 25
  - 26
  - 27
  - 28
  - 29
  - 30
  - 31
  - 32
  - 33
  - 34
  - 35
  - 36
  - 37
  - 38
  - 39
  - 40
  - 41
  - 42
  - 43
  - 44
  - 45
  - 46
  - 47
  - 48
  - 49
  - 50
  - 51
  - 52
  - 53
  - 54
  - 55
  - 56
  - 57
  - 58
  - 59
  - 60
46. Fan J, Yang GS, Fu ZR, et al. Liver transplantation outcomes in 1,078 hepatocellular carcinoma patients: A multi-center experience in Shanghai, China. *J Cancer Res Clin Oncol* 2009;135(10):1403-12 doi: 10.1007/s00432-009-0584-6published Online First.
47. Fan J, Zhang X, Chen XM, et al. Monitoring of human cytomegalovirus glycoprotein B genotypes using real-time quantitative PCR in immunocompromised Chinese patients. *J Virol Methods* 2009;160(1-2):74-77 Online First.
48. Fan J, Zhang X, Ren L, et al. Donor IL-18 rs5744247 polymorphism as a new biomarker of tacrolimus elimination in Chinese liver transplant patients during the early post-transplantation period: Results from two cohort studies. *Pharmacogenomics* 2015;16(3):239-50 doi: 10.2217/pgs.14.166published Online First.
49. Fan X, Chen Z, Nasralla D, et al. The organ preservation and enhancement of donation success ratio effect of extracorporeal membrane oxygenation in circulatory unstable brain death donor. *Clin Transplant* 2016;30(10):1306-13 Online First.
50. Fang C, Yan S, Liu J, et al. Gastrointestinal perforation after liver transplantation. *Surgical Practice* 2016;20(1):8-12 Online First.
51. Feng ZY, Xu X, Zhu SM, et al. Effects of low central venous pressure during preanhepatic phase on blood loss and liver and renal function in liver transplantation. *World J Surg* 2010;34(8):1864-73 doi: 10.1007/s00268-010-0544-ypublished Online First.
52. Fu BS, Zhang T, Li H, et al. The role of liver transplantation for intrahepatic cholangiocarcinoma: A single-center experience. *Eur Surg Res* 2011;47(4):218-21 doi: 10.1159/000332827published Online First.
53. Fu SJ, Ji F, Han M, et al. Prognostic value of combined preoperative fibrinogen and neutrophil-lymphocyte ratio in patients with hepatocellular carcinoma after liver transplantation. *Oncotarget* 2017;8(3):4301-12 Online First.
54. Fu YW, Wang WG, Zhou HL, et al. Presence of donor-and-recipient-derived DNA microchimerism in the cell-free blood samples of renal transplantation recipients associates with the acceptance of transplanted kidneys. *Asian Journal of Andrology* 2006;8(4):477-82 doi: 10.1111/j.1745-7262.2006.00147.xpublished Online First.

- 1  
2  
3 55. Gao F, Ye Q, Wan Q, et al. Distribution and resistance of pathogens in liver  
4 transplant recipients with *Acinetobacter baumannii* infection. *Ther Clin Risk Manag*  
5 2015;11:501-05 doi: 10.2147/TCRM.S82251published Online First.  
6  
7  
8 56. Gao PJ, Gao J, Li Z, et al. Hepatocellular carcinoma recurrence is an independent risk  
9 factor for HB recurrence after liver transplantation. *Hepatogastroenterology*  
10 2014;61(134):1523-28 doi: 10.5754/hge14454published Online First.  
11  
12  
13 57. Gao PJ, Gao J, Li Z, et al. Liver transplantation in adults with portal vein thrombosis:  
14 Data from the China Liver Transplant Registry. *Clinics and Research in Hepatology*  
15 and *Gastroenterology* 2016;40(3):327-32 Online First.  
16  
17  
18 58. Gao S, Lin BY, Yang Z, et al. Role of overexpression of MACC1 and/or FAK in  
19 predicting prognosis of hepatocellular carcinoma after liver transplantation. *Int J Med*  
20 *Sci* 2014;11(3):268-75 doi: 10.7150/ijms.7769published Online First.  
21  
22  
23 59. Gao S, Yang Z, Zheng ZY, et al. Reduced expression of DACT2 promotes  
24 hepatocellular carcinoma progression: Involvement of methylation-mediated gene  
25 silencing. *World J Surg Oncol* 2013;11 Online First.  
26  
27  
28 60. Gao Y, Ren H, Meng F, et al. Pathological roles of interleukin-22 in the development  
29 of recurrent hepatitis C after liver transplantation. *PLoS One* 2016;11(4) doi:  
30 10.1371/journal.pone.0154419published Online First.  
31  
32  
33 61. Gao Y, Zhang M, Li J, et al. Circulating FoxP3+ regulatory T and interleukin17-  
34 producing Th17 cells actively influence HBV clearance in De Novo Hepatitis B virus  
35 infected patients after orthotopic liver transplantation. *PLoS One* 2015;10(9) doi:  
36 10.1371/journal.pone.0137881published Online First.  
37  
38  
39 62. Gao YJ, Zhang M, Jin B, et al. A clinical-pathological analysis of hepatitis B virus  
40 recurrence after liver transplantation in Chinese patients. *Journal of Gastroenterology*  
41 and *Hepatology (Australia)* 2014;29(3):554-60 doi: 10.1111/jgh.12404published  
42 Online First.  
43  
44  
45 63. Gu L, Jin W, Kan L, et al. A retrospective study to compare the use of tacrolimus and  
46 cyclosporine in combination with adriamycin in post-transplant liver cancer patients.  
47 *Cell Biochem Biophys* 2014;71(2):565-70 doi: 10.1007/s12013-014-0235-7published  
48 Online First.  
49  
50  
51  
52  
53  
54  
55  
56  
57  
58  
59

- 1  
2  
3 64. Gu L, Yu YC. Clinical outcome of dental implants placed in liver transplant  
4 recipients after 3 years: A case series. *Transplant Proc* 2011;43(7):2678-82 doi:  
5 10.1016/j.transproceed.2011.06.037published Online First.  
6  
7  
8 65. Gu LH, Fang H, Li FH, et al. Prediction of early hepatic artery thrombosis by  
9 intraoperative color doppler ultrasound in pediatric segmental liver transplantation.  
10 *Clin Transplant* 2012;26(4):571-76 doi: 10.1111/j.1399-0012.2011.01580.xpublished  
11 Online First.  
12  
13  
14 66. Gu Z, Chen B, Song Y, et al. Pharmacokinetics of free mycophenolic acid and limited  
15 sampling strategy for the estimation of area under the curve in liver transplant  
16 patients. *Eur J Pharm Sci* 2012;47(4):636-41 doi:  
17 10.1016/j.ejps.2012.08.001published Online First.  
18  
19  
20 67. Guo CB, Li YC, Zhang MM, et al. Early postoperative care of liver transplantation  
21 for infants with biliary atresia during pediatric intensive care unit stay. *Transplant*  
22 *Proc* 2010;42(5):1750-54 doi: 10.1016/j.transproceed.2010.02.086published Online  
23 First.  
24  
25  
26 68. Guo QL, Duan BW, Lu SC, et al. Liver transplantation for hepatitis B-related acute-  
27 on-chronic liver failure patients. *Int J Clin Exp Med* 2017;10(2):2882-89 Online First.  
28  
29  
30 69. Guo W, Sheng J, Gu Y, et al. Analysis and forecast for multidrug-resistant  
31 *Acinetobacter baumannii* infections among liver transplant recipients. *Transplant*  
32 *Proc* 2014;46(5):1448-52 doi: 10.1016/j.transproceed.2014.02.027published Online  
33 First.  
34  
35  
36 70. Guo Z, He X, Wu L, et al. Model for end-stage liver disease versus the Child-Pugh  
37 score in predicting the post-transplant 3-month and 1-year mortality in a cohort of  
38 Chinese recipients. *Surg Today* 2010;40(1):38-45 doi: 10.1007/s00595-009-4114-  
39 6published Online First.  
40  
41  
42 71. Gurbanov E, Meng X, Cui Y, et al. Evaluation ECMO in adult cardiac transplantation:  
43 can outcomes of marginal donor hearts be improved? *J Cardiovasc Surg (Torino)*  
44 2011;52(3):419-27 Online First.  
45  
46  
47 72. Han ZB, Chen HY, Fan JW, et al. Up-regulation of microRNA-155 promotes cancer  
48 cell invasion and predicts poor survival of hepatocellular carcinoma following liver  
49 transplantation. *J Cancer Res Clin Oncol* 2011:1-9 Online First.  
50  
51  
52  
53  
54  
55  
56  
57  
58  
59  
60

- 1  
2  
3 73. Han ZB, Zhong L, Teng MJ, et al. Identification of recurrence-related microRNAs in  
4 hepatocellular carcinoma following liver transplantation. *Mol Oncol* 2012;6(4):445-  
5 57 doi: 10.1016/j.molonc.2012.04.001published Online First.  
6  
7  
8 74. Hao C, Anwei M, Bing C, et al. Monitoring mycophenolic acid pharmacokinetic  
9 parameters in liver transplant recipients: prediction of occurrence of leukopenia.  
10 *Liver Transpl* 2008;14(8):1165-73 Online First.  
11  
12 75. Hao C, Erzheng C, Anwei M, et al. Validation of limited sampling strategy for the  
13 estimation of mycophenolic acid exposure in Chinese adult liver transplant recipients.  
14 *Liver Transpl* 2007;13(12):1684-93 Online First.  
15  
16 76. Hei Z, Chi X, Cheng N, et al. Upregulation of TLR2/4 expression in mononuclear  
17 cells in postoperative systemic inflammatory response syndrome after liver  
18 transplantation. *Mediators Inflamm* 2010;2010 doi: 10.1155/2010/519589published  
19 Online First.  
20  
21 77. Hu B, Gao DJ, Yu FH, et al. Endoscopic stenting for post-transplant biliary stricture:  
22 Usefulness of a novel removable covered metal stent. *Journal of Hepato-Biliary-*  
23 *Pancreatic Sciences* 2011;18(5):640-45 doi: 10.1007/s00534-011-0408-3published  
24 Online First.  
25  
26 78. Hu J, Wang Z, Fan J, et al. Genetic variations in plasma circulating DNA of HBV-  
27 related hepatocellular carcinoma patients predict recurrence after liver transplantation.  
28 *PLoS One* 2011;6(10) doi: 10.1371/journal.pone.0026003published Online First.  
29  
30 79. Hu J, Xie X, Li Y, et al. A novel noninvasive method to detect rejection after heart  
31 transplantation. *Braz J Med Biol Res* 2012;45(12):1195-201 doi: 10.1590/S0100-  
32 879X2012007500164published Online First.  
33  
34 80. Hu WY, Wu LQ, Su Z, et al. Expression of human leukocyte antigen-G and acute  
35 rejection in patients following liver transplantation. *Exp Ther Med* 2014;8(4):1291-95  
36 doi: 10.3892/etm.2014.1917published Online First.  
37  
38 81. Hu XX, Yan LN. Retrospective analysis of prognostic factors after liver  
39 transplantation for intrahepatic cholangiocarcinoma in China: A single-center  
40 experience. *Hepatogastroenterology* 2011;58(109):1255-59 doi:  
41 10.5754/hge10704published Online First.  
42  
43  
44  
45  
46  
47  
48  
49  
50  
51  
52  
53  
54  
55  
56  
57  
58  
59  
60

- 1  
2  
3 82. Hu Y, Zhang X, Liu Y, et al. APACHE IV is superior to MELD scoring system in  
4 predicting prognosis in patients after orthotopic liver transplantation. *Clinical and*  
5 *Developmental Immunology* 2013;2013 doi: 10.1155/2013/809847published Online  
6 First.  
7  
8  
9  
10 83. Hu Z, Zhou J, Li Z, et al. Salvage liver transplantation for recurrent hepatocellular  
11 carcinoma after liver resection: Retrospective study of the Milan and Hangzhou  
12 criteria. *PLoS One* 2014;9(1) doi: 10.1371/journal.pone.0087222published Online  
13 First.  
14  
15  
16  
17 84. Hu Z, Zhou J, Li Z, et al. Time interval to recurrence as a predictor of overall survival  
18 in salvage liver transplantation for patients with hepatocellular carcinoma associated  
19 with hepatitis B virus. *Surgery (United States)* 2015;157(2):239-48 doi:  
20 10.1016/j.surg.2014.09.018published Online First.  
21  
22  
23  
24 85. Huang J, Yan L, Wu H, et al. Is radiofrequency ablation applicable for recurrent  
25 hepatocellular carcinoma after liver transplantation? *J Surg Res* 2016;200(1):122-30  
26 Online First.  
27  
28  
29 86. Huang L, Li GM, Zhu JY, et al. Efficacy of sorafenib after liver transplantation in  
30 patients with primary hepatic carcinoma exceeding the Milan criteria: A preliminary  
31 study. *Onco Targets Ther* 2012;5:457-62 doi: 10.2147/OTT.S31387published Online  
32 First.  
33  
34  
35  
36 87. Huang M, Shan H, Jiang Z, et al. The use of coronary stent in hepatic artery stenosis  
37 after orthotopic liver transplantation. *Eur J Radiol* 2006;60(3):425-30 doi:  
38 10.1016/j.ejrad.2006.06.008published Online First.  
39  
40  
41 88. Huang Q, Zhai RY, Dai DK. Interventional Treatment of Hepatic Artery Stenosis  
42 After Orthotopic Liver Transplantation With Balloon-Expandable Coronary Stent.  
43 *Transplant Proc* 2007;39(10):3245-50 doi:  
44 10.1016/j.transproceed.2007.03.109published Online First.  
45  
46  
47  
48 89. Huang Y, Yang X, Zhao F, et al. Overexpression of Dickkopf-1 predicts poor  
49 prognosis for patients with hepatocellular carcinoma after orthotopic liver  
50 transplantation by promoting cancer metastasis and recurrence. *Med Oncol* 2014;31  
51 (7) Online First.  
52  
53  
54  
55  
56  
57  
58  
59  
60

- 1  
2  
3 90. Huang ZY, Liang BY, Xiong M, et al. Severity of cirrhosis should determine the  
4 operative modality for patients with early hepatocellular carcinoma and compensated  
5 liver function. *Surgery (United States)* 2016;159(2):621-31 Online First.  
6  
7  
8 91. Huijun M, Ji Z, Ping X, et al. Linkage disequilibrium between *tnf- $\alpha$* -308 G/A  
9 promoter and histocompatibility leukocyte antigen alleles in han-nationality lung  
10 transplant recipients from eastern china. *Exp Clin Transplant* 2013;11(3):264-69 doi:  
11 10.6002/ect.2012.0099published Online First.  
12  
13  
14 92. Jiang GQ, Bai DS, Chen P, et al. Starting hemoglobin value predicts early phase  
15 prognosis after liver transplantation. *Transplant Proc* 2011;43(5):1669-73 doi:  
16 10.1016/j.transproceed.2010.12.067published Online First.  
17  
18  
19 93. Jiang L, Lei JY, Wang WT, et al. Immediate radical therapy or conservative  
20 treatments when meeting the Milan criteria for advanced HCC patients after  
21 successful TACE. *J Gastrointest Surg* 2014;18(6):1125-30 Online First.  
22  
23  
24 94. Jiang T, Li C, Duan B, et al. Risk factors for and management of ischemic-type  
25 biliary lesions following orthotopic liver transplantation: A single center experience.  
26 *Ann Hepatol* 2016;15(1):41-46 doi: 10.5604/16652681.1184204published Online  
27 First.  
28  
29  
30 95. Jiang T, Liu S, Xiao X, et al. Diagnosis of rejection after liver transplantation: Use of  
31 phosphorus-31 magnetic resonance spectroscopy (31P-MRS). *Abdom Imaging*  
32 2012;37(5):788-94 doi: 10.1007/s00261-008-9451-1published Online First.  
33  
34  
35 96. Jiang Z, Chen Y, Feng X, et al. Recipient cytotoxic T lymphocyte antigen 4 +49  
36 single-nucleotide polymorphism is not associated with acute rejection after liver  
37 transplantation in Chinese population. *Int J Med Sci* 2013;10(3):250-54 doi:  
38 10.7150/ijms.5511published Online First.  
39  
40  
41 97. Jiang Z, Feng X, Zhang W, et al. Recipient cytotoxic T lymphocyte antigen-4 +49  
42 G/G genotype is associated with reduced incidence of hepatitis B virus recurrence  
43 after liver transplantation among Chinese patients. *Liver International*  
44 2007;27(9):1202-08 doi: 10.1111/j.1478-3231.2007.01553.xpublished Online First.  
45  
46  
47 98. Jiao ZY, Jiao Z. Prophylaxis of recurrent hepatitis b in Chinese patients after liver  
48 transplantation using lamivudine combined with Hepatitis B immune globulin  
49  
50  
51  
52  
53  
54  
55  
56  
57  
58  
59  
60

- 1  
2  
3 according to the titer of antibody to Hepatitis B surface antigen. *Transplant Proc*  
4 2007;39(5):1533-36 doi: 10.1016/j.transproceed.2007.03.062 published Online First.  
5  
6 99. Jin R, Duan H, Zhao C, et al. Pharmacokinetics of cyclosporine A in Chinese heart  
7 transplant recipients. *Immunopharmacol Immunotoxicol* 2012;34(3):519-22 doi:  
8 10.3109/08923973.2011.613400 published Online First.  
9  
10 100. Jin Z, Zhang WX, Chen B, et al. Stepwise regression analysis of the determinants of  
11 blood tacrolimus concentrations in Chinese patients with liver transplant. *Medicinal*  
12 *Chemistry* 2009;5(3):301-04 doi: 10.2174/157340609788185918 published Online  
13 First.  
14  
15 101. Ju W, Chen M, Guo Z, et al. Allografts positive for hepatitis B surface antigen in liver  
16 transplant for disease related to hepatitis B virus. *Exp Clin Transplant*  
17 2013;11(3):245-49 doi: 10.6002/ect.2012.0095 published Online First.  
18  
19 102. Ju WQ, Guo ZY, Liang WH, et al. Sirolimus conversion in liver transplant recipients  
20 with calcineurin inhibitor-induced complications: Efficacy and safety. *Exp Clin*  
21 *Transplant* 2012;10(2):132-35 doi: 10.6002/ect.2010.0126 published Online First.  
22  
23 103. Ju WQ, Guo ZY, Ling X, et al. Twenty-four hour steroid avoidance  
24 immunosuppressive regimen in liver transplant recipients. *Exp Clin Transplant*  
25 2012;10(3):258-62 doi: 10.6002/ect.2010.0127 published Online First.  
26  
27 104. Kong HY, Huang SQ, Zhu SM, et al. Role of anhepatic time in endothelial-related  
28 coagulation in liver transplantation. *Minerva Anesthesiol* 2013;79(4):391-97 Online  
29 First.  
30  
31 105. Kong HY, Wen XH, Huang SQ, et al. Epsilon-aminocaproic acid improves  
32 postrecirculation hemodynamics by reducing intraliver activated protein C  
33 consumption in orthotopic liver transplantation. *World J Surg* 2014;38(1):177-85 doi:  
34 10.1007/s00268-013-2282-4 published Online First.  
35  
36 106. Lai MC, Yang Z, Zhou L, et al. Long non-coding RNA MALAT-1 overexpression  
37 predicts tumor recurrence of hepatocellular carcinoma after liver transplantation. *Med*  
38 *Oncol* 2012;29(3):1810-16 doi: 10.1007/s12032-011-0004-z published Online First.  
39  
40 107. Lei J, Wang W, Yan L. Downstaging advanced hepatocellular carcinoma to the Milan  
41 criteria may provide a comparable outcome to conventional Milan criteria. *J*  
42 *Gastrointest Surg* 2013;17(8):1440-6 Online First.  
43  
44  
45  
46  
47  
48  
49  
50  
51  
52  
53  
54  
55  
56  
57  
58  
59  
60

- 1  
2  
3 108. Lei J, Yan L. Outcome comparisons among the Hangzhou, Chengdu, and UCSF  
4 criteria for hepatocellular carcinoma liver transplantation after successful  
5 downstaging therapies. *J Gastrointest Surg* 2013;17(6):1116-22 doi: 10.1007/s11605-  
6 013-2140-6published Online First.  
7  
8  
9  
10 109. Lei JY, Wang WT, Yan LN. Hangzhou criteria for liver transplantation in  
11 hepatocellular carcinoma: A single-center experience. *Eur J Gastroenterol Hepatol*  
12 2014;26(2):200-04 doi: 10.1097/MEG.0b013e3283652b66published Online First.  
13  
14  
15 110. Lei JY, Yan LN, Wang WT, et al. Health-related quality of life and psychological  
16 distress in patients with early-stage hepatocellular carcinoma after hepatic resection  
17 or transplantation. *Transplant Proc* 2016;48(6):2107-11 Online First.  
18  
19  
20 111. Lei JY, Yan LN, Zhu JQ, et al. Hepatocellular carcinoma patients may benefit from  
21 postoperative huaier aqueous extract after liver transplantation. *Transplant Proc*  
22 2015;47(10):2920-24 doi: 10.1016/j.transproceed.2015.10.045published Online First.  
23  
24  
25 112. Li C, Zhang F, Zhang W, et al. Feasibility of 125I brachytherapy combined with  
26 sorafenib treatment in patients with multiple lung metastases after liver  
27 transplantation for hepatocellular carcinoma. *J Cancer Res Clin Oncol*  
28 2010;136(11):1633-40 doi: 10.1007/s00432-010-0821-zpublished Online First.  
29  
30  
31 113. Li C, Zhu WJ, Wen TF, et al. Child-Pugh A Hepatitis B-Related Cirrhotic Patients  
32 with a Single Hepatocellular Carcinoma Up to 5 cm: Liver Transplantation vs.  
33 Resection. *J Gastrointest Surg* 2014;18(8):1469-76 doi: 10.1007/s11605-014-2550-  
34 0published Online First.  
35  
36  
37 114. Li D, Lu T, Shen C, et al. Expression of fibroblast growth factor 21 in patients with  
38 biliary atresia. *Cytokine* 2016;83:13-18 Online First.  
39  
40  
41 115. Li D, Lu W, Zhu JY, et al. Population pharmacokinetics of tacrolimus and CYP3A5,  
42 MDR1 and IL-10 polymorphisms in adult liver transplant patients. *J Clin Pharm Ther*  
43 2007;32(5):505-15 doi: 10.1111/j.1365-2710.2007.00850.xpublished Online First.  
44  
45  
46 116. Li D, Zhu JY, Gao J, et al. Polymorphisms of tumor necrosis factor- $\alpha$ , interleukin-10,  
47 cytochrome P450 3A5 and ABCB1 in Chinese liver transplant patients treated with  
48 immunosuppressant tacrolimus. *Clin Chim Acta* 2007;383(1-2):133-39 doi:  
49 10.1016/j.cca.2007.05.008published Online First.  
50  
51  
52  
53  
54  
55  
56  
57  
58  
59  
60



- 1  
2  
3 117. Li F, Yang M, Li B, et al. Initial clinical results of orthotopic liver transplantation for  
4 hepatic alveolar echinococcosis. *Liver Transpl* 2007;13(6):924-26 doi:  
5  
6 10.1002/lt.21187published Online First.  
7  
8 118. Li H, He JW, Fu BS, et al. Immunosuppressant-related hip pain after orthotopic liver  
9 transplant. *Exp Clin Transplant* 2013;11(1):32-38 doi:  
10  
11 10.6002/ect.2012.0026published Online First.  
12  
13 119. Li H, Li B, Wei Y, et al. Preoperative transarterial chemoembolization does not  
14 increase hepatic artery complications after liver transplantation: A single center 12-  
15 year experience. *Clinics and Research in Hepatology and Gastroenterology*  
16 2015;39(4):451-57 doi: 10.1016/j.clinre.2014.12.004published Online First.  
17  
18 120. Li H, Li J, Wang Y, et al. Proteomic analysis of effluents from perfused human heart  
19 for transplantation: Identification of potential biomarkers for ischemic heart damage.  
20 *Proteome Science* 2012;10(1) doi: 10.1186/1477-5956-10-21published Online First.  
21  
22 121. Li H, Wang S, Wang G, et al. Yes-associated protein expression is a predictive  
23 marker for recurrence of hepatocellular carcinoma after liver transplantation. *Dig*  
24 *Surg* 2014;31(6):468-78 doi: 10.1159/000370252published Online First.  
25  
26 122. Li H, Xie HY, Zhou L, et al. Copy number variation in CCL3L1 gene is associated  
27 with susceptibility to acute rejection in patients after liver transplantation. *Clin*  
28 *Transplant* 2012;26(2):314-21 doi: 10.1111/j.1399-0012.2011.01486.xpublished  
29 Online First.  
30  
31 123. Li H, Xie HY, Zhou L, et al. Lack of association of the polymorphism of the CCR5  
32 gene in liver recipients with acute rejection from China. *Exp Clin Transplant*  
33 2011;9(4):252-57 Online First.  
34  
35 124. Li H, Yang S, Chen H, et al. Survival after heart transplantation for non-metastatic  
36 primary cardiac sarcoma. *J Cardiothorac Surg* 2016;11(1):145 Online First.  
37  
38 125. Li J, Bai Y, Wang L, et al. Regulatory Effect of FK506 on CD152 and PD-1 in the  
39 Liver Allorecipients. *Transplant Proc* 2008;40(5):1495-97 Online First.  
40  
41 126. Li J, Liu B, Yan LN, et al. Reversal of graft steatosis after liver transplantation:  
42 prospective study. *Transplant Proc* 2009;41(9):3560-63 doi:  
43  
44 10.1016/j.transproceed.2009.06.222published Online First.  
45  
46  
47  
48  
49  
50  
51  
52  
53  
54  
55  
56  
57  
58  
59  
60

- 1  
2  
3 127. Li MR, Chen GH, Cai CJ, et al. High hepatitis B virus DNA level in serum before  
4 liver transplantation increases the risk of hepatocellular carcinoma recurrence.  
5 *Digestion* 2011;84(2):134-41 doi: 10.1159/000324197published Online First.  
6  
7  
8 128. Li N, Zhou J, Weng D, et al. Adjuvant adenovirus-mediated delivery of herpes  
9 simplex virus thymidine kinase administration improves outcome of liver  
10 transplantation in patients with advanced hepatocellular carcinoma. *Clin Cancer Res*  
11 2007;13(19):5847-54 Online First.  
12  
13  
14  
15 129. Li Q, Yao G, Ge Q, et al. Relevant risk factors affecting time of ventilation during  
16 early postoperative period after orthotopic liver transplantation. *J Crit Care*  
17 2010;25(2):221-24 doi: 10.1016/j.jcrc.2009.06.048published Online First.  
18  
19  
20 130. Li QY, Qin YS, Ling Q, et al. No therapeutic ERCP in anastomotic stricture without  
21 intrahepatic biliary dilation after liver transplantation. *Hepatogastroenterology*  
22 2011;58(109):1127-31 doi: 10.5754/hge11268published Online First.  
23  
24  
25 131. Li RD, Sun Z, Dong JY, et al. A quantitative assessment model of T-cell immune  
26 function for predicting risks of infection and rejection during the early stage after  
27 liver transplantation. *Clin Transplant* 2013;27(5):666-72 doi:  
28 10.1111/ctr.12187published Online First.  
29  
30  
31  
32 132. Li T, Chen ZS, Zeng FJ, et al. Impact of early biliary complications in liver  
33 transplantation in the presence or absence of a T-tube: A Chinese transplant centre  
34 experience. *Postgrad Med J* 2007;83(976):120-23 doi:  
35 10.1136/pgmj.2006.049171published Online First.  
36  
37  
38 133. Li W, Yuan G, Liu H, et al. Comparison of HPLC-MS/MS and enzyme-multiplied  
39 immunoassay in tacrolimus determination and its application in therapeutic drug  
40 monitoring. *Latin American Journal of Pharmacy* 2015;34(8):1540-46 Online First.  
41  
42  
43 134. Li WX, Li Z, Gao PJ, et al. Histological differentiation predicts post-liver  
44 transplantation survival time. *Clinics and Research in Hepatology and*  
45 *Gastroenterology* 2014;38(2):201-08 doi: 10.1016/j.clinre.2013.11.002published  
46 Online First.  
47  
48  
49  
50 135. Li X, Chi X, Luo G, et al. Ulinastatin ameliorates acute kidney injury following liver  
51 transplantation in rats and humans. *Exp Ther Med* 2015;9(2):411-16 Online First.  
52  
53  
54  
55  
56  
57  
58  
59  
60

- 1  
2  
3 136. Li X, Li X, Chi X, et al. Ulinastatin ameliorates acute kidney injury following liver  
4 transplantation in rats and humans. *Exp Ther Med* 2015;9(2):411-16 doi:  
5 10.3892/etm.2014.2088published Online First.  
6  
7  
8 137. Li Y, Shi Y, Chen J, et al. Association of polymorphisms in interleukin-18 and  
9 interleukin-28b with hepatitis b recurrence after liver transplantation in chinese han  
10 population. *Int J Immunogenet* 2012;39(4):346-52 doi: 10.1111/j.1744-  
11 313X.2012.01097.xpublished Online First.  
12  
13  
14 138. Li Y, Zhu M, Xia Q, et al. Urinary neutrophil gelatinase-associated lipocalin and L-  
15 type fatty acid binding protein as diagnostic markers of early acute kidney injury after  
16 liver transplantation. *Biomarkers* 2012;17(4):336-42 doi:  
17 10.3109/1354750X.2012.672458published Online First.  
18  
19  
20 139. Li Y, Zou Y, Cai B, et al. The associations of IL-18 serum levels and promoter  
21 polymorphism with tacrolimus pharmacokinetics and hepatic allograft dysfunction in  
22 Chinese liver transplantation recipients. *Gene* 2012;491(2):251-55 doi:  
23 10.1016/j.gene.2011.10.008published Online First.  
24  
25  
26 140. Liang TB, Bai XL, Li DL, et al. Early Postoperative hemorrhage requiring urgent  
27 surgical reintervention after orthotopic liver transplantation. *Transplant Proc*  
28 2007;39(5):1549-53 doi: 10.1016/j.transproceed.2007.01.080published Online First.  
29  
30  
31 141. Liang TB, Li DL, Liang L, et al. Intraoperative blood salvage during liver  
32 transplantation in patients with hepatocellular carcinoma: Efficiency of leukocyte  
33 depletion filters in the removal of tumor cells. *Transplantation* 2008;85(6):863-69 doi:  
34 10.1097/TP.0b013e3181671f2epublished Online First.  
35  
36  
37 142. Liang TB, Li JJ, Li DL, et al. Intraoperative blood salvage and leukocyte depletion  
38 during liver transplantation with bacterial contamination. *Clin Transplant*  
39 2010;24(2):265-72 doi: 10.1111/j.1399-0012.2009.01091.xpublished Online First.  
40  
41  
42 143. Lianghui G, Shusen Z, Tingbo L, et al. Deferred versus prophylactic therapy with  
43 gancyclovir for cytomegalovirus in allograft liver transplantation. *Transplant Proc*  
44 2004;36(5):1502-05 doi: 10.1016/j.transproceed.2004.04.079published Online First.  
45  
46  
47 144. Lin B, Geng L, Zheng Z, et al. The predictive value of blood neutrophil-lymphocyte  
48 ratio in patients with end-stage liver cirrhosis following ABO-incompatible liver  
49 transplantation. *J Res Med Sci* 2016;21(5):20-25 Online First.  
50  
51  
52  
53  
54  
55  
56  
57  
58  
59  
60

- 1  
2  
3 145. Lin MJ, Yang YL, Yu Q, et al. Value of percutaneous transhepatic cholangioscopy in  
4 the treatment of biliary cast after liver transplantation. *Int J Clin Exp Med*  
5 2016;9(2):1263-71 Online First.  
6  
7  
8 146. Lin XH, Teng S, Wang L, et al. Fatigue and its associated factors in liver transplant  
9 recipients in Beijing: A cross-sectional study. *BMJ Open* 2017;7 (2) Online First.  
10  
11  
12 147. Lin YH, Cai ZS, Jiang Y, et al. Perioperative risk factors for pulmonary  
13 complications after liver transplantation. *J Int Med Res* 2010;38(5):1845-55 Online  
14 First.  
15  
16  
17 148. Ling L, He X, Zeng J, et al. In-hospital cerebrovascular complications following  
18 orthotopic liver transplantation: a retrospective study. *BMC Neurol* 2008;8:52 Online  
19 First.  
20  
21  
22 149. Ling Q, Xie H, Li J, et al. Donor Graft MicroRNAs: A Newly Identified Player in the  
23 Development of New-onset Diabetes After Liver Transplantation. *Am J Transplant*  
24 2017;17(1):255-64 Online First.  
25  
26  
27 150. Ling Q, Xie H, Lu D, et al. Association between donor and recipient TCF7L2 gene  
28 polymorphisms and the risk of new-onset diabetes mellitus after liver transplantation  
29 in a Han Chinese population. *J Hepatol* 2013;58(2):271-77 doi:  
30 10.1016/j.jhep.2012.09.025 published Online First.  
31  
32  
33 151. Ling Q, Xu X, Li J, et al. A new serum cystatin C-based equation for assessing  
34 glomerular filtration rate in liver transplantation. *Clin Chem Lab Med*  
35 2008;46(3):405-10 doi: 10.1515/CCLM.2008.052 published Online First.  
36  
37  
38 152. Ling Q, Xu X, Wang K, et al. Donor PPAR $\gamma$  Gene polymorphisms influence the  
39 susceptibility to glucose and lipid disorders in liver transplant recipients. *medicine*  
40 (United States) 2015;94(35):e1421 doi: 10.1097/MD.0000000000001421 published  
41 Online First.  
42  
43  
44 153. Ling Q, Xu X, Wei Q, et al. Downgrading MELD improves the outcomes after liver  
45 transplantation in patients with acute-on-chronic hepatitis B liver failure. *PLoS One*  
46 2012;7(1) doi: 10.1371/journal.pone.0030322 published Online First.  
47  
48  
49 154. Ling Q, Xu X, Wei Q, et al. Impact of preexisting diabetes mellitus on outcome after  
50 liver transplantation in patients with hepatitis B virus-related liver disease. *Dig Dis*  
51 *Sci* 2011;56(3):889-93 doi: 10.1007/s10620-010-1358-3 published Online First.  
52  
53  
54  
55  
56  
57  
58  
59

- 1  
2  
3 155. Liu B, Teng F, Fu H, et al. Excessive intraoperative blood loss independently predicts  
4 recurrence of hepatocellular carcinoma after liver transplantation. *BMC Gastroenterol*  
5 2015;15(1) doi: 10.1186/s12876-015-0364-5published Online First.  
6  
7  
8 156. Liu C, Shang YF, Zhang XF, et al. Co-administration of grapefruit juice increases  
9 bioavailability of tacrolimus in liver transplant patients: A prospective study. *Eur J*  
10 *Clin Pharmacol* 2009;65(9):881-85 doi: 10.1007/s00228-009-0702-zpublished Online  
11 First.  
12  
13  
14  
15 157. Liu C, Tsai HL, Chin T, et al. Experience of surgical treatment for hepatoblastoma.  
16 *Formosan Journal of Surgery* 2016;49(2):56-62 Online First.  
17  
18 158. Liu CZ, Hu SY, Jin B, et al. Hemodialysis-induced hyperglycemia after liver  
19 transplantation. *Hepatogastroenterology* 2008;55(88):2175-77 Online First.  
20  
21  
22 159. Liu D, Huang P, Li X, et al. Using inflammatory and oxidative biomarkers in urine to  
23 predict early acute kidney injury in patients undergoing liver transplantation.  
24 *Biomarkers* 2014;19(5):424-29 doi: 10.3109/1354750X.2014.924997published  
25 Online First.  
26  
27  
28  
29 160. Liu D, Luo G, Luo C, et al. Changes in the concentrations of mediators of  
30 inflammation and oxidative stress in exhaled breath condensate during liver  
31 transplantation and their relations with postoperative ARDS. *Respir Care*  
32 2015;60(5):679-88 doi: 10.4187/respcare.03311published Online First.  
33  
34  
35 161. Liu J, Yan J, Wan Q, et al. The risk factors for tuberculosis in liver or kidney  
36 transplant recipients. *BMC Infect Dis* 2014;14(1) doi: 10.1186/1471-2334-14-  
37 387published Online First.  
38  
39  
40  
41 162. Liu S, Bai Y, Huang J, et al. Do mitochondria contribute to left ventricular non-  
42 compaction cardiomyopathy? New findings from myocardium of patients with left  
43 ventricular non-compaction cardiomyopathy. *Mol Genet Metab* 2013;109(1):100-06  
44 Online First.  
45  
46  
47  
48 163. Liu S, Fan J, Wang X, et al. Intraoperative cryoprecipitate transfusion and its  
49 association with the incidence of biliary complications after liver transplantation-a  
50 retrospective cohort study. *PLoS One* 2013;8(5) doi:  
51 10.1371/journal.pone.0060727published Online First.  
52  
53  
54  
55  
56  
57  
58  
59  
60

- 1  
2  
3 164. Liu S, Wang X, Lu Y, et al. The effects of intraoperative cryoprecipitate transfusion  
4 on acute renal failure following orthotopic liver transplantation. *Hepatology*  
5 *International* 2013;7(3):901-09 doi: 10.1007/s12072-013-9457-9published Online  
6 First.  
7  
8  
9  
10 165. Liu S, Xing T, Sheng T, et al. The reduction rate of serum C3 following liver  
11 transplantation is an effective predictor of non-anastomotic strictures. *Hepatology*  
12 *International* 2014;8(2):293-300 doi: 10.1007/s12072-014-9524-xpublished Online  
13 First.  
14  
15  
16  
17 166. Liu X, Wang B, Zhang X, et al. Liver transplantation using donation after brain and  
18 cardiac death: a single-center experience in China. *Transplant Proc* 2016;48(6):1879-  
19 86 Online First.  
20  
21  
22 167. Liu XX, Xu BM, Chen H, et al. limited sampling strategy for the estimation of  
23 tacrolimus area under the concentration-time curve in Chinese adult liver transplant  
24 patients. *Pharmacology* 2016;98(5-6):229-41 doi: 10.1159/000445896published  
25 Online First.  
26  
27  
28  
29 168. Liu Y, Liu YY, Li CP, et al. Comprehensive comparison of three different  
30 immunosuppressive regimens for liver transplant patients with hepatocellular  
31 carcinoma: Steroid-free immunosuppression, induction immunosuppression and  
32 standard immunosuppression. *PLoS One* 2015;10 (3) Online First.  
33  
34  
35  
36 169. Liu Y, Sun LY, Zhu ZJ, et al. Measles virus infection in pediatric liver transplantation  
37 recipients. *Transplant Proc* 2015;47(9):2715-8 Online First.  
38  
39  
40 170. Liu Z, Yu X, Ren W, et al. CD152 and PD-1 down-regulation on CD8 T cells is  
41 associated with human acute liver allograft rejection. *Transplant Proc*  
42 2014;46(10):3511-4 Online First.  
43  
44  
45 171. Liu ZN, Wang WT, Yan LN. De Novo malignancies after liver transplantation with  
46 14 cases at a single center. *Transplant Proc* 2015;47(8):2483-87 doi:  
47 10.1016/j.transproceed.2015.08.008published Online First.  
48  
49  
50 172. Lu D, Xu X, Wang J, et al. The influence of a contemporaneous portal and hepatic  
51 artery revascularization protocol on biliary complications after liver transplantation.  
52 *Surgery (United States)* 2014;155(1):190-95 doi:  
53 10.1016/j.surg.2013.06.056published Online First.  
54  
55  
56  
57  
58  
59

- 1  
2  
3 173. Lu H, He J, Wu Z, et al. Assessment of microbiome variation during the perioperative  
4 period in liver transplant patients: a retrospective analysis. *Microb Ecol*  
5 2013;65(3):781-91 doi: 10.1007/s00248-013-0211-6published Online First.  
6  
7  
8 174. Lu HW, Dong JH, Li CH, et al. The defects of cholangiocyte primary cilia in patients  
9 with graft cholangiopathies. *Clin Transplant* 2014;28(10):1202-08 Online First.  
10  
11 175. Lu NN, Huang Q, Wang JF, et al. Non-anastomotic biliary strictures following  
12 orthotopic liver transplantation: Treatment with percutaneous transhepatic biliary  
13 drainage. *Hepatogastroenterology* 2012;59(120):2569-72 doi:  
14 10.5754/hge12300published Online First.  
15  
16  
17 176. Lu Q, Zhong XF, Huang ZX, et al. Role of contrast-enhanced ultrasound in decision  
18 support for diagnosis and treatment of hepatic artery thrombosis after liver  
19 transplantation. *Eur J Radiol* 2012;81(3):e338-e43 doi:  
20 10.1016/j.ejrad.2011.11.015published Online First.  
21  
22  
23 177. Lu SC, Jiang T, Lai W, et al. Reestablishment of active immunity against HBV graft  
24 reinfection after liver transplantation for HBV-related end stage liver disease. *Journal*  
25 *of immunology research* 2014;2014:764234 Online First.  
26  
27  
28 178. Luo A, Wan Q, Ye Q, et al. The clinical manifestations and distribution and  
29 resistance of pathogens among liver transplantation with infections caused by non -  
30 Fermenters: A clinical analysis of 31 patients. *Hepatogastroenterology*  
31 2014;61(136):2349-52 doi: 10.5754/hge14849published Online First.  
32  
33  
34 179. Luo A, Zhong Z, Wan Q, et al. The distribution and resistance of pathogens among  
35 solid organ transplant recipients with *Pseudomonas aeruginosa* infections. *Med Sci*  
36 *Monit* 2016;22:1124-30 doi: 10.12659/MSM.896026published Online First.  
37  
38  
39 180. Luo XJ, Wang W, Hu SS, et al. Extracorporeal membrane oxygenation for treatment  
40 of cardiac failure in adult patients. *Interact Cardiovasc Thorac Surg* 2009;9(2):296-  
41 300 Online First.  
42  
43  
44 181. Luo YL, Yang XL, Cui JB, et al. Health-related quality of life of liver transplant  
45 recipients: A single center experience. *Hepatogastroenterology* 2012;59(118):1947-50  
46 doi: 10.5754/hge12008published Online First.  
47  
48  
49 182. Lv Z, Cai X, Weng X, et al. Tumor-stroma ratio is a prognostic factor for survival in  
50 hepatocellular carcinoma patients after liver resection or transplantation. *Surgery*  
51  
52  
53  
54  
55  
56  
57  
58  
59  
60

- 1  
2  
3 (United States) 2015;158(1):142-50 doi: 10.1016/j.surg.2015.02.013published Online  
4 First.  
5  
6  
7 183. Lv Z, Weng X, Du C, et al. Downregulation of HDAC6 promotes angiogenesis in  
8 hepatocellular carcinoma cells and predicts poor prognosis in liver transplantation  
9 patients. *Mol Carcinog* 2016;55(5):1024-33 doi: 10.1002/mc.22345published Online  
10 First.  
11  
12  
13 184. Lyu SQ, Ren J, Zheng RQ, et al. Contrast-enhanced sonography for diagnosing  
14 collateral transformation of the hepatic artery after liver transplantation. *J Ultrasound*  
15 *Med* 2015;34(9):1591-98 doi: 10.7863/ultra.15.14.08079published Online First.  
16  
17  
18 185. Mao W, Chen J, Zheng M, et al. Initial experience of lung transplantation at a single  
19 center in China. *Transplant Proc* 2013;45(1):349-55 doi:  
20 10.1016/j.transproceed.2012.02.045published Online First.  
21  
22  
23 186. Mao W, Hu Y, Lou Y, et al. Immature platelet fraction values predict recovery of  
24 platelet counts following liver transplantation. *Clinics and Research in Hepatology*  
25 *and Gastroenterology* 2015;39(4):469-74 doi: 10.1016/j.clinre.2014.11.008published  
26 Online First.  
27  
28  
29 187. Mao WJ, Chen JY, Zheng MF, et al. Lung transplantation for end-stage silicosis. *J*  
30 *Occup Environ Med* 2011;53(8):845-49 doi:  
31 10.1097/JOM.0b013e3182260e50published Online First.  
32  
33  
34 188. Men TY, Wang JN, Li H, et al. Prevalence of multidrug-resistant gram-negative  
35 bacilli producing extended-spectrum  $\beta$ -lactamases (ESBLs) and ESBL genes in solid  
36 organ transplant recipients. *Transpl Infect Dis* 2013;15(1):14-21 doi:  
37 10.1111/tid.12001published Online First.  
38  
39  
40 189. Meng X, Chen X, Wu L, et al. The hyperlipidemia caused by overuse of  
41 glucocorticoid after liver transplantation and the immune adjustment strategy. *Journal*  
42 *of Immunology Research* 2017;2017 Online First.  
43  
44  
45 190. Minmin S, Zhidong G, Hao C, et al. Correlation between pharmacokinetics and  
46 pharmacodynamics of mycophenolic acid in liver transplant patients. *J Clin*  
47 *Pharmacol* 2010;50(12):1388-96 doi: 10.1177/0091270009359526published Online  
48 First.  
49  
50  
51  
52  
53  
54  
55  
56  
57  
58  
59  
60



- 1  
2  
3 191. Mu HJ, Xie P, Chen JY, et al. Association of TNF- $\alpha$ , TGF- $\beta$ 1, IL-10, IL-6, and IFN- $\gamma$   
4 gene polymorphism with acute rejection and infection in lung transplant recipients.  
5 Clin Transplant 2014;28(9):1016-24 doi: 10.1111/ctr.12411published Online First.  
6  
7  
8 192. Niu Y, Chen X, Feng L, et al. Anti-HBc-positive/HBsAg-negative liver donors pose a  
9 higher risk of occult HBV infection but do not cause severe histological damage in  
10 liver grafts. Clinics and Research in Hepatology and Gastroenterology  
11 2014;38(4):475-80 Online First.  
12  
13  
14 193. Niu YJ, Shen ZY, Xu C, et al. Establishment of tacrolimus-induced diabetes in rat  
15 model and assessment of clinical treatments for post-transplant diabetes mellitus in  
16 liver transplant recipients. Clinical Laboratory 2013;59(7-8):869-74 doi:  
17 10.7754/Clin.Lab.2012.120913published Online First.  
18  
19  
20 194. Pan C, Shi Y, Zhang JJ, et al. Single-center experience of 253 portal vein thrombosis  
21 patients undergoing liver transplantation in China. Transplant Proc 2009;41(9):3761-  
22 65 doi: 10.1016/j.transproceed.2009.06.215published Online First.  
23  
24  
25 195. Pan C, Wang C, Pan W, et al. Usefulness of real-time three-dimensional  
26 echocardiography to quantify global left ventricular function and mechanical  
27 dyssynchrony after heart transplantation. Acta Cardiol 2011;66(3):365-70 doi:  
28 10.2143/AC.66.3.2114137published Online First.  
29  
30  
31 196. Pan L, Zhang W, Zhang J, et al. The analysis of CD45 isoforms expression on HBV-  
32 specific T cells after liver transplantation. Med Oncol 2012;29(2):899-908 doi:  
33 10.1007/s12032-011-9833-zpublished Online First.  
34  
35  
36 197. Pei F, Shang K, Jiang B, et al. Clinicopathologic study on complications of orthotopic  
37 liver transplantation in 54 patients with chronic hepatitis B viral infection.  
38 Hepatology International 2013;7(2):468-76 doi: 10.1007/s12072-013-9422-  
39 7published Online First.  
40  
41  
42 198. Peng C, Zhang Z, Wu J, et al. A critical role for ZDHHC2 in metastasis and  
43 recurrence in human hepatocellular carcinoma. BioMed Research International  
44 2014;2014 Online First.  
45  
46  
47 199. Qiao B, Wu J, Wan Q, et al. Factors influencing mortality in abdominal solid organ  
48 transplant recipients with multidrug-resistant gram-negative bacteremia. BMC Infect  
49 Dis 2017;17 (1) Online First.  
50  
51  
52  
53  
54  
55  
56  
57  
58  
59  
60

- 1  
2  
3 200. Qin J, Fang Y, Dong Y, et al. Radiological and clinical findings of 25 patients with  
4 invasive pulmonary aspergillosis: Retrospective analysis of 2150 liver transplantation  
5 cases. *Br J Radiol* 2012;85(1016):e429-e35 doi: 10.1259/bjr/39784231published  
6 Online First.  
7  
8  
9  
10 201. Qin J, Xu J, Dong Y, et al. High-resolution CT findings of pulmonary infections after  
11 orthotopic liver transplantation in 453 patients. *Br J Radiol* 2012;85(1019):e959-e65  
12 doi: 10.1259/bjr/26230943published Online First.  
13  
14  
15 202. Qin Z, Linghu EQ. New endoscopic classification system for biliary stricture after  
16 liver transplantation. *J Int Med Res* 2014;42(2):566-71 doi:  
17 10.1177/0300060513507761published Online First.  
18  
19  
20 203. Qiu Y, Zhu X, Wang W, et al. Nutrition support with glutamine dipeptide in patients  
21 undergoing liver transplantation. *Transplant Proc* 2009;41(10):4232-37 doi:  
22 10.1016/j.transproceed.2009.08.076published Online First.  
23  
24  
25 204. Qu W, Zhu ZJ, Sun LY, et al. Correlation between immunosuppressive therapy and  
26 CD4<sup>+</sup> T-Cell intracellular adenosine triphosphate levels in liver  
27 transplant recipients. *Transplant Proc* 2016;48(6):2094-97 Online First.  
28  
29  
30 205. Qu W, Zhu ZJ, Sun LY, et al. Correlation between survival interval and  
31 CD4<sup>+</sup> T-Cell intracellular ATP levels in liver transplant recipients.  
32 *Transplant Proc* 2017;49(2):316-21 Online First.  
33  
34  
35 206. Qu W, Zhu ZJ, Sun LY, et al. Salvage liver transplantation for hepatocellular  
36 carcinoma recurrence after primary liver resection. *Clinics and Research in*  
37 *Hepatology and Gastroenterology* 2015;39(1):93-97 doi:  
38 10.1016/j.clinre.2014.07.006published Online First.  
39  
40  
41 207. Ran JH, Zhang SN, Liu J, et al. In-hospital and follow-up outcomes of patients  
42 undergoing orthotopic liver transplantation after hepatic artery reconstruction with an  
43 iliac interposition graft. *Int J Clin Exp Med* 2016;9(2):3939-45 Online First.  
44  
45  
46 208. Ren J, Lu MD, Zheng RQ, et al. Evaluation of the microcirculatory disturbance of  
47 biliary ischemia after liver transplantation with contrast-enhanced ultrasound:  
48 Preliminary experience. *Liver Transpl* 2009;15(12):1703-08 doi:  
49 10.1002/lt.21910published Online First.  
50  
51  
52  
53  
54  
55  
56  
57  
58  
59

- 1  
2  
3 209. Ren J, Zheng BW, Wang P, et al. Revealing impaired blood supply to the bile ducts  
4 on contrast-enhanced ultrasound: a novel diagnosis method to ischemic-type biliary  
5 lesions after orthotopic liver transplantation. *Ultrasound Med Biol* 2013;39(5):753-  
6 60 doi: 10.1016/j.ultrasmedbio.2012.12.004published Online First.  
7  
8  
9  
10 210. Ren L, Teng M, Zhang T, et al. Donors FMO3 polymorphisms affect tacrolimus  
11 elimination in Chinese liver transplant patients. *Pharmacogenomics* 2017;18(3):265-  
12 75 Online First.  
13  
14  
15 211. Ren QQ, Fu SJ, Zhao Q, et al. Prognostic value of preoperative peripheral monocyte  
16 count in patients with hepatocellular carcinoma after liver transplantation. *Tumor*  
17 *Biology* 2016;37(7):8973-78 Online First.  
18  
19  
20 212. Ren X, Guan J, Gao N, et al. Evaluation of pediatric liver transplantation-related  
21 artery complications using intra-operative multi-parameter ultrasonography. *Med Sci*  
22 *Monit* 2016;22:4495-502 Online First.  
23  
24  
25 213. Ren X, Luo Y, Gao N, et al. Common ultrasound and contrast-enhanced  
26 ultrasonography in the diagnosis of hepatic artery pseudoaneurysm after liver  
27 transplantation. *Exp Ther Med* 2016;12(2):1029-33 Online First.  
28  
29  
30 214. Sha J, Tao Y, Li D, et al. Outcome of heart transplantations done in our centre. *Ann*  
31 *Transplant* 2008;13(3):27-29 Online First.  
32  
33  
34 215. Shan Y, Shen N, Han L, et al. MicroRNA-499 Rs3746444 polymorphism and biliary  
35 atresia. *Dig Liver Dis* 2016;48(4):423-28 Online First.  
36  
37  
38 216. Shaoyin D, Yongmei Y, Tong S, et al. Follow-up examination of 12 heart transplant  
39 recipients with cardiac CT. *Clin Imaging* 2012;36(6):732-38 doi:  
40 10.1016/j.clinimag.2012.02.004published Online First.  
41  
42  
43 217. Shen C, Peng C, Shen B, et al. Sirolimus and metformin synergistically inhibit  
44 hepatocellular carcinoma cell proliferation and improve long-term survival in patients  
45 with HCC related to hepatitis B virus induced cirrhosis after liver transplantation.  
46 *Oncotarget* 2016;7(38):62647-56 Online First.  
47  
48  
49 218. Shen JY, Li C, Wen TF, et al. Liver transplantation versus surgical resection for CC  
50 meeting the Milan criteria: A propensity score analysis. *Medicine (United States)*  
51 2016;95(52) doi: 10.1097/MD.0000000000005756published Online First.  
52  
53  
54  
55  
56  
57  
58  
59  
60

- 1  
2  
3 219. Shen Z, Zhu Z, Zhang Y, et al. Liver transplantation at Tianjin First Central Hospital.  
4 Clin Transpl 2005;221-23 Online First.  
5  
6 220. Shen ZY, Zheng WP, Deng YL, et al. Variations in the S and P regions of the  
7 hepatitis B virus genome under immunosuppression in vitro and in vivo. Viral  
8 Immunol 2012;25(5):368-78 Online First.  
9  
10 221. Sheng H, Lu Y, Chen H. Ocular complications of heart transplantation in a Chinese  
11 population. Transplant Proc 2008;40(10):3590-93 doi:  
12 10.1016/j.transproceed.2008.06.081published Online First.  
13  
14 222. Sheng L, Jun S, Jianfeng L, et al. The effect of sirolimus-based immunosuppression  
15 vs. conventional prophylaxis therapy on cytomegalovirus infection after liver  
16 transplantation. Clin Transplant 2015;29(6):555-59 doi: 10.1111/ctr.12552published  
17 Online First.  
18  
19 223. Shi F, Zhang JY, Zeng Z, et al. Skewed ratios between CD3<sup>+</sup> T cells  
20 and monocytes are associated with poor prognosis in patients with HBV-related  
21 acute-on-chronic liver failure. Biochem Biophys Res Commun 2010;402(1):30-36  
22 Online First.  
23  
24 224. Shi R, Shen ZY, Teng da H, et al. Gallstones in liver transplant recipients: A single-  
25 center study in China. Turkish Journal of Gastroenterology 2015;26(5):429-34 Online  
26 First.  
27  
28 225. Shi SH, Kong HS, Jia CK, et al. Risk factors for pneumonia caused by multidrug-  
29 resistant Gram-negative bacilli among liver recipients. Clin Transplant  
30 2010;24(6):758-65 Online First.  
31  
32 226. Shi SH, Kong HS, Xu J, et al. Multidrug resistant gram-negative bacilli as  
33 predominant bacteremic pathogens in liver transplant recipients. Transpl Infect Dis  
34 2009;11(5):405-12 doi: 10.1111/j.1399-3062.2009.00421.xpublished Online First.  
35  
36 227. Shi Y, Li Y, Tang J, et al. Influence of CYP3A4, CYP3A5 and MDR-1  
37 polymorphisms on tacrolimus pharmacokinetics and early renal dysfunction in liver  
38 transplant recipients. Gene 2013;512(2):226-31 doi:  
39 10.1016/j.gene.2012.10.048published Online First.  
40  
41  
42  
43  
44  
45  
46  
47  
48  
49  
50  
51  
52  
53  
54  
55  
56  
57  
58  
59  
60

- 1  
2  
3 228. Shi Z, Yan L, Zhao J, et al. Prevention and treatment of rethrombosis after liver  
4 transplantation with an implantable pump of the portal vein. *Liver Transpl*  
5 2010;16(3):324-31 doi: 10.1002/lt.21988published Online First.  
6  
7  
8 229. Song SH, Li XX, Wan QQ, et al. Risk factors for mortality in liver transplant  
9 recipients with ESKAPE infection. *Transplant Proc* 2014;46(10):3560-63 doi:  
10 10.1016/j.transproceed.2014.08.049published Online First.  
11  
12  
13 230. Su H, Liu Z, Sun Y, et al. Efficacy and safety of low accelerating dose regimen of  
14 interferon/ribavirin antiviral therapy in patients with hepatitis C virus recurrence after  
15 liver transplantation. *Ann Transplant* 2015;20:263-68 doi:  
16 10.12659/AOT.892255published Online First.  
17  
18  
19 231. Su H, Ye Q, Wan Q, et al. Predictors of mortality in abdominal organ transplant  
20 recipients with pseudomonas aeruginosa infections. *Ann Transplant* 2016;21 Online  
21 First.  
22  
23  
24 232. Sun B, Li XY, Gao JW, et al. Population pharmacokinetic study of cyclosporine  
25 based on NONMEM in Chinese liver transplant recipients. *Ther Drug Monit*  
26 2010;32(6):715-22 doi: 10.1097/FTD.0b013e3181fb6ce3published Online First.  
27  
28  
29 233. Sun H, Teng M, Liu J, et al. FOXM1 expression predicts the prognosis in  
30 hepatocellular carcinoma patients after orthotopic liver transplantation combined with  
31 the Milan criteria. *Cancer Lett* 2011;306(2):214-22 doi:  
32 10.1016/j.canlet.2011.03.009published Online First.  
33  
34  
35 234. Sun J, Cao G, Zhang L, et al. Human cytomegalovirus (CMV) UL97 D605E mutation  
36 has a higher prevalence in infants with primary CMV infection compared with  
37 transplant recipients with CMV recurrence. *Transplant Proc* 2012;44(10):3022-25 doi:  
38 10.1016/j.transproceed.2012.06.069published Online First.  
39  
40  
41 235. Sun XY, Dong JH, Qin K, et al. Single center study on transplantation of livers  
42 donated after cardiac death: A report of 6 cases. *Exp Ther Med* 2016;11(3):988-92  
43 doi: 10.3892/etm.2016.3001published Online First.  
44  
45  
46 236. Sun Y, Yin S, Xie H, et al. Immunophenotypic shift of memory CD8 T cells  
47 identifies the changes of immune status in the patients after liver transplantation.  
48 *Scand J Clin Lab Invest* 2009;69(7):789-96 doi:  
49 10.3109/00365510903268818published Online First.  
50  
51  
52  
53  
54  
55  
56  
57  
58  
59  
60

- 1  
2  
3 237. Teng da H, Zhu ZJ, Zheng H, et al. Effect of steatosis donor liver transplantation on  
4 hepatocellular carcinoma recurrence: experience at a single institution.  
5 Hepatogastroenterology 2012;59(115):858-62 Online First.  
6  
7  
8 238. Teng F, Han QC, Ding GS, et al. Validation of a criteria-specific long-term survival  
9 prediction model for hepatocellular carcinoma patients after liver transplantation. Sci  
10 Rep 2015;5:11733 Online First.  
11  
12  
13 239. Tu Z, Xiang P, Xu X, et al. DCD liver transplant infection: Experience from a single  
14 centre in China. Int J Clin Pract 2016;70:3-10 doi: 10.1111/ijcp.12810published  
15 Online First.  
16  
17  
18 240. Vitale A, Cucchetti A, Qiao GL, et al. Is resectable hepatocellular carcinoma a  
19 contraindication to liver transplantation? A novel decision model based on "number  
20 of patients needed to transplant" as measure of transplant benefit. J Hepatol  
21 2014;60(6):1165-71 doi: 10.1016/j.jhep.2014.01.022published Online First.  
22  
23  
24 241. Wan P, Xia Q, Zhang JJ, et al. Liver transplantation for hepatocellular carcinoma  
25 exceeding the Milan criteria: A single-center experience. J Cancer Res Clin Oncol  
26 2014;140(2):341-48 doi: 10.1007/s00432-013-1576-0published Online First.  
27  
28  
29 242. Wan P, Zhang J, Long X, et al. Serum levels of preoperative  $\alpha$ -fetoprotein and CA19-  
30 9 predict survival of hepatic carcinoma patients after liver transplantation. Eur J  
31 Gastroenterol Hepatol 2014;26(5):553-61 doi:  
32 10.1097/MEG.000000000000070published Online First.  
33  
34  
35 243. Wan Q, Ye Q, Su T, et al. The epidemiology and distribution of pathogens and risk  
36 factors for mortality in liver transplant recipients with gram negative bacteremia.  
37 Hepatogastroenterology 2014;61(134):1730-33 doi: 10.5754/hge14504published  
38 Online First.  
39  
40  
41 244. Wan QQ, Ye QF, Ming YZ, et al. The risk factors for mortality in deceased donor  
42 liver transplant recipients with bloodstream infections. Transplant Proc  
43 2013;45(1):305-07 doi: 10.1016/j.transproceed.2012.06.080published Online First.  
44  
45  
46 245. Wang B, He HK, Cheng B, et al. Effect of low central venous pressure on  
47 postoperative pulmonary complications in patients undergoing liver transplantation.  
48 Surg Today 2013;43(7):777-81 doi: 10.1007/s00595-012-0419-ypublished Online  
49  
50  
51  
52  
53  
54  
55  
56  
57  
58  
59  
60

- 1  
2  
3 246. Wang C, Wang G, Yi H, et al. Symptom experienced three years after liver  
4 transplantation under immunosuppression in adults.[Erratum appears in PLoS One.  
5 2013;8(12). doi:10.1371/annotation/161a6145-d670-408a-a9fc-a1107b57724a]. PLoS  
6 ONE [Electronic Resource] 2013;8(11):e80584 Online First.  
7  
8  
9  
10 247. Wang CM, Li X, Song S, et al. Newly designed y-configured single-catheter stenting  
11 for the treatment of hilar-type nonanastomotic biliary strictures after orthotopic liver  
12 transplantation. *Cardiovasc Intervent Radiol* 2012;35(1):184-89 doi: 10.1007/s00270-  
13 011-0214-y published Online First.  
14  
15  
16  
17 248. Wang E, Nie Y, Zhao Q, et al. Circulating miRNAs reflect early myocardial injury  
18 and recovery after heart transplantation. *J Cardiothorac Surg* 2013;8(1) doi:  
19 10.1186/1749-8090-8-165 published Online First.  
20  
21  
22 249. Wang G, Yang J, Li M, et al. Liver transplant may improve erectile function in  
23 patients with benign end-stage liver disease: Single-center Chinese experience. *Exp*  
24 *Clin Transplant* 2013;11(4):332-38 doi: 10.6002/ect.2012.0102 published Online First.  
25  
26  
27 250. Wang GY, Jiang N, Yi HM, et al. Pretransplant elevated plasma fibrinogen level is a  
28 novel prognostic predictor for hepatocellular carcinoma recurrence and patient  
29 survival following liver transplantation. *Ann Transplant* 2016;21:125-30 doi:  
30 10.12659/AOT.895416 published Online First.  
31  
32  
33  
34 251. Wang GY, Li H, Liu W, et al. Elevated blood eosinophil count is a valuable  
35 biomarker for predicting late acute cellular rejection after liver transplantation.  
36 *Transplant Proc* 2013;45(3):1198-200 Online First.  
37  
38  
39 252. Wang GY, Yang Y, Li H, et al. A scoring model based on neutrophil to lymphocyte  
40 ratio predicts recurrence of HBV-associated hepatocellular carcinoma after liver  
41 transplantation. *PLoS One* 2011;6(9) doi: 10.1371/journal.pone.0025295 published  
42 Online First.  
43  
44  
45  
46 253. Wang J, Liu JJ, Liang YY, et al. Could diffusion-weighted imaging detect injured bile  
47 ducts of ischemic-type biliary lesions after orthotopic liver transplantation? *American*  
48 *Journal of Roentgenology* 2012;199(4):901-06 doi: 10.2214/AJR.11.8147 published  
49 Online First.  
50  
51  
52  
53  
54  
55  
56  
57  
58  
59  
60

- 1  
2  
3 254. Wang J, Yang W, Huang Q, et al. Interventional treatment for portal venous  
4 occlusion after liver transplantation: Long-term follow-up results. *Medicine (United*  
5 *States)* 2015;94(4) doi: 10.1097/MD.0000000000000356published Online First.  
6  
7  
8 255. Wang JF, Zhai RY, Wei BJ, et al. Percutaneous intravascular stents for treatment of  
9 portal venous stenosis after liver transplantation: midterm results. *Transplant Proc*  
10 2006;38(5):1461-62 doi: 10.1016/j.transproceed.2006.02.113published Online First.  
11  
12  
13 256. Wang K, Zhu ZJ, Zheng H, et al. Protective hepatitis B surface antibodies in blood  
14 and ascites fluid in the early stage after liver transplantation for hepatitis B diseases.  
15 *Hepatology Research* 2012;42(3):280-87 doi: 10.1111/j.1872-  
16 034X.2011.00926.xpublished Online First.  
17  
18  
19  
20 257. Wang L, Li N, Wang MX, et al. Benefits of minimizing immunosuppressive dosage  
21 according to cytochrome P450 3A5 genotype in liver transplant patients: Findings  
22 from a single-center study. *Genetics and Molecular Research* 2015;14(2):3191-99 doi:  
23 10.4238/2015.April.10.31published Online First.  
24  
25  
26  
27 258. Wang L, Zang Y, Lu S, et al. Efficacy of sirolimus on ischemic-type biliary lesions  
28 after liver transplantation. *Int J Clin Exp Med* 2017;10(1):1151-55 Online First.  
29  
30  
31 259. Wang LJ, Liu ZR, Zhang YM, et al. Clinical analysis of liver transplantation for  
32 benign liver tumor. *Int J Clin Exp Med* 2016;9(11):22691-95 Online First.  
33  
34  
35 260. Wang P, Li H, Shi B, et al. Prognostic factors in patients with recurrent hepatocellular  
36 carcinoma treated with salvage liver transplantation: A singlecenter study. *Oncotarget*  
37 2016;7(23):35071-83 Online First.  
38  
39  
40 261. Wang P, Song W, Li H, et al. Association between donor and recipient smoothed  
41 gene polymorphisms and the risk of hepatocellular carcinoma recurrence following  
42 orthotopic liver transplantation in a Han Chinese population. *Tumor Biology*  
43 2015;36(10):7807-15 doi: 10.1007/s13277-015-3370-xpublished Online First.  
44  
45  
46 262. Wang P, Wang C, Li H, et al. Impact of age on the prognosis after liver  
47 transplantation for patients with hepatocellular carcinoma: A single-center experience.  
48 *Onco Targets Ther* 2015;8:3775-81 doi: 10.2147/OTT.S93939published Online First.  
49  
50  
51 263. Wang PL, Wang J, Zhou Y, et al. Expression of programmed death-1 and its ligands  
52 in the liver of biliary atresia. *World J Pediatr* 2017:1-7 Online First.  
53  
54  
55  
56  
57  
58  
59



- 1  
2  
3 264. Wang S, Li J, Xie A, et al. Dynamic changes in Th1, Th17, and FoxP3+ T cells in  
4 patients with acute cellular rejection after cardiac transplantation. *Clin Transplant*  
5 2011;25(2):E177-E86 doi: 10.1111/j.1399-0012.2010.01362.xpublished Online First.  
6  
7  
8 265. Wang SY, Tang HM, Chen GQ, et al. Effect of ursodeoxycholic acid administration  
9 after liver transplantation on serum liver tests and biliary complications: A  
10 randomized clinical trial. *Digestion* 2012;86(3):208-17 doi:  
11 10.1159/000339711published Online First.  
12  
13  
14  
15 266. Wang W, Ye Y, Wang T, et al. Prognostic prediction of male recipients selected for  
16 liver transplantation: With special attention to neutrophil to lymphocyte ratio.  
17 *Hepatology Research* 2016;46(9):899-907 doi: 10.1111/hepr.12633published Online  
18 First.  
19  
20  
21  
22 267. Wang WL, Jin J, Zheng SS, et al. Tacrolimus dose requirement in relation to donor  
23 and recipient ABCB1 and CYP3A5 gene polymorphisms in Chinese liver transplant  
24 patients. *Liver Transpl* 2006;12(5):775-80 doi: 10.1002/lt.20709published Online  
25 First.  
26  
27  
28  
29 268. Wang Y, Liu Y, Han R, et al. Hemostatic variation during perioperative period of  
30 orthotopic liver transplantation without venovenous bypass. *Thromb Res*  
31 2008;122(2):161-66 doi: 10.1016/j.thromres.2007.10.002published Online First.  
32  
33  
34 269. Wang Y, Liu Y, Han R, et al. Monitoring of CD95 and CD38 expression in peripheral  
35 blood T lymphocytes during active human cytomegalovirus infection after orthotopic  
36 liver transplantation. *Journal of Gastroenterology and Hepatology (Australia)*  
37 2010;25(1):138-42 doi: 10.1111/j.1440-1746.2009.05966.xpublished Online First.  
38  
39  
40  
41 270. Wang Y, Liu Y, Han R, et al. Temporal evolution of soluble Fas and Fas ligand in  
42 patients with orthotopic liver transplantation. *Cytokine* 2008;41(3):240-43 doi:  
43 10.1016/j.cyto.2007.11.010published Online First.  
44  
45  
46 271. Wang Y, Liu Y, Zhang Y, et al. The role of the CD95, CD38 and TGF $\beta$ 1 during  
47 active human cytomegalovirus infection in liver transplantation. *Cytokine* 2006;35(3-  
48 4):193-99 doi: 10.1016/j.cyto.2006.08.001published Online First.  
49  
50  
51 272. Wang Y, Shen Z, Zhu Z, et al. Clinical values of AFP, GPC3 mRNA in peripheral  
52 blood for prediction of hepatocellular carcinoma recurrence following OLT. *Hepatitis*  
53 *Monthly* 2011;11(3):195-99 Online First.  
54  
55  
56  
57  
58  
59  
60

- 1  
2  
3 273. Wang Y, Zhang M, Liu ZW, et al. The ratio of circulating regulatory T cells  
4 (Tregs)/Th17 cells is associated with acute allograft rejection in liver transplantation.  
5 PLoS One 2014;9(11) doi: 10.1371/journal.pone.0112135published Online First.  
6  
7  
8 274. Wang YI, Li G, Zhang Y, et al. The expression of von Willebrand factor, soluble  
9 thrombomodulin, and soluble p-selectin during orthotopic liver transplantation.  
10 Transplant Proc 2007;39(1):172-75 doi:  
11 10.1016/j.transproceed.2006.10.027published Online First.  
12  
13  
14  
15 275. Wang YL, Li G, Wu D, et al. Analysis of alpha-fetoprotein mRNA level on the tumor  
16 cell hematogenous spread of patients with hepatocellular carcinoma undergoing  
17 orthotopic liver transplantation. Transplant Proc 2007;39(1):166-68 doi:  
18 10.1016/j.transproceed.2006.10.008published Online First.  
19  
20  
21  
22 276. Wang YL, Tang ZQ, Gao W, et al. Influence of Th1, Th2, and Th3 cytokines during  
23 the early phase after liver transplantation. Transplant Proc 2003;35(8):3024-25 doi:  
24 10.1016/j.transproceed.2003.10.007published Online First.  
25  
26  
27  
28 277. Wang YL, Zhang YY, Zhou YL, et al. T-helper and T-cytotoxic cell subsets  
29 monitoring during active cytomegalovirus infection in liver transplantation.  
30 Transplant Proc 2004;36(5):1498-99 doi:  
31 10.1016/j.transproceed.2004.05.032published Online First.  
32  
33  
34 278. Wang Z, Gong W, Shou D, et al. Clonal origin of hepatocellular carcinoma and  
35 recurrence after liver transplantation. Ann Transplant 2016;21:484-90 Online First.  
36  
37  
38 279. Wang Z, He JJ, Liu XY, et al. The evaluation of enteric-coated mycophenolate  
39 sodium in cardiac deceased donor liver transplant patients in China.  
40 Immunopharmacol Immunotoxicol 2015;37(6):508-12 doi:  
41 10.3109/08923973.2015.1096286published Online First.  
42  
43  
44 280. Wang Z, Liao J, Wu S, et al. Recipient C6 rs9200 genotype is associated with  
45 hepatocellular carcinoma recurrence after orthotopic liver transplantation in a Han  
46 Chinese population. Cancer Gene Ther 2016;23(6):157-61 doi:  
47 10.1038/cgt.2016.7published Online First.  
48  
49  
50  
51 281. Wang Z, Shi B, Jin H, et al. Low-dose of tacrolimus favors the induction of  
52 functional CD4+CD25+FoxP3+ regulatory T cells in solid-organ transplantation. Int  
53  
54  
55  
56  
57  
58  
59  
60

- 1  
2  
3 Immunopharmacol 2009;9(5):564-69 doi: 10.1016/j.intimp.2009.01.029published  
4 Online First.  
5  
6  
7 282. Wang Z, Wu S, Chen D, et al. Influence of TLR4 rs1927907 locus polymorphisms on  
8 tacrolimus pharmacokinetics in the early stage after liver transplantation. *Eur J Clin*  
9 *Pharmacol* 2014;70(8):925-31 doi: 10.1007/s00228-014-1673-2published Online First.  
10  
11 283. Wang ZX, Fu ZR, Ding GS, et al. Prevention of hepatitis B virus reinfection after  
12 orthotopic liver transplantation. *Transplant Proc* 2004;36(8):2315-7 Online First.  
13  
14 284. Wang ZX, Song SH, Teng F, et al. A single-center retrospective analysis of liver  
15 transplantation on 255 patients with hepatocellular carcinoma. *Clin Transplant*  
16 2010;24(6):752-57 doi: 10.1111/j.1399-0012.2009.01172.xpublished Online First.  
17  
18 285. Wang ZX, Yan LN, Wang WT, et al. Impact of pretransplant MELD score on  
19 posttransplant outcome in orthotopic liver transplantation for patients with acute-on-  
20 chronic hepatitis b liver failure. *Transplant Proc* 2007;39(5):1501-04 doi:  
21 10.1016/j.transproceed.2007.02.070published Online First.  
22  
23 286. Wei Q, Xu X, Wang C, et al. Efficacy and safety of a steroid-free immunosuppressive  
24 regimen after liver transplantation for hepatocellular carcinoma. *Gut and Liver*  
25 2016;10(4):604-10 doi: 10.5009/gnl15017published Online First.  
26  
27 287. Wei Y, Zhang L, Lin H, et al. Factors related to post-liver transplantation acute renal  
28 failure. *Transplant Proc* 2006;38(9):2982-84 doi:  
29 10.1016/j.transproceed.2006.08.156published Online First.  
30  
31 288. Wei YJ, Huang YX, Zhang XL, et al. Apolipoprotein D as a novel marker in human  
32 end-stage heart failure: A preliminary study. *Biomarkers* 2008;13(5):535-48 Online  
33 First.  
34  
35 289. Wei-lin W, Jing J, Shu-sen Z, et al. Tacrolimus dose requirement in relation to donor  
36 and recipient ABCB1 and CYP3A5 gene polymorphisms in Chinese liver transplant  
37 patients. *Liver Transpl* 2006;12(5):775-80 Online First.  
38  
39 290. Wen O, Li X, Wan Q, et al. The risk factors for mortality and septic shock in liver  
40 transplant recipients with ESKAPE bacteremia. *Hepatology*  
41 2015;62(138):246-49 doi: 10.5754/hge14092published Online First.  
42  
43 291. Wu B, Wu H, Chen J, et al. Comparative proteomic analysis of human donor tissues  
44 during orthotopic liver transplantation: Ischemia versus reperfusion. *Hepatology*  
45  
46  
47  
48  
49  
50  
51  
52  
53  
54  
55  
56  
57  
58  
59  
60

- 1  
2  
3 International 2013;7(1):286-98 doi: 10.1007/s12072-012-9346-7published Online  
4 First.  
5  
6  
7 292. Wu CZ, Ni XJ, Zheng SL, et al. A fast SSP-PCR method for genotyping the ATP-  
8 binding cassette subfamily B member 1 gene C3435T and G2677T polymorphisms in  
9 Chinese transplant recipients. *Tumori* 2009;95(3):338-42 Online First.  
10  
11 293. Wu D, Shen ZY, Zhang YM, et al. Effect of liver transplantation in combined  
12 hepatocellular and cholangiocellular carcinoma: A case series. *BMC Cancer* 2015;15  
13 (1) Online First.  
14  
15 294. Wu J, Xu X, Liang T, et al. Long-term outcome of combined liver-kidney  
16 transplantation: A single-center experience in China. *Hepatogastroenterology*  
17 2008;55(82-83):334-37 Online First.  
18  
19 295. Wu J, Zhu SM, He HL, et al. Plasma propofol concentrations during orthotopic liver  
20 transplantation. *Acta Anaesthesiol Scand* 2005;49(6):804-10 doi: 10.1111/j.1399-  
21 6576.2005.00671.xpublished Online First.  
22  
23 296. Wu L, Chen L, Zhou L, et al. Association of interleukin 18 gene promoter  
24 polymorphisms with HBV recurrence after liver transplantation in Han Chinese  
25 population. *Hepatitis Monthly* 2011;11(6):469-74 Online First.  
26  
27 297. Wu L, Hu A, Tam N, et al. Salvage liver transplantation for patients with recurrent  
28 hepatocellular carcinoma after curative resection. *PLoS One* 2012;7(7) doi:  
29 10.1371/journal.pone.0041820published Online First.  
30  
31 298. Wu L, Tam N, Deng R, et al. Steroid-resistant acute rejection after cadaveric liver  
32 transplantation: Experience from one single center. *Clinics and Research in*  
33 *Hepatology and Gastroenterology* 2014;38(5):592-97 doi:  
34 10.1016/j.clinre.2014.04.005published Online First.  
35  
36 299. Wu L, Xu X, Shen J, et al. MDR1 gene polymorphisms and risk of recurrence in  
37 patients with hepatocellular carcinoma after liver transplantation. *J Surg Oncol*  
38 2007;96(1):62-68 doi: 10.1002/jso.20774published Online First.  
39  
40 300. Wu L, Zhang J, Guo Z, et al. Diagnosis and treatment of acute appendicitis after  
41 orthotopic liver transplant in adults. *Exp Clin Transplant* 2011;9(2):113-17 Online  
42 First.  
43  
44  
45  
46  
47  
48  
49  
50  
51  
52  
53  
54  
55  
56  
57  
58  
59  
60

- 1  
2  
3 301. Wu L, Zhang J, Guo Z, et al. Hepatic artery thrombosis after orthotopic liver  
4 transplant: A review of the same institute 5 years later. *Exp Clin Transplant*  
5 2011;9(3):191-96 Online First.  
6  
7  
8 302. Wu LM, Xie HY, Zhou L, et al. A single nucleotide polymorphism in the vascular  
9 endothelial growth factor gene is associated with recurrence of hepatocellular  
10 carcinoma after transplantation. *Arch Med Res* 2009;40(7):565-70 doi:  
11 10.1016/j.arcmed.2009.07.011 published Online First.  
12  
13  
14 303. Wu LM, Yang Z, Zhou L, et al. Identification of histone deacetylase 3 as a biomarker  
15 for tumor recurrence following liver transplantation in HBV-associated hepatocellular  
16 carcinoma. *PLoS One* 2010;5(12) doi: 10.1371/journal.pone.0014460 published  
17 Online First.  
18  
19  
20 304. Wu LM, Zhang F, Xie HY, et al. MMP2 promoter polymorphism (C-1306T) and risk  
21 of recurrence in patients with hepatocellular carcinoma after transplantation. *Clin*  
22 *Genet* 2008;73(3):273-78 doi: 10.1111/j.1399-0004.2007.00955.x published Online  
23 First.  
24  
25  
26 305. Wu LM, Zhang F, Zhou L, et al. Predictive value of CpG island methylator  
27 phenotype for tumor recurrence in hepatitis B virus-associated hepatocellular  
28 carcinoma following liver transplantation. *BMC Cancer* 2010;10 doi: 10.1186/1471-  
29 2407-10-399 published Online First.  
30  
31  
32 306. Wu Y, Cai B, Tang J, et al. Tacrolimus may induce the production of nucleolar anti-  
33 nuclear antibody in liver transplant patients. *J Gastrointest Liver Dis*  
34 2011;20(3):267-70 Online First.  
35  
36  
37 307. Wu ZW, Lu HF, Wu J, et al. Assessment of the fecal lactobacilli population in  
38 patients with hepatitis b virus-related decompensated cirrhosis and hepatitis b  
39 cirrhosis treated with liver transplant. *Microb Ecol* 2012;63(4):929-37 doi:  
40 10.1007/s00248-011-9945-1 published Online First.  
41  
42  
43 308. Xia D, Yan LN, Li B, et al. Orthotopic liver transplantation for incurable alveolar  
44 echinococcosis: Report of five cases from west China. *Transplant Proc*  
45 2005;37(5):2181-84 doi: 10.1016/j.transproceed.2005.03.111 published Online First.  
46  
47  
48  
49  
50  
51  
52  
53  
54  
55  
56  
57  
58  
59  
60

- 1  
2  
3 309. Xia D, Yan LN, Xu L, et al. Postoperative Severe Pneumonia in Adult Liver  
4 Transplant Recipients. *Transplant Proc* 2006;38(9):2974-78 doi:  
5 10.1016/j.transproceed.2006.08.184published Online First.  
6  
7  
8 310. Xia W, Ke Q, Guo H, et al. Expansion of the Milan criteria without any sacrifice:  
9 Combination of the Hangzhou criteria with the pre-transplant platelet-to-lymphocyte  
10 ratio. *BMC Cancer* 2017;17 (1) Online First.  
11  
12 311. Xia W, Ke Q, Wang Y, et al. Donation after cardiac death liver transplantation: Graft  
13 quality evaluation based on pretransplant liver biopsy. *Liver Transpl* 2015;21(6):838-  
14 46 doi: 10.1002/lt.24123published Online First.  
15  
16 312. Xia W, Ke Q, Wang Y, et al. Predictive value of pre-transplant platelet to lymphocyte  
17 ratio for hepatocellular carcinoma recurrence after liver transplantation. *World J Surg*  
18 *Oncol* 2015;13(1) doi: 10.1186/s12957-015-0472-2published Online First.  
19  
20 313. Xia ZW, Jun CY, Hao C, et al. The occurrence of diarrhea not related to the  
21 pharmacokinetics of MPA and its metabolites in liver transplant patients. *Eur J Clin*  
22 *Pharmacol* 2010;66(7):671-79 doi: 10.1007/s00228-010-0833-2published Online First.  
23  
24 314. Xiao H, Tong R, Cheng S, et al. BAG3 and HIF-1 alpha coexpression detected by  
25 immunohistochemistry correlated with prognosis in hepatocellular carcinoma after  
26 liver transplantation. *BioMed Research International* 2014;2014 Online First.  
27  
28 315. Xiao L, Fu ZR, Ding GS, et al. Liver transplantation for Hepatitis B virus-related  
29 hepatocellular carcinoma: one center's experience in China. *Transplant Proc*  
30 2009;41(5):1717-21 doi: 10.1016/j.transproceed.2009.03.058published Online First.  
31  
32 316. Xiao L, Fu ZR, Ding GS, et al. Prediction of survival after liver transplantation for  
33 chronic severe hepatitis b based on preoperative prognostic scores: A single center's  
34 experience in China. *World J Surg* 2009;33(11):2420-26 doi: 10.1007/s00268-009-  
35 0183-3published Online First.  
36  
37 317. Xiao M, Xu X, Zhu H, et al. Efficacy and safety of basiliximab in liver  
38 transplantation for patients with hepatitis B virus-related diseases: A single centre  
39 study. *Int J Clin Pract* 2015;69(S183):35-42 doi: 10.1111/ijcp.12665published Online  
40 First.  
41  
42 318. Xie BX, Zhu YM, Chen C, et al. Outcome of TiNi stent treatments in symptomatic  
43 central airway stenoses caused by *Aspergillus fumigatus* infections after lung  
44  
45  
46  
47  
48  
49  
50  
51  
52  
53  
54  
55  
56  
57  
58  
59  
60

- transplantation. *Transplant Proc* 2013;45(6):2366-70 doi: 10.1016/j.transproceed.2013.02.129 published Online First.
319. Xie HY, Wang WL, Yao MY, et al. Polymorphisms in cytokine genes and their association with acute rejection and recurrence of Hepatitis B in Chinese liver transplant recipients. *Arch Med Res* 2008;39(4):420-28 doi: 10.1016/j.arcmed.2008.01.003 published Online First.
320. Xie M, Rao W, Sun LY, et al. Tacrolimus-related seizure after pediatric liver transplantation - A single-center experience. *Pediatr Transplant* 2014;18(1):58-63 doi: 10.1111/ptr.12198 published Online First.
321. Xie M, Rao W, Yang T, et al. Occult hepatitis B virus infection predicts de novo hepatitis B infection in patients with alcoholic cirrhosis after liver transplantation. *Liver International* 2015;35(3):897-904 doi: 10.1111/liv.12567 published Online First.
322. Xie SB, Zhu JY, Ying Z, et al. Prevention and risk factors of the HBV recurrence after orthotopic liver transplantation: 160 cases follow-up study. *Transplantation* 2010;90(7):786-90 doi: 10.1097/TP.0b013e3181f09c89 published Online First.
323. Xing T, Huang L, Yu Z, et al. Comparison of Steroid-Free Immunosuppression and Standard Immunosuppression for Liver Transplant Patients with Hepatocellular Carcinoma. *PLoS One* 2013;8(8) doi: 10.1371/journal.pone.0071251 published Online First.
324. Xing T, Qiu G, Zhong L, et al. Calcitriol reduces the occurrence of acute cellular rejection of liver transplants: A prospective controlled study. *Pharmazie* 2013;68(10):821-26 doi: 10.1691/ph.2013.3561 published Online First.
325. Xing T, Zhong L, Chen D, et al. Experience of combined liver-kidney transplantation for acute-on-chronic liver failure patients with renal dysfunction. *Transplant Proc* 2013;45(6):2307-13 doi: 10.1016/j.transproceed.2013.02.127 published Online First.
326. Xing T, Zhong L, Chen D, et al. Experience of combined liver-kidney transplantation for acute-on-chronic liver failure patients with renal dysfunction.[Erratum appears in *Transplant Proc.* 2013 Sep;45(7):2859]. *Transplant Proc* 2013;45(6):2307-13 Online First.

- 1  
2  
3 327. Xing T, Zhong L, Lin L, et al. Immunity of fungal infections alleviated graft reject in  
4 liver transplantation compared with non-fungus recipients. *Int J Clin Exp Pathol*  
5 2015;8(3):2603-14 Online First.  
6  
7  
8 328. Xing T, Zhong L, Qiu G, et al. Evolution of CD4<sup>+</sup>CD25<sup>hi</sup> T cell subsets in  
9 Aspergillus-infected liver transplantation recipients reduces the incidence of  
10 transplantation rejection via upregulating the production of anti-inflammatory  
11 cytokines. *Genetics and Molecular Research* 2014;13(3):4932-39 doi:  
12 10.4238/2014.July.4.7published Online First.  
13  
14 329. Xing T, Zhong L, Qiu G, et al. Evolution of CD4<sup>+</sup>CD25<sup>hi</sup>  
15 T cell subsets in Aspergillus-infected liver transplantation recipients reduces the  
16 incidence of transplantation rejection via upregulating the production of anti-  
17 inflammatory cytokines. *Genetics and Molecular Research* 2014;13(3):4932-39  
18 Online First.  
19  
20 330. Xu G, Li LL, Sun ZT, et al. Effects of dexmedetomidine on postoperative cognitive  
21 dysfunction and serum levels of  $\beta$ -amyloid and neuronal microtubule-associated  
22 protein in orthotopic liver transplantation patients. *Ann Transplant* 2016;21:508-15  
23 doi: 10.12659/AOT.899340published Online First.  
24  
25 331. Xu H, Li W, Xu Z, et al. Evaluation of the right ventricular ejection fraction during  
26 classic orthotopic liver transplantation without venovenous bypass. *Clin Transplant*  
27 2012;26(5):E485-E91 doi: 10.1111/ctr.12010published Online First.  
28  
29 332. Xu J, Shen ZY, Chen XG, et al. A randomized controlled trial of licartin for  
30 preventing hepatoma recurrence after liver transplantation. *Hepatology*  
31 2007;45(2):269-76 doi: 10.1002/hep.21465published Online First.  
32  
33 333. Xu L, Li X, Xu M, et al. Perioperative use of ECMO during double lung  
34 transplantation. *ASAIO J* 2009;55(3):255-58 doi:  
35 10.1097/MAT.0b013e3181a05795published Online First.  
36  
37 334. Xu L, Xu MQ, Yan LN, et al. Causes of mortality after liver transplantation: A single  
38 center experience in mainland China. *Hepatogastroenterology* 2012;59(114):481-84  
39 doi: 10.5754/hge11419published Online First.  
40  
41 335. Xu SL, Zhang YC, Wang GY, et al. Survival analysis of sirolimus-based  
42 immunosuppression in liver transplantation in patients with hepatocellular carcinoma.  
43  
44  
45  
46  
47  
48  
49  
50  
51  
52  
53  
54  
55  
56  
57  
58  
59  
60



- 1  
2  
3 Clinics and Research in Hepatology and Gastroenterology 2016;40(6):674-81 Online  
4 First.  
5  
6  
7 336. Xu X, Guo HJ, Xie HY, et al. ZIP4, a novel determinant of tumor invasion in  
8 hepatocellular carcinoma, contributes to tumor recurrence after liver transplantation.  
9 Int J Biol Sci 2014;10(3):245-56 doi: 10.7150/ijbs.7401published Online First.  
10  
11 337. Xu X, Ke QH, Shao ZX, et al. The value of serum  $\alpha$ -fetoprotein in predicting tumor  
12 recurrence after liver transplantation for hepatocellular carcinoma. Dig Dis Sci  
13 2009;54(2):385-88 doi: 10.1007/s10620-008-0349-0published Online First.  
14  
15 338. Xu X, Ling Q, Gao F, et al. Hepatoprotective effects of marine and kuhuang in liver  
16 transplant recipients. Am J Chin Med 2009;37(1):27-34 Online First.  
17  
18 339. Xu X, Ling Q, Wang J, et al. Donor miR-196a-2 polymorphism is associated with  
19 hepatocellular carcinoma recurrence after liver transplantation in a Han Chinese  
20 population. Int J Cancer 2016;138(3):620-29 Online First.  
21  
22 340. Xu X, Ling Q, Wu J, et al. A novel prognostic model based on serum levels of total  
23 bilirubin and creatinine early after liver transplantation. Liver International  
24 2007;27(6):816-24 doi: 10.1111/j.1478-3231.2007.01494.xpublished Online First.  
25  
26 341. Xu X, Ling Q, Zhang M, et al. Outcome of patients with hepatorenal syndrome type 1  
27 after liver transplantation: Hangzhou experience. Transplantation 2009;87(10):1514-  
28 19 doi: 10.1097/TP.0b013e3181a4430bpublished Online First.  
29  
30 342. Xu X, Liu X, Ling Q, et al. Artificial liver support system combined with liver  
31 transplantation in the treatment of patients with acute-on-chronic liver failure. PLoS  
32 One 2013;8(3) doi: 10.1371/journal.pone.0058738published Online First.  
33  
34 343. Xu X, Qu K, Wan Y, et al. Tumor existence and tumor size as prognostic factors in  
35 hepatitis B virus-related cirrhosis patients who underwent liver transplantation.  
36 Transplant Proc 2014;46(5):1389-92 doi:  
37 10.1016/j.transproceed.2014.01.011published Online First.  
38  
39 344. Xu X, Tu Z, Wang B, et al. A novel model for evaluating the risk of hepatitis B  
40 recurrence after liver transplantation. Liver International 2011;31(10):1477-84 doi:  
41 10.1111/j.1478-3231.2011.02500.xpublished Online First.  
42  
43  
44  
45  
46  
47  
48  
49  
50  
51  
52  
53  
54  
55  
56  
57  
58  
59  
60

- 1  
2  
3 345. Xu ZD, Xu HT, Li WW, et al. Influence of preoperative diastolic dysfunction on  
4 hemodynamics and outcomes of patients undergoing orthotopic liver transplantation.  
5 Int J Clin Exp Med 2013;6(5):351-57 Online First.  
6  
7  
8 346. Xue F, Higgs BW, Huang J, et al. HERC5 is a prognostic biomarker for post-liver  
9 transplant recurrent human hepatocellular carcinoma. J Transl Med 2015;13(1) doi:  
10 10.1186/s12967-015-0743-2published Online First.  
11  
12  
13 347. Xue F, Zhang J, Han L, et al. Immune cell functional assay in monitoring of adult  
14 liver transplantation recipients with infection. Transplantation 2010;89(5):620-26 doi:  
15 10.1097/TP.0b013e3181c690fapublished Online First.  
16  
17  
18 348. Xue J, Wang L, Chen CM, et al. Acute kidney injury influences mortality in lung  
19 transplantation. Ren Fail 2014;36(4):541-45 doi:  
20 10.3109/0886022X.2013.876350published Online First.  
21  
22  
23 349. Xue M, Lv C, Chen X, et al. Donor liver steatosis: A risk factor for early new-onset  
24 diabetes after liver transplantation. Journal of Diabetes Investigation 2017;8(2):181-  
25 87 doi: 10.1111/jdi.12560published Online First.  
26  
27  
28 350. Xue M, Lv C, Chen X, et al. Effect of interleukin-2 receptor antagonists on new-onset  
29 diabetes after liver transplantation: A retrospective cohort study. Journal of Diabetes  
30 2015 Online First.  
31  
32  
33 351. Yambe T, Meng X, Hou X, et al. Cardio-ankle vascular index (CAVI) for the  
34 monitoring of the atherosclerosis after heart transplantation. Biomed Pharmacother  
35 2005;59(SUPPL. 1):S177-S79 doi: 10.1016/S0753-3322(05)80028-9published  
36 Online First.  
37  
38  
39 352. Yan L, Li B, Wen T, et al. Prophylaxis against hepatitis B recurrence  
40 posttransplantation using lamivudine and individualized low-dose hepatitis B  
41 immunoglobulin. Am J Transplant 2010;10(8):1861-69 Online First.  
42  
43  
44 353. Yan S, Tu Z, Lu W, et al. Clinical utility of an automated pupillometer for assessing  
45 and monitoring recipients of liver transplantation. Liver Transpl 2009;15(12):1718-27  
46 doi: 10.1002/lt.21924published Online First.  
47  
48  
49 354. Yang CH, He XS, Chen J, et al. Fungal infection in patients after liver transplantation  
50 in years 2003 to 2012. Ann Transplant 2012;17(4):59-63 doi:  
51 10.12659/AOT.883695published Online First.  
52  
53  
54  
55  
56  
57  
58  
59

- 1  
2  
3 355. Yang J, Zhu L, Zhang Y, et al. PPK analysis of tacrolimus early after Chinese  
4 pediatric and adult liver transplantation with different CYP3A5 genotypes. *Latin*  
5 *American Journal of Pharmacy* 2017;36(2):238-46 Online First.  
6  
7  
8 356. Yang JW, Liao SS, Zhu LQ, et al. Population pharmacokinetic analysis of tacrolimus  
9 early after Chinese pediatric liver transplantation. *Int J Clin Pharmacol Ther*  
10 2015;53(1):75-83 doi: 10.5414/CP202189published Online First.  
11  
12  
13 357. Yang X, Lu Q, Tang T, et al. Prediction of the prognosis after liver transplantation in  
14 severe hepatitis B-induced liver failure and clinical decision for liver transplantation.  
15 *J Surg Res* 2013;183(2):846-51 doi: 10.1016/j.jss.2013.01.034published Online First.  
16  
17  
18 358. Yang YJ, Chen DZ, Li LX, et al. Sirolimus-based immunosuppressive therapy in liver  
19 transplant recipient with tacrolimus-related chronic renal insufficiency. *Transplant*  
20 *Proc* 2008;40(5):1541-44 doi: 10.1016/j.transproceed.2008.01.081published Online  
21 First.  
22  
23  
24  
25 359. Yang YL, Shi LJ, Lin MJ, et al. Clinical analysis and significance of cholangiography  
26 for biliary cast/stone after orthotopic liver transplantation. *Journal of Nanoscience*  
27 *and Nanotechnology* 2013;13(1):171-77 doi: 10.1166/jnn.2013.6790published Online  
28 First.  
29  
30  
31  
32 360. Yang Z, Zhou L, Wu LM, et al. Combination of polymorphisms within the HDAC1  
33 and HDAC3 gene predict tumor recurrence in hepatocellular carcinoma patients that  
34 have undergone transplant therapy. *Clin Chem Lab Med* 2010;48(12):1785-91 doi:  
35 10.1515/CCLM.2010.353published Online First.  
36  
37  
38  
39 361. Yang Z, Zhou L, Wu LM, et al. Overexpression of long non-coding RNA HOTAIR  
40 predicts tumor recurrence in hepatocellular carcinoma patients following liver  
41 transplantation. *Ann Surg Oncol* 2011;18(5):1243-50 doi: 10.1245/s10434-011-1581-  
42 ypublished Online First.  
43  
44  
45  
46 362. Yao J, Feng XW, Yu XB, et al. Recipient IL-6-572c/G genotype is associated with  
47 reduced incidence of acute rejection following liver transplantation. *J Int Med Res*  
48 2013;41(2):356-64 doi: 10.1177/0300060513477264published Online First.  
49  
50  
51 363. Ye D, Li H, Wang Y, et al. Circulating Fibroblast Growth Factor 21 Is A Sensitive  
52 Biomarker for Severe Ischemia/reperfusion Injury in Patients with Liver  
53 Transplantation. *Sci Rep* 2016;6:19776 Online First.  
54  
55  
56  
57  
58  
59  
60

- 1  
2  
3 364. Yi H, An Y, Lv H, et al. The association of lipopolysaccharide and inflammatory  
4 factors with hepatopulmonary syndrome and their changes after orthotopic liver  
5 transplantation. *J Thorac Dis* 2014;6(10):1469-75 doi: 10.3978/j.issn.2072-  
6 1439.2014.10.05published Online First.  
7  
8  
9  
10 365. Yu D, Liu J, Chen J, et al. GGPPS1 predicts the biological character of hepatocellular  
11 carcinoma in patients with cirrhosis. *BMC Cancer* 2014;14 (1) Online First.  
12  
13 366. Yu S, Gao F, Yu J, et al. De novo cancers following liver transplantation: A single  
14 center experience in China. *PLoS One* 2014;9 (1) Online First.  
15  
16 367. Yu S, He X, Yang L, et al. A retrospective study of conversion from tacrolimus-based  
17 to sirolimus-based immunosuppression in orthotopic liver transplant recipients. *Exp*  
18 *Clin Transplant* 2008;6(2):113-17 Online First.  
19  
20 368. Yu S, Wu L, Jin J, et al. Influence of CYP3A5 gene polymorphisms of donor rather  
21 than recipient to tacrolimus individual dose requirement in liver transplantation.  
22 *Transplantation* 2006;81(1):46-51 doi: 10.1097/01.tp.0000188118.34633.bfpublished  
23 Online First.  
24  
25 369. Yu S, Yu J, Zhang W, et al. Safe use of liver grafts from hepatitis B surface antigen  
26 positive donors in liver transplantation. *J Hepatol* 2014;61(4):809-15 Online First.  
27  
28 370. Yu X, Liu Z, Wang Y, et al. Characteristics of gammadelta1 and gammadelta 2 T cell  
29 subsets in acute liver allograft rejection. *Transpl Immunol* 2013;29(1-4):118-22  
30 Online First.  
31  
32 371. Yu X, Wei B, Dai Y, et al. Genetic polymorphism of Interferon Regulatory Factor 5  
33 (IRF5) correlates with allograft acute rejection of liver transplantation. *PLoS One*  
34 2014;9(4) doi: 10.1371/journal.pone.0094426published Online First.  
35  
36 372. Yu X, Xie H, Wei B, et al. Association of MDR1 gene SNPs and haplotypes with the  
37 tacrolimus dose requirements in Han Chinese liver transplant recipients. *PLoS One*  
38 2011;6(11) doi: 10.1371/journal.pone.0025933published Online First.  
39  
40 373. Yu Z, Sun Z, Yu S, et al. Safety limitations of fatty liver transplantation can be  
41 extended to 40%: Experience of a single centre in China. *Liver International* 2016  
42 Online First.  
43  
44  
45  
46  
47  
48  
49  
50  
51  
52  
53  
54  
55  
56  
57  
58  
59  
60

- 1  
2  
3 374. Yuan D, Wei YG, Lin HM, et al. Risk factors of biliary complications following liver  
4 transplantation: Retrospective analysis of a single centre. *Postgrad Med J*  
5 2009;85(1001):119-23 doi: 10.1136/pgmj.2008.075176published Online First.  
6  
7  
8 375. Yuan X, Chen C, Zhou J, et al. Organ donation and transplantation from donors with  
9 systemic infection: a single-center experience. *Transplant Proc* 2016;48(7):2454-57  
10 Online First.  
11  
12  
13 376. Yuefeng M, Weili F, Wenxiang T, et al. Long-term outcome of patients with  
14 lamivudine after early cessation of hepatitis B immunoglobulin for prevention of  
15 recurrent hepatitis B following liver transplantation. *Clin Transplant* 2011;25(4):517-  
16 22 Online First.  
17  
18  
19  
20 377. Zeng Z, Jiang Z, Wang CS, et al. Preoperative evaluation improves the outcome in  
21 heart transplant recipients with pulmonary hypertension-retrospective analysis of 106  
22 cases. *Transplant Proc* 2010;42(9):3708-10 doi:  
23 10.1016/j.transproceed.2010.08.067published Online First.  
24  
25  
26  
27 378. Zhai H, Liang P, Yu XL, et al. Microwave ablation in treating intrahepatic recurrence  
28 of hepatocellular carcinoma after liver transplantation: An analysis of 11 cases. *Int J*  
29 *Hyperthermia* 2015;31(8):863-68 doi: 10.3109/02656736.2015.1091953published  
30 Online First.  
31  
32  
33  
34 379. Zhang A, Zhang M, Shen Y, et al. Hepatitis B virus reactivation is a risk factor for  
35 development of post-transplant lymphoproliferative disease after liver transplantation.  
36 *Clin Transplant* 2009;23(5):756-60 doi: 10.1111/j.1399-0012.2009.01049.xpublished  
37 Online First.  
38  
39  
40  
41 380. Zhang C, Rao J, Tu Z, et al. Surgical resection of resectable thoracic metastatic  
42 hepatocellular carcinoma after liver transplantation. *J Thorac Cardiovasc Surg*  
43 2009;138(1):240-41 doi: 10.1016/j.jtcvs.2008.05.014published Online First.  
44  
45  
46 381. Zhang D, Jiao Z, Han J, et al. Clinicopathological features of hepatitis B virus  
47 recurrence after liver transplantation: Eleven-year experience. *Int J Clin Exp Pathol*  
48 2014;7(7):4057-66 Online First.  
49  
50  
51 382. Zhang F, Wu LM, Zhou L, et al. Predictive value of expression and promoter  
52 hypermethylation of XAF1 in hepatitis B virus-associated hepatocellular carcinoma  
53  
54  
55  
56  
57  
58  
59

- 1  
2  
3 treated with transplantation. *Ann Surg Oncol* 2008;15(12):3494-502 doi:  
4 10.1245/s10434-008-0146-1published Online First.  
5  
6  
7 383. Zhang FJ, Li CX, Liang Z, et al. Short- to mid-term evaluation of CT-guided 125I  
8 brachytherapy on intra-hepatic recurrent tumors and/or extra-hepatic metastases after  
9 liver transplantation for hepatocellular carcinoma. *Cancer Biology and Therapy*  
10 2009;8(7):585-90 Online First.  
11  
12  
13 384. Zhang G, Cheng Y, Shen W, et al. The short-term effect of liver transplantation on  
14 the low-frequency fluctuation of brain activity in cirrhotic patients with and without  
15 overt hepatic encephalopathy. *Brain Imaging and Behavior* 2016:1-13 Online First.  
16  
17  
18 385. Zhang H, Chen L, Gu G, et al. Clinical observation and nursing care on the  
19 prevention of abdominal organ cluster transplantation rejection. *J Clin Nurs*  
20 2013;22(11-12):1599-603 doi: 10.1111/jocn.12079published Online First.  
21  
22  
23 386. Zhang H, Shi Y, Wu H, et al. Change of hepatic arterial systolic/diastolic ratio  
24 predicts ischemic type biliary lesion after orthotopic liver transplantation. *Clin*  
25 *Imaging* 2016;40(3):419-24 Online First.  
26  
27  
28 387. Zhang HM, Jiang WT, Pan C, et al. Milan criteria, University of California, San  
29 Francisco, criteria, and model for end-stage liver disease score as predictors of  
30 salvage liver transplantation. *Transplant Proc* 2015;47(2):438-44 doi:  
31 10.1016/j.transproceed.2014.10.046published Online First.  
32  
33  
34 388. Zhang HM, Li SP, Yu Y, et al. Bi-directional roles of IRF-1 on autophagy diminish  
35 its prognostic value as compared with Ki67 in liver transplantation for hepatocellular  
36 carcinoma. *Oncotarget* 2016;7(25):37979-92 doi: 10.18632/oncotarget.9365published  
37 Online First.  
38  
39  
40 389. Zhang LJ, Yang GF, Jiang B, et al. Cavernous transformation of portal vein: 16-Slice  
41 CT portography and correlation with surgical procedure of orthotopic liver  
42 transplantation. *Abdom Imaging* 2008;33(5):529-35 doi: 10.1007/s00261-007-9343-  
43 9published Online First.  
44  
45  
46 390. Zhang M, Yin F, Chen B, et al. Mortality risk after liver transplantation in  
47 hepatocellular carcinoma recipients: A nonlinear predictive model. *Surgery (United*  
48 *States)* 2012;151(6):889-97 doi: 10.1016/j.surg.2011.12.034published Online First.  
49  
50  
51  
52  
53  
54  
55  
56  
57  
58  
59

- 1  
2  
3 391. Zhang M, Yin F, Chen B, et al. Pretransplant prediction of posttransplant survival for  
4 liver recipients with benign end-stage liver diseases: A nonlinear model. *PLoS One*  
5 2012;7 (3) Online First.  
6  
7  
8 392. Zhang M, Zhong X, Zhang W, et al. Human parvovirus B19 infection induced pure  
9 red cell aplasia in liver transplant recipients. *Int J Clin Pract* 2015;69(S183):29-34 doi:  
10 10.1111/ijcp.12664published Online First.  
11  
12  
13 393. Zhang ML, Xu J, Zhang W, et al. Microbial epidemiology and risk factors of  
14 infections in recipients after DCD liver transplantation. *Int J Clin Pract* 2016;70:17-21  
15 doi: 10.1111/ijcp.12812published Online First.  
16  
17  
18 394. Zhang P, Guo Z, Zhong K, et al. Evaluation of Immune Profiles and MicroRNA  
19 Expression Profiles in Peripheral Blood Mononuclear Cells of Long-Term Stable  
20 Liver Transplant Recipients and Recipients with Acute Rejection Episodes.  
21  
22  
23  
24  
25  
26  
27 395. Zhang Q, Chen H, Li Q, et al. Combination adjuvant chemotherapy with oxaliplatin,  
28 5-fluorouracil and leucovorin after liver transplantation for hepatocellular carcinoma:  
29 A preliminary open-label study. *Invest New Drugs* 2011;29(6):1360-69 doi:  
30 10.1007/s10637-011-9726-1published Online First.  
31  
32  
33  
34 396. Zhang Q, Chen X, Zang Y, et al. The survival benefit of liver transplantation for  
35 hepatocellular carcinoma patients with hepatitis b virus infection and cirrhosis. *PLoS*  
36  
37  
38  
39  
40 397. Zhang Q, Chen X, Zhou J, et al. CD147, MMP-2, MMP-9 and MVD-CD34 are  
41 significant predictors of recurrence after liver transplantation in hepatocellular  
42 carcinoma patients. *Cancer Biol Ther* 2006;5(7):808-14 Online First.  
43  
44  
45 398. Zhang Q, Shang L, Zang Y, et al.  $\alpha$ -Fetoprotein is a potential survival predictor in  
46 hepatocellular carcinoma patients with hepatitis B selected for liver transplantation.  
47  
48  
49  
50  
51 399. Zhang W, Zhong H, Zhuang L, et al. Peripheral blood CD4+ cell ATP activity  
52 measurement to predict HCC recurrence post-DCD liver transplant. *Int J Clin Pract*  
53 2016;70:11-16 doi: 10.1111/ijcp.12811published Online First.  
54  
55  
56  
57  
58  
59  
60

- 1  
2  
3 400. Zhang X, Fan J, Yang MF, et al. Monitoring of human cytomegalovirus infection in  
4 bone marrow and liver transplant recipients by antigenaemia assay and enzyme-  
5 linked immunosorbent assay. *J Int Med Res* 2009;37(1):31-36 Online First.  
6  
7  
8 401. Zhang X, Wang Z, Fan J, et al. Impact of interleukin-10 gene polymorphisms on  
9 tacrolimus dosing requirements in Chinese liver transplant patients during the early  
10 posttransplantation period. *Eur J Clin Pharmacol* 2011;67(8):803-13 doi:  
11 10.1007/s00228-011-0993-8published Online First.  
12  
13  
14 402. Zhang X, Xu J, Fan J, et al. Influence of IL-18 and IL-10 Polymorphisms on  
15 tacrolimus elimination in Chinese lung transplant patients. *Dis Markers* 2017;2017  
16 doi: 10.1155/2017/7834035published Online First.  
17  
18  
19 403. Zhang XD, Cheng Y, Poon CS, et al. Long-and short-range functional connectivity  
20 density alteration in non-alcoholic cirrhotic patients one month after liver  
21 transplantation: A resting-state fMRI study. *Brain Res* 2015;1620:177-87 doi:  
22 10.1016/j.brainres.2015.04.046published Online First.  
23  
24  
25 404. Zhang XF, Lv Y, Xue WJ, et al. Mycobacterium tuberculosis Infection in Solid  
26 Organ Transplant Recipients: Experience From a Single Center in China. *Transplant*  
27 *Proc* 2008;40(5):1382-85 doi: 10.1016/j.transproceed.2008.01.075published Online  
28 First.  
29  
30  
31 405. Zhang XQ, Wang ZW, Fan JW, et al. The impact of sulfonylureas on tacrolimus  
32 apparent clearance revealed by a population pharmacokinetics analysis in Chinese  
33 adult liver-transplant patients. *Ther Drug Monit* 2012;34(2):126-33 doi:  
34 10.1097/FTD.0b013e31824a67ebpublished Online First.  
35  
36  
37 406. Zhang XX, Bian RJ, Wang J, et al. Relationship between cytokine gene  
38 polymorphisms and acute rejection following liver transplantation. *Genetics and*  
39 *Molecular Research* 2016;15 (2) 15027599) Online First.  
40  
41  
42 407. Zhang Y, Wang YL, Liu YW, et al. Change of peripheral blood mononuclear cells  
43 IFN- $\gamma$ , IL-10, and TGF- $\beta$ 1 mRNA expression levels with active human  
44 cytomegalovirus infection in orthotopic liver transplantation. *Transplant Proc*  
45 2009;41(5):1767-69 doi: 10.1016/j.transproceed.2009.03.064published Online First.  
46  
47  
48 408. Zhang Y, Yan L, Wen T, et al. Prophylaxis against hepatitis B virus recurrence after  
49 liver transplantation for hepatitis B virus-related end-stage liver diseases with severe  
50  
51  
52  
53  
54  
55  
56  
57  
58  
59  
60



- hypersplenism and splenomegaly: Role of splenectomy. *J Surg Res* 2012;178(1):478-86 doi: 10.1016/j.jss.2012.02.047published Online First.
409. Zhang YC, Liu W, Fu BS, et al. Therapeutic potentials of umbilical cord-derived mesenchymal stromal cells for ischemic-type biliary lesions following liver transplantation. *Cytotherapy* 2017;19(2):194-99 Online First.
410. Zhang YC, Qu EZ, Ren J, et al. New diagnosis and therapy model for ischemic-type biliary lesions following liver transplantation-a retrospective cohort study. *PLoS One* 2014;9(9) doi: 10.1371/journal.pone.0105795published Online First.
411. Zheng RQ, Mao R, Ren J, et al. Contrast-enhanced ultrasound for the evaluation of hepatic artery stenosis after liver transplantation: Potential role in changing the clinical algorithm. *Liver Transpl* 2010;16(6):729-35 doi: 10.1002/lt.22054published Online First.
412. Zheng S, Chen Y, Liang T, et al. Prevention of hepatitis B recurrence after liver transplantation using lamivudine or lamivudine combined with hepatitis B immunoglobulin prophylaxis. *Liver Transpl* 2006;12(2):253-58 doi: 10.1002/lt.20701published Online First.
413. Zheng SS, Xu X, Wu J, et al. Liver transplantation for hepatocellular carcinoma: Hangzhou experiences. *Transplantation* 2008;85(12):1726-32 doi: 10.1097/TP.0b013e31816b67e4published Online First.
414. Zheng Z, Gao S, Yang Z, et al. Single nucleotide polymorphisms in the metastasis associated in colon cancer-1 gene predict the recurrence of hepatocellular carcinoma after transplantation. *Int J Med Sci* 2014;11(2):142-50 doi: 10.7150/ijms.7142published Online First.
415. Zheng Z, Lin B, Zhang J, et al. Absolute lymphocyte count recovery at 1 month after transplantation predicts favorable outcomes of patients with hepatocellular carcinoma. *Journal of Gastroenterology and Hepatology (Australia)* 2015;30(4):706-11 doi: 10.1111/jgh.12782published Online First.
416. Zhenglu W, Hui L, Shuying Z, et al. A clinical-pathological analysis of drug-induced hepatic injury after liver transplantation. *Transplant Proc* 2007;39(10):3287-91 doi: 10.1016/j.transproceed.2007.08.096published Online First.

- 1  
2  
3 417. Zhong L, Li H, Li Z, et al. C7 genotype of the donor may predict early bacterial  
4 infection after liver transplantation. *Sci Rep* 2016;6:24121 Online First.  
5  
6 418. Zhong L, Men TY, Li H, et al. Multidrug-resistant gram-negative bacterial infections  
7 after liver transplantation - Spectrum and risk factors. *J Infect* 2012;64(3):299-310 doi:  
8 10.1016/j.jinf.2011.12.005published Online First.  
9  
10 419. Zhong X, Zhang W, Xu J, et al. Human parvovirus B19 infection induced pure red  
11 cell aplasia in liver transplant recipients. *Int J Clin Pract* 2015;69(S183):29-34 Online  
12 First.  
13  
14 420. Zhong ZQ, Luo AJ, Wan QQ, et al. Pseudomonas aeruginosa infection among liver  
15 transplant recipients: a clinical analysis of 15 cases. *Transplant Proc*  
16 2016;48(6):2130-34 Online First.  
17  
18 421. Zhongyang S, Yihe L, Lixin Y, et al. An experience from China of perioperative care  
19 in 1510 liver transplant recipients. *Int Anesthesiol Clin* 2006;44(4):121-26 doi:  
20 10.1097/01.aia.0000210820.31029.92published Online First.  
21  
22 422. Zhou B, Shan H, Zhu KS, et al. Chemoembolization with lobaplatin mixed with  
23 iodized oil for unresectable recurrent hepatocellular carcinoma after orthotopic liver  
24 transplantation. *J Vasc Interv Radiol* 2010;21(3):333-38 doi:  
25 10.1016/j.jvir.2009.11.006published Online First.  
26  
27 423. Zhou J, Fan J, Wang JH, et al. Continuous transcatheter arterial thrombolysis for  
28 early hepatic artery thrombosis after liver transplantation. *Transplant Proc*  
29 2005;37(10):4426-29 doi: 10.1016/j.transproceed.2005.10.113published Online First.  
30  
31 424. Zhou J, Huang H, Liu S, et al. Staphylococcus Aureus bacteremias following liver  
32 transplantation: A clinical analysis of 20 cases. *Ther Clin Risk Manag* 2015;11:933-  
33 37 doi: 10.2147/TCRM.S84579published Online First.  
34  
35 425. Zhou J, Ju W, Yuan X, et al. ABO-incompatible liver transplantation for severe  
36 hepatitis B patients. *Transpl Int* 2015;28(7):793-99 doi: 10.1111/tri.12531published  
37 Online First.  
38  
39 426. Zhou J, Wang Z, Qiu SJ, et al. Surgical treatment for early hepatocellular carcinoma:  
40 Comparison of resection and liver transplantation. *J Cancer Res Clin Oncol*  
41 2010;136(9):1453-60 doi: 10.1007/s00432-010-0802-2published Online First.  
42  
43  
44  
45  
46  
47  
48  
49  
50  
51  
52  
53  
54  
55  
56  
57  
58  
59

- 1  
2  
3 427. Zhou J, Wang Z, Wu ZQ, et al. Sirolimus-based immunosuppression therapy in liver  
4 transplantation for patients with hepatocellular carcinoma exceeding the milan criteria.  
5 Transplant Proc 2008;40(10):3548-53 doi:  
6 10.1016/j.transproceed.2008.03.165published Online First.  
7  
8  
9 428. Zhou L, Fan J, Zheng SS, et al. Prevalence of human cytomegalovirus UL97 D605E  
10 mutation in transplant recipients in China. Transplant Proc 2006;38(9):2926-28 doi:  
11 10.1016/j.transproceed.2006.08.161published Online First.  
12  
13 429. Zhou L, Wei B, Xing C, et al. Polymorphism in 3'-untranslated region of toll-like  
14 receptor 4 gene is associated with protection from hepatitis B virus recurrence after  
15 liver transplantation. Transpl Infect Dis 2011;13(3):250-58 doi: 10.1111/j.1399-  
16 3062.2010.00574.xpublished Online First.  
17  
18 430. Zhou L, Zhou W, Wu L, et al. The association of frequent allelic loss on 17p13.1 with  
19 early metastatic recurrence of hepatocellular carcinoma after liver transplantation. J  
20 Surg Oncol 2010;102(7):802-08 doi: 10.1002/jso.21743published Online First.  
21  
22 431. Zhou Q, Wang Y, Zhou X, et al. Prognostic analysis for treatment modalities in  
23 hepatocellular carcinomas with portal vein tumor thrombi. Asian Pac J Cancer Prev  
24 2011;12(11):2847-50 Online First.  
25  
26 432. Zhou ZB, Shao XX, Yang XY, et al. Influence of Hydroxyethyl starch on renal  
27 function after orthotopic liver transplantation. Transplant Proc 2015;47(6):1616-19  
28 doi: 10.1016/j.transproceed.2015.04.095published Online First.  
29  
30 433. Zhu B, Chen Y, Xie Y, et al. Kaposi's sarcoma-associated herpesvirus (KSHV)  
31 infection: Endemic strains and cladograms from immunodeficient patients in China. J  
32 Clin Virol 2008;42(1):7-12 Online First.  
33  
34 434. Zhu L, Wang H, Rao W, et al. A limited sampling strategy for tacrolimus in liver  
35 transplant patients. Int J Clin Pharmacol Ther 2013;51(6):509-12 doi:  
36 10.5414/CP201876published Online First.  
37  
38 435. Zhu L, Yang J, Jing Y, et al. Effects of CYP3A5 genotypes, ABCB1 C3435T and  
39 G2677T/A polymorphism on pharmacokinetics of Tacrolimus in Chinese adult liver  
40 transplant patients. Xenobiotica 2015;45(9):840-46 Online First.  
41  
42  
43  
44  
45  
46  
47  
48  
49  
50  
51  
52  
53  
54  
55  
56  
57  
58  
59  
60

- 1  
2  
3 436. Zhu M, Li Y, Xia Q, et al. Strong impact of acute kidney injury on survival after liver  
4 transplantation. *Transplant Proc* 2010;42(9):3634-38 doi:  
5  
6 10.1016/j.transproceed.2010.08.059published Online First.  
7  
8 437. Zhu Q, Zhou L, Yang Z, et al. O-GlcNAcylation plays a role in tumor recurrence of  
9 hepatocellular carcinoma following liver transplantation. *Med Oncol* 2012;29(2):985-  
10 93 doi: 10.1007/s12032-011-9912-1published Online First.  
11  
12 438. Zhu X, Wu Y, Qiu Y, et al. Effects of  $\omega$ -3 fish oil lipid emulsion combined with  
13 parenteral nutrition on patients undergoing liver transplantation. *Journal of Parenteral*  
14 *and Enteral Nutrition* 2013;37(1):68-74 doi: 10.1177/0148607112440120published  
15 Online First.  
16  
17 439. Zhu XD, Shen ZY, Chen XG, et al. Pathotyping and clinical manifestations of biliary  
18 cast syndrome in patients after an orthotopic liver transplant. *Exp Clin Transplant*  
19 2013;11(2):142-49 doi: 10.6002/ect.2012.0035published Online First.  
20  
21 440. Zhu XS, Gao YH, Wang SS, et al. Contrast-enhanced ultrasound diagnosis of splenic  
22 artery steal syndrome after orthotopic liver transplantation. *Liver Transpl*  
23 2012;18(8):966-71 doi: 10.1002/lt.23453published Online First.  
24  
25 441. Zhu XS, Wang SS, Cheng Q, et al. Using ultrasonography to monitor liver blood flow  
26 for liver transplant from donors supported on extracorporeal membrane oxygenation.  
27 *Liver Transpl* 2016;22(2):188-91 doi: 10.1002/lt.24318published Online First.  
28  
29 442. Zhu ZJ, Shen ZY, Gao W, et al. Feasibility of using a liver infected with *Clonorchis*  
30 *sinensis* for liver transplantation: Fourteen cases. *Liver Transpl* 2010;16(12):1440-42  
31 doi: 10.1002/lt.22147published Online First.  
32  
33 443. Zicheng Y, Weixia Z, Hao C, et al. Limited sampling strategy for the estimation of  
34 mycophenolic acid area under the plasma concentration-time curve in adult patients  
35 undergoing liver transplant. *Ther Drug Monit* 2007;29(2):207-14 doi:  
36 10.1097/FTD.0b013e318040ce0bpublished Online First.  
37  
38 444. Zou SJ, Chen D, Li YZ, et al. Monitoring hepatocyte dysfunction and biliary  
39 complication after liver transplantation using quantitative hepatobiliary scintigraphy.  
40 *Medicine (United States)* 2015;94(45):e2009 doi:  
41 10.1097/MD.0000000000002009published Online First.  
42  
43  
44  
45  
46  
47  
48  
49  
50  
51  
52  
53  
54  
55  
56  
57  
58  
59

- 1  
2  
3 445. Zou Y, Yang X, Jiang X, et al. High levels of soluble Major Histocompatibility  
4 Complex class I related chain A (MICA) are associated with biliary cast syndrome  
5 after liver transplantation. *Transpl Immunol* 2009;21(4):210-14 doi:  
6 10.1016/j.trim.2009.06.003 published Online First.  
7  
8  
9  
10  
11  
12  
13  
14  
15  
16  
17  
18  
19  
20  
21  
22  
23  
24  
25  
26  
27  
28  
29  
30  
31  
32  
33  
34  
35  
36  
37  
38  
39  
40  
41  
42  
43  
44  
45  
46  
47  
48  
49  
50  
51  
52  
53  
54  
55  
56  
57  
58  
59  
60



1  
2  
3  
4  
5  
6  
7  
8  
9  
10  
11  
12  
13  
14  
15  
16  
17  
18  
19  
20  
21  
22  
23  
24  
25  
26  
27  
28  
29  
30  
31  
32  
33  
34  
35  
36  
37  
38  
39  
40  
41  
42  
43  
44  
45  
46  
47



The image shows a large, empty table grid. The table has approximately 10 columns and 30 rows. The text within the table is extremely small and illegible, appearing as a dense grid of lines. The table is centered on the page and is partially overlaid by a large, diagonal watermark that reads "For peer review only".

For peer review only





1  
2  
3  
4  
5  
6  
7  
8  
9  
10  
11  
12  
13  
14  
15  
16  
17  
18  
19  
20  
21  
22  
23  
24  
25  
26  
27  
28  
29  
30  
31  
32  
33  
34  
35  
36  
37  
38  
39  
40  
41  
42  
43  
44  
45  
46  
47

For peer review only

| Section | Item | 1 | 2 | 3 | 4 | 5 | 6 | 7 | 8  | 9  | 10 | 11 | 12 | 13 | 14 | 15 | 16 | 17 | 18 | 19 | 20 | 21 | 22 | 23 | 24 | 25 | 26 | 27 | 28 | 29 | 30 | 31 | 32 | 33 | 34 | 35 | 36 | 37 | 38 | 39 | 40 | 41 | 42 | 43 | 44 | 45 | 46 | 47 |
|---------|------|---|---|---|---|---|---|---|----|----|----|----|----|----|----|----|----|----|----|----|----|----|----|----|----|----|----|----|----|----|----|----|----|----|----|----|----|----|----|----|----|----|----|----|----|----|----|----|
| 1       | 2    | 3 | 4 | 5 | 6 | 7 | 8 | 9 | 10 | 11 | 12 | 13 | 14 | 15 | 16 | 17 | 18 | 19 | 20 | 21 | 22 | 23 | 24 | 25 | 26 | 27 | 28 | 29 | 30 | 31 | 32 | 33 | 34 | 35 | 36 | 37 | 38 | 39 | 40 | 41 | 42 | 43 | 44 | 45 | 46 | 47 |    |    |

1  
2  
3  
4  
5  
6  
7  
8  
9  
10  
11  
12  
13  
14  
15  
16  
17  
18  
19  
20  
21  
22  
23  
24  
25  
26  
27  
28  
29  
30  
31  
32  
33  
34  
35  
36  
37  
38  
39  
40  
41  
42  
43  
44  
45  
46  
47

| Section | Item | 1 | 2 | 3 | 4 | 5 | 6 | 7 | 8  | 9  | 10 | 11 | 12 | 13 | 14 | 15 | 16 | 17 | 18 | 19 | 20 | 21 | 22 | 23 | 24 | 25 | 26 | 27 | 28 | 29 | 30 | 31 | 32 | 33 | 34 | 35 | 36 | 37 | 38 | 39 | 40 | 41 | 42 | 43 | 44 | 45 | 46 | 47 |
|---------|------|---|---|---|---|---|---|---|----|----|----|----|----|----|----|----|----|----|----|----|----|----|----|----|----|----|----|----|----|----|----|----|----|----|----|----|----|----|----|----|----|----|----|----|----|----|----|----|
| 1       | 2    | 3 | 4 | 5 | 6 | 7 | 8 | 9 | 10 | 11 | 12 | 13 | 14 | 15 | 16 | 17 | 18 | 19 | 20 | 21 | 22 | 23 | 24 | 25 | 26 | 27 | 28 | 29 | 30 | 31 | 32 | 33 | 34 | 35 | 36 | 37 | 38 | 39 | 40 | 41 | 42 | 43 | 44 | 45 | 46 | 47 |    |    |

For peer review only

1  
2  
3  
4  
5  
6  
7  
8  
9  
10  
11  
12  
13  
14  
15  
16  
17  
18  
19  
20  
21  
22  
23  
24  
25  
26  
27  
28  
29  
30  
31  
32  
33  
34  
35  
36  
37  
38  
39  
40  
41  
42  
43  
44  
45  
46  
47

For peer review only

| Section         | Item                                                               | Yes | No | Not applicable | Comments |
|-----------------|--------------------------------------------------------------------|-----|----|----------------|----------|
| 1. Introduction | 1.1. The title page includes the title, authors, and affiliations. |     |    |                |          |
|                 | 1.2. The title page includes a short running head.                 |     |    |                |          |
|                 | 1.3. The title page includes a short running head.                 |     |    |                |          |
|                 | 1.4. The title page includes a short running head.                 |     |    |                |          |
|                 | 1.5. The title page includes a short running head.                 |     |    |                |          |
|                 | 1.6. The title page includes a short running head.                 |     |    |                |          |
|                 | 1.7. The title page includes a short running head.                 |     |    |                |          |
|                 | 1.8. The title page includes a short running head.                 |     |    |                |          |
|                 | 1.9. The title page includes a short running head.                 |     |    |                |          |
|                 | 1.10. The title page includes a short running head.                |     |    |                |          |
| 2. Objectives   | 2.1. The objectives are clearly stated.                            |     |    |                |          |
|                 | 2.2. The objectives are clearly stated.                            |     |    |                |          |
|                 | 2.3. The objectives are clearly stated.                            |     |    |                |          |
|                 | 2.4. The objectives are clearly stated.                            |     |    |                |          |
|                 | 2.5. The objectives are clearly stated.                            |     |    |                |          |
|                 | 2.6. The objectives are clearly stated.                            |     |    |                |          |
|                 | 2.7. The objectives are clearly stated.                            |     |    |                |          |
|                 | 2.8. The objectives are clearly stated.                            |     |    |                |          |
|                 | 2.9. The objectives are clearly stated.                            |     |    |                |          |
|                 | 2.10. The objectives are clearly stated.                           |     |    |                |          |
| 3. Methods      | 3.1. The methods are clearly described.                            |     |    |                |          |
|                 | 3.2. The methods are clearly described.                            |     |    |                |          |
|                 | 3.3. The methods are clearly described.                            |     |    |                |          |
|                 | 3.4. The methods are clearly described.                            |     |    |                |          |
|                 | 3.5. The methods are clearly described.                            |     |    |                |          |
|                 | 3.6. The methods are clearly described.                            |     |    |                |          |
|                 | 3.7. The methods are clearly described.                            |     |    |                |          |
|                 | 3.8. The methods are clearly described.                            |     |    |                |          |
|                 | 3.9. The methods are clearly described.                            |     |    |                |          |
|                 | 3.10. The methods are clearly described.                           |     |    |                |          |
| 4. Results      | 4.1. The results are clearly presented.                            |     |    |                |          |
|                 | 4.2. The results are clearly presented.                            |     |    |                |          |
|                 | 4.3. The results are clearly presented.                            |     |    |                |          |
|                 | 4.4. The results are clearly presented.                            |     |    |                |          |
|                 | 4.5. The results are clearly presented.                            |     |    |                |          |
|                 | 4.6. The results are clearly presented.                            |     |    |                |          |
|                 | 4.7. The results are clearly presented.                            |     |    |                |          |
|                 | 4.8. The results are clearly presented.                            |     |    |                |          |
|                 | 4.9. The results are clearly presented.                            |     |    |                |          |
|                 | 4.10. The results are clearly presented.                           |     |    |                |          |
| 5. Discussion   | 5.1. The discussion is clearly presented.                          |     |    |                |          |
|                 | 5.2. The discussion is clearly presented.                          |     |    |                |          |
|                 | 5.3. The discussion is clearly presented.                          |     |    |                |          |
|                 | 5.4. The discussion is clearly presented.                          |     |    |                |          |
|                 | 5.5. The discussion is clearly presented.                          |     |    |                |          |
|                 | 5.6. The discussion is clearly presented.                          |     |    |                |          |
|                 | 5.7. The discussion is clearly presented.                          |     |    |                |          |
|                 | 5.8. The discussion is clearly presented.                          |     |    |                |          |
|                 | 5.9. The discussion is clearly presented.                          |     |    |                |          |
|                 | 5.10. The discussion is clearly presented.                         |     |    |                |          |
| 6. Conclusions  | 6.1. The conclusions are clearly stated.                           |     |    |                |          |
|                 | 6.2. The conclusions are clearly stated.                           |     |    |                |          |
|                 | 6.3. The conclusions are clearly stated.                           |     |    |                |          |
|                 | 6.4. The conclusions are clearly stated.                           |     |    |                |          |
|                 | 6.5. The conclusions are clearly stated.                           |     |    |                |          |
|                 | 6.6. The conclusions are clearly stated.                           |     |    |                |          |
|                 | 6.7. The conclusions are clearly stated.                           |     |    |                |          |
|                 | 6.8. The conclusions are clearly stated.                           |     |    |                |          |
|                 | 6.9. The conclusions are clearly stated.                           |     |    |                |          |
|                 | 6.10. The conclusions are clearly stated.                          |     |    |                |          |





1  
2  
3  
4  
5  
6  
7  
8  
9  
10  
11  
12  
13  
14  
15  
16  
17  
18  
19  
20  
21  
22  
23  
24  
25  
26  
27  
28  
29  
30  
31  
32  
33  
34  
35  
36  
37  
38  
39  
40  
41  
42  
43  
44  
45  
46  
47

| Section                                                                                                                   | Item | 1 | 2 | 3 | 4 | 5 | 6 | 7 | 8 | 9 | 10 | 11 | 12 | 13 | 14 | 15 | 16 | 17 | 18 | 19 | 20 | 21 | 22 | 23 | 24 | 25 | 26 | 27 | 28 | 29 | 30 | 31 | 32 | 33 | 34 | 35 | 36 | 37 | 38 | 39 | 40 | 41 | 42 | 43 | 44 | 45 | 46 | 47 |  |  |  |
|---------------------------------------------------------------------------------------------------------------------------|------|---|---|---|---|---|---|---|---|---|----|----|----|----|----|----|----|----|----|----|----|----|----|----|----|----|----|----|----|----|----|----|----|----|----|----|----|----|----|----|----|----|----|----|----|----|----|----|--|--|--|
| Table with 47 rows and 32 columns. The first column contains detailed text, and the remaining 31 columns are empty cells. |      |   |   |   |   |   |   |   |   |   |    |    |    |    |    |    |    |    |    |    |    |    |    |    |    |    |    |    |    |    |    |    |    |    |    |    |    |    |    |    |    |    |    |    |    |    |    |    |  |  |  |

For peer review only

1  
2  
3  
4  
5  
6  
7  
8  
9  
10  
11  
12  
13  
14  
15  
16  
17  
18  
19  
20  
21  
22  
23  
24  
25  
26  
27  
28  
29  
30  
31  
32  
33  
34  
35  
36  
37  
38  
39  
40  
41  
42  
43  
44  
45  
46  
47

| Section | Item | 1 | 2 | 3 | 4 | 5 | 6 | 7 | 8  | 9  | 10 | 11 | 12 | 13 | 14 | 15 | 16 | 17 | 18 | 19 | 20 | 21 | 22 | 23 | 24 | 25 | 26 | 27 | 28 | 29 | 30 | 31 | 32 | 33 | 34 | 35 | 36 | 37 | 38 | 39 | 40 | 41 | 42 | 43 | 44 | 45 | 46 | 47 |
|---------|------|---|---|---|---|---|---|---|----|----|----|----|----|----|----|----|----|----|----|----|----|----|----|----|----|----|----|----|----|----|----|----|----|----|----|----|----|----|----|----|----|----|----|----|----|----|----|----|
| 1       | 2    | 3 | 4 | 5 | 6 | 7 | 8 | 9 | 10 | 11 | 12 | 13 | 14 | 15 | 16 | 17 | 18 | 19 | 20 | 21 | 22 | 23 | 24 | 25 | 26 | 27 | 28 | 29 | 30 | 31 | 32 | 33 | 34 | 35 | 36 | 37 | 38 | 39 | 40 | 41 | 42 | 43 | 44 | 45 | 46 | 47 |    |    |

For peer review only

1  
2  
3  
4  
5  
6  
7  
8  
9  
10  
11  
12  
13  
14  
15  
16  
17  
18  
19  
20  
21  
22  
23  
24  
25  
26  
27  
28  
29  
30  
31  
32  
33  
34  
35  
36  
37  
38  
39  
40  
41  
42  
43  
44  
45  
46  
47

| Section                | Item                                                              | Yes | No | Not applicable |
|------------------------|-------------------------------------------------------------------|-----|----|----------------|
| 1. Aims and objectives | 1.1 The aims and objectives are clearly stated and measurable     |     |    |                |
|                        | 1.2 The aims and objectives are relevant to the clinical practice |     |    |                |
| 2. Rationale           | 2.1 The rationale for the study is clearly stated                 |     |    |                |
|                        | 2.2 The rationale is based on current evidence                    |     |    |                |
| 3. Methods             | 3.1 The study design is appropriate                               |     |    |                |
|                        | 3.2 The methods are clearly described                             |     |    |                |
| 4. Results             | 4.1 The results are clearly presented                             |     |    |                |
|                        | 4.2 The results are supported by evidence                         |     |    |                |
| 5. Discussion          | 5.1 The discussion is clearly presented                           |     |    |                |
|                        | 5.2 The discussion is based on current evidence                   |     |    |                |
| 6. Conclusion          | 6.1 The conclusion is clearly stated                              |     |    |                |
|                        | 6.2 The conclusion is based on current evidence                   |     |    |                |

For peer review only





**Supplementary File 5: Bibliographic details of 63 studies containing some information regarding identity of and/or consent by organ sources/donors.**

**Note: these 63 studies are a subset of the 445 papers reported in the study and their details are also included in Supplementary file 3.**

1. Chen J, Wang Y, Shen Z, et al. Early diagnostic value of plasma PCT and BG assay for CRBSI after OLT. *Transplant Proc* 2011;43(5):1777-79 Online First.
2. Chen Y, Zhang H, Xiao X, et al. Peripheral blood transcriptome sequencing reveals rejection-relevant genes in long-term heart transplantation. *Int J Cardiol* 2013;168(3):2726-33 doi: 10.1016/j.ijcard.2013.03.095 published Online First.
3. Chen YB, Li SD, Ju BL, et al. Suitable calcineurin inhibitor concentrations for liver transplant recipients in the Chinese population. *Transplant Proc* 2011;43(5):1751-53 doi: 10.1016/j.transproceed.2010.11.025 published Online First.
4. Chen Z, Gong R, Luo Y, et al. Surgical procedures for hepatolithiasis. *Hepatogastroenterology* 2010;57(97):134-7 Online First.
5. Chen ZY, Yan LN, Zeng Y, et al. Preliminary experience with indications for liver transplantation for hepatolithiasis. *Transplant Proc* 2008;40(10):3517-22 doi: 10.1016/j.transproceed.2008.07.142 published Online First.
6. Chu Z, Zhang J, Zhao Y, et al. Influence of immunosuppressive drugs on the development of CD4<sup>+</sup>CD25<sup>high</sup>Foxp3<sup>+</sup> T cells in liver transplant recipients. *Transplant Proc* 2010;42(7):2599-601 doi: 10.1016/j.transproceed.2010.04.026 published Online First.
7. Fan J, Yang GS, Fu ZR, et al. Liver transplantation outcomes in 1,078 hepatocellular carcinoma patients: A multi-center experience in Shanghai, China. *J Cancer Res Clin Oncol* 2009;135(10):1403-12 doi: 10.1007/s00432-009-0584-6 published Online First.
8. Fan X, Chen Z, Nasralla D, et al. The organ preservation and enhancement of donation success ratio effect of extracorporeal membrane oxygenation in circulatory unstable brain death donor. *Clin Transplant* 2016;30(10):1306-13 Online First.
9. Gao Y, Ren H, Meng F, et al. Pathological roles of interleukin-22 in the development of recurrent hepatitis C after liver transplantation. *PLoS One* 2016;11(4) doi: 10.1371/journal.pone.0154419 published Online First.
10. Gao Y, Zhang M, Li J, et al. Circulating FoxP3<sup>+</sup> regulatory T and interleukin17-producing Th17 cells actively influence HBV clearance in De Novo Hepatitis B virus infected patients after orthotopic liver transplantation. *PLoS One* 2015;10(9) doi: 10.1371/journal.pone.0137881 published Online First.

11. Gao YJ, Zhang M, Jin B, et al. A clinical-pathological analysis of hepatitis B virus recurrence after liver transplantation in Chinese patients. *Journal of Gastroenterology and Hepatology (Australia)* 2014;29(3):554-60 doi: 10.1111/jgh.12404 published Online First.
12. Gu L, Yu YC. Clinical outcome of dental implants placed in liver transplant recipients after 3 years: A case series. *Transplant Proc* 2011;43(7):2678-82 doi: 10.1016/j.transproceed.2011.06.037 published Online First.
13. Gu Y, Li J, Li N. Insulin sensitivity after pancreaticoduodenal transplantation with systemic and portal venous drainage in inbred rats. *Chin Med J* 2002;115(4):549-51 Online First.
14. Hu XX, Yan LN. Retrospective analysis of prognostic factors after liver transplantation for intrahepatic cholangiocarcinoma in China: A single-center experience. *Hepatogastroenterology* 2011;58(109):1255-59 doi: 10.5754/hge10704 published Online First.
15. Jiang L, Lei JY, Wang WT, et al. Immediate radical therapy or conservative treatments when meeting the Milan criteria for advanced HCC patients after successful TACE. *J Gastrointest Surg* 2014;18(6):1125-30 Online First.
16. Lei J, Yan L. Outcome comparisons among the Hangzhou, Chengdu, and UCSF criteria for hepatocellular carcinoma liver transplantation after successful downstaging therapies. *J Gastrointest Surg* 2013;17(6):1116-22 doi: 10.1007/s11605-013-2140-6 published Online First.
17. Lei JY, Wang WT, Yan LN. Hangzhou criteria for liver transplantation in hepatocellular carcinoma: A single-center experience. *Eur J Gastroenterol Hepatol* 2014;26(2):200-04 doi: 10.1097/MEG.0b013e3283652b66 published Online First.
18. Lei JY, Yan LN, Wang WT, et al. Health-related quality of life and psychological distress in patients with early-stage hepatocellular carcinoma after hepatic resection or transplantation. *Transplant Proc* 2016;48(6):2107-11 Online First.
19. Li F, Yang M, Li B, et al. Initial clinical results of orthotopic liver transplantation for hepatic alveolar echinococcosis. *Liver Transpl* 2007;13(6):924-26 doi: 10.1002/lt.21187 published Online First.
20. Li H, He JW, Fu BS, et al. Immunosuppressant-related hip pain after orthotopic liver transplant. *Exp Clin Transplant* 2013;11(1):32-38 doi: 10.6002/ect.2012.0026 published Online First.
21. Li H, Li J, Wang Y, et al. Proteomic analysis of effluents from perfused human heart for transplantation: Identification of potential biomarkers for ischemic heart damage. *Proteome Science* 2012;10(1) doi: 10.1186/1477-5956-10-21 published Online First.
22. Li J, Liu B, Yan LN, et al. Reversal of graft steatosis after liver transplantation: prospective study. *Transplant Proc* 2009;41(9):3560-63 doi: 10.1016/j.transproceed.2009.06.222 published Online First.

- 1  
2  
3  
4 23. Li WX, Li Z, Gao PJ, et al. Histological differentiation predicts post-liver transplantation  
5 survival time. *Clinics and Research in Hepatology and Gastroenterology* 2014;38(2):201-08 doi:  
6 10.1016/j.clinre.2013.11.002published Online First.  
7  
8  
9 24. Lin B, Geng L, Zheng Z, et al. The predictive value of blood neutrophil-lymphocyte ratio  
10 in patients with end-stage liver cirrhosis following ABO-incompatible liver transplantation. *J Res*  
11 *Med Sci* 2016;21(5):20-25 Online First.  
12  
13 25. Lin XH, Teng S, Wang L, et al. Fatigue and its associated factors in liver transplant  
14 recipients in Beijing: A cross-sectional study. *BMJ Open* 2017;7 (2) Online First.  
15  
16 26. Ling Q, Xie H, Li J, et al. Donor graft microRNAs: A newly identified player in the  
17 development of new-onset diabetes after liver transplantation. *Am J Transplant* 2017;17(1):255-  
18 64 Online First.  
19  
20 27. Ling Q, Xie H, Lu D, et al. Association between donor and recipient TCF7L2 gene  
21 polymorphisms and the risk of new-onset diabetes mellitus after liver transplantation in a Han  
22 Chinese population. *J Hepatol* 2013;58(2):271-77 doi: 10.1016/j.jhep.2012.09.025published  
23 Online First.  
24  
25 28. Ling Q, Xu X, Wang K, et al. Donor PPAR $\gamma$  Gene polymorphisms influence the  
26 susceptibility to glucose and lipid disorders in liver transplant recipients. *Medicine (United*  
27 *States)* 2015;94(35):e1421 doi: 10.1097/MD.0000000000001421published Online First.  
28  
29 29. Liu C, Tsai HL, Chin T, et al. Experience of surgical treatment for hepatoblastoma.  
30 *Formosan Journal of Surgery* 2016;49(2):56-62 Online First.  
31  
32 30. Liu S, Bai Y, Huang J, et al. Do mitochondria contribute to left ventricular non-  
33 compaction cardiomyopathy? New findings from myocardium of patients with left ventricular  
34 non-compaction cardiomyopathy. *Mol Genet Metab* 2013;109(1):100-06 Online First.  
35  
36 31. Liu X, Wang B, Zhang X, et al. Liver transplantation using donation after brain and  
37 cardiac death: A single-center experience in China. *Transplant Proc* 2016;48(6):1879-86 Online  
38 First.  
39  
40 32. Liu Y, Liu YY, Li CP, et al. Comprehensive comparison of three different  
41 immunosuppressive regimens for liver transplant patients with hepatocellular carcinoma:  
42 Steroid-free immunosuppression, induction immunosuppression and standard  
43 immunosuppression. *PLoS One* 2015;10 (3) Online First.  
44  
45 33. Lu D, Xu X, Wang J, et al. The influence of a contemporaneous portal and hepatic artery  
46 revascularization protocol on biliary complications after liver transplantation. *Surgery (United*  
47 *States)* 2014;155(1):190-95 doi: 10.1016/j.surg.2013.06.056published Online First.  
48  
49  
50  
51  
52  
53  
54  
55  
56  
57  
58  
59  
60

- 1  
2  
3 34. Mu HJ, Xie P, Chen JY, et al. Association of TNF- $\alpha$ , TGF- $\beta$ 1, IL-10, IL-6, and IFN- $\gamma$   
4 gene polymorphism with acute rejection and infection in lung transplant recipients. *Clin*  
5 *Transplant* 2014;28(9):1016-24 doi: 10.1111/ctr.12411 published Online First.  
6  
7  
8 35. Pan C, Shi Y, Zhang JJ, et al. Single-Center experience of 253 portal vein thrombosis  
9 patients undergoing liver transplantation in China. *Transplant Proc* 2009;41(9):3761-65 doi:  
10.1016/j.transproceed.2009.06.215 published Online First.  
10  
11  
12 36. Ran JH, Zhang SN, Liu J, et al. In-hospital and follow-up outcomes of patients  
13 undergoing orthotopic liver transplantation after hepatic artery reconstruction with an iliac  
14 interposition graft. *Int J Clin Exp Med* 2016;9(2):3939-45 Online First.  
15  
16  
17 37. Sun XY, Dong JH, Qin K, et al. Single center study on transplantation of livers donated  
18 after cardiac death: A report of 6 cases. *Exp Ther Med* 2016;11(3):988-92 doi:  
19 10.3892/etm.2016.3001 published Online First.  
20  
21  
22 38. Wang SY, Tang HM, Chen GQ, et al. Effect of ursodeoxycholic acid administration after  
23 liver transplantation on serum liver tests and biliary complications: A randomized clinical trial.  
24 *Digestion* 2012;86(3):208-17 doi: 10.1159/000339711 published Online First.  
25  
26  
27 39. Wang Y, Liu Y, Han R, et al. Monitoring of CD95 and CD38 expression in peripheral  
28 blood T lymphocytes during active human cytomegalovirus infection after orthotopic liver  
29 transplantation. *Journal of Gastroenterology and Hepatology (Australia)* 2010;25(1):138-42 doi:  
30 10.1111/j.1440-1746.2009.05966.x published Online First.  
31  
32 40. Wang Y, Shen Z, Zhu Z, et al. Clinical values of AFP, GPC3 mRNA in peripheral blood  
33 for prediction of hepatocellular carcinoma recurrence following OLT. *Hepatitis Monthly*  
34 2011;11(3):195-99 Online First.  
35  
36  
37 41. Xiao L, Fu ZR, Ding GS, et al. Prediction of survival after liver transplantation for  
38 chronic severe hepatitis b based on preoperative prognostic scores: A single center's experience  
39 in China. *World J Surg* 2009;33(11):2420-26 doi: 10.1007/s00268-009-0183-3 published Online  
40 First.  
41  
42  
43 42. Xu J, Shen ZY, Chen XG, et al. A randomized controlled trial of licartin for preventing  
44 hepatoma recurrence after liver transplantation. *Hepatology* 2007;45(2):269-76 doi:  
45 10.1002/hep.21465 published Online First.  
46  
47  
48 43. Xu X, Guo HJ, Xie HY, et al. ZIP4, a novel determinant of tumor invasion in  
49 hepatocellular carcinoma, contributes to tumor recurrence after liver transplantation. *Int J Biol*  
50 *Sci* 2014;10(3):245-56 doi: 10.7150/ijbs.7401 published Online First.  
51  
52  
53 44. Xu X, Ling Q, Gao F, et al. Hepatoprotective effects of marine and kuhuang in liver  
54 transplant recipients. *Am J Chin Med* 2009;37(1):27-34 Online First.  
55  
56  
57  
58  
59

- 1  
2  
3 45. Xu X, Ling Q, Wang J, et al. Donor miR-196a-2 polymorphism is associated with  
4 hepatocellular carcinoma recurrence after liver transplantation in a Han Chinese population. *Int J*  
5 *Cancer* 2016;138(3):620-29 Online First.  
6  
7  
8 46. Xu X, Ling Q, Zhang M, et al. Outcome of patients with hepatorenal syndrome type 1  
9 after liver transplantation: Hangzhou experience. *Transplantation* 2009;87(10):1514-19 doi:  
10.1097/TP.0b013e3181a4430b published Online First.  
10  
11  
12 47. Xu X, Liu X, Ling Q, et al. Artificial liver support system combined with liver  
13 transplantation in the treatment of patients with acute-on-chronic liver failure. *PLoS One*  
14 2013;8(3) doi: 10.1371/journal.pone.0058738 published Online First.  
15  
16  
17 48. Xu X, Tu Z, Wang B, et al. A novel model for evaluating the risk of hepatitis B  
18 recurrence after liver transplantation. *Liver International* 2011;31(10):1477-84 doi:  
19 10.1111/j.1478-3231.2011.02500.x published Online First.  
20  
21  
22 49. Xue F, Higgs BW, Huang J, et al. HERC5 is a prognostic biomarker for post-liver  
23 transplant recurrent human hepatocellular carcinoma. *J Transl Med* 2015;13(1) doi:  
24 10.1186/s12967-015-0743-2 published Online First.  
25  
26  
27 50. Yan L, Li B, Wen T, et al. Prophylaxis Against hepatitis B recurrence posttransplantation  
28 using lamivudine and individualized low-dose hepatitis B immunoglobulin. *Am J Transplant*  
29 2010;10(8):1861-69 Online First.  
30  
31  
32 51. Yang X, Lu Q, Tang T, et al. Prediction of the prognosis after liver transplantation in  
33 severe hepatitis B-induced liver failure and clinical decision for liver transplantation. *J Surg Res*  
34 2013;183(2):846-51 doi: 10.1016/j.jss.2013.01.034 published Online First.  
35  
36  
37 52. Yu S, Yu J, Zhang W, et al. Safe use of liver grafts from hepatitis B surface antigen  
38 positive donors in liver transplantation. *J Hepatol* 2014;61(4):809-15 Online First.  
39  
40  
41 53. Yu Z, Sun Z, Yu S, et al. Safety limitations of fatty liver transplantation can be extended  
42 to 40%: Experience of a single centre in China. *Liver International* 2016 Online First.  
43  
44  
45 54. Yuan X, Chen C, Zhou J, et al. Organ donation and transplantation from donors with  
46 systemic infection: A single-center experience. *Transplant Proc* 2016;48(7):2454-57 Online First.  
47  
48  
49 55. Yuefeng M, Weili F, Wenxiang T, et al. Long-term outcome of patients with lamivudine  
50 after early cessation of hepatitis B immunoglobulin for prevention of recurrent hepatitis B  
51 following liver transplantation. *Clin Transplant* 2011;25(4):517-22 Online First.  
52  
53  
54 56. Zhang D, Jiao Z, Han J, et al. Clinicopathological features of hepatitis B virus recurrence  
55 after liver transplantation: Eleven-year experience. *Int J Clin Exp Pathol* 2014;7(7):4057-66  
56  
57  
58  
59  
60

- 1  
2  
3 57. Zhang M, Yin F, Chen B, et al. Mortality risk after liver transplantation in hepatocellular  
4 carcinoma recipients: A nonlinear predictive model. *Surgery (United States)* 2012;151(6):889-97  
5 doi: 10.1016/j.surg.2011.12.034published Online First.  
6  
7  
8 58. Zhang M, Yin F, Chen B, et al. Pretransplant prediction of posttransplant survival for  
9 liver recipients with benign end-stage liver diseases: A nonlinear model. *PLoS One* 2012;7 (3)  
10 Online First.  
11  
12 59. Zhang Y, Yan L, Wen T, et al. Prophylaxis against hepatitis B virus recurrence after liver  
13 transplantation for hepatitis B virus-related end-stage liver diseases with severe hypersplenism  
14 and splenomegaly: Role of splenectomy. *J Surg Res* 2012;178(1):478-86 doi:  
15 10.1016/j.jss.2012.02.047published Online First.  
16  
17  
18 60. Zhong L, Li H, Li Z, et al. C7 genotype of the donor may predict early bacterial infection  
19 after liver transplantation. *Sci Rep* 2016;6:24121 Online First.  
20  
21  
22 61. Zhu M, Li Y, Xia Q, et al. Strong impact of acute kidney injury on survival after liver  
23 transplantation. *Transplant Proc* 2010;42(9):3634-38 doi:  
24 10.1016/j.transproceed.2010.08.059published Online First.  
25  
26  
27 62. Zhu XS, Gao YH, Wang SS, et al. Contrast-enhanced ultrasound diagnosis of splenic  
28 artery steal syndrome after orthotopic liver transplantation. *Liver Transpl* 2012;18(8):966-71 doi:  
29 10.1002/lt.23453published Online First.  
30  
31 63. Zhu XS, Wang SS, Cheng Q, et al. Using ultrasonography to monitor liver blood flow for  
32 liver transplant from donors supported on extracorporeal membrane oxygenation. *Liver Transpl*  
33 2016;22(2):188-91 doi: 10.1002/lt.24318published Online First.  
34  
35  
36  
37  
38  
39  
40  
41  
42  
43  
44  
45  
46  
47  
48  
49  
50  
51  
52  
53  
54  
55  
56  
57  
58  
59  
60

**Supplementary File 6: Full list of journals included in the study and number of papers per journal**

| Journal                                                     | Number |
|-------------------------------------------------------------|--------|
| Transplantation Proceedings                                 | 65     |
| PLoS ONE                                                    | 20     |
| Clinical Transplantation                                    | 16     |
| Liver Transplantation                                       | 15     |
| Hepato-Gastroenterology                                     | 14     |
| Experimental and Clinical Transplantation                   | 11     |
| Clinics and Research in Hepatology and Gastroenterology     | 8      |
| International Journal of Clinical and Experimental Medicine | 8      |
| Annals of Transplantation                                   | 7      |
| International Journal of Clinical Practice                  | 6      |
| Journal of Cancer Research and Clinical Oncology            | 6      |
| Transplantation                                             | 6      |
| European Journal of Gastroenterology and Hepatology         | 5      |
| Experimental and Therapeutic Medicine                       | 5      |
| Medical Oncology                                            | 5      |
| Medicine (United States)                                    | 5      |
| Surgery (United States)                                     | 5      |



|                                                        |   |
|--------------------------------------------------------|---|
| BMC Cancer                                             | 4 |
| European Journal of Clinical Pharmacology              | 4 |
| Genetics and Molecular Research                        | 4 |
| Hepatology International                               | 4 |
| Journal of Gastrointestinal Surgery                    | 4 |
| Journal of International Medical Research              | 4 |
| Liver International                                    | 4 |
| Oncotarget                                             | 4 |
| Therapeutic Drug Monitoring                            | 4 |
| Biomarkers                                             | 3 |
| Cytokine                                               | 3 |
| Gene                                                   | 3 |
| International Journal of Medical Sciences              | 3 |
| Journal of Gastroenterology and Hepatology (Australia) | 3 |
| Journal of Hepatology                                  | 3 |
| Journal of Surgical Research                           | 3 |
| Scientific Reports                                     | 3 |
| Transplant Infectious Disease                          | 3 |
| World Journal of Surgery                               | 3 |

|    |                                                      |   |
|----|------------------------------------------------------|---|
| 1  |                                                      |   |
| 2  |                                                      |   |
| 3  |                                                      |   |
| 4  | Abdominal Imaging                                    | 2 |
| 5  |                                                      |   |
| 6  | American Journal of Transplantation                  | 2 |
| 7  |                                                      |   |
| 8  | Annals of Surgical Oncology                          | 2 |
| 9  |                                                      |   |
| 10 | Archives of Medical Research                         | 2 |
| 11 |                                                      |   |
| 12 | Asian Pacific Journal of Cancer Prevention           | 2 |
| 13 |                                                      |   |
| 14 | BioMed Research International                        | 2 |
| 15 |                                                      |   |
| 16 | BMC Infectious Diseases                              | 2 |
| 17 |                                                      |   |
| 18 | Brazilian Journal of Medical and Biological Research | 2 |
| 19 |                                                      |   |
| 20 | British Journal of Radiology                         | 2 |
| 21 |                                                      |   |
| 22 | Cancer Letters                                       | 2 |
| 23 |                                                      |   |
| 24 | Clinical Chemistry and Laboratory Medicine           | 2 |
| 25 |                                                      |   |
| 26 | Clinical Imaging                                     | 2 |
| 27 |                                                      |   |
| 28 | Digestion                                            | 2 |
| 29 |                                                      |   |
| 30 | Digestive Diseases and Sciences                      | 2 |
| 31 |                                                      |   |
| 32 | European Journal of Radiology                        | 2 |
| 33 |                                                      |   |
| 34 | European Surgical Research                           | 2 |
| 35 |                                                      |   |
| 36 | Hepatitis Monthly                                    | 2 |
| 37 |                                                      |   |
| 38 | Hepatology                                           | 2 |
| 39 |                                                      |   |
| 40 | Hepatology Research                                  | 2 |
| 41 |                                                      |   |
| 42 |                                                      |   |
| 43 |                                                      |   |
| 44 |                                                      |   |
| 45 |                                                      |   |
| 46 |                                                      |   |
| 47 |                                                      |   |
| 48 |                                                      |   |
| 49 |                                                      |   |
| 50 |                                                      |   |
| 51 |                                                      |   |
| 52 |                                                      |   |
| 53 |                                                      |   |
| 54 |                                                      |   |
| 55 |                                                      |   |
| 56 |                                                      |   |
| 57 |                                                      |   |
| 58 |                                                      |   |
| 59 |                                                      |   |
| 60 |                                                      |   |

|    |                                                                 |   |
|----|-----------------------------------------------------------------|---|
| 1  |                                                                 |   |
| 2  |                                                                 |   |
| 3  |                                                                 |   |
| 4  | Immunopharmacology and Immunotoxicology                         | 2 |
| 5  |                                                                 |   |
| 6  | International Journal of Clinical Pharmacology and Therapeutics | 2 |
| 7  |                                                                 |   |
| 8  | Journal of Cardiothoracic Surgery                               | 2 |
| 9  |                                                                 |   |
| 10 | Journal of Immunology Research                                  | 2 |
| 11 |                                                                 |   |
| 12 | Journal of Surgical Oncology                                    | 2 |
| 13 |                                                                 |   |
| 14 | Latin American Journal of Pharmacy                              | 2 |
| 15 |                                                                 |   |
| 16 | Medical Science Monitor                                         | 2 |
| 17 |                                                                 |   |
| 18 | Microbial Ecology                                               | 2 |
| 19 |                                                                 |   |
| 20 | OncoTargets and Therapy                                         | 2 |
| 21 |                                                                 |   |
| 22 | Pharmacogenomics                                                | 2 |
| 23 |                                                                 |   |
| 24 | Postgraduate Medical Journal                                    | 2 |
| 25 |                                                                 |   |
| 26 | Surgery Today                                                   | 2 |
| 27 |                                                                 |   |
| 28 | Therapeutics and Clinical Risk Management                       | 2 |
| 29 |                                                                 |   |
| 30 | Transplant Immunology                                           | 2 |
| 31 |                                                                 |   |
| 32 | Tumor Biology                                                   | 2 |
| 33 |                                                                 |   |
| 34 | World Journal of Surgical Oncology                              | 2 |
| 35 |                                                                 |   |
| 36 | Acta Anaesthesiologica Scandinavica                             | 1 |
| 37 |                                                                 |   |
| 38 | Acta Cardiologica                                               | 1 |
| 39 |                                                                 |   |
| 40 | Alcohol                                                         | 1 |
| 41 |                                                                 |   |
| 42 |                                                                 |   |
| 43 |                                                                 |   |
| 44 |                                                                 |   |
| 45 |                                                                 |   |
| 46 |                                                                 |   |
| 47 |                                                                 |   |
| 48 |                                                                 |   |
| 49 |                                                                 |   |
| 50 |                                                                 |   |
| 51 |                                                                 |   |
| 52 |                                                                 |   |
| 53 |                                                                 |   |
| 54 |                                                                 |   |
| 55 |                                                                 |   |
| 56 |                                                                 |   |
| 57 |                                                                 |   |
| 58 |                                                                 |   |
| 59 |                                                                 |   |
| 60 |                                                                 |   |

|                                                     |   |
|-----------------------------------------------------|---|
| American Journal of Chinese Medicine                | 1 |
| American Journal of Roentgenology                   | 1 |
| Annals of Hepatology                                | 1 |
| ASAIO Journal                                       | 1 |
| Asian Journal of Andrology                          | 1 |
| Biochemical and Biophysical Research Communications | 1 |
| Biomedicine and Pharmacotherapy                     | 1 |
| BMC Gastroenterology                                | 1 |
| BMC neurology                                       | 1 |
| BMJ Open                                            | 1 |
| Brain Imaging and Behavior                          | 1 |
| Brain Research                                      | 1 |
| Cancer Biology & Therapy                            | 1 |
| Cancer Biology and Therapy                          | 1 |
| Cancer Gene Therapy                                 | 1 |
| CardioVascular and Interventional Radiology         | 1 |
| Cell Biochemistry and Biophysics                    | 1 |
| Clinica Chimica Acta                                | 1 |
| Clinical and Developmental Immunology               | 1 |

|                                                          |   |
|----------------------------------------------------------|---|
| Clinical and Experimental Metastasis                     | 1 |
| Clinical Cancer Research                                 | 1 |
| Clinical Genetics                                        | 1 |
| Clinical Laboratory                                      | 1 |
| Clinical Pharmacokinetics                                | 1 |
| Clinical Therapeutics                                    | 1 |
| Clinical transplants                                     | 1 |
| Cytotherapy                                              | 1 |
| Diagnostic Pathology                                     | 1 |
| Digestive and Liver Disease                              | 1 |
| Digestive Surgery                                        | 1 |
| Disease Markers                                          | 1 |
| Drug Metabolism and Pharmacokinetics                     | 1 |
| European Journal of Medical Research                     | 1 |
| European Journal of Pharmaceutical Sciences              | 1 |
| European Review for Medical and Pharmacological Sciences | 1 |
| Focus on Alternative and Complementary Therapies         | 1 |
| Formosan Journal of Surgery                              | 1 |
| Gut and Liver                                            | 1 |

|                                                              |   |
|--------------------------------------------------------------|---|
| Human Vaccines and Immunotherapeutics                        | 1 |
| Interactive Cardiovascular and Thoracic Surgery              | 1 |
| International Anesthesiology Clinics                         | 1 |
| International Immunopharmacology                             | 1 |
| International Journal of Biological Sciences                 | 1 |
| International Journal of Cancer                              | 1 |
| International Journal of Cardiology                          | 1 |
| International Journal of Clinical & Experimental Pathology   | 1 |
| International Journal of Clinical and Experimental Pathology | 1 |
| International Journal of Clinical Oncology                   | 1 |
| International Journal of Hyperthermia                        | 1 |
| International Journal of Immunogenetics                      | 1 |
| Investigational New Drugs                                    | 1 |
| Journal of Cardiovascular Surgery                            | 1 |
| Journal of Clinical Nursing                                  | 1 |
| Journal of Clinical Pharmacology                             | 1 |
| Journal of Clinical Pharmacy and Therapeutics                | 1 |
| Journal of Clinical Virology                                 | 1 |
| Journal of Critical Care                                     | 1 |

|                                                    |   |
|----------------------------------------------------|---|
| Journal of Diabetes Investigation                  | 1 |
| Journal of Diabetes.                               | 1 |
| Journal of Gastrointestinal and Liver Diseases     | 1 |
| Journal of Hepato-Biliary-Pancreatic Sciences      | 1 |
| Journal of Infection                               | 1 |
| Journal of Nanoscience and Nanotechnology          | 1 |
| Journal of Occupational and Environmental Medicine | 1 |
| Journal of Parenteral and Enteral Nutrition        | 1 |
| Journal of Research in Medical Sciences            | 1 |
| Journal of Thoracic and Cardiovascular Surgery     | 1 |
| Journal of Thoracic Disease                        | 1 |
| Journal of Translational Medicine                  | 1 |
| Journal of Ultrasound in Medicine                  | 1 |
| Journal of Vascular and Interventional Radiology   | 1 |
| Journal of Virological Methods                     | 1 |
| Korean Journal of Radiology                        | 1 |
| Liver International.                               | 1 |
| Mediators of Inflammation                          | 1 |
| Medicinal Chemistry                                | 1 |

|    |                                                               |   |
|----|---------------------------------------------------------------|---|
| 1  |                                                               |   |
| 2  |                                                               |   |
| 3  |                                                               |   |
| 4  | Metabolic Brain Disease                                       | 1 |
| 5  |                                                               |   |
| 6  |                                                               |   |
| 7  | Minerva Anestesiologica                                       | 1 |
| 8  |                                                               |   |
| 9  |                                                               |   |
| 10 | Molecular Carcinogenesis                                      | 1 |
| 11 |                                                               |   |
| 12 |                                                               |   |
| 13 | Molecular Genetics and Metabolism                             | 1 |
| 14 |                                                               |   |
| 15 |                                                               |   |
| 16 | Molecular Oncology                                            | 1 |
| 17 |                                                               |   |
| 18 |                                                               |   |
| 19 | Pakistan Journal of Medical Sciences                          | 1 |
| 20 |                                                               |   |
| 21 |                                                               |   |
| 22 | Pediatric Transplantation                                     | 1 |
| 23 |                                                               |   |
| 24 |                                                               |   |
| 25 | Pharmacology                                                  | 1 |
| 26 |                                                               |   |
| 27 |                                                               |   |
| 28 | Pharmazie                                                     | 1 |
| 29 |                                                               |   |
| 30 |                                                               |   |
| 31 | PLoS ONE [Electronic Resource]                                | 1 |
| 32 |                                                               |   |
| 33 |                                                               |   |
| 34 | Proteome Science                                              | 1 |
| 35 |                                                               |   |
| 36 |                                                               |   |
| 37 | Renal Failure                                                 | 1 |
| 38 |                                                               |   |
| 39 |                                                               |   |
| 40 | Respiratory Care                                              | 1 |
| 41 |                                                               |   |
| 42 |                                                               |   |
| 43 | Scandinavian Journal of Clinical and Laboratory Investigation | 1 |
| 44 |                                                               |   |
| 45 |                                                               |   |
| 46 | Surgical Practice                                             | 1 |
| 47 |                                                               |   |
| 48 |                                                               |   |
| 49 | Thrombosis Research                                           | 1 |
| 50 |                                                               |   |
| 51 |                                                               |   |
| 52 | Transplant International                                      | 1 |
| 53 |                                                               |   |
| 54 |                                                               |   |
| 55 | Tumori                                                        | 1 |
| 56 |                                                               |   |
| 57 |                                                               |   |
| 58 | Turkish Journal of Gastroenterology                           | 1 |
| 59 |                                                               |   |
| 60 |                                                               |   |



|    |                                    |   |
|----|------------------------------------|---|
| 1  |                                    |   |
| 2  |                                    |   |
| 3  |                                    |   |
| 4  | Ultrasound in Medicine and Biology | 1 |
| 5  |                                    |   |
| 6  | Viral Immunology                   | 1 |
| 7  |                                    |   |
| 8  |                                    |   |
| 9  |                                    |   |
| 10 | World Journal of Pediatrics        | 1 |
| 11 |                                    |   |
| 12 |                                    |   |
| 13 | Xenobiotica                        | 1 |
| 14 |                                    |   |
| 15 |                                    |   |
| 16 |                                    |   |
| 17 |                                    |   |
| 18 |                                    |   |
| 19 |                                    |   |
| 20 |                                    |   |
| 21 |                                    |   |
| 22 |                                    |   |
| 23 |                                    |   |
| 24 |                                    |   |
| 25 |                                    |   |
| 26 |                                    |   |
| 27 |                                    |   |
| 28 |                                    |   |
| 29 |                                    |   |
| 30 |                                    |   |
| 31 |                                    |   |
| 32 |                                    |   |
| 33 |                                    |   |
| 34 |                                    |   |
| 35 |                                    |   |
| 36 |                                    |   |
| 37 |                                    |   |
| 38 |                                    |   |
| 39 |                                    |   |
| 40 |                                    |   |
| 41 |                                    |   |
| 42 |                                    |   |
| 43 |                                    |   |
| 44 |                                    |   |
| 45 |                                    |   |
| 46 |                                    |   |
| 47 |                                    |   |
| 48 |                                    |   |
| 49 |                                    |   |
| 50 |                                    |   |
| 51 |                                    |   |
| 52 |                                    |   |
| 53 |                                    |   |
| 54 |                                    |   |
| 55 |                                    |   |
| 56 |                                    |   |
| 57 |                                    |   |
| 58 |                                    |   |
| 59 |                                    |   |
| 60 |                                    |   |

For peer review only

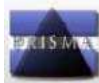

# PRISMA 2009 Checklist

| Section/topic             | # | Checklist item                                                                                                                                                                                                                                                                                              | Reported on page #                                                               |
|---------------------------|---|-------------------------------------------------------------------------------------------------------------------------------------------------------------------------------------------------------------------------------------------------------------------------------------------------------------|----------------------------------------------------------------------------------|
| <b>TITLE</b>              |   |                                                                                                                                                                                                                                                                                                             |                                                                                  |
| Title                     | 1 | Identify the report as a systematic review, meta-analysis, or both.                                                                                                                                                                                                                                         | Identified as a scoping report, Title page                                       |
| <b>ABSTRACT</b>           |   |                                                                                                                                                                                                                                                                                                             |                                                                                  |
| Structured summary        | 2 | Provide a structured summary including, as applicable: background; objectives; data sources; study eligibility criteria, participants, and interventions; study appraisal and synthesis methods; results; limitations; conclusions and implications of key findings; systematic review registration number. | Structured summary included; study not registered                                |
| <b>INTRODUCTION</b>       |   |                                                                                                                                                                                                                                                                                                             |                                                                                  |
| Rationale                 | 3 | Describe the rationale for the review in the context of what is already known.                                                                                                                                                                                                                              | See p.2,3                                                                        |
| Objectives                | 4 | Provide an explicit statement of questions being addressed with reference to participants, interventions, comparisons, outcomes, and study design (PICOS).                                                                                                                                                  | Not applicable as this is not a comparative study.<br>Research question on p. 5. |
| <b>METHODS</b>            |   |                                                                                                                                                                                                                                                                                                             |                                                                                  |
| Protocol and registration | 5 | Indicate if a review protocol exists, if and where it can be accessed (e.g., Web address), and, if available, provide registration information including registration number.                                                                                                                               | There is no published protocol for this study                                    |
| Eligibility criteria      | 6 | Specify study characteristics (e.g., PICOS, length of follow-up) and report characteristics (e.g., years considered, language, publication status) used as criteria for eligibility, giving rationale.                                                                                                      | Study characteristics described on p. 5                                          |
| Information sources       | 7 | Describe all information sources (e.g., databases with dates of coverage, contact with study authors to identify additional studies) in the search and date last searched.                                                                                                                                  | Information sources                                                              |

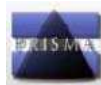

# PRISMA 2009 Checklist

1  
2  
3  
4  
5  
6  
7  
8  
9  
10  
11  
12  
13  
14  
15  
16  
17  
18  
19  
20  
21  
22  
23  
24  
25  
26  
27  
28  
29  
30  
31  
32  
33  
34  
35  
36  
37  
38  
39  
40  
41  
42  
43  
44  
45  
46  
47

|                                    |    |                                                                                                                                                                                                                        |                                            |
|------------------------------------|----|------------------------------------------------------------------------------------------------------------------------------------------------------------------------------------------------------------------------|--------------------------------------------|
|                                    |    |                                                                                                                                                                                                                        | described on p. 5.                         |
| Search                             | 8  | Present full electronic search strategy for at least one database, including any limits used, such that it could be repeated.                                                                                          | This is provided in Supplementary file 1   |
| Study selection                    | 9  | State the process for selecting studies (i.e., screening, eligibility, included in systematic review, and, if applicable, included in the meta-analysis).                                                              | Described on p. 6                          |
| Data collection process            | 10 | Describe method of data extraction from reports (e.g., piloted forms, independently, in duplicate) and any processes for obtaining and confirming data from investigators.                                             | Described on p. 7                          |
| Data items                         | 11 | List and define all variables for which data were sought (e.g., PICOS, funding sources) and any assumptions and simplifications made.                                                                                  | Described on p. 8 and Supplementary file 2 |
| Risk of bias in individual studies | 12 | Describe methods used for assessing risk of bias of individual studies (including specification of whether this was done at the study or outcome level), and how this information is to be used in any data synthesis. | N/A                                        |
| Summary measures                   | 13 | State the principal summary measures (e.g., risk ratio, difference in means).                                                                                                                                          | N/A                                        |
| Synthesis of results               | 14 | Describe the methods of handling data and combining results of studies, if done, including measures of consistency (e.g., $I^2$ ) for each meta-analysis.                                                              | N/A                                        |

Page 1 of 2

| Section/topic               | #  | Checklist item                                                                                                                               | Reported on page #                                                                                                        |
|-----------------------------|----|----------------------------------------------------------------------------------------------------------------------------------------------|---------------------------------------------------------------------------------------------------------------------------|
| Risk of bias across studies | 15 | Specify any assessment of risk of bias that may affect the cumulative evidence (e.g., publication bias, selective reporting within studies). | No formal risk of bias, but there is a lot of redundant publication. We have indicated potential unreliability of data on |

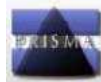

# PRISMA 2009 Checklist

|                               |    |                                                                                                                                                                                                          |                                                |
|-------------------------------|----|----------------------------------------------------------------------------------------------------------------------------------------------------------------------------------------------------------|------------------------------------------------|
|                               |    |                                                                                                                                                                                                          | p. 24.                                         |
| Additional analyses           | 16 | Describe methods of additional analyses (e.g., sensitivity or subgroup analyses, meta-regression), if done, indicating which were pre-specified.                                                         | N/A                                            |
| <b>RESULTS</b>                |    |                                                                                                                                                                                                          |                                                |
| Study selection               | 17 | Give numbers of studies screened, assessed for eligibility, and included in the review, with reasons for exclusions at each stage, ideally with a flow diagram.                                          | See p and Figure 1                             |
| Study characteristics         | 18 | For each study, present characteristics for which data were extracted (e.g., study size, PICOS, follow-up period) and provide the citations.                                                             | Data extraction items are listed in Appendix 2 |
| Risk of bias within studies   | 19 | Present data on risk of bias of each study and, if available, any outcome level assessment (see item 12).                                                                                                | N/A                                            |
| Results of individual studies | 20 | For all outcomes considered (benefits or harms), present, for each study: (a) simple summary data for each intervention group (b) effect estimates and confidence intervals, ideally with a forest plot. | N/A as no intervention groups                  |
| Synthesis of results          | 21 | Present results of each meta-analysis done, including confidence intervals and measures of consistency.                                                                                                  | N/A                                            |
| Risk of bias across studies   | 22 | Present results of any assessment of risk of bias across studies (see Item 15).                                                                                                                          | N/A                                            |
| Additional analysis           | 23 | Give results of additional analyses, if done (e.g., sensitivity or subgroup analyses, meta-regression [see Item 16]).                                                                                    | Descriptive analyses only                      |
| <b>DISCUSSION</b>             |    |                                                                                                                                                                                                          |                                                |
| Summary of evidence           | 24 | Summarize the main findings including the strength of evidence for each main outcome; consider their relevance to key groups (e.g., healthcare providers, users, and policy makers).                     | Strength of evidence not applicable            |
| Limitations                   | 25 | Discuss limitations at study and outcome level (e.g., risk of bias), and at review-level (e.g., incomplete retrieval of identified research, reporting bias).                                            | See p. 24.                                     |
| Conclusions                   | 26 | Provide a general interpretation of the results in the context of other evidence, and implications for future research.                                                                                  | See pp. 21-4                                   |
| <b>FUNDING</b>                |    |                                                                                                                                                                                                          |                                                |



# PRISMA 2009 Checklist

1  
2  
3  
4  
5  
6  
7  
8  
9  
10  
11  
12  
13  
14  
15  
16  
17  
18  
19  
20  
21  
22  
23  
24  
25  
26  
27  
28  
29  
30  
31  
32  
33  
34  
35  
36  
37  
38  
39  
40  
41  
42  
43  
44  
45  
46  
47

|         |    |                                                                                                                                            |                                       |
|---------|----|--------------------------------------------------------------------------------------------------------------------------------------------|---------------------------------------|
| Funding | 27 | Describe sources of funding for the systematic review and other support (e.g., supply of data); role of funders for the systematic review. | There was no funding for this review. |
|---------|----|--------------------------------------------------------------------------------------------------------------------------------------------|---------------------------------------|

From: Moher D, Liberati A, Tetzlaff J, Altman DG, The PRISMA Group (2009). Preferred Reporting Items for Systematic Reviews and Meta-Analyses: The PRISMA Statement. PLoS Med 6(7): e1000097. doi:10.1371/journal.pmed1000097

For more information, visit: [www.prisma-statement.org](http://www.prisma-statement.org).

Page 2 of 2

For peer review only

# BMJ Open

## Compliance with ethical standards in the reporting of donor sources and ethics review in peer-reviewed publications involving organ transplantation in China: A scoping review

|                                 |                                                                                                                                                                                                                                                                                                                                                                                                                                                                                                                                                      |
|---------------------------------|------------------------------------------------------------------------------------------------------------------------------------------------------------------------------------------------------------------------------------------------------------------------------------------------------------------------------------------------------------------------------------------------------------------------------------------------------------------------------------------------------------------------------------------------------|
| Journal:                        | <i>BMJ Open</i>                                                                                                                                                                                                                                                                                                                                                                                                                                                                                                                                      |
| Manuscript ID                   | bmjopen-2018-024473.R2                                                                                                                                                                                                                                                                                                                                                                                                                                                                                                                               |
| Article Type:                   | Research                                                                                                                                                                                                                                                                                                                                                                                                                                                                                                                                             |
| Date Submitted by the Author:   | 28-Sep-2018                                                                                                                                                                                                                                                                                                                                                                                                                                                                                                                                          |
| Complete List of Authors:       | Rogers, Wendy; Macquarie University, Clinical Medicine<br>Robertson, Matthew; Human Rights Law Foundation, Human Rights Law Foundation; Victims of Communism Memorial Foundation, China Studies<br>Ballantyne, Angela; University of Otago,<br>Blakely, Brette; Macquarie University, Australian Institute of Health Innovation<br>Catsanos, Ruby; No institutional affiliation<br>Clay-Williams, Robyn; Macquarie University, Australian Institute of Health Innovation<br>Fiatarone Singh, Maria; University of Sydney, Faculty of Health Sciences |
| <b>Primary Subject Heading</b>: | Ethics                                                                                                                                                                                                                                                                                                                                                                                                                                                                                                                                               |
| Secondary Subject Heading:      | Medical publishing and peer review                                                                                                                                                                                                                                                                                                                                                                                                                                                                                                                   |
| Keywords:                       | organ donation, China, publication ethics, scoping review, executed prisoners                                                                                                                                                                                                                                                                                                                                                                                                                                                                        |
|                                 |                                                                                                                                                                                                                                                                                                                                                                                                                                                                                                                                                      |

SCHOLARONE™  
Manuscripts

1  
2  
3 **Compliance with ethical standards in the reporting of donor sources and ethics review**  
4  
5 **in peer-reviewed publications involving organ transplantation in China: A scoping**  
6  
7 **review**  
8  
9

10  
11  
12 Wendy Rogers (corresponding author), Department of Clinical Medicine and Department of  
13  
14 Philosophy, Macquarie University, Sydney, Australia.

15  
16  
17 [wendy.rogers@mq.edu.au](mailto:wendy.rogers@mq.edu.au)

18  
19 Department of Philosophy, Macquarie University, NSW 2109, Australia

20  
21 +61 2 9850 8858  
22  
23

24  
25  
26 Matthew Robertson, Human Rights Law Foundation, New York. [mprob7@gmail.com](mailto:mprob7@gmail.com)  
27  
28

29  
30 Angela Ballantyne, Department of Primary Health Care & General Practice, University of  
31  
32 Otago, Wellington, New Zealand. [angela.ballantyne@otago.ac.nz](mailto:angela.ballantyne@otago.ac.nz)  
33  
34

35  
36  
37 Brette Blakely, Australian Institute of Health Innovation, Macquarie University, Sydney,  
38  
39 Australia. [brette.blakely@mq.edu.au](mailto:brette.blakely@mq.edu.au)  
40  
41

42  
43  
44 Ruby Catsanos, No institutional affiliation, Sydney, Australia.  
45

46  
47 [rbycatsanos@gmail.com](mailto:rbycatsanos@gmail.com)  
48  
49

50  
51 Robyn Clay-Williams, Australian Institute of Health Innovation, Macquarie University,  
52  
53 Sydney, Australia. [robyn.clay-williams@mq.edu.au](mailto:robyn.clay-williams@mq.edu.au)  
54  
55  
56  
57  
58  
59  
60

1  
2  
3 Maria Fiatarone Singh, Faculty of Health Sciences, University of Sydney, Australia.  
4

5 [maria.fiataronesingh@sydney.edu.au](mailto:maria.fiataronesingh@sydney.edu.au)  
6  
7  
8  
9  
10  
11

## 12 **Key words**

13  
14 Organ donation, China, Publication ethics, scoping review, executed

15  
16  
17 prisoners  
18  
19  
20

## 21 **Word count**

22 4336 excluding tables and references  
23  
24  
25  
26  
27  
28  
29  
30  
31  
32  
33  
34  
35  
36  
37  
38  
39  
40  
41  
42  
43  
44  
45  
46  
47  
48  
49  
50  
51  
52  
53  
54  
55  
56  
57  
58  
59  
60



## Abstract

**Objectives:** The objective of this study is to investigate whether papers reporting research on Chinese transplant recipients comply with international professional standards aimed at excluding publication of research that: (1) involves any biological material from executed prisoners; (2) lacks Institutional Review Board approval; and (3) lacks consent of donors.

**Design:** Scoping review based on Arksey and O'Mallee's methodological framework.

**Data sources:** Medline, Scopus and Embase were searched from January 2000 to April 2017.

**Eligibility criteria:** We included research papers published in peer-reviewed English language journals reporting on outcomes of research involving recipients of transplanted hearts, livers or lungs in mainland China.

**Data extraction and synthesis:** Data were extracted by individual authors working independently following training and benchmarking. Descriptive statistics were compiled using Excel.

**Results:** 445 included studies reported on outcomes of 85,477 transplants. 412 (92.5%) failed to report whether or not organs were sourced from executed prisoners; and 439 (99%) failed to report that organ sources gave consent for transplantation. In contrast, 324 (73%) reported approval from an IRB. Of the papers claiming that no prisoners' organs were involved in the transplants, 19 of them involved 2,688 transplants that took place prior to 2010, when there was no volunteer donor program in China.

**Discussion:** The transplant research community has failed to implement ethical standards banning publication of research using material from executed prisoners. As a result, a large body of unethical research now exists, raising issues of complicity and moral hazard to the extent that the transplant community uses and benefits from the results of this research. We call for retraction of this literature pending investigation of individual papers.

### Strengths and weaknesses of this study

- The study's main strengths lie in its originality and in the use of robust scoping review methods, giving confidence that the results are reliable.
- However, scoping review methods are less rigorous than systematic reviews and it is possible that some relevant papers were not included.
- Publications were excluded if they were in languages other than English, or published in Chinese journals, regardless of the language of publication.
- The data in the included studies were imprecise regarding organ sources. It is possible that a small number of liver transplants classified as deceased donor were from living donors.
- The total number of participants (and hence number of transplants) in the included studies is inflated by multiple publication of the same and overlapping research cohorts.

## Introduction

The transplantation of organs procured from executed prisoners is widely condemned by bodies including the World Health Organisation,[1] the World Medical Association,[2] The Transplantation Society,[3] Amnesty International and the Declaration of Istanbul.[4,5] This condemnation extends to undertaking research and presenting results that involve the use of organs obtained from executed prisoners.[4] In 2006, The Transplantation Society (TTS) explicitly stated that it would not accept conference papers based on research involving organs sourced from executed prisoners.[6,7] The 2006 policy statement by TTS was followed by calls for a boycott on accepting conference papers or publishing journal articles based on research involving organs from executed prisoners.[8–10] Some journals explicitly adopted this ban as policy (*Journal of Clinical Investigation*,[11] *American Journal of Transplantation* and the *Journal of Heart and Lung Transplantation*).[9]

Together, these statements by international bodies, professional societies, academics and journals constitute explicit ethical standards prohibiting the publication or presentation of research involving organs sourced from executed prisoners. These standards are primarily directed towards peer-reviewers, editors and publishers. However, these standards lack regulatory force; there are no sanctions for breaches, and to date there has been no audit investigating compliance.

This study is the first attempt to track the progress of the transplant community in meeting this ethical injunction to avoid publication of research based on organs sourced from executed prisoners.

## Background

The prohibition against the use of executed prisoners' organs is explicitly directed towards China, which is one of the few countries where the use of prisoners' organs has been

1  
2  
3 government-sanctioned. In 2001, a Chinese official dismissed as “sensational lies” reports of  
4 organ harvesting from executed prisoners, claiming that the major source of organs was  
5 voluntary donations.[12] This rhetoric changed in 2006 when Chinese officials first openly  
6 acknowledged that the majority of transplanted organs were sourced from executed  
7 prisoners.[13,14] In 2007, China claimed it would reduce reliance on executed prisoners,[15]  
8 but in a 2015 interview, Huang Jiefu, China’s most senior transplant official, stated that there  
9 had been just 120 cases of volunteer donors up to 2009.[16] In 2014 Huang committed China  
10 to using only organs from volunteer donors from 1 January 2015.[17] However, the use of  
11 prisoners’ organs remains technically legal today in China if ‘consent’ is obtained,[18] and in  
12 2017 Chinese officials admitted that it is not possible to verify that all organ harvesting from  
13 prisoners has ceased.[19]

14  
15 Use of organs from executed prisoners is widely condemned because the coercive situation of  
16 being on death row undermines the possibility of ethically valid consent, or consent may not  
17 be sought at all.[20] In addition, in China there have been extensive and credible reports of  
18 non-voluntary organ harvesting from prisoners of conscience, adding to ethical  
19 concern.[21,22]

20  
21 The transplant community recognises that boycott is an effective way to express  
22 condemnation of Chinese organ procurement practices, leading to formal TTS policy and  
23 recommendations for banning unethical research as described above. Publication in  
24 international, peer-reviewed journals is a marker of academic success and international  
25 acceptance. Imposing a ban sends a strong message of disapprobation to researchers whose  
26 projects involve transplants of organs sourced from executed prisoners.

27  
28 The current approach to this issue taken by TTS and some journals is incremental rather than  
29 absolutist.[10] An ‘absolutist’ approach would ban publication of all Chinese transplant data  
30 until there is compelling positive evidence that the use of executed prisoners’ organs has

1  
2  
3 ceased. This would require free and full on-site inspections of Chinese transplant hospitals,  
4 including unfettered access to hospital information systems. China has not agreed to such  
5 inspections and no international or professional body has assumed responsibility for pursuing  
6 this issue. Instead, the professions' preferred incremental approach requires assessment of  
7 Chinese studies for ethical acceptability prior to publication, with exclusion of any that  
8 include data from executed prisoners. The incremental policy therefore requires peer-  
9 reviewers and journal editors to ask consistently whether the research: (1) involved any  
10 biological material sourced from executed prisoners; (2) received Institutional Review Board  
11 (IRB) (Research Ethics Committee) approval; and (3) required consent of donors. For  
12 transparency purposes this information should be included in the final publication.

13  
14  
15  
16  
17  
18  
19  
20  
21  
22  
23  
24  
25  
26  
27  
28  
29  
30  
31  
32  
33  
34  
35  
36  
37  
38  
39  
40  
41  
42  
43  
44  
45  
46  
47  
48  
49  
50  
51  
52  
53  
54  
55  
56  
57  
58  
59  
60

Transparency contributes to a culture of accountability and ensures that readers are not unwittingly absorbing and using unethically obtained data. The burden of proof should rest with authors/researchers to supply evidence of consent to donation, and approval by an IRB, and attest that their study does not use material derived from executed prisoners.

In this study, we investigated the extent to which journals have complied with these ethical standards by: 1) publishing only research using organs from volunteer donors; 2) requiring a statement of IRB approval; and 3) providing a statement that consent was obtained from donors. As noted above, 'consent' obtained from executed prisoners does not meet international ethical standards.

## Methods

This research used scoping review methodology. Scoping reviews can be used to map an area of research, summarise existing evidence or identify gaps in the literature. Unlike systematic reviews, scoping reviews usually do not assess the quality of the included studies.[23] This

review followed the five steps articulated by Arksey and O'Mallee to ensure rigour, transparency and facilitate replication (see Table 1).[24]

Table 1: Arksey and O'Mallee's methodological framework for a scoping review

| Framework stage | Description                                      |
|-----------------|--------------------------------------------------|
| Stage 1         | Identifying the research question                |
| Stage 2         | Identifying relevant studies                     |
| Stage 3         | Study selection                                  |
| Stage 4         | Charting the data                                |
| Stage 5         | Collating, summarising and reporting the results |

The research question was identified and refined through discussion amongst the authors and expert colleagues. The final version was: "To what extent do papers reporting research on Chinese transplant recipients identify the sources of organs, whether sources were living or deceased, and compliance with ethical requirements for human research and organ donation as per international guidelines and professional standards?"

### *Search Strategy*

Relevant studies in English language journals were identified through searching online databases. The electronic search strategies were developed, tested and refined with the assistance of an expert librarian. The search aimed to identify full text papers published in English in peer-reviewed journals by authors based at Chinese institutions that reported on research involving recipients of solid organ transplants. The search strategies for Medline, Scopus and Embase are in Supplementary File 1. The inclusionary criteria were organ transplantation/transplant (title, abstract) and China (institution/affiliation). The exclusionary criteria were stem cells (title, abstract); mice (title, abstract); living donors (title, abstract); case reports/letters/editorials (document type). The searches were limited to English language

1  
2  
3 and humans, and the years were 2000-date of search. The start date of 2000 was selected as  
4 this is when numbers of transplantations and associated research papers rapidly increased in  
5  
6  
7  
8 China.

9  
10 Medline, Scopus and Embase were searched on 5 April 2017 by WR, BB and RCW. All  
11  
12 relevant searches were downloaded into an EndNote library by WR. Duplicates were  
13  
14 removed by EndNote filter. We did not identify further papers from other sources or search  
15  
16 the references of included papers as we aimed to capture papers that are readily available  
17  
18 through mainstream databases, and this was a scoping rather than systematic review. We  
19  
20 recognised that our search strategy might potentially miss some papers published in difficult  
21  
22 to find journals as well as those published in languages other than English, with a potential  
23  
24 reduction in sensitivity. However, we do not think that papers omitted as a result of this  
25  
26 strategy undermine the reliability of the findings. Rather, these omissions may make our  
27  
28 estimate of the magnitude of any ethical breaches of publication standards conservative,  
29  
30 based on the assumption that ethical compliance is likely to be higher in international journals  
31  
32 published in English compared to journals published in China whether in Chinese or English  
33  
34 language.

35  
36  
37  
38  
39  
40 The title and abstracts remaining after removal of duplicates were screened for obvious  
41  
42 exclusionary factors, with each author screening an equal number. All authors were trained in  
43  
44 the use of the exclusionary criteria by screening the same 100 abstracts and titles. At the end  
45  
46 of the pilot process, the exclusionary criteria were refined following discussion. The final  
47  
48 exclusionary criteria for title and abstract screening were:

- 49  
50  
51 ● transplants other than solid organs;
- 52  
53 ● transplants not occurring in mainland China;
- 54  
55 ● clinical case reports and/or incidental inclusion of data from Chinese transplant  
56  
57 recipients;
- 58  
59  
60

- meta-analyses and systematic reviews;
- animal research;
- English-language journals published in China.

Articles which could not be eliminated by title and abstract were reviewed as full text articles to determine eligibility. Prior to full text review, five of the authors (WR, MPR, RC, BB, RCW) undertook further training and benchmarking in use of the exclusionary criteria on full text papers. This involved all five screening the same 20 papers, followed by discussion. The exclusionary criteria were finalised after this process (see Table 2), and four authors (RC, WR, MPR, BB) assessed full text articles for eligibility.

Table 2: Exclusion criteria for full text review of papers

|                                                                                                                                                                        |
|------------------------------------------------------------------------------------------------------------------------------------------------------------------------|
| “Animal Research” – Exclude any non-human research                                                                                                                     |
| “Chinese Journal” – Exclude any papers published in (English language) journals published in China, on the assumption of low compliance with Western ethical standards |
| “Case Report” – Exclude papers reporting on clinical case reports                                                                                                      |
| “Incidental Inclusion” – Exclude papers where transplant recipients are incidentally included as research participants                                                 |
| “Kidneys” – Exclude any papers reporting data from kidney transplant recipients due to ambiguity of source (living or deceased)                                        |
| “Living Donors” – Exclude papers where all the transplanted organs were procured from living donors, including split livers from living donors                         |
| “Not China” – Exclude any papers where the transplants took place outside mainland China                                                                               |
| “Not Reviewed” – Exclude any non peer reviewed publications (including commentaries, letter to editors etc.)                                                           |



|                                                                                   |
|-----------------------------------------------------------------------------------|
| “Other Organs” – Exclude other tissue or organs i.e., not livers, hearts or lungs |
| “Other” – State reason                                                            |
| “Review Paper” – Exclude review papers (meta-analysis, systematic reviews etc.)   |

The reasons for exclusion were recorded, but where more than one reason was present, only the first reason noted by the data extractor was recorded. Papers reporting on recipients of kidney transplants were excluded at the full text review stage after a trial of 200 full text analyses. In this sample, 40% of kidney papers failed to report whether organ sources were living or deceased. As a key question in our research concerned procurement of organs from executed prisoners, we did not want to include a potentially large number of papers in which it was unclear whether or not organs were procured from living donors.

The same four authors who determined eligibility of full text papers also extracted data from these papers onto pre-tested forms (see Supplementary File 2 for details extracted). Any details that could not be extracted with certainty were discussed by the group of authors to reach a consensus. No data extraction outcomes were unable to be resolved using this method. Data from 10% of included papers were checked by a second author.

This process is summarised in a PRISMA diagram (Figure 1).

*(Insert Figure 1 around here)*

#### *Patient and Public Involvement*

There was no patient or public involvement in this scoping review of published literature.

## **Results**

The searches identified 6723 records, leaving 4168 after duplicates were removed. After screening of abstracts and titles, 2489 records were excluded. 1679 full text articles were

1  
2  
3 screened for eligibility. 1229 were excluded (see Table 3). 445 papers were included in the  
4  
5 final data set (see Supplementary File 3), and 5 papers were unavailable.[25–29]  
6  
7  
8  
9

10 Table 3: Reasons for exclusions of full text papers (n=1229)  
11

| Reason               | Number |
|----------------------|--------|
| Animal Research      | 12     |
| Chinese Journal      | 96     |
| Case Report          | 3      |
| Incidental Inclusion | 14     |
| Kidneys              | 637    |
| Living Donors        | 7      |
| Not China            | 380    |
| Not Reviewed         | 1      |
| Other Organs         | 2      |
| Other                | 49     |
| Review Paper         | 28     |

12  
13  
14  
15  
16  
17  
18  
19  
20  
21  
22  
23  
24  
25  
26  
27  
28  
29  
30  
31  
32  
33  
34  
35  
36 The main results are summarised in Table 4. See Supplementary File 4 for a full table of  
37  
38 results.  
39  
40  
41  
42  
43  
44  
45  
46  
47  
48  
49  
50  
51  
52  
53  
54  
55  
56  
57  
58  
59  
60

Table 4: Results summary table

| Variable                                                                                                             | Number (%)    |
|----------------------------------------------------------------------------------------------------------------------|---------------|
| Total number of included papers                                                                                      | 445 (100%)    |
| Total number of transplants reported                                                                                 | 85,477        |
| Median number of transplants per paper (range)                                                                       | 72 (1-20,524) |
| Number of papers that explicitly stated organs (hearts, livers, lungs) were from deceased sources                    | 173 (39%)     |
| Number of papers reporting research ethics approval                                                                  | 324 (73%)     |
| Number of papers with any information on the identity of the sources of organs                                       | 63 (14%)      |
| Number of papers with explicit statement that no organs from prisoners were used                                     | 33 (7%)       |
| Number of papers that reported consent for donation                                                                  | 6 (1%)        |
| Number of papers with any statement about the diagnosis of death in sources (after brain death, after cardiac death) | 64 (14%)      |

Overall, 324 (73%) of the 445 papers included a statement regarding approval from an institutional or regional ethics committee. Most of these statements were of a general type such as: “The study protocol was conducted in accordance with the standards of the Declaration of Helsinki and current ethical guidelines”[30]; “All protocols were approved by the ethics committee of the institution before the study began, and the protocols conformed to

1  
2  
3 the ethical guidelines of the 1975 Helsinki Declaration”[31] and “The present study was  
4 approved by the ethics committee of Qingdao University (Qingdao, China)”.[32] Few  
5  
6 contained an IRB reference number or the date approval was granted. The majority of these  
7  
8 statements reported that research participants (who were the transplant *recipients*) had given  
9  
10 their informed consent.  
11  
12

13  
14 The graph in Figure 2 shows ethics approvals by year. These increased substantially after  
15  
16 2006, which was the year that The Transplantation Society published its policy banning  
17  
18 conference papers based on data from executed prisoners.[7]  
19

20  
21 *(Insert Figure 2 around here)*  
22  
23

24  
25 Only 63 papers (14%; see Supplementary File 5) included any information about the source  
26  
27 of the organs (i.e., whether or not the organs came from executed prisoners or volunteers, or  
28  
29 if consent was given). This category of organ sources (donor identity) was interpreted  
30  
31 inclusively. For example, papers reporting that sources gave informed consent were included  
32  
33 here even if there was no explicit statement that the sources were not prisoners. Under  
34  
35 Chinese policy, prisoners are permitted to make allegedly voluntary donations, which is in  
36  
37 violation of TTS policy.[33] The presence or absence of statements identifying organ sources  
38  
39 by year is in Figure 3. Only one paper published prior to 2007 included any information  
40  
41 about identity of sources.[34]  
42  
43

44  
45 *(Insert Figure 3 around here)*  
46  
47

48  
49 Among the 63 papers that provided any information about the sources of organs, 33 (only  
50  
51 7.4% of all included studies) stated explicitly that no organs from executed prisoners were  
52  
53 used in the transplantations.[30,31,34–65] Five of these also stated explicitly that organs were  
54  
55 sourced from volunteers.[35,39,46,48,61] Three of the 33 reported that informed consent was  
56  
57 obtained from sources or their families, and these three papers also included a statement  
58  
59  
60

about ethics review.[30,47,61] That is, less than one per cent of included studies contain all three pieces of information mandated by TTS.

However, the claims that organs were not procured from prisoners cannot be true in many of these 33 papers. According to Chinese reports, there were only 120 voluntary donors in the whole of China up until to 2009[16], and donation numbers were low during the nascent volunteer donor program from 2010-2014 (see Table 5).[66]

Table 5: Numbers of volunteer organ donors in China 2000-2014

| Year       | Number of volunteer donations according to Chinese sources |
|------------|------------------------------------------------------------|
| Up to 2009 | 120 [16]                                                   |
| 2010       | 34 [66]                                                    |
| 2011       | 132 [66]                                                   |
| 2012       | 433 [66]                                                   |
| 2013       | 849 [66]                                                   |
| 2014       | 1702 [66]                                                  |

Yet 19 of the 33 papers claiming that organs were not procured from executed prisoners reported on 2,688 transplants that took place prior to 2010.[34,36–38,53,54,61,63,67–77] One of these did not date the transplants but was published in 2010 reporting on grafts that had been stable for at least 2 years, indicating that the transplants had taken place prior to 2010.[37] 8 of the 33 papers report on 1,212 transplants that occurred both before and after 2010 [30,31,35,39,43,52,59,62] and 6 of them report on 1,556 transplants that took place during the period 2010-2014 during the pilot volunteer scheme.[17,42,55–57,60,64]

Turning to the 30 papers without explicit statement about prisoners, in 14 of these, statements indicated that organs were procured from volunteers, without specifying whether or not prisoners were excluded as volunteers.[78–91] Three of the 14 stated that informed consent was provided by donors or their families.[79,83,85]

Six papers reported that sources gave informed consent for donation, but did not record whether or not these were volunteers or prisoners.[92–97]

There were 10 papers that contained information implying that donations were from voluntary, non-prisoner sources, without explicitly stating this, or that consent was provided.[98–107] The statements from these papers are in Table 6.

Table 6: Text from papers reported in “Other” category of donor ID information

|                                                                                                                                                                                     |
|-------------------------------------------------------------------------------------------------------------------------------------------------------------------------------------|
| All the donors were from traffic accidents or cerebral bleeding coma [98]                                                                                                           |
| No organ trafficking involved [99]                                                                                                                                                  |
| Organ donation was conducted legally, following local regulations [100]                                                                                                             |
| Five donors were brain dead due to car accident, their respiration was maintained by mechanical ventilation and hemodynamics was stabilized by minimum doses of catecholamine [101] |
| The deceased donor livers were obtained through both social and legal donation [102]                                                                                                |
| The donation procedure followed the DCD guidelines of China [103]                                                                                                                   |
| Severe injuries and traffic accidents were the main reasons for DCD [104]                                                                                                           |
| Normal control hearts came from autopsies or donors with no history of heart disease who died in accidents [105]                                                                    |

1  
2  
3  
4 All the DBCD grafts were procured under controlled condition. Detailed  
5 information of the DBCD donors was obtained from The Chinese Red Cross  
6 and the OPO records. [106]  
7  
8

9  
10 All donors were in hospital's ICU before death. (cause of death for each  
11 donor is supplied in a table) [107]  
12  
13

14  
15 These statements do not necessarily preclude inclusion of organs procured from executed  
16 prisoners. For example, two papers refer to legal donation,[100,102] which might include  
17 organs from executed prisoners. Two papers refer to donors dying from severe injuries or in  
18 accidents. While these are potentially legitimate causes of death for organ donors, it is  
19 possible that these could be extreme euphemisms for deaths caused by execution.[104,105]  
20  
21 Looking at all of the organ source ID statements by year of transplant, there are a total of 30  
22 papers that either stated explicitly that no organs from prisoners were used (18) or indicated  
23 that organs were sourced voluntary and/or with consent during the time period when executed  
24 prisoners were virtually the sole source (there were 120 volunteer donations across all of  
25 China in this period). These data are in Table 7, along with the same data for the whole set of  
26 included papers. Of the 445 papers, 192 (43%) report on research that took place when the  
27 only organs available for transplant were from executed prisoners, while another 148 (33%)  
28 spanned the start of the volunteer donor pilot so must include at least some data derived from  
29 executed prisoners.  
30  
31  
32  
33  
34  
35  
36  
37  
38  
39  
40  
41  
42  
43  
44  
45  
46  
47  
48  
49  
50  
51  
52  
53  
54  
55  
56  
57  
58  
59  
60

Table 7: Numbers of papers, including those with organ source identity statements by years and numbers of transplants

|                                                                                              | No date of transplants in papers | All transplants prior to 2010* | Transplants before and after 2010 when volunteer pilot started | All transplants took place during pilot 2010-2014 | Transplants occurred before and after 2014 | All transplants occurred post 2014 |
|----------------------------------------------------------------------------------------------|----------------------------------|--------------------------------|----------------------------------------------------------------|---------------------------------------------------|--------------------------------------------|------------------------------------|
| Total included papers                                                                        | 61                               | 192                            | 148                                                            | 38                                                | 6                                          | 0                                  |
| Total number of transplants                                                                  | 2,959                            | 28,442                         | 49,376                                                         | 3,937                                             | 763                                        | 0                                  |
| 33 papers claiming no executed prisoners (No. of transplants)                                |                                  | 19<br>(2,688)                  | 8<br>(1,212)                                                   | 6<br>(1,556)                                      | 0                                          | 0                                  |
| 14 papers claiming volunteers (No. of transplants)                                           | 1<br>(321)                       | 8<br>(2,269)                   | 4<br>(387)                                                     | 1<br>(12)                                         | 0                                          | 0                                  |
| 6 papers claiming donors gave consent (No. of transplants)                                   | 1<br>(40)                        | 3<br>(200)                     | 2<br>(1,197)                                                   | 0                                                 | 0                                          | 0                                  |
| 10 papers with statement about donors implying voluntariness or consent (No. of transplants) | 2<br>(11)                        | 0                              | 4<br>(619)                                                     | 4<br>(153)                                        | 0                                          | 0                                  |

\* In one paper[37] the dates of the transplants were not recorded, but the paper, published in 2010, reported on research subjects whose grafts had been stable for at least 2 years, indicating transplant prior to 2010.



The majority of the papers reporting on the identity of organ sources also reported some form of institutional ethics approval, but 7 papers did not.[37,38,44,79,94,96,107]

Turning to the journals that published the 445 papers, a full list of these is in Supplementary File 6.

Seventeen journals published 5 or more papers during the study period. In this subset of 17, the proportion with ethics statements ranged from 38-100%, while the proportion with identity statements regarding sources ranged from 0-40%. (see Table 8)

Table 8: List of journals publishing 5 or more papers, and numbers of those papers in which there were ethics and/or organ source identity statements.

| Journal                                                 | CiteScore* | Total papers in journal out of 445 (%) | Number of papers with ethics statement (%) | Number of papers with donor ID (%) |
|---------------------------------------------------------|------------|----------------------------------------|--------------------------------------------|------------------------------------|
| Transplantation Proceedings                             | 0.98       | 65 (15%)                               | 25 (38%)                                   | 12 (18%)                           |
| PLoS ONE                                                | 3.11       | 20 (4%)                                | 19 (95%)                                   | 5 (25%)                            |
| Clinical Transplantation                                | 1.67       | 16 (4%)                                | 9 (56%)                                    | 3 (19%)                            |
| Liver Transplantation                                   | 2.50       | 15 (3%)                                | 12 (80%)                                   | 3 (20%)                            |
| Hepato-Gastroenterology                                 | 0.98       | 14 (3%)                                | 11 (79%)                                   | 2 (14%)                            |
| Experimental and Clinical Transplantation               | 0.54       | 11 (2%)                                | 10 (91%)                                   | 1 (9%)                             |
| Clinics and Research in Hepatology and Gastroenterology | 1.61       | 8 (2%)                                 | 7 (88%)                                    | 1 (13%)                            |

|                                                             |      |        |          |         |
|-------------------------------------------------------------|------|--------|----------|---------|
| International Journal of Clinical and Experimental Medicine | 1·17 | 8 (2%) | 5 (63%)  | 1 (13%) |
| Annals of Transplantation                                   | 1·29 | 7 (2%) | 4 (57%)  | 0 (0%)  |
| International Journal of Clinical Practice                  | 1·91 | 6 (1%) | 5 (83%)  | 0 (0%)  |
| Journal of Cancer Research and Clinical Oncology            | 3·32 | 6 (1%) | 5 (83%)  | 1 (17%) |
| Transplantation                                             | 2·71 | 6 (1%) | 5 (83%)  | 1 (17%) |
| European Journal of Gastroenterology and Hepatology         | 1·88 | 5 (1%) | 5 (100%) | 1 (20%) |
| Experimental and Therapeutic Medicine                       | 1·42 | 5 (1%) | 5 (100%) | 1 (20%) |
| Medical Oncology                                            | 1·91 | 5 (1%) | 5 (100%) | 0 (0%)  |
| Medicine (United States)                                    | 1·63 | 5 (1%) | 5 (100%) | 1 (20%) |
| Surgery (United States)                                     | 2·77 | 5 (1%) | 5 (100%) | 2 (40%) |

\*Average citations received per document published in the journal (Source: SCOPUS)

Finally, in terms of journals with specific policies banning publication of research based on use of prisoners' organs, our study identifies one paper published in the *American Journal of Transplantation* [89] and five papers published in *Transplantation* (the official journal of TTS) that appear to be in breach of their own stated policies.[94,108–111] One of these has over 300 citations.[109]

## Discussion

1  
2  
3 This study shows that the majority of the published literature identified in this scoping review  
4 reporting research on transplants in China from 2000-April 2017 fails to comply with ethical  
5 standards regarding exclusion of research based on organs procured from prisoners. The body  
6 of literature contains a large number of papers that certainly, or almost certainly include data  
7 from executed prisoners given China's acknowledgement that during this period executed  
8 prisoners were the principal organ source. While TTS policy appears to have been partially  
9 successful in that the number of papers claiming IRB approvals rose steeply after that policy  
10 was published in 2006, the inclusion of this information has not addressed the major  
11 underlying concern about use of prisoners' organs. This is because the ethics review process  
12 focuses on the protection of research participants and their informed consent for participation  
13 in research. In transplant research, it is the recipients of transplants who are protected by IRB  
14 review, rather than the organ donors. Therefore, claims about compliance with the  
15 Declaration of Helsinki are largely irrelevant regarding the use of prisoners' organs in  
16 research. Few papers (14%) include any information about the identity of organ sources.  
17 Only half of these explicitly state that no organs were procured from executed prisoners, but  
18 many of these claims are incompatible with what is known about volunteer organ sources in  
19 China.

20  
21  
22 Our findings raise significant issues. First, there is the broad question of what to do about the  
23 large body of literature based on research using organs from prisoners. It can be argued that  
24 prior to 2006, the international transplant community was not aware that in China at the time,  
25 all transplants were procured from executed prisoners. However, post-2006 and the  
26 publication of TTS policy, professional claims of ignorance are hard to support. This lack of  
27 vigilance on the part of reviewers, editors and publishers is morally concerning, given the  
28 large numbers of papers (over 85%) accepted for publication with no information at all on the  
29  
30  
31  
32  
33  
34  
35  
36  
37  
38  
39  
40  
41  
42  
43  
44  
45  
46  
47  
48  
49  
50  
51  
52  
53  
54  
55  
56  
57  
58  
59  
60



1  
2  
3 prisoner sources and/or donated voluntarily or with consent, the claims are incompatible with  
4  
5 what is known about voluntary donations across China in the relevant time period. There is  
6  
7 less certainty regarding the falsity of claims in published papers reporting on transplants that  
8  
9 took place between 2010-2014 given the existence of a pilot voluntary donation scheme.

10  
11 Determining the likely veracity of these claims requires sustained investigation, including of  
12  
13 Chinese language sources. Such investigation is possible, and has formed the basis for a  
14  
15 retraction of a paper that falsely claimed more organs were procured from volunteers than  
16  
17 there were reported volunteers at the relevant hospital.[119–121] This is to date the only  
18  
19 retraction in the literature. At the very least however, reviewers, editors and journals should  
20  
21 be aware that prior to 2010 there were almost no voluntary donors, and that the alleged  
22  
23 numbers of volunteer donors during the 2010-2014 pilot scheme were low (see Table 5).

24  
25 Given this situation, claims about volunteer sources for transplantation during these periods  
26  
27 warrant scrutiny, with rejection of papers and author bans if adequate evidence of ethical  
28  
29 organ sourcing is not provided.

30  
31 Third, there is a pressing need for further reviews of the literature excluded in this study. In  
32  
33 particular, we need review of Chinese language sources and English language publications in  
34  
35 China where a further large body of unethical research may be published, as well as review of  
36  
37 papers published in languages other than English and Chinese. A future review of kidney  
38  
39 transplant papers is also required, to fully document the extent of published unethical  
40  
41 research.

42  
43 Finally, there is a question regarding future publication of Chinese transplant papers. In our  
44  
45 view, it is unacceptable to publish any papers that are highly likely to contain data derived  
46  
47 from use of prisoners' organs. This includes data from transplants up until the end of 2014,  
48  
49 given the difficulty of establishing organ provenance and the demonstrated lack of veracity in  
50  
51 the claims of at least some authors. However, even transplants post-2015 may involve  
52  
53  
54  
55  
56  
57  
58  
59  
60

1  
2  
3 prisoners' organs.[19] For this reason, we suggest an interim moratorium on publication of all  
4 relevant papers, pending an international summit to develop policy. A summit involving  
5 representatives from the International Committee of Medical Journal Editors, Committee on  
6 Publication Ethics, The Transplantation Society and members of other relevant national and  
7 international transplant societies, together with China human rights experts, ethicists and any  
8 other relevant stakeholders could and should develop policy on handling future research. One  
9 outcome of this process could be the development of a checklist tool for all transplant papers,  
10 itemising mandatory information about organ sources. Given our lack of capacity in this  
11 study to report on papers involving kidney transplants due to missing information about the  
12 status of organ sources, one requirement of a checklist should be an unambiguous statement  
13 regarding whether organ sources were living or deceased. An international and widely  
14 adopted process of this kind would provide a strong incentive for China to move more rapidly  
15 towards an organ donation system that is ethical, transparent and verifiable. This incentive is  
16 currently lacking given the widespread publication of unethical research.

### 37 **Limitations**

38 The strengths of the study lie in its originality and robust methods. These give confidence that  
39 the results are reliable and likely to be conservative (given reasonable assumptions as  
40 described in the Methods) rather than to overestimate the findings. However, there are  
41 potential limitations. First, scoping reviews are less comprehensive than systematic reviews,  
42 making it possible that relevant papers were not identified and included. Second, we had to  
43 change our approach to data collection during the study, as the quality of data in the papers  
44 was often imprecise. This affected the study in two ways. We were not able to report on  
45 research involving kidney transplants due to lack of information as to whether sources were  
46 living or deceased; and we were not able to report on whether organs were obtained after  
47  
48  
49  
50  
51  
52  
53  
54  
55  
56  
57  
58  
59  
60

1  
2  
3 death declared on cardiac or brain criteria as this information was inconsistently reported.  
4  
5 Third, unless stated otherwise in the papers reporting on liver transplants, we have assumed  
6  
7 the donors were deceased. It is possible that some of the transplants classified as deceased  
8  
9 donor were from living split liver transplants, however we think the number is likely to be  
10  
11 very low as deceased sourcing is the commonest type of transplant and numbers of living  
12  
13 liver donations in China are low, at 7.37% of total cumulative liver transplants as of end  
14  
15 2011, according to official data.[122] Fourth, we have reported on published literature, but  
16  
17 during the period when only organs from executed prisoners were available, the  
18  
19 pharmaceutical industry ran clinical trials on immunosuppressants for transplantation in  
20  
21 China (including after 2007 when TTS policy was promulgated).[123] Unpublished industry  
22  
23 trials have not been included in our study. Finally, we have reported the total number of  
24  
25 participants (and hence number of transplants) in the included studies, but this number is  
26  
27 likely to be inflated by multiple publication of the same and overlapping research cohorts.  
28  
29 However, as our aim was to report on whether or not published research met the ethical  
30  
31 reporting standards mandated by The Transplantation Society, we do not think this is a  
32  
33 critical issue.  
34  
35  
36  
37  
38  
39  
40  
41

## 42 **Conclusion**

43  
44 The transplant community has failed to implement ethical standards banning publication of  
45  
46 research using material from executed prisoners. As a result, a large body of unethical  
47  
48 published research now exists, raising questions of complicity to the extent that the transplant  
49  
50 community uses and benefits from the results of this research. Our study has identified the  
51  
52 extent of this problem as well as specific papers containing demonstrably false claims about  
53  
54 organ sourcing. There has been a significant lack of vigilance and failure to adhere to  
55  
56 accepted ethical standards by reviewers, editors and publishers. Researchers and clinicians  
57  
58  
59  
60

1  
2  
3 who use this body of research risk complicity by implicitly accepting Chinese methods of  
4 organ procurement. We call for immediate retraction of all papers reporting research based on  
5 use of organs from executed prisoners, and an international summit to develop future policy  
6 for handling Chinese transplant research.  
7  
8  
9  
10  
11  
12  
13  
14  
15  
16  
17  
18  
19  
20  
21  
22  
23  
24  
25  
26  
27  
28  
29  
30  
31  
32  
33  
34  
35  
36  
37  
38  
39  
40  
41  
42  
43  
44  
45  
46  
47  
48  
49  
50  
51  
52  
53  
54  
55  
56  
57  
58  
59  
60

For peer review only



## Statements and Declarations

### Author contributions

All authors (WAR, MPR, AB, BB, RC, RCW, MFS) contributed substantially to the conception and design of the work and to the analysis and interpretation of the data. All authors contributed to revisions and approved the final draft. All authors agree to be accountable for all aspects of the work in ensuring that any questions related to the accuracy or integrity of any part of the work are appropriately investigated and resolved.

Specific individual contributions in addition to the above:

WAR led the drafting of the paper and contributed to data extraction.

MPR contributed to literature searching and data extraction.

AB contributed to literature searching and drafting sections of the manuscript.

BB contributed to data extraction and preparation of figures and tables.

RC contributed to data extraction.

RCW contributed to resolving data extraction outcomes.

MFS contributed to the Introduction.

The lead author (Wendy Rogers, the manuscript's guarantor) affirms that the manuscript is an honest, accurate, and transparent account of the study being reported. No important aspects of the study have been omitted; and that any discrepancies from the study as planned (and, if relevant, registered) have been explained.

### Competing interests disclosures

Dr. Ballantyne is a member of the New Zealand Advocacy & Initiatives Committee (NZAIC) of the International Coalition to End Transplant Abuse in China.

Dr. Blakely has nothing to disclose.

Dr. Catsanos has nothing to disclose.

1  
2  
3 Dr. Clay-Williams is a member of the Australian Advocacy and Initiatives Committee of the  
4  
5 International Coalition to End Transplant Abuse in China.  
6

7  
8 Prof Fiatarone Singh is a member of the Ethics Committee of Doctors Against Forced Organ  
9  
10 Harvesting, and a member of the Australian Advocacy and Initiatives Committee of the  
11  
12 International Coalition to End Transplant Abuse in China.  
13

14  
15 Mr. Robertson reports that he is an occasional expert contributor to the International  
16  
17 Coalition to End Transplant Abuse in China.  
18

19  
20 Prof Rogers is a Director of the NGO “International Coalition to End Transplant Abuse in  
21  
22 China” and is chair of its International Advisory Committee.  
23  
24  
25

### 26 **Ethics approval**

27  
28 No ethics committee approval was required as this study did not involve any patient data.  
29  
30  
31  
32

### 33 **Clinical trial registration**

34  
35 This study is a scoping review therefore was not registered as a clinical trial.  
36  
37  
38  
39

### 40 **Funding**

41  
42 This research received no specific grant from any funding agency in the public, commercial  
43  
44 or not-for-profit sectors.  
45  
46  
47  
48

### 49 **Data sharing**

50  
51 The full list of 445 included studies is published in Supplementary File 3.  
52  
53  
54  
55  
56  
57  
58  
59  
60

1  
2  
3 **Figure legends**  
4

5  
6 Figure 1. PRISMA flow chart detailing search strategy  
7

8 Figure 2. Articles per year with and without ethics statements  
9

10 Figure 3. Articles per year with and without organ source ID  
11  
12  
13  
14  
15  
16  
17  
18  
19  
20  
21  
22  
23  
24  
25  
26  
27  
28  
29  
30  
31  
32  
33  
34  
35  
36  
37  
38  
39  
40  
41  
42  
43  
44  
45  
46  
47  
48  
49  
50  
51  
52  
53  
54  
55  
56  
57  
58  
59  
60

For peer review only

### List of Supplementary Files

Supplementary File 1. Search strategies

Supplementary File 2. Details extracted from included studies

Supplementary File 3. Full list of 445 studies, bibliographic details

Supplementary File 4. Results table

Supplementary File 5. Bibliographic details of 63 studies containing some information regarding identity of and/or consent by organ sources or donors

Supplementary File 6: Full list of journals publishing papers included in the study and number of papers per journal

## References

- 1 World Health Organization. WHO guiding principles on human cell, tissue and organ transplantation. *Transplantation* 2010;90:229–33.
- 2 WMA - The World Medical Association-WMA Statement on Organ and Tissue Donation. <https://www.wma.net/policies-post/wma-statement-on-organ-and-tissue-donation/> (accessed 7 Feb 2018).
- 3 Stock P. Policy and Ethics. The Transplantation Society. <https://www.tts.org/about-tts-5/governance/policy-a-ethics> (accessed 7 Feb 2018).
- 4 Amnesty International. Amnesty International Report 2011: The State of the World's Human Rights. Amnesty International Publications 2011.
- 5 The Declaration of Istanbul on Organ Trafficking and Transplant Tourism. The Declaration of Istanbul Custodian Group. <http://www.declarationofistanbul.org/> (accessed 7 Feb 2018).
- 6 Tibell A. The Transplantation Society's policy on interactions with China. *Transplantation* 2007;84:292–4.
- 7 The Transplantation Society. The Transplantation Society's principles for interacting with China. 2006. [https://www.tts.org/index.php?option=com\\_content&view=article&id=11&Itemid=223](https://www.tts.org/index.php?option=com_content&view=article&id=11&Itemid=223) (accessed 28 September 2018)
- 8 Caplan AL, Danovitch G, Shapiro M, et al. Time for a boycott of Chinese science and medicine pertaining to organ transplantation. *Lancet* 2011;378:1218.
- 9 Lavee J, West LJ. A call for a policy change regarding publications based on transplantation of organs from executed prisoners. *J Heart Lung Transplant* 2012;31:555–6.
- 10 Danovitch GM, Shapiro ME, Lavee J. The Use of Executed Prisoners as a Source of Organ Transplants in China Must Stop. *Am J Transplant* 2011;11:426–8.
- 11 Caplan AL, Rockman HA, Turka LA. Editorial position on publishing articles on human organ transplantation. *J Clin Invest* 2012;122:2.
- 12 Smith CS. Doctor Says He Took Transplant Organs From Executed Chinese Prisoners. *The New York Times*. 2001. <https://www.nytimes.com/2001/06/29/world/doctor-says-he-took-transplant-organs-from-executed-chinese-prisoners.html> (accessed 17 Feb 2018).
- 13 Huang J. Ethical and legislative perspectives on liver transplantation in the People's Republic of China. *Liver Transpl* 2007;13:193–6.
- 14 BBC News - China admits death row organ use. BBC. <http://news.bbc.co.uk/2/hi/8222732.stm> (accessed 7 Feb 2018).
- 15 Wang H. New era for organ donation and transplant in China. Interview by Fiona Fleck.

- 1  
2  
3 Bull World Health Organ 2012;90:802–3.  
4
- 5 16 Zhao H, Wu N. 专访黄洁夫|中国器官移植事业光明正大地登上世界舞台  
6 [Exclusive Interview with Huang Jiefu: The China Organ  
7 Transplant Field Justly and Honorably Steps Onto the World  
8 Stage]. China Healthcare. 2015.<https://perma.cc/X73M-HNRX>  
9 (accessed 23 Mar 2018).  
10  
11  
12
- 13 17 Huang J-F, Zheng S-S, Liu Y-F, et al. China organ donation and transplantation update:  
14 the Hangzhou Resolution. *Hepatobiliary Pancreat Dis Int* 2014;13:122–4.  
15
- 16 18 Paul NW, Caplan A, Shapiro ME, et al. Human rights violations in organ procurement  
17 practice in China. *BMC Med Ethics* 2017;18:11.  
18
- 19 19 Kirchgaessner S. China may still be using executed prisoners' organs, official admits.  
20 *The Guardian*. 2017.[http://www.theguardian.com/world/2017/feb/07/china-still-using-](http://www.theguardian.com/world/2017/feb/07/china-still-using-executed-prisoners-organs-transplants-vatican)  
21 [executed-prisoners-organs-transplants-vatican](http://www.theguardian.com/world/2017/feb/07/china-still-using-executed-prisoners-organs-transplants-vatican) (accessed 21 Mar 2018).  
22  
23
- 24 20 Caplan A. The use of prisoners as sources of organs—an ethically dubious practice. *Am J*  
25 *Bioeth* 2011;11:1–5.  
26
- 27 21 Matas D, Kilgour D. *Bloody Harvest: the killing of Falun Gong for their organs*.  
28 Woodstock, ON: Seraphim Editions 2009.  
29
- 30 22 United States. Congressional-Executive Commission on China. *Falun Gong in China:  
31 Review and Update: Hearing Before the Congressional-Executive Commission on  
32 China, One Hundred Twelfth Congress, Second Session, December 18, 2012*. U.S.  
33 Government Printing Office 2013.  
34  
35
- 36 23 Levac D, Colquhoun H, O'Brien KK. Scoping studies: advancing the methodology.  
37 *Implement Sci* 2010;5:69.  
38
- 39 24 Arksey H, O'Malley L. Scoping studies: towards a methodological framework. *Int J Soc*  
40 *Res Methodol* 2005;8:19–32.  
41  
42
- 43 25 Xie W, Ye Q, Wan Q. A comparison of risk factors for septic shock in renal transplant  
44 recipients with liver transplant recipients with bloodstream infections. *Exp Clin Cardiol*  
45 2014;20:3587–97.  
46
- 47 26 Ye Q, Ma Y, Wan Q, et al. The distribution and resistance of pathogens causing blood  
48 stream infections following liver transplantation: A clinical analysis of 69 patients.  
49 *Hepatogastroenterology* 2014;61:2311–4.  
50
- 51 27 Zhu L, Liao S, Wang N, et al. Dose regimens for Chinese adult liver transplant  
52 recipients according to the genetic polymorphisms of CYP2C9, CYP2C19, and CYP3A5  
53 in recipients and donors. *Int J Clin Pharmacol Ther* 2016;54:587–96.  
54  
55
- 56 28 Nie X, Wan Q, Ye Q, et al. Fungemias following liver or kidney transplantation: A  
57 clinical analysis of 17 patients. *J Pure Appl Microbiol* 2014;8:667–70.  
58
- 59 29 Tsai HI, Tsai YF, Yu HP. Arterial waveform monitoring during liver transplantation.  
60

- 1  
2  
3 Exp Clin Cardiol 2014;20:145–57.  
4  
5  
6 30 Yang X, Lu Q, Tang T, et al. Prediction of the prognosis after liver transplantation in  
7 severe hepatitis B-induced liver failure and clinical decision for liver transplantation. *J*  
8 *Surg Res* 2013;183:846–51.  
9  
10 31 Mu H-J, Xie P, Chen J-Y, et al. Association of TNF- $\alpha$ , TGF- $\beta$ 1, IL-10, IL-6, and IFN- $\gamma$   
11 gene polymorphism with acute rejection and infection in lung transplant recipients. *Clin*  
12 *Transplant* 2014;28:1016–24.  
13  
14 32 Hu W-Y, Wu L-Q, Su Z, et al. Expression of human leukocyte antigen-G and acute  
15 rejection in patients following liver transplantation. *Exp Ther Med* 2014;8:1291–5.  
16  
17 33 黄洁夫：内地已有38家医院停用死囚器官 [Huang Jiefu: 38 Hospitals in  
18 China Have Already Stopped Using Organs From Prisoners].  
19 *Beijing Times*.  
20 2014.<http://npc.people.com.cn/n/2014/0307/c376899-24566378.html>  
21 (accessed 23 Mar 2018).  
22  
23 34 Guo C-B, Li Y-C, Zhang M-M, et al. Early postoperative care of liver transplantation for  
24 infants with biliary atresia during pediatric intensive care unit stay. *Transplant Proc*  
25 2010;42:1750–4.  
26  
27 35 Lei J, Yan L. Outcome comparisons among the Hangzhou, Chengdu, and UCSF criteria  
28 for hepatocellular carcinoma liver transplantation after successful downstaging  
29 therapies. *J Gastrointest Surg* 2013;17:1116–22.  
30  
31 36 Chen YB, Li SD, Ju BL, et al. Suitable calcineurin inhibitor concentrations for liver  
32 transplant recipients in the Chinese population. *Transplant Proc* 2011;43:1751–3.  
33  
34 37 Chu Z, Zhang J, Zhao Y, et al. Influence of immunosuppressive drugs on the  
35 development of CD4<sup>+</sup>CD25<sup>high</sup> Foxp3<sup>+</sup> T cells in liver transplant recipients.  
36 *Transplant Proc* 2010;42:2599–601.  
37  
38 38 Gu L, Yu YC. Clinical outcome of dental implants placed in liver transplant recipients  
39 after 3 years: A case series. *Transplant Proc* 2011;43:2678–82.  
40  
41 39 Lei JY, Wang WT, Yan LN. Hangzhou criteria for liver transplantation in hepatocellular  
42 carcinoma: A single-center experience. *Eur J Gastroenterol Hepatol* 2014;26:200–4.  
43  
44 40 Li J, Liu B, Yan LN, et al. Reversal of graft steatosis after liver transplantation:  
45 prospective study. *Transplant Proc* 2009;41:3560–3.  
46  
47 41 Ling Q, Xie H, Lu D, et al. Association between donor and recipient TCF7L2 gene  
48 polymorphisms and the risk of new-onset diabetes mellitus after liver transplantation in  
49 a Han Chinese population. *J Hepatol* 2013;58:271–7.  
50  
51 42 Ling Q, Xu X, Wang K, et al. Donor PPAR $\alpha$  gene polymorphisms influence the  
52 susceptibility to glucose and lipid disorders in liver transplant recipients. *Medicine*  
53 2015;94:e1421.  
54  
55  
56  
57  
58  
59  
60

- 1  
2  
3 43 Lu D, Xu X, Wang J, et al. The influence of a contemporaneous portal and hepatic artery  
4 revascularization protocol on biliary complications after liver transplantation. *Surgery*  
5 2014;155:190–5.  
6  
7  
8 44 Pan C, Shi Y, Zhang JJ, et al. Single-center experience of 253 portal vein thrombosis  
9 patients undergoing liver transplantation in China. *Transplant Proc* 2009;41:3761–5.  
10  
11 45 Wang SY, Tang HM, Chen GQ, et al. Effect of ursodeoxycholic acid administration  
12 after liver transplantation on serum liver tests and biliary complications: A randomized  
13 clinical trial. *Digestion* 2012;86:208–17.  
14  
15 46 Wang Y, Liu Y, Han R, et al. Monitoring of CD95 and CD38 expression in peripheral  
16 blood T lymphocytes during active human cytomegalovirus infection after orthotopic  
17 liver transplantation. *J Gastroenterol Hepatol* 2010;25:138–42.  
18  
19 47 Xiao L, Fu ZR, Ding GS, et al. Prediction of survival after liver transplantation for  
20 chronic severe hepatitis b based on preoperative prognostic scores: A single center's  
21 experience in China. *World J Surg* 2009;33:2420–6.  
22  
23 48 Xu J, Shen ZY, Chen XG, et al. A randomized controlled trial of Licartin for preventing  
24 hepatoma recurrence after liver transplantation. *Hepatology* 2007;45:269–76.  
25  
26 49 Xu X, Guo HJ, Xie HY, et al. ZIP4, a novel determinant of tumor invasion in  
27 hepatocellular carcinoma, contributes to tumor recurrence after liver transplantation. *Int*  
28 *J Biol Sci* 2014;10:245–56.  
29  
30 50 Liu X, Ling Q, Wei Q, et al. Artificial liver support system combined with liver  
31 transplantation in the treatment of patients with acute-on-chronic liver failure. *PLoS One*  
32 2013;8 (3).  
33  
34 51 Xu X, Tu Z, Wang B, et al. A novel model for evaluating the risk of hepatitis B  
35 recurrence after liver transplantation. *Liver Int* 2011;31:1477–84.  
36  
37 52 Xue F, Higgs BW, Huang J, et al. HERC5 is a prognostic biomarker for post-liver  
38 transplant recurrent human hepatocellular carcinoma. *J Transl Med* 2015;13.  
39 doi:10.1186/s12967-015-0743-2  
40  
41 53 Zhu M, Li Y, Xia Q, et al. Strong impact of acute kidney injury on survival after liver  
42 transplantation. *Transplant Proc* 2010;42:3634–8.  
43  
44 54 Chen J, Wang Y, Shen Z, et al. Early diagnostic value of plasma PCT and BG assay for  
45 CRBSI after OLT. *Transplant Proc* 2011;43:1777–9.  
46  
47 55 Fan X, Chen Z, Nasralla D, et al. The organ preservation and enhancement of donation  
48 success ratio effect of extracorporeal membrane oxygenation in circulatory unstable  
49 brain death donor. *Clin Transplant* 2016;30:1306–13.  
50  
51 56 Ling Q, Xie H, Li J, et al. Donor graft MicroRNAs: a newly identified player in the  
52 development of new-onset diabetes after liver transplantation. *Am J Transplant*  
53 2017;17:255–64.  
54  
55 57 Liu C, Tsai HL, Chin T, et al. Experience of surgical treatment for hepatoblastoma.  
56  
57  
58  
59  
60



- 1  
2  
3 Formosan Journal of Surgery 2016;49:56–62.  
4  
5  
6 58 Wang Y, Shen Z, Zhu Z, et al. Clinical values of AFP, GPC3 mRNA in peripheral blood  
7 for prediction of hepatocellular carcinoma recurrence following OLT. *Hepat Mon*  
8 2011;11:195–9.  
9  
10 59 Xu X, Ling Q, Wang J, et al. Donor miR-196a-2 polymorphism is associated with  
11 hepatocellular carcinoma recurrence after liver transplantation in a Han Chinese  
12 population. *International Journal of Cancer* 2016;138:620–9.  
13  
14 60 Yu Z, Sun Z, Yu S, et al. Safety limitations of fatty liver transplantation can be extended  
15 to 40%: Experience of a single centre in China. *Liver Int* Published Online First: 2016.  
16  
17 61 Zhang M, Yin F, Chen B, et al. Pretransplant prediction of posttransplant survival for  
18 liver recipients with benign end-stage liver diseases: A nonlinear model. *PLoS One*  
19 2012;7 (3).  
20  
21 62 Zhong L, Li H, Li Z, et al. C7 genotype of the donor may predict early bacterial  
22 infection after liver transplantation. *Sci Rep* 2016;6:24121.  
23  
24 63 Jiang L, Lei JY, Wang WT, et al. Immediate radical therapy or conservative treatments  
25 when meeting the Milan criteria for advanced HCC patients after successful TACE. *J*  
26 *Gastrointest Surg* 2014;18:1125–30.  
27  
28 64 Yu S, Yu J, Zhang W, et al. Safe use of liver grafts from hepatitis B surface antigen  
29 positive donors in liver transplantation. *J Hepatol* 2014;61:809–15.  
30  
31 65 Lee WC, Lee CS, Wang YC, et al. Validation of the model for end-stage liver disease  
32 score criteria in urgent liver transplantation for acute flare up of Hepatitis B. *Medicine*  
33 2016;95 (22).  
34  
35 66 中国模式+广州贡献'获国际器官捐献与移植学界点赞 ['China model +  
36 **Guangzhou donations' are praised by international organ**  
37 **donation and transplantation community]. China Organ**  
38 **Transplantation Development Foundation.**  
39 **2017.**[http://news.dayoo.com/guangzhou/201712/16/139995\\_51994682.](http://news.dayoo.com/guangzhou/201712/16/139995_51994682.htm)  
40 **htm (accessed 30 Mar 2018).**  
41  
42  
43  
44  
45  
46 67 Li MR, Chen GH, Cai CJ, et al. High hepatitis B virus DNA level in serum before liver  
47 transplantation increases the risk of hepatocellular carcinoma recurrence. *Digestion*  
48 2011;84:134–41.  
49  
50 68 Ling Q, Xu X, Li J, et al. A new serum cystatin C-based equation for assessing  
51 glomerular filtration rate in liver transplantation. *Clin Chem Lab Med* 2008;46:405–10.  
52  
53 69 Pan C, Wang C, Pan W, et al. Usefulness of real-time three-dimensional  
54 echocardiography to quantify global left ventricular function and mechanical  
55 dyssynchrony after heart transplantation. *Acta Cardiol* 2011;66:365–70.  
56  
57 70 Wang W, Ye Y, Wang T, et al. Prognostic prediction of male recipients selected for  
58 liver transplantation: With special attention to neutrophil to lymphocyte ratio. *Hepatol*  
59  
60

- Res 2016;46:899–907.
- 71 Wang Y, Liu Y, Han R, et al. Temporal evolution of soluble Fas and Fas ligand in patients with orthotopic liver transplantation. *Cytokine* 2008;41:240–3.
- 72 Xiao M, Xu X, Zhu H, et al. Efficacy and safety of basiliximab in liver transplantation for patients with hepatitis B virus-related diseases: A single centre study. *Int J Clin Pract* 2015;69:35–42.
- 73 Xu L, Li X, Xu M, et al. Perioperative use of ECMO during double lung transplantation. *ASAIO Journal* 2009;55:255–8.
- 74 Xu X, Ke QH, Shao ZX, et al. The value of serum  $\alpha$ -fetoprotein in predicting tumor recurrence after liver transplantation for hepatocellular carcinoma. *Dig Dis Sci* 2009;54:385–8.
- 75 Xu X, Qu K, Wan Y, et al. Tumor existence and tumor size as prognostic factors in hepatitis B virus-related cirrhosis patients who underwent liver transplantation. *Transplant Proc* 2014;46:1389–92.
- 76 Xu ZD, Xu HT, Li WW, et al. Influence of preoperative diastolic dysfunction on hemodynamics and outcomes of patients undergoing orthotopic liver transplantation. *Int J Clin Exp Med* 2013;6:351–7.
- 77 Wang Y, Zhang M, Liu ZW, et al. The ratio of circulating regulatory T cells (Tregs)/Th17 cells is associated with acute allograft rejection in liver transplantation. *PLoS ONE* 2014;9:e112135.
- 78 Chen ZY, Yan LN, Zeng Y, et al. Preliminary experience with indications for liver transplantation for hepatolithiasis. *Transplant Proc* 2008;40:3517–22.
- 79 Fan J, Yang GS, Fu ZR, et al. Liver transplantation outcomes in 1,078 hepatocellular carcinoma patients: A multi-center experience in Shanghai, China. *J Cancer Res Clin Oncol* 2009;135:1403–12.
- 80 Gao Y, Zhang M, Li J, et al. Circulating FoxP3+ regulatory T and interleukin17-producing Th17 cells actively influence HBV clearance in De Novo Hepatitis B virus infected patients after orthotopic liver transplantation. *PLoS One* 2015;10. doi:10.1371/journal.pone.0137881
- 81 Hu XX, Yan LN. Retrospective analysis of prognostic factors after liver transplantation for intrahepatic cholangiocarcinoma in China: A single-center experience. *Hepatogastroenterology* 2011;58:1255–9.
- 82 Li F, Yang M, Li B, et al. Initial clinical results of orthotopic liver transplantation for hepatic alveolar echinococcosis. *Liver Transpl* 2007;13:924–6.
- 83 Li H, He JW, Fu BS, et al. Immunosuppressant-related hip pain after orthotopic liver transplant. *Exp Clin Transplant* 2013;11:32–8.
- 84 Zhang D, Jiao Z, Han J, et al. Clinicopathological features of hepatitis B virus recurrence after liver transplantation: Eleven-year experience. *Int J Clin Exp Pathol*

- 2014;7:4057–66.
- 85 Zhang M, Yin F, Chen B, et al. Mortality risk after liver transplantation in hepatocellular carcinoma recipients: A nonlinear predictive model. *Surgery* 2012;151:889–97.
- 86 Zhang Y, Yan L, Wen T, et al. Prophylaxis against hepatitis B virus recurrence after liver transplantation for hepatitis B virus-related end-stage liver diseases with severe hypersplenism and splenomegaly: Role of splenectomy. *J Surg Res* 2012;178:478–86.
- 87 Lei JY, Yan LN, Wang WT, et al. Health-related quality of life and psychological distress in patients with early-stage hepatocellular carcinoma after hepatic resection or transplantation. *Transplant Proc* 2016;48:2107–11.
- 88 Lin B, Geng L, Zheng Z, et al. The predictive value of blood neutrophil-lymphocyte ratio in patients with end-stage liver cirrhosis following ABO-incompatible liver transplantation. *J Res Med Sci* 2016;21:20–5.
- 89 Jiang L, Yan L, Li B, et al. Prophylaxis against hepatitis B recurrence posttransplantation using lamivudine and individualized low-dose hepatitis B immunoglobulin. *Am J Transplant* 2010;10:1861–9.
- 90 Chen Z, Gong R, Luo Y, et al. Surgical procedures for hepatolithiasis. *Hepatogastroenterology* 2010;57:134–7.
- 91 Lin XH, Teng S, Wang L, et al. Fatigue and its associated factors in liver transplant recipients in Beijing: A cross-sectional study. *BMJ Open* 2017;7 (2).
- 92 Ran JH, Zhang SN, Liu J, et al. In-hospital and follow-up outcomes of patients undergoing orthotopic liver transplantation after hepatic artery reconstruction with an iliac interposition graft. *Int J Clin Exp Med* 2016;9:3939–45.
- 93 Xu X, Ling Q, Gao F, et al. Hepatoprotective effects of marine and kuhuang in liver transplant recipients. *Am J Chin Med* 2009;37:27–34.
- 94 Xu X, Ling Q, Zhang M, et al. Outcome of patients with hepatorenal syndrome type 1 after liver transplantation: Hangzhou experience. *Transplantation* 2009;87:1514–9.
- 95 Zhu XS, Wang SS, Cheng Q, et al. Using ultrasonography to monitor liver blood flow for liver transplant from donors supported on extracorporeal membrane oxygenation. *Liver Transpl* 2016;22:188–91.
- 96 Yuefeng M, Weili F, Wenxiang T, et al. Long-term outcome of patients with lamivudine after early cessation of hepatitis B immunoglobulin for prevention of recurrent hepatitis B following liver transplantation. *Clin Transplant* 2011;25:517–22.
- 97 Liu Y, Liu YY, Li CP, et al. Comprehensive comparison of three different immunosuppressive regimens for liver transplant patients with hepatocellular carcinoma: Steroid-free immunosuppression, induction immunosuppression and standard immunosuppression. *PLoS One* 2015;10 (3).
- 98 Chen Y, Zhang H, Xiao X, et al. Peripheral blood transcriptome sequencing reveals rejection-relevant genes in long-term heart transplantation. *Int J Cardiol* 2013;168:2726–

- 1  
2  
3 33.  
4  
5  
6 99 Gao Y, Ren H, Meng F, et al. Pathological roles of interleukin-22 in the development of  
7 recurrent hepatitis C after liver transplantation. *PLoS One* 2016;11.  
8 doi:10.1371/journal.pone.0154419  
9  
10 100 Gao YJ, Zhang M, Jin B, et al. A clinical-pathological analysis of hepatitis B virus  
11 recurrence after liver transplantation in Chinese patients. *J Gastroenterol Hepatol*  
12 2014;29:554–60.  
13  
14 101 Li H, Li J, Wang Y, et al. Proteomic analysis of effluents from perfused human heart for  
15 transplantation: Identification of potential biomarkers for ischemic heart damage.  
16 *Proteome Sci* 2012;10. doi:10.1186/1477-5956-10-21.  
17  
18 102 Li WX, Li Z, Gao PJ, et al. Histological differentiation predicts post-liver  
19 transplantation survival time. *Clin Res Hepatol Gastroenterol* 2014;38:201–8.  
20  
21 103 Sun XY, Dong JH, Qin K, et al. Single center study on transplantation of livers donated  
22 after cardiac death: A report of 6 cases. *Exp Ther Med* 2016;11:988–92.  
23  
24 104 Zhu XS, Gao YH, Wang SS, et al. Contrast-enhanced ultrasound diagnosis of splenic  
25 artery steal syndrome after orthotopic liver transplantation. *Liver Transpl* 2012;18:966–  
26 71.  
27  
28 105 Liu S, Bai Y, Huang J, et al. Do mitochondria contribute to left ventricular non-  
29 compaction cardiomyopathy? New findings from myocardium of patients with left  
30 ventricular non-compaction cardiomyopathy. *Mol Genet Metab* 2013;109:100–6.  
31  
32 106 Liu X, Wang B, Zhang X, et al. Liver Transplantation using donation after brain and  
33 cardiac death: a single-center experience in China. *Transplant Proc* 2016;48:1879–86.  
34  
35 107 Yuan X, Chen C, Zhou J, et al. Organ donation and transplantation from donors with  
36 systemic infection: a single-center experience. *Transplant Proc* 2016;48:2454–7.  
37  
38 108 Liang TB, Li DL, Liang L, et al. Intraoperative blood salvage during liver  
39 transplantation in patients with hepatocellular carcinoma: Efficiency of leukocyte  
40 depletion filters in the removal of tumor cells. *Transplantation* 2008;85:863–9.  
41  
42 109 Zheng S-S, Xu X, Wu J, et al. Liver transplantation for hepatocellular carcinoma:  
43 Hangzhou experiences. *Transplantation* 2008;85:1726–32.  
44  
45 110 Xie SB, Zhu JY, Ying Z, et al. Prevention and risk factors of the HBV recurrence after  
46 orthotopic liver transplantation: 160 cases follow-up study. *Transplantation*  
47 2010;90:786–90.  
48  
49 111 Xue F, Zhang J, Han L, et al. Immune cell functional assay in monitoring of adult liver  
50 transplantation recipients with infection. *Transplantation* 2010;89:620–6.  
51  
52 112 Cohen GA. Casting the first stone: who can, and who can't, condemn the terrorists?  
53 *Royal Institute of Philosophy Supplements* 2006;58:113–36.  
54  
55 113 Hickey D, Li SS, Morrison C, et al. Unit 731 and moral repair. *J Med Ethics*  
56  
57  
58  
59  
60

- 1  
2  
3 2017;43:270–6.  
4  
5  
6 114 Thomas DR, Pastrana S, Hutchings A, et al. Ethical issues in research using datasets of  
7 illicit origin. In: Proceedings of the 2017 Internet Measurement Conference. ACM 2017.  
8 445–62.  
9  
10 115 Green RM. Benefiting from ‘evil’: an incipient moral problem in human stem cell  
11 research. *Bioethics* 2002;16:544–56.  
12  
13 116 Is it Ethical to Use Data from Nazi Medical Experiments? ABC News.  
14 2015.<http://www.abc.net.au/religion/articles/2015/06/11/4253136.htm> (accessed 30 Mar  
15 2018).  
16  
17 117 Bärnighausen T. Barbaric Research, Japanese Human Experiments in Occupied China :  
18 Relevance, Alternatives, Ethics. In: Eckart WU, ed. *Man, Medicine, and the State: The*  
19 *Human Body As an Object of Government Sponsored Medical Research in the 20th*  
20 *Century*. Steiner 2006.  
21  
22  
23 118 Gutmann E. *The slaughter: mass killings, organ harvesting, and China’s secret solution*  
24 *to its dissident problem*. Prometheus Books Amherst 2014.  
25  
26 119 Retraction: ‘Safety limitations of fatty liver transplantation can be extended to 40%:  
27 Experience of a single centre in China’, by Yu Z., Yu S., Zhang L., Feng X., Zhang M.,  
28 et al. *Liver Int* 2017;37:767.  
29  
30  
31 120 Rogers WA, Fiatarone Singh MA, Lavee J. Papers based on data concerning organs  
32 from executed prisoners should not be published. *Liver Int* 2017;37:769.  
33  
34 121 Rogers WA, Fiatarone Singh MA, Lavee J. Papers based on data concerning organs  
35 from executed prisoners should not be published: Response to Zheng and Yan. *Liver Int*  
36 2017;37:771–2.  
37  
38  
39 122 Jiang WS, Zhou ZY et. al. *China Liver Transplant Registry Annual Report 2011*. China  
40 *Liver Transplant Registry* 2011.  
41  
42 123 Schwarz A. Responsibilities of international pharmaceutical companies in the abusive  
43 Chinese organ transplant system. In: Matas D, Trey T, eds. *State Organs: Transplant*  
44 *Abuse in China*. Woodstock, Ontario: : Seraphim Publishers 2012. 119–35.  
45  
46  
47  
48  
49  
50  
51  
52  
53  
54  
55  
56  
57  
58  
59  
60

**PRISMA 2009 Flow Diagram**

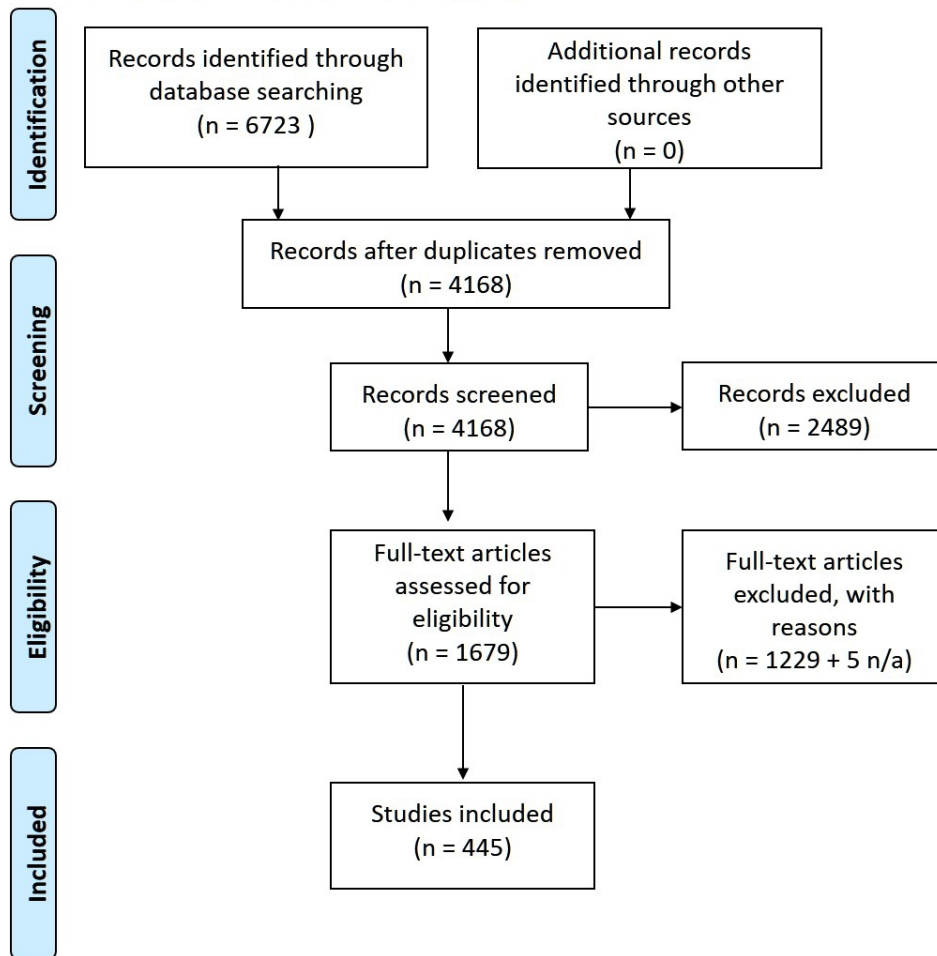

Figure 1: PRISMA flow chart detailing search strategy

180x183mm (150 x 150 DPI)

1  
2  
3  
4  
5  
6  
7  
8  
9  
10  
11  
12  
13  
14  
15  
16  
17  
18  
19  
20  
21  
22  
23  
24  
25  
26  
27  
28  
29  
30  
31  
32  
33  
34  
35  
36  
37  
38  
39  
40  
41  
42  
43  
44  
45  
46  
47  
48  
49  
50  
51  
52  
53  
54  
55  
56  
57  
58  
59  
60

### Articles per year with and without ethics statements



Articles per year with and without ethics statements

175x105mm (300 x 300 DPI)

Articles per year with and without organ source ID information



Articles per year with and without organ source ID information

194x117mm (300 x 300 DPI)



### Supplementary File1: Search strategies

All searches run on 5 April 2017

| <b>Medline®</b>                                                                                                                                                                                                                                                                                                                                                                                                                     |                                                                  | <b>Results<br/>:<br/>1702</b> |
|-------------------------------------------------------------------------------------------------------------------------------------------------------------------------------------------------------------------------------------------------------------------------------------------------------------------------------------------------------------------------------------------------------------------------------------|------------------------------------------------------------------|-------------------------------|
| 1                                                                                                                                                                                                                                                                                                                                                                                                                                   | exp Organ Transplantation/                                       |                               |
| 2                                                                                                                                                                                                                                                                                                                                                                                                                                   | transplant*.ti,ab.                                               |                               |
| 3                                                                                                                                                                                                                                                                                                                                                                                                                                   | 1 and 2                                                          |                               |
| 4                                                                                                                                                                                                                                                                                                                                                                                                                                   | China.in.                                                        |                               |
| 5                                                                                                                                                                                                                                                                                                                                                                                                                                   | 3 and 4                                                          |                               |
| 6                                                                                                                                                                                                                                                                                                                                                                                                                                   | stem cells.ti,ab.                                                |                               |
| 7                                                                                                                                                                                                                                                                                                                                                                                                                                   | mice.ti,ab.                                                      |                               |
| 8                                                                                                                                                                                                                                                                                                                                                                                                                                   | Living Donors/                                                   |                               |
| 9                                                                                                                                                                                                                                                                                                                                                                                                                                   | living donor.ti,ab.                                              |                               |
| 10                                                                                                                                                                                                                                                                                                                                                                                                                                  | Case Reports/                                                    |                               |
| 11                                                                                                                                                                                                                                                                                                                                                                                                                                  | or/6-10                                                          |                               |
| 12                                                                                                                                                                                                                                                                                                                                                                                                                                  | 5 not 11                                                         |                               |
| 13                                                                                                                                                                                                                                                                                                                                                                                                                                  | limit 12 to (English language and humans and yr="2000 -Current") |                               |
| <b>Timespan: 2000-2017 (5 April)</b>                                                                                                                                                                                                                                                                                                                                                                                                |                                                                  |                               |
| <b>SCOPUS</b>                                                                                                                                                                                                                                                                                                                                                                                                                       |                                                                  | <b>Results<br/>:<br/>2050</b> |
| (( TITLE ( transplant* ) AND AFFILCOUNTRY ( china ) AND NOT TITLE-ABS-KEY ( mice OR "stem cell" OR "living donor" OR "case report" )) AND PUBYEAR > 1999 ) AND ( EXCLUDE ( DOCTYPE , "cp " ) OR EXCLUDE ( DOCTYPE , "le " ) OR EXCLUDE ( DOCTYPE , "ed " )) AND ( LIMIT-TO ( LANGUAGE , "English " ) ) AND ( LIMIT-TO ( EXACTKEYWORD , "Human " ) OR LIMIT-TO ( EXACTKEYWORD , "Male " ) OR LIMIT-TO ( EXACTKEYWORD , "Female " ) ) |                                                                  |                               |
| <b>Embase</b>                                                                                                                                                                                                                                                                                                                                                                                                                       |                                                                  | <b>Results<br/>:<br/>2971</b> |
| 1                                                                                                                                                                                                                                                                                                                                                                                                                                   | exp organ transplantation/                                       |                               |
| 2                                                                                                                                                                                                                                                                                                                                                                                                                                   | china.in.                                                        |                               |
| 3                                                                                                                                                                                                                                                                                                                                                                                                                                   | 1 and 2                                                          |                               |
| 4                                                                                                                                                                                                                                                                                                                                                                                                                                   | stem cells.ti,ab.                                                |                               |
| 5                                                                                                                                                                                                                                                                                                                                                                                                                                   | mice.ti,ab.                                                      |                               |
| 6                                                                                                                                                                                                                                                                                                                                                                                                                                   | practice guideline/                                              |                               |
| 7                                                                                                                                                                                                                                                                                                                                                                                                                                   | *"living donor"/                                                 |                               |
| 8                                                                                                                                                                                                                                                                                                                                                                                                                                   | living donor.ti,ab.                                              |                               |
| 9                                                                                                                                                                                                                                                                                                                                                                                                                                   | or/4-8                                                           |                               |
| 10                                                                                                                                                                                                                                                                                                                                                                                                                                  | 3 not 9                                                          |                               |
| 11                                                                                                                                                                                                                                                                                                                                                                                                                                  | limit 10 to (human and English language and yr="2000 -Current")  |                               |

|    |                                                                 |  |  |
|----|-----------------------------------------------------------------|--|--|
| 12 | limit 11 to article                                             |  |  |
| 13 | transplant*.ti,ab.                                              |  |  |
| 14 | 1 and 13                                                        |  |  |
| 15 | 2 and 14                                                        |  |  |
| 16 | 15 not 9                                                        |  |  |
| 17 | limit 16 to (human and English language and yr="2000 -Current") |  |  |
| 18 | limit 17 to article                                             |  |  |
| 19 | case report/                                                    |  |  |
| 20 | 18 not 19                                                       |  |  |

**Timespan:** 2000-2017 (5 April).  
Search language=Auto

## Supplementary File 2: Details extracted from included studies

| Column ID | Descriptor                                                                                                                                                                                                                                                                                                                                                                                                                       |
|-----------|----------------------------------------------------------------------------------------------------------------------------------------------------------------------------------------------------------------------------------------------------------------------------------------------------------------------------------------------------------------------------------------------------------------------------------|
| A         | EndNote reference number                                                                                                                                                                                                                                                                                                                                                                                                         |
| B         | Title and abstract                                                                                                                                                                                                                                                                                                                                                                                                               |
| C         | Journal title                                                                                                                                                                                                                                                                                                                                                                                                                    |
| D         | url                                                                                                                                                                                                                                                                                                                                                                                                                              |
| E         | 0: Exclude<br>1: Include<br>2: Paper not available<br>3: For discussion                                                                                                                                                                                                                                                                                                                                                          |
| F         | Exclusion reason (see Table 2 for more details)                                                                                                                                                                                                                                                                                                                                                                                  |
| G         | Publication year                                                                                                                                                                                                                                                                                                                                                                                                                 |
| H         | Organ type: 1=hearts; 2=livers; 3=lungs; 4=other(combined)                                                                                                                                                                                                                                                                                                                                                                       |
| I         | Are organ sources (donors) clearly identified as deceased?<br>DD=deceased donors.                                                                                                                                                                                                                                                                                                                                                |
| J         | Number of recipients with deceased or unknown source of transplants reported in research                                                                                                                                                                                                                                                                                                                                         |
| K         | Year/month in which first transplants took place                                                                                                                                                                                                                                                                                                                                                                                 |
| L         | Year/month in which final transplants took place                                                                                                                                                                                                                                                                                                                                                                                 |
| M         | Presence (=1) or absence (=0) of Institutional Review Board (Research Ethics Committee) approval for the research                                                                                                                                                                                                                                                                                                                |
| N         | Copy of text reporting ethics approval, if present                                                                                                                                                                                                                                                                                                                                                                               |
| O         | Information on identity of organ sources:<br>0 = No statement about identity of organ sources<br>1 = Explicit statement that organs came from volunteers or that no prisoners' organs were used<br>2 = Explicit statement that organs came from prisoners<br>3 = Sources mixed (i.e., prisoner and volunteer)<br>4 = Other (make note in column R)                                                                               |
| P         | Copy of text reporting identity of sources, if present. This included any papers in which there was some statement that organs did not come from executed prisoners, or came from volunteers, or source gave consent etc.                                                                                                                                                                                                        |
| Q         | Type of donation:<br>0 = No information<br>DBD = Donation after brain death – (death certified on neurological criteria)<br>DCD = Donation after cardiac death – or non-heart beating (death declared on circulatory criteria)<br>CDCD = China donation after citizen death - (a new China specific descriptor which denotes death declared on both neurological and circulatory criteria)<br>OT = Other (make note in column R) |
| R         | Comments                                                                                                                                                                                                                                                                                                                                                                                                                         |
| S         | Initials of author doing data extraction for this paper                                                                                                                                                                                                                                                                                                                                                                          |
| T         | Initials of author if this entry was checked                                                                                                                                                                                                                                                                                                                                                                                     |
| U         | Institution where transplants took place                                                                                                                                                                                                                                                                                                                                                                                         |

For the Results Table in Supplementary File 4, we have omitted the administrative data e.g EndNote reference numbers, initials of authors doing extractions and checks), the data relating to exclusions (as we are not reporting on these), and the institution where the transplants took place (because this was inconsistently reported by data extractors and was not relevant to the research questions). As a result, the final columns in the Results table are:

| Column ID | Descriptor                                                                                                                                                                                                                                                                                                                                                                                               |
|-----------|----------------------------------------------------------------------------------------------------------------------------------------------------------------------------------------------------------------------------------------------------------------------------------------------------------------------------------------------------------------------------------------------------------|
| A         | Title and abstract                                                                                                                                                                                                                                                                                                                                                                                       |
| B         | Journal title                                                                                                                                                                                                                                                                                                                                                                                            |
| C         | Publication year                                                                                                                                                                                                                                                                                                                                                                                         |
| D         | Organ type                                                                                                                                                                                                                                                                                                                                                                                               |
| E         | Are organ sources (donors) clearly identified as deceased?<br>DD=deceased donors.                                                                                                                                                                                                                                                                                                                        |
| F         | Number of recipients with deceased or unknown source of transplants reported in research                                                                                                                                                                                                                                                                                                                 |
| G         | Year/month in which first transplants took place                                                                                                                                                                                                                                                                                                                                                         |
| H         | Year/month in which final transplants took place                                                                                                                                                                                                                                                                                                                                                         |
| I         | Institutional Review Board (Research Ethics Committee) approval for the research                                                                                                                                                                                                                                                                                                                         |
| J         | Copy of text reporting ethics approval, if present                                                                                                                                                                                                                                                                                                                                                       |
| K         | Information on identity of organ sources:<br>0 = No statement about identity of organ sources<br>1 = Explicit statement that organs came from volunteers or that no prisoners' organs were used<br>2 = Explicit statement that organs came from prisoners<br>3 = Sources mixed (i.e., prisoner and volunteer)<br>4 = Other                                                                               |
| L         | Copy of text reporting identity of sources, if present. This included any papers in which there was some statement that organs did not come from executed prisoners, or came from volunteers, or source gave consent etc.                                                                                                                                                                                |
| M         | Presence (=1) or absence (=0) of                                                                                                                                                                                                                                                                                                                                                                         |
| N         | Type of donation:<br>0 = No information<br>DBD = Donation after brain death – (death certified on neurological criteria)<br>DCD = Donation after cardiac death – or non-heart beating (death declared on circulatory criteria)<br>CDCD = China donation after citizen death - (a new China specific descriptor which denotes death declared on both neurological and circulatory criteria)<br>OT = Other |

**Supplementary File: Full list of 445 studies, bibliographic details**

1. Aidong W, Zhenjie C, Tong L, et al. Therapeutic drug monitoring of tacrolimus in early stage after heart transplantation. *Transplant Proc* 2004;36(8):2388-9 Online First.
2. Awang DVC, Kong L, Jiang W. Schisandra extract elevates concentration of tacrolimus in blood of liver transplant patients. *Focus on Alternative and Complementary Therapies* 2010;15(3):236-37 doi: 10.1111/j.2042-7166.2010.01045\_9.xpublished Online First.
3. Bai DS, Dai Z, Zhou J, et al. Capn4 overexpression underlies tumor invasion and metastasis after liver transplantation for hepatocellular carcinoma. *Hepatology* 2009;49(2):460-70 doi: 10.1002/hep.22638published Online First.
4. Bu X, Zheng Z, Yu Y, et al. Significance of C4d Deposition in the Diagnosis of Rejection After Liver Transplantation. *Transplant Proc* 2006;38(5):1418-21 doi: 10.1016/j.transproceed.2006.03.018published Online First.
5. Cai CJ, Lu MQ, Chen YH, et al. Clinical study on prevention of HBV re-infection by entecavir after liver transplantation. *Clin Transplant* 2012;26(2):208-15 doi: 10.1111/j.1399-0012.2011.01448.xpublished Online First.
6. Cai Q, Li S, Jiang Y, et al. Alleviating graft injury during liver transplantation by improving retrograde perfusion in standard orthotopic liver transplantation. *Int J Clin Exp Med* 2016;9(2):4364-71 Online First.
7. Cai X, Liu F, Zhu F, et al. Cholangiographic features and endoscopic treatment of biliary strictures. *Int J Clin Exp Med* 2015;8(2):2586-92 Online First.
8. Chen B, Gu Z, Chen H, et al. Establishment of high-performance liquid chromatography and enzyme multiplied immunoassay technology methods for determination of free mycophenolic acid and its application in Chinese liver transplant recipients. *Ther Drug Monit* 2010;32(5):653-60 doi: 10.1097/FTD.0b013e3181f01397published Online First.
9. Chen D, Fan J, Guo F, et al. Novel single nucleotide polymorphisms in interleukin 6 affect tacrolimus metabolism in liver transplant patients. *PLoS One* 2013;8(8) doi: 10.1371/journal.pone.0073405published Online First.

10. Chen D, Guo F, Shi J, et al. Association of hemoglobin levels, CYP3A5, and NR1I3 gene polymorphisms with tacrolimus pharmacokinetics in liver transplant patients. *Drug Metab Pharmacokinet* 2014;29(3):249-53 doi: 10.2133/dmpk.DMPK-13-RG-095published Online First.
11. Chen D, Liu S, Chen S, et al. Donor interleukin 6 gene polymorphisms predict the recurrence of hepatocellular carcinoma after liver transplantation. *Int J Clin Oncol* 2016;21(6):1111-19 Online First.
12. Chen G, Liu H, Hu ZQ, et al. A new scheme with infusion of hepatitis B immunoglobulin combined with entecavir for prophylaxis of hepatitis B virus recurrence among liver transplant recipients. *Eur J Gastroenterol Hepatol* 2015;27(8):901-06 doi: 10.1097/MEG.0000000000000388published Online First.
13. Chen GH, Fu BS, Cai CJ, et al. A single-center experience of retransplantation for liver transplant recipients with a failing graft. *Transplant Proc* 2008;40(5):1485-87 doi: 10.1016/j.transproceed.2008.01.076published Online First.
14. Chen GH, Wang GY, Yang Y, et al. Single-center experience of therapeutic management of hepatic artery stenosis after orthotopic liver transplantation: Report of 20 cases. *Eur Surg Res* 2009;42(1):21-27 doi: 10.1159/000166601published Online First.
15. Chen GH, Yang Y, Lu MQ, et al. Liver transplantation for end-stage alcoholic liver disease: a single-center experience from mainland China. *Alcohol* 2010;44(3):217-21 doi: 10.1016/j.alcohol.2010.02.010published Online First.
16. Chen H, Chen E, Mao A, et al. Validation of limited sampling strategy for the estimation of mycophenolic acid exposure in Chinese adult liver transplant recipients. *Liver Transpl* 2007;13(12):1684-93 doi: 10.1002/lt.21293published Online First.
17. Chen H, Gu Z, Chen B, et al. Models for the prediction of mycophenolic acid area under the curve using a limited-sampling strategy and an enzyme multiplied immunoassay technique in chinese patients undergoing liver transplantation. *Clin Ther* 2008;30(12):2387-401 doi: 10.1016/j.clinthera.2008.12.017published Online First.

- 1  
2  
3 18. Chen H, Miao R, Fan J, et al. Decreased expression of miR-126 correlates with  
4 metastatic recurrence of hepatocellular carcinoma. *Clin Exp Metastasis*  
5 2013;30(5):651-58 Online First.  
6  
7
- 8 19. Chen H, Peng C, Yu Z, et al. Pharmacokinetics of mycophenolic acid and  
9 determination of area under the curve by abbreviated sampling strategy in Chinese  
10 liver transplant recipients. *Clin Pharmacokinet* 2007;46(2):175-85 doi:  
11 10.2165/00003088-200746020-00005published Online First.  
12  
13
- 14 20. Chen HY, Han ZB, Fan JW, et al. MiR-203 expression predicts outcome after liver  
15 transplantation for hepatocellular carcinoma in cirrhotic liver. *Med Oncol*  
16 2012;29(3):1859-65 doi: 10.1007/s12032-011-0031-9published Online First.  
17  
18
- 19 21. Chen J, Li Y, Wang L, et al. Association of three SNPs in interleukin-28B with graft  
20 hepatic dysfunction after liver transplantation in Chinese Han population. *Gene*  
21 2012;508(1):121-24 doi: 10.1016/j.gene.2012.07.065published Online First.  
22  
23
- 24 22. Chen J, Wang Y, Shen Z, et al. Early diagnostic value of plasma PCT and BG assay  
25 for CRBSI after OLT. *Transplant Proc* 2011;43(5):1777-79 Online First.  
26  
27
- 28 23. Chen J, Zhong L. Clinical significance of serum hepcidin-25 levels in predicting  
29 invasive fungal disease in patients after transplantation. *Eur Rev Med Pharmacol Sci*  
30 2013;17(13):1769-73 Online First.  
31  
32
- 33 24. Chen P, Wang W, Yan L, et al. Risk factors for first-year hospital readmission after  
34 liver transplantation. *Eur J Gastroenterol Hepatol* 2015;27(5):600-06 doi:  
35 10.1097/MEG.00000000000003272015published Online First.  
36  
37
- 38 25. Chen X, Meng X, Xu Y, et al. Cytokine and human leukocyte antigen (HLA) profile  
39 for graft-versus-host disease (GVHD) after organ transplantation. *Eur J Med Res*  
40 2016;21(1):1-6 Online First.  
41  
42
- 43 26. Chen XY, Hou PF, Bi J, et al. Detection of human cytomegalovirus DNA in various  
44 blood components after liver transplantation. *Braz J Med Biol Res* 2014;47(4):340-44  
45  
46  
47  
48  
49
- 50 27. Chen Y, Zhang H, Xiao X, et al. Peripheral blood transcriptome sequencing reveals  
51 rejection-relevant genes in long-term heart transplantation. *Int J Cardiol*  
52 2013;168(3):2726-33 doi: 10.1016/j.ijcard.2013.03.095published Online First.  
53  
54  
55  
56  
57  
58  
59

- 1  
2  
3 28. Chen YB, Li SD, Ju BL, et al. Suitable calcineurin inhibitor concentrations for liver  
4 transplant recipients in the Chinese population. *Transplant Proc* 2011;43(5):1751-53  
5 doi: 10.1016/j.transproceed.2010.11.025published Online First.  
6  
7
- 8 29. Chen Z, Gong R, Luo Y, et al. Surgical procedures for hepatolithiasis.  
9 *Hepatogastroenterology* 2010;57(97):134-7 Online First.  
10
- 11 30. Chen ZS, Zeng FJ, Ming CS, et al. The survival and value of liver transplantation for  
12 liver carcinoma: a single-center experience. *Transplant Proc* 2004;36(8):2284-6  
13 Online First.  
14
- 15 31. Chen ZY, Yan LN, Zeng Y, et al. Preliminary Experience With Indications for Liver  
16 Transplantation for Hepatolithiasis. *Transplant Proc* 2008;40(10):3517-22 doi:  
17 10.1016/j.transproceed.2008.07.142published Online First.  
18  
19
- 20 32. Cheng J, Xie HY, Xu X, et al. NDRG1 as a biomarker for metastasis, recurrence and  
21 of poor prognosis in hepatocellular carcinoma. *Cancer Lett* 2011;310(1):35-45 Online  
22 First.  
23  
24
- 25 33. Cheng JW, Shi YH, Fan J, et al. An immune function assay predicts post-transplant  
26 recurrence in patients with hepatocellular carcinoma. *J Cancer Res Clin Oncol*  
27 2011;137(10):1445-53 doi: 10.1007/s00432-011-1014-0published Online First.  
28  
29
- 30 34. Cheng L, Tian F, Tang L, et al. Local distribution analysis of cytotoxic molecules in  
31 liver allograft is helpful for the diagnosis of acute cellular rejection after orthotopic  
32 liver transplantation. *Diagn Pathol* 2012;7(1) doi: 10.1186/1746-1596-7-148published  
33 Online First.  
34  
35
- 36 35. Cheng Y, Huang L, Zhang X, et al. Liver transplantation nearly normalizes brain  
37 spontaneous activity and cognitive function at 1 month: A resting-state functional  
38 MRI study. *Metab Brain Dis* 2015;30(4):979-88 doi: 10.1007/s11011-015-9657-  
39 1published Online First.  
40  
41
- 42 36. Cheng Y, Huang LX, Zhang L, et al. Longitudinal intrinsic brain activity changes in  
43 cirrhotic patients before and one month after liver transplantation. *Korean Journal of*  
44 *Radiology* 2017;18(2):370-77 Online First.  
45  
46
- 47 37. Chu Z, Zhang J, Zhao Y, et al. Influence of immunosuppressive drugs on the  
48 development of CD4 +CD25high Foxp3+ T cells in liver transplant recipients.  
49  
50  
51  
52  
53  
54  
55  
56  
57  
58  
59  
60



- 1  
2  
3 Transplant Proc 2010;42(7):2599-601 doi:  
4 10.1016/j.transproceed.2010.04.026published Online First.  
5  
6  
7 38. Chuan W, Li C, Wen TF, et al. Short-term and long-term outcomes of surgical  
8 treatment for HCC within milan criteria with cirrhotic portal hypertension.  
9 Hepatogastroenterology 2014;61(136):2185-90 Online First.  
10  
11 39. Dai X, Zhao HQ, Liu RH, et al. Percutaneous radiofrequency ablation guided by  
12 contrastenhanced ultrasound in treatment of metastatic hepatocellular carcinoma after  
13 liver transplantation. Asian Pac J Cancer Prev 2012;13(8):3709-12 Online First.  
14  
15 40. Dai Y, Li C, Wen TF, et al. Comparison of liver resection and transplantation for  
16 Child-pugh A cirrhotic patient with very early hepatocellular carcinoma and portal  
17 hypertension. Pakistan Journal of Medical Sciences 2014;30(5) doi:  
18 10.12669/pjms.305.5038published Online First.  
19  
20  
21 41. Deng JF, Geng L, Qian YG, et al. The role of toll-like receptors 2 and 4 in acute  
22 allograft rejection after liver transplantation. Transplant Proc 2007;39(10):3222-24  
23 doi: 10.1016/j.transproceed.2007.02.102published Online First.  
24  
25  
26 42. Dong J, Zhu Y, Ma F, et al. Conditional disease-free survival after liver  
27 transplantation for hepatocellular carcinoma: A two-center experience. Medicine  
28 (United States) 2016;95(31) doi: 10.1097/MD.0000000000004383published Online  
29 First.  
30  
31  
32 43. Dong JY, Yin H, Li RD, et al. The relationship between adenosine triphosphate  
33 within CD4+ T lymphocytes and acute rejection after liver transplantation. Clin  
34 Transplant 2011;25(3):E292-E96 doi: 10.1111/j.1399-0012.2011.01429.xpublished  
35 Online First.  
36  
37  
38 44. Duan BW, Lu SC, Lai W, et al. The detection of (total and ccc) HBV DNA in liver  
39 transplant recipients with hepatitis B vaccine against HBV reinfection. Human  
40 Vaccines and Immunotherapeutics 2015;11(10):2490-94 doi:  
41 10.1080/21645515.2015.1063755published Online First.  
42  
43  
44 45. Duan BW, Lu SC, Wu JS, et al. Model for end-stage liver disease (MELD) score does  
45 not predict outcomes of hepatitis be induced acute-on-chronic liver failure in  
46 transplant recipients. Transplant Proc 2014;46(10):3502-06 doi:  
47 10.1016/j.transproceed.2014.07.075published Online First.  
48  
49  
50  
51  
52  
53  
54  
55  
56  
57  
58  
59  
60

- 1
  - 2
  - 3
  - 4
  - 5
  - 6
  - 7
  - 8
  - 9
  - 10
  - 11
  - 12
  - 13
  - 14
  - 15
  - 16
  - 17
  - 18
  - 19
  - 20
  - 21
  - 22
  - 23
  - 24
  - 25
  - 26
  - 27
  - 28
  - 29
  - 30
  - 31
  - 32
  - 33
  - 34
  - 35
  - 36
  - 37
  - 38
  - 39
  - 40
  - 41
  - 42
  - 43
  - 44
  - 45
  - 46
  - 47
  - 48
  - 49
  - 50
  - 51
  - 52
  - 53
  - 54
  - 55
  - 56
  - 57
  - 58
  - 59
  - 60
46. Fan J, Yang GS, Fu ZR, et al. Liver transplantation outcomes in 1,078 hepatocellular carcinoma patients: A multi-center experience in Shanghai, China. *J Cancer Res Clin Oncol* 2009;135(10):1403-12 doi: 10.1007/s00432-009-0584-6published Online First.
47. Fan J, Zhang X, Chen XM, et al. Monitoring of human cytomegalovirus glycoprotein B genotypes using real-time quantitative PCR in immunocompromised Chinese patients. *J Virol Methods* 2009;160(1-2):74-77 Online First.
48. Fan J, Zhang X, Ren L, et al. Donor IL-18 rs5744247 polymorphism as a new biomarker of tacrolimus elimination in Chinese liver transplant patients during the early post-transplantation period: Results from two cohort studies. *Pharmacogenomics* 2015;16(3):239-50 doi: 10.2217/pgs.14.166published Online First.
49. Fan X, Chen Z, Nasralla D, et al. The organ preservation and enhancement of donation success ratio effect of extracorporeal membrane oxygenation in circulatory unstable brain death donor. *Clin Transplant* 2016;30(10):1306-13 Online First.
50. Fang C, Yan S, Liu J, et al. Gastrointestinal perforation after liver transplantation. *Surgical Practice* 2016;20(1):8-12 Online First.
51. Feng ZY, Xu X, Zhu SM, et al. Effects of low central venous pressure during preanhepatic phase on blood loss and liver and renal function in liver transplantation. *World J Surg* 2010;34(8):1864-73 doi: 10.1007/s00268-010-0544-ypublished Online First.
52. Fu BS, Zhang T, Li H, et al. The role of liver transplantation for intrahepatic cholangiocarcinoma: A single-center experience. *Eur Surg Res* 2011;47(4):218-21 doi: 10.1159/000332827published Online First.
53. Fu SJ, Ji F, Han M, et al. Prognostic value of combined preoperative fibrinogen and neutrophil-lymphocyte ratio in patients with hepatocellular carcinoma after liver transplantation. *Oncotarget* 2017;8(3):4301-12 Online First.
54. Fu YW, Wang WG, Zhou HL, et al. Presence of donor-and-recipient-derived DNA microchimerism in the cell-free blood samples of renal transplantation recipients associates with the acceptance of transplanted kidneys. *Asian Journal of Andrology* 2006;8(4):477-82 doi: 10.1111/j.1745-7262.2006.00147.xpublished Online First.

- 1  
2  
3 55. Gao F, Ye Q, Wan Q, et al. Distribution and resistance of pathogens in liver  
4 transplant recipients with *Acinetobacter baumannii* infection. *Ther Clin Risk Manag*  
5 2015;11:501-05 doi: 10.2147/TCRM.S82251published Online First.  
6  
7  
8 56. Gao PJ, Gao J, Li Z, et al. Hepatocellular carcinoma recurrence is an independent risk  
9 factor for HB recurrence after liver transplantation. *Hepatogastroenterology*  
10 2014;61(134):1523-28 doi: 10.5754/hge14454published Online First.  
11  
12  
13 57. Gao PJ, Gao J, Li Z, et al. Liver transplantation in adults with portal vein thrombosis:  
14 Data from the China Liver Transplant Registry. *Clinics and Research in Hepatology*  
15 and *Gastroenterology* 2016;40(3):327-32 Online First.  
16  
17  
18 58. Gao S, Lin BY, Yang Z, et al. Role of overexpression of MACC1 and/or FAK in  
19 predicting prognosis of hepatocellular carcinoma after liver transplantation. *Int J Med*  
20 *Sci* 2014;11(3):268-75 doi: 10.7150/ijms.7769published Online First.  
21  
22  
23 59. Gao S, Yang Z, Zheng ZY, et al. Reduced expression of DACT2 promotes  
24 hepatocellular carcinoma progression: Involvement of methylation-mediated gene  
25 silencing. *World J Surg Oncol* 2013;11 Online First.  
26  
27  
28 60. Gao Y, Ren H, Meng F, et al. Pathological roles of interleukin-22 in the development  
29 of recurrent hepatitis C after liver transplantation. *PLoS One* 2016;11(4) doi:  
30 10.1371/journal.pone.0154419published Online First.  
31  
32  
33 61. Gao Y, Zhang M, Li J, et al. Circulating FoxP3+ regulatory T and interleukin17-  
34 producing Th17 cells actively influence HBV clearance in De Novo Hepatitis B virus  
35 infected patients after orthotopic liver transplantation. *PLoS One* 2015;10(9) doi:  
36 10.1371/journal.pone.0137881published Online First.  
37  
38  
39 62. Gao YJ, Zhang M, Jin B, et al. A clinical-pathological analysis of hepatitis B virus  
40 recurrence after liver transplantation in Chinese patients. *Journal of Gastroenterology*  
41 and *Hepatology (Australia)* 2014;29(3):554-60 doi: 10.1111/jgh.12404published  
42 Online First.  
43  
44  
45 63. Gu L, Jin W, Kan L, et al. A retrospective study to compare the use of tacrolimus and  
46 cyclosporine in combination with adriamycin in post-transplant liver cancer patients.  
47 *Cell Biochem Biophys* 2014;71(2):565-70 doi: 10.1007/s12013-014-0235-7published  
48 Online First.  
49  
50  
51  
52  
53  
54  
55  
56  
57  
58  
59

- 1  
2  
3 64. Gu L, Yu YC. Clinical outcome of dental implants placed in liver transplant  
4 recipients after 3 years: A case series. *Transplant Proc* 2011;43(7):2678-82 doi:  
5 10.1016/j.transproceed.2011.06.037published Online First.  
6  
7  
8 65. Gu LH, Fang H, Li FH, et al. Prediction of early hepatic artery thrombosis by  
9 intraoperative color doppler ultrasound in pediatric segmental liver transplantation.  
10 *Clin Transplant* 2012;26(4):571-76 doi: 10.1111/j.1399-0012.2011.01580.xpublished  
11 Online First.  
12  
13  
14 66. Gu Z, Chen B, Song Y, et al. Pharmacokinetics of free mycophenolic acid and limited  
15 sampling strategy for the estimation of area under the curve in liver transplant  
16 patients. *Eur J Pharm Sci* 2012;47(4):636-41 doi:  
17 10.1016/j.ejps.2012.08.001published Online First.  
18  
19  
20 67. Guo CB, Li YC, Zhang MM, et al. Early postoperative care of liver transplantation  
21 for infants with biliary atresia during pediatric intensive care unit stay. *Transplant*  
22 *Proc* 2010;42(5):1750-54 doi: 10.1016/j.transproceed.2010.02.086published Online  
23 First.  
24  
25  
26 68. Guo QL, Duan BW, Lu SC, et al. Liver transplantation for hepatitis B-related acute-  
27 on-chronic liver failure patients. *Int J Clin Exp Med* 2017;10(2):2882-89 Online First.  
28  
29  
30 69. Guo W, Sheng J, Gu Y, et al. Analysis and forecast for multidrug-resistant  
31 *Acinetobacter baumannii* infections among liver transplant recipients. *Transplant*  
32 *Proc* 2014;46(5):1448-52 doi: 10.1016/j.transproceed.2014.02.027published Online  
33 First.  
34  
35  
36 70. Guo Z, He X, Wu L, et al. Model for end-stage liver disease versus the Child-Pugh  
37 score in predicting the post-transplant 3-month and 1-year mortality in a cohort of  
38 Chinese recipients. *Surg Today* 2010;40(1):38-45 doi: 10.1007/s00595-009-4114-  
39 6published Online First.  
40  
41  
42 71. Gurbanov E, Meng X, Cui Y, et al. Evaluation ECMO in adult cardiac transplantation:  
43 can outcomes of marginal donor hearts be improved? *J Cardiovasc Surg (Torino)*  
44 2011;52(3):419-27 Online First.  
45  
46  
47 72. Han ZB, Chen HY, Fan JW, et al. Up-regulation of microRNA-155 promotes cancer  
48 cell invasion and predicts poor survival of hepatocellular carcinoma following liver  
49 transplantation. *J Cancer Res Clin Oncol* 2011:1-9 Online First.  
50  
51  
52  
53  
54  
55  
56  
57  
58  
59  
60

- 1  
2  
3 73. Han ZB, Zhong L, Teng MJ, et al. Identification of recurrence-related microRNAs in  
4 hepatocellular carcinoma following liver transplantation. *Mol Oncol* 2012;6(4):445-  
5 57 doi: 10.1016/j.molonc.2012.04.001published Online First.  
6  
7  
8 74. Hao C, Anwei M, Bing C, et al. Monitoring mycophenolic acid pharmacokinetic  
9 parameters in liver transplant recipients: prediction of occurrence of leukopenia.  
10 *Liver Transpl* 2008;14(8):1165-73 Online First.  
11  
12 75. Hao C, Erzheng C, Anwei M, et al. Validation of limited sampling strategy for the  
13 estimation of mycophenolic acid exposure in Chinese adult liver transplant recipients.  
14 *Liver Transpl* 2007;13(12):1684-93 Online First.  
15  
16 76. Hei Z, Chi X, Cheng N, et al. Upregulation of TLR2/4 expression in mononuclear  
17 cells in postoperative systemic inflammatory response syndrome after liver  
18 transplantation. *Mediators Inflamm* 2010;2010 doi: 10.1155/2010/519589published  
19 Online First.  
20  
21 77. Hu B, Gao DJ, Yu FH, et al. Endoscopic stenting for post-transplant biliary stricture:  
22 Usefulness of a novel removable covered metal stent. *Journal of Hepato-Biliary-*  
23 *Pancreatic Sciences* 2011;18(5):640-45 doi: 10.1007/s00534-011-0408-3published  
24 Online First.  
25  
26 78. Hu J, Wang Z, Fan J, et al. Genetic variations in plasma circulating DNA of HBV-  
27 related hepatocellular carcinoma patients predict recurrence after liver transplantation.  
28 *PLoS One* 2011;6(10) doi: 10.1371/journal.pone.0026003published Online First.  
29  
30 79. Hu J, Xie X, Li Y, et al. A novel noninvasive method to detect rejection after heart  
31 transplantation. *Braz J Med Biol Res* 2012;45(12):1195-201 doi: 10.1590/S0100-  
32 879X2012007500164published Online First.  
33  
34 80. Hu WY, Wu LQ, Su Z, et al. Expression of human leukocyte antigen-G and acute  
35 rejection in patients following liver transplantation. *Exp Ther Med* 2014;8(4):1291-95  
36 doi: 10.3892/etm.2014.1917published Online First.  
37  
38 81. Hu XX, Yan LN. Retrospective analysis of prognostic factors after liver  
39 transplantation for intrahepatic cholangiocarcinoma in China: A single-center  
40 experience. *Hepatogastroenterology* 2011;58(109):1255-59 doi:  
41 10.5754/hge10704published Online First.  
42  
43  
44  
45  
46  
47  
48  
49  
50  
51  
52  
53  
54  
55  
56  
57  
58  
59  
60

- 1  
2  
3 82. Hu Y, Zhang X, Liu Y, et al. APACHE IV is superior to MELD scoring system in  
4 predicting prognosis in patients after orthotopic liver transplantation. *Clinical and*  
5 *Developmental Immunology* 2013;2013 doi: 10.1155/2013/809847published Online  
6 First.  
7  
8  
9  
10 83. Hu Z, Zhou J, Li Z, et al. Salvage liver transplantation for recurrent hepatocellular  
11 carcinoma after liver resection: Retrospective study of the Milan and Hangzhou  
12 criteria. *PLoS One* 2014;9(1) doi: 10.1371/journal.pone.0087222published Online  
13 First.  
14  
15  
16  
17 84. Hu Z, Zhou J, Li Z, et al. Time interval to recurrence as a predictor of overall survival  
18 in salvage liver transplantation for patients with hepatocellular carcinoma associated  
19 with hepatitis B virus. *Surgery (United States)* 2015;157(2):239-48 doi:  
20 10.1016/j.surg.2014.09.018published Online First.  
21  
22  
23  
24 85. Huang J, Yan L, Wu H, et al. Is radiofrequency ablation applicable for recurrent  
25 hepatocellular carcinoma after liver transplantation? *J Surg Res* 2016;200(1):122-30  
26 Online First.  
27  
28  
29 86. Huang L, Li GM, Zhu JY, et al. Efficacy of sorafenib after liver transplantation in  
30 patients with primary hepatic carcinoma exceeding the Milan criteria: A preliminary  
31 study. *Onco Targets Ther* 2012;5:457-62 doi: 10.2147/OTT.S31387published Online  
32 First.  
33  
34  
35  
36 87. Huang M, Shan H, Jiang Z, et al. The use of coronary stent in hepatic artery stenosis  
37 after orthotopic liver transplantation. *Eur J Radiol* 2006;60(3):425-30 doi:  
38 10.1016/j.ejrad.2006.06.008published Online First.  
39  
40  
41 88. Huang Q, Zhai RY, Dai DK. Interventional Treatment of Hepatic Artery Stenosis  
42 After Orthotopic Liver Transplantation With Balloon-Expandable Coronary Stent.  
43 *Transplant Proc* 2007;39(10):3245-50 doi:  
44 10.1016/j.transproceed.2007.03.109published Online First.  
45  
46  
47  
48 89. Huang Y, Yang X, Zhao F, et al. Overexpression of Dickkopf-1 predicts poor  
49 prognosis for patients with hepatocellular carcinoma after orthotopic liver  
50 transplantation by promoting cancer metastasis and recurrence. *Med Oncol* 2014;31  
51 (7) Online First.  
52  
53  
54  
55  
56  
57  
58  
59  
60

- 1  
2  
3 90. Huang ZY, Liang BY, Xiong M, et al. Severity of cirrhosis should determine the  
4 operative modality for patients with early hepatocellular carcinoma and compensated  
5 liver function. *Surgery (United States)* 2016;159(2):621-31 Online First.  
6  
7  
8 91. Huijun M, Ji Z, Ping X, et al. Linkage disequilibrium between *tnf- $\alpha$* -308 G/A  
9 promoter and histocompatibility leukocyte antigen alleles in han-nationality lung  
10 transplant recipients from eastern china. *Exp Clin Transplant* 2013;11(3):264-69 doi:  
11 10.6002/ect.2012.0099published Online First.  
12  
13  
14  
15 92. Jiang GQ, Bai DS, Chen P, et al. Starting hemoglobin value predicts early phase  
16 prognosis after liver transplantation. *Transplant Proc* 2011;43(5):1669-73 doi:  
17 10.1016/j.transproceed.2010.12.067published Online First.  
18  
19  
20 93. Jiang L, Lei JY, Wang WT, et al. Immediate radical therapy or conservative  
21 treatments when meeting the Milan criteria for advanced HCC patients after  
22 successful TACE. *J Gastrointest Surg* 2014;18(6):1125-30 Online First.  
23  
24  
25 94. Jiang T, Li C, Duan B, et al. Risk factors for and management of ischemic-type  
26 biliary lesions following orthotopic liver transplantation: A single center experience.  
27 *Ann Hepatol* 2016;15(1):41-46 doi: 10.5604/16652681.1184204published Online  
28 First.  
29  
30  
31  
32 95. Jiang T, Liu S, Xiao X, et al. Diagnosis of rejection after liver transplantation: Use of  
33 phosphorus-31 magnetic resonance spectroscopy (31P-MRS). *Abdom Imaging*  
34 2012;37(5):788-94 doi: 10.1007/s00261-008-9451-1published Online First.  
35  
36  
37 96. Jiang Z, Chen Y, Feng X, et al. Recipient cytotoxic T lymphocyte antigen 4 +49  
38 single-nucleotide polymorphism is not associated with acute rejection after liver  
39 transplantation in Chinese population. *Int J Med Sci* 2013;10(3):250-54 doi:  
40 10.7150/ijms.5511published Online First.  
41  
42  
43  
44 97. Jiang Z, Feng X, Zhang W, et al. Recipient cytotoxic T lymphocyte antigen-4 +49  
45 G/G genotype is associated with reduced incidence of hepatitis B virus recurrence  
46 after liver transplantation among Chinese patients. *Liver International*  
47 2007;27(9):1202-08 doi: 10.1111/j.1478-3231.2007.01553.xpublished Online First.  
48  
49  
50 98. Jiao ZY, Jiao Z. Prophylaxis of recurrent hepatitis b in Chinese patients after liver  
51 transplantation using lamivudine combined with Hepatitis B immune globulin  
52  
53  
54  
55  
56  
57  
58  
59  
60

- 1  
2  
3 according to the titer of antibody to Hepatitis B surface antigen. *Transplant Proc*  
4 2007;39(5):1533-36 doi: 10.1016/j.transproceed.2007.03.062published Online First.  
5  
6 99. Jin R, Duan H, Zhao C, et al. Pharmacokinetics of cyclosporine A in Chinese heart  
7 transplant recipients. *Immunopharmacol Immunotoxicol* 2012;34(3):519-22 doi:  
8 10.3109/08923973.2011.613400published Online First.  
9  
10 100. Jin Z, Zhang WX, Chen B, et al. Stepwise regression analysis of the determinants of  
11 blood tacrolimus concentrations in Chinese patients with liver transplant. *Medicinal*  
12 *Chemistry* 2009;5(3):301-04 doi: 10.2174/157340609788185918published Online  
13 First.  
14  
15 101. Ju W, Chen M, Guo Z, et al. Allografts positive for hepatitis B surface antigen in liver  
16 transplant for disease related to hepatitis B virus. *Exp Clin Transplant*  
17 2013;11(3):245-49 doi: 10.6002/ect.2012.0095published Online First.  
18  
19 102. Ju WQ, Guo ZY, Liang WH, et al. Sirolimus conversion in liver transplant recipients  
20 with calcineurin inhibitor-induced complications: Efficacy and safety. *Exp Clin*  
21 *Transplant* 2012;10(2):132-35 doi: 10.6002/ect.2010.0126published Online First.  
22  
23 103. Ju WQ, Guo ZY, Ling X, et al. Twenty-four hour steroid avoidance  
24 immunosuppressive regimen in liver transplant recipients. *Exp Clin Transplant*  
25 2012;10(3):258-62 doi: 10.6002/ect.2010.0127published Online First.  
26  
27 104. Kong HY, Huang SQ, Zhu SM, et al. Role of anhepatic time in endothelial-related  
28 coagulation in liver transplantation. *Minerva Anesthesiol* 2013;79(4):391-97 Online  
29 First.  
30  
31 105. Kong HY, Wen XH, Huang SQ, et al. Epsilon-aminocaproic acid improves  
32 postrecirculation hemodynamics by reducing intraliver activated protein C  
33 consumption in orthotopic liver transplantation. *World J Surg* 2014;38(1):177-85 doi:  
34 10.1007/s00268-013-2282-4published Online First.  
35  
36 106. Lai MC, Yang Z, Zhou L, et al. Long non-coding RNA MALAT-1 overexpression  
37 predicts tumor recurrence of hepatocellular carcinoma after liver transplantation. *Med*  
38 *Oncol* 2012;29(3):1810-16 doi: 10.1007/s12032-011-0004-zpublished Online First.  
39  
40 107. Lei J, Wang W, Yan L. Downstaging advanced hepatocellular carcinoma to the Milan  
41 criteria may provide a comparable outcome to conventional Milan criteria. *J*  
42 *Gastrointest Surg* 2013;17(8):1440-6 Online First.  
43  
44  
45  
46  
47  
48  
49  
50  
51  
52  
53  
54  
55  
56  
57  
58  
59  
60



- 1  
2  
3 108. Lei J, Yan L. Outcome comparisons among the Hangzhou, Chengdu, and UCSF  
4 criteria for hepatocellular carcinoma liver transplantation after successful  
5 downstaging therapies. *J Gastrointest Surg* 2013;17(6):1116-22 doi: 10.1007/s11605-  
6 013-2140-6published Online First.  
7  
8  
9  
10 109. Lei JY, Wang WT, Yan LN. Hangzhou criteria for liver transplantation in  
11 hepatocellular carcinoma: A single-center experience. *Eur J Gastroenterol Hepatol*  
12 2014;26(2):200-04 doi: 10.1097/MEG.0b013e3283652b66published Online First.  
13  
14  
15 110. Lei JY, Yan LN, Wang WT, et al. Health-related quality of life and psychological  
16 distress in patients with early-stage hepatocellular carcinoma after hepatic resection  
17 or transplantation. *Transplant Proc* 2016;48(6):2107-11 Online First.  
18  
19  
20 111. Lei JY, Yan LN, Zhu JQ, et al. Hepatocellular carcinoma patients may benefit from  
21 postoperative huaier aqueous extract after liver transplantation. *Transplant Proc*  
22 2015;47(10):2920-24 doi: 10.1016/j.transproceed.2015.10.045published Online First.  
23  
24  
25 112. Li C, Zhang F, Zhang W, et al. Feasibility of 125I brachytherapy combined with  
26 sorafenib treatment in patients with multiple lung metastases after liver  
27 transplantation for hepatocellular carcinoma. *J Cancer Res Clin Oncol*  
28 2010;136(11):1633-40 doi: 10.1007/s00432-010-0821-zpublished Online First.  
29  
30  
31 113. Li C, Zhu WJ, Wen TF, et al. Child-Pugh A Hepatitis B-Related Cirrhotic Patients  
32 with a Single Hepatocellular Carcinoma Up to 5 cm: Liver Transplantation vs.  
33 Resection. *J Gastrointest Surg* 2014;18(8):1469-76 doi: 10.1007/s11605-014-2550-  
34 0published Online First.  
35  
36  
37 114. Li D, Lu T, Shen C, et al. Expression of fibroblast growth factor 21 in patients with  
38 biliary atresia. *Cytokine* 2016;83:13-18 Online First.  
39  
40  
41 115. Li D, Lu W, Zhu JY, et al. Population pharmacokinetics of tacrolimus and CYP3A5,  
42 MDR1 and IL-10 polymorphisms in adult liver transplant patients. *J Clin Pharm Ther*  
43 2007;32(5):505-15 doi: 10.1111/j.1365-2710.2007.00850.xpublished Online First.  
44  
45  
46 116. Li D, Zhu JY, Gao J, et al. Polymorphisms of tumor necrosis factor- $\alpha$ , interleukin-10,  
47 cytochrome P450 3A5 and ABCB1 in Chinese liver transplant patients treated with  
48 immunosuppressant tacrolimus. *Clin Chim Acta* 2007;383(1-2):133-39 doi:  
49 10.1016/j.cca.2007.05.008published Online First.  
50  
51  
52  
53  
54  
55  
56  
57  
58  
59  
60

- 1  
2  
3 117. Li F, Yang M, Li B, et al. Initial clinical results of orthotopic liver transplantation for  
4 hepatic alveolar echinococcosis. *Liver Transpl* 2007;13(6):924-26 doi:  
5  
6 10.1002/lt.21187published Online First.  
7  
8 118. Li H, He JW, Fu BS, et al. Immunosuppressant-related hip pain after orthotopic liver  
9 transplant. *Exp Clin Transplant* 2013;11(1):32-38 doi:  
10  
11 10.6002/ect.2012.0026published Online First.  
12  
13 119. Li H, Li B, Wei Y, et al. Preoperative transarterial chemoembolization does not  
14 increase hepatic artery complications after liver transplantation: A single center 12-  
15 year experience. *Clinics and Research in Hepatology and Gastroenterology*  
16 2015;39(4):451-57 doi: 10.1016/j.clinre.2014.12.004published Online First.  
17  
18 120. Li H, Li J, Wang Y, et al. Proteomic analysis of effluents from perfused human heart  
19 for transplantation: Identification of potential biomarkers for ischemic heart damage.  
20 *Proteome Science* 2012;10(1) doi: 10.1186/1477-5956-10-21published Online First.  
21  
22 121. Li H, Wang S, Wang G, et al. Yes-associated protein expression is a predictive  
23 marker for recurrence of hepatocellular carcinoma after liver transplantation. *Dig*  
24 *Surg* 2014;31(6):468-78 doi: 10.1159/000370252published Online First.  
25  
26 122. Li H, Xie HY, Zhou L, et al. Copy number variation in CCL3L1 gene is associated  
27 with susceptibility to acute rejection in patients after liver transplantation. *Clin*  
28 *Transplant* 2012;26(2):314-21 doi: 10.1111/j.1399-0012.2011.01486.xpublished  
29 Online First.  
30  
31 123. Li H, Xie HY, Zhou L, et al. Lack of association of the polymorphism of the CCR5  
32 gene in liver recipients with acute rejection from China. *Exp Clin Transplant*  
33 2011;9(4):252-57 Online First.  
34  
35 124. Li H, Yang S, Chen H, et al. Survival after heart transplantation for non-metastatic  
36 primary cardiac sarcoma. *J Cardiothorac Surg* 2016;11(1):145 Online First.  
37  
38 125. Li J, Bai Y, Wang L, et al. Regulatory Effect of FK506 on CD152 and PD-1 in the  
39 Liver Allorecipients. *Transplant Proc* 2008;40(5):1495-97 Online First.  
40  
41 126. Li J, Liu B, Yan LN, et al. Reversal of graft steatosis after liver transplantation:  
42 prospective study. *Transplant Proc* 2009;41(9):3560-63 doi:  
43  
44 10.1016/j.transproceed.2009.06.222published Online First.  
45  
46  
47  
48  
49  
50  
51  
52  
53  
54  
55  
56  
57  
58  
59  
60

- 1  
2  
3 127. Li MR, Chen GH, Cai CJ, et al. High hepatitis B virus DNA level in serum before  
4 liver transplantation increases the risk of hepatocellular carcinoma recurrence.  
5 *Digestion* 2011;84(2):134-41 doi: 10.1159/000324197published Online First.  
6  
7  
8 128. Li N, Zhou J, Weng D, et al. Adjuvant adenovirus-mediated delivery of herpes  
9 simplex virus thymidine kinase administration improves outcome of liver  
10 transplantation in patients with advanced hepatocellular carcinoma. *Clin Cancer Res*  
11 2007;13(19):5847-54 Online First.  
12  
13  
14  
15 129. Li Q, Yao G, Ge Q, et al. Relevant risk factors affecting time of ventilation during  
16 early postoperative period after orthotopic liver transplantation. *J Crit Care*  
17 2010;25(2):221-24 doi: 10.1016/j.jcrc.2009.06.048published Online First.  
18  
19  
20 130. Li QY, Qin YS, Ling Q, et al. No therapeutic ERCP in anastomotic stricture without  
21 intrahepatic biliary dilation after liver transplantation. *Hepatogastroenterology*  
22 2011;58(109):1127-31 doi: 10.5754/hge11268published Online First.  
23  
24  
25 131. Li RD, Sun Z, Dong JY, et al. A quantitative assessment model of T-cell immune  
26 function for predicting risks of infection and rejection during the early stage after  
27 liver transplantation. *Clin Transplant* 2013;27(5):666-72 doi:  
28 10.1111/ctr.12187published Online First.  
29  
30  
31  
32 132. Li T, Chen ZS, Zeng FJ, et al. Impact of early biliary complications in liver  
33 transplantation in the presence or absence of a T-tube: A Chinese transplant centre  
34 experience. *Postgrad Med J* 2007;83(976):120-23 doi:  
35 10.1136/pgmj.2006.049171published Online First.  
36  
37  
38 133. Li W, Yuan G, Liu H, et al. Comparison of HPLC-MS/MS and enzyme-multiplied  
39 immunoassay in tacrolimus determination and its application in therapeutic drug  
40 monitoring. *Latin American Journal of Pharmacy* 2015;34(8):1540-46 Online First.  
41  
42  
43 134. Li WX, Li Z, Gao PJ, et al. Histological differentiation predicts post-liver  
44 transplantation survival time. *Clinics and Research in Hepatology and*  
45 *Gastroenterology* 2014;38(2):201-08 doi: 10.1016/j.clinre.2013.11.002published  
46 Online First.  
47  
48  
49  
50 135. Li X, Chi X, Luo G, et al. Ulinastatin ameliorates acute kidney injury following liver  
51 transplantation in rats and humans. *Exp Ther Med* 2015;9(2):411-16 Online First.  
52  
53  
54  
55  
56  
57  
58  
59  
60

- 1  
2  
3 136. Li X, Li X, Chi X, et al. Ulinastatin ameliorates acute kidney injury following liver  
4 transplantation in rats and humans. *Exp Ther Med* 2015;9(2):411-16 doi:  
5 10.3892/etm.2014.2088published Online First.  
6  
7  
8 137. Li Y, Shi Y, Chen J, et al. Association of polymorphisms in interleukin-18 and  
9 interleukin-28b with hepatitis b recurrence after liver transplantation in chinese han  
10 population. *Int J Immunogenet* 2012;39(4):346-52 doi: 10.1111/j.1744-  
11 313X.2012.01097.xpublished Online First.  
12  
13  
14 138. Li Y, Zhu M, Xia Q, et al. Urinary neutrophil gelatinase-associated lipocalin and L-  
15 type fatty acid binding protein as diagnostic markers of early acute kidney injury after  
16 liver transplantation. *Biomarkers* 2012;17(4):336-42 doi:  
17 10.3109/1354750X.2012.672458published Online First.  
18  
19  
20 139. Li Y, Zou Y, Cai B, et al. The associations of IL-18 serum levels and promoter  
21 polymorphism with tacrolimus pharmacokinetics and hepatic allograft dysfunction in  
22 Chinese liver transplantation recipients. *Gene* 2012;491(2):251-55 doi:  
23 10.1016/j.gene.2011.10.008published Online First.  
24  
25  
26 140. Liang TB, Bai XL, Li DL, et al. Early Postoperative hemorrhage requiring urgent  
27 surgical reintervention after orthotopic liver transplantation. *Transplant Proc*  
28 2007;39(5):1549-53 doi: 10.1016/j.transproceed.2007.01.080published Online First.  
29  
30  
31 141. Liang TB, Li DL, Liang L, et al. Intraoperative blood salvage during liver  
32 transplantation in patients with hepatocellular carcinoma: Efficiency of leukocyte  
33 depletion filters in the removal of tumor cells. *Transplantation* 2008;85(6):863-69 doi:  
34 10.1097/TP.0b013e3181671f2epublished Online First.  
35  
36  
37 142. Liang TB, Li JJ, Li DL, et al. Intraoperative blood salvage and leukocyte depletion  
38 during liver transplantation with bacterial contamination. *Clin Transplant*  
39 2010;24(2):265-72 doi: 10.1111/j.1399-0012.2009.01091.xpublished Online First.  
40  
41  
42 143. Lianghui G, Shusen Z, Tingbo L, et al. Deferred versus prophylactic therapy with  
43 gancyclovir for cytomegalovirus in allograft liver transplantation. *Transplant Proc*  
44 2004;36(5):1502-05 doi: 10.1016/j.transproceed.2004.04.079published Online First.  
45  
46  
47 144. Lin B, Geng L, Zheng Z, et al. The predictive value of blood neutrophil-lymphocyte  
48 ratio in patients with end-stage liver cirrhosis following ABO-incompatible liver  
49 transplantation. *J Res Med Sci* 2016;21(5):20-25 Online First.  
50  
51  
52  
53  
54  
55  
56  
57  
58  
59  
60

- 1  
2  
3 145. Lin MJ, Yang YL, Yu Q, et al. Value of percutaneous transhepatic cholangioscopy in  
4 the treatment of biliary cast after liver transplantation. *Int J Clin Exp Med*  
5 2016;9(2):1263-71 Online First.  
6  
7  
8 146. Lin XH, Teng S, Wang L, et al. Fatigue and its associated factors in liver transplant  
9 recipients in Beijing: A cross-sectional study. *BMJ Open* 2017;7 (2) Online First.  
10  
11  
12 147. Lin YH, Cai ZS, Jiang Y, et al. Perioperative risk factors for pulmonary  
13 complications after liver transplantation. *J Int Med Res* 2010;38(5):1845-55 Online  
14 First.  
15  
16  
17 148. Ling L, He X, Zeng J, et al. In-hospital cerebrovascular complications following  
18 orthotopic liver transplantation: a retrospective study. *BMC Neurol* 2008;8:52 Online  
19 First.  
20  
21  
22 149. Ling Q, Xie H, Li J, et al. Donor Graft MicroRNAs: A Newly Identified Player in the  
23 Development of New-onset Diabetes After Liver Transplantation. *Am J Transplant*  
24 2017;17(1):255-64 Online First.  
25  
26  
27 150. Ling Q, Xie H, Lu D, et al. Association between donor and recipient TCF7L2 gene  
28 polymorphisms and the risk of new-onset diabetes mellitus after liver transplantation  
29 in a Han Chinese population. *J Hepatol* 2013;58(2):271-77 doi:  
30 10.1016/j.jhep.2012.09.025published Online First.  
31  
32  
33 151. Ling Q, Xu X, Li J, et al. A new serum cystatin C-based equation for assessing  
34 glomerular filtration rate in liver transplantation. *Clin Chem Lab Med*  
35 2008;46(3):405-10 doi: 10.1515/CCLM.2008.052published Online First.  
36  
37  
38 152. Ling Q, Xu X, Wang K, et al. Donor PPAR $\gamma$  Gene polymorphisms influence the  
39 susceptibility to glucose and lipid disorders in liver transplant recipients. *medicine*  
40 (United States) 2015;94(35):e1421 doi: 10.1097/MD.0000000000001421published  
41 Online First.  
42  
43  
44 153. Ling Q, Xu X, Wei Q, et al. Downgrading MELD improves the outcomes after liver  
45 transplantation in patients with acute-on-chronic hepatitis B liver failure. *PLoS One*  
46 2012;7(1) doi: 10.1371/journal.pone.0030322published Online First.  
47  
48  
49 154. Ling Q, Xu X, Wei Q, et al. Impact of preexisting diabetes mellitus on outcome after  
50 liver transplantation in patients with hepatitis B virus-related liver disease. *Dig Dis*  
51 *Sci* 2011;56(3):889-93 doi: 10.1007/s10620-010-1358-3published Online First.  
52  
53  
54  
55  
56  
57  
58  
59

- 1  
2  
3 155. Liu B, Teng F, Fu H, et al. Excessive intraoperative blood loss independently predicts  
4 recurrence of hepatocellular carcinoma after liver transplantation. *BMC Gastroenterol*  
5 2015;15(1) doi: 10.1186/s12876-015-0364-5published Online First.  
6  
7  
8 156. Liu C, Shang YF, Zhang XF, et al. Co-administration of grapefruit juice increases  
9 bioavailability of tacrolimus in liver transplant patients: A prospective study. *Eur J*  
10 *Clin Pharmacol* 2009;65(9):881-85 doi: 10.1007/s00228-009-0702-zpublished Online  
11 First.  
12  
13  
14  
15 157. Liu C, Tsai HL, Chin T, et al. Experience of surgical treatment for hepatoblastoma.  
16 *Formosan Journal of Surgery* 2016;49(2):56-62 Online First.  
17  
18  
19 158. Liu CZ, Hu SY, Jin B, et al. Hemodialysis-induced hyperglycemia after liver  
20 transplantation. *Hepatogastroenterology* 2008;55(88):2175-77 Online First.  
21  
22  
23 159. Liu D, Huang P, Li X, et al. Using inflammatory and oxidative biomarkers in urine to  
24 predict early acute kidney injury in patients undergoing liver transplantation.  
25 *Biomarkers* 2014;19(5):424-29 doi: 10.3109/1354750X.2014.924997published  
26 Online First.  
27  
28  
29 160. Liu D, Luo G, Luo C, et al. Changes in the concentrations of mediators of  
30 inflammation and oxidative stress in exhaled breath condensate during liver  
31 transplantation and their relations with postoperative ARDS. *Respir Care*  
32 2015;60(5):679-88 doi: 10.4187/respcare.03311published Online First.  
33  
34  
35 161. Liu J, Yan J, Wan Q, et al. The risk factors for tuberculosis in liver or kidney  
36 transplant recipients. *BMC Infect Dis* 2014;14(1) doi: 10.1186/1471-2334-14-  
37 387published Online First.  
38  
39  
40  
41 162. Liu S, Bai Y, Huang J, et al. Do mitochondria contribute to left ventricular non-  
42 compaction cardiomyopathy? New findings from myocardium of patients with left  
43 ventricular non-compaction cardiomyopathy. *Mol Genet Metab* 2013;109(1):100-06  
44 Online First.  
45  
46  
47  
48 163. Liu S, Fan J, Wang X, et al. Intraoperative cryoprecipitate transfusion and its  
49 association with the incidence of biliary complications after liver transplantation-a  
50 retrospective cohort study. *PLoS One* 2013;8(5) doi:  
51 10.1371/journal.pone.0060727published Online First.  
52  
53  
54  
55  
56  
57  
58  
59  
60

- 1  
2  
3 164. Liu S, Wang X, Lu Y, et al. The effects of intraoperative cryoprecipitate transfusion  
4 on acute renal failure following orthotopic liver transplantation. *Hepatology*  
5 *International* 2013;7(3):901-09 doi: 10.1007/s12072-013-9457-9published Online  
6 First.  
7  
8  
9  
10 165. Liu S, Xing T, Sheng T, et al. The reduction rate of serum C3 following liver  
11 transplantation is an effective predictor of non-anastomotic strictures. *Hepatology*  
12 *International* 2014;8(2):293-300 doi: 10.1007/s12072-014-9524-xpublished Online  
13 First.  
14  
15  
16  
17 166. Liu X, Wang B, Zhang X, et al. Liver transplantation using donation after brain and  
18 cardiac death: a single-center experience in China. *Transplant Proc* 2016;48(6):1879-  
19 86 Online First.  
20  
21  
22 167. Liu XX, Xu BM, Chen H, et al. limited sampling strategy for the estimation of  
23 tacrolimus area under the concentration-time curve in Chinese adult liver transplant  
24 patients. *Pharmacology* 2016;98(5-6):229-41 doi: 10.1159/000445896published  
25 Online First.  
26  
27  
28  
29 168. Liu Y, Liu YY, Li CP, et al. Comprehensive comparison of three different  
30 immunosuppressive regimens for liver transplant patients with hepatocellular  
31 carcinoma: Steroid-free immunosuppression, induction immunosuppression and  
32 standard immunosuppression. *PLoS One* 2015;10 (3) Online First.  
33  
34  
35  
36 169. Liu Y, Sun LY, Zhu ZJ, et al. Measles virus infection in pediatric liver transplantation  
37 recipients. *Transplant Proc* 2015;47(9):2715-8 Online First.  
38  
39  
40 170. Liu Z, Yu X, Ren W, et al. CD152 and PD-1 down-regulation on CD8 T cells is  
41 associated with human acute liver allograft rejection. *Transplant Proc*  
42 2014;46(10):3511-4 Online First.  
43  
44  
45 171. Liu ZN, Wang WT, Yan LN. De Novo malignancies after liver transplantation with  
46 14 cases at a single center. *Transplant Proc* 2015;47(8):2483-87 doi:  
47 10.1016/j.transproceed.2015.08.008published Online First.  
48  
49  
50 172. Lu D, Xu X, Wang J, et al. The influence of a contemporaneous portal and hepatic  
51 artery revascularization protocol on biliary complications after liver transplantation.  
52 *Surgery (United States)* 2014;155(1):190-95 doi:  
53 10.1016/j.surg.2013.06.056published Online First.  
54  
55  
56  
57  
58  
59

- 1  
2  
3 173. Lu H, He J, Wu Z, et al. Assessment of microbiome variation during the perioperative  
4 period in liver transplant patients: a retrospective analysis. *Microb Ecol*  
5 2013;65(3):781-91 doi: 10.1007/s00248-013-0211-6published Online First.  
6  
7  
8 174. Lu HW, Dong JH, Li CH, et al. The defects of cholangiocyte primary cilia in patients  
9 with graft cholangiopathies. *Clin Transplant* 2014;28(10):1202-08 Online First.  
10  
11 175. Lu NN, Huang Q, Wang JF, et al. Non-anastomotic biliary strictures following  
12 orthotopic liver transplantation: Treatment with percutaneous transhepatic biliary  
13 drainage. *Hepatogastroenterology* 2012;59(120):2569-72 doi:  
14 10.5754/hge12300published Online First.  
15  
16  
17 176. Lu Q, Zhong XF, Huang ZX, et al. Role of contrast-enhanced ultrasound in decision  
18 support for diagnosis and treatment of hepatic artery thrombosis after liver  
19 transplantation. *Eur J Radiol* 2012;81(3):e338-e43 doi:  
20 10.1016/j.ejrad.2011.11.015published Online First.  
21  
22  
23 177. Lu SC, Jiang T, Lai W, et al. Reestablishment of active immunity against HBV graft  
24 reinfection after liver transplantation for HBV-related end stage liver disease. *Journal*  
25 *of immunology research* 2014;2014:764234 Online First.  
26  
27  
28 178. Luo A, Wan Q, Ye Q, et al. The clinical manifestations and distribution and  
29 resistance of pathogens among liver transplantation with infections caused by non -  
30 Fermenters: A clinical analysis of 31 patients. *Hepatogastroenterology*  
31 2014;61(136):2349-52 doi: 10.5754/hge14849published Online First.  
32  
33  
34 179. Luo A, Zhong Z, Wan Q, et al. The distribution and resistance of pathogens among  
35 solid organ transplant recipients with *Pseudomonas aeruginosa* infections. *Med Sci*  
36 *Monit* 2016;22:1124-30 doi: 10.12659/MSM.896026published Online First.  
37  
38  
39 180. Luo XJ, Wang W, Hu SS, et al. Extracorporeal membrane oxygenation for treatment  
40 of cardiac failure in adult patients. *Interact Cardiovasc Thorac Surg* 2009;9(2):296-  
41 300 Online First.  
42  
43  
44 181. Luo YL, Yang XL, Cui JB, et al. Health-related quality of life of liver transplant  
45 recipients: A single center experience. *Hepatogastroenterology* 2012;59(118):1947-50  
46 doi: 10.5754/hge12008published Online First.  
47  
48  
49 182. Lv Z, Cai X, Weng X, et al. Tumor-stroma ratio is a prognostic factor for survival in  
50 hepatocellular carcinoma patients after liver resection or transplantation. *Surgery*  
51  
52  
53  
54  
55  
56  
57  
58  
59  
60



- 1  
2  
3 (United States) 2015;158(1):142-50 doi: 10.1016/j.surg.2015.02.013published Online  
4 First.  
5  
6  
7 183. Lv Z, Weng X, Du C, et al. Downregulation of HDAC6 promotes angiogenesis in  
8 hepatocellular carcinoma cells and predicts poor prognosis in liver transplantation  
9 patients. *Mol Carcinog* 2016;55(5):1024-33 doi: 10.1002/mc.22345published Online  
10 First.  
11  
12  
13 184. Lyu SQ, Ren J, Zheng RQ, et al. Contrast-enhanced sonography for diagnosing  
14 collateral transformation of the hepatic artery after liver transplantation. *J Ultrasound*  
15 *Med* 2015;34(9):1591-98 doi: 10.7863/ultra.15.14.08079published Online First.  
16  
17  
18 185. Mao W, Chen J, Zheng M, et al. Initial experience of lung transplantation at a single  
19 center in China. *Transplant Proc* 2013;45(1):349-55 doi:  
20 10.1016/j.transproceed.2012.02.045published Online First.  
21  
22  
23 186. Mao W, Hu Y, Lou Y, et al. Immature platelet fraction values predict recovery of  
24 platelet counts following liver transplantation. *Clinics and Research in Hepatology*  
25 *and Gastroenterology* 2015;39(4):469-74 doi: 10.1016/j.clinre.2014.11.008published  
26 Online First.  
27  
28  
29 187. Mao WJ, Chen JY, Zheng MF, et al. Lung transplantation for end-stage silicosis. *J*  
30 *Occup Environ Med* 2011;53(8):845-49 doi:  
31 10.1097/JOM.0b013e3182260e50published Online First.  
32  
33  
34 188. Men TY, Wang JN, Li H, et al. Prevalence of multidrug-resistant gram-negative  
35 bacilli producing extended-spectrum  $\beta$ -lactamases (ESBLs) and ESBL genes in solid  
36 organ transplant recipients. *Transpl Infect Dis* 2013;15(1):14-21 doi:  
37 10.1111/tid.12001published Online First.  
38  
39  
40 189. Meng X, Chen X, Wu L, et al. The hyperlipidemia caused by overuse of  
41 glucocorticoid after liver transplantation and the immune adjustment strategy. *Journal*  
42 *of Immunology Research* 2017;2017 Online First.  
43  
44  
45 190. Minmin S, Zhidong G, Hao C, et al. Correlation between pharmacokinetics and  
46 pharmacodynamics of mycophenolic acid in liver transplant patients. *J Clin*  
47 *Pharmacol* 2010;50(12):1388-96 doi: 10.1177/0091270009359526published Online  
48 First.  
49  
50  
51  
52  
53  
54  
55  
56  
57  
58  
59

- 1  
2  
3 191. Mu HJ, Xie P, Chen JY, et al. Association of TNF- $\alpha$ , TGF- $\beta$ 1, IL-10, IL-6, and IFN- $\gamma$   
4 gene polymorphism with acute rejection and infection in lung transplant recipients.  
5 Clin Transplant 2014;28(9):1016-24 doi: 10.1111/ctr.12411published Online First.  
6  
7  
8 192. Niu Y, Chen X, Feng L, et al. Anti-HBc-positive/HBsAg-negative liver donors pose a  
9 higher risk of occult HBV infection but do not cause severe histological damage in  
10 liver grafts. Clinics and Research in Hepatology and Gastroenterology  
11 2014;38(4):475-80 Online First.  
12  
13  
14  
15 193. Niu YJ, Shen ZY, Xu C, et al. Establishment of tacrolimus-induced diabetes in rat  
16 model and assessment of clinical treatments for post-transplant diabetes mellitus in  
17 liver transplant recipients. Clinical Laboratory 2013;59(7-8):869-74 doi:  
18 10.7754/Clin.Lab.2012.120913published Online First.  
19  
20  
21  
22 194. Pan C, Shi Y, Zhang JJ, et al. Single-center experience of 253 portal vein thrombosis  
23 patients undergoing liver transplantation in China. Transplant Proc 2009;41(9):3761-  
24 65 doi: 10.1016/j.transproceed.2009.06.215published Online First.  
25  
26  
27  
28 195. Pan C, Wang C, Pan W, et al. Usefulness of real-time three-dimensional  
29 echocardiography to quantify global left ventricular function and mechanical  
30 dyssynchrony after heart transplantation. Acta Cardiol 2011;66(3):365-70 doi:  
31 10.2143/AC.66.3.2114137published Online First.  
32  
33  
34 196. Pan L, Zhang W, Zhang J, et al. The analysis of CD45 isoforms expression on HBV-  
35 specific T cells after liver transplantation. Med Oncol 2012;29(2):899-908 doi:  
36 10.1007/s12032-011-9833-zpublished Online First.  
37  
38  
39 197. Pei F, Shang K, Jiang B, et al. Clinicopathologic study on complications of orthotopic  
40 liver transplantation in 54 patients with chronic hepatitis B viral infection.  
41 Hepatology International 2013;7(2):468-76 doi: 10.1007/s12072-013-9422-  
42 7published Online First.  
43  
44  
45  
46 198. Peng C, Zhang Z, Wu J, et al. A critical role for ZDHHC2 in metastasis and  
47 recurrence in human hepatocellular carcinoma. BioMed Research International  
48 2014;2014 Online First.  
49  
50  
51 199. Qiao B, Wu J, Wan Q, et al. Factors influencing mortality in abdominal solid organ  
52 transplant recipients with multidrug-resistant gram-negative bacteremia. BMC Infect  
53 Dis 2017;17 (1) Online First.  
54  
55  
56  
57  
58  
59  
60

- 1  
2  
3 200. Qin J, Fang Y, Dong Y, et al. Radiological and clinical findings of 25 patients with  
4 invasive pulmonary aspergillosis: Retrospective analysis of 2150 liver transplantation  
5 cases. *Br J Radiol* 2012;85(1016):e429-e35 doi: 10.1259/bjr/39784231published  
6 Online First.  
7  
8  
9  
10 201. Qin J, Xu J, Dong Y, et al. High-resolution CT findings of pulmonary infections after  
11 orthotopic liver transplantation in 453 patients. *Br J Radiol* 2012;85(1019):e959-e65  
12 doi: 10.1259/bjr/26230943published Online First.  
13  
14  
15 202. Qin Z, Linghu EQ. New endoscopic classification system for biliary stricture after  
16 liver transplantation. *J Int Med Res* 2014;42(2):566-71 doi:  
17 10.1177/0300060513507761published Online First.  
18  
19  
20 203. Qiu Y, Zhu X, Wang W, et al. Nutrition support with glutamine dipeptide in patients  
21 undergoing liver transplantation. *Transplant Proc* 2009;41(10):4232-37 doi:  
22 10.1016/j.transproceed.2009.08.076published Online First.  
23  
24  
25 204. Qu W, Zhu ZJ, Sun LY, et al. Correlation between immunosuppressive therapy and  
26 CD4<sup>+</sup> T-Cell intracellular adenosine triphosphate levels in liver  
27 transplant recipients. *Transplant Proc* 2016;48(6):2094-97 Online First.  
28  
29  
30 205. Qu W, Zhu ZJ, Sun LY, et al. Correlation between survival interval and  
31 CD4<sup>+</sup> T-Cell intracellular ATP levels in liver transplant recipients.  
32 *Transplant Proc* 2017;49(2):316-21 Online First.  
33  
34  
35 206. Qu W, Zhu ZJ, Sun LY, et al. Salvage liver transplantation for hepatocellular  
36 carcinoma recurrence after primary liver resection. *Clinics and Research in*  
37 *Hepatology and Gastroenterology* 2015;39(1):93-97 doi:  
38 10.1016/j.clinre.2014.07.006published Online First.  
39  
40  
41 207. Ran JH, Zhang SN, Liu J, et al. In-hospital and follow-up outcomes of patients  
42 undergoing orthotopic liver transplantation after hepatic artery reconstruction with an  
43 iliac interposition graft. *Int J Clin Exp Med* 2016;9(2):3939-45 Online First.  
44  
45  
46 208. Ren J, Lu MD, Zheng RQ, et al. Evaluation of the microcirculatory disturbance of  
47 biliary ischemia after liver transplantation with contrast-enhanced ultrasound:  
48 Preliminary experience. *Liver Transpl* 2009;15(12):1703-08 doi:  
49 10.1002/lt.21910published Online First.  
50  
51  
52  
53  
54  
55  
56  
57  
58  
59

- 1  
2  
3  
4  
5  
6  
7  
8  
9  
10  
11  
12  
13  
14  
15  
16  
17  
18  
19  
20  
21  
22  
23  
24  
25  
26  
27  
28  
29  
30  
31  
32  
33  
34  
35  
36  
37  
38  
39  
40  
41  
42  
43  
44  
45  
46  
47  
48  
49  
50  
51  
52  
53  
54  
55  
56  
57  
58  
59  
60
209. Ren J, Zheng BW, Wang P, et al. Revealing impaired blood supply to the bile ducts on contrast-enhanced ultrasound: a novel diagnosis method to ischemic-type biliary lesions after orthotopic liver transplantation. *Ultrasound Med Biol* 2013;39(5):753-60 doi: 10.1016/j.ultrasmedbio.2012.12.004published Online First.
210. Ren L, Teng M, Zhang T, et al. Donors FMO3 polymorphisms affect tacrolimus elimination in Chinese liver transplant patients. *Pharmacogenomics* 2017;18(3):265-75 Online First.
211. Ren QQ, Fu SJ, Zhao Q, et al. Prognostic value of preoperative peripheral monocyte count in patients with hepatocellular carcinoma after liver transplantation. *Tumor Biology* 2016;37(7):8973-78 Online First.
212. Ren X, Guan J, Gao N, et al. Evaluation of pediatric liver transplantation-related artery complications using intra-operative multi-parameter ultrasonography. *Med Sci Monit* 2016;22:4495-502 Online First.
213. Ren X, Luo Y, Gao N, et al. Common ultrasound and contrast-enhanced ultrasonography in the diagnosis of hepatic artery pseudoaneurysm after liver transplantation. *Exp Ther Med* 2016;12(2):1029-33 Online First.
214. Sha J, Tao Y, Li D, et al. Outcome of heart transplantations done in our centre. *Ann Transplant* 2008;13(3):27-29 Online First.
215. Shan Y, Shen N, Han L, et al. MicroRNA-499 Rs3746444 polymorphism and biliary atresia. *Dig Liver Dis* 2016;48(4):423-28 Online First.
216. Shaoyin D, Yongmei Y, Tong S, et al. Follow-up examination of 12 heart transplant recipients with cardiac CT. *Clin Imaging* 2012;36(6):732-38 doi: 10.1016/j.clinimag.2012.02.004published Online First.
217. Shen C, Peng C, Shen B, et al. Sirolimus and metformin synergistically inhibit hepatocellular carcinoma cell proliferation and improve long-term survival in patients with HCC related to hepatitis B virus induced cirrhosis after liver transplantation. *Oncotarget* 2016;7(38):62647-56 Online First.
218. Shen JY, Li C, Wen TF, et al. Liver transplantation versus surgical resection for CC meeting the Milan criteria: A propensity score analysis. *Medicine (United States)* 2016;95(52) doi: 10.1097/MD.00000000000005756published Online First.

- 1  
2  
3 219. Shen Z, Zhu Z, Zhang Y, et al. Liver transplantation at Tianjin First Central Hospital.  
4 Clin Transpl 2005;221-23 Online First.  
5  
6 220. Shen ZY, Zheng WP, Deng YL, et al. Variations in the S and P regions of the  
7 hepatitis B virus genome under immunosuppression in vitro and in vivo. Viral  
8 Immunol 2012;25(5):368-78 Online First.  
9  
10 221. Sheng H, Lu Y, Chen H. Ocular complications of heart transplantation in a Chinese  
11 population. Transplant Proc 2008;40(10):3590-93 doi:  
12 10.1016/j.transproceed.2008.06.081published Online First.  
13  
14 222. Sheng L, Jun S, Jianfeng L, et al. The effect of sirolimus-based immunosuppression  
15 vs. conventional prophylaxis therapy on cytomegalovirus infection after liver  
16 transplantation. Clin Transplant 2015;29(6):555-59 doi: 10.1111/ctr.12552published  
17 Online First.  
18  
19 223. Shi F, Zhang JY, Zeng Z, et al. Skewed ratios between CD3<sup>+</sup> T cells  
20 and monocytes are associated with poor prognosis in patients with HBV-related  
21 acute-on-chronic liver failure. Biochem Biophys Res Commun 2010;402(1):30-36  
22 Online First.  
23  
24 224. Shi R, Shen ZY, Teng da H, et al. Gallstones in liver transplant recipients: A single-  
25 center study in China. Turkish Journal of Gastroenterology 2015;26(5):429-34 Online  
26 First.  
27  
28 225. Shi SH, Kong HS, Jia CK, et al. Risk factors for pneumonia caused by multidrug-  
29 resistant Gram-negative bacilli among liver recipients. Clin Transplant  
30 2010;24(6):758-65 Online First.  
31  
32 226. Shi SH, Kong HS, Xu J, et al. Multidrug resistant gram-negative bacilli as  
33 predominant bacteremic pathogens in liver transplant recipients. Transpl Infect Dis  
34 2009;11(5):405-12 doi: 10.1111/j.1399-3062.2009.00421.xpublished Online First.  
35  
36 227. Shi Y, Li Y, Tang J, et al. Influence of CYP3A4, CYP3A5 and MDR-1  
37 polymorphisms on tacrolimus pharmacokinetics and early renal dysfunction in liver  
38 transplant recipients. Gene 2013;512(2):226-31 doi:  
39 10.1016/j.gene.2012.10.048published Online First.  
40  
41  
42  
43  
44  
45  
46  
47  
48  
49  
50  
51  
52  
53  
54  
55  
56  
57  
58  
59  
60

- 1  
2  
3 228. Shi Z, Yan L, Zhao J, et al. Prevention and treatment of rethrombosis after liver  
4 transplantation with an implantable pump of the portal vein. *Liver Transpl*  
5 2010;16(3):324-31 doi: 10.1002/lt.21988published Online First.  
6  
7  
8 229. Song SH, Li XX, Wan QQ, et al. Risk factors for mortality in liver transplant  
9 recipients with ESKAPE infection. *Transplant Proc* 2014;46(10):3560-63 doi:  
10 10.1016/j.transproceed.2014.08.049published Online First.  
11  
12  
13 230. Su H, Liu Z, Sun Y, et al. Efficacy and safety of low accelerating dose regimen of  
14 interferon/ribavirin antiviral therapy in patients with hepatitis C virus recurrence after  
15 liver transplantation. *Ann Transplant* 2015;20:263-68 doi:  
16 10.12659/AOT.892255published Online First.  
17  
18  
19 231. Su H, Ye Q, Wan Q, et al. Predictors of mortality in abdominal organ transplant  
20 recipients with pseudomonas aeruginosa infections. *Ann Transplant* 2016;21 Online  
21 First.  
22  
23  
24 232. Sun B, Li XY, Gao JW, et al. Population pharmacokinetic study of cyclosporine  
25 based on NONMEM in Chinese liver transplant recipients. *Ther Drug Monit*  
26 2010;32(6):715-22 doi: 10.1097/FTD.0b013e3181fb6ce3published Online First.  
27  
28  
29 233. Sun H, Teng M, Liu J, et al. FOXM1 expression predicts the prognosis in  
30 hepatocellular carcinoma patients after orthotopic liver transplantation combined with  
31 the Milan criteria. *Cancer Lett* 2011;306(2):214-22 doi:  
32 10.1016/j.canlet.2011.03.009published Online First.  
33  
34  
35 234. Sun J, Cao G, Zhang L, et al. Human cytomegalovirus (CMV) UL97 D605E mutation  
36 has a higher prevalence in infants with primary CMV infection compared with  
37 transplant recipients with CMV recurrence. *Transplant Proc* 2012;44(10):3022-25 doi:  
38 10.1016/j.transproceed.2012.06.069published Online First.  
39  
40  
41 235. Sun XY, Dong JH, Qin K, et al. Single center study on transplantation of livers  
42 donated after cardiac death: A report of 6 cases. *Exp Ther Med* 2016;11(3):988-92  
43 doi: 10.3892/etm.2016.3001published Online First.  
44  
45  
46 236. Sun Y, Yin S, Xie H, et al. Immunophenotypic shift of memory CD8 T cells  
47 identifies the changes of immune status in the patients after liver transplantation.  
48 *Scand J Clin Lab Invest* 2009;69(7):789-96 doi:  
49 10.3109/00365510903268818published Online First.  
50  
51  
52  
53  
54  
55  
56  
57  
58  
59  
60

- 1  
2  
3 237. Teng da H, Zhu ZJ, Zheng H, et al. Effect of steatosis donor liver transplantation on  
4 hepatocellular carcinoma recurrence: experience at a single institution.  
5 Hepatogastroenterology 2012;59(115):858-62 Online First.  
6  
7  
8 238. Teng F, Han QC, Ding GS, et al. Validation of a criteria-specific long-term survival  
9 prediction model for hepatocellular carcinoma patients after liver transplantation. Sci  
10 Rep 2015;5:11733 Online First.  
11  
12  
13 239. Tu Z, Xiang P, Xu X, et al. DCD liver transplant infection: Experience from a single  
14 centre in China. Int J Clin Pract 2016;70:3-10 doi: 10.1111/ijcp.12810published  
15 Online First.  
16  
17  
18 240. Vitale A, Cucchetti A, Qiao GL, et al. Is resectable hepatocellular carcinoma a  
19 contraindication to liver transplantation? A novel decision model based on "number  
20 of patients needed to transplant" as measure of transplant benefit. J Hepatol  
21 2014;60(6):1165-71 doi: 10.1016/j.jhep.2014.01.022published Online First.  
22  
23  
24 241. Wan P, Xia Q, Zhang JJ, et al. Liver transplantation for hepatocellular carcinoma  
25 exceeding the Milan criteria: A single-center experience. J Cancer Res Clin Oncol  
26 2014;140(2):341-48 doi: 10.1007/s00432-013-1576-0published Online First.  
27  
28  
29 242. Wan P, Zhang J, Long X, et al. Serum levels of preoperative  $\alpha$ -fetoprotein and CA19-  
30 9 predict survival of hepatic carcinoma patients after liver transplantation. Eur J  
31 Gastroenterol Hepatol 2014;26(5):553-61 doi:  
32 10.1097/MEG.000000000000070published Online First.  
33  
34  
35 243. Wan Q, Ye Q, Su T, et al. The epidemiology and distribution of pathogens and risk  
36 factors for mortality in liver transplant recipients with gram negative bacteremia.  
37 Hepatogastroenterology 2014;61(134):1730-33 doi: 10.5754/hge14504published  
38 Online First.  
39  
40  
41 244. Wan QQ, Ye QF, Ming YZ, et al. The risk factors for mortality in deceased donor  
42 liver transplant recipients with bloodstream infections. Transplant Proc  
43 2013;45(1):305-07 doi: 10.1016/j.transproceed.2012.06.080published Online First.  
44  
45  
46 245. Wang B, He HK, Cheng B, et al. Effect of low central venous pressure on  
47 postoperative pulmonary complications in patients undergoing liver transplantation.  
48 Surg Today 2013;43(7):777-81 doi: 10.1007/s00595-012-0419-ypublished Online  
49 First.  
50  
51  
52  
53  
54  
55  
56  
57  
58  
59  
60

- 1  
2  
3 246. Wang C, Wang G, Yi H, et al. Symptom experienced three years after liver  
4 transplantation under immunosuppression in adults.[Erratum appears in PLoS One.  
5 2013;8(12). doi:10.1371/annotation/161a6145-d670-408a-a9fc-a1107b57724a]. PLoS  
6 ONE [Electronic Resource] 2013;8(11):e80584 Online First.  
7  
8  
9  
10 247. Wang CM, Li X, Song S, et al. Newly designed y-configured single-catheter stenting  
11 for the treatment of hilar-type nonanastomotic biliary strictures after orthotopic liver  
12 transplantation. *Cardiovasc Intervent Radiol* 2012;35(1):184-89 doi: 10.1007/s00270-  
13 011-0214-y published Online First.  
14  
15  
16  
17 248. Wang E, Nie Y, Zhao Q, et al. Circulating miRNAs reflect early myocardial injury  
18 and recovery after heart transplantation. *J Cardiothorac Surg* 2013;8(1) doi:  
19 10.1186/1749-8090-8-165 published Online First.  
20  
21  
22 249. Wang G, Yang J, Li M, et al. Liver transplant may improve erectile function in  
23 patients with benign end-stage liver disease: Single-center Chinese experience. *Exp*  
24 *Clin Transplant* 2013;11(4):332-38 doi: 10.6002/ect.2012.0102 published Online First.  
25  
26  
27 250. Wang GY, Jiang N, Yi HM, et al. Pretransplant elevated plasma fibrinogen level is a  
28 novel prognostic predictor for hepatocellular carcinoma recurrence and patient  
29 survival following liver transplantation. *Ann Transplant* 2016;21:125-30 doi:  
30 10.12659/AOT.895416 published Online First.  
31  
32  
33  
34 251. Wang GY, Li H, Liu W, et al. Elevated blood eosinophil count is a valuable  
35 biomarker for predicting late acute cellular rejection after liver transplantation.  
36 *Transplant Proc* 2013;45(3):1198-200 Online First.  
37  
38  
39 252. Wang GY, Yang Y, Li H, et al. A scoring model based on neutrophil to lymphocyte  
40 ratio predicts recurrence of HBV-associated hepatocellular carcinoma after liver  
41 transplantation. *PLoS One* 2011;6(9) doi: 10.1371/journal.pone.0025295 published  
42 Online First.  
43  
44  
45  
46 253. Wang J, Liu JJ, Liang YY, et al. Could diffusion-weighted imaging detect injured bile  
47 ducts of ischemic-type biliary lesions after orthotopic liver transplantation? *American*  
48 *Journal of Roentgenology* 2012;199(4):901-06 doi: 10.2214/AJR.11.8147 published  
49 Online First.  
50  
51  
52  
53  
54  
55  
56  
57  
58  
59  
60



- 1  
2  
3 254. Wang J, Yang W, Huang Q, et al. Interventional treatment for portal venous  
4 occlusion after liver transplantation: Long-term follow-up results. *Medicine (United*  
5 *States)* 2015;94(4) doi: 10.1097/MD.0000000000000356published Online First.  
6  
7  
8 255. Wang JF, Zhai RY, Wei BJ, et al. Percutaneous intravascular stents for treatment of  
9 portal venous stenosis after liver transplantation: midterm results. *Transplant Proc*  
10 2006;38(5):1461-62 doi: 10.1016/j.transproceed.2006.02.113published Online First.  
11  
12  
13 256. Wang K, Zhu ZJ, Zheng H, et al. Protective hepatitis B surface antibodies in blood  
14 and ascites fluid in the early stage after liver transplantation for hepatitis B diseases.  
15 *Hepatology Research* 2012;42(3):280-87 doi: 10.1111/j.1872-  
16 034X.2011.00926.xpublished Online First.  
17  
18  
19  
20 257. Wang L, Li N, Wang MX, et al. Benefits of minimizing immunosuppressive dosage  
21 according to cytochrome P450 3A5 genotype in liver transplant patients: Findings  
22 from a single-center study. *Genetics and Molecular Research* 2015;14(2):3191-99 doi:  
23 10.4238/2015.April.10.31published Online First.  
24  
25  
26  
27 258. Wang L, Zang Y, Lu S, et al. Efficacy of sirolimus on ischemic-type biliary lesions  
28 after liver transplantation. *Int J Clin Exp Med* 2017;10(1):1151-55 Online First.  
29  
30  
31 259. Wang LJ, Liu ZR, Zhang YM, et al. Clinical analysis of liver transplantation for  
32 benign liver tumor. *Int J Clin Exp Med* 2016;9(11):22691-95 Online First.  
33  
34  
35 260. Wang P, Li H, Shi B, et al. Prognostic factors in patients with recurrent hepatocellular  
36 carcinoma treated with salvage liver transplantation: A singlecenter study. *Oncotarget*  
37 2016;7(23):35071-83 Online First.  
38  
39  
40 261. Wang P, Song W, Li H, et al. Association between donor and recipient smoothed  
41 gene polymorphisms and the risk of hepatocellular carcinoma recurrence following  
42 orthotopic liver transplantation in a Han Chinese population. *Tumor Biology*  
43 2015;36(10):7807-15 doi: 10.1007/s13277-015-3370-xpublished Online First.  
44  
45  
46 262. Wang P, Wang C, Li H, et al. Impact of age on the prognosis after liver  
47 transplantation for patients with hepatocellular carcinoma: A single-center experience.  
48 *Onco Targets Ther* 2015;8:3775-81 doi: 10.2147/OTT.S93939published Online First.  
49  
50  
51 263. Wang PL, Wang J, Zhou Y, et al. Expression of programmed death-1 and its ligands  
52 in the liver of biliary atresia. *World J Pediatr* 2017:1-7 Online First.  
53  
54  
55  
56  
57  
58  
59

- 1  
2  
3 264. Wang S, Li J, Xie A, et al. Dynamic changes in Th1, Th17, and FoxP3+ T cells in  
4 patients with acute cellular rejection after cardiac transplantation. *Clin Transplant*  
5 2011;25(2):E177-E86 doi: 10.1111/j.1399-0012.2010.01362.xpublished Online First.  
6  
7  
8 265. Wang SY, Tang HM, Chen GQ, et al. Effect of ursodeoxycholic acid administration  
9 after liver transplantation on serum liver tests and biliary complications: A  
10 randomized clinical trial. *Digestion* 2012;86(3):208-17 doi:  
11 10.1159/000339711published Online First.  
12  
13  
14  
15 266. Wang W, Ye Y, Wang T, et al. Prognostic prediction of male recipients selected for  
16 liver transplantation: With special attention to neutrophil to lymphocyte ratio.  
17 *Hepatology Research* 2016;46(9):899-907 doi: 10.1111/hepr.12633published Online  
18 First.  
19  
20  
21  
22 267. Wang WL, Jin J, Zheng SS, et al. Tacrolimus dose requirement in relation to donor  
23 and recipient ABCB1 and CYP3A5 gene polymorphisms in Chinese liver transplant  
24 patients. *Liver Transpl* 2006;12(5):775-80 doi: 10.1002/lt.20709published Online  
25 First.  
26  
27  
28  
29 268. Wang Y, Liu Y, Han R, et al. Hemostatic variation during perioperative period of  
30 orthotopic liver transplantation without venovenous bypass. *Thromb Res*  
31 2008;122(2):161-66 doi: 10.1016/j.thromres.2007.10.002published Online First.  
32  
33  
34 269. Wang Y, Liu Y, Han R, et al. Monitoring of CD95 and CD38 expression in peripheral  
35 blood T lymphocytes during active human cytomegalovirus infection after orthotopic  
36 liver transplantation. *Journal of Gastroenterology and Hepatology (Australia)*  
37 2010;25(1):138-42 doi: 10.1111/j.1440-1746.2009.05966.xpublished Online First.  
38  
39  
40  
41 270. Wang Y, Liu Y, Han R, et al. Temporal evolution of soluble Fas and Fas ligand in  
42 patients with orthotopic liver transplantation. *Cytokine* 2008;41(3):240-43 doi:  
43 10.1016/j.cyto.2007.11.010published Online First.  
44  
45  
46 271. Wang Y, Liu Y, Zhang Y, et al. The role of the CD95, CD38 and TGF $\beta$ 1 during  
47 active human cytomegalovirus infection in liver transplantation. *Cytokine* 2006;35(3-  
48 4):193-99 doi: 10.1016/j.cyto.2006.08.001published Online First.  
49  
50  
51 272. Wang Y, Shen Z, Zhu Z, et al. Clinical values of AFP, GPC3 mRNA in peripheral  
52 blood for prediction of hepatocellular carcinoma recurrence following OLT. *Hepatitis*  
53 *Monthly* 2011;11(3):195-99 Online First.  
54  
55  
56  
57  
58  
59  
60

- 1  
2  
3 273. Wang Y, Zhang M, Liu ZW, et al. The ratio of circulating regulatory T cells  
4 (Tregs)/Th17 cells is associated with acute allograft rejection in liver transplantation.  
5 PLoS One 2014;9(11) doi: 10.1371/journal.pone.0112135published Online First.  
6  
7  
8 274. Wang YI, Li G, Zhang Y, et al. The expression of von Willebrand factor, soluble  
9 thrombomodulin, and soluble p-selectin during orthotopic liver transplantation.  
10 Transplant Proc 2007;39(1):172-75 doi:  
11 10.1016/j.transproceed.2006.10.027published Online First.  
12  
13  
14  
15 275. Wang YL, Li G, Wu D, et al. Analysis of alpha-fetoprotein mRNA level on the tumor  
16 cell hematogenous spread of patients with hepatocellular carcinoma undergoing  
17 orthotopic liver transplantation. Transplant Proc 2007;39(1):166-68 doi:  
18 10.1016/j.transproceed.2006.10.008published Online First.  
19  
20  
21  
22 276. Wang YL, Tang ZQ, Gao W, et al. Influence of Th1, Th2, and Th3 cytokines during  
23 the early phase after liver transplantation. Transplant Proc 2003;35(8):3024-25 doi:  
24 10.1016/j.transproceed.2003.10.007published Online First.  
25  
26  
27  
28 277. Wang YL, Zhang YY, Zhou YL, et al. T-helper and T-cytotoxic cell subsets  
29 monitoring during active cytomegalovirus infection in liver transplantation.  
30 Transplant Proc 2004;36(5):1498-99 doi:  
31 10.1016/j.transproceed.2004.05.032published Online First.  
32  
33  
34 278. Wang Z, Gong W, Shou D, et al. Clonal origin of hepatocellular carcinoma and  
35 recurrence after liver transplantation. Ann Transplant 2016;21:484-90 Online First.  
36  
37  
38 279. Wang Z, He JJ, Liu XY, et al. The evaluation of enteric-coated mycophenolate  
39 sodium in cardiac deceased donor liver transplant patients in China.  
40 Immunopharmacol Immunotoxicol 2015;37(6):508-12 doi:  
41 10.3109/08923973.2015.1096286published Online First.  
42  
43  
44 280. Wang Z, Liao J, Wu S, et al. Recipient C6 rs9200 genotype is associated with  
45 hepatocellular carcinoma recurrence after orthotopic liver transplantation in a Han  
46 Chinese population. Cancer Gene Ther 2016;23(6):157-61 doi:  
47 10.1038/cgt.2016.7published Online First.  
48  
49  
50  
51 281. Wang Z, Shi B, Jin H, et al. Low-dose of tacrolimus favors the induction of  
52 functional CD4+CD25+FoxP3+ regulatory T cells in solid-organ transplantation. Int  
53  
54  
55  
56  
57  
58  
59

- 1  
2  
3 Immunopharmacol 2009;9(5):564-69 doi: 10.1016/j.intimp.2009.01.029published  
4 Online First.  
5  
6  
7 282. Wang Z, Wu S, Chen D, et al. Influence of TLR4 rs1927907 locus polymorphisms on  
8 tacrolimus pharmacokinetics in the early stage after liver transplantation. *Eur J Clin*  
9 *Pharmacol* 2014;70(8):925-31 doi: 10.1007/s00228-014-1673-2published Online First.  
10  
11 283. Wang ZX, Fu ZR, Ding GS, et al. Prevention of hepatitis B virus reinfection after  
12 orthotopic liver transplantation. *Transplant Proc* 2004;36(8):2315-7 Online First.  
13  
14 284. Wang ZX, Song SH, Teng F, et al. A single-center retrospective analysis of liver  
15 transplantation on 255 patients with hepatocellular carcinoma. *Clin Transplant*  
16 2010;24(6):752-57 doi: 10.1111/j.1399-0012.2009.01172.xpublished Online First.  
17  
18 285. Wang ZX, Yan LN, Wang WT, et al. Impact of pretransplant MELD score on  
19 posttransplant outcome in orthotopic liver transplantation for patients with acute-on-  
20 chronic hepatitis b liver failure. *Transplant Proc* 2007;39(5):1501-04 doi:  
21 10.1016/j.transproceed.2007.02.070published Online First.  
22  
23 286. Wei Q, Xu X, Wang C, et al. Efficacy and safety of a steroid-free immunosuppressive  
24 regimen after liver transplantation for hepatocellular carcinoma. *Gut and Liver*  
25 2016;10(4):604-10 doi: 10.5009/gnl15017published Online First.  
26  
27 287. Wei Y, Zhang L, Lin H, et al. Factors related to post-liver transplantation acute renal  
28 failure. *Transplant Proc* 2006;38(9):2982-84 doi:  
29 10.1016/j.transproceed.2006.08.156published Online First.  
30  
31 288. Wei YJ, Huang YX, Zhang XL, et al. Apolipoprotein D as a novel marker in human  
32 end-stage heart failure: A preliminary study. *Biomarkers* 2008;13(5):535-48 Online  
33 First.  
34  
35 289. Wei-lin W, Jing J, Shu-sen Z, et al. Tacrolimus dose requirement in relation to donor  
36 and recipient ABCB1 and CYP3A5 gene polymorphisms in Chinese liver transplant  
37 patients. *Liver Transpl* 2006;12(5):775-80 Online First.  
38  
39 290. Wen O, Li X, Wan Q, et al. The risk factors for mortality and septic shock in liver  
40 transplant recipients with ESKAPE bacteremia. *Hepatology*  
41 2015;62(138):246-49 doi: 10.5754/hge14092published Online First.  
42  
43 291. Wu B, Wu H, Chen J, et al. Comparative proteomic analysis of human donor tissues  
44 during orthotopic liver transplantation: Ischemia versus reperfusion. *Hepatology*  
45  
46  
47  
48  
49  
50  
51  
52  
53  
54  
55  
56  
57  
58  
59  
60

- 1  
2  
3 International 2013;7(1):286-98 doi: 10.1007/s12072-012-9346-7published Online  
4 First.  
5  
6  
7 292. Wu CZ, Ni XJ, Zheng SL, et al. A fast SSP-PCR method for genotyping the ATP-  
8 binding cassette subfamily B member 1 gene C3435T and G2677T polymorphisms in  
9 Chinese transplant recipients. *Tumori* 2009;95(3):338-42 Online First.  
10  
11 293. Wu D, Shen ZY, Zhang YM, et al. Effect of liver transplantation in combined  
12 hepatocellular and cholangiocellular carcinoma: A case series. *BMC Cancer* 2015;15  
13 (1) Online First.  
14  
15 294. Wu J, Xu X, Liang T, et al. Long-term outcome of combined liver-kidney  
16 transplantation: A single-center experience in China. *Hepatogastroenterology*  
17 2008;55(82-83):334-37 Online First.  
18  
19 295. Wu J, Zhu SM, He HL, et al. Plasma propofol concentrations during orthotopic liver  
20 transplantation. *Acta Anaesthesiol Scand* 2005;49(6):804-10 doi: 10.1111/j.1399-  
21 6576.2005.00671.xpublished Online First.  
22  
23 296. Wu L, Chen L, Zhou L, et al. Association of interleukin 18 gene promoter  
24 polymorphisms with HBV recurrence after liver transplantation in Han Chinese  
25 population. *Hepatitis Monthly* 2011;11(6):469-74 Online First.  
26  
27 297. Wu L, Hu A, Tam N, et al. Salvage liver transplantation for patients with recurrent  
28 hepatocellular carcinoma after curative resection. *PLoS One* 2012;7(7) doi:  
29 10.1371/journal.pone.0041820published Online First.  
30  
31 298. Wu L, Tam N, Deng R, et al. Steroid-resistant acute rejection after cadaveric liver  
32 transplantation: Experience from one single center. *Clinics and Research in*  
33 *Hepatology and Gastroenterology* 2014;38(5):592-97 doi:  
34 10.1016/j.clinre.2014.04.005published Online First.  
35  
36 299. Wu L, Xu X, Shen J, et al. MDR1 gene polymorphisms and risk of recurrence in  
37 patients with hepatocellular carcinoma after liver transplantation. *J Surg Oncol*  
38 2007;96(1):62-68 doi: 10.1002/jso.20774published Online First.  
39  
40 300. Wu L, Zhang J, Guo Z, et al. Diagnosis and treatment of acute appendicitis after  
41 orthotopic liver transplant in adults. *Exp Clin Transplant* 2011;9(2):113-17 Online  
42 First.  
43  
44  
45  
46  
47  
48  
49  
50  
51  
52  
53  
54  
55  
56  
57  
58  
59  
60

- 1  
2  
3 301. Wu L, Zhang J, Guo Z, et al. Hepatic artery thrombosis after orthotopic liver  
4 transplant: A review of the same institute 5 years later. *Exp Clin Transplant*  
5 2011;9(3):191-96 Online First.  
6  
7  
8 302. Wu LM, Xie HY, Zhou L, et al. A single nucleotide polymorphism in the vascular  
9 endothelial growth factor gene is associated with recurrence of hepatocellular  
10 carcinoma after transplantation. *Arch Med Res* 2009;40(7):565-70 doi:  
11 10.1016/j.arcmed.2009.07.011 published Online First.  
12  
13  
14 303. Wu LM, Yang Z, Zhou L, et al. Identification of histone deacetylase 3 as a biomarker  
15 for tumor recurrence following liver transplantation in HBV-associated hepatocellular  
16 carcinoma. *PLoS One* 2010;5(12) doi: 10.1371/journal.pone.0014460 published  
17 Online First.  
18  
19  
20 304. Wu LM, Zhang F, Xie HY, et al. MMP2 promoter polymorphism (C-1306T) and risk  
21 of recurrence in patients with hepatocellular carcinoma after transplantation. *Clin*  
22 *Genet* 2008;73(3):273-78 doi: 10.1111/j.1399-0004.2007.00955.x published Online  
23 First.  
24  
25  
26 305. Wu LM, Zhang F, Zhou L, et al. Predictive value of CpG island methylator  
27 phenotype for tumor recurrence in hepatitis B virus-associated hepatocellular  
28 carcinoma following liver transplantation. *BMC Cancer* 2010;10 doi: 10.1186/1471-  
29 2407-10-399 published Online First.  
30  
31  
32 306. Wu Y, Cai B, Tang J, et al. Tacrolimus may induce the production of nucleolar anti-  
33 nuclear antibody in liver transplant patients. *J Gastrointest Liver Dis*  
34 2011;20(3):267-70 Online First.  
35  
36  
37 307. Wu ZW, Lu HF, Wu J, et al. Assessment of the fecal lactobacilli population in  
38 patients with hepatitis b virus-related decompensated cirrhosis and hepatitis b  
39 cirrhosis treated with liver transplant. *Microb Ecol* 2012;63(4):929-37 doi:  
40 10.1007/s00248-011-9945-1 published Online First.  
41  
42  
43 308. Xia D, Yan LN, Li B, et al. Orthotopic liver transplantation for incurable alveolar  
44 echinococcosis: Report of five cases from west China. *Transplant Proc*  
45 2005;37(5):2181-84 doi: 10.1016/j.transproceed.2005.03.111 published Online First.  
46  
47  
48  
49  
50  
51  
52  
53  
54  
55  
56  
57  
58  
59  
60

- 1  
2  
3 309. Xia D, Yan LN, Xu L, et al. Postoperative Severe Pneumonia in Adult Liver  
4 Transplant Recipients. *Transplant Proc* 2006;38(9):2974-78 doi:  
5 10.1016/j.transproceed.2006.08.184published Online First.  
6  
7  
8 310. Xia W, Ke Q, Guo H, et al. Expansion of the Milan criteria without any sacrifice:  
9 Combination of the Hangzhou criteria with the pre-transplant platelet-to-lymphocyte  
10 ratio. *BMC Cancer* 2017;17 (1) Online First.  
11  
12 311. Xia W, Ke Q, Wang Y, et al. Donation after cardiac death liver transplantation: Graft  
13 quality evaluation based on pretransplant liver biopsy. *Liver Transpl* 2015;21(6):838-  
14 46 doi: 10.1002/lt.24123published Online First.  
15  
16 312. Xia W, Ke Q, Wang Y, et al. Predictive value of pre-transplant platelet to lymphocyte  
17 ratio for hepatocellular carcinoma recurrence after liver transplantation. *World J Surg*  
18 *Oncol* 2015;13(1) doi: 10.1186/s12957-015-0472-2published Online First.  
19  
20 313. Xia ZW, Jun CY, Hao C, et al. The occurrence of diarrhea not related to the  
21 pharmacokinetics of MPA and its metabolites in liver transplant patients. *Eur J Clin*  
22 *Pharmacol* 2010;66(7):671-79 doi: 10.1007/s00228-010-0833-2published Online First.  
23  
24 314. Xiao H, Tong R, Cheng S, et al. BAG3 and HIF-1 alpha coexpression detected by  
25 immunohistochemistry correlated with prognosis in hepatocellular carcinoma after  
26 liver transplantation. *BioMed Research International* 2014;2014 Online First.  
27  
28 315. Xiao L, Fu ZR, Ding GS, et al. Liver transplantation for Hepatitis B virus-related  
29 hepatocellular carcinoma: one center's experience in China. *Transplant Proc*  
30 2009;41(5):1717-21 doi: 10.1016/j.transproceed.2009.03.058published Online First.  
31  
32 316. Xiao L, Fu ZR, Ding GS, et al. Prediction of survival after liver transplantation for  
33 chronic severe hepatitis b based on preoperative prognostic scores: A single center's  
34 experience in China. *World J Surg* 2009;33(11):2420-26 doi: 10.1007/s00268-009-  
35 0183-3published Online First.  
36  
37 317. Xiao M, Xu X, Zhu H, et al. Efficacy and safety of basiliximab in liver  
38 transplantation for patients with hepatitis B virus-related diseases: A single centre  
39 study. *Int J Clin Pract* 2015;69(S183):35-42 doi: 10.1111/ijcp.12665published Online  
40 First.  
41  
42 318. Xie BX, Zhu YM, Chen C, et al. Outcome of TiNi stent treatments in symptomatic  
43 central airway stenoses caused by *Aspergillus fumigatus* infections after lung  
44  
45  
46  
47  
48  
49  
50  
51  
52  
53  
54  
55  
56  
57  
58  
59  
60

- transplantation. *Transplant Proc* 2013;45(6):2366-70 doi: 10.1016/j.transproceed.2013.02.129 published Online First.
319. Xie HY, Wang WL, Yao MY, et al. Polymorphisms in cytokine genes and their association with acute rejection and recurrence of Hepatitis B in Chinese liver transplant recipients. *Arch Med Res* 2008;39(4):420-28 doi: 10.1016/j.arcmed.2008.01.003 published Online First.
320. Xie M, Rao W, Sun LY, et al. Tacrolimus-related seizure after pediatric liver transplantation - A single-center experience. *Pediatr Transplant* 2014;18(1):58-63 doi: 10.1111/ptr.12198 published Online First.
321. Xie M, Rao W, Yang T, et al. Occult hepatitis B virus infection predicts de novo hepatitis B infection in patients with alcoholic cirrhosis after liver transplantation. *Liver International* 2015;35(3):897-904 doi: 10.1111/liv.12567 published Online First.
322. Xie SB, Zhu JY, Ying Z, et al. Prevention and risk factors of the HBV recurrence after orthotopic liver transplantation: 160 cases follow-up study. *Transplantation* 2010;90(7):786-90 doi: 10.1097/TP.0b013e3181f09c89 published Online First.
323. Xing T, Huang L, Yu Z, et al. Comparison of Steroid-Free Immunosuppression and Standard Immunosuppression for Liver Transplant Patients with Hepatocellular Carcinoma. *PLoS One* 2013;8(8) doi: 10.1371/journal.pone.0071251 published Online First.
324. Xing T, Qiu G, Zhong L, et al. Calcitriol reduces the occurrence of acute cellular rejection of liver transplants: A prospective controlled study. *Pharmazie* 2013;68(10):821-26 doi: 10.1691/ph.2013.3561 published Online First.
325. Xing T, Zhong L, Chen D, et al. Experience of combined liver-kidney transplantation for acute-on-chronic liver failure patients with renal dysfunction. *Transplant Proc* 2013;45(6):2307-13 doi: 10.1016/j.transproceed.2013.02.127 published Online First.
326. Xing T, Zhong L, Chen D, et al. Experience of combined liver-kidney transplantation for acute-on-chronic liver failure patients with renal dysfunction.[Erratum appears in *Transplant Proc.* 2013 Sep;45(7):2859]. *Transplant Proc* 2013;45(6):2307-13 Online First.



- 1  
2  
3 327. Xing T, Zhong L, Lin L, et al. Immunity of fungal infections alleviated graft reject in  
4 liver transplantation compared with non-fungus recipients. *Int J Clin Exp Pathol*  
5 2015;8(3):2603-14 Online First.  
6  
7  
8 328. Xing T, Zhong L, Qiu G, et al. Evolution of CD4<sup>+</sup>CD25<sup>hi</sup> T cell subsets in  
9 Aspergillus-infected liver transplantation recipients reduces the incidence of  
10 transplantation rejection via upregulating the production of anti-inflammatory  
11 cytokines. *Genetics and Molecular Research* 2014;13(3):4932-39 doi:  
12 10.4238/2014.July.4.7published Online First.  
13  
14 329. Xing T, Zhong L, Qiu G, et al. Evolution of CD4<sup>+</sup>CD25<sup>hi</sup>  
15 T cell subsets in Aspergillus-infected liver transplantation recipients reduces the  
16 incidence of transplantation rejection via upregulating the production of anti-  
17 inflammatory cytokines. *Genetics and Molecular Research* 2014;13(3):4932-39  
18 Online First.  
19  
20 330. Xu G, Li LL, Sun ZT, et al. Effects of dexmedetomidine on postoperative cognitive  
21 dysfunction and serum levels of  $\beta$ -amyloid and neuronal microtubule-associated  
22 protein in orthotopic liver transplantation patients. *Ann Transplant* 2016;21:508-15  
23 doi: 10.12659/AOT.899340published Online First.  
24  
25 331. Xu H, Li W, Xu Z, et al. Evaluation of the right ventricular ejection fraction during  
26 classic orthotopic liver transplantation without venovenous bypass. *Clin Transplant*  
27 2012;26(5):E485-E91 doi: 10.1111/ctr.12010published Online First.  
28  
29 332. Xu J, Shen ZY, Chen XG, et al. A randomized controlled trial of licartin for  
30 preventing hepatoma recurrence after liver transplantation. *Hepatology*  
31 2007;45(2):269-76 doi: 10.1002/hep.21465published Online First.  
32  
33 333. Xu L, Li X, Xu M, et al. Perioperative use of ECMO during double lung  
34 transplantation. *ASAIO J* 2009;55(3):255-58 doi:  
35 10.1097/MAT.0b013e3181a05795published Online First.  
36  
37 334. Xu L, Xu MQ, Yan LN, et al. Causes of mortality after liver transplantation: A single  
38 center experience in mainland China. *Hepatogastroenterology* 2012;59(114):481-84  
39 doi: 10.5754/hge11419published Online First.  
40  
41 335. Xu SL, Zhang YC, Wang GY, et al. Survival analysis of sirolimus-based  
42 immunosuppression in liver transplantation in patients with hepatocellular carcinoma.  
43  
44  
45  
46  
47  
48  
49  
50  
51  
52  
53  
54  
55  
56  
57  
58  
59  
60

- 1  
2  
3 Clinics and Research in Hepatology and Gastroenterology 2016;40(6):674-81 Online  
4 First.  
5  
6  
7 336. Xu X, Guo HJ, Xie HY, et al. ZIP4, a novel determinant of tumor invasion in  
8 hepatocellular carcinoma, contributes to tumor recurrence after liver transplantation.  
9 Int J Biol Sci 2014;10(3):245-56 doi: 10.7150/ijbs.7401published Online First.  
10  
11 337. Xu X, Ke QH, Shao ZX, et al. The value of serum  $\alpha$ -fetoprotein in predicting tumor  
12 recurrence after liver transplantation for hepatocellular carcinoma. Dig Dis Sci  
13 2009;54(2):385-88 doi: 10.1007/s10620-008-0349-0published Online First.  
14  
15 338. Xu X, Ling Q, Gao F, et al. Hepatoprotective effects of marine and kuhuang in liver  
16 transplant recipients. Am J Chin Med 2009;37(1):27-34 Online First.  
17  
18 339. Xu X, Ling Q, Wang J, et al. Donor miR-196a-2 polymorphism is associated with  
19 hepatocellular carcinoma recurrence after liver transplantation in a Han Chinese  
20 population. Int J Cancer 2016;138(3):620-29 Online First.  
21  
22 340. Xu X, Ling Q, Wu J, et al. A novel prognostic model based on serum levels of total  
23 bilirubin and creatinine early after liver transplantation. Liver International  
24 2007;27(6):816-24 doi: 10.1111/j.1478-3231.2007.01494.xpublished Online First.  
25  
26 341. Xu X, Ling Q, Zhang M, et al. Outcome of patients with hepatorenal syndrome type 1  
27 after liver transplantation: Hangzhou experience. Transplantation 2009;87(10):1514-  
28 19 doi: 10.1097/TP.0b013e3181a4430bpublished Online First.  
29  
30 342. Xu X, Liu X, Ling Q, et al. Artificial liver support system combined with liver  
31 transplantation in the treatment of patients with acute-on-chronic liver failure. PLoS  
32 One 2013;8(3) doi: 10.1371/journal.pone.0058738published Online First.  
33  
34 343. Xu X, Qu K, Wan Y, et al. Tumor existence and tumor size as prognostic factors in  
35 hepatitis B virus-related cirrhosis patients who underwent liver transplantation.  
36 Transplant Proc 2014;46(5):1389-92 doi:  
37 10.1016/j.transproceed.2014.01.011published Online First.  
38  
39 344. Xu X, Tu Z, Wang B, et al. A novel model for evaluating the risk of hepatitis B  
40 recurrence after liver transplantation. Liver International 2011;31(10):1477-84 doi:  
41 10.1111/j.1478-3231.2011.02500.xpublished Online First.  
42  
43  
44  
45  
46  
47  
48  
49  
50  
51  
52  
53  
54  
55  
56  
57  
58  
59  
60

- 1  
2  
3 345. Xu ZD, Xu HT, Li WW, et al. Influence of preoperative diastolic dysfunction on  
4 hemodynamics and outcomes of patients undergoing orthotopic liver transplantation.  
5 Int J Clin Exp Med 2013;6(5):351-57 Online First.  
6  
7  
8 346. Xue F, Higgs BW, Huang J, et al. HERC5 is a prognostic biomarker for post-liver  
9 transplant recurrent human hepatocellular carcinoma. J Transl Med 2015;13(1) doi:  
10 10.1186/s12967-015-0743-2published Online First.  
11  
12  
13 347. Xue F, Zhang J, Han L, et al. Immune cell functional assay in monitoring of adult  
14 liver transplantation recipients with infection. Transplantation 2010;89(5):620-26 doi:  
15 10.1097/TP.0b013e3181c690fapublished Online First.  
16  
17  
18 348. Xue J, Wang L, Chen CM, et al. Acute kidney injury influences mortality in lung  
19 transplantation. Ren Fail 2014;36(4):541-45 doi:  
20 10.3109/0886022X.2013.876350published Online First.  
21  
22  
23 349. Xue M, Lv C, Chen X, et al. Donor liver steatosis: A risk factor for early new-onset  
24 diabetes after liver transplantation. Journal of Diabetes Investigation 2017;8(2):181-  
25 87 doi: 10.1111/jdi.12560published Online First.  
26  
27  
28 350. Xue M, Lv C, Chen X, et al. Effect of interleukin-2 receptor antagonists on new-onset  
29 diabetes after liver transplantation: A retrospective cohort study. Journal of Diabetes  
30 2015 Online First.  
31  
32  
33 351. Yambe T, Meng X, Hou X, et al. Cardio-ankle vascular index (CAVI) for the  
34 monitoring of the atherosclerosis after heart transplantation. Biomed Pharmacother  
35 2005;59(SUPPL. 1):S177-S79 doi: 10.1016/S0753-3322(05)80028-9published  
36 Online First.  
37  
38  
39 352. Yan L, Li B, Wen T, et al. Prophylaxis against hepatitis B recurrence  
40 posttransplantation using lamivudine and individualized low-dose hepatitis B  
41 immunoglobulin. Am J Transplant 2010;10(8):1861-69 Online First.  
42  
43  
44 353. Yan S, Tu Z, Lu W, et al. Clinical utility of an automated pupillometer for assessing  
45 and monitoring recipients of liver transplantation. Liver Transpl 2009;15(12):1718-27  
46 doi: 10.1002/lt.21924published Online First.  
47  
48  
49 354. Yang CH, He XS, Chen J, et al. Fungal infection in patients after liver transplantation  
50 in years 2003 to 2012. Ann Transplant 2012;17(4):59-63 doi:  
51 10.12659/AOT.883695published Online First.  
52  
53  
54  
55  
56  
57  
58  
59  
60

- 1  
2  
3 355. Yang J, Zhu L, Zhang Y, et al. PPK analysis of tacrolimus early after Chinese  
4 pediatric and adult liver transplantation with different CYP3A5 genotypes. *Latin*  
5 *American Journal of Pharmacy* 2017;36(2):238-46 Online First.  
6  
7  
8 356. Yang JW, Liao SS, Zhu LQ, et al. Population pharmacokinetic analysis of tacrolimus  
9 early after Chinese pediatric liver transplantation. *Int J Clin Pharmacol Ther*  
10 2015;53(1):75-83 doi: 10.5414/CP202189published Online First.  
11  
12  
13 357. Yang X, Lu Q, Tang T, et al. Prediction of the prognosis after liver transplantation in  
14 severe hepatitis B-induced liver failure and clinical decision for liver transplantation.  
15 *J Surg Res* 2013;183(2):846-51 doi: 10.1016/j.jss.2013.01.034published Online First.  
16  
17  
18 358. Yang YJ, Chen DZ, Li LX, et al. Sirolimus-based immunosuppressive therapy in liver  
19 transplant recipient with tacrolimus-related chronic renal insufficiency. *Transplant*  
20 *Proc* 2008;40(5):1541-44 doi: 10.1016/j.transproceed.2008.01.081published Online  
21 First.  
22  
23  
24  
25 359. Yang YL, Shi LJ, Lin MJ, et al. Clinical analysis and significance of cholangiography  
26 for biliary cast/stone after orthotopic liver transplantation. *Journal of Nanoscience*  
27 *and Nanotechnology* 2013;13(1):171-77 doi: 10.1166/jnn.2013.6790published Online  
28 First.  
29  
30  
31  
32 360. Yang Z, Zhou L, Wu LM, et al. Combination of polymorphisms within the HDAC1  
33 and HDAC3 gene predict tumor recurrence in hepatocellular carcinoma patients that  
34 have undergone transplant therapy. *Clin Chem Lab Med* 2010;48(12):1785-91 doi:  
35 10.1515/CCLM.2010.353published Online First.  
36  
37  
38  
39 361. Yang Z, Zhou L, Wu LM, et al. Overexpression of long non-coding RNA HOTAIR  
40 predicts tumor recurrence in hepatocellular carcinoma patients following liver  
41 transplantation. *Ann Surg Oncol* 2011;18(5):1243-50 doi: 10.1245/s10434-011-1581-  
42 ypublished Online First.  
43  
44  
45  
46 362. Yao J, Feng XW, Yu XB, et al. Recipient IL-6-572c/G genotype is associated with  
47 reduced incidence of acute rejection following liver transplantation. *J Int Med Res*  
48 2013;41(2):356-64 doi: 10.1177/0300060513477264published Online First.  
49  
50  
51 363. Ye D, Li H, Wang Y, et al. Circulating Fibroblast Growth Factor 21 Is A Sensitive  
52 Biomarker for Severe Ischemia/reperfusion Injury in Patients with Liver  
53 Transplantation. *Sci Rep* 2016;6:19776 Online First.  
54  
55  
56  
57  
58  
59  
60

- 1  
2  
3 364. Yi H, An Y, Lv H, et al. The association of lipopolysaccharide and inflammatory  
4 factors with hepatopulmonary syndrome and their changes after orthotopic liver  
5 transplantation. *J Thorac Dis* 2014;6(10):1469-75 doi: 10.3978/j.issn.2072-  
6 1439.2014.10.05published Online First.  
7  
8  
9  
10 365. Yu D, Liu J, Chen J, et al. GGPPS1 predicts the biological character of hepatocellular  
11 carcinoma in patients with cirrhosis. *BMC Cancer* 2014;14 (1) Online First.  
12  
13 366. Yu S, Gao F, Yu J, et al. De novo cancers following liver transplantation: A single  
14 center experience in China. *PLoS One* 2014;9 (1) Online First.  
15  
16 367. Yu S, He X, Yang L, et al. A retrospective study of conversion from tacrolimus-based  
17 to sirolimus-based immunosuppression in orthotopic liver transplant recipients. *Exp*  
18 *Clin Transplant* 2008;6(2):113-17 Online First.  
19  
20 368. Yu S, Wu L, Jin J, et al. Influence of CYP3A5 gene polymorphisms of donor rather  
21 than recipient to tacrolimus individual dose requirement in liver transplantation.  
22 *Transplantation* 2006;81(1):46-51 doi: 10.1097/01.tp.0000188118.34633.bfpublished  
23 Online First.  
24  
25 369. Yu S, Yu J, Zhang W, et al. Safe use of liver grafts from hepatitis B surface antigen  
26 positive donors in liver transplantation. *J Hepatol* 2014;61(4):809-15 Online First.  
27  
28 370. Yu X, Liu Z, Wang Y, et al. Characteristics of gammadelta1 and gammadelta 2 T cell  
29 subsets in acute liver allograft rejection. *Transpl Immunol* 2013;29(1-4):118-22  
30 Online First.  
31  
32 371. Yu X, Wei B, Dai Y, et al. Genetic polymorphism of Interferon Regulatory Factor 5  
33 (IRF5) correlates with allograft acute rejection of liver transplantation. *PLoS One*  
34 2014;9(4) doi: 10.1371/journal.pone.0094426published Online First.  
35  
36 372. Yu X, Xie H, Wei B, et al. Association of MDR1 gene SNPs and haplotypes with the  
37 tacrolimus dose requirements in Han Chinese liver transplant recipients. *PLoS One*  
38 2011;6(11) doi: 10.1371/journal.pone.0025933published Online First.  
39  
40 373. Yu Z, Sun Z, Yu S, et al. Safety limitations of fatty liver transplantation can be  
41 extended to 40%: Experience of a single centre in China. *Liver International* 2016  
42 Online First.  
43  
44  
45  
46  
47  
48  
49  
50  
51  
52  
53  
54  
55  
56  
57  
58  
59  
60

- 1  
2  
3 374. Yuan D, Wei YG, Lin HM, et al. Risk factors of biliary complications following liver  
4 transplantation: Retrospective analysis of a single centre. *Postgrad Med J*  
5 2009;85(1001):119-23 doi: 10.1136/pgmj.2008.075176published Online First.  
6  
7  
8 375. Yuan X, Chen C, Zhou J, et al. Organ donation and transplantation from donors with  
9 systemic infection: a single-center experience. *Transplant Proc* 2016;48(7):2454-57  
10 Online First.  
11  
12  
13 376. Yuefeng M, Weili F, Wenxiang T, et al. Long-term outcome of patients with  
14 lamivudine after early cessation of hepatitis B immunoglobulin for prevention of  
15 recurrent hepatitis B following liver transplantation. *Clin Transplant* 2011;25(4):517-  
16 22 Online First.  
17  
18  
19  
20 377. Zeng Z, Jiang Z, Wang CS, et al. Preoperative evaluation improves the outcome in  
21 heart transplant recipients with pulmonary hypertension-retrospective analysis of 106  
22 cases. *Transplant Proc* 2010;42(9):3708-10 doi:  
23 10.1016/j.transproceed.2010.08.067published Online First.  
24  
25  
26  
27 378. Zhai H, Liang P, Yu XL, et al. Microwave ablation in treating intrahepatic recurrence  
28 of hepatocellular carcinoma after liver transplantation: An analysis of 11 cases. *Int J*  
29 *Hyperthermia* 2015;31(8):863-68 doi: 10.3109/02656736.2015.1091953published  
30 Online First.  
31  
32  
33  
34 379. Zhang A, Zhang M, Shen Y, et al. Hepatitis B virus reactivation is a risk factor for  
35 development of post-transplant lymphoproliferative disease after liver transplantation.  
36 *Clin Transplant* 2009;23(5):756-60 doi: 10.1111/j.1399-0012.2009.01049.xpublished  
37 Online First.  
38  
39  
40  
41 380. Zhang C, Rao J, Tu Z, et al. Surgical resection of resectable thoracic metastatic  
42 hepatocellular carcinoma after liver transplantation. *J Thorac Cardiovasc Surg*  
43 2009;138(1):240-41 doi: 10.1016/j.jtcvs.2008.05.014published Online First.  
44  
45  
46 381. Zhang D, Jiao Z, Han J, et al. Clinicopathological features of hepatitis B virus  
47 recurrence after liver transplantation: Eleven-year experience. *Int J Clin Exp Pathol*  
48 2014;7(7):4057-66 Online First.  
49  
50  
51 382. Zhang F, Wu LM, Zhou L, et al. Predictive value of expression and promoter  
52 hypermethylation of XAF1 in hepatitis B virus-associated hepatocellular carcinoma  
53  
54  
55  
56  
57  
58  
59

- 1  
2  
3 treated with transplantation. *Ann Surg Oncol* 2008;15(12):3494-502 doi:  
4 10.1245/s10434-008-0146-1published Online First.  
5  
6  
7 383. Zhang FJ, Li CX, Liang Z, et al. Short- to mid-term evaluation of CT-guided 125I  
8 brachytherapy on intra-hepatic recurrent tumors and/or extra-hepatic metastases after  
9 liver transplantation for hepatocellular carcinoma. *Cancer Biology and Therapy*  
10 2009;8(7):585-90 Online First.  
11  
12  
13 384. Zhang G, Cheng Y, Shen W, et al. The short-term effect of liver transplantation on  
14 the low-frequency fluctuation of brain activity in cirrhotic patients with and without  
15 overt hepatic encephalopathy. *Brain Imaging and Behavior* 2016:1-13 Online First.  
16  
17  
18 385. Zhang H, Chen L, Gu G, et al. Clinical observation and nursing care on the  
19 prevention of abdominal organ cluster transplantation rejection. *J Clin Nurs*  
20 2013;22(11-12):1599-603 doi: 10.1111/jocn.12079published Online First.  
21  
22  
23 386. Zhang H, Shi Y, Wu H, et al. Change of hepatic arterial systolic/diastolic ratio  
24 predicts ischemic type biliary lesion after orthotopic liver transplantation. *Clin*  
25 *Imaging* 2016;40(3):419-24 Online First.  
26  
27  
28 387. Zhang HM, Jiang WT, Pan C, et al. Milan criteria, University of California, San  
29 Francisco, criteria, and model for end-stage liver disease score as predictors of  
30 salvage liver transplantation. *Transplant Proc* 2015;47(2):438-44 doi:  
31 10.1016/j.transproceed.2014.10.046published Online First.  
32  
33  
34 388. Zhang HM, Li SP, Yu Y, et al. Bi-directional roles of IRF-1 on autophagy diminish  
35 its prognostic value as compared with Ki67 in liver transplantation for hepatocellular  
36 carcinoma. *Oncotarget* 2016;7(25):37979-92 doi: 10.18632/oncotarget.9365published  
37 Online First.  
38  
39  
40 389. Zhang LJ, Yang GF, Jiang B, et al. Cavernous transformation of portal vein: 16-Slice  
41 CT portography and correlation with surgical procedure of orthotopic liver  
42 transplantation. *Abdom Imaging* 2008;33(5):529-35 doi: 10.1007/s00261-007-9343-  
43 9published Online First.  
44  
45  
46 390. Zhang M, Yin F, Chen B, et al. Mortality risk after liver transplantation in  
47 hepatocellular carcinoma recipients: A nonlinear predictive model. *Surgery (United*  
48 *States)* 2012;151(6):889-97 doi: 10.1016/j.surg.2011.12.034published Online First.  
49  
50  
51  
52  
53  
54  
55  
56  
57  
58  
59

- 1  
2  
3 391. Zhang M, Yin F, Chen B, et al. Pretransplant prediction of posttransplant survival for  
4 liver recipients with benign end-stage liver diseases: A nonlinear model. *PLoS One*  
5 2012;7 (3) Online First.  
6  
7  
8 392. Zhang M, Zhong X, Zhang W, et al. Human parvovirus B19 infection induced pure  
9 red cell aplasia in liver transplant recipients. *Int J Clin Pract* 2015;69(S183):29-34 doi:  
10 10.1111/ijcp.12664published Online First.  
11  
12  
13 393. Zhang ML, Xu J, Zhang W, et al. Microbial epidemiology and risk factors of  
14 infections in recipients after DCD liver transplantation. *Int J Clin Pract* 2016;70:17-21  
15 doi: 10.1111/ijcp.12812published Online First.  
16  
17  
18 394. Zhang P, Guo Z, Zhong K, et al. Evaluation of Immune Profiles and MicroRNA  
19 Expression Profiles in Peripheral Blood Mononuclear Cells of Long-Term Stable  
20 Liver Transplant Recipients and Recipients with Acute Rejection Episodes.  
21  
22  
23  
24  
25  
26  
27 395. Zhang Q, Chen H, Li Q, et al. Combination adjuvant chemotherapy with oxaliplatin,  
28 5-fluorouracil and leucovorin after liver transplantation for hepatocellular carcinoma:  
29 A preliminary open-label study. *Invest New Drugs* 2011;29(6):1360-69 doi:  
30 10.1007/s10637-011-9726-1published Online First.  
31  
32  
33  
34 396. Zhang Q, Chen X, Zang Y, et al. The survival benefit of liver transplantation for  
35 hepatocellular carcinoma patients with hepatitis b virus infection and cirrhosis. *PLoS*  
36  
37  
38  
39  
40 397. Zhang Q, Chen X, Zhou J, et al. CD147, MMP-2, MMP-9 and MVD-CD34 are  
41 significant predictors of recurrence after liver transplantation in hepatocellular  
42 carcinoma patients. *Cancer Biol Ther* 2006;5(7):808-14 Online First.  
43  
44  
45 398. Zhang Q, Shang L, Zang Y, et al.  $\alpha$ -Fetoprotein is a potential survival predictor in  
46 hepatocellular carcinoma patients with hepatitis B selected for liver transplantation.  
47  
48  
49  
50  
51 399. Zhang W, Zhong H, Zhuang L, et al. Peripheral blood CD4+ cell ATP activity  
52 measurement to predict HCC recurrence post-DCD liver transplant. *Int J Clin Pract*  
53 2016;70:11-16 doi: 10.1111/ijcp.12811published Online First.  
54  
55  
56  
57  
58  
59  
60



- 1  
2  
3 400. Zhang X, Fan J, Yang MF, et al. Monitoring of human cytomegalovirus infection in  
4 bone marrow and liver transplant recipients by antigenaemia assay and enzyme-  
5 linked immunosorbent assay. *J Int Med Res* 2009;37(1):31-36 Online First.  
6  
7  
8 401. Zhang X, Wang Z, Fan J, et al. Impact of interleukin-10 gene polymorphisms on  
9 tacrolimus dosing requirements in Chinese liver transplant patients during the early  
10 posttransplantation period. *Eur J Clin Pharmacol* 2011;67(8):803-13 doi:  
11 10.1007/s00228-011-0993-8published Online First.  
12  
13  
14 402. Zhang X, Xu J, Fan J, et al. Influence of IL-18 and IL-10 Polymorphisms on  
15 tacrolimus elimination in Chinese lung transplant patients. *Dis Markers* 2017;2017  
16 doi: 10.1155/2017/7834035published Online First.  
17  
18  
19 403. Zhang XD, Cheng Y, Poon CS, et al. Long-and short-range functional connectivity  
20 density alteration in non-alcoholic cirrhotic patients one month after liver  
21 transplantation: A resting-state fMRI study. *Brain Res* 2015;1620:177-87 doi:  
22 10.1016/j.brainres.2015.04.046published Online First.  
23  
24  
25 404. Zhang XF, Lv Y, Xue WJ, et al. Mycobacterium tuberculosis Infection in Solid  
26 Organ Transplant Recipients: Experience From a Single Center in China. *Transplant*  
27 *Proc* 2008;40(5):1382-85 doi: 10.1016/j.transproceed.2008.01.075published Online  
28 First.  
29  
30  
31 405. Zhang XQ, Wang ZW, Fan JW, et al. The impact of sulfonylureas on tacrolimus  
32 apparent clearance revealed by a population pharmacokinetics analysis in Chinese  
33 adult liver-transplant patients. *Ther Drug Monit* 2012;34(2):126-33 doi:  
34 10.1097/FTD.0b013e31824a67ebpublished Online First.  
35  
36  
37 406. Zhang XX, Bian RJ, Wang J, et al. Relationship between cytokine gene  
38 polymorphisms and acute rejection following liver transplantation. *Genetics and*  
39 *Molecular Research* 2016;15 (2) 15027599) Online First.  
40  
41  
42 407. Zhang Y, Wang YL, Liu YW, et al. Change of peripheral blood mononuclear cells  
43 IFN- $\gamma$ , IL-10, and TGF- $\beta$ 1 mRNA expression levels with active human  
44 cytomegalovirus infection in orthotopic liver transplantation. *Transplant Proc*  
45 2009;41(5):1767-69 doi: 10.1016/j.transproceed.2009.03.064published Online First.  
46  
47  
48 408. Zhang Y, Yan L, Wen T, et al. Prophylaxis against hepatitis B virus recurrence after  
49 liver transplantation for hepatitis B virus-related end-stage liver diseases with severe  
50  
51  
52  
53  
54  
55  
56  
57  
58  
59  
60

- hypersplenism and splenomegaly: Role of splenectomy. *J Surg Res* 2012;178(1):478-86 doi: 10.1016/j.jss.2012.02.047published Online First.
409. Zhang YC, Liu W, Fu BS, et al. Therapeutic potentials of umbilical cord-derived mesenchymal stromal cells for ischemic-type biliary lesions following liver transplantation. *Cytotherapy* 2017;19(2):194-99 Online First.
410. Zhang YC, Qu EZ, Ren J, et al. New diagnosis and therapy model for ischemic-type biliary lesions following liver transplantation-a retrospective cohort study. *PLoS One* 2014;9(9) doi: 10.1371/journal.pone.0105795published Online First.
411. Zheng RQ, Mao R, Ren J, et al. Contrast-enhanced ultrasound for the evaluation of hepatic artery stenosis after liver transplantation: Potential role in changing the clinical algorithm. *Liver Transpl* 2010;16(6):729-35 doi: 10.1002/lt.22054published Online First.
412. Zheng S, Chen Y, Liang T, et al. Prevention of hepatitis B recurrence after liver transplantation using lamivudine or lamivudine combined with hepatitis B immunoglobulin prophylaxis. *Liver Transpl* 2006;12(2):253-58 doi: 10.1002/lt.20701published Online First.
413. Zheng SS, Xu X, Wu J, et al. Liver transplantation for hepatocellular carcinoma: Hangzhou experiences. *Transplantation* 2008;85(12):1726-32 doi: 10.1097/TP.0b013e31816b67e4published Online First.
414. Zheng Z, Gao S, Yang Z, et al. Single nucleotide polymorphisms in the metastasis associated in colon cancer-1 gene predict the recurrence of hepatocellular carcinoma after transplantation. *Int J Med Sci* 2014;11(2):142-50 doi: 10.7150/ijms.7142published Online First.
415. Zheng Z, Lin B, Zhang J, et al. Absolute lymphocyte count recovery at 1 month after transplantation predicts favorable outcomes of patients with hepatocellular carcinoma. *Journal of Gastroenterology and Hepatology (Australia)* 2015;30(4):706-11 doi: 10.1111/jgh.12782published Online First.
416. Zhenglu W, Hui L, Shuying Z, et al. A clinical-pathological analysis of drug-induced hepatic injury after liver transplantation. *Transplant Proc* 2007;39(10):3287-91 doi: 10.1016/j.transproceed.2007.08.096published Online First.

- 1  
2  
3 417. Zhong L, Li H, Li Z, et al. C7 genotype of the donor may predict early bacterial  
4 infection after liver transplantation. *Sci Rep* 2016;6:24121 Online First.  
5  
6 418. Zhong L, Men TY, Li H, et al. Multidrug-resistant gram-negative bacterial infections  
7 after liver transplantation - Spectrum and risk factors. *J Infect* 2012;64(3):299-310 doi:  
8 10.1016/j.jinf.2011.12.005published Online First.  
9  
10 419. Zhong X, Zhang W, Xu J, et al. Human parvovirus B19 infection induced pure red  
11 cell aplasia in liver transplant recipients. *Int J Clin Pract* 2015;69(S183):29-34 Online  
12 First.  
13  
14 420. Zhong ZQ, Luo AJ, Wan QQ, et al. Pseudomonas aeruginosa infection among liver  
15 transplant recipients: a clinical analysis of 15 cases. *Transplant Proc*  
16 2016;48(6):2130-34 Online First.  
17  
18 421. Zhongyang S, Yihe L, Lixin Y, et al. An experience from China of perioperative care  
19 in 1510 liver transplant recipients. *Int Anesthesiol Clin* 2006;44(4):121-26 doi:  
20 10.1097/01.aia.0000210820.31029.92published Online First.  
21  
22 422. Zhou B, Shan H, Zhu KS, et al. Chemoembolization with lobaplatin mixed with  
23 iodized oil for unresectable recurrent hepatocellular carcinoma after orthotopic liver  
24 transplantation. *J Vasc Interv Radiol* 2010;21(3):333-38 doi:  
25 10.1016/j.jvir.2009.11.006published Online First.  
26  
27 423. Zhou J, Fan J, Wang JH, et al. Continuous transcatheter arterial thrombolysis for  
28 early hepatic artery thrombosis after liver transplantation. *Transplant Proc*  
29 2005;37(10):4426-29 doi: 10.1016/j.transproceed.2005.10.113published Online First.  
30  
31 424. Zhou J, Huang H, Liu S, et al. Staphylococcus Aureus bacteremias following liver  
32 transplantation: A clinical analysis of 20 cases. *Ther Clin Risk Manag* 2015;11:933-  
33 37 doi: 10.2147/TCRM.S84579published Online First.  
34  
35 425. Zhou J, Ju W, Yuan X, et al. ABO-incompatible liver transplantation for severe  
36 hepatitis B patients. *Transpl Int* 2015;28(7):793-99 doi: 10.1111/tri.12531published  
37 Online First.  
38  
39 426. Zhou J, Wang Z, Qiu SJ, et al. Surgical treatment for early hepatocellular carcinoma:  
40 Comparison of resection and liver transplantation. *J Cancer Res Clin Oncol*  
41 2010;136(9):1453-60 doi: 10.1007/s00432-010-0802-2published Online First.  
42  
43  
44  
45  
46  
47  
48  
49  
50  
51  
52  
53  
54  
55  
56  
57  
58  
59

- 1  
2  
3 427. Zhou J, Wang Z, Wu ZQ, et al. Sirolimus-based immunosuppression therapy in liver  
4 transplantation for patients with hepatocellular carcinoma exceeding the milan criteria.  
5 Transplant Proc 2008;40(10):3548-53 doi:  
6 10.1016/j.transproceed.2008.03.165published Online First.  
7  
8  
9  
10 428. Zhou L, Fan J, Zheng SS, et al. Prevalence of human cytomegalovirus UL97 D605E  
11 mutation in transplant recipients in China. Transplant Proc 2006;38(9):2926-28 doi:  
12 10.1016/j.transproceed.2006.08.161published Online First.  
13  
14  
15 429. Zhou L, Wei B, Xing C, et al. Polymorphism in 3'-untranslated region of toll-like  
16 receptor 4 gene is associated with protection from hepatitis B virus recurrence after  
17 liver transplantation. Transpl Infect Dis 2011;13(3):250-58 doi: 10.1111/j.1399-  
18 3062.2010.00574.xpublished Online First.  
19  
20  
21  
22 430. Zhou L, Zhou W, Wu L, et al. The association of frequent allelic loss on 17p13.1 with  
23 early metastatic recurrence of hepatocellular carcinoma after liver transplantation. J  
24 Surg Oncol 2010;102(7):802-08 doi: 10.1002/jso.21743published Online First.  
25  
26  
27  
28 431. Zhou Q, Wang Y, Zhou X, et al. Prognostic analysis for treatment modalities in  
29 hepatocellular carcinomas with portal vein tumor thrombi. Asian Pac J Cancer Prev  
30 2011;12(11):2847-50 Online First.  
31  
32  
33 432. Zhou ZB, Shao XX, Yang XY, et al. Influence of Hydroxyethyl starch on renal  
34 function after orthotopic liver transplantation. Transplant Proc 2015;47(6):1616-19  
35 doi: 10.1016/j.transproceed.2015.04.095published Online First.  
36  
37  
38 433. Zhu B, Chen Y, Xie Y, et al. Kaposi's sarcoma-associated herpesvirus (KSHV)  
39 infection: Endemic strains and cladograms from immunodeficient patients in China. J  
40 Clin Virol 2008;42(1):7-12 Online First.  
41  
42  
43 434. Zhu L, Wang H, Rao W, et al. A limited sampling strategy for tacrolimus in liver  
44 transplant patients. Int J Clin Pharmacol Ther 2013;51(6):509-12 doi:  
45 10.5414/CP201876published Online First.  
46  
47  
48 435. Zhu L, Yang J, Jing Y, et al. Effects of CYP3A5 genotypes, ABCB1 C3435T and  
49 G2677T/A polymorphism on pharmacokinetics of Tacrolimus in Chinese adult liver  
50 transplant patients. Xenobiotica 2015;45(9):840-46 Online First.  
51  
52  
53  
54  
55  
56  
57  
58  
59  
60

- 1  
2  
3 436. Zhu M, Li Y, Xia Q, et al. Strong impact of acute kidney injury on survival after liver  
4 transplantation. *Transplant Proc* 2010;42(9):3634-38 doi:  
5  
6 10.1016/j.transproceed.2010.08.059published Online First.  
7  
8 437. Zhu Q, Zhou L, Yang Z, et al. O-GlcNAcylation plays a role in tumor recurrence of  
9 hepatocellular carcinoma following liver transplantation. *Med Oncol* 2012;29(2):985-  
10 93 doi: 10.1007/s12032-011-9912-1published Online First.  
11  
12 438. Zhu X, Wu Y, Qiu Y, et al. Effects of  $\omega$ -3 fish oil lipid emulsion combined with  
13 parenteral nutrition on patients undergoing liver transplantation. *Journal of Parenteral*  
14 *and Enteral Nutrition* 2013;37(1):68-74 doi: 10.1177/0148607112440120published  
15 Online First.  
16  
17 439. Zhu XD, Shen ZY, Chen XG, et al. Pathotyping and clinical manifestations of biliary  
18 cast syndrome in patients after an orthotopic liver transplant. *Exp Clin Transplant*  
19 2013;11(2):142-49 doi: 10.6002/ect.2012.0035published Online First.  
20  
21 440. Zhu XS, Gao YH, Wang SS, et al. Contrast-enhanced ultrasound diagnosis of splenic  
22 artery steal syndrome after orthotopic liver transplantation. *Liver Transpl*  
23 2012;18(8):966-71 doi: 10.1002/lt.23453published Online First.  
24  
25 441. Zhu XS, Wang SS, Cheng Q, et al. Using ultrasonography to monitor liver blood flow  
26 for liver transplant from donors supported on extracorporeal membrane oxygenation.  
27 *Liver Transpl* 2016;22(2):188-91 doi: 10.1002/lt.24318published Online First.  
28  
29 442. Zhu ZJ, Shen ZY, Gao W, et al. Feasibility of using a liver infected with *Clonorchis*  
30 *sinensis* for liver transplantation: Fourteen cases. *Liver Transpl* 2010;16(12):1440-42  
31 doi: 10.1002/lt.22147published Online First.  
32  
33 443. Zicheng Y, Weixia Z, Hao C, et al. Limited sampling strategy for the estimation of  
34 mycophenolic acid area under the plasma concentration-time curve in adult patients  
35 undergoing liver transplant. *Ther Drug Monit* 2007;29(2):207-14 doi:  
36 10.1097/FTD.0b013e318040ce0bpublished Online First.  
37  
38 444. Zou SJ, Chen D, Li YZ, et al. Monitoring hepatocyte dysfunction and biliary  
39 complication after liver transplantation using quantitative hepatobiliary scintigraphy.  
40 *Medicine (United States)* 2015;94(45):e2009 doi:  
41 10.1097/MD.0000000000002009published Online First.  
42  
43  
44  
45  
46  
47  
48  
49  
50  
51  
52  
53  
54  
55  
56  
57  
58  
59

- 1  
2  
3 445. Zou Y, Yang X, Jiang X, et al. High levels of soluble Major Histocompatibility  
4 Complex class I related chain A (MICA) are associated with biliary cast syndrome  
5 after liver transplantation. *Transpl Immunol* 2009;21(4):210-14 doi:  
6 10.1016/j.trim.2009.06.003published Online First.  
7  
8  
9  
10  
11  
12  
13  
14  
15  
16  
17  
18  
19  
20  
21  
22  
23  
24  
25  
26  
27  
28  
29  
30  
31  
32  
33  
34  
35  
36  
37  
38  
39  
40  
41  
42  
43  
44  
45  
46  
47  
48  
49  
50  
51  
52  
53  
54  
55  
56  
57  
58  
59  
60

|    | A                                                                                                                                                                                                                                                                                                                                                   | B                                                           | C                | D          | E              | F                | G                | H               | I               | J                                                                                                                                                                                                                                                                                                                    | K                    | L                    | M                |
|----|-----------------------------------------------------------------------------------------------------------------------------------------------------------------------------------------------------------------------------------------------------------------------------------------------------------------------------------------------------|-------------------------------------------------------------|------------------|------------|----------------|------------------|------------------|-----------------|-----------------|----------------------------------------------------------------------------------------------------------------------------------------------------------------------------------------------------------------------------------------------------------------------------------------------------------------------|----------------------|----------------------|------------------|
|    | Reference                                                                                                                                                                                                                                                                                                                                           | Journal title                                               | Publication year | Organ type | Organs from DD | No of Tx from DD | Year of first Tx | Year of last Tx | Ethics approval | Ethics text                                                                                                                                                                                                                                                                                                          | Source identity info | Source identity text | Type of donation |
| 1  | Aidong W, Zhenjie C, Tong L, et al. Therapeutic drug monitoring of tacrolimus in early stage after heart transplantation. <i>Transplant Proc</i> 2004;36(8):2388-9 Online First.                                                                                                                                                                    | Transplantation Proceedings                                 | 2004             | Hearts     | DD             | 23               | 2000             | 2003            | No              |                                                                                                                                                                                                                                                                                                                      | No                   |                      | 0                |
| 2  | Awang DVC, Kong L, Jiang W. Schisandra extract elevates concentration of tacrolimus in blood of liver transplant patients. <i>Focus on Alternative and Complementary Therapies</i> 2010;15(3):236-37 doi: 10.1111/j.2042-7166.2010.01045_9.xpublished Online First.                                                                                 | Focus on Alternative and Complementary Therapies            | 2010             | Livers     | DD             | 32               | 2004             | 2008            | Yes             | This study was approved by the Ethics Committee of The First Affiliated Hospital of Nanjing Medical University, Nanjing, Jiangsu 210029, China. All subjects gave informed consent for this study.                                                                                                                   | No                   |                      | OT               |
| 3  | Bai DS, Dai Z, Zhou J, et al. Capn4 overexpression underlies tumor invasion and metastasis after liver transplantation for hepatocellular carcinoma. <i>Hepatology</i> 2009;49(2):460-70 doi: 10.1002/hep.22638published Online First.                                                                                                              | Hepatology                                                  | 2009             | Livers     |                | 252              | 2001             | 2005            | Yes             | Ethical approval was obtained from the Zhong Shan Hospital Research Ethics Committee                                                                                                                                                                                                                                 | No                   |                      | 0                |
| 4  | Bu X, Zheng Z, Yu Y, et al. Significance of C4d Deposition in the Diagnosis of Rejection After Liver Transplantation. <i>Transplant Proc</i> 2006;38(5):1418-21 doi: 10.1016/j.transproceed.2006.03.018published Online First.                                                                                                                      | Transplantation Proceedings                                 | 2006             | Livers     | DD             | 20               | 2001             | 2004            | No              |                                                                                                                                                                                                                                                                                                                      | No                   |                      | 0                |
| 5  | Cai CJ, Lu MQ, Chen YH, et al. Clinical study on prevention of HBV re-infection by entecavir after liver transplantation. <i>Clin Transplant</i> 2012;26(2):208-15 doi: 10.1111/j.1399-0012.2011.01448.xpublished Online First.                                                                                                                     | Clinical Transplantation                                    | 2012             | Livers     |                | 252              | 2005             | 2007            | No              |                                                                                                                                                                                                                                                                                                                      | No                   |                      | 0                |
| 6  | Cai Q, Li S, Jiang Y, et al. Alleviating graft injury during liver transplantation by improving retrograde perfusion in standard orthotopic liver transplantation. <i>Int J Clin Exp Med</i> 2016;9(2):4364-71 Online First.                                                                                                                        | International Journal of Clinical and Experimental Medicine | 2016             | Livers     | DD             | 42               | 2013             | 2014            | Yes             | This study was conducted in accordance with the declaration of Helsinki. This study was conducted with approval from the Ethics Committee of Fujian Medical University. Written informed consent was obtained from all participants.                                                                                 | No                   |                      | 0                |
| 7  | Cai X, Liu F, Zhu F, et al. Cholangiographic features and endoscopic treatment of biliary strictures. <i>Int J Clin Exp Med</i> 2015;8(2):2586-92 Online First.                                                                                                                                                                                     | International Journal of Clinical and Experimental Medicine | 2015             | Livers     |                | 76               | 2006             | 2009            | Yes             | The study protocol was approved by the Institutional Review Board of the First People's Hospital affiliated to Shanghai Jiaotong University. Standard informed consent was obtained from all patients prior to ERCP procedure.                                                                                       | No                   |                      | 0                |
| 8  | Chen B, Gu Z, Chen H, et al. Establishment of high-performance liquid chromatography and enzyme multiplied immunoassay technology methods for determination of free mycophenolic acid and its application in Chinese liver transplant recipients. <i>Ther Drug Monit</i> 2010;32(5):653-60 doi: 10.1097/FTD.0b013e3181f01397published Online First. | Therapeutic Drug Monitoring                                 | 2010             | Livers     |                | 51               | 0                | 0               | Yes             | The study protocol was approved by the Ruijin Hospital Research Ethics Committee                                                                                                                                                                                                                                     | No                   |                      | 0                |
| 9  | Chen D, Fan J, Guo F, et al. Novel single nucleotide polymorphisms in interleukin 6 affect tacrolimus metabolism in liver transplant patients. <i>PLoS One</i> 2013;8(8) doi: 10.1371/journal.pone.0073405published Online First.                                                                                                                   | PLoS ONE                                                    | 2013             | Livers     |                | 96               | 2007             | 2011            | Yes             | This research was approved by the Ethics Committee of Shanghai Jiao Tong University, and informed written consent was obtained according to the Declaration of Helsinki and its amendments                                                                                                                           | No                   |                      | 0                |
| 10 | Chen D, Guo F, Shi J, et al. Association of hemoglobin levels, CYP3A5, and NR1B3 gene polymorphisms with tacrolimus pharmacokinetics in liver transplant patients. <i>Drug Metab Pharmacokinet</i> 2014;29(3):249-53 doi: 10.2133/dmpk.DMPK-13-RG-095published Online First.                                                                        | Drug Metabolism and Pharmacokinetics                        | 2014             | Livers     |                | 96               | 2007             | 2012            | Yes             | This study was approved by the Ethics Committee of Shanghai Jiao Tong University, and informed written consent was obtained according to the Declaration of Helsinki and its amendments                                                                                                                              | No                   |                      | 0                |
| 11 | Chen D, Liu S, Chen S, et al. Donor interleukin 6 gene polymorphisms predict the recurrence of hepatocellular carcinoma after liver transplantation. <i>Int J Clin Oncol</i> 2016;21(6):1111-19 Online First.                                                                                                                                       | International Journal of Clinical Oncology                  | 2016             | Livers     |                | 110              | 2006/12          | 2013/12         | Yes             | Written informed consent forms were obtained from all donors and recipients. The study was approved by the Ethics Committee of Shanghai Jiao Tong University and was conducted strictly under the guidelines of the Declaration of Helsinki.                                                                         | No                   |                      | 0                |
| 12 | Chen G, Liu H, Hu ZQ, et al. A new scheme with infusion of hepatitis B immunoglobulin combined with entecavir for prophylaxis of hepatitis B virus recurrence among liver transplant recipients. <i>Eur J Gastroenterol Hepatol</i> 2015;27(8):901-06 doi: 10.1097/MEG.000000000000388published Online First.                                       | European Journal of Gastroenterology and Hepatology         | 2015             | Livers     |                | 102              | 2006             | 2010            | Yes             | This study was approved by the local ethics committee of First People's Hospital of Kunming City and Ganmei Hospital affiliated to Kunming Medical University (SKY2015-1). Informed consents were obtained from all the patients. The study was carried out according to the principles of the Helsinki Declaration. | No                   |                      | 0                |
| 13 | Chen GH, Fu BS, Cai CJ, et al. A single-center experience of retransplantation for liver transplant recipients with a failing graft. <i>Transplant Proc</i> 2008;40(5):1485-87 doi: 10.1016/j.transproceed.2008.01.076published Online First.                                                                                                       | Transplantation Proceedings                                 | 2008             | Livers     |                | 31               | 2004             | 2007            | No              |                                                                                                                                                                                                                                                                                                                      | No                   |                      | 0                |
| 14 |                                                                                                                                                                                                                                                                                                                                                     |                                                             |                  |            |                |                  |                  |                 |                 |                                                                                                                                                                                                                                                                                                                      |                      |                      |                  |

|    | A                                                                                                                                                                                                                                                                                                                                         | B                                                        | C    | D      | E  | F   | G       | H       | I   | J                                                                                                                                                                                                                                                                                                                        | K   | L                                                                                                               | M  |
|----|-------------------------------------------------------------------------------------------------------------------------------------------------------------------------------------------------------------------------------------------------------------------------------------------------------------------------------------------|----------------------------------------------------------|------|--------|----|-----|---------|---------|-----|--------------------------------------------------------------------------------------------------------------------------------------------------------------------------------------------------------------------------------------------------------------------------------------------------------------------------|-----|-----------------------------------------------------------------------------------------------------------------|----|
| 15 | Chen GH, Wang GY, Yang Y, et al. Single-center experience of therapeutic management of hepatic artery stenosis after orthotopic liver transplantation: Report of 20 cases. <i>Eur Surg Res</i> 2009;42(1):21-27 doi: 10.1159/000166601published Online First.                                                                             | European Surgical Research                               | 2009 | Livers |    | 20  | 2003    | 2007    | No  |                                                                                                                                                                                                                                                                                                                          | No  |                                                                                                                 | 0  |
| 16 | Chen GH, Yang Y, Lu MQ, et al. Liver transplantation for end-stage alcoholic liver disease: a single-center experience from mainland China. <i>Alcohol</i> 2010;44(3):217-21 doi: 10.1016/j.alcohol.2010.02.010published Online First.                                                                                                    | Alcohol                                                  | 2010 | Livers |    | 268 | 2003    | 2007    | No  |                                                                                                                                                                                                                                                                                                                          | No  |                                                                                                                 | 0  |
| 17 | Chen H, Chen E, Mao A, et al. Validation of limited sampling strategy for the estimation of mycophenolic acid exposure in Chinese adult liver transplant recipients. <i>Liver Transpl</i> 2007;13(12):1684-93 doi: 10.1002/lt.21293published Online First.                                                                                | Liver Transplantation                                    | 2007 | Livers |    | 30  | 0       | 0       | Yes | The study was approved by the independent ethics committee of Ruijin Hospital. The procedure was described in detail to all patients before admission, and informed consent was obtained.                                                                                                                                | No  |                                                                                                                 | 0  |
| 18 | Chen H, Gu Z, Chen B, et al. Models for the prediction of mycophenolic acid area under the curve using a limited-sampling strategy and an enzyme multiplied immunoassay technique in Chinese patients undergoing liver transplantation. <i>Clin Ther</i> 2008;30(12):2387-401 doi: 10.1016/j.clinthera.2008.12.017published Online First. | Clinical Therapeutics                                    | 2008 | Livers |    | 60  | 0       | 0       | Yes | The study protocol was approved by the independent ethics committee of Ruijin Hospital. The study procedures were described in detail to all patients before transplantation, and written informed consent was obtained.                                                                                                 | No  |                                                                                                                 | 0  |
| 19 | Chen H, Miao R, Fan J, et al. Decreased expression of miR-126 correlates with metastatic recurrence of hepatocellular carcinoma. <i>Clin Exp Metastasis</i> 2013;30(5):651-58 Online First.                                                                                                                                               | Clinical and Experimental Metastasis                     | 2013 | Livers |    | 68  | 2002    | 2007    | Yes | All samples were collected with the informed consent of the patients and the study was approved by the Institutional Review Boards of Shanghai Jiao Tong University.                                                                                                                                                     | No  |                                                                                                                 | 0  |
| 20 | Chen H, Peng C, Yu Z, et al. Pharmacokinetics of mycophenolic acid and determination of area under the curve by abbreviated sampling strategy in Chinese liver transplant recipients. <i>Clin Pharmacokinet</i> 2007;46(2):175-85 doi: 10.2165/0003088-200746020-00005published Online First.                                             | Clinical Pharmacokinetics                                | 2007 | Livers |    | 40  | 0       | 0       | Yes | The study design was approved by the independent ethics committee of Ruijin Hospital and the procedure was described in detail to all patients before admission and informed written consent was obtained.                                                                                                               | No  |                                                                                                                 | 0  |
| 21 | Chen HY, Han ZB, Fan JW, et al. miR-203 expression predicts outcome after liver transplantation for hepatocellular carcinoma in cirrhotic liver. <i>Med Oncol</i> 2012;29(3):1859-65 doi: 10.1007/s12032-011-0031-9published Online First.                                                                                                | Medical Oncology                                         | 2012 | Livers | DD | 66  | 2002    | 2007    | Yes | Use of formalin-fixed paraffinembedded tumor tissues and retrospective analysis of patient data were approved by the Institutional Review Boards of Shanghai Jiao Tong University and were conducted in accordance with the Helsinki Declaration.                                                                        | No  |                                                                                                                 | 0  |
| 22 | Chen J, Li Y, Wang L, et al. Association of three SNPs in interleukin-28B with graft hepatic dysfunction after liver transplantation in Chinese Han population. <i>Gene</i> 2012;508(1):121-24 doi: 10.1016/j.gene.2012.07.065published Online First.                                                                                     | Gene                                                     | 2012 | Livers |    | 178 | 2003    | 2010    | Yes | This study was approved by the West China Hospital.                                                                                                                                                                                                                                                                      | No  |                                                                                                                 | 0  |
| 23 | Chen J, Wang Y, Shen Z, et al. Early diagnostic value of plasma PCT and BG assay for CRBSI after OLT. <i>Transplant Proc</i> 2011;43(5):1777-79 Online First.                                                                                                                                                                             | Transplantation Proceedings                              | 2011 | Livers | DD | 55  | 2008    | 2009    | Yes | The present study was approved by our Institutional Ethics Committee. Informed consent was obtained from each patient. All recipients received livers from cadaveric donors. The procedure met all applicable institutional guidelines and Chinese governmental regulations regarding the ethical use of donated organs. | Yes | No prisoners or organs from prisoners were used in this study.                                                  | 0  |
| 24 | Chen J, Zhong L. Clinical significance of serum hepcidin-25 levels in predicting invasive fungal disease in patients after transplantation. <i>Eur Rev Med Pharmacol Sci</i> 2013;17(13):1769-73 Online First.                                                                                                                            | European Review for Medical and Pharmacological Sciences | 2013 | Livers |    | 18  | 2009/10 | 2010/1  | No  |                                                                                                                                                                                                                                                                                                                          | No  |                                                                                                                 | 0  |
| 25 | Chen P, Wang W, Yan L, et al. Risk factors for first-year hospital readmission after liver transplantation. <i>Eur J Gastroenterol Hepatol</i> 2015;27(5):600-06 doi: 10.1097/MEG.00000000000003272015published Online First.                                                                                                             | European Journal of Gastroenterology and Hepatology      | 2015 | Livers | DD | 791 | 1999    | 2013    | Yes | This study was approved by the Ethics Committee of West China Hospital of Sichuan University and carried out in accordance with ethical principles of the Declaration of Helsinki                                                                                                                                        | No  |                                                                                                                 | OT |
| 26 | Chen X, Meng X, Xu Y, et al. Cytokine and human leukocyte antigen (HLA) profile for graft-versus-host disease (GVHD) after organ transplantation. <i>Eur J Med Res</i> 2016;21(1):1-6 Online First.                                                                                                                                       | European Journal of Medical Research                     | 2016 | Livers |    | 23  | 2004/1  | 2014/12 | Yes | This comparative study of a retrospective cohort was approved by the Ethical Committee of the First Affiliated Hospital of Zhejiang University                                                                                                                                                                           | No  |                                                                                                                 | 0  |
| 27 | Chen XY, Hou PF, Bi J, et al. Detection of human cytomegalovirus DNA in various blood components after liver transplantation. <i>Braz J Med Biol Res</i> 2014;47(4):340-44 Online First.                                                                                                                                                  | Brazilian Journal of Medical and Biological Research     | 2014 | Livers |    | 133 | 0       | 0       | No  |                                                                                                                                                                                                                                                                                                                          | No  |                                                                                                                 | 0  |
| 28 | Chen Y, Zhang H, Xiao X, et al. Peripheral blood transcriptome sequencing reveals rejection-relevant genes in long-term heart transplantation. <i>Int J Cardiol</i> 2013;168(3):2726-33 doi: 10.1016/j.ijcard.2013.03.095published Online First.                                                                                          | International Journal of Cardiology                      | 2013 | Hearts | DD | 12  | 2006    | 2010    | Yes | After approval of local Institutional Reviews Boards at Beijing Anzhen Hospital of the Capital University of Medical Sciences, all patients undergoing heart transplantation and control subjects providing informed consent were eligible for the cardiac allograft rejection digital gene expression analysis          | Yes | All the donors were from traffic accidents or cerebral bleeding coma (see Supplementary Materials and Methods). | 0  |



|    | A                                                                                                                                                                                                                                                                                            | B                                                | C    | D      | E       | F   | G       | H       | I   | J                                                                                                                                                                                                                                                                         | K   | L                                                                                                                                                                                       | M |
|----|----------------------------------------------------------------------------------------------------------------------------------------------------------------------------------------------------------------------------------------------------------------------------------------------|--------------------------------------------------|------|--------|---------|-----|---------|---------|-----|---------------------------------------------------------------------------------------------------------------------------------------------------------------------------------------------------------------------------------------------------------------------------|-----|-----------------------------------------------------------------------------------------------------------------------------------------------------------------------------------------|---|
| 29 | Chen YB, Li SD, Ju BL, et al. Suitable calcineurin inhibitor concentrations for liver transplant recipients in the Chinese population. <i>Transplant Proc</i> 2011;43(5):1751-53 doi: 10.1016/j.transproceed.2010.11.025published Online First.                                              | Transplantation Proceedings                      | 2011 | Livers |         | 97  | 2006    | 2008    | Yes | All grafts were procured with the consent of the donors abiding international ethical regulations. Note: the abstract is more definitive: "procurements were performed with donor consent conforming to international ethics regulations"                                 | Yes | Nothing in paper text but abstract says: "No grafts were obtained from prisoners"                                                                                                       | 0 |
| 30 | Chen Z, Gong R, Luo Y, et al. Surgical procedures for hepatolithiasis. <i>Hepatogastroenterology</i> 2010;57(97):134-7 Online First.                                                                                                                                                         | Hepato-Gastroenterology                          | 2010 | Livers |         | 15  | 2000/1  | 2006/12 | Yes | The ethical aspect of this study was approved by the Ethical Committee of our hospital.                                                                                                                                                                                   | Yes | All donors in the two groups voluntarily donated their liver.                                                                                                                           | 0 |
| 31 | Chen ZS, Zeng FJ, Ming CS, et al. The survival and value of liver transplantation for liver carcinoma: a single-center experience. <i>Transplant Proc</i> 2004;36(8):2284-6 Online First.                                                                                                    | Transplantation Proceedings                      | 2004 | Livers |         | 50  | 1999/1  | 2002/2  | No  |                                                                                                                                                                                                                                                                           | No  |                                                                                                                                                                                         | 0 |
| 32 | Chen ZY, Yan LN, Zeng Y, et al. Preliminary Experience With Indications for Liver Transplantation for Hepatolithiasis. <i>Transplant Proc</i> 2008;40(10):3517-22 doi: 10.1016/j.transproceed.2008.07.142published Online First.                                                             | Transplantation Proceedings                      | 2008 | Livers | DD      | 14  | 2000    | 2006    | Yes | The ethical aspects of this study were approved by our ethics committee.                                                                                                                                                                                                  | Yes | All donors in the 2 groups were voluntary .... The other 14 livers were derived from deceased donors. Their causes of death were accidental, and their ages ranged from 20 to 45 years. | 0 |
| 33 | Cheng J, Xie HY, Xu X, et al. NDRG1 as a biomarker for metastasis, recurrence and of poor prognosis in hepatocellular carcinoma. <i>Cancer Lett</i> 2011;310(1):35-45 Online First.                                                                                                          | Cancer Letters                                   | 2011 | Livers |         | 143 | 0       | 0       | Yes | This study was approved by the Ethic Committee of Zhejiang University                                                                                                                                                                                                     | No  |                                                                                                                                                                                         | 0 |
| 34 | Cheng JW, Shi YH, Fan J, et al. An immune function assay predicts post-transplant recurrence in patients with hepatocellular carcinoma. <i>J Cancer Res Clin Oncol</i> 2011;137(10):1445-53 doi: 10.1007/s00432-011-1014-0published Online First.                                            | Journal of Cancer Research and Clinical Oncology | 2011 | Livers |         | 197 | 2002    | 2010    | Yes | All blood samples were obtained following informed consent, according to an established protocol approved by the ethics committee of Fudan University.                                                                                                                    | No  |                                                                                                                                                                                         | 0 |
| 35 | Cheng L, Tian F, Tang L, et al. Local distribution analysis of cytotoxic molecules in liver allograft is helpful for the diagnosis of acute cellular rejection after orthotopic liver transplantation. <i>Diagn Pathol</i> 2012;7(1) doi: 10.1186/1746-1596-7-148published Online First.     | Diagnostic Pathology                             | 2012 | Livers |         | 73  | 2000    | 2006    | Yes | Written informed consent was obtained from all patients and this study was carried out in accordance with the principles of the Helsinki Declaration and approved by the Ethical Committee of the Third Military Medical University, Chongqing, Peoples Republic of China | No  |                                                                                                                                                                                         | 0 |
| 36 | Cheng Y, Huang L, Zhang X, et al. Liver transplantation nearly normalizes brain spontaneous activity and cognitive function at 1 month: A resting-state functional MRI study. <i>Metab Brain Dis</i> 2015;30(4):979-88 doi: 10.1007/s11011-015-9657-1published Online First.                 | Metabolic Brain Disease                          | 2015 | Livers |         | 12  | 2013    | 2014    | Yes | This study was approved by the Medical Research Ethics Committee of our hospital, and all the subjectsâ€™ written informed consents were obtained before the study.                                                                                                       | No  |                                                                                                                                                                                         | 0 |
| 37 | Cheng Y, Huang LX, Zhang L, et al. Longitudinal intrinsic brain activity changes in cirrhotic patients before and one month after liver transplantation. <i>Korean Journal of Radiology</i> 2017;18(2):370-77 Online First.                                                                  | Korean Journal of Radiology                      | 2017 | Livers |         | 20  | 2013/12 | 2015/10 | Yes | This study was approved by the Ethics Committee of Tianjin First Central Hospital, and we conducted all experiments in compliance with relevant guidelines and regulations. All participants provided written informed consent prior to the study.                        | No  |                                                                                                                                                                                         | 0 |
| 38 | Chu Z, Zhang J, Zhao Y, et al. Influence of immunosuppressive drugs on the development of CD4 +CD25high Foxp3+ T cells in liver transplant recipients. <i>Transplant Proc</i> 2010;42(7):2599-601 doi: 10.1016/j.transproceed.2010.04.026published Online First.                             | Transplantation Proceedings                      | 2010 | Livers |         | 47  | 0       | 0       | No  |                                                                                                                                                                                                                                                                           | Yes | No prisoners were used in the course of this study either as donors or recipients.                                                                                                      | 0 |
| 39 | Chuan W, Li C, Wen TF, et al. Short-term and long-term outcomes of surgical treatment for HCC within milan criteria with cirrhotic portal hypertension. <i>Hepatogastroenterology</i> 2014;61(136):2185-90 Online First.                                                                     | Hepato-Gastroenterology                          | 2014 | Livers | DD + LD | 39  | 2008/5  | 2011/10 | No  |                                                                                                                                                                                                                                                                           | No  |                                                                                                                                                                                         | 0 |
| 40 | Dai X, Zhao HQ, Liu RH, et al. Percutaneous radiofrequency ablation guided by contrastenhanced ultrasound in treatment of metastatic hepatocellular carcinoma after liver transplantation. <i>Asian Pac J Cancer Prev</i> 2012;13(8):3709-12 Online First.                                   | Asian Pacific Journal of Cancer Prevention       | 2012 | Livers |         | 124 | 0       | 0       | Yes | This study was conducted in accordance with the declaration of Helsinki and with the approval from the Ethics Committee of the 309th Hospital of Chinese PLA. Written informed consent was obtained from all participants.                                                | No  |                                                                                                                                                                                         | 0 |
| 41 | Dai Y, Li C, Wen TF, et al. Comparison of liver resection and transplantation for Child-pugh A cirrhotic patient with very early hepatocellular carcinoma and portal hypertension. <i>Pakistan Journal of Medical Sciences</i> 2014;30(5) doi: 10.12669/pjms.305.5038published Online First. | Pakistan Journal of Medical Sciences             | 2014 | Livers | DD      | 10  | 0       | 0       | Yes | All transplantations and this study itself were approved by the ethical committee of West China Hospital.                                                                                                                                                                 | No  |                                                                                                                                                                                         | 0 |
| 42 | Deng JF, Geng L, Qian YG, et al. The role of toll-like receptors 2 and 4 in acute allograft rejection after liver transplantation. <i>Transplant Proc</i> 2007;39(10):3222-24 doi: 10.1016/j.transproceed.2007.02.102published Online First.                                                 | Transplantation Proceedings                      | 2007 | Livers |         | 66  | 0       | 0       | No  |                                                                                                                                                                                                                                                                           | No  |                                                                                                                                                                                         | 0 |

|    | A                                                                                                                                                                                                                                                                                                                                      | B                                                | C    | D      | E  | F    | G      | H      | I   | J                                                                                                                                                                                                                                                                   | K   | L                                                                                                                                                                                                     | M   |
|----|----------------------------------------------------------------------------------------------------------------------------------------------------------------------------------------------------------------------------------------------------------------------------------------------------------------------------------------|--------------------------------------------------|------|--------|----|------|--------|--------|-----|---------------------------------------------------------------------------------------------------------------------------------------------------------------------------------------------------------------------------------------------------------------------|-----|-------------------------------------------------------------------------------------------------------------------------------------------------------------------------------------------------------|-----|
| 43 | Dong J, Zhu Y, Ma F, et al. Conditional disease-free survival after liver transplantation for hepatocellular carcinoma: A two-center experience. <i>Medicine (United States)</i> 2016;95(31) doi: 10.1097/MD.0000000000004383 published Online First.                                                                                  | Medicine (United States)                         | 2016 | Livers |    | 384  | 2003   | 2014   | Yes | The study was approved by the Institutional Review Boards of the respective institutions                                                                                                                                                                            | No  |                                                                                                                                                                                                       | 0   |
| 44 | Dong JY, Yin H, Li RD, et al. The relationship between adenosine triphosphate within CD4+ T lymphocytes and acute rejection after liver transplantation. <i>Clin Transplant</i> 2011;25(3):E292-E96 doi: 10.1111/j.1399-0012.2011.01429.x published Online First.                                                                      | Clinical Transplantation                         | 2011 | Livers |    | 83   | 2009   | 2009   | No  |                                                                                                                                                                                                                                                                     | No  |                                                                                                                                                                                                       | 0   |
| 45 | Duan BW, Lu SC, Lai W, et al. The detection of (total and ccc) HBV DNA in liver transplant recipients with hepatitis B vaccine against HBV reinfection. <i>Human Vaccines and Immunotherapeutics</i> 2015;11(10):2490-94 doi: 10.1080/21645515.2015.1063755 published Online First.                                                    | Human Vaccines and Immunotherapeutics            | 2015 | Livers |    | 55   | 1999   | 2010   | Yes | Prior to the study, the protocol was approved by the Institutional Review Board of Beijing You-An Hospital, Capital Medical University according to the guidelines of the 1975 Declaration of Helsinki. Written informed consent was obtained from all participants | No  |                                                                                                                                                                                                       | 0   |
| 46 | Duan BW, Lu SC, Wu JS, et al. Model for end-stage liver disease (MELD) score does not predict outcomes of hepatitis B induced acute-on-chronic liver failure in transplant recipients. <i>Transplant Proc</i> 2014;46(10):3502-06 doi: 10.1016/j.transproceed.2014.07.075 published Online First.                                      | Transplantation Proceedings                      | 2014 | Livers |    | 78   | 2004   | 2010   | Yes | Before the study, the protocol was approved by the Institutional Review Board of Beijing You-An Hospital according to the principles expressed in the 1975 Declaration of Helsinki, and written informed consent was obtained from each of the study patients.      | No  |                                                                                                                                                                                                       | 0   |
| 47 | Fan J, Yang GS, Fu ZR, et al. Liver transplantation outcomes in 1,078 hepatocellular carcinoma patients: A multi-center experience in Shanghai, China. <i>J Cancer Res Clin Oncol</i> 2009;135(10):1403-12 doi: 10.1007/s00432-009-0584-6 published Online First.                                                                      | Journal of Cancer Research and Clinical Oncology | 2009 | Livers | DD | 1074 | 2001   | 2007   | No  |                                                                                                                                                                                                                                                                     | Yes | All of the cadaveric donors were obtained from brain death or no-heart-beating donors with consent for voluntary organ donation                                                                       | OT  |
| 48 | Fan J, Zhang X, Chen XM, et al. Monitoring of human cytomegalovirus glycoprotein B genotypes using real-time quantitative PCR in immunocompromised Chinese patients. <i>J Virol Methods</i> 2009;160(1-2):74-77 Online First.                                                                                                          | Journal of Virological Methods                   | 2009 | Livers |    | 97   | 0      | 0      | No  |                                                                                                                                                                                                                                                                     | No  |                                                                                                                                                                                                       | 0   |
| 49 | Fan J, Zhang X, Ren L, et al. Donor IL-18 rs5744247 polymorphism as a new biomarker of tacrolimus elimination in Chinese liver transplant patients during the early post-transplantation period: Results from two cohort studies. <i>Pharmacogenomics</i> 2015;16(3):239-50 doi: 10.2217/pgs.14.166 published Online First.            | Pharmacogenomics                                 | 2015 | Livers |    | 84   | 2007   | 2011   | Yes | The study was approved by the Ethics Committee of Shanghai Jiaotong University and Qianfoshan hospital. Written informed consent was obtained from all patients in accordance with the Declaration of Helsinki and its amendments                                   | No  |                                                                                                                                                                                                       | 0   |
| 50 | Fan X, Chen Z, Nasralla D, et al. The organ preservation and enhancement of donation success ratio effect of extracorporeal membrane oxygenation in circulatory unstable brain death donor. <i>Clin Transplant</i> 2016;30(10):1306-13 Online First.                                                                                   | Clinical Transplantation                         | 2016 | Livers | DD | 32   | 2010/4 | 2015/5 | Yes | This study was reviewed by the ethical committee of our hospital. The study was conducted in accordance with the ethical standards laid down in Declaration of Helsinki (version of the 2000) as well as the Declaration of Istanbul 2008.                          | Yes | All organs that were transplanted in our hospital were from CDCD; none of them came from executed prisoners. AND the paper is "without any organs or tissue from prisoners or other executed persons" | DBD |
| 51 | Fang C, Yan S, Liu J, et al. Gastrointestinal perforation after liver transplantation. <i>Surgical Practice</i> 2016;20(1):8-12 Online First.                                                                                                                                                                                          | Surgical Practice                                | 2016 | Livers | DD | 8    | 2008/5 | 2014/2 | No  |                                                                                                                                                                                                                                                                     | No  |                                                                                                                                                                                                       | 0   |
| 52 | Feng ZY, Xu X, Zhu SM, et al. Effects of low central venous pressure during prehepatic phase on blood loss and liver and renal function in liver transplantation. <i>World J Surg</i> 2010;34(8):1864-73 doi: 10.1007/s00268-010-0544-y published Online First.                                                                        | World Journal of Surgery                         | 2010 | Livers | DD | 48   | 2006   | 2008   | Yes | Under the approval of the Ethical Committee of Zhejiang University, from September 2006 to January 2008, 86 adult patients with end-stage liver disease were scheduled for primary LTs at the First Affiliated Hospital, Medical School of Zhejiang University      | No  |                                                                                                                                                                                                       | 0   |
| 53 | Fu BS, Zhang T, Li H, et al. The role of liver transplantation for intrahepatic cholangiocarcinoma: A single-center experience. <i>Eur Surg Res</i> 2011;47(4):218-21 doi: 10.1159/000332827 published Online First.                                                                                                                   | European Surgical Research                       | 2011 | Livers | DD | 11   | 2003   | 2008   | No  |                                                                                                                                                                                                                                                                     | No  |                                                                                                                                                                                                       | 0   |
| 54 | Fu SJ, Ji F, Han M, et al. Prognostic value of combined preoperative fibrinogen and neutrophil-lymphocyte ratio in patients with hepatocellular carcinoma after liver transplantation. <i>Oncotarget</i> 2017;8(3):4301-12 Online First.                                                                                               | Oncotarget                                       | 2017 | Livers |    | 130  | 0      | 0      | No  |                                                                                                                                                                                                                                                                     | No  |                                                                                                                                                                                                       | 0   |
| 55 | Fu YW, Wang WG, Zhou HL, et al. Presence of donor-and-recipient-derived DNA microchimerism in the cell-free blood samples of renal transplantation recipients associates with the acceptance of transplanted kidneys. <i>Asian Journal of Andrology</i> 2006;8(4):477-82 doi: 10.1111/j.1745-7262.2006.00147.x published Online First. | Asian Journal of Andrology                       | 2006 | Livers |    | 126  | 1986   | 2000   | Yes | Approval documents have been obtained from the Clinical Research Ethics Committee of the Jilin University.                                                                                                                                                          | No  |                                                                                                                                                                                                       | 0   |
| 56 | Gao F, Ye Q, Wan Q, et al. Distribution and resistance of pathogens in liver transplant recipients with <i>Acinetobacter baumannii</i> infection. <i>Ther Clin Risk Manag</i> 2015;11:501-05 doi: 10.2147/TCRM.S82251 published Online First.                                                                                          | Therapeutics and Clinical Risk Management        | 2015 | Livers |    | 17   | 2007   | 2014   | Yes | À The ethics committees of the two hospitals involved approved the study                                                                                                                                                                                            | No  |                                                                                                                                                                                                       | 0   |

|    | A                                                                                                                                                                                                                                                                                                               | B                                                           | C    | D      | E  | F      | G       | H       | I   | J                                                                                                                                                                                                                                                                      | K   | L                                                                                                                                                               | M   |
|----|-----------------------------------------------------------------------------------------------------------------------------------------------------------------------------------------------------------------------------------------------------------------------------------------------------------------|-------------------------------------------------------------|------|--------|----|--------|---------|---------|-----|------------------------------------------------------------------------------------------------------------------------------------------------------------------------------------------------------------------------------------------------------------------------|-----|-----------------------------------------------------------------------------------------------------------------------------------------------------------------|-----|
| 57 | Gao PJ, Gao J, Li Z, et al. Hepatocellular carcinoma recurrence is an independent risk factor for HB recurrence after liver transplantation. <i>Hepatogastroenterology</i> 2014;61(134):1523-28 doi: 10.5754/hge14454published Online First.                                                                    | Hepato-Gastroenterology                                     | 2014 | Livers |    | 340    | 2004/7  | 2011/12 | Yes | The study was undertaken according to the ethical principles of the Helsinki Declaration. The protocol was approved by the Ethics Committee of the Peking University Peoples hospital.                                                                                 | No  |                                                                                                                                                                 | 0   |
| 58 | Gao PJ, Gao J, Li Z, et al. Liver transplantation in adults with portal vein thrombosis: Data from the China Liver Transplant Registry. <i>Clinics and Research in Hepatology and Gastroenterology</i> 2016;40(3):327-32 Online First.                                                                          | Clinics and Research in Hepatology and Gastroenterology     | 2016 | Livers |    | 20,524 | 1993/1  | 2013/6  | Yes | This study was approved by the Scientific Committee of the China Liver Transplant Registry. The current regulation of the Chinese Government and the Declaration of Helsinki were strictly followed for each organ donation.                                           | No  |                                                                                                                                                                 | 0   |
| 59 | Gao S, Lin BY, Yang Z, et al. Role of overexpression of MACC1 and/or FAK in predicting prognosis of hepatocellular carcinoma after liver transplantation. <i>Int J Med Sci</i> 2014;11(3):268-75 doi: 10.7150/ijms.7769published Online First.                                                                  | International Journal of Medical Sciences                   | 2014 | Livers |    | 160    | 2001/1  | 2010/1  | Yes | This study was approved by the ethical review committee of the First Affiliated Hospital, School of Medicine, Zhejiang University, and the study protocol conformed to the ethical guidelines of the 1975 Declaration of Helsinki.                                     | No  |                                                                                                                                                                 | 0   |
| 60 | Gao S, Yang Z, Zheng ZY, et al. Reduced expression of DACT2 promotes hepatocellular carcinoma progression: Involvement of methylation-mediated gene silencing. <i>World J Surg Oncol</i> 2013;11 Online First.                                                                                                  | World Journal of Surgical Oncology                          | 2013 | Livers |    | 61     | 2003    | 2005    | Yes | The study was approved by the local ethics committee, and informed consent was obtained from all of the patients.                                                                                                                                                      | No  |                                                                                                                                                                 | 0   |
| 61 | Gao Y, Ren H, Meng F, et al. Pathological roles of interleukin-22 in the development of recurrent hepatitis C after liver transplantation. <i>PLoS One</i> 2016;11(4) doi: 10.1371/journal.pone.0154419published Online First.                                                                                  | PLoS ONE                                                    | 2016 | Livers |    | 15     | 2010/6  | 2014/10 | Yes | Ethics approval was given by the Medical Ethics Committee of the 302 hospital and the study were in compliance with the Declaration of Helsinki.                                                                                                                       | Yes | No organ trafficking involved, but does not explicitly state that all livers came from donors.                                                                  | 0   |
| 62 | Gao Y, Zhang M, Li J, et al. Circulating FoxP3+ regulatory T and interleukin17-producing Th17 cells actively influence HBV clearance in De Novo Hepatitis B virus infected patients after orthotopic liver transplantation. <i>PLoS One</i> 2015;10(9) doi: 10.1371/journal.pone.0137881published Online First. | PLoS ONE                                                    | 2015 | Livers |    | 12     | 2010/6  | 2013/6  | Yes | The study protocol was approved by the Medical Ethics Committee of the 302 Hospital, Beijing, China, and adhered to the Declaration of Helsinki.                                                                                                                       | Yes | Organ donation was conducted legally, following local regulations. None of the transplant donors were from a vulnerable population or were subject to coercion. | 0   |
| 63 | Gao YJ, Zhang M, Jin B, et al. A clinical-pathological analysis of hepatitis B virus recurrence after liver transplantation in Chinese patients. <i>Journal of Gastroenterology and Hepatology (Australia)</i> 2014;29(3):554-60 doi: 10.1111/jgh.12404published Online First.                                  | Journal of Gastroenterology and Hepatology (Australia)      | 2014 | Livers |    | 253    | 2005/7  | 2010/6  | Yes | The study protocol was approved by the Medical Ethics Committee of the 302 Military Hospital, Beijing, China, and adhered to the Declaration of Helsinki.                                                                                                              | Yes | Organ donation was conducted legally, following local regulations.                                                                                              | 0   |
| 64 | Gu L, Jin W, Kan L, et al. A retrospective study to compare the use of tacrolimus and cyclosporine in combination with adriamycin in post-transplant liver cancer patients. <i>Cell Biochem Biophys</i> 2014;71(2):565-70 doi: 10.1007/s12013-014-0235-7published Online First.                                 | Cell Biochemistry and Biophysics                            | 2014 | Livers |    | 190    | 2007/7  | 2009/3  | No  |                                                                                                                                                                                                                                                                        | No  |                                                                                                                                                                 | 0   |
| 65 | Gu L, Yu YC. Clinical outcome of dental implants placed in liver transplant recipients after 3 years: A case series. <i>Transplant Proc</i> 2011;43(7):2678-82 doi: 10.1016/j.transproceed.2011.06.037published Online First.                                                                                   | Transplantation Proceedings                                 | 2011 | Livers | DD | 13     | 2005/1  | 2007/1  | No  |                                                                                                                                                                                                                                                                        | Yes | No organs from prisoners was used in this study.                                                                                                                | 0   |
| 66 | Gu LH, Fang H, Li FH, et al. Prediction of early hepatic artery thrombosis by intraoperative color doppler ultrasound in pediatric segmental liver transplantation. <i>Clin Transplant</i> 2012;26(4):571-76 doi: 10.1111/j.1399-0012.2011.01580.xpublished Online First.                                       | Clinical Transplantation                                    | 2012 | Livers |    | 2      | 2006/10 | 2010/12 | Yes | The study was performed according to the principles of the Declaration of Helsinki and was approved by the ethics committee of the hospital.                                                                                                                           | No  |                                                                                                                                                                 | 0   |
| 67 | Gu Z, Chen B, Song Y, et al. Pharmacokinetics of free mycophenolic acid and limited sampling strategy for the estimation of area under the curve in liver transplant patients. <i>Eur J Pharm Sci</i> 2012;47(4):636-41 doi: 10.1016/j.ejps.2012.08.001published Online First.                                  | European Journal of Pharmaceutical Sciences                 | 2012 | Livers |    | 50     | 0       | 0       | Yes | Informed consent was obtained from all patients. The study protocol was approved by the Ruijin Hospital Research Ethics Committee.                                                                                                                                     | No  |                                                                                                                                                                 | 0   |
| 68 | Guo CB, Li YC, Zhang MM, et al. Early postoperative care of liver transplantation for infants with biliary atresia during pediatric intensive care unit stay. <i>Transplant Proc</i> 2010;42(5):1750-54 doi: 10.1016/j.transproceed.2010.02.086published Online First.                                          | Transplantation Proceedings                                 | 2010 | Livers | DD | 1      | 2006/1  | 2009/1  | Yes | We retrospectively reviewed patient records with institutional review board approval.                                                                                                                                                                                  | Yes | No grafts were from executed prisoners.                                                                                                                         | 0   |
| 69 | Guo QL, Duan BW, Lu SC, et al. Liver transplantation for hepatitis B-related acute-on-chronic liver failure patients. <i>Int J Clin Exp Med</i> 2017;10(2):2882-89 Online First.                                                                                                                                | International Journal of Clinical and Experimental Medicine | 2017 | Livers | DD | 370    | 2010/1  | 2014/12 | Yes | The protocol was approved by the Institutional Review Board of Beijing You-An Hospital, Capital Medical University according to the principles expressed in the 1975 Declaration of Helsinki, and written informed consents were obtained from all the study patients. | No  |                                                                                                                                                                 | DCD |

|    | A                                                                                                                                                                                                                                                                                  | B                                                    | C    | D      | E  | F   | G      | H       | I   | J                                                                                                                                                                                                                                    | K   | L                                                                                                | M   |
|----|------------------------------------------------------------------------------------------------------------------------------------------------------------------------------------------------------------------------------------------------------------------------------------|------------------------------------------------------|------|--------|----|-----|--------|---------|-----|--------------------------------------------------------------------------------------------------------------------------------------------------------------------------------------------------------------------------------------|-----|--------------------------------------------------------------------------------------------------|-----|
| 70 | Guo W, Sheng J, Gu Y, et al. Analysis and forecast for multidrug-resistant <i>Acinetobacter baumannii</i> infections among liver transplant recipients. <i>Transplant Proc</i> 2014;46(5):1448-52 doi: 10.1016/j.transproceed.2014.02.027published Online First.                   | Transplantation Proceedings                          | 2014 | Livers |    | 249 | 2007/1 | 2009/1  | No  |                                                                                                                                                                                                                                      | No  |                                                                                                  | 0   |
| 71 | Guo Z, He X, Wu L, et al. Model for end-stage liver disease versus the Child-Pugh score in predicting the post-transplant 3-month and 1-year mortality in a cohort of Chinese recipients. <i>Surg Today</i> 2010;40(1):38-45 doi: 10.1007/s00595-009-4114-6published Online First. | Surgery Today                                        | 2010 | Livers | DD | 117 | 1998/1 | 2007/1  | Yes | Informed consent was obtained from all donors and recipients before transplantation, and the study strictly followed the guidelines of the Ethical Committee of our hospital and the Declaration of Helsinki                         | No  |                                                                                                  | 0   |
| 72 | Gurbanov E, Meng X, Cui Y, et al. Evaluation ECMO in adult cardiac transplantation: can outcomes of marginal donor hearts be improved? <i>J Cardiovasc Surg (Torino)</i> 2011;52(3):419-27 Online First.                                                                           | Journal of Cardiovascular Surgery                    | 2011 | Hearts | DD | 22  | 2005/2 | 2009/9  | Yes | Informed consent has been obtained for all the patients prior to surgery. This study was approved by the Institutional Investigational Review Board.                                                                                 | No  |                                                                                                  | 0   |
| 73 | Han ZB, Chen HY, Fan JW, et al. Up-regulation of microRNA-155 promotes cancer cell invasion and predicts poor survival of hepatocellular carcinoma following liver transplantation. <i>J Cancer Res Clin Oncol</i> 2011;137(9) Online First.                                       | Journal of Cancer Research and Clinical Oncology     | 2011 | Livers |    | 100 | 2002   | 2007    | Yes | All patients provided informed consent according to the protocols approved by the Institutional Review Boards of Shanghai First People's Hospital                                                                                    | No  |                                                                                                  | 0   |
| 74 | Han ZB, Zhong L, Teng MJ, et al. Identification of recurrence-related microRNAs in hepatocellular carcinoma following liver transplantation. <i>Mol Oncol</i> 2012;6(4):445-57 doi: 10.1016/j.molonc.2012.04.001published Online First.                                            | Molecular Oncology                                   | 2012 | Livers |    | 165 | 2002/1 | 2007/12 | Yes | All patients were provided informed consents according to the protocols approved by the Institutional Review Boards of Shanghai First People's Hospital and Shandong Provincial Qianfoshan Hospital.                                 | No  |                                                                                                  | 0   |
| 75 | Hao C, Anwei M, Bing C, et al. Monitoring mycophenolic acid pharmacokinetic parameters in liver transplant recipients: prediction of occurrence of leukopenia. <i>Liver Transpl</i> 2008;14(8):1165-73 Online First.                                                               | Liver Transplantation                                | 2008 | Livers |    | 63  | 0      | 0       | Yes | The study design was approved by the independent ethics committee of Ruijin Hospital; the procedure was described in detail to all patients before admission, and informed consent was obtained.                                     | No  |                                                                                                  | 0   |
| 76 | Hao C, Erzhen C, Anwei M, et al. Validation of limited sampling strategy for the estimation of mycophenolic acid exposure in Chinese adult liver transplant recipients. <i>Liver Transpl</i> 2007;13(12):1684-93 Online First.                                                     | Liver Transplantation                                | 2007 | Livers |    | 30  | 0      | 0       | Yes | The study was approved by the independent ethics committee of Ruijin Hospital. The procedure was described in detail to all patients before admission, and informed consent was obtained.                                            | No  |                                                                                                  | 0   |
| 77 | Hei Z, Chi X, Cheng N, et al. Upregulation of TLR2/4 expression in mononuclear cells in postoperative systemic inflammatory response syndrome after liver transplantation. <i>Mediators Inflamm</i> 2010;2010 doi: 10.1155/2010/519589published Online First.                      | Mediators of Inflammation                            | 2010 | Livers | DD | 18  | 0      | 0       | Yes | This study was approved by the Research Ethics Board of The Third Affiliated Hospital, Sun Yat-sen University. Written informed consent was obtained from all patients prior to the enrollment.                                      | No  |                                                                                                  | MX  |
| 78 | Hu B, Gao DJ, Yu FH, et al. Endoscopic stenting for post-transplant biliary stricture: Usefulness of a novel removable covered metal stent. <i>Journal of Hepato-Biliary-Pancreatic Sciences</i> 2011;18(5):640-45 doi: 10.1007/s00534-011-0408-3published Online First.           | Journal of Hepato-Biliary-Pancreatic Sciences        | 2011 | Livers | DD | 13  | 2008/7 | 2010/6  | Yes | The study protocol was approved by the Institutional Review Board for human research of the EHBH, and all patients gave informed consent to participate in the study                                                                 | No  |                                                                                                  | 0   |
| 79 | Hu J, Wang Z, Fan J, et al. Genetic variations in plasma circulating DNA of HBV-related hepatocellular carcinoma patients predict recurrence after liver transplantation. <i>PLoS One</i> 2011;6(10) doi: 10.1371/journal.pone.0026003published Online First.                      | PLoS ONE                                             | 2011 | Livers | DD | 209 | 2004/1 | 2008/6  | Yes | The study protocol was approved by The Research Ethics Committee of Zhongshan Hospital, Fudan University. Informed written consent was obtained according to the Declaration of Helsinki.                                            | No  |                                                                                                  | 0   |
| 80 | Hu J, Xie X, Li Y, et al. A novel noninvasive method to detect rejection after heart transplantation. <i>Braz J Med Biol Res</i> 2012;45(12):1195-201 doi: 10.1590/S0100-879X2012007500164published Online First.                                                                  | Brazilian Journal of Medical and Biological Research | 2012 | Hearts | DD | 47  | 2001   | 2010    | Yes | The study was approved by the Ethics Committee of Fourth Military Medical University                                                                                                                                                 | No  |                                                                                                  | 0   |
| 81 | Hu WY, Wu LQ, Su Z, et al. Expression of human leukocyte antigen-G and acute rejection in patients following liver transplantation. <i>Exp Ther Med</i> 2014;8(4):1291-95 doi: 10.3892/etm.2014.1917published Online First.                                                        | Experimental and Therapeutic Medicine                | 2014 | Livers | DD | 59  | 2005   | 2009    | Yes | The present study was approved by the ethics committee of Qingdao University (Qingdao, China). All of the patients have given their consents for this study                                                                          | No  |                                                                                                  | 0   |
| 82 | Hu XX, Yan LN. Retrospective analysis of prognostic factors after liver transplantation for intrahepatic cholangiocarcinoma in China: A single-center experience. <i>Hepatogastroenterology</i> 2011;58(109):1255-59 doi: 10.5754/hge10704published Online First.                  | Hepato-Gastroenterology                              | 2011 | Livers | DD | 24  | 1999/2 | 2010/2  | Yes | All the liver grafts were from brain dead donors who were voluntary and altruistic in all cases, approved by the West China Hospital Ethics Committee, and in accordance with the ethical guidelines of the Declaration of Helsinki. | Yes | All the liver grafts were from brain dead donors who were voluntary and altruistic in all cases. | DBD |
| 83 | Hu Y, Zhang X, Liu Y, et al. APACHE IV is superior to MELD scoring system in predicting prognosis in patients after orthotopic liver transplantation. <i>Clinical and Developmental Immunology</i> 2013;2013 doi: 10.1155/2013/809847published Online First.                       | Clinical and Developmental Immunology                | 2013 | Livers | DD | 195 | 2006   | 2009    | No  |                                                                                                                                                                                                                                      | No  |                                                                                                  | OT  |
| 84 | Hu Z, Zhou J, Li Z, et al. Salvage liver transplantation for recurrent hepatocellular carcinoma after liver resection: Retrospective study of the Milan and Hangzhou criteria. <i>PLoS One</i> 2014;9(1) doi: 10.1371/journal.pone.0087222published Online First.                  | PLoS ONE                                             | 2014 | Livers | DD | 53  | 2004   | 2012    | Yes | Ethical approval was obtained from the Committee of Ethics in Biomedical Research of Zhejiang University. Written informed consent was obtained from all participants.                                                               | No  |                                                                                                  | 0   |

|    | A                                                                                                                                                                                                                                                                                                                  | B                                         | C    | D      | E  | F   | G       | H       | I   | J                                                                                                                                                                                                                                                                                                                                                                                                                                                                                                                                                                                                         | K  | L | M |
|----|--------------------------------------------------------------------------------------------------------------------------------------------------------------------------------------------------------------------------------------------------------------------------------------------------------------------|-------------------------------------------|------|--------|----|-----|---------|---------|-----|-----------------------------------------------------------------------------------------------------------------------------------------------------------------------------------------------------------------------------------------------------------------------------------------------------------------------------------------------------------------------------------------------------------------------------------------------------------------------------------------------------------------------------------------------------------------------------------------------------------|----|---|---|
| 85 | Hu Z, Zhou J, Li Z, et al. Time interval to recurrence as a predictor of overall survival in salvage liver transplantation for patients with hepatocellular carcinoma associated with hepatitis B virus. <i>Surgery (United States)</i> 2015;157(2):239-48 doi: 10.1016/j.surg.2014.09.018 published Online First. | Surgery (United States)                   | 2015 | Livers | DD | 62  | 2001    | 2012    | Yes | This single-center, retrospective study was approved by the Liver Transplant Center of the First Affiliated Hospital of Zhejiang University. All data were obtained from the clinical records of SLT recipients. Ethical approval was obtained from the Committee of Ethics in Biomedical Research of Zhejiang University, and written informed consent was obtained from all participants.                                                                                                                                                                                                               | No |   | 0 |
| 86 | Huang J, Yan L, Wu H, et al. Is radiofrequency ablation applicable for recurrent hepatocellular carcinoma after liver transplantation? <i>J Surg Res</i> 2016;200(1):122-30 Online First.                                                                                                                          | Journal of Surgical Research              | 2016 | Livers | DD | 269 | 1997/3  | 2012/12 | Yes | This study conformed to the ethical guidelines of the 1975 Declaration of Helsinki and approved by the Clinical Trial Ethics Committee of West China Hospital, Sichuan University. Each recruited patient was registered at the China Liver Transplant Registry, and a written informed consent was obtained from each patient included in the study.                                                                                                                                                                                                                                                     | No |   | 0 |
| 87 | Huang L, Li GM, Zhu JY, et al. Efficacy of sorafenib after liver transplantation in patients with primary hepatic carcinoma exceeding the Milan criteria: A preliminary study. <i>Onco Targets Ther</i> 2012;5:457-62 doi: 10.2147/OTT.S31387 published Online First.                                              | OncoTargets and Therapy                   | 2012 | Livers | DD | 97  | 2008    | 2010    | No  |                                                                                                                                                                                                                                                                                                                                                                                                                                                                                                                                                                                                           | No |   | 0 |
| 88 | Huang M, Shan H, Jiang Z, et al. The use of coronary stent in hepatic artery stenosis after orthotopic liver transplantation. <i>Eur J Radiol</i> 2006;60(3):425-30 doi: 10.1016/j.ejrad.2006.06.008 published Online First.                                                                                       | European Journal of Radiology             | 2006 | Livers | DD | 430 | 2003/11 | 2005/9  | Yes | Written informed consent was obtained from all patients involved in this interventional procedure.                                                                                                                                                                                                                                                                                                                                                                                                                                                                                                        | No |   | 0 |
| 89 | Huang Q, Zhai RY, Dai DK. Interventional Treatment of Hepatic Artery Stenosis After Orthotopic Liver Transplantation With Balloon-Expandable Coronary Stent. <i>Transplant Proc</i> 2007;39(10):3245-50 doi: 10.1016/j.transproceed.2007.03.109 published Online First.                                            | Transplantation Proceedings               | 2007 | Livers | DD | 11  | 2004/6  | 2006/9  | No  |                                                                                                                                                                                                                                                                                                                                                                                                                                                                                                                                                                                                           | No |   | 0 |
| 90 | Huang Y, Yang X, Zhao F, et al. Overexpression of Dickkopf-1 predicts poor prognosis for patients with hepatocellular carcinoma after orthotopic liver transplantation by promoting cancer metastasis and recurrence. <i>Med Oncol</i> 2014;31(7) Online First.                                                    | Medical Oncology                          | 2014 | Livers |    | 148 | 2001    | 2005    | Yes | Ethical approval was obtained from the Zhongshan Hospital Research Ethics Committee, and written informed consent was obtained from each patient.                                                                                                                                                                                                                                                                                                                                                                                                                                                         | No |   | 0 |
| 91 | Huang ZY, Liang BY, Xiong M, et al. Severity of cirrhosis should determine the operative modality for patients with early hepatocellular carcinoma and compensated liver function. <i>Surgery (United States)</i> 2016;159(2):621-31 Online First.                                                                 | Surgery (United States)                   | 2016 | Livers |    | 51  | 2001    | 2009    | Yes | The study protocol was approved by the medical ethics committee of Tongji Hospital, Huazhong Science and Technology University, China. Written consent was given by the patients for their information to be stored in the hospital database and used for research. ... The source of the organs for transplantation was in compliance with international ethical standards. Each organ donation or transplant in our center was performed strictly under the guideline of the Ethical Committee of our hospital, the regulation of Organ Transplant Committee of China, and the declaration of Helsinki. | No |   | 0 |
| 92 | Huijun M, Ji Z, Ping X, et al. Linkage disequilibrium between tnfr-308 G/A promoter and histocompatibility leukocyte antigen alleles in han-nationality lung transplant recipients from eastern china. <i>Exp Clin Transplant</i> 2013;11(3):264-69 doi: 10.6002/ect.2012.0099 published Online First.             | Experimental and Clinical Transplantation | 2013 | Lungs  | DD | 106 | 2004/8  | 2011/7  | Yes | All protocols were approved by the ethics committee of the institution before the study began, and the protocols conformed with the ethical guidelines of the 1975 Helsinki Declaration. Written, informed consent was obtained from all patients.                                                                                                                                                                                                                                                                                                                                                        | No |   | 0 |
| 93 | Jiang GQ, Bai DS, Chen P, et al. Starting hemoglobin value predicts early phase prognosis after liver transplantation. <i>Transplant Proc</i> 2011;43(5):1669-73 doi: 10.1016/j.transproceed.2010.12.067 published Online First.                                                                                   | Transplantation Proceedings               | 2011 | Livers | DD | 102 | 1996/7  | 2009/7  | No  |                                                                                                                                                                                                                                                                                                                                                                                                                                                                                                                                                                                                           | No |   | 0 |

|     | A                                                                                                                                                                                                                                                                                                                                             | B                                         | C    | D      | E  | F   | G       | H       | I   | J                                                                                                                                                                                                                                                                                                                                                                                                                                                                                                                            | K   | L                                                                                                                                       | M   |
|-----|-----------------------------------------------------------------------------------------------------------------------------------------------------------------------------------------------------------------------------------------------------------------------------------------------------------------------------------------------|-------------------------------------------|------|--------|----|-----|---------|---------|-----|------------------------------------------------------------------------------------------------------------------------------------------------------------------------------------------------------------------------------------------------------------------------------------------------------------------------------------------------------------------------------------------------------------------------------------------------------------------------------------------------------------------------------|-----|-----------------------------------------------------------------------------------------------------------------------------------------|-----|
| 94  | Jiang L, Lei JY, Wang WT, et al. Immediate radical therapy or conservative treatments when meeting the Milan criteria for advanced HCC patients after successful TACE. <i>J Gastrointest Surg</i> 2014;18(6):1125-30 Online First.                                                                                                            | Journal of Gastrointestinal Surgery       | 2014 | Livers | DD | 13  | 2003/8  | 2008/10 | Yes | LT includes living-donor liver transplantation (LDLT) or deceased-donor liver transplantation (DDLT); all of the living-donor liver transplantations were performed after approval by the Ethics Committee of Sichuan University and local authorities. Written consent was provided by the donors, and their information was stored in the hospital database and used for research. All of the deceased donors were patients in our hospital who had been declared brain dead. No prisoners served as donors in our center. | Yes | All of the deceased donors were patients in our hospital who had been declared brain dead. No prisoners served as donors in our center. | DBD |
| 95  | Jiang T, Li C, Duan B, et al. Risk factors for and management of ischemic-type biliary lesions following orthotopic liver transplantation: A single center experience. <i>Ann Hepatol</i> 2016;15(1):41-46 doi: 10.5604/16652681.1184204 published Online First.                                                                              | American Journal of Transplantation       | 2010 | Livers | DD | 184 | 2002/5  | 2009/12 | Yes | Living and deceased donations were voluntary and altruistic in all cases, approved by the West China Hospital Ethics Committee, and in accordance with the ethical guidelines of the Declaration of Helsinki.                                                                                                                                                                                                                                                                                                                | Yes | Living and deceased donations were voluntary and altruistic in all cases.                                                               | DBD |
| 96  | Jiang T, Liu S, Xiao X, et al. Diagnosis of rejection after liver transplantation: Use of phosphorus-31 magnetic resonance spectroscopy (31P-MRS). <i>Abdom Imaging</i> 2012;37(5):788-94 doi: 10.1007/s00261-008-9451-1 published Online First.                                                                                              | Annals of Hepatology                      | 2016 | Livers | DD | 528 | 2007/1  | 2014/1  | Yes | This study was approved by the Ethics Committee of Beijing You-An Hospital, and informed written consent was obtained before the patients received treatment according to the Declaration of Helsinki and its amendments                                                                                                                                                                                                                                                                                                     | No  |                                                                                                                                         | 0   |
| 97  | Jiang Z, Chen Y, Feng X, et al. Recipient cytotoxic T lymphocyte antigen 4 +49 single-nucleotide polymorphism is not associated with acute rejection after liver transplantation in Chinese population. <i>Int J Med Sci</i> 2013;10(3):250-54 doi: 10.7150/ijms.5511 published Online First.                                                 | Abdominal Imaging                         | 2012 | Livers | DD | 66  | 0       | 0       | No  |                                                                                                                                                                                                                                                                                                                                                                                                                                                                                                                              | No  |                                                                                                                                         | 0   |
| 98  | Jiang Z, Feng X, Zhang W, et al. Recipient cytotoxic T lymphocyte antigen-4 +49 G/G genotype is associated with reduced incidence of hepatitis B virus recurrence after liver transplantation among Chinese patients. <i>Liver International</i> 2007;27(9):1202-08 doi: 10.1111/j.1478-3231.2007.01553.x published Online First.             | International Journal of Medical Sciences | 2013 | Livers | DD | 335 | 2005/1  | 2010/12 | Yes | Written informed consent was obtained from all participants or their guardians and the study protocol was approved by the Ethics Committee of our hospital. The protocol conforms with the ethical guidelines of the 1975 Helsinki Declaration.                                                                                                                                                                                                                                                                              | No  |                                                                                                                                         | 0   |
| 99  | Jiao ZY, Jiao Z. Prophylaxis of recurrent hepatitis b in Chinese patients after liver transplantation using lamivudine combined with Hepatitis B immune globulin according to the titer of antibody to Hepatitis B surface antigen. <i>Transplant Proc</i> 2007;39(5):1533-36 doi: 10.1016/j.transproceed.2007.03.062 published Online First. | Liver International                       | 2007 | Livers | DD | 167 | 2003/1  | 2005/12 | No  |                                                                                                                                                                                                                                                                                                                                                                                                                                                                                                                              | No  |                                                                                                                                         | 0   |
| 100 | Jin R, Duan H, Zhao C, et al. Pharmacokinetics of cyclosporine A in Chinese heart transplant recipients. <i>Immunopharmacol Immunotoxicol</i> 2012;34(3):519-22 doi: 10.3109/08923973.2011.613400 published Online First.                                                                                                                     | Transplantation Proceedings               | 2007 | Livers | DD | 85  | 1999/1  | 2005/9  | No  |                                                                                                                                                                                                                                                                                                                                                                                                                                                                                                                              | No  |                                                                                                                                         | 0   |
| 101 | Jin Z, Zhang WX, Chen B, et al. Stepwise regression analysis of the determinants of blood tacrolimus concentrations in Chinese patients with liver transplant. <i>Medicinal Chemistry</i> 2009;5(3):301-04 doi: 10.2174/157340609788185918 published Online First.                                                                            | Immunopharmacology and Immunotoxicology   | 2012 | Hearts | DD | 5   | 0       | 0       | No  |                                                                                                                                                                                                                                                                                                                                                                                                                                                                                                                              | No  |                                                                                                                                         | 0   |
| 102 | Ju W, Chen M, Guo Z, et al. Allografts positive for hepatitis B surface antigen in liver transplant for disease related to hepatitis B virus. <i>Exp Clin Transplant</i> 2013;11(3):245-49 doi: 10.6002/ect.2012.0095 published Online First.                                                                                                 | Medicinal Chemistry                       | 2009 | Livers | DD | 29  | 2006/6  | 2007/3  | Yes | All cases signed an informed consent.                                                                                                                                                                                                                                                                                                                                                                                                                                                                                        | No  |                                                                                                                                         | 0   |
| 103 | Ju WQ, Guo ZY, Liang WH, et al. Sirolimus conversion in liver transplant recipients with calcineurin inhibitor-induced complications: Efficacy and safety. <i>Exp Clin Transplant</i> 2012;10(2):132-35 doi: 10.6002/ect.2010.0126 published Online First.                                                                                    | Experimental and Clinical Transplantation | 2013 | Livers | DD | 23  | 2007/1  | 2010/2  | Yes | All transplants were approved by the ethics committee of the hospital, and written, informed consent was obtained from every patient and/or his/her guardian.... All protocols were approved by the ethics committee of the institution before the study began, and the protocols conformed with the ethical guidelines of the 1975 Helsinki Declaration.                                                                                                                                                                    | No  |                                                                                                                                         | 0   |
| 104 | Ju WQ, Guo ZY, Ling X, et al. Twenty-four hour steroid avoidance immunosuppressive regimen in liver transplant recipients. <i>Exp Clin Transplant</i> 2012;10(3):258-62 doi: 10.6002/ect.2010.0127 published Online First.                                                                                                                    | Experimental and Clinical Transplantation | 2012 | Livers | DD | 25  | 2005/10 | 2008/12 | Yes | The study protocol was in accord with the ethical guidelines of the 1975 Helsinki Declaration, and was approved by our local institutional ethics committee. Written, informed consent was obtained from all subjects.                                                                                                                                                                                                                                                                                                       | No  |                                                                                                                                         | 0   |

|     | A                                                                                                                                                                                                                                                                                                                | B                                                   | C    | D      | E  | F   | G      | H       | I   | J                                                                                                                                                                                                                                                                                                                                                                                                                                                                                                                                                                                  | K   | L                                                                                                                                                                                                                                                                                  | M   |
|-----|------------------------------------------------------------------------------------------------------------------------------------------------------------------------------------------------------------------------------------------------------------------------------------------------------------------|-----------------------------------------------------|------|--------|----|-----|--------|---------|-----|------------------------------------------------------------------------------------------------------------------------------------------------------------------------------------------------------------------------------------------------------------------------------------------------------------------------------------------------------------------------------------------------------------------------------------------------------------------------------------------------------------------------------------------------------------------------------------|-----|------------------------------------------------------------------------------------------------------------------------------------------------------------------------------------------------------------------------------------------------------------------------------------|-----|
| 105 | Kong HY, Huang SQ, Zhu SM, et al. Role of anhepatic time in endothelial-related coagulation in liver transplantation. <i>Minerva Anestesiol</i> 2013;79(4):391-97 Online First.                                                                                                                                  | Experimental and Clinical Transplantation           | 2012 | Livers | DD | 82  | 2006/9 | 2008/9  | Yes | The study protocol was approved by the ethical board of our institute, and the study was conducted in accord with the Helsinki Declaration. Written, informed consent was obtained from all recipients.                                                                                                                                                                                                                                                                                                                                                                            | No  |                                                                                                                                                                                                                                                                                    | 0   |
| 106 | Kong HY, Wen XH, Huang SQ, et al. Epsilon-aminocaproic acid improves postreirculation hemodynamics by reducing intraliver activated protein C consumption in orthotopic liver transplantation. <i>World J Surg</i> 2014;38(1):177-85 doi: 10.1007/s00268-013-2282-4published Online First.                       | Minerva Anesthesiologia                             | 2013 | Livers | DD | 50  | 0      | 0       | Yes | The study was approved by the institutional ethics committee                                                                                                                                                                                                                                                                                                                                                                                                                                                                                                                       | No  |                                                                                                                                                                                                                                                                                    | 0   |
| 107 | Lai MC, Yang Z, Zhou L, et al. Long non-coding RNA MALAT-1 overexpression predicts tumor recurrence of hepatocellular carcinoma after liver transplantation. <i>Med Oncol</i> 2012;29(3):1810-16 doi: 10.1007/s12032-011-0004-zpublished Online First.                                                           | World Journal of Surgery                            | 2014 | Livers | DD | 59  | 0      | 0       | Yes | The study was conducted after receiving IRB approval (School of Medicine, Zhejiang University, China), and obtaining written informed consent (ChiCTR-TRC11001662).                                                                                                                                                                                                                                                                                                                                                                                                                | No  |                                                                                                                                                                                                                                                                                    | 0   |
| 108 | Lei J, Wang W, Yan L. Downstaging advanced hepatocellular carcinoma to the Milan criteria may provide a comparable outcome to conventional Milan criteria. <i>J Gastrointest Surg</i> 2013;17(8):1440-6 Online First.                                                                                            | Medical Oncology                                    | 2012 | Livers | DD | 60  | 2003/1 | 2005/12 | Yes | Our work was approved by the local ethics committee, and written informed consent was obtained from all the patients.                                                                                                                                                                                                                                                                                                                                                                                                                                                              | No  |                                                                                                                                                                                                                                                                                    | 0   |
| 109 | Lei J, Yan L. Outcome comparisons among the Hangzhou, Chengdu, and UCSF criteria for hepatocellular carcinoma liver transplantation after successful downstaging therapies. <i>J Gastrointest Surg</i> 2013;17(6):1116-22 doi: 10.1007/s11605-013-2140-6published Online First.                                  | Journal of Gastrointestinal Surgery                 | 2013 | Livers | DD | 132 | 2001/7 | 2013/1  | No  |                                                                                                                                                                                                                                                                                                                                                                                                                                                                                                                                                                                    | No  |                                                                                                                                                                                                                                                                                    | 0   |
| 110 | Lei JY, Wang WT, Yan LN. Hangzhou criteria for liver transplantation in hepatocellular carcinoma: A single-center experience. <i>Eur J Gastroenterol Hepatol</i> 2014;26(2):200-04 doi: 10.1097/MEG.0b013e3283652b66published Online First.                                                                      | Journal of Gastrointestinal Surgery                 | 2013 | Livers | DD | 197 | 2001/4 | 2012/8  | Yes | Each organ donation or transplantation in our center was performed strictly according to the guidelines of the ethical committee of our hospital, the regulations of the Organ Transplant Committee of Sichuan Province, and the Declaration of Helsinki. No prisoners served as donors in our center. For LDLT, the donation was voluntary and altruistic, and we informed the donors and their families of the possible risks of donor hepatectomy. Written consent was provided by the donors for their information to be stored in the hospital database and used for research | Yes | No prisoners served as donors in our center. For LDLT, the donation was voluntary and altruistic,                                                                                                                                                                                  | 0   |
| 111 | Lei JY, Yan LN, Wang WT, et al. Health-related quality of life and psychological distress in patients with early-stage hepatocellular carcinoma after hepatic resection or transplantation. <i>Transplant Proc</i> 2016;48(6):2107-11 Online First.                                                              | European Journal of Gastroenterology and Hepatology | 2014 | Livers | DD | 278 | 2000/8 | 2010/12 | Yes | All of the living donor liver transplantation (LDLT) procedures were performed after approval from the Ethics Committee of the West China Hospital and local authority was obtained.                                                                                                                                                                                                                                                                                                                                                                                               | Yes | The donors voluntarily agreed to transplantation and were required to be outside the third degree of consanguinity with the recipients as verified by the Health Administrative Department and Public Security Organs or by a DNA test. There were no prisoner donors in our study | 0   |
| 112 | Lei JY, Yan LN, Zhu JQ, et al. Hepatocellular carcinoma patients may benefit from postoperative huaier aqueous extract after liver transplantation. <i>Transplant Proc</i> 2015;47(10):2920-24 doi: 10.1016/j.transproceed.2015.10.045published Online First.                                                    | Transplantation Proceedings                         | 2016 | Livers | DD | 95  | 2000/8 | 2010/7  | Yes | All of the living-donor liver transplantations were performed after approval by the Ethics Committee of Sichuan University and the local authority, the Health Department of Sichuan Province... This study protocol conformed to the ethical guidelines of the Declaration of Helsinki and was approved by the Ethics Committee of our hospital and local authority. All participants provided written informed consent.                                                                                                                                                          | Yes | In addition, the donation was voluntary and altruistic. All of the deceased donors were brain-dead donors in our hospital.                                                                                                                                                         | DBD |
| 113 | Li C, Zhang F, Zhang W, et al. Feasibility of 125I brachytherapy combined with sorafenib treatment in patients with multiple lung metastases after liver transplantation for hepatocellular carcinoma. <i>J Cancer Res Clin Oncol</i> 2010;136(11):1633-40 doi: 10.1007/s00432-010-0821-zpublished Online First. | Transplantation Proceedings                         | 2015 | Livers | DD | 53  | 2009/1 | 2014/8  | No  |                                                                                                                                                                                                                                                                                                                                                                                                                                                                                                                                                                                    | No  |                                                                                                                                                                                                                                                                                    | 0   |
| 114 | Li C, Zhu WJ, Wen TF, et al. Child-Pugh A Hepatitis B-Related Cirrhotic Patients with a Single Hepatocellular Carcinoma Up to 5 cm: Liver Transplantation vs. Resection. <i>J Gastrointest Surg</i> 2014;18(8):1469-76 doi: 10.1007/s11605-014-2550-0published Online First.                                     | Journal of Cancer Research and Clinical Oncology    | 2010 | Livers | DD | 8   | 2006/7 | 2009/12 | Yes | All patients gave written informed consent before beginning the study and being assigned to treatment groups.                                                                                                                                                                                                                                                                                                                                                                                                                                                                      | No  |                                                                                                                                                                                                                                                                                    | 0   |
| 115 | Li D, Lu T, Shen C, et al. Expression of fibroblast growth factor 21 in patients with biliary atresia. <i>Cytokine</i> 2016;83:13-18 Online First.                                                                                                                                                               | Journal of Gastrointestinal Surgery                 | 2014 | Livers | DD | 39  | 2007/1 | 2012/12 | Yes | All transplantations and this study itself were approved by the ethical committee of West China Hospital.                                                                                                                                                                                                                                                                                                                                                                                                                                                                          | No  |                                                                                                                                                                                                                                                                                    | 0   |

|     | A                                                                                                                                                                                                                                                                                                                                | B                                                       | C    | D      | E  | F   | G       | H       | I   | J                                                                                                                                                                                                                                                                                                                                                                                                                                                                                          | K   | L                                                                                                                                                                              | M   |
|-----|----------------------------------------------------------------------------------------------------------------------------------------------------------------------------------------------------------------------------------------------------------------------------------------------------------------------------------|---------------------------------------------------------|------|--------|----|-----|---------|---------|-----|--------------------------------------------------------------------------------------------------------------------------------------------------------------------------------------------------------------------------------------------------------------------------------------------------------------------------------------------------------------------------------------------------------------------------------------------------------------------------------------------|-----|--------------------------------------------------------------------------------------------------------------------------------------------------------------------------------|-----|
| 116 | Li D, Lu W, Zhu JY, et al. Population pharmacokinetics of tacrolimus and CYP3A5, MDR1 and IL-10 polymorphisms in adult liver transplant patients. <i>J Clin Pharm Ther</i> 2007;32(5):505-15 doi: 10.1111/j.1365-2710.2007.00850.xpublished Online First.                                                                        | Cytokine                                                | 2016 | Livers |    | 15  | 2014/1  | 2014/12 | Yes | Written informed consent was obtained in each case before enrollment (signed by the parents of each infant). This study was approved by the Research Ethics Committee of the Ren Ji Hospital, School of Medicine, Shanghai JiaoTong University.                                                                                                                                                                                                                                            | No  | Hepatic tissues obtained from Spediatric cardiac death donors (DCD) without liver disease served as the control.                                                               | DCD |
| 117 | Li D, Zhu JY, Gao J, et al. Polymorphisms of tumor necrosis factor- $\gamma$ , interleukin-10, cytochrome P450 3A5 and ABCB1 in Chinese liver transplant patients treated with immunosuppressant tacrolimus. <i>Clin Chim Acta</i> 2007;383(1-2):133-39 doi: 10.1016/j.cca.2007.05.008published Online First.                    | Journal of Clinical Pharmacy and Therapeutics           | 2007 | Livers | DD | 104 | 2004/7  | 2006/8  | Yes | The study was conducted in accordance with the Declaration of Helsinki and its amendments and was approved by the Ethics Committee of Beijing (Peking) University. All subjects gave their written informed consents.                                                                                                                                                                                                                                                                      | No  |                                                                                                                                                                                | 0   |
| 118 | Li F, Yang M, Li B, et al. Initial clinical results of orthotopic liver transplantation for hepatic alveolar echinococcosis. <i>Liver Transpl</i> 2007;13(6):924-26 doi: 10.1002/lt.21187published Online First.                                                                                                                 | Clinica Chimica Acta                                    | 2007 | Livers |    | 70  | 2004/7  | 2006/7  | Yes | The study was conducted in accordance with the Declaration of Helsinki and its amendments and was approved by the Ethics Committee of Beijing University. All subjects gave their written informed consents.                                                                                                                                                                                                                                                                               | No  |                                                                                                                                                                                | 0   |
| 119 | Li H, He JW, Fu BS, et al. Immunosuppressant-related hip pain after orthotopic liver transplant. <i>Exp Clin Transplant</i> 2013;11(1):32-38 doi: 10.6002/ect.2012.0026published Online First.                                                                                                                                   | Liver Transplantation                                   | 2007 | Livers |    | 7   | 2001/4  | 2006/4  | Yes | All 7 donated liver grafts were made voluntarily and were approved by the medical ethics committee of West China Hospital, Sichuan University, China.                                                                                                                                                                                                                                                                                                                                      | Yes | All 7 donated liver grafts were made voluntarily                                                                                                                               | 0   |
| 120 | Li H, Li B, Wei Y, et al. Preoperative transarterial chemoembolization does not increase hepatic artery complications after liver transplantation: A single center 12-year experience. <i>Clinics and Research in Hepatology and Gastroenterology</i> 2015;39(4):451-57 doi: 10.1016/j.clinre.2014.12.004published Online First. | Experimental and Clinical Transplantation               | 2013 | Livers |    | 175 | 2004/1  | 2007/12 | Yes | The study protocol was approved by the University Ethics Committee and has been performed in accordance with the ethical standards put forth in the 2000 Declaration of Helsinki as well as the Declaration of Istanbul 2008. The use of the transplanted organs was approved by the ethics Committee of the Third Affiliated Hospital of Sun Yat-sen University, all organ donations were voluntary, and all donors and/or their next of kin provided written consent for organ donation. | Yes | All organ donations were voluntary, and all donors and/or their next of kin provided written consent for organ donation.                                                       | 0   |
| 121 | Li H, Li J, Wang Y, et al. Proteomic analysis of effluents from perfused human heart for transplantation: Identification of potential biomarkers for ischemic heart damage. <i>Proteome Science</i> 2012;10(1) doi: 10.1186/1477-5956-10-21published Online First.                                                               | Clinics and Research in Hepatology and Gastroenterology | 2015 | Livers |    | 450 | 2001/1  | 2013/12 | No  |                                                                                                                                                                                                                                                                                                                                                                                                                                                                                            | No  |                                                                                                                                                                                | 0   |
| 122 | Li H, Wang S, Wang G, et al. Yes-associated protein expression is a predictive marker for recurrence of hepatocellular carcinoma after liver transplantation. <i>Dig Surg</i> 2014;31(6):468-78 doi: 10.1159/000370252published Online First.                                                                                    | Proteome Science                                        | 2012 | Hearts | DD | 5   | 0       | 0       | Yes | The study protocol was approved by the Ethics review board of the Third Military Medical University.                                                                                                                                                                                                                                                                                                                                                                                       | Yes | Five donors were brain dead due to car accident, their respiration was maintained by mechanical ventilation and hemodynamics was stabilized by minimum doses of catecholamine. | DBD |
| 123 | Li H, Xie HY, Zhou L, et al. Copy number variation in CCL3L1 gene is associated with susceptibility to acute rejection in patients after liver transplantation. <i>Clin Transplant</i> 2012;26(2):314-21 doi: 10.1111/j.1399-0012.2011.01486.xpublished Online First.                                                            | Digestive Surgery                                       | 2014 | Livers |    | 105 | 2004/6  | 2009/9  | Yes | The present study was approved by our institutional ethics committee. Informed consent was obtained from each patient and family members. The procedure met all applicable guidelines of our institute as well as governmental regulations concerning the ethical use of donated organs, and the latest version of the Declaration of Helsinki.                                                                                                                                            | No  |                                                                                                                                                                                | 0   |
| 124 | Li H, Xie HY, Zhou L, et al. Lack of association of the polymorphism of the CCR5 gene in liver recipients with acute rejection from China. <i>Exp Clin Transplant</i> 2011;9(4):252-57 Online First.                                                                                                                             | Clinical Transplantation                                | 2012 | Livers |    | 266 | 2006/1  | 2009/3  | Yes | This study was approved by the Ethical Review Committee of the First Affiliated Hospital, School of Medicine, and written informed consent was obtained from all patients.                                                                                                                                                                                                                                                                                                                 | No  |                                                                                                                                                                                | 0   |
| 125 | Li H, Yang S, Chen H, et al. Survival after heart transplantation for non-metastatic primary cardiac sarcoma. <i>J Cardiothorac Surg</i> 2016;11(1):145 Online First.                                                                                                                                                            | Experimental and Clinical Transplantation               | 2011 | Livers | DD | 185 | 2006/1  | 2009/3  | Yes | This study was approved by the Ethical Review Committee of the First Affiliated Hospital, School of Medicine; written, informed consent was obtained from all patients, and the study protocol adhered to the Declaration of Helsinki                                                                                                                                                                                                                                                      | No  |                                                                                                                                                                                | 0   |
| 126 | Li J, Bai Y, Wang L, et al. Regulatory Effect of FK506 on CD152 and PD-1 in the Liver Alloreipients. <i>Transplant Proc</i> 2008;40(5):1495-97 Online First.                                                                                                                                                                     | Journal of Cardiothoracic Surgery                       | 2016 | Hearts | DD | 6   | 2008    | 2011    | Yes | This study protocol adheres to the principles of the Declaration of Helsinki and has been approved by the Medical Ethics Committee of Zhongshan Hospital Affiliated to Fudan University.                                                                                                                                                                                                                                                                                                   | No  |                                                                                                                                                                                | 0   |
| 127 | Li J, Liu B, Yan LN, et al. Reversal of graft steatosis after liver transplantation: prospective study. <i>Transplant Proc</i> 2009;41(9):3560-63 doi: 10.1016/j.transproceed.2009.06.222published Online First.                                                                                                                 | Transplantation Proceedings                             | 2008 | Livers |    | 22  | 2006/11 | 2007/3  | No  |                                                                                                                                                                                                                                                                                                                                                                                                                                                                                            | No  |                                                                                                                                                                                | 0   |



|     | A                                                                                                                                                                                                                                                                                                | B                                                              | C    | D      | E  | F            | G       | H       | I   | J                                                                                                                                                                                                                                                                                                                                                                                                                                                                                                                                                                     | K   | L                                                                                                                       | M   |
|-----|--------------------------------------------------------------------------------------------------------------------------------------------------------------------------------------------------------------------------------------------------------------------------------------------------|----------------------------------------------------------------|------|--------|----|--------------|---------|---------|-----|-----------------------------------------------------------------------------------------------------------------------------------------------------------------------------------------------------------------------------------------------------------------------------------------------------------------------------------------------------------------------------------------------------------------------------------------------------------------------------------------------------------------------------------------------------------------------|-----|-------------------------------------------------------------------------------------------------------------------------|-----|
| 128 | Li MR, Chen GH, Cai CJ, et al. High hepatitis B virus DNA level in serum before liver transplantation increases the risk of hepatocellular carcinoma recurrence. <i>Digestion</i> 2011;84(2):134-41 doi: 10.1159/000324197published Online First.                                                | Transplantation Proceedings                                    | 2009 | Livers | DD | 73           | 2003/7  | 2008/2  | Yes | The study was approved by our ethics committee, and all recipients gave written informed consent to receive a steatotic liver graft.                                                                                                                                                                                                                                                                                                                                                                                                                                  | Yes | No prisoners were used in the study, and all deceased donors met the criteria for brain death.                          | DBD |
| 129 | Li N, Zhou J, Weng D, et al. Adjuvant adenovirus-mediated delivery of herpes simplex virus thymidine kinase administration improves outcome of liver transplantation in patients with advanced hepatocellular carcinoma. <i>Clin Cancer Res</i> 2007;13(19):5847-54 Online First.                | <i>Digestion</i>                                               | 2011 | Livers |    | 322          | 2004/1  | 2009/1  | No  |                                                                                                                                                                                                                                                                                                                                                                                                                                                                                                                                                                       | No  |                                                                                                                         | 0   |
| 130 | Li Q, Yao G, Ge Q, et al. Relevant risk factors affecting time of ventilation during early postoperative period after orthotopic liver transplantation. <i>J Crit Care</i> 2010;25(2):221-24 doi: 10.1016/j.jccr.2009.06.048published Online First.                                              | <i>Clinical Cancer Research</i>                                | 2007 | Livers |    | 45           | 2000/9  | 2006/10 | Yes | The study was conducted in accordance with the Declaration of Helsinki. All patients provided written, informed consent. The study was approved by the local ethics committee.                                                                                                                                                                                                                                                                                                                                                                                        | No  |                                                                                                                         | 0   |
| 131 | Li QY, Qin YS, Ling Q, et al. No therapeutic ERCP in anastomotic stricture without intrahepatic biliary dilation after liver transplantation. <i>Hepatogastroenterology</i> 2011;58(109):1127-31 doi: 10.5754/hge11268published Online First.                                                    | <i>Journal of Critical Care</i>                                | 2010 | Livers |    | 96           | 2004/8  | 2006/5  | No  |                                                                                                                                                                                                                                                                                                                                                                                                                                                                                                                                                                       | No  |                                                                                                                         | 0   |
| 132 | Li RD, Sun Z, Dong JY, et al. A quantitative assessment model of T-cell immune function for predicting risks of infection and rejection during the early stage after liver transplantation. <i>Clin Transplant</i> 2013;27(5):666-72 doi: 10.1111/ctr.12187published Online First.               | <i>Hepato-Gastroenterology</i>                                 | 2011 | Livers | DD | 592          | 2004/5  | 2010/6  | Yes | Each organ donation or transplant in our center was strictly under the guideline of the Ethical Committee of our hospital, the regulation of Organ Transplant Committee of Zhejiang province and the declaration of Helsinki                                                                                                                                                                                                                                                                                                                                          | No  |                                                                                                                         | 0   |
| 133 | Li T, Chen ZS, Zeng FJ, et al. Impact of early biliary complications in liver transplantation in the presence or absence of a T-tube: A Chinese transplant centre experience. <i>Postgrad Med J</i> 2007;83(976):120-23 doi: 10.1136/pgmj.2006.049171published Online First.                     | <i>Clinical Transplantation</i>                                | 2013 | Livers |    | 194          | 2009    | 2010    | Yes | All persons have given their informed consent prior to their inclusion in the study, and all human studies have been approved by China Ethics Committee and performed in accordance with the ethical standards... Informed consent in writing was obtained from each patient. Each liver donation and transplantation in our hospital was approved by the Medical Ethics Committee of Changzheng Hospital, and the study protocol conformed to the ethical guidelines of the 1975 Declaration of Helsinki. None of the data obtained were used for clinical decision. | No  | Included in this study were patients who received liver transplantation from heart-beating donors between 2009 and 2010 | 0   |
| 134 | Li W, Yuan G, Liu H, et al. Comparison of HPLC-MS/MS and enzyme-multiplied immunoassay in tacrolimus determination and its application in therapeutic drug monitoring. <i>Latin American Journal of Pharmacy</i> 2015;34(8):1540-46 Online First.                                                | <i>Postgraduate Medical Journal</i>                            | 2007 | Livers | DD | 84           | 2002/11 | 2005/6  | No  |                                                                                                                                                                                                                                                                                                                                                                                                                                                                                                                                                                       | No  |                                                                                                                         | 0   |
| 135 | Li WX, Li Z, Gao PJ, et al. Histological differentiation predicts post-liver transplantation survival time. <i>Clinics and Research in Hepatology and Gastroenterology</i> 2014;38(2):201-08 doi: 10.1016/j.clinre.2013.11.002published Online First.                                            | <i>Latin American Journal of Pharmacy</i>                      | 2015 | Livers |    | not specific | 0       | 0       | No  |                                                                                                                                                                                                                                                                                                                                                                                                                                                                                                                                                                       | No  |                                                                                                                         | 0   |
| 136 | Li X, Chi X, Luo G, et al. Ulinastatin ameliorates acute kidney injury following liver transplantation in rats and humans. <i>Exp Ther Med</i> 2015;9(2):411-16 Online First.                                                                                                                    | <i>Clinics and Research in Hepatology and Gastroenterology</i> | 2014 | Livers | DD | 107          | 2002    | 2011    | Yes | Informed consent was obtained from all subjects for participation in the study, and the study was approved by the institutional ethics committee. The deceased donor livers were obtained through both social and legal donation.                                                                                                                                                                                                                                                                                                                                     | Yes | The deceased donor livers were obtained through both social and legal donation.                                         | 0   |
| 137 | Li X, Li X, Chi X, et al. Ulinastatin ameliorates acute kidney injury following liver transplantation in rats and humans. <i>Exp Ther Med</i> 2015;9(2):411-16 doi: 10.3892/etm.2014.2088published Online First.                                                                                 | <i>Experimental and Therapeutic Medicine</i>                   | 2015 | Livers |    | 60           | 0       | 0       | Yes | Informed consent was obtained from all the individuals enrolled in the study, and the experimental protocol was approved by the Ethics Committee of the Third Affiliated Hospital of Sun Yat-sen University                                                                                                                                                                                                                                                                                                                                                           | No  |                                                                                                                         | 0   |
| 138 | Li Y, Shi Y, Chen J, et al. Association of polymorphisms in interleukin-18 and interleukin-28b with hepatitis b recurrence after liver transplantation in chinese han population. <i>Int J Immunogenet</i> 2012;39(4):346-52 doi: 10.1111/j.1744-313X.2012.01097.xpublished Online First.        | <i>Experimental and Therapeutic Medicine</i>                   | 2015 | Livers |    | 60           | 0       | 0       | Yes | Informed consent was obtained from all the individuals enrolled in the study, and the experimental protocol was approved by the Ethics Committee of the Third Affiliated Hospital of Sun Yat-sen University                                                                                                                                                                                                                                                                                                                                                           | No  |                                                                                                                         | 0   |
| 139 | Li Y, Zhu M, Xia Q, et al. Urinary neutrophil gelatinase-associated lipocalin and L-type fatty acid binding protein as diagnostic markers of early acute kidney injury after liver transplantation. <i>Biomarkers</i> 2012;17(4):336-42 doi: 10.3109/1354750X.2012.672458published Online First. | <i>International Journal of Immunogenetics</i>                 | 2012 | Livers |    | 200          | 2000/4  | 2011/3  | Yes | All the liver transplantation patients volunteered for the study and given written informed consent. This study was approved by the West China Hospital.                                                                                                                                                                                                                                                                                                                                                                                                              | No  |                                                                                                                         | 0   |

|     | A                                                                                                                                                                                                                                                                                                               | B                                                           | C    | D      | E  | F   | G       | H       | I   | J                                                                                                                                                                                                                                                                                                                                                                                                                       | K   | L                                                                                                                                                                | M |
|-----|-----------------------------------------------------------------------------------------------------------------------------------------------------------------------------------------------------------------------------------------------------------------------------------------------------------------|-------------------------------------------------------------|------|--------|----|-----|---------|---------|-----|-------------------------------------------------------------------------------------------------------------------------------------------------------------------------------------------------------------------------------------------------------------------------------------------------------------------------------------------------------------------------------------------------------------------------|-----|------------------------------------------------------------------------------------------------------------------------------------------------------------------|---|
| 140 | Li Y, Zou Y, Cai B, et al. The associations of IL-18 serum levels and promoter polymorphism with tacrolimus pharmacokinetics and hepatic allograft dysfunction in Chinese liver transplantation recipients. <i>Gene</i> 2012;491(2):251-55 doi: 10.1016/j.gene.2011.10.008published Online First.               | Biomarkers                                                  | 2012 | Livers | DD | 11  | 2007/12 | 2008/12 | Yes | After the study was approved by the Ethics Committee at the Shanghai Jiaotong University, informed consent was obtained from all patients participating in this study.                                                                                                                                                                                                                                                  | No  |                                                                                                                                                                  | 0 |
| 141 | Liang TB, Bai XL, Li DL, et al. Early Postoperative hemorrhage requiring urgent surgical reintervention after orthotopic liver transplantation. <i>Transplant Proc</i> 2007;39(5):1549-53 doi: 10.1016/j.transproceed.2007.01.080published Online First.                                                        | Gene                                                        | 2012 | Livers |    | 155 | 2000/4  | 2008/3  | Yes | All liver transplantation recipients volunteered for the study and gave written informed consent. This study was approved by the West China hospital.                                                                                                                                                                                                                                                                   | No  |                                                                                                                                                                  | 0 |
| 142 | Liang TB, Li DL, Liang L, et al. Intraoperative blood salvage during liver transplantation in patients with hepatocellular carcinoma: Efficiency of leukocyte depletion filters in the removal of tumor cells. <i>Transplantation</i> 2008;85(6):863-69 doi: 10.1097/TP.0b013e3181671f2epublished Online First. | Transplantation Proceedings                                 | 2007 | Livers |    | 261 | 2003/1  | 2005/12 | No  |                                                                                                                                                                                                                                                                                                                                                                                                                         | No  |                                                                                                                                                                  | 0 |
| 143 | Liang TB, Li JJ, Li DL, et al. Intraoperative blood salvage and leukocyte depletion during liver transplantation with bacterial contamination. <i>Clin Transplant</i> 2010;24(2):265-72 doi: 10.1111/j.1399-0012.2009.01091.xpublished Online First.                                                            | Transplantation                                             | 2008 | Livers |    | 37  | 2006/1  | 2006/12 | Yes | The clinical study protocol was approved by the Ethics Committee of the Zhejiang Province and each patient was provided with informed consent                                                                                                                                                                                                                                                                           | No  |                                                                                                                                                                  | 0 |
| 144 | Lianghui G, Shusen Z, Tingbo L, et al. Deferred versus prophylactic therapy with gancyclovir for cytomegalovirus in allograft liver transplantation. <i>Transplant Proc</i> 2004;36(5):1502-05 doi: 10.1016/j.transproceed.2004.04.079published Online First.                                                   | Clinical Transplantation                                    | 2010 | Livers |    | 45  | 2005/12 | 2006/10 | Yes | Because of the informed consent and ethics approval from the local Ethics Committee, all patients were aware of the procedure and knew that the salvaged blood was to be used for research purposes                                                                                                                                                                                                                     | No  |                                                                                                                                                                  | 0 |
| 145 | Lin B, Geng L, Zheng Z, et al. The predictive value of blood neutrophil-lymphocyte ratio in patients with end-stage liver cirrhosis following ABO-incompatible liver transplantation. <i>J Res Med Sci</i> 2016;21(5):20-25 Online First.                                                                       | Transplantation Proceedings                                 | 2004 | Livers |    | 89  | 1999/1  | 2003/6  | No  |                                                                                                                                                                                                                                                                                                                                                                                                                         | No  |                                                                                                                                                                  | 0 |
| 146 | Lin MJ, Yang YL, Yu Q, et al. Value of percutaneous transhepatic cholangioscopy in the treatment of biliary cast after liver transplantation. <i>Int J Clin Exp Med</i> 2016;9(2):1263-71 Online First.                                                                                                         | Journal of Research in Medical Sciences                     | 2016 | Livers |    | 84  | 2004/1  | 2011/12 | Yes | All LT were performed following obtaining informed consent from all patients, and this study was approved by the Ethical Review Board of the first affiliated hospital of the medical school of Zhejiang University                                                                                                                                                                                                     | Yes | In this study, all of the voluntary donor livers come from the accidentally dead people, so we were not sure the blood type pairs of LT before the operation. In | 0 |
| 147 | Lin XH, Teng S, Wang L, et al. Fatigue and its associated factors in liver transplant recipients in Beijing: A cross-sectional study. <i>BMJ Open</i> 2017;7(2) Online First.                                                                                                                                   | International Journal of Clinical and Experimental Medicine | 2016 | Livers |    | 17  | 2008/4  | 2013/1  | Yes | This study was conducted in accordance with the declaration of Helsinki and the approval from the Ethics Committee of Dalian University. Written informed consent was obtained from each participant                                                                                                                                                                                                                    | No  |                                                                                                                                                                  | 0 |
| 148 | Lin YH, Cai ZS, Jiang Y, et al. Perioperative risk factors for pulmonary complications after liver transplantation. <i>J Int Med Res</i> 2010;38(5):1845-55 Online First.                                                                                                                                       | BMJ Open                                                    | 2017 | Livers | DD | 281 | 0       | 0       | Yes | Ethical approval had been obtained from the hospital and university ethics committee, which requires processes to ensure the confidentiality of all data. The purpose, risks and benefits of this study were explained to the patients before they were asked to participate. The patients were assured that participation was voluntary, and that choosing not to participate would not influence their clinical care. | Yes | The organ transplant donors involved in our study were not from a vulnerable population and they were informed and voluntary to donate their organ               | 0 |
| 149 | Ling L, He X, Zeng J, et al. In-hospital cerebrovascular complications following orthotopic liver transplantation: a retrospective study. <i>BMC Neurol</i> 2008;8:52 Online First.                                                                                                                             | Journal of International Medical Research                   | 2010 | Livers |    | 107 | 2007/4  | 2009/3  | Yes | The Clinical Research and Ethics Committee of Fuzong Clinical College, Fujian Medical University, approved all operations and written informed consent to operate was obtained from all patients in accordance with the Declaration of Helsinki.                                                                                                                                                                        | No  |                                                                                                                                                                  | 0 |
| 150 | Ling Q, Xie H, Li J, et al. Donor Graft MicroRNAs: A Newly Identified Player in the Development of New-onset Diabetes After Liver Transplantation. <i>Am J Transplant</i> 2017;17(1):255-64 Online First.                                                                                                       | BMC neurology                                               | 2008 | Livers |    | 337 | 1996/1  | 2005/6  | Yes | The research protocol was approved by the local ethical committee for clinical research and all procedures involving the participant were conducted according to institutional guidelines in compliance with the regulations. Both oral and written informed consents were obtained from the patients or their families.                                                                                                | No  |                                                                                                                                                                  | 0 |

|     | A                                                                                                                                                                                                                                                                                                           | B                                          | C    | D      | E  | F   | G       | H       | I   | J                                                                                                                                                                                                                                                                                                                                                                                                                                                      | K   | L                                                           | M   |
|-----|-------------------------------------------------------------------------------------------------------------------------------------------------------------------------------------------------------------------------------------------------------------------------------------------------------------|--------------------------------------------|------|--------|----|-----|---------|---------|-----|--------------------------------------------------------------------------------------------------------------------------------------------------------------------------------------------------------------------------------------------------------------------------------------------------------------------------------------------------------------------------------------------------------------------------------------------------------|-----|-------------------------------------------------------------|-----|
| 151 | Ling Q, Xie H, Lu D, et al. Association between donor and recipient TCF7L2 gene polymorphisms and the risk of new-onset diabetes mellitus after liver transplantation in a Han Chinese population. <i>J Hepatol</i> 2013;58(2):271-77 doi: 10.1016/j.jhep.2012.09.025 published Online First.               | American Journal of Transplantation        | 2017 | Livers |    | 213 | 2011/9  | 2014/12 | Yes | This study was approved by the Institutional Review Board of First Affiliated Hospital at Zhejiang University following the guidelines of the Declaration of Helsinki. Informed consent was obtained.                                                                                                                                                                                                                                                  | Yes | No donor livers were recovered from executed prisoners.     | OT  |
| 152 | Ling Q, Xu X, Li J, et al. A new serum cystatin C-based equation for assessing glomerular filtration rate in liver transplantation. <i>Clin Chem Lab Med</i> 2008;46(3):405-10 doi: 10.1515/CCLM.2008.052 published Online First.                                                                           | Journal of Hepatology                      | 2013 | Livers |    | 125 | 2006/11 | 2009/7  | Yes | Informed consent was obtained from all donors and recipients. Each organ donation or transplant was approved by the Institutional Review Board, First Affiliated Hospital, Zhejiang University, strictly under the guidelines of the Ethics Committee of the hospital, the current regulation of the Chinese Government, and the Declaration of Helsinki. No donor livers were harvested from executed prisoners                                       | Yes | No donor livers were harvested from executed prisoners      | 0   |
| 153 | Ling Q, Xu X, Wang K, et al. Donor PPAR? Gene polymorphisms influence the susceptibility to glucose and lipid disorders in liver transplant recipients. <i>medicine (United States)</i> 2015;94(35):e1421 doi: 10.1097/MD.0000000000001421 published Online First.                                          | Clinical Chemistry and Laboratory Medicine | 2008 | Livers | DD | 60  | 2006/6  | 2007/1  | Yes | Informed consent was obtained from all donors and recipients before transplantation. Organ donation for transplantation was approved by the Organ Transplant Committee of Zhejiang.                                                                                                                                                                                                                                                                    | No  |                                                             | 0   |
| 154 | Ling Q, Xu X, Wei Q, et al. Downgrading MELD improves the outcomes after liver transplantation in patients with acute-on-chronic hepatitis B liver failure. <i>PLoS One</i> 2012;7(1) doi: 10.1371/journal.pone.0030322 published Online First.                                                             | Medicine (United States)                   | 2015 | Livers | DD | 176 | 2010/1  | 2012/10 | Yes | This study was approved by our Institutional Review Board of our hospital, the current regulation of the Chinese Government, and the Declaration of Helsinki. All authors had access to the study data and had reviewed and approved the final manuscript. Written informed consents were obtained.                                                                                                                                                    | Yes | No donor organs were obtained from executed prisoners       | 0   |
| 155 | Ling Q, Xu X, Wei Q, et al. Impact of preexisting diabetes mellitus on outcome after liver transplantation in patients with hepatitis B virus-related liver disease. <i>Dig Dis Sci</i> 2011;56(3):889-93 doi: 10.1007/s10620-010-1358-3 published Online First.                                            | PLoS ONE                                   | 2012 | Livers |    | 189 | 2001/1  | 2010/6  | Yes | Informed consent was obtained from all donors and recipients before LT. Each organ donation or transplant in our centre was strictly selected according to the guidelines of the Ethical Committee of our hospital, the regulation of Organ Transplant Committee of Zhejiang province and the Declaration of Helsinki. ... The study protocol was approved by the Ethics Committee, and written informed consent was obtained from all study patients. | No  |                                                             | 0   |
| 156 | Liu B, Teng F, Fu H, et al. Excessive intraoperative blood loss independently predicts recurrence of hepatocellular carcinoma after liver transplantation. <i>BMC Gastroenterol</i> 2015;15(1) doi: 10.1186/s12876-015-0364-5 published Online First.                                                       | Digestive Diseases and Sciences            | 2011 | Livers | DD | 48  | 2003/9  | 2007/5  | Yes | Informed consent was obtained from each patient before transplantation. Each organ donation or transplant was strictly under the guidelines of the Ethical Committee of the Hospital and the Declaration of Helsinki.                                                                                                                                                                                                                                  | No  |                                                             | 0   |
| 157 | Liu C, Shang YF, Zhang XF, et al. Co-administration of grapefruit juice increases bioavailability of tacrolimus in liver transplant patients: A prospective study. <i>Eur J Clin Pharmacol</i> 2009;65(9):881-85 doi: 10.1007/s00228-009-0702-z published Online First.                                     | BMC Gastroenterology                       | 2015 | Livers | DD | 479 | 2001/1  | 2012/12 | Yes | This study was approved by the Research Ethics Committee of Changzheng Hospital, Shanghai and written informed consents were obtained from all the participants.                                                                                                                                                                                                                                                                                       | No  |                                                             | 0   |
| 158 | Liu C, Tsai HL, Chin T, et al. Experience of surgical treatment for hepatoblastoma. <i>Formosan Journal of Surgery</i> 2016;49(2):56-62 Online First.                                                                                                                                                       | European Journal of Clinical Pharmacology  | 2009 | Livers |    | 30  | 2000    | 2006    | Yes | After the study had received the approval of the local Ethics Committee of Xi'an Jiaotong University and their informed written consent of the patients                                                                                                                                                                                                                                                                                                | No  |                                                             | 0   |
| 159 | Liu CZ, Hu SY, Jin B, et al. Hemodialysis-induced hyperglycemia after liver transplantation. <i>Hepatogastroenterology</i> 2008;55(88):2175-77 Online First.                                                                                                                                                | Formosan Journal of Surgery                | 2016 | Livers | DD | 213 | 2011/9  | 2014/12 | Yes | This study was approved by the Institutional Review Board, the First Affiliated Hospital, Zhejiang University, under the guidelines of the Declaration of Helsinki. Informed consent was obtained. No donor livers were harvested from the executed prisoners.                                                                                                                                                                                         | Yes | No donor livers were harvested from the executed prisoners. | DCD |
| 160 | Liu D, Huang P, Li X, et al. Using inflammatory and oxidative biomarkers in urine to predict early acute kidney injury in patients undergoing liver transplantation. <i>Biomarkers</i> 2014;19(5):424-29 doi: 10.3109/1354750X.2014.924997 published Online First.                                          | Hepato-Gastroenterology                    | 2008 | Livers |    | 5   | 0       | 0       | Yes | After obtaining Institutional Review Board approval, ...                                                                                                                                                                                                                                                                                                                                                                                               | No  |                                                             | 0   |
| 161 | Liu D, Luo G, Luo C, et al. Changes in the concentrations of mediators of inflammation and oxidative stress in exhaled breath condensate during liver transplantation and their relations with postoperative ARDS. <i>Respir Care</i> 2015;60(5):679-88 doi: 10.4187/respcare.03311 published Online First. | Biomarkers                                 | 2014 | Livers | DD | 28  | 0       | 0       | Yes | All study enrolment and subsequent data collection and acquisition procedures were approved by the Research Committee of third Affiliated Hospital of Sun Yat-Sen University.                                                                                                                                                                                                                                                                          | No  |                                                             | OT  |

|     | A                                                                                                                                                                                                                                                                                              | B                                 | C    | D      | E  | F    | G      | H       | I   | J                                                                                                                                                                                                                                                                                                                                                                                                                                                                                                                                                                                                                                                                                                     | K   | L                                                                                                                                                                  | M    |
|-----|------------------------------------------------------------------------------------------------------------------------------------------------------------------------------------------------------------------------------------------------------------------------------------------------|-----------------------------------|------|--------|----|------|--------|---------|-----|-------------------------------------------------------------------------------------------------------------------------------------------------------------------------------------------------------------------------------------------------------------------------------------------------------------------------------------------------------------------------------------------------------------------------------------------------------------------------------------------------------------------------------------------------------------------------------------------------------------------------------------------------------------------------------------------------------|-----|--------------------------------------------------------------------------------------------------------------------------------------------------------------------|------|
| 162 | Liu J, Yan J, Wan Q, et al. The risk factors for tuberculosis in liver or kidney transplant recipients. BMC Infect Dis 2014;14(1) doi: 10.1186/1471-2334-14-387published Online First.                                                                                                         | Respiratory Care                  | 2015 | Livers |    | 28   | 0      | 0       | Yes | This study was approved by the Research Committee of the Third Affiliated Hospital of Sun Yat-Sen University                                                                                                                                                                                                                                                                                                                                                                                                                                                                                                                                                                                          | No  |                                                                                                                                                                    | 0    |
| 163 | Liu S, Bai Y, Huang J, et al. Do mitochondria contribute to left ventricular non-compaction cardiomyopathy? New findings from myocardium of patients with left ventricular non-compaction cardiomyopathy. Mol Genet Metab 2013;109(1):100-06 Online First.                                     | BMC Infectious Diseases           | 2014 | Livers | DD | 4    | 2000/1 | 2013/8  | Yes | The study protocol, which included participants providing written consent prior to the study, was approved by the Third Xiangya Hospital, Central South University, Medical Ethical Committee                                                                                                                                                                                                                                                                                                                                                                                                                                                                                                         | No  |                                                                                                                                                                    | OT   |
| 164 | Liu S, Fan J, Wang X, et al. Intraoperative cryoprecipitate transfusion and its association with the incidence of biliary complications after liver transplantation—a retrospective cohort study. PLoS One 2013;8(5) doi: 10.1371/journal.pone.0060727published Online First.                  | Molecular Genetics and Metabolism | 2013 | Hearts | DD | 6    | 0      | 0       | Yes | All participants gave informed written consent for this investigation, which was approved by the Institutional Ethical Review Board of Fuwai Hospital (Beijing, China). The investigation conforms to the principles outlined in the Declaration of Helsinki                                                                                                                                                                                                                                                                                                                                                                                                                                          | Yes | Normal control hearts came from autopsies or donors with no history of heart disease who died in accidents.                                                        | 0    |
| 165 | Liu S, Wang X, Lu Y, et al. The effects of intraoperative cryoprecipitate transfusion on acute renal failure following orthotopic liver transplantation. Hepatology International 2013;7(3):901-09 doi: 10.1007/s12072-013-9457-9published Online First.                                       | PLoS ONE                          | 2013 | Livers | DD | 356  | 2005/1 | 2010/12 | Yes | National legislation and the ethical committee of Shanghai First People's Hospital approved this retrospective study                                                                                                                                                                                                                                                                                                                                                                                                                                                                                                                                                                                  | No  |                                                                                                                                                                    | DCD  |
| 166 | Liu S, Xing T, Sheng T, et al. The reduction rate of serum C3 following liver transplantation is an effective predictor of non-anastomotic strictures. Hepatology International 2014;8(2):293-300 doi: 10.1007/s12072-014-9524-xpublished Online First.                                        | Hepatology International          | 2013 | Livers | DD | 389  | 2003/1 | 2010/12 | Yes | National legislation and the ethics committee of Shanghai First People's Hospital approved this retrospective study. ALSO extended and somewhat nonsensical ethics statement at end of article: Compliance with Ethics Requirements All procedures followed were in accordance with the ethical standards of the responsible committee on human experimentation (institutional and national) and with the Helsinki Declaration of 1975, as revised in 2008. Due to the retrospective nature of the study, this article did not involve any studies with human or animal subjects. National legislation and the ethics committee of Shanghai First People's Hospital approved this retrospective study | No  |                                                                                                                                                                    | 0    |
| 167 | Liu X, Wang B, Zhang X, et al. Liver transplantation using donation after brain and cardiac death: a single-center experience in China. Transplant Proc 2016;48(6):1879-86 Online First.                                                                                                       | Hepatology International          | 2014 | Livers | DD | 232  | 2007/1 | 2011/12 | No  |                                                                                                                                                                                                                                                                                                                                                                                                                                                                                                                                                                                                                                                                                                       | No  |                                                                                                                                                                    | DCD  |
| 168 | Liu XX, Xu BM, Chen H, et al. limited sampling strategy for the estimation of tacrolimus area under the concentration-time curve in Chinese adult liver transplant patients. Pharmacology 2016;98(5-6):229-41 doi: 10.1159/000445896published Online First.                                    | Transplantation Proceedings       | 2016 | Livers | DD | 102  | 2010/3 | 2014/12 | Yes | The study protocol was approved by the Institutional Review Board/Ethics of The First Affiliated Hospital of Xi'an Jiaotong University and was consistent with the Declaration of Helsinki.                                                                                                                                                                                                                                                                                                                                                                                                                                                                                                           | Yes | All the DBCD grafts were procured under controlled condition. Detailed information of the DBCD donors was obtained from The Chinese Red Cross and the OPO records. | DBCD |
| 169 | Liu Y, Liu YY, Li CP, et al. Comprehensive comparison of three different immunosuppressive regimens for liver transplant patients with hepatocellular carcinoma: Steroid-free immunosuppression, induction immunosuppression and standard immunosuppression. PLoS One 2015;10(3) Online First. | Pharmacology                      | 2016 | Livers |    | 28   | 0      | 0       | Yes | The study protocol was approved by the independent Ethics Committee of Ruijin Hospital affiliated to Shanghai Jiao Tong University, and informed consent was obtained from each patient. The research work was performed in accordance with the ethical standards of the Helsinki Declaration.                                                                                                                                                                                                                                                                                                                                                                                                        | No  |                                                                                                                                                                    | 0    |
| 170 | Liu Y, Sun LY, Zhu ZJ, et al. Measles virus infection in pediatric liver transplantation recipients. Transplant Proc 2015;47(9):2715-8 Online First.                                                                                                                                           | PLoS ONE                          | 2015 | Livers |    | 1163 | 2008/1 | 2012/12 | Yes | This study was approved by the Ethics Committee of Tianjin First Center Hospital and confirmed to the ethical guidelines of the Declaration of Helsinki.                                                                                                                                                                                                                                                                                                                                                                                                                                                                                                                                              | Yes | None of the transplant donors were from a vulnerable population and all donors gave their consent freely.                                                          | 0    |
| 171 | Liu Z, Yu X, Ren W, et al. CD152 and PD-1 down-regulation on CD8 T cells is associated with human acute liver allograft rejection. Transplant Proc 2014;46(10):3511-4 Online First.                                                                                                            | Transplantation Proceedings       | 2015 | Livers | DD | 3    | 2014/3 | 2014/4  | No  |                                                                                                                                                                                                                                                                                                                                                                                                                                                                                                                                                                                                                                                                                                       | No  |                                                                                                                                                                    | 0    |
| 172 | Liu ZN, Wang WT, Yan LN. De Novo malignancies after liver transplantation with 14 cases at a single center. Transplant Proc 2015;47(8):2483-87 doi: 10.1016/j.transproceed.2015.08.008published Online First.                                                                                  | Transplantation Proceedings       | 2014 | Livers |    | 63   | 0      | 0       | Yes | The study protocol was approved by the institutional review board. All patients gave written informed consent to participate in this study.                                                                                                                                                                                                                                                                                                                                                                                                                                                                                                                                                           | No  |                                                                                                                                                                    | 0    |

|     | A                                                                                                                                                                                                                                                                                                               | B                                               | C    | D      | E  | F   | G      | H       | I   | J                                                                                                                                                                                                                                                                                                                                                                                                                                                                                                                                                                                                         | K   | L                                                                                                                                                                                                                                                                                                                            | M   |
|-----|-----------------------------------------------------------------------------------------------------------------------------------------------------------------------------------------------------------------------------------------------------------------------------------------------------------------|-------------------------------------------------|------|--------|----|-----|--------|---------|-----|-----------------------------------------------------------------------------------------------------------------------------------------------------------------------------------------------------------------------------------------------------------------------------------------------------------------------------------------------------------------------------------------------------------------------------------------------------------------------------------------------------------------------------------------------------------------------------------------------------------|-----|------------------------------------------------------------------------------------------------------------------------------------------------------------------------------------------------------------------------------------------------------------------------------------------------------------------------------|-----|
| 173 | Lu D, Xu X, Wang J, et al. The influence of a contemporaneous portal and hepatic artery revascularization protocol on biliary complications after liver transplantation. <i>Surgery (United States)</i> 2014;155(1):190-95 doi: 10.1016/j.surg.2013.06.056published Online First.                               | Transplantation Proceedings                     | 2015 | Livers | DD | 6   | 2002/4 | 2009/3  | Yes | All liver grafts were obtained from brain-dead or living donors. Both the living and deceased donations were voluntary in all cases, were approved by the West China Hospital Ethics Committee, and complied with the ethical guidelines of the Declaration of Helsinki.                                                                                                                                                                                                                                                                                                                                  | No  |                                                                                                                                                                                                                                                                                                                              | DBD |
| 174 | Lu H, He J, Wu Z, et al. Assessment of microbiome variation during the perioperative period in liver transplant patients: a retrospective analysis. <i>Microb Ecol</i> 2013;65(3):781-91 doi: 10.1007/s00248-013-0211-6published Online First.                                                                  | Surgery (United States)                         | 2014 | Livers | DD | 184 | 2007/1 | 2010/1  | Yes | Institutional Review Board approval (approval number: 2012- No.174 ) and informed consent in writing were obtained for each individual.                                                                                                                                                                                                                                                                                                                                                                                                                                                                   | Yes | The liver donation of each case conformed strictly to the regulation of the Ethical Committee in our hospital, and Organ Transplant Committee of Zhejiang province, as well as the declaration of Helsinki. No donor livers were procured from executed prisoners. All the donors were braindead, non-“heart-beating donors. | DCD |
| 175 | Lu HW, Dong JH, Li CH, et al. The defects of cholangiocyte primary cilia in patients with graft cholangiopathies. <i>Clin Transplant</i> 2014;28(10):1202-08 Online First.                                                                                                                                      | Microbial Ecology                               | 2013 | Livers |    | 12  | 2011/3 | 2011/12 | No  |                                                                                                                                                                                                                                                                                                                                                                                                                                                                                                                                                                                                           | No  |                                                                                                                                                                                                                                                                                                                              | 0   |
| 176 | Lu NN, Huang Q, Wang JF, et al. Non-anastomotic biliary strictures following orthotopic liver transplantation: Treatment with percutaneous transhepatic biliary drainage. <i>Hepatogastroenterology</i> 2012;59(120):2569-72 doi: 10.5754/hge12300published Online First.                                       | Clinical Transplantation                        | 2014 | Livers | DD | 4   | 2008/1 | 2010/12 | Yes | The study was approved by the ethics committee of our institute. T                                                                                                                                                                                                                                                                                                                                                                                                                                                                                                                                        | No  | The donor livers were donated after cardiac death (DCD; Table 2).                                                                                                                                                                                                                                                            | DCD |
| 177 | Lu Q, Zhong XF, Huang ZX, et al. Role of contrast-enhanced ultrasound in decision support for diagnosis and treatment of hepatic artery thrombosis after liver transplantation. <i>Eur J Radiol</i> 2012;81(3):e338-e43 doi: 10.1016/j.ejrad.2011.11.015published Online First.                                 | Hepato-Gastroenterology                         | 2012 | Livers |    | 42  | 2002/1 | 2011/1  | No  |                                                                                                                                                                                                                                                                                                                                                                                                                                                                                                                                                                                                           | No  |                                                                                                                                                                                                                                                                                                                              | 0   |
| 178 | Lu SC, Jiang T, Lai W, et al. Reestablishment of active immunity against HBV graft reinfection after liver transplantation for HBV-related end stage liver disease. <i>Journal of immunology research</i> 2014;2014:764234 Online First.                                                                        | European Journal of Radiology                   | 2012 | Livers |    | 45  | 2005/1 | 2011/1  | Yes | This study was approved by the Ethics Committee of our institute, and written informed consent was obtained from all the patients who received CEUS examination.                                                                                                                                                                                                                                                                                                                                                                                                                                          | No  |                                                                                                                                                                                                                                                                                                                              | 0   |
| 179 | Luo A, Wan Q, Ye Q, et al. The clinical manifestations and distribution and resistance of pathogens among liver transplantation with infections caused by non - Fermenters: A clinical analysis of 31 patients. <i>Hepatogastroenterology</i> 2014;61(136):2349-52 doi: 10.5754/hge14849published Online First. | Journal of Immunology Research                  | 2014 | Livers |    | 200 | 1999   | 2010    | Yes | This study was a prospective clinical study and was approved by the Ethics Committee of Beijing You-An Hospital (on January 4, 2006) and was performed according to the ethical guidelines of the 1975 Declaration of Helsinki.... Living and deceased donations were voluntary and altruistic in all cases. All organ donations or transplants were approved by the Institutional Review Board of Beijing You-An Hospital, Capital Medical University, under the guidelines of the Ethics Committee of the Hospital, the current regulations of the Chinese Government, and the Declaration of Helsinki. | No  |                                                                                                                                                                                                                                                                                                                              | 0   |
| 180 | Luo A, Zhong Z, Wan Q, et al. The distribution and resistance of pathogens among solid organ transplant recipients with <i>Pseudomonas aeruginosa</i> infections. <i>Med Sci Monit</i> 2016;22:1124-30 doi: 10.12659/MSM.896026published Online First.                                                          | Hepato-Gastroenterology                         | 2014 | Livers |    | 31  | 2007/1 | 2014/8  | Yes | The present study was approved by the two hospitals' ethics committees [that is, the Third Xiangya Hospital, Central South University, Changsha and Zhongnan Hospital, Wuhan University, Wuhan]                                                                                                                                                                                                                                                                                                                                                                                                           | No  |                                                                                                                                                                                                                                                                                                                              | 0   |
| 181 | Luo XJ, Wang W, Hu SS, et al. Extracorporeal membrane oxygenation for treatment of cardiac failure in adult patients. <i>Interact Cardiovasc Thorac Surg</i> 2009;9(2):296-300 Online First.                                                                                                                    | Medical Science Monitor                         | 2016 | Livers |    | 15  | 2003/1 | 2015/7  | Yes | The ethics committees of both hospitals approved this study.                                                                                                                                                                                                                                                                                                                                                                                                                                                                                                                                              | No  |                                                                                                                                                                                                                                                                                                                              | 0   |
| 182 | Luo YL, Yang XL, Cui JB, et al. Health-related quality of life of liver transplant recipients: A single center experience. <i>Hepatogastroenterology</i> 2012;59(118):1947-50 doi: 10.5754/hge12008published Online First.                                                                                      | Interactive Cardiovascular and Thoracic Surgery | 2009 | Hearts | DD | 45  | 2005/2 | 2008/6  | No  |                                                                                                                                                                                                                                                                                                                                                                                                                                                                                                                                                                                                           | No  |                                                                                                                                                                                                                                                                                                                              | 0   |
| 183 | Lv Z, Cai X, Weng X, et al. Tumor-stroma ratio is a prognostic factor for survival in hepatocellular carcinoma patients after liver resection or transplantation. <i>Surgery (United States)</i> 2015;158(1):142-50 doi: 10.1016/j.surg.2015.02.013published Online First.                                      | Hepato-Gastroenterology                         | 2012 | Livers |    | 55  | 2009   | 2010    | Yes | Transplantations and this study were approved by the ethics committee of West China Hospital, Sichuan University.                                                                                                                                                                                                                                                                                                                                                                                                                                                                                         | No  |                                                                                                                                                                                                                                                                                                                              | 0   |

|     | A                                                                                                                                                                                                                                                                                                           | B                                                       | C    | D      | E  | F   | G       | H       | I   | J                                                                                                                                                                                                                                                                   | K   | L                                               | M   |
|-----|-------------------------------------------------------------------------------------------------------------------------------------------------------------------------------------------------------------------------------------------------------------------------------------------------------------|---------------------------------------------------------|------|--------|----|-----|---------|---------|-----|---------------------------------------------------------------------------------------------------------------------------------------------------------------------------------------------------------------------------------------------------------------------|-----|-------------------------------------------------|-----|
| 184 | lv Z, Weng X, Du C, et al. Downregulation of HDAC6 promotes angiogenesis in hepatocellular carcinoma cells and predicts poor prognosis in liver transplantation patients. <i>Mol Carcinog</i> 2016;55(5):1024-33 doi: 10.1002/mc.22345published Online First.                                               | Surgery (United States)                                 | 2015 | Livers |    | 112 | 2006/1  | 2013/12 | Yes | All patients signed informed consent before operation for their tumor tissue and clinical characteristics to be used for research if necessary, and their individual privacy was protected. This study was approved by the Ethics Committee of Zhejiang University. | No  |                                                 | 0   |
| 185 | Lyu SQ, Ren J, Zheng RQ, et al. Contrast-enhanced sonography for diagnosing collateral transformation of the hepatic artery after liver transplantation. <i>J Ultrasound Med</i> 2015;34(9):1591-98 doi: 10.7863/ultra.15.14.08079published Online First.                                                   | Molecular Carcinogenesis                                | 2016 | Livers |    | 69  | 2007/3  | 2013/3  | Yes | Informed consent was obtained before tissue collection, and the study protocol was approved by the Ethics Committee of the First Affiliated Hospital of Zhejiang University.                                                                                        | No  |                                                 | 0   |
| 186 | Mao W, Chen J, Zheng M, et al. Initial experience of lung transplantation at a single center in China. <i>Transplant Proc</i> 2013;45(1):349-55 doi: 10.1016/j.transproceed.2012.02.045published Online First.                                                                                              | Journal of Ultrasound in Medicine                       | 2015 | Livers | DD | 98  | 2004/4  | 2014/5  | Yes | This study was approved by our Institutional Ethics Review Board and complied with the Declaration of Helsinki. Written informed consent was obtained from all of the recipients.                                                                                   | No  |                                                 | 0   |
| 187 | Mao W, Hu Y, Lou Y, et al. Immature platelet fraction values predict recovery of platelet counts following liver transplantation. <i>Clinics and Research in Hepatology and Gastroenterology</i> 2015;39(4):469-74 doi: 10.1016/j.clinre.2014.11.008published Online First.                                 | Transplantation Proceedings                             | 2013 | Lungs  |    | 100 | 2002/6  | 2010/12 | No  |                                                                                                                                                                                                                                                                     | No  |                                                 | DBD |
| 188 | Mao WJ, Chen JY, Zheng MF, et al. Lung transplantation for end-stage silicosis. <i>J Occup Environ Med</i> 2011;53(8):845-49 doi: 10.1097/JOM.0b013e3182260e50published Online First.                                                                                                                       | Clinics and Research in Hepatology and Gastroenterology | 2015 | Livers |    | 30  | 2012    | 2013    | Yes | The study was approved by the Institutional Review Board of the First Affiliated Hospital of Zhejiang University College of Medicine, and written informed consent for participation was obtained from all of the participants prior to enrollment.                 | No  |                                                 | 0   |
| 189 | Men TY, Wang JN, Li H, et al. Prevalence of multidrug-resistant gram-negative bacilli producing extended-spectrum $\beta$ -lactamases (ESBLs) and ESBL genes in solid organ transplant recipients. <i>Transpl Infect Dis</i> 2013;15(1):14-21 doi: 10.1111/tid.12001published Online First.                 | Journal of Occupational and Environmental Medicine      | 2011 | Lungs  |    | 5   | 2002/9  | 2010/12 | Yes | Lung transplantation was performed after approval from our transplantation assessment committee and institutional ethics committee.                                                                                                                                 | No  |                                                 | 0   |
| 190 | Meng X, Chen X, Wu L, et al. The hyperlipidemia caused by overuse of glucocorticoid after liver transplantation and the immune adjustment strategy. <i>Journal of Immunology Research</i> 2017;2017 Online First.                                                                                           | Transplant Infectious Disease                           | 2013 | Livers |    | 100 | 2007/4  | 2010/12 | Yes | The protocol of this study was approved by our hospital ethical committee.                                                                                                                                                                                          | No  |                                                 | 0   |
| 191 | Minmin S, Zhdong G, Hao C, et al. Correlation between pharmacokinetics and pharmacodynamics of mycophenolic acid in liver transplant patients. <i>J Clin Pharmacol</i> 2010;50(12):1388-96 doi: 10.1177/0091270009359526published Online First.                                                             | Journal of Immunology Research                          | 2017 | Livers |    | 38  | 0       | 0       | Yes | The study was approved by the Ethics Committee of the First Hospital of Zhejiang University.                                                                                                                                                                        | No  |                                                 | 0   |
| 192 | Mu HJ, Xie P, Chen JY, et al. Association of TNF- $\gamma$ , TGF- $\beta$ 1, IL-10, IL-6, and IFN- $\gamma$ gene polymorphism with acute rejection and infection in lung transplant recipients. <i>Clin Transplant</i> 2014;28(9):1016-24 doi: 10.1111/ctr.12411published Online First.                     | Journal of Clinical Pharmacology                        | 2010 | Livers | DD | 24  | 0       | 0       | Yes | This study protocol was approved by the independent ethics committee of Ruijin Hospital. The procedure was described in detail to all patients before admission, and informed consent was obtained.                                                                 | No  |                                                 | 0   |
| 193 | Niu Y, Chen X, Feng L, et al. Anti-HBc-positive/HBsAg-negative liver donors pose a higher risk of occult HBV infection but do not cause severe histological damage in liver grafts. <i>Clinics and Research in Hepatology and Gastroenterology</i> 2014;38(4):475-80 Online First.                          | Clinical Transplantation                                | 2014 | Livers |    | 113 | 2004/12 | 2012/11 | Yes | All protocols were approved by the ethics committee of the institution before the study began, and the protocols conformed to the ethical guidelines of the 1975 Helsinki Declaration.                                                                              | Yes | We did not use organs from executed prisoners   | 0   |
| 194 | Niu YJ, Shen ZY, Xu C, et al. Establishment of tacrolimus-induced diabetes in rat model and assessment of clinical treatments for post-transplant diabetes mellitus in liver transplant recipients. <i>Clinical Laboratory</i> 2013;59(7-8):869-74 doi: 10.7754/Clin.Lab.2012.120913published Online First. | Clinics and Research in Hepatology and Gastroenterology | 2014 | Livers |    | 19  | 2012/1  | 2012/5  | Yes | The Medical Ethics Committee of the General Hospital of Chinese People's Armed Police Forces approved this study.                                                                                                                                                   | No  |                                                 | 0   |
| 195 | Pan C, Shi Y, Zhang JJ, et al. Single-center experience of 253 portal vein thrombosis patients undergoing liver transplantation in China. <i>Transplant Proc</i> 2009;41(9):3761-65 doi: 10.1016/j.transproceed.2009.06.215published Online First.                                                          | Clinical Laboratory                                     | 2013 | Livers |    | 86  | 2009/1  | 2011/1  | No  |                                                                                                                                                                                                                                                                     | No  |                                                 | 0   |
| 196 | Pan C, Wang C, Pan W, et al. Usefulness of real-time three-dimensional echocardiography to quantify global left ventricular function and mechanical dyssynchrony after heart transplantation. <i>Acta Cardiol</i> 2011;66(3):365-70 doi: 10.2143/AC.66.3.2114137published Online First.                     | Transplantation Proceedings                             | 2009 | Livers |    | 253 | 1998/9  | 2007/7  | No  |                                                                                                                                                                                                                                                                     | Yes | No prisoners were used as donors for this study | 0   |
| 197 | Pan L, Zhang W, Zhang J, et al. The analysis of CD45 isoforms expression on HBV-specific T cells after liver transplantation. <i>Med Oncol</i> 2012;29(2):899-908 doi: 10.1007/s12032-011-9833-zpublished Online First.                                                                                     | Acta Cardiologica                                       | 2011 | Hearts | DD | 95  | 2005/1  | 2009/2  | Yes | The study conformed to the principles outlined in the Declaration of Helsinki. The local ethics committee approved the study and all patients provided written informed consent to participate in the study.                                                        | No  |                                                 | 0   |

|     | A                                                                                                                                                                                                                                                                                                                                | B                                                           | C    | D      | E  | F   | G       | H       | I   | J                                                                                                                                                                                                                                                                                                                                                                                                                                                                      | K   | L                                                                                                                | M       |
|-----|----------------------------------------------------------------------------------------------------------------------------------------------------------------------------------------------------------------------------------------------------------------------------------------------------------------------------------|-------------------------------------------------------------|------|--------|----|-----|---------|---------|-----|------------------------------------------------------------------------------------------------------------------------------------------------------------------------------------------------------------------------------------------------------------------------------------------------------------------------------------------------------------------------------------------------------------------------------------------------------------------------|-----|------------------------------------------------------------------------------------------------------------------|---------|
| 198 | Pei F, Shang K, Jiang B, et al. Clinicopathologic study on complications of orthotopic liver transplantation in 54 patients with chronic hepatitis B viral infection. <i>Hepatology International</i> 2013;7(2):468-76 doi: 10.1007/s12072-013-9422-7published Online First.                                                     | Medical Oncology                                            | 2012 | Livers |    | 31  | 0       | 0       | Yes | Our study was approved by the local Ethical Review Committee and performed after acquisition of written informed consent from each patient according to the Declaration of Helsinki                                                                                                                                                                                                                                                                                    | No  |                                                                                                                  | 0       |
| 199 | Peng C, Zhang Z, Wu J, et al. A critical role for ZDHHC2 in metastasis and recurrence in human hepatocellular carcinoma. <i>BioMed Research International</i> 2014;2014 Online First.                                                                                                                                            | Hepatology International                                    | 2013 | Livers |    | 54  | 2000/8  | 2004/8  | No  |                                                                                                                                                                                                                                                                                                                                                                                                                                                                        | No  |                                                                                                                  | 0       |
| 200 | Qiao B, Wu J, Wan Q, et al. Factors influencing mortality in abdominal solid organ transplant recipients with multidrug-resistant gram-negative bacteremia. <i>BMC Infect Dis</i> 2017;17 (1) Online First.                                                                                                                      | BioMed Research International                               | 2014 | Livers |    | 40  | 2006    | 2009    | Yes | This study was approved by the Ethical Review Committee of the First Affiliated Hospital, Zhejiang University School of Medicine, and informed consent was obtained according to the Declaration of Helsinki.                                                                                                                                                                                                                                                          | No  |                                                                                                                  | 0       |
| 201 | Qin J, Fang Y, Dong Y, et al. Radiological and clinical findings of 25 patients with invasive pulmonary aspergillosis: Retrospective analysis of 2150 liver transplantation cases. <i>Br J Radiol</i> 2012;85(1016):e429-e35 doi: 10.1259/bjr/39784231published Online First.                                                    | BMC Infectious Diseases                                     | 2017 | Livers | DD | 44  | 2003/1  | 2016/2  | Yes | The study protocol was approved by the Third Xiangya Hospital of CentralSouth University, Medical Ethical Committee and the Zhongnan Hospital of Wuhan University, Medical Ethical Committee. The ethics committee waived the need for written consent provided by participants due to the retrospective nature of the study                                                                                                                                           | No  |                                                                                                                  | DCD/DBD |
| 202 | Qin J, Xu J, Dong Y, et al. High-resolution CT findings of pulmonary infections after orthotopic liver transplantation in 453 patients. <i>Br J Radiol</i> 2012;85(1019):e959-e65 doi: 10.1259/bjr/26230943published Online First.                                                                                               | British Journal of Radiology                                | 2012 | Livers |    | 25  | 2003/1  | 2010/1  | Yes | Approval was obtained from the local institutional review board of our institution, and written informed consent was waived.                                                                                                                                                                                                                                                                                                                                           | No  |                                                                                                                  | 0       |
| 203 | Qin Z, Linghu EQ. New endoscopic classification system for biliary stricture after liver transplantation. <i>J Int Med Res</i> 2014;42(2):566-71 doi: 10.1177/0300060513507761published Online First.                                                                                                                            | British Journal of Radiology                                | 2012 | Livers |    | 453 | 2000/1  | 2011/1  | No  |                                                                                                                                                                                                                                                                                                                                                                                                                                                                        | No  |                                                                                                                  | 0       |
| 204 | Qiu Y, Zhu X, Wang W, et al. Nutrition support with glutamine dipeptide in patients undergoing liver transplantation. <i>Transplant Proc</i> 2009;41(10):4232-37 doi: 10.1016/j.transproceed.2009.08.076published Online First.                                                                                                  | Journal of International Medical Research                   | 2014 | Livers | DD | 78  | 2006/5  | 2011/9  | No  |                                                                                                                                                                                                                                                                                                                                                                                                                                                                        | No  |                                                                                                                  | 0       |
| 205 | Qu W, Zhu ZJ, Sun LY, et al. Correlation between immunosuppressive therapy and CD4<sup>+</sup> T-Cell intracellular adenosine triphosphate levels in liver transplant recipients. <i>Transplant Proc</i> 2016;48(6):2094-97 Online First.                                                                                        | Transplantation Proceedings                                 | 2009 | Livers |    | 65  | 2002/1  | 2005/7  | Yes | This randomized, controlled clinical study was approved by the ethical committee of our hospital. Voluntary informed consent of each patient was obtained before commencement of the investigation.                                                                                                                                                                                                                                                                    | No  |                                                                                                                  | 0       |
| 206 | Qu W, Zhu ZJ, Sun LY, et al. Correlation between survival interval and CD4<sup>+</sup> T-Cell intracellular ATP levels in liver transplant recipients. <i>Transplant Proc</i> 2017;49(2):316-21 Online First.                                                                                                                    | Transplantation Proceedings                                 | 2016 | Livers |    | 172 | 2010/7  | 2012/10 | Yes | The study was proved by the Beijing Friendship Hospital Ethics Committee, and all patients gave signed informed consents.                                                                                                                                                                                                                                                                                                                                              | No  |                                                                                                                  | 0       |
| 207 | Qu W, Zhu ZJ, Sun LY, et al. Salvage liver transplantation for hepatocellular carcinoma recurrence after primary liver resection. <i>Clinics and Research in Hepatology and Gastroenterology</i> 2015;39(1):93-97 doi: 10.1016/j.clinre.2014.07.006published Online First.                                                       | Transplantation Proceedings                                 | 2017 | Livers |    | 273 | 1998/12 | 2011/12 | Yes | The study was reviewed and approved by the Ethics Committee of our hospital, and all the subjects gave signed informed consent                                                                                                                                                                                                                                                                                                                                         | No  |                                                                                                                  | 0       |
| 208 | Ran JH, Zhang SN, Liu J, et al. In-hospital and follow up outcomes of patients undergoing orthotopic liver transplantation after hepatic artery reconstruction with an iliac interposition graft. <i>Int J Clin Exp Med</i> 2016;9(2):3939-45 Online First.                                                                      | Clinics and Research in Hepatology and Gastroenterology     | 2015 | Livers |    | 108 | 2000/4  | 2011/6  | Yes | This study was verified and approved by Beijing Friendship Hospital Ethics Committee. All clinical investigation was conducted according to the principles expressed in the Declaration of Helsinki. All patients were informed about the surgical risks before the operation, and gave signed informed consent. All consent documents were stored in the hospital database and are available upon request. All data are accessible at China Liver Transplant Registry | No  |                                                                                                                  | 0       |
| 209 | Ren J, Lu MD, Zheng RQ, et al. Evaluation of the microcirculatory disturbance of biliary ischemia after liver transplantation with contrast-enhanced ultrasound: Preliminary experience. <i>Liver Transpl</i> 2009;15(12):1703-08 doi: 10.1002/lt.21910published Online First.                                                   | International Journal of Clinical and Experimental Medicine | 2016 | Livers |    | 34  | 2006/5  | 2010/12 | Yes | The study was approved by the Ethics Committee of the First People's Hospital of Kunming City and written consent was obtained from all donors' immediate family and recipients.                                                                                                                                                                                                                                                                                       | Yes | researchers say 'written consent was obtained from all donors' immediate family', suggesting voluntary donation. | DCD     |
| 210 | Ren J, Zheng BW, Wang P, et al. Revealing impaired blood supply to the bile ducts on contrast-enhanced ultrasound: a novel diagnosis method to ischemic-type biliary lesions after orthotopic liver transplantation. <i>Ultrasound Med Biol</i> 2013;39(5):753-60 doi: 10.1016/j.ultrasmedbio.2012.12.004published Online First. | Liver Transplantation                                       | 2009 | Livers |    | 25  | 2007/2  | 2007/7  | Yes | Informed consent was obtained from all patients, and the study was approved by the institutional ethics review board.                                                                                                                                                                                                                                                                                                                                                  | No  |                                                                                                                  | 0       |

|     | A                                                                                                                                                                                                                                                                                                              | B                                                   | C    | D      | E  | F    | G      | H       | I   | J                                                                                                                                                                                                                                                                                | K  | L | M   |
|-----|----------------------------------------------------------------------------------------------------------------------------------------------------------------------------------------------------------------------------------------------------------------------------------------------------------------|-----------------------------------------------------|------|--------|----|------|--------|---------|-----|----------------------------------------------------------------------------------------------------------------------------------------------------------------------------------------------------------------------------------------------------------------------------------|----|---|-----|
| 211 | Ren L, Teng M, Zhang T, et al. Donors FMO3 polymorphisms affect tacrolimus elimination in Chinese liver transplant patients. <i>Pharmacogenomics</i> 2017;18(3):265-75 Online First.                                                                                                                           | Ultrasound in Medicine and Biology                  | 2013 | Livers |    | 42   | 2007/2 | 2009/12 | Yes | The study was approved by the institutional ethics review board. We explained in detail the whole study to every subject especially including possible bioeffects of CEUS and obtained informed consent from all subjects.                                                       | No |   | 0   |
| 212 | Ren QQ, Fu SJ, Zhao Q, et al. Prognostic value of preoperative peripheral monocyte count in patients with hepatocellular carcinoma after liver transplantation. <i>Tumor Biology</i> 2016;37(7):8973-78 Online First.                                                                                          | Pharmacogenomics                                    | 2017 | Livers |    | 110  | 2007/7 | 2012/3  | Yes | This research was approved by the Ethics Committee of Shanghai Jiao Tong University. Informed written consent was obtained according to the Declaration of Helsinki.                                                                                                             | No |   | 0   |
| 213 | Ren X, Guan J, Gao N, et al. Evaluation of pediatric liver transplantation-related artery complications using intra-operative multi-parameter ultrasonography. <i>Med Sci Monit</i> 2016;22:4495-502 Online First.                                                                                             | Tumor Biology                                       | 2016 | Livers | DD | 101  | 2009/1 | 2013/5  | No  |                                                                                                                                                                                                                                                                                  | No |   | 0   |
| 214 | Ren X, Luo Y, Gao N, et al. Common ultrasound and contrast-enhanced ultrasonography in the diagnosis of hepatic artery pseudoaneurysm after liver transplantation. <i>Exp Ther Med</i> 2016;12(2):1029-33 Online First.                                                                                        | Medical Science Monitor                             | 2016 | Livers | DD | 10   | 2007/5 | 2015/8  | Yes | All the surgeries for the donors and recipients were approved by the Ethics Committee of our hospital before the surgery (2007-39-J2), and the informed consent forms were signed.                                                                                               | No |   | DBD |
| 215 | Sha J, Tao Y, Li D, et al. Outcome of heart transplantations done in our centre. <i>Ann Transplant</i> 2008;13(3):27-29 Online First.                                                                                                                                                                          | Experimental and Therapeutic Medicine               | 2016 | Livers |    | 2085 | 2005/1 | 2015/11 | Yes | The present study was approved by the Ethics Committee of the General Hospital of Chinese People's Armed Police Forces. Written informed consent for the CEUS examination was obtained                                                                                           | No |   | 0   |
| 216 | Shan Y, Shen N, Han L, et al. MicroRNA-499 Rs3746444 polymorphism and biliary atresia. <i>Dig Liver Dis</i> 2016;48(4):423-28 Online First.                                                                                                                                                                    | Annals of Transplantation                           | 2008 | Hearts | DD | 10   | 2004/5 | 2006/2  | No  |                                                                                                                                                                                                                                                                                  | No |   | 0   |
| 217 | Shaoyin D, Yongmei Y, Tong S, et al. Follow-up examination of 12 heart transplant recipients with cardiac CT. <i>Clin Imaging</i> 2012;36(6):732-38 doi: 10.1016/j.clinimag.2012.02.004 published Online First.                                                                                                | Digestive and Liver Disease                         | 2016 | Livers | DD | 36   | 2006/1 | 2014/7  | Yes | The protocol was approved by the Research Ethics Committee of the Renji Hospital, School of Medicine, Shanghai Jiaotong University.                                                                                                                                              | No |   | DCD |
| 218 | Shen C, Peng C, Shen B, et al. Sirolimus and metformin synergistically inhibit hepatocellular carcinoma cell proliferation and improve long-term survival in patients with HCC related to hepatitis B virus induced cirrhosis after liver transplantation. <i>Oncotarget</i> 2016;7(38):62647-56 Online First. | Clinical Imaging                                    | 2012 | Hearts | DD | 12   | 2006/6 | 2011/9  | Yes | was approved by institutional ethic committee of the hospital and agreed by the subjects or their families                                                                                                                                                                       | No |   | 0   |
| 219 | Shen JY, Li C, Wen TF, et al. Liver transplantation versus surgical resection for CC meeting the Milan criteria: A propensity score analysis. <i>Medicine (United States)</i> 2016;95(52) doi: 10.1097/MD.0000000000000575 published Online First.                                                             | Oncotarget                                          | 2016 | Livers |    | 133  | 2001/1 | 2013/12 | No  |                                                                                                                                                                                                                                                                                  | No |   | 0   |
| 220 | Shen Z, Zhu Z, Zhang Y, et al. Liver transplantation at Tianjin First Central Hospital. <i>Clin Transpl</i> 2005;221-23 Online First.                                                                                                                                                                          | Medicine (United States)                            | 2016 | Livers |    | 102  | 2001/1 | 2014/12 | Yes | Written informed consent was obtained from all patients and was stored in the hospital database and used for research purposes. This study was approved by the ethics committee of the West China Hospital, and it was conducted in accordance with the Declaration of Helsinki. | No |   | 0   |
| 221 | Shen ZY, Zheng WP, Deng YL, et al. Variations in the S and P regions of the hepatitis B virus genome under immunosuppression in vitro and in vivo. <i>Viral Immunol</i> 2012;25(5):368-78 Online First.                                                                                                        | Clinical transplants                                | 2005 | Livers |    | 1803 | 1998/8 | 2005/9  | No  |                                                                                                                                                                                                                                                                                  | No |   | 0   |
| 222 | Sheng H, Lu Y, Chen H. Ocular complications of heart transplantation in a Chinese population. <i>Transplant Proc</i> 2008;40(10):3590-93 doi: 10.1016/j.transproceed.2008.06.081 published Online First.                                                                                                       | Viral Immunology                                    | 2012 | Livers |    | 34   | 2002/6 | 2003/12 | Yes | The study was approved by the hospital's research and ethics committee.                                                                                                                                                                                                          | No |   | 0   |
| 223 | Sheng L, Jun S, Jianfeng L, et al. The effect of sirolimus-based immunosuppression vs. conventional prophylaxis therapy on cytomegalovirus infection after liver transplantation. <i>Clin Transplant</i> 2015;29(6):555-59 doi: 10.1111/ctr.12552 published Online First.                                      | Transplantation Proceedings                         | 2008 | Hearts | DD | 138  | 2000/5 | 2005/10 | Yes | This study was approved by our Ethics Committee, which waived the need for individual consent forms for this retrospective analysis.                                                                                                                                             | No |   | 0   |
| 224 | Shi F, Zhang JY, Zeng Z, et al. Skewed ratios between CD3 <sup>+</sup> T cells and monocytes are associated with poor prognosis in patients with HBV-related acute-on-chronic liver failure. <i>Biochem Biophys Res Commun</i> 2010;402(1):30-36 Online First.                                                 | Clinical Transplantation                            | 2015 | Livers | DD | 127  | 2008   | 2013    | No  |                                                                                                                                                                                                                                                                                  | No |   | DCD |
| 225 | Shi R, Shen ZY, Teng da H, et al. Gallstones in liver transplant recipients: A single-center study in China. <i>Turkish Journal of Gastroenterology</i> 2015;26(5):429-34 Online First.                                                                                                                        | Biochemical and Biophysical Research Communications | 2010 | Livers |    | 10   | 0      | 0       | No  |                                                                                                                                                                                                                                                                                  | No |   | 0   |



|     | A                                                                                                                                                                                                                                                                                                              | B                                                             | C    | D      | E  | F    | G       | H       | I   | J                                                                                                                                                                                                                                                                                                                                         | K   | L                                                           | M   |
|-----|----------------------------------------------------------------------------------------------------------------------------------------------------------------------------------------------------------------------------------------------------------------------------------------------------------------|---------------------------------------------------------------|------|--------|----|------|---------|---------|-----|-------------------------------------------------------------------------------------------------------------------------------------------------------------------------------------------------------------------------------------------------------------------------------------------------------------------------------------------|-----|-------------------------------------------------------------|-----|
| 226 | Shi SH, Kong HS, Jia CK, et al. Risk factors for pneumonia caused by multidrug-resistant Gram-negative bacilli among liver recipients. <i>Clin Transplant</i> 2010;24(6):758-65 Online First.                                                                                                                  | Turkish Journal of Gastroenterology                           | 2015 | Livers |    | 1640 | 1994/5  | 2011/7  | Yes | This study was conducted in accordance with the declaration of Helsinki and with approval from the ethics committee of Tianjin Medical University. Signed consent forms were obtained from all participants.                                                                                                                              | No  |                                                             | 0   |
| 227 | Shi SH, Kong HS, Xu J, et al. Multidrug resistant gram-negative bacilli as predominant bacteremic pathogens in liver transplant recipients. <i>Transpl Infect Dis</i> 2009;11(5):405-12 doi: 10.1111/j.1399-3062.2009.00421.xpublished Online First.                                                           | Clinical Transplantation                                      | 2010 | Livers |    | 475  | 2002/1  | 2006/12 | No  |                                                                                                                                                                                                                                                                                                                                           | No  |                                                             | 0   |
| 228 | Shi Y, Li Y, Tang J, et al. Influence of CYP3A4, CYP3A5 and MDR-1 polymorphisms on tacrolimus pharmacokinetics and early renal dysfunction in liver transplant recipients. <i>Gene</i> 2013;512(2):226-31 doi: 10.1016/j.gene.2012.10.048published Online First.                                               | Transplant Infectious Disease                                 | 2009 | Livers |    | 475  | 2003/1  | 2006/12 | Yes | This study was approved by our hospital ethical committee.                                                                                                                                                                                                                                                                                | No  |                                                             | 0   |
| 229 | Shi Z, Yan L, Zhao J, et al. Prevention and treatment of rethrombosis after liver transplantation with an implantable pump of the portal vein. <i>Liver Transpl</i> 2010;16(3):324-31 doi: 10.1002/lt.21988published Online First.                                                                             | Gene                                                          | 2013 | Livers |    | 216  | 2000/4  | 2008/3  | Yes | This study was approved by the West China Hospital.                                                                                                                                                                                                                                                                                       | No  |                                                             | 0   |
| 230 | Song SH, Li XX, Wan QQ, et al. Risk factors for mortality in liver transplant recipients with ESKAPE infection. <i>Transplant Proc</i> 2014;46(10):3560-63 doi: 10.1016/j.transproceed.2014.08.049published Online First.                                                                                      | Liver Transplantation                                         | 2010 | Livers | DD | 275  | 1999/2  | 2007/12 | Yes | Written, informed consent was obtained from all patients for the inclusion of their data in this study, which was approved by the Huaxi Ethics Committee and conformed with the ethical guidelines of the 1975 Declaration of Helsinki.                                                                                                   | No  |                                                             | BDD |
| 231 | Su H, Liu Z, Sun Y, et al. Efficacy and safety of low accelerating dose regimen of interferon/ribavirin antiviral therapy in patients with hepatitis C virus recurrence after liver transplantation. <i>Ann Transplant</i> 2015;20:263-68 doi: 10.12659/AOT.892255published Online First.                      | Transplantation Proceedings                                   | 2014 | Livers |    | 51   | 2007/1  | 2014/5  | Yes | The present study was approved by the two hospitals' ethics committees.                                                                                                                                                                                                                                                                   | No  |                                                             | 0   |
| 232 | Su H, Ye Q, Wan Q, et al. Predictors of mortality in abdominal organ transplant recipients with pseudomonas aeruginosa infections. <i>Ann Transplant</i> 2016;21 Online First.                                                                                                                                 | Annals of Transplantation                                     | 2015 | Livers |    | 31   | 2005/1  | 2010/12 | Yes | This study was approved by the Ethics Committees of Beijing 302 Hospital.                                                                                                                                                                                                                                                                 | No  |                                                             | 0   |
| 233 | Sun B, Li XY, Gao JW, et al. Population pharmacokinetic study of cyclosporine based on NONMEM in Chinese liver transplant recipients. <i>Ther Drug Monit</i> 2010;32(6):715-22 doi: 10.1097/FDT.0b013e3181fb6ce3published Online First.                                                                        | Annals of Transplantation                                     | 2016 | Livers |    | 310  | 2003/1  | 2015/6  | Yes | The Third Xiangya Hospital, Central South University and the Zhongnan Hospital, Wuhan University, Medical Ethical Committee approved the study protocol prior to patient identification and data collection.                                                                                                                              | No  |                                                             | 0   |
| 234 | Sun H, Teng M, Liu J, et al. FOXM1 expression predicts the prognosis in hepatocellular carcinoma patients after orthotopic liver transplantation combined with the Milan criteria. <i>Cancer Lett</i> 2011;306(2):214-22 doi: 10.1016/j.canlet.2011.03.009published Online First.                              | Therapeutic Drug Monitoring                                   | 2010 | Livers |    | 124  | 2000    | 2007    | Yes | The study was conducted in accordance with the Declaration of Helsinki and its amendments. Approval was obtained from the First People's Hospital Affiliated to Shanghai Jiao Tong University Medical Research Ethics Committee to collect pharmacokinetic, demographic, and covariate data retrospectively from patient medical records. | No  |                                                             | 0   |
| 235 | Sun J, Cao G, Zhang L, et al. Human cytomegalovirus (CMV) UL97 D605E mutation has a higher prevalence in infants with primary CMV infection compared with transplant recipients with CMV recurrence. <i>Transplant Proc</i> 2012;44(10):3022-25 doi: 10.1016/j.transproceed.2012.06.069published Online First. | Cancer Letters                                                | 2011 | Livers | DD | 5    | 2001/10 | 2009/4  | Yes | Ethical approval from the Institutional Review Board of Shanghai Jiaotong University and informed written consent was obtained from each patient or their guardians for use of the tissue specimens.                                                                                                                                      | No  |                                                             | 0   |
| 236 | Sun XY, Dong JH, Qin K, et al. Single center study on transplantation of livers donated after cardiac death: A report of 6 cases. <i>Exp Ther Med</i> 2016;11(3):988-92 doi: 10.3892/etm.2016.3001published Online First.                                                                                      | Transplantation Proceedings                                   | 2012 | Livers |    | 69   | 2002/1  | 2009/6  | Yes | The study was approved by our Research Ethics Committee and written informed consent was obtained from the patients or their legal guardians                                                                                                                                                                                              | No  |                                                             | 0   |
| 237 | Sun Y, Yin S, Xie H, et al. Immunophenotypic shift of memory CD8 T cells identifies the changes of immune status in the patients after liver transplantation. <i>Scand J Clin Lab Invest</i> 2009;69(7):789-96 doi: 10.3109/00365510903268818published Online First.                                           | Experimental and Therapeutic Medicine                         | 2016 | Livers | DD | 6    | 2011/1  | 2013/12 | Yes | with the approval of the Medical Ethics Committee at this institution                                                                                                                                                                                                                                                                     | Yes | The donation procedure followed the DCD guidelines of China | DCD |
| 238 | Teng da H, Zhu ZJ, Zheng H, et al. Effect of steatosis donor liver transplantation on hepatocellular carcinoma recurrence: experience at a single institution. <i>Hepatogastroenterology</i> 2012;59(115):858-62 Online First.                                                                                 | Scandinavian Journal of Clinical and Laboratory Investigation | 2009 | Livers |    | 62   | 0       | 0       | Yes | This study was approved by the local medical ethics committee and all participants gave their informed consents.                                                                                                                                                                                                                          | No  |                                                             | 0   |
| 239 | Teng F, Han QC, Ding GS, et al. Validation of a criteria-specific long-term survival prediction model for hepatocellular carcinoma patients after liver transplantation. <i>Sci Rep</i> 2015;5:11733 Online First.                                                                                             | Hepato-Gastroenterology                                       | 2012 | Livers | DD | 131  | 2007/1  | 2008/12 | Yes | Signed informed consent forms were obtained from all patients to allow sample collection before undergoing OLT. This study was reviewed and approved by the Ethics Committee of First Center Hospital Clinic Institute, Tianjin Medical University.                                                                                       | No  |                                                             | DCD |

|     | A                                                                                                                                                                                                                                                                                                                                  | B                                                   | C    | D      | E  | F    | G       | H       | I   | J                                                                                                                                                                                                                                                                                                                                                                                                                                                                                         | K  | L                                                                                                                                                                                                                               | M         |
|-----|------------------------------------------------------------------------------------------------------------------------------------------------------------------------------------------------------------------------------------------------------------------------------------------------------------------------------------|-----------------------------------------------------|------|--------|----|------|---------|---------|-----|-------------------------------------------------------------------------------------------------------------------------------------------------------------------------------------------------------------------------------------------------------------------------------------------------------------------------------------------------------------------------------------------------------------------------------------------------------------------------------------------|----|---------------------------------------------------------------------------------------------------------------------------------------------------------------------------------------------------------------------------------|-----------|
| 240 | Tu Z, Xiang P, Xu X, et al. DCD liver transplant infection: Experience from a single centre in China. <i>Int J Clin Pract</i> 2016;70:3-10 doi: 10.1111/ijcp.12810 published Online First.                                                                                                                                         | Scientific Reports                                  | 2015 | Livers | DD | 1309 | 1980/1  | 2008/6  | Yes | The study proposal, which was consistent with the ethical guidelines of the 1975 Declaration of Helsinki, was presented to CLTR and approved by Scientific Committee of CLTR in 2013. According to CLTR policy, researchers cannot obtain original data, and the statistical analysis is independently conducted by the CLTR system and statisticians complying with the study proposal. All methods were performed in accordance with the approved guidelines for CLTR clinical studies. | No |                                                                                                                                                                                                                                 | 0         |
| 241 | Vitale A, Cucchetti A, Qiao GL, et al. Is resectable hepatocellular carcinoma a contraindication to liver transplantation? A novel decision model based on "number of patients needed to transplant" as measure of transplant benefit. <i>J Hepatol</i> 2014;60(6):1165-71 doi: 10.1016/j.jhep.2014.01.022 published Online First. | International Journal of Clinical Practice          | 2016 | Livers | DD | 257  | 2010/10 | 2015/5  | Yes | Our study follows the guidelines of the Ethics Committee of our hospital and the Declaration of Helsinki.                                                                                                                                                                                                                                                                                                                                                                                 | No | Donor factors were released from the China Liver Transplant Registry (CLTR). WR Do not clearly state that donors were voluntary. WITs are short (less than 10 min) so not clearly either executions or deaths after withdrawal. | DCD       |
| 242 | Wan P, Xia Q, Zhang JJ, et al. Liver transplantation for hepatocellular carcinoma exceeding the Milan criteria: A single-center experience. <i>J Cancer Res Clin Oncol</i> 2014;140(2):341-48 doi: 10.1007/s00432-013-1576-0 published Online First.                                                                               | Journal of Hepatology                               | 2014 | Livers |    | 441  | 2000/1  | 2011/12 | No  |                                                                                                                                                                                                                                                                                                                                                                                                                                                                                           | No |                                                                                                                                                                                                                                 | 0         |
| 243 | Wan P, Zhang J, Long X, et al. Serum levels of preoperative $\alpha$ -fetoprotein and CA19-9 predict survival of hepatic carcinoma patients after liver transplantation. <i>Eur J Gastroenterol Hepatol</i> 2014;26(5):553-61 doi: 10.1097/MEG.000000000000070 published Online First.                                             | Journal of Cancer Research and Clinical Oncology    | 2014 | Livers | DD | 114  | 2007/1  | 2010/12 | Yes | Organ donations and transplantations in the study were carried out in strict accordance with the regulation of Shanghai Organ Transplant Committee and the declaration of Helsinki. All of the living organs were donated with an informed consent                                                                                                                                                                                                                                        | No |                                                                                                                                                                                                                                 | DBD + DCD |
| 244 | Wan Q, Ye Q, Su T, et al. The epidemiology and distribution of pathogens and risk factors for mortality in liver transplant recipients with gram negative bacteremia. <i>Hepatogastroenterology</i> 2014;61(134):1730-33 doi: 10.5754/hge14504 published Online First.                                                             | European Journal of Gastroenterology and Hepatology | 2014 | Livers | DD | 189  | 2007/1  | 2010/6  | Yes | Organ donation or transplantation in the study was strictly implemented under the regulation of Shanghai Organ Transplant Committee and the Declaration of Helsinki. Ethical approval was obtained from the Committee of Ethics at Ren Ji Hospital. All of the living organs were donated with informed consent                                                                                                                                                                           | No |                                                                                                                                                                                                                                 | DBD + DCD |
| 245 | Wan QQ, Ye QF, Ming YZ, et al. The risk factors for mortality in deceased donor liver transplant recipients with bloodstream infections. <i>Transplant Proc</i> 2013;45(1):305-07 doi: 10.1016/j.transproceed.2012.06.080 published Online First.                                                                                  | Hepato-Gastroenterology                             | 2014 | Livers |    | 35   | 2002/1  | 2014/4  | Yes | upon approval by ethical committees of Third Xiangya Hospital, Central South University, Changsha and Zhongnan Hospital, Wuhan University, Wuhan, China, ...                                                                                                                                                                                                                                                                                                                              | No |                                                                                                                                                                                                                                 | 0         |
| 246 | Wang B, He HK, Cheng B, et al. Effect of low central venous pressure on postoperative pulmonary complications in patients undergoing liver transplantation. <i>Surg Today</i> 2013;43(7):777-81 doi: 10.1007/s00595-012-0419-y published Online First.                                                                             | Transplantation Proceedings                         | 2013 | Livers | DD | 43   | 2002/1  | 2012/1  | Yes | The present study was approved by our hospital ethical committee.                                                                                                                                                                                                                                                                                                                                                                                                                         | No |                                                                                                                                                                                                                                 | 0         |
| 247 | Wang C, Wang G, Yi H, et al. Symptom experienced three years after liver transplantation under immunosuppression in adults. [Erratum appears in <i>PLoS One</i> . 2013;8(12). doi:10.1371/annotation/161a6145-d670-408a-9fc-a1107b57724a]. <i>PLoS ONE [Electronic Resource]</i> 2013;8(11):e80584 Online First.                   | Surgery Today                                       | 2013 | Livers | DD | 65   | 2003/6  | 2009/12 | Yes | This study was conducted under the approval of the Ethical Committee of Chongqing Medical University. Informed consent was obtained from all patients before transplantation.                                                                                                                                                                                                                                                                                                             | No |                                                                                                                                                                                                                                 | 0         |
| 248 | Wang CM, Li X, Song S, et al. Newly designed y-configured single-catheter stenting for the treatment of hilar-type nonanastomotic biliary strictures after orthotopic liver transplantation. <i>Cardiovasc Intervent Radiol</i> 2012;35(1):184-89 doi: 10.1007/s00270-011-0214-y published Online First.                           | PLoS ONE [Electronic Resource]                      | 2013 | Livers |    | 94   | 0       | 0       | Yes | This study was approved by the ethics committee of the Third Affiliated Hospital of Sun Yat-sen University in Guangzhou, China. Written informed consent was obtained prior to data collection.                                                                                                                                                                                                                                                                                           | No |                                                                                                                                                                                                                                 | 0         |
| 249 | Wang E, Nie Y, Zhao Q, et al. Circulating miRNAs reflect early myocardial injury and recovery after heart transplantation. <i>J Cardiothorac Surg</i> 2013;8(1) doi: 10.1186/1749-8090-8-165 published Online First.                                                                                                               | CardioVascular and Interventional Radiology         | 2012 | Livers | DD | 10   | 2000/7  | 2010/7  | Yes | Study approval was obtained from the internal review board of the hospital.                                                                                                                                                                                                                                                                                                                                                                                                               | No |                                                                                                                                                                                                                                 | 0         |
| 250 | Wang G, Yang J, Li M, et al. Liver transplant may improve erectile function in patients with benign end-stage liver disease: Single-center Chinese experience. <i>Exp Clin Transplant</i> 2013;11(4):332-38 doi: 10.6002/ect.2012.0102 published Online First.                                                                     | Journal of Cardiothoracic Surgery                   | 2013 | Hearts | DD | 7    | 2011/7  | 2011/8  | Yes | The protocol of this study was carried out according to the principles of the Declaration of Helsinki and approved by the Medical Ethics Committee of Cardiovascular Institute and Fu Wai Hospital. Written informed consent was obtained from all the participants before enrolment.                                                                                                                                                                                                     | No |                                                                                                                                                                                                                                 | 0         |

|     | A                                                                                                                                                                                                                                                                                                                           | B                                                           | C    | D      | E  | F   | G       | H       | I   | J                                                                                                                                                                                                                                                                                                                              | K  | L | M   |
|-----|-----------------------------------------------------------------------------------------------------------------------------------------------------------------------------------------------------------------------------------------------------------------------------------------------------------------------------|-------------------------------------------------------------|------|--------|----|-----|---------|---------|-----|--------------------------------------------------------------------------------------------------------------------------------------------------------------------------------------------------------------------------------------------------------------------------------------------------------------------------------|----|---|-----|
| 251 | Wang GY, Jiang N, Yi HM, et al. Pretransplant elevated plasma fibrinogen level is a novel prognostic predictor for hepatocellular carcinoma recurrence and patient survival following liver transplantation. <i>Ann Transplant</i> 2016;21:125-30 doi: 10.12659/AOT.895416published Online First.                           | Experimental and Clinical Transplantation                   | 2013 | Livers |    | 60  | 2003/10 | 2008/12 | Yes | The study was approved by the Institutional Ethics Review Board Committee of the Third Affiliated Hospital of Sun Yat-Sen University. All protocols conformed with the ethical guidelines of the 1975 Helsinki Declaration, and written, informed consent was obtained from all patients.                                      | No |   | 0   |
| 252 | Wang GY, Li H, Liu W, et al. Elevated blood eosinophil count is a valuable biomarker for predicting late acute cellular rejection after liver transplantation. <i>Transplant Proc</i> 2013;45(3):1198-200 Online First.                                                                                                     | Annals of Transplantation                                   | 2016 | Livers | DD | 41  | 2007/10 | 2009/1  | No  |                                                                                                                                                                                                                                                                                                                                | No |   | DCD |
| 253 | Wang GY, Yang Y, Li H, et al. A scoring model based on neutrophil to lymphocyte ratio predicts recurrence of HBV-associated hepatocellular carcinoma after liver transplantation. <i>PLoS One</i> 2011;6(9) doi: 10.1371/journal.pone.0025295published Online First.                                                        | Transplantation Proceedings                                 | 2013 | Livers |    | 37  | 0       | 0       | No  |                                                                                                                                                                                                                                                                                                                                | No |   | 0   |
| 254 | Wang J, Liu JJ, Liang YY, et al. Could diffusion-weighted imaging detect injured bile ducts of ischemic-type biliary lesions after orthotopic liver transplantation? <i>American Journal of Roentgenology</i> 2012;199(4):901-06 doi: 10.2214/AJR.11.8147published Online First.                                            | PLoS ONE                                                    | 2011 | Livers |    | 101 | 2003/10 | 2009/6  | No  | Å                                                                                                                                                                                                                                                                                                                              | No |   | 0   |
| 255 | Wang J, Yang W, Huang Q, et al. Interventional treatment for portal venous occlusion after liver transplantation: Long-term follow-up results. <i>Medicine (United States)</i> 2015;94(4) doi: 10.1097/MD.0000000000000356published Online First.                                                                           | American Journal of Roentgenology                           | 2012 | Livers |    | 55  | 2005/4  | 2009/11 | Yes | Informed consent was obtained from all patients, and the study was approved by the institutional ethics review board                                                                                                                                                                                                           | No |   | 0   |
| 256 | Wang JF, Zhai RY, Wei BJ, et al. Percutaneous intravascular stents for treatment of portal venous stenosis after liver transplantation: midterm results. <i>Transplant Proc</i> 2006;38(5):1461-62 doi: 10.1016/j.transproceed.2006.02.113published Online First.                                                           | Medicine (United States)                                    | 2015 | Livers | DD | 12  | 2007/7  | 2013/4  | Yes | This study was approved by the Institutional Review Board, Chaoyang Hospital, Beijing, China. Informed consent was obtained from each patient prior to all procedures                                                                                                                                                          | No |   | 0   |
| 257 | Wang K, Zhu ZJ, Zheng H, et al. Protective hepatitis B surface antibodies in blood and ascites fluid in the early stage after liver transplantation for hepatitis B diseases. <i>Hepatology Research</i> 2012;42(3):280-87 doi: 10.1111/j.1872-034X.2011.00926.xpublished Online First.                                     | Transplantation Proceedings                                 | 2006 | Livers |    | 10  | 2004/4  | 2005/5  | No  |                                                                                                                                                                                                                                                                                                                                | No |   | 0   |
| 258 | Wang L, Li N, Wang MX, et al. Benefits of minimizing immunosuppressive dosage according to cytochrome P450 3A5 genotype in liver transplant patients: Findings from a single-center study. <i>Genetics and Molecular Research</i> 2015;14(2):3191-99 doi: 10.4238/2015.April.10.31published Online First.                   | Hepatology Research                                         | 2012 | Livers |    | 26  | 2006/11 | 2007/2  | Yes | All subjects signed the Informed Consent Form. The study protocol was approved by the institutional review board of the hospital and the study was also conducted in accordance with the principles delineated in the Declaration of Helsinki and the State Food and Drug Administration.                                      | No |   | 0   |
| 259 | Wang L, Zang Y, Lu S, et al. Efficacy of sirolimus on ischemic-type biliary lesions after liver transplantation. <i>Int J Clin Exp Med</i> 2017;10(1):1151-55 Online First.                                                                                                                                                 | Genetics and Molecular Research                             | 2015 | Livers | DD | 206 | 2010/1  | 2012    | Yes | The study was approved by the hospital Ethics Committee [approval number: 2013 (8)]                                                                                                                                                                                                                                            | No |   | 0   |
| 260 | Wang LJ, Liu ZR, Zhang YM, et al. Clinical analysis of liver transplantation for benign liver tumor. <i>Int J Clin Exp Med</i> 2016;9(11):22691-95 Online First.                                                                                                                                                            | International Journal of Clinical and Experimental Medicine | 2017 | Livers |    | 52  | 2004/5  | 2016/4  | No  |                                                                                                                                                                                                                                                                                                                                | No |   | 0   |
| 261 | Wang P, Li H, Shi B, et al. Prognostic factors in patients with recurrent hepatocellular carcinoma treated with salvage liver transplantation: A single-center study. <i>Oncotarget</i> 2016;7(23):35071-83 Online First.                                                                                                   | International Journal of Clinical and Experimental Medicine | 2016 | Livers | DD | 15  | 2001    | 2014    | No  |                                                                                                                                                                                                                                                                                                                                | No |   | 0   |
| 262 | Wang P, Song W, Li H, et al. Association between donor and recipient smoothed gene polymorphisms and the risk of hepatocellular carcinoma recurrence following orthotopic liver transplantation in a Han Chinese population. <i>Tumor Biology</i> 2015;36(10):7807-15 doi: 10.1007/s13277-015-3370-xpublished Online First. | Oncotarget                                                  | 2016 | Livers |    | 74  | 2001/10 | 2013/2  | Yes | This study was approved by the Institutional Review Board of the Shanghai General Hospital, Shanghai Jiao Tong University School of Medicine, and was conducted according to the 1964 Helsinki Declaration and its later amendments                                                                                            | No |   | 0   |
| 263 | Wang P, Wang C, Li H, et al. Impact of age on the prognosis after liver transplantation for patients with hepatocellular carcinoma: A single-center experience. <i>Onco Targets Ther</i> 2015;8:3775-81 doi: 10.2147/OTT.S93939published Online First.                                                                      | Tumor Biology                                               | 2015 | Livers |    | 76  | 2001/7  | 2012/8  | Yes | Informed consent was obtained from every donor and recipient. Each organ donation or transplant was approved by the Institutional Review Board Liver Transplantation Surgery, Shanghai First People's Hospital, Shanghai, China, under the guidelines of the Ethics Committee of the hospital, and the Declaration of Helsinki | No |   | 0   |

|     | A                                                                                                                                                                                                                                                                                                                                         | B                                                      | C    | D      | E  | F   | G      | H       | I   | J                                                                                                                                                                                                                                                                                                                                                                                                                                                                                                                                                                | K   | L                                                                                                                                                   | M   |
|-----|-------------------------------------------------------------------------------------------------------------------------------------------------------------------------------------------------------------------------------------------------------------------------------------------------------------------------------------------|--------------------------------------------------------|------|--------|----|-----|--------|---------|-----|------------------------------------------------------------------------------------------------------------------------------------------------------------------------------------------------------------------------------------------------------------------------------------------------------------------------------------------------------------------------------------------------------------------------------------------------------------------------------------------------------------------------------------------------------------------|-----|-----------------------------------------------------------------------------------------------------------------------------------------------------|-----|
| 264 | Wang PL, Wang J, Zhou Y, et al. Expression of programmed death-1 and its ligands in the liver of biliary atresia. <i>World J Pediatr</i> 2017;1-7 Online First.                                                                                                                                                                           | Oncotargets and Therapy                                | 2015 | Livers | DD | 290 | 2001/1 | 2011/12 | Yes | This study was approved by the Institutional Review Board for Liver Transplantation Surgery, Shanghai First People's Hospital, Shanghai, People's Republic of China, under the guidelines of the Ethics Committee of the hospital and in accordance with the Declaration of Helsinki                                                                                                                                                                                                                                                                             | No  |                                                                                                                                                     | 0   |
| 265 | Wang S, Li J, Xie A, et al. Dynamic changes in Th1, Th17, and FoxP3+ T cells in patients with acute cellular rejection after cardiac transplantation. <i>Clin Transplant</i> 2011;25(2):E177-E86 doi: 10.1111/j.1399-0012.2010.01362.x published Online First.                                                                            | World Journal of Pediatrics                            | 2017 | Livers |    | 15  | 2014/7 | 2015/7  | Yes | Ethical approval: Informed consent was obtained from each enrolled donor and the patient's parent or guardian before sample collection. The experimental protocol was approved by the Ethics Committee at Xinhua Hospital                                                                                                                                                                                                                                                                                                                                        | No  |                                                                                                                                                     | 0   |
| 266 | Wang SY, Tang HM, Chen GQ, et al. Effect of ursodeoxycholic acid administration after liver transplantation on serum liver tests and biliary complications: A randomized clinical trial. <i>Digestion</i> 2012;86(3):208-17 doi: 10.1159/000339711 published Online First.                                                                | Clinical Transplantation                               | 2011 | Hearts | DD | 24  | 0      | 0       | Yes | the study was approved by a local medical ethical committee for reviewing clinical study.                                                                                                                                                                                                                                                                                                                                                                                                                                                                        | No  |                                                                                                                                                     | 0   |
| 267 | Wang W, Ye Y, Wang T, et al. Prognostic prediction of male recipients selected for liver transplantation: With special attention to neutrophil to lymphocyte ratio. <i>Hepatology Research</i> 2016;46(9):899-907 doi: 10.1111/hepr.12633 published Online First.                                                                         | Digestion                                              | 2012 | Livers | DD | 112 | 2005/5 | 2008/4  | Yes | Informed consent was obtained from each patient included in the study. DCD livers were neither from executed prisoners nor from other institutionalized persons. The study protocol conformed to the ethical guidelines of the 2000 Declaration of Helsinki and was a priori approved by the Medical Ethics Committee of our institution. Our institution also adheres to the Declaration of Istanbul on Organ Trafficking and Transplant Tourism. This trial was registered in <a href="http://clinicaltrials.gov">http://clinicaltrials.gov</a> (NCT01073202). | Yes | DCD livers were neither from executed prisoners nor from other institutionalized persons.                                                           | DCD |
| 268 | Wang WL, Jin J, Zheng SS, et al. Tacrolimus dose requirement in relation to donor and recipient ABCB1 and CYP3A5 gene polymorphisms in Chinese liver transplant patients. <i>Liver Transpl</i> 2006;12(5):775-80 doi: 10.1002/lt.20709 published Online First.                                                                            | Hepatology Research                                    | 2016 | Livers |    | 248 | 2002/1 | 2012/12 | Yes | All participants provided full written informed consents, and ethical approval was obtained from the Committee of Ethics in Biomedical Research of Zhejiang University.                                                                                                                                                                                                                                                                                                                                                                                          | No  |                                                                                                                                                     | 0   |
| 269 | Wang Y, Liu Y, Han R, et al. Hemostatic variation during perioperative period of orthotopic liver transplantation without venovenous bypass. <i>Thromb Res</i> 2008;122(2):161-66 doi: 10.1016/j.thromres.2007.10.002 published Online First.                                                                                             | Liver Transplantation                                  | 2006 | Livers | DD | 50  | 2004/7 | 2005/3  | No  |                                                                                                                                                                                                                                                                                                                                                                                                                                                                                                                                                                  | No  |                                                                                                                                                     | 0   |
| 270 | Wang Y, Liu Y, Han R, et al. Monitoring of CD95 and CD38 expression in peripheral blood T lymphocytes during active human cytomegalovirus infection after orthotopic liver transplantation. <i>Journal of Gastroenterology and Hepatology (Australia)</i> 2010;25(1):138-42 doi: 10.1111/j.1440-1746.2009.05966.x published Online First. | Thrombosis Research                                    | 2008 | Livers | DD | 20  | 2004   | 2004    | Yes | The present study was approved by the institutional ethics committee of our institute. The informed consent was obtained from each patient. All recipients received liver from cadaveric donors. The procedure met all applicable institutional guidelines of the Tianjin First Central Hospital, Tianjin Medical University, China, and Chinese governmental regulations concerning the ethical use of donated organs.                                                                                                                                          | No  |                                                                                                                                                     | 0   |
| 271 | Wang Y, Liu Y, Han R, et al. Temporal evolution of soluble Fas and Fas ligand in patients with orthotopic liver transplantation. <i>Cytokine</i> 2008;41(3):240-43 doi: 10.1016/j.cyto.2007.11.010 published Online First.                                                                                                                | Journal of Gastroenterology and Hepatology (Australia) | 2010 | Livers | DD | 44  | 2004   | 2004    | Yes | The present study was approved by the institutional ethics committee of our institute. Informed consent was obtained from each recipient. All recipients had undergone OLT (donor livers were from cadaveric donors who voluntarily donated). No organs were obtained from executed prisoners. The procedure met all applicable institutional guidelines of the Tianjin First Central Hospital, Tianjin Medical University, China, and Chinese governmental regulations concerning the ethical use of donated organs.                                            | Yes | All recipients had undergone OLT (donor livers were from cadaveric donors who voluntarily donated). No organs were obtained from executed prisoners | 0   |
| 272 | Wang Y, Liu Y, Zhang Y, et al. The role of the CD95, CD38 and TGF-β1 during active human cytomegalovirus infection in liver transplantation. <i>Cytokine</i> 2006;35(3-4):193-99 doi: 10.1016/j.cyto.2006.08.001 published Online First.                                                                                                  | Cytokine                                               | 2008 | Livers | DD | 20  | 0      | 0       | No  |                                                                                                                                                                                                                                                                                                                                                                                                                                                                                                                                                                  | No  |                                                                                                                                                     | 0   |
| 273 | Wang Y, Shen Z, Zhu Z, et al. Clinical values of AFP, GPC3 mRNA in peripheral blood for prediction of hepatocellular carcinoma recurrence following OLT. <i>Hepatitis Monthly</i> 2011;11(3):195-99 Online First.                                                                                                                         | Cytokine                                               | 2006 | Livers | DD | 30  | 2003   | 2004    | No  |                                                                                                                                                                                                                                                                                                                                                                                                                                                                                                                                                                  | No  |                                                                                                                                                     | 0   |

|     | A                                                                                                                                                                                                                                                                                                   | B                                         | C    | D      | E  | F  | G      | H       | I   | J                                                                                                                                                                                                                                                                                                                                             | K   | L                                                                                                                                                         | M   |
|-----|-----------------------------------------------------------------------------------------------------------------------------------------------------------------------------------------------------------------------------------------------------------------------------------------------------|-------------------------------------------|------|--------|----|----|--------|---------|-----|-----------------------------------------------------------------------------------------------------------------------------------------------------------------------------------------------------------------------------------------------------------------------------------------------------------------------------------------------|-----|-----------------------------------------------------------------------------------------------------------------------------------------------------------|-----|
| 274 | Wang Y, Zhang M, Liu ZW, et al. The ratio of circulating regulatory T cells (Tregs)/Th17 cells is associated with acute allograft rejection in liver transplantation. PLoS One 2014;9(11) doi: 10.1371/journal.pone.0112135 published Online First.                                                 | Hepatitis Monthly                         | 2011 | Livers |    | 29 | 2008/1 | 2008/12 | Yes | The present study was approved by the Institutional Ethics Committee of our institute. The informed consent was obtained from each patient. The procedure met all applicable institutional guidelines of our institute, and governmental regulations concerning the ethical use of donated organs.                                            | Yes | All recipients had undergone successful OLT (livers were from cadaveric donors who voluntarily donated). No organs were obtained from executed prisoners. | 0   |
| 275 | Wang YL, Li G, Zhang Y, et al. The expression of von Willebrand factor, soluble thrombomodulin, and soluble p-selectin during orthotopic liver transplantation. Transplant Proc 2007;39(1):172-75 doi: 10.1016/j.transproceed.2006.10.027 published Online First.                                   | PLoS ONE                                  | 2014 | Livers | DD | 38 | 0      | 0       | Yes | The study protocol was approved by the institutional review board of Beijing 302 hospital.                                                                                                                                                                                                                                                    | No  |                                                                                                                                                           | 0   |
| 276 | Wang YL, Li G, Wu D, et al. Analysis of alpha-fetoprotein mRNA level on the tumor cell hematogenous spread of patients with hepatocellular carcinoma undergoing orthotopic liver transplantation. Transplant Proc 2007;39(1):166-68 doi: 10.1016/j.transproceed.2006.10.008 published Online First. | Transplantation Proceedings               | 2007 | Livers |    | 20 | 2004   | 2004    | No  |                                                                                                                                                                                                                                                                                                                                               | No  |                                                                                                                                                           | 0   |
| 277 | Wang YL, Tang ZQ, Gao W, et al. Influence of Th1, Th2, and Th3 cytokines during the early phase after liver transplantation. Transplant Proc 2003;35(8):3024-25 doi: 10.1016/j.transproceed.2003.10.007 published Online First.                                                                     | Transplantation Proceedings               | 2007 | Livers |    | 30 | 2004   | 2004    | No  |                                                                                                                                                                                                                                                                                                                                               | No  |                                                                                                                                                           | 0   |
| 278 | Wang YL, Zhang YY, Zhou YL, et al. T-helper and T-cytotoxic cell subsets monitoring during active cytomegalovirus infection in liver transplantation. Transplant Proc 2004;36(5):1498-99 doi: 10.1016/j.transproceed.2004.05.032 published Online First.                                            | Transplantation Proceedings               | 2003 | Livers |    | 25 | 0      | 0       | No  |                                                                                                                                                                                                                                                                                                                                               | No  |                                                                                                                                                           | 0   |
| 279 | Wang Z, Gong W, Shou D, et al. Clonal origin of hepatocellular carcinoma and recurrence after liver transplantation. Ann Transplant 2016;21:484-90 Online First.                                                                                                                                    | Transplantation Proceedings               | 2004 | Livers |    | 30 | 2002   | 2002    | No  |                                                                                                                                                                                                                                                                                                                                               | No  |                                                                                                                                                           | 0   |
| 280 | Wang Z, He JJ, Liu XY, et al. The evaluation of enteric-coated mycophenolate sodium in cardiac deceased donor liver transplant patients in China. Immunopharmacol Immunotoxicol 2015;37(6):508-12 doi: 10.3109/08923973.2015.1096286 published Online First.                                        | Annals of Transplantation                 | 2016 | Livers |    | 60 | 2007/8 | 2012/12 | Yes | The study was approved by the hospital ethics committee and was performed in compliance with the guidelines for the use of donated organs at Tianjin First Center Hospital Patients provided informed consent for the study                                                                                                                   | No  |                                                                                                                                                           | 0   |
| 281 | Wang Z, Liao J, Wu S, et al. Recipient C6 rs9200 genotype is associated with hepatocellular carcinoma recurrence after orthotopic liver transplantation in a Han Chinese population. Cancer Gene Ther 2016;23(6):157-61 doi: 10.1038/cgt.2016.7 published Online First.                             | Immunopharmacology and Immunotoxicology   | 2015 | Livers | DD | 92 | 0      | 0       | Yes | The study was performed according to recommendations of the Declaration of Helsinki in 1975, and it was approved by the ethic committee of Zhe Jiang University. Informed written consent was obtained from all patients.                                                                                                                     | No  | The liver was routinely procured from donations after cardiac death (DCD). The most common course of death was craniocerebral trauma.                     | DCD |
| 282 | Wang Z, Shi B, Jin H, et al. Low-dose of tacrolimus favors the induction of functional CD4+CD25+FoxP3+ regulatory T cells in solid-organ transplantation. Int Immunopharmacol 2009;9(5):564-69 doi: 10.1016/j.intimp.2009.01.029 published Online First.                                            | Cancer Gene Therapy                       | 2016 | Livers |    | 71 | 2007/7 | 2012/3  | Yes | This research was approved by the Institutional Review Board of the First Affiliated Hospital, Jiao Tong University, under the strict guidelines of the Ethics Committee of the hospital, the current regulation of the Chinese Government and the Declaration of Helsinki. Informed consent was obtained from all the donors and recipients. | No  |                                                                                                                                                           | 0   |
| 283 | Wang Z, Wu S, Chen D, et al. Influence of TLR4 rs1927907 locus polymorphisms on tacrolimus pharmacokinetics in the early stage after liver transplantation. Eur J Clin Pharmacol 2014;70(8):925-31 doi: 10.1007/s00228-014-1673-2 published Online First.                                           | International Immunopharmacology          | 2009 | Livers |    | 25 | 0      | 0       | Yes | This study was approved by the Medical Ethical Committee of our hospital, and an appropriate informed consent was obtained from all patients.                                                                                                                                                                                                 | No  |                                                                                                                                                           | 0   |
| 284 | Wang ZX, Fu ZR, Ding GS, et al. Prevention of hepatitis B virus reinfection after orthotopic liver transplantation. Transplant Proc 2004;36(8):2315-7 Online First.                                                                                                                                 | European Journal of Clinical Pharmacology | 2014 | Livers |    | 86 | 2007/7 | 2011/2  | Yes | The protocol was conducted in accordance with the Declaration of Helsinki and its amendments and was approved by the Ethics Committee of Shanghai Jiaotong University. All patients provided written informed consent.                                                                                                                        | No  |                                                                                                                                                           | 0   |
| 285 | Wang ZX, Song SH, Teng F, et al. A single-center retrospective analysis of liver transplantation on 255 patients with hepatocellular carcinoma. Clin Transplant 2010;24(6):752-57 doi: 10.1111/j.1399-0012.2009.01172.x published Online First.                                                     | Transplantation Proceedings               | 2004 | Livers |    | 68 | 2002/1 | 2003/7  | No  |                                                                                                                                                                                                                                                                                                                                               | No  |                                                                                                                                                           | 0   |

|     | A                                                                                                                                                                                                                                                                                                        | B                                   | C    | D      | E  | F   | G       | H       | I   | J                                                                                                                                                                                                                                                                                                                                             | K  | L | M       |
|-----|----------------------------------------------------------------------------------------------------------------------------------------------------------------------------------------------------------------------------------------------------------------------------------------------------------|-------------------------------------|------|--------|----|-----|---------|---------|-----|-----------------------------------------------------------------------------------------------------------------------------------------------------------------------------------------------------------------------------------------------------------------------------------------------------------------------------------------------|----|---|---------|
| 286 | Wang ZX, Yan LN, Wang WT, et al. Impact of pretransplant MELD score on posttransplant outcome in orthotopic liver transplantation for patients with acute-on-chronic hepatitis b liver failure. <i>Transplant Proc</i> 2007;39(5):1501-04 doi: 10.1016/j.transproceed.2007.02.070published Online First. | Clinical Transplantation            | 2010 | Livers | DD | 251 | 2001/12 | 2007/12 | No  |                                                                                                                                                                                                                                                                                                                                               | No |   | 0       |
| 287 | Wei Q, Xu X, Wang C, et al. Efficacy and safety of a steroid-free immunosuppressive regimen after liver transplantation for hepatocellular carcinoma. <i>Gut and Liver</i> 2016;10(4):604-10 doi: 10.5009/gnl15017published Online First.                                                                | Transplantation Proceedings         | 2007 | Livers |    | 42  | 1999/12 | 2005/11 | No  |                                                                                                                                                                                                                                                                                                                                               | No |   | 0       |
| 288 | Wei Y, Zhang L, Lin H, et al. Factors related to post-liver transplantation acute renal failure. <i>Transplant Proc</i> 2006;38(9):2982-84 doi: 10.1016/j.transproceed.2006.08.156published Online First.                                                                                                | Gut and Liver                       | 2016 | Livers | DD | 166 | 2009/4  | 2011/6  | Yes | Each organ donation and transplantation strictly followed the guidelines of the Ethics Committee of the First Affiliated Hospital, Zhejiang University School of Medicine (approval number: 2013-12), the current regulation of the Chinese government and the Declaration of Helsinki 2004. Informed consent was obtained from all patients. | No |   | DCD, OT |
| 289 | Wei YJ, Huang YX, Zhang XL, et al. Apolipoprotein D as a novel marker in human end-stage heart failure: A preliminary study. <i>Biomarkers</i> 2008;13(5):535-48 Online First.                                                                                                                           | Transplantation Proceedings         | 2006 | Livers |    | 82  | 1999    | 2002    | No  |                                                                                                                                                                                                                                                                                                                                               | No |   | 0       |
| 290 | Wei-lin W, Jing J, Shu-sen Z, et al. Tacrolimus dose requirement in relation to donor and recipient ABCB1 and CYP3A5 gene polymorphisms in Chinese liver transplant patients. <i>Liver Transpl</i> 2006;12(5):775-80 Online First.                                                                       | Biomarkers                          | 2008 | Hearts | DD | 6   | 0       | 0       | Yes | All patients and control subjects gave written informed consent for this investigation, which was approved by the Institutional Ethical Review Board of Fu Wai Hospital                                                                                                                                                                       | No |   | 0       |
| 291 | Wen O, Li X, Wan Q, et al. The risk factors for mortality and septic shock in liver transplant recipients with ESKAPE bacteremia. <i>Hepatology</i> 2015;62(138):246-49 doi: 10.5754/hge14092published Online First.                                                                                     | Liver Transplantation               | 2006 | Livers | DD | 50  | 2004/7  | 2005/3  | Yes | This study was conducted in accordance with the Declaration of Helsinki and its amendments.                                                                                                                                                                                                                                                   | No |   | 0       |
| 292 | Wu B, Wu H, Chen J, et al. Comparative proteomic analysis of human donor tissues during orthotopic liver transplantation: Ischemia versus reperfusion. <i>Hepatology International</i> 2013;7(1):286-98 doi: 10.1007/s12072-012-9346-7published Online First.                                            | Hepato-Gastroenterology             | 2015 | Livers |    | 37  | 2002/1  | 2013/9  | Yes | The present study was approved by the two hospitals' ethics committees.                                                                                                                                                                                                                                                                       | No |   | 0       |
| 293 | Wu CZ, Ni XJ, Zheng SL, et al. A fast SSP-PCR method for genotyping the ATP-binding cassette subfamily B member 1 gene C3435T and G2677T polymorphisms in Chinese transplant recipients. <i>Tumori</i> 2009;95(3):338-42 Online First.                                                                   | Hepatology International            | 2013 | Livers | DD | 5   | 2008/11 | 2009/3  | Yes | Written informed consent was obtained from the recipients' relatives. The study protocol was approved by the Clinical Research (Ethics) Committee of Sun-Yat-Sen University. Donor livers were obtained according to the standard multi-organ harvesting procedure.                                                                           | No |   | DCD     |
| 294 | Wu D, Shen ZY, Zhang YM, et al. Effect of liver transplantation in combined hepatocellular and cholangiocellular carcinoma: A case series. <i>BMC Cancer</i> 2015;15(1) Online First.                                                                                                                    | Tumori                              | 2009 | Livers |    | 59  | 0       | 0       | No  |                                                                                                                                                                                                                                                                                                                                               | No |   | 0       |
| 295 | Wu J, Xu X, Liang T, et al. Long-term outcome of combined liver-kidney transplantation: A single-center experience in China. <i>Hepatology</i> 2008;55(82-83):334-37 Online First.                                                                                                                       | BMC Cancer                          | 2015 | Livers | DD | 21  | 2000/4  | 2011/4  | Yes | This study was approved by the ethics committee of the First Center Hospital of Tianjin (E2014008L) and complied with the Declaration of Helsinki, and all participants provided written informed consent.                                                                                                                                    | No |   | 0       |
| 296 | Wu J, Zhu SM, He HL, et al. Plasma propofol concentrations during orthotopic liver transplantation. <i>Acta Anaesthesiol Scand</i> 2005;49(6):804-10 doi: 10.1111/j.1399-6576.2005.00671.xpublished Online First.                                                                                        | Hepato-Gastroenterology             | 2008 | Livers |    | 69  | 1999/1  | 2006/10 | Yes | Each organ donation of transplant in our center was strictly under the guideline of the Ethical Committee of Hospital and the declaration of Helsinki.                                                                                                                                                                                        | No |   | 0       |
| 297 | Wu L, Chen L, Zhou L, et al. Association of interleukin 18 gene promoter polymorphisms with HBV recurrence after liver transplantation in Han Chinese population. <i>Hepatitis Monthly</i> 2011;11(6):469-74 Online First.                                                                               | Acta Anaesthesiologica Scandinavica | 2005 | Livers |    | 10  | 0       | 0       | Yes | The study was approved by our Clinical Research Committee and informed consent...                                                                                                                                                                                                                                                             | No |   | 0       |
| 298 | Wu L, Hu A, Tam N, et al. Salvage liver transplantation for patients with recurrent hepatocellular carcinoma after curative resection. <i>PLoS One</i> 2012;7(7) doi: 10.1371/journal.pone.0041820published Online First.                                                                                | Hepatitis Monthly                   | 2011 | Livers |    | 125 | 2004    | 2008    | Yes | Informed consent was obtained from all participants; the study was approved by the Ethical Review Committee of the First Affiliated Hospital, School of Medicine, Zhejiang University.                                                                                                                                                        | No |   | 0       |
| 299 | Wu L, Tam N, Deng R, et al. Steroid-resistant acute rejection after cadaveric liver transplantation: Experience from one single center. <i>Clinics and Research in Hepatology and Gastroenterology</i> 2014;38(5):592-97 doi: 10.1016/j.clinre.2014.04.005published Online First.                        | PLoS ONE                            | 2012 | Livers | DD | 339 | 2004    | 2008    | Yes | Prior to the study, the protocol, which was in accordance with the ethical guidelines of the 1975 Helsinki Declaration, was approved by the institutional ethics committee of the First Affiliated Hospital of Sun Yat-sen University. Written, informed consent was obtained from all subjects                                               | No |   | 0       |

|     | A                                                                                                                                                                                                                                                                                                  | B                                                       | C    | D      | E  | F   | G      | H       | I   | J                                                                                                                                                                                                                                                                                                                                            | K  | L | M |
|-----|----------------------------------------------------------------------------------------------------------------------------------------------------------------------------------------------------------------------------------------------------------------------------------------------------|---------------------------------------------------------|------|--------|----|-----|--------|---------|-----|----------------------------------------------------------------------------------------------------------------------------------------------------------------------------------------------------------------------------------------------------------------------------------------------------------------------------------------------|----|---|---|
| 300 | Wu L, Xu X, Shen J, et al. MDR1 gene polymorphisms and risk of recurrence in patients with hepatocellular carcinoma after liver transplantation. <i>J Surg Oncol</i> 2007;96(1):62-68 doi: 10.1002/jso.20774 published Online First.                                                               | Clinics and Research in Hepatology and Gastroenterology | 2014 | Livers | DD | 962 | 2004   | 2012    | Yes | Prior to the study, the protocol was approved by our local institutional ethics committee. Each organ donation and transplant in our center was performed strictly according to the guidelines of the 1975 Helsinki Declaration and the principles of the Declaration of Istanbul; written, informed consent was obtained from all subjects. | No |   | 0 |
| 301 | Wu L, Zhang J, Guo Z, et al. Diagnosis and treatment of acute appendicitis after orthotopic liver transplant in adults. <i>Exp Clin Transplant</i> 2011;9(2):113-17 Online First.                                                                                                                  | Journal of Surgical Oncology                            | 2007 | Livers |    | 99  | 2003/2 | 2006/9  | No  |                                                                                                                                                                                                                                                                                                                                              | No |   | 0 |
| 302 | Wu L, Zhang J, Guo Z, et al. Hepatic artery thrombosis after orthotopic liver transplant: A review of the same institute 5 years later. <i>Exp Clin Transplant</i> 2011;9(3):191-96 Online First.                                                                                                  | Experimental and Clinical Transplantation               | 2011 | Livers |    | 8   | 2000/1 | 2007/12 | Yes | Each organ donation and transplant was approved by our local institutional ethics committee, and conformed with the ethical guidelines of the 1975 Helsinki Declaration.                                                                                                                                                                     | No |   | 0 |
| 303 | Wu LM, Xie HY, Zhou L, et al. A single nucleotide polymorphism in the vascular endothelial growth factor gene is associated with recurrence of hepatocellular carcinoma after transplantation. <i>Arch Med Res</i> 2009;40(7):565-70 doi: 10.1016/j.arcmed.2009.07.011 published Online First.     | Experimental and Clinical Transplantation               | 2011 | Livers |    | 726 | 2004   | 2009    | Yes | Before the study, the protocol was approved by our local institutional ethics committee; each organ donation and transplant in our center was performed strictly according to the guidelines of the 1975 Helsinki Declaration; and written, informed consent was obtained from all subjects.                                                 | No |   | 0 |
| 304 | Wu LM, Yang Z, Zhou L, et al. Identification of histone deacetylase 3 as a biomarker for tumor recurrence following liver transplantation in HBV-associated hepatocellular carcinoma. <i>PLoS One</i> 2010;5(12) doi: 10.1371/journal.pone.0014460 published Online First.                         | Archives of Medical Research                            | 2009 | Livers |    | 93  | 2003/2 | 2006/2  | Yes | This study protocol was approved by the Ethical Review Committee of the First Affiliated Hospital, School of Medicine, Zhejiang University, and informed consent was obtained according to the Declaration of Helsinki.                                                                                                                      | No |   | 0 |
| 305 | Wu LM, Zhang F, Xie HY, et al. MMP2 promoter polymorphism (C-1306T) and risk of recurrence in patients with hepatocellular carcinoma after transplantation. <i>Clin Genet</i> 2008;73(3):273-78 doi: 10.1111/j.1399-0004.2007.00955.x published Online First.                                      | PLoS ONE                                                | 2010 | Livers |    | 43  | 2003   | 2005    | Yes | The study protocol was approved by the Institutional Review Board of Key Lab of Combined Multi-organ Transplantation, Ministry of Public Health. Informed written consent was obtained according to the Declaration of Helsinki                                                                                                              | No |   | 0 |
| 306 | Wu LM, Zhang F, Zhou L, et al. Predictive value of CpG island methylator phenotype for tumor recurrence in hepatitis B virus-associated hepatocellular carcinoma following liver transplantation. <i>BMC Cancer</i> 2010;10 doi: 10.1186/1471-2407-10-399 published Online First.                  | Clinical Genetics                                       | 2008 | Livers |    | 93  | 2003/2 | 2006/2  | Yes | This study was approved by local ethic committee, and informed consent was obtained according to the Declaration of Helsinki                                                                                                                                                                                                                 | No |   | 0 |
| 307 | Wu Y, Cai B, Tang J, et al. Tacrolimus may induce the production of nucleolar anti-nuclear antibody in liver transplant patients. <i>J Gastrointest Liver Dis</i> 2011;20(3):267-70 Online First.                                                                                                  | BMC Cancer                                              | 2010 | Livers |    | 65  | 2003   | 2005    | Yes | This study was approved by local ethic committee, and informed consent was obtained according to the Declaration of Helsinki                                                                                                                                                                                                                 | No |   | 0 |
| 308 | Wu ZW, Lu HF, Wu J, et al. Assessment of the fecal lactobacilli population in patients with hepatitis B virus-related decompensated cirrhosis and hepatitis B cirrhosis treated with liver transplant. <i>Microb Ecol</i> 2012;63(4):929-37 doi: 10.1007/s00248-011-9945-1 published Online First. | Journal of Gastrointestinal and Liver Diseases          | 2011 | Livers |    | 94  | 2007   | 2010    | Yes | This study has been approved by the Ethics Committee of the West China Hospital of Sichuan University. Written informed consent was obtained from each participant.                                                                                                                                                                          | No |   | 0 |
| 309 | Xia D, Yan LN, Li B, et al. Orthotopic liver transplantation for incurable alveolar echinococcosis: Report of five cases from west China. <i>Transplant Proc</i> 2005;37(5):2181-84 doi: 10.1016/j.transproceed.2005.03.111 published Online First.                                                | Microbial Ecology                                       | 2012 | Livers |    | 74  | 0      | 0       | Yes | The project was approved by the Ethical Committee of the First Affiliated Hospital of Zhejiang University School of Medicine (Hangzhou, China).                                                                                                                                                                                              | No |   | 0 |
| 310 | Xia D, Yan LN, Xu L, et al. Postoperative Severe Pneumonia in Adult Liver Transplant Recipients. <i>Transplant Proc</i> 2006;38(9):2974-78 doi: 10.1016/j.transproceed.2006.08.184 published Online First.                                                                                         | Transplantation Proceedings                             | 2005 | Livers |    | 5   | 2001/4 | 2002/11 | No  |                                                                                                                                                                                                                                                                                                                                              | No |   | 0 |
| 311 | Xia W, Ke Q, Guo H, et al. Expansion of the Milan criteria without any sacrifice: Combination of the Hangzhou criteria with the pre-transplant platelet-to-lymphocyte ratio. <i>BMC Cancer</i> 2017;17(1) Online First.                                                                            | Transplantation Proceedings                             | 2006 | Livers |    | 132 | 1999/2 | 2004/4  | No  |                                                                                                                                                                                                                                                                                                                                              | No |   | 0 |
| 312 | Xia W, Ke Q, Wang Y, et al. Donation after cardiac death liver transplantation: Graft quality evaluation based on pretransplant liver biopsy. <i>Liver Transpl</i> 2015;21(6):838-46 doi: 10.1002/lt.24123 published Online First.                                                                 | BMC Cancer                                              | 2017 | Livers |    | 343 | 2003/1 | 2013/12 | Yes | Ethical approval was obtained from the Committee of Ethics in Biomedical Research of Zhejiang University and conformed to the ethical guidelines of the Declaration of Helsinki. Written informed consent was obtained from all participants.                                                                                                | No |   | 0 |

|     | A                                                                                                                                                                                                                                                                                              | B                                          | C    | D      | E  | F   | G       | H       | I   | J                                                                                                                                                                                                                                                                                                                                                                                                                                                 | K   | L                                                                                                                                                                                                                                                                                                                                                                                                                                                 | M   |
|-----|------------------------------------------------------------------------------------------------------------------------------------------------------------------------------------------------------------------------------------------------------------------------------------------------|--------------------------------------------|------|--------|----|-----|---------|---------|-----|---------------------------------------------------------------------------------------------------------------------------------------------------------------------------------------------------------------------------------------------------------------------------------------------------------------------------------------------------------------------------------------------------------------------------------------------------|-----|---------------------------------------------------------------------------------------------------------------------------------------------------------------------------------------------------------------------------------------------------------------------------------------------------------------------------------------------------------------------------------------------------------------------------------------------------|-----|
| 313 | Xia W, Ke Q, Wang Y, et al. Predictive value of pre-transplant platelet to lymphocyte ratio for hepatocellular carcinoma recurrence after liver transplantation. <i>World J Surg Oncol</i> 2015;13(1) doi: 10.1186/s12957-015-0472-2published Online First.                                    | Liver Transplantation                      | 2015 | Livers | DD | 127 | 2010/10 | 2014/4  | Yes | Informed consent was obtained from all participants, and the study protocol conformed to the ethical guidelines of the 1975 Declaration of Helsinki. This was reflected in a priori approval of the study by the Committee of Ethics in Biomedical Research of Zhejiang University.                                                                                                                                                               | No  |                                                                                                                                                                                                                                                                                                                                                                                                                                                   | DCD |
| 314 | Xia ZW, Jun CY, Hao C, et al. The occurrence of diarrhea not related to the pharmacokinetics of MPA and its metabolites in liver transplant patients. <i>Eur J Clin Pharmacol</i> 2010;66(7):671-79 doi: 10.1007/s00228-010-0833-2published Online First.                                      | World Journal of Surgical Oncology         | 2015 | Livers | DD | 302 | 2003/1  | 2013/12 | Yes | Ethical approval was obtained from the Committee of Ethics in Biomedical Research of Zhejiang University and conformed to the ethical guidelines of the Declaration of Helsinki. Written informed consents were obtained from all participants.                                                                                                                                                                                                   | No  |                                                                                                                                                                                                                                                                                                                                                                                                                                                   | 0   |
| 315 | Xiao H, Tong R, Cheng S, et al. BAG3 and HIF-1 alpha coexpression detected by immunohistochemistry correlated with prognosis in hepatocellular carcinoma after liver transplantation. <i>BioMed Research International</i> 2014;2014 Online First.                                             | European Journal of Clinical Pharmacology  | 2010 | Livers |    | 67  | 2005/5  | 2008/8  | Yes | The study design was approved by the independent ethics committee of Ruijin Hospital, and the procedure was described in detail to all patients before admission; informed consent was obtained                                                                                                                                                                                                                                                   | No  |                                                                                                                                                                                                                                                                                                                                                                                                                                                   | 0   |
| 316 | Xiao L, Fu ZR, Ding GS, et al. Liver transplantation for Hepatitis B virus-related hepatocellular carcinoma: one center's experience in China. <i>Transplant Proc</i> 2009;41(5):1717-21 doi: 10.1016/j.transproceed.2009.03.058published Online First.                                        | BioMed Research International              | 2014 | Livers |    | 40  | 2005    | 2010    | Yes | Letters of consent were obtained from all patients, and the experimental protocols were approved by the local ethics committee.                                                                                                                                                                                                                                                                                                                   | No  |                                                                                                                                                                                                                                                                                                                                                                                                                                                   | 0   |
| 317 | Xiao L, Fu ZR, Ding GS, et al. Prediction of survival after liver transplantation for chronic severe hepatitis b based on preoperative prognostic scores: A single center's experience in China. <i>World J Surg</i> 2009;33(11):2420-26 doi: 10.1007/s00268-009-0183-3published Online First. | Transplantation Proceedings                | 2009 | Livers | DD | 244 | 2001/12 | 2006/12 | No  |                                                                                                                                                                                                                                                                                                                                                                                                                                                   | No  |                                                                                                                                                                                                                                                                                                                                                                                                                                                   | 0   |
| 318 | Xiao M, Xu X, Zhu H, et al. Efficacy and safety of basiliximab in liver transplantation for patients with hepatitis B virus-related diseases: A single centre study. <i>Int J Clin Pract</i> 2015;69(S183):35-42 doi: 10.1111/ijcp.12665published Online First.                                | World Journal of Surgery                   | 2009 | Livers | DD | 137 | 2002/8  | 2007/11 | Yes | None of the donors included in this study were prisoners who died as a result of execution. The hospital committee of ethical issues reviewed their written applications and supporting documents to make sure that they were well informed and made the decision by their own or their near relatives before voting for permission. According to our regulations, the clinical team began the procedure after receiving the written permissions. | Yes | None of the donors included in this study were prisoners who died as a result of execution. The hospital committee of ethical issues reviewed their written applications and supporting documents to make sure that they were well informed and made the decision by their own or their near relatives before voting for permission. According to our regulations, the clinical team began the procedure after receiving the written permissions. | DCD |
| 319 | Xie BX, Zhu YM, Chen C, et al. Outcome of TINI stent treatments in symptomatic central airway stenoses caused by <i>Aspergillus fumigatus</i> infections after lung transplantation. <i>Transplant Proc</i> 2013;45(6):2366-70 doi: 10.1016/j.transproceed.2013.02.129published Online First.  | International Journal of Clinical Practice | 2015 | Livers |    | 268 | 2008/6  | 2011/3  | Yes | Institutional Review Board approval and informed consent in writing was obtained for each individual. The liver donation or transplant of each case conformed strictly to the regulations of the Ethical Committee in our hospital and the Declaration of Helsinki.                                                                                                                                                                               | No  |                                                                                                                                                                                                                                                                                                                                                                                                                                                   | 0   |
| 320 | Xie HY, Wang WL, Yao MY, et al. Polymorphisms in cytokine genes and their association with acute rejection and recurrence of Hepatitis B in Chinese liver transplant recipients. <i>Arch Med Res</i> 2008;39(4):420-28 doi: 10.1016/j.arcmed.2008.01.003published Online First.                | Transplantation Proceedings                | 2013 | Lungs  |    | 24  | 2003/1  | 2010/6  | Yes | This study was approved by the Institutional Review Board at Shanghai No. 1 Pulmonary Hospital.                                                                                                                                                                                                                                                                                                                                                   | No  |                                                                                                                                                                                                                                                                                                                                                                                                                                                   | 0   |
| 321 | Xie M, Rao W, Sun LY, et al. Tacrolimus-related seizure after pediatric liver transplantation - A single-center experience. <i>Pediatr Transplant</i> 2014;18(1):58-63 doi: 10.1111/ptr.12198published Online First.                                                                           | Archives of Medical Research               | 2008 | Livers |    | 186 | 2003    | 2005    | Yes | The local Ethics Committee approved the study, and informed written consent was obtained from all individuals.                                                                                                                                                                                                                                                                                                                                    | No  |                                                                                                                                                                                                                                                                                                                                                                                                                                                   | 0   |
| 322 | Xie M, Rao W, Yang T, et al. Occult hepatitis B virus infection predicts de novo hepatitis B infection in patients with alcoholic cirrhosis after liver transplantation. <i>Liver International</i> 2015;35(3):897-904 doi: 10.1111/liv.12567published Online First.                           | Pediatric Transplantation                  | 2014 | Livers | DD | 13  | 2007/1  | 2010/12 | Yes | Conduct of our study was approved by the ethical affairs committee of Tianjin First Central Hospital and adhered to the tenets of the Declaration of Helsinki. Written informed consent was obtained from the patients' parents or guardians.                                                                                                                                                                                                     | No  |                                                                                                                                                                                                                                                                                                                                                                                                                                                   | 0   |
| 323 | Xie SB, Zhu JY, Ying Z, et al. Prevention and risk factors of the HBV recurrence after orthotopic liver transplantation: 160 cases follow-up study. <i>Transplantation</i> 2010;90(7):786-90 doi: 10.1097/TP.0b013e3181f09c89published Online First.                                           | Liver International                        | 2015 | Livers |    | 65  | 2008/6  | 2012/6  | Yes | The conduct of our study was approved by the Ethical Affairs committee of Tianjin First Central Hospital and adhered to the tenets of the Declaration of Helsinki. Written informed consent was obtained from the patients or guardians                                                                                                                                                                                                           | No  |                                                                                                                                                                                                                                                                                                                                                                                                                                                   | 0   |



|     | A                                                                                                                                                                                                                                                                                                                                                                                | B                                                          | C    | D      | E  | F   | G       | H       | I   | J                                                                                                                                                                                                                                                                                                                    | K   | L                                                                                                                | M  |
|-----|----------------------------------------------------------------------------------------------------------------------------------------------------------------------------------------------------------------------------------------------------------------------------------------------------------------------------------------------------------------------------------|------------------------------------------------------------|------|--------|----|-----|---------|---------|-----|----------------------------------------------------------------------------------------------------------------------------------------------------------------------------------------------------------------------------------------------------------------------------------------------------------------------|-----|------------------------------------------------------------------------------------------------------------------|----|
| 324 | Xing T, Huang L, Yu Z, et al. Comparison of Steroid-Free Immunosuppression and Standard Immunosuppression for Liver Transplant Patients with Hepatocellular Carcinoma. PLoS One 2013;8(8) doi: 10.1371/journal.pone.0071251 published Online First.                                                                                                                              | Transplantation                                            | 2010 | Livers | DD | 160 | 2003/10 | 2008/8  | No  |                                                                                                                                                                                                                                                                                                                      | No  |                                                                                                                  | 0  |
| 325 | Xing T, Qiu G, Zhong L, et al. Calcitriol reduces the occurrence of acute cellular rejection of liver transplants: A prospective controlled study. Pharmazie 2013;68(10):821-26 doi: 10.1691/ph.2013.3561 published Online First.                                                                                                                                                | PLoS ONE                                                   | 2013 | Livers | DD | 178 | 2003/1  | 2009/12 | Yes | The study was approved by the ethics committee of the hospital, and followed the principles of the Declaration of Helsinki. Written consent was given by the patients for their information to be stored in the hospital database and used for research.                                                             | No  |                                                                                                                  | 0  |
| 326 | Xing T, Zhong L, Chen D, et al. Experience of combined liver-kidney transplantation for acute-on-chronic liver failure patients with renal dysfunction. Transplant Proc 2013;45(6):2307-13 doi: 10.1016/j.transproceed.2013.02.127 published Online First.                                                                                                                       | Pharmazie                                                  | 2013 | Livers |    | 75  | 2010/3  | 2011/3  | Yes | The study protocol was approved by the local institutional review board at the authors' affiliated institution and informed written consent was obtained from the patients or their legal surrogates. The study was carried out following good clinical practice and in accordance with the Declaration of Helsinki. | No  |                                                                                                                  | 0  |
| 327 | Xing T, Zhong L, Chen D, et al. Experience of combined liver-kidney transplantation for acute-on-chronic liver failure patients with renal dysfunction. [Erratum appears in Transplant Proc 2013 Sep;45(7):2859]. Transplant Proc 2013;45(6):2307-13 Online First.                                                                                                               | Transplantation Proceedings                                | 2013 | Livers | DD | 133 | 2001/1  | 2009/12 | Yes | The study, approved by the hospital ethics committee, followed the principles of the Declaration of Helsinki                                                                                                                                                                                                         | No  |                                                                                                                  | 0  |
| 328 | Xing T, Zhong L, Lin L, et al. Immunity of fungal infections alleviated graft reject in liver transplantation compared with non-fungal recipients. Int J Clin Exp Pathol 2015;8(3):2603-14 Online First.                                                                                                                                                                         | Transplantation Proceedings                                | 2013 | Livers | DD | 133 | 2001/1  | 2009/12 | Yes | The study, approved by the hospital ethics committee, followed the principles of the Declaration of Helsinki.                                                                                                                                                                                                        | No  |                                                                                                                  | 0  |
| 329 | Xing T, Zhong L, Qiu G, et al. Evolution of CD4 <sup>+</sup> CD25 <sup>hi</sup> T cell subsets in Aspergillus-infected liver transplantation recipients reduces the incidence of transplantation rejection via upregulating the production of anti-inflammatory cytokines. Genetics and Molecular Research 2014;13(3):4932-39 doi: 10.4238/2014.July.4.7 published Online First. | International Journal of Clinical & Experimental Pathology | 2015 | Livers | DD | 168 | 2010/1  | 2012/6  | Yes | This study was approved by the institutional review board of the Shanghai Jiao Tong University and was performed in accordance with the Declaration of Helsinki.                                                                                                                                                     | No  |                                                                                                                  | 0  |
| 330 | Xing T, Zhong L, Qiu G, et al. Evolution of CD4 <sup>+</sup> CD25 <sup>hi</sup> T cell subsets in Aspergillus-infected liver transplantation recipients reduces the incidence of transplantation rejection via upregulating the production of anti-inflammatory cytokines. Genetics and Molecular Research 2014;13(3):4932-39 Online First.                                      | Genetics and Molecular Research                            | 2014 | Livers |    | 75  | 2010/3  | 2011/3  | No  |                                                                                                                                                                                                                                                                                                                      | No  |                                                                                                                  | 0  |
| 331 | Xu G, Li LL, Sun ZT, et al. Effects of dexmedetomidine on postoperative cognitive dysfunction and serum levels of $\beta$ -amyloid and neuronal microtubule-associated protein in orthotopic liver transplantation patients. Ann Transplant 2016;21:508-15 doi: 10.12659/AOT.899340 published Online First.                                                                      | Genetics and Molecular Research                            | 2014 | Livers |    | 75  | 2010/3  | 2011/3  | No  |                                                                                                                                                                                                                                                                                                                      | No  |                                                                                                                  | 0  |
| 332 | Xu H, Li W, Xu Z, et al. Evaluation of the right ventricular ejection fraction during classic orthotopic liver transplantation without venovenous bypass. Clin Transplant 2012;26(5):E485-E91 doi: 10.1111/ctr.12010 published Online First.                                                                                                                                     | Annals of Transplantation                                  | 2016 | Livers |    | 80  | 2014/12 | 2015/12 | Yes | The study was approved by the Ethics Committee of Zhengzhou University. Written consent was obtained from all patients.                                                                                                                                                                                              | No  |                                                                                                                  | 0  |
| 333 | Xu J, Shen ZY, Chen XG, et al. A randomized controlled trial of licartin for preventing hepatoma recurrence after liver transplantation. Hepatology 2007;45(2):269-76 doi: 10.1002/hep.21465 published Online First.                                                                                                                                                             | Clinical Transplantation                                   | 2012 | Livers |    | 30  | 0       | 0       | Yes | After obtaining informed written consent from patients and the approval of Chinese Ethics Committee of Registering Clinical Trial (2011001)                                                                                                                                                                          | No  |                                                                                                                  | OT |
| 334 | Xu L, Li X, Xu M, et al. Perioperative use of ECMO during double lung transplantation. ASAIO J 2009;55(3):255-58 doi: 10.1097/MAT.0b013e3181a05795 published Online First.                                                                                                                                                                                                       | Hepatology                                                 | 2007 | Livers | DD | 60  | 2004/7  | 2004/11 | Yes | The study was approved by the Medical Ethics Committee, and the patients provided written informed consent for the study                                                                                                                                                                                             | Yes | donor livers were from cadaver donors who voluntarily donated). No organs were obtained from executed prisoners. | 0  |
| 335 | Xu L, Xu MQ, Yan LN, et al. Causes of mortality after liver transplantation: A single center experience in mainland China. Hepatogastroenterology 2012;59(114):481-84 doi: 10.5754/hge11419 published Online First.                                                                                                                                                              | ASAIO Journal                                              | 2009 | Lungs  | DD | 9   | 2002    | 2006    | No  |                                                                                                                                                                                                                                                                                                                      | No  |                                                                                                                  | 0  |
| 336 | Xu SL, Zhang YC, Wang GY, et al. Survival analysis of sirolimus-based immunosuppression in liver transplantation in patients with hepatocellular carcinoma. Clinics and Research in Hepatology and Gastroenterology 2016;40(6):674-81 Online First.                                                                                                                              | Hepato-Gastroenterology                                    | 2012 | Livers | DD | 472 | 1999/2  | 2009/12 | No  |                                                                                                                                                                                                                                                                                                                      | No  |                                                                                                                  | 0  |

|     | A                                                                                                                                                                                                                                                                            | B                                                           | C    | D      | E  | F   | G      | H       | I   | J                                                                                                                                                                                                                                                                                                                                                            | K   | L                                                                                                                                                                                              | M |
|-----|------------------------------------------------------------------------------------------------------------------------------------------------------------------------------------------------------------------------------------------------------------------------------|-------------------------------------------------------------|------|--------|----|-----|--------|---------|-----|--------------------------------------------------------------------------------------------------------------------------------------------------------------------------------------------------------------------------------------------------------------------------------------------------------------------------------------------------------------|-----|------------------------------------------------------------------------------------------------------------------------------------------------------------------------------------------------|---|
| 337 | Xu X, Guo HJ, Xie HY, et al. ZIP4, a novel determinant of tumor invasion in hepatocellular carcinoma, contributes to tumor recurrence after liver transplantation. <i>Int J Biol Sci</i> 2014;10(3):245-56 doi: 10.7150/ijbs.7401published Online First.                     | Clinics and Research in Hepatology and Gastroenterology     | 2016 | Livers |    | 142 | 2006/1 | 2012/1  | Yes | The study protocol was approved by the Research Ethics Committee of the Third Affiliated Hospital of Sun Yat-sen University, and informed consent was obtained from all participants.                                                                                                                                                                        | No  |                                                                                                                                                                                                | 0 |
| 338 | Xu X, Ke QH, Shao ZX, et al. The value of serum $\alpha$ -fetoprotein in predicting tumor recurrence after liver transplantation for hepatocellular carcinoma. <i>Dig Dis Sci</i> 2009;54(2):385-88 doi: 10.1007/s10620-008-0349-0published Online First.                    | International Journal of Biological Sciences                | 2014 | Livers |    | 60  | 2002   | 2009    | Yes | The study protocol was approved by the Institutional Review Board of the Key Lab of Combined Multi-Organ Transplantation, Ministry of Public Health. Informed written consent was obtained from patients in accordance with the Declaration of Helsinki.                                                                                                     | Yes | No donor liver was harvested from an executed prisoner                                                                                                                                         | 0 |
| 339 | Xu X, Ling Q, Gao F, et al. Hepatoprotective effects of marine and kuhuang in liver transplant recipients. <i>Am J Chin Med</i> 2009;37(1):27-34 Online First.                                                                                                               | Digestive Diseases and Sciences                             | 2009 | Livers |    | 97  | 2004/2 | 2006/12 | No  |                                                                                                                                                                                                                                                                                                                                                              | No  |                                                                                                                                                                                                | 0 |
| 340 | Xu X, Ling Q, Wang J, et al. Donor miR-196a-2 polymorphism is associated with hepatocellular carcinoma recurrence after liver transplantation in a Han Chinese population. <i>Int J Cancer</i> 2016;138(3):620-29 Online First.                                              | American Journal of Chinese Medicine                        | 2009 | Livers | DD | 151 | 2003/9 | 2006/1  | Yes | The ethical committee of Zhejiang University approved this prospective randomized trial. ... Informed consents were obtained from all donors and recipients before transplantation. Organ donation for transplantation was approved by Zhejiang Organ Transplant Committee                                                                                   | Yes | DONORS gave informed consent                                                                                                                                                                   | 0 |
| 341 | Xu X, Ling Q, Wu J, et al. A novel prognostic model based on serum levels of total bilirubin and creatinine early after liver transplantation. <i>Liver International</i> 2007;27(6):816-24 doi: 10.1111/j.1478-3231.2007.01494.xpublished Online First.                     | International Journal of Cancer                             | 2016 | Livers |    | 155 | 2007/1 | 2011/3  | Yes | Each organ donation or transplant was approved by the Institutional Review Board at the First Affiliated Hospital, Zhejiang University, under the strict guidelines of the Ethics Committee of the hospital, the current regulation of the Chinese Government and the Declaration of Helsinki. Informed consent was obtained from all donors and recipients. | Yes | No donor organs were obtained from executed prisoners.                                                                                                                                         | 0 |
| 342 | Xu X, Ling Q, Zhang M, et al. Outcome of patients with hepatorenal syndrome type 1 after liver transplantation: Hangzhou experience. <i>Transplantation</i> 2009;87(10):1514-19 doi: 10.1097/TP.0b013e3181a4430bpublished Online First.                                      | Liver International                                         | 2007 | Livers | DD | 199 | 2003/1 | 2006/9  | Yes | Each organ donation or transplant in our centre was strictly according to the guidelines of the Ethical Committee of our hospital, the regulation of Organ Transplant Committee of Zhejiang province and the declaration of Helsinki.                                                                                                                        | No  |                                                                                                                                                                                                | 0 |
| 343 | Xu X, Liu X, Ling Q, et al. Artificial liver support system combined with liver transplantation in the treatment of patients with acute-on-chronic liver failure. <i>PLoS One</i> 2013;8(3) doi: 10.1371/journal.pone.0058738published Online First.                         | Transplantation                                             | 2009 | Livers | DD | 32  | 2003/1 | 2006/3  | No  |                                                                                                                                                                                                                                                                                                                                                              | Yes | Informed consents were obtained from all donors and recipients before transplantation. Organ donation for transplantation was approved by the Organ Transplant Committee in Zhejiang Province. | 0 |
| 344 | Xu X, Qu K, Wan Y, et al. Tumor existence and tumor size as prognostic factors in hepatitis B virus-related cirrhosis patients who underwent liver transplantation. <i>Transplant Proc</i> 2014;46(5):1389-92 doi: 10.1016/j.transproceed.2014.01.011published Online First. | PLoS ONE                                                    | 2013 | Livers |    | 171 | 2001/1 | 2009/12 | Yes | This study was approved by the First Affiliated Hospital, Zhejiang University School of Medicine and the current regulation of the Chinese Government, and the Declaration of Helsinki were strictly followed for each organ donation and transplant performed in our center                                                                                 | Yes | No donor livers were harvested from executed prisoners                                                                                                                                         | 0 |
| 345 | Xu X, Tu Z, Wang B, et al. A novel model for evaluating the risk of hepatitis B recurrence after liver transplantation. <i>Liver International</i> 2011;31(10):1477-84 doi: 10.1111/j.1478-3231.2011.02500.xpublished Online First.                                          | Transplantation Proceedings                                 | 2014 | Livers |    | 111 | 2002/8 | 2012/3  | Yes | The procedures were conducted in accordance with the standards of the Declaration of Helsinki and current ethical guidelines, and written informed consents were obtained from all of the patients.                                                                                                                                                          | No  |                                                                                                                                                                                                | 0 |
| 346 | Xu ZD, Xu HT, Li WW, et al. Influence of preoperative diastolic dysfunction on hemodynamics and outcomes of patients undergoing orthotopic liver transplantation. <i>Int J Clin Exp Med</i> 2013;6(5):351-57 Online First.                                                   | Liver International                                         | 2011 | Livers | DD | 185 | 2006/1 | 2008/12 | Yes | The guidelines of the Ethics Committee of our hospital, the current regulation of the Chinese Government and the Declaration of Helsinki were strictly followed for each organ donation and transplant performed in our centre.                                                                                                                              | Yes | No donor livers were harvested from executed prisoners.                                                                                                                                        | 0 |
| 347 | Xue F, Higgs BW, Huang J, et al. HERCS is a prognostic biomarker for post-liver transplant recurrent human hepatocellular carcinoma. <i>J Transl Med</i> 2015;13(1) doi: 10.1186/s12967-015-0743-2published Online First.                                                    | International Journal of Clinical and Experimental Medicine | 2013 | Livers | DD | 330 | 2005/1 | 2009/12 | No  |                                                                                                                                                                                                                                                                                                                                                              | No  |                                                                                                                                                                                                | 0 |
| 348 | Xue F, Zhang J, Han L, et al. Immune cell functional assay in monitoring of adult liver transplantation recipients with infection. <i>Transplantation</i> 2010;89(5):620-26 doi: 10.1097/TP.0b013e3181c690fapublished Online First.                                          | Journal of Translational Medicine                           | 2015 | Livers |    | 21  | 2008   | 2012    | Yes | Informed written consent was obtained from each patient and the study protocol conformed to the ethical guidelines of the 1975 Declaration of Helsinki as reflected in a priori approval by the Ethics Committee of Renji Hospital                                                                                                                           | Yes | No donor organs were obtained from executed prisoners or other institutionalized persons                                                                                                       | 0 |

|     | A                                                                                                                                                                                                                                                                                               | B                                                               | C    | D      | E  | F   | G       | H       | I   | J                                                                                                                                                                                                                                                                       | K   | L                                                                                                                                                                                                                                                                                                      | M |
|-----|-------------------------------------------------------------------------------------------------------------------------------------------------------------------------------------------------------------------------------------------------------------------------------------------------|-----------------------------------------------------------------|------|--------|----|-----|---------|---------|-----|-------------------------------------------------------------------------------------------------------------------------------------------------------------------------------------------------------------------------------------------------------------------------|-----|--------------------------------------------------------------------------------------------------------------------------------------------------------------------------------------------------------------------------------------------------------------------------------------------------------|---|
| 349 | Xue J, Wang L, Chen CM, et al. Acute kidney injury influences mortality in lung transplantation. <i>Ren Fail</i> 2014;36(4):541-45 doi: 10.3109/0886022X.2013.876350published Online First.                                                                                                     | Transplantati on                                                | 2010 | Livers |    | 79  | 2008/4  | 2009/1  | No  |                                                                                                                                                                                                                                                                         | No  |                                                                                                                                                                                                                                                                                                        | 0 |
| 350 | Xue M, Lv C, Chen X, et al. Donor liver steatosis: A risk factor for early new-onset diabetes after liver transplantation. <i>Journal of Diabetes Investigation</i> 2017;8(2):181-87 doi: 10.1111/jdi.12560published Online First.                                                              | Renal Failure                                                   | 2014 | Lungs  |    | 88  | 2002/9  | 2011/12 | Yes | All transplantations were approved by the ethics committee of Wuxi People's Hospital                                                                                                                                                                                    | No  |                                                                                                                                                                                                                                                                                                        | 0 |
| 351 | Xue M, Lv C, Chen X, et al. Effect of interleukin-2 receptor antagonists on new-onset diabetes after liver transplantation: A retrospective cohort study. <i>Journal of Diabetes</i> 2015 Online First.                                                                                         | Journal of Diabetes Investigation                               | 2017 | Livers |    | 739 | 2001/4  | 2014/12 | Yes | The study was approved by the institutional review board of Zhongshan Hospital, Fudan University, and all participants provided informed consent                                                                                                                        | No  |                                                                                                                                                                                                                                                                                                        | 0 |
| 352 | Yambe T, Meng X, Hou X, et al. Cardio-ankle vascular index (CAVI) for the monitoring of the atherosclerosis after heart transplantation. <i>Biomed Pharmacother</i> 2005;59(SUPPL. 1):S177-S79 doi: 10.1016/S0753-3322(05)80028-9published Online First.                                        | Journal of Diabetes.                                            | 2015 | Livers |    | 757 | 2001/4  | 2014/12 | Yes | All study participants provided informed consent, and the study was approved by the institutional review board of Zhongshan Hospital, Fudan University, and therefore complied with the ethical standards of the Declaration of Helsinki, as revised in Brazil in 2013. | No  |                                                                                                                                                                                                                                                                                                        | 0 |
| 353 | Yan L, Li B, Wen T, et al. Prophylaxis against hepatitis B recurrence posttransplantation using lamivudine and individualized low-dose hepatitis B immunoglobulin. <i>Am J Transplant</i> 2010;10(8):1861-69 Online First.                                                                      | Biomedicine and Pharmacotherapy                                 | 2005 | Hearts | DD | 7   | 0       | 0       | No  |                                                                                                                                                                                                                                                                         | No  |                                                                                                                                                                                                                                                                                                        | 0 |
| 354 | Yan S, Tu Z, Lu W, et al. Clinical utility of an automated pupillometer for assessing and monitoring recipients of liver transplantation. <i>Liver Transpl</i> 2009;15(12):1718-27 doi: 10.1002/lt.21924published Online First.                                                                 | Liver Transplantati on                                          | 2009 | Livers |    | 183 | 2007/1  | 2009/1  | Yes | This study was reviewed and approved by the Committee of Ethics in Biomedical Research of Zhejiang University                                                                                                                                                           | No  |                                                                                                                                                                                                                                                                                                        | 0 |
| 355 | Yang CH, He XS, Chen J, et al. Fungal infection in patients after liver transplantation in years 2003 to 2012. <i>Ann Transplant</i> 2012;17(4):59-63 doi: 10.12659/AOT.883695published Online First.                                                                                           | Annals of Transplantati on                                      | 2012 | Livers |    | 886 | 2003/1  | 2012/9  | No  |                                                                                                                                                                                                                                                                         | No  |                                                                                                                                                                                                                                                                                                        | 0 |
| 356 | Yang J, Zhu L, Zhang Y, et al. PPK analysis of tacrolimus early after Chinese pediatric and adult liver transplantation with different CYP3A5 genotypes. <i>Latin American Journal of Pharmacy</i> 2017;36(2):238-46 Online First.                                                              | Latin American Journal of Pharmacy                              | 2017 | Livers |    | 46  | 2011    | 2013    | Yes | Approval was obtained from the Hospital's Ethics Committee for the study. Informed written consent was assigned by the patients or their caregivers for blood sampling.                                                                                                 | No  |                                                                                                                                                                                                                                                                                                        | 0 |
| 357 | Yang JW, Liao SS, Zhu LQ, et al. Population pharmacokinetic analysis of tacrolimus early after Chinese pediatric liver transplantation. <i>Int J Clin Pharmacol Ther</i> 2015;53(1):75-83 doi: 10.5414/CP202189published Online First.                                                          | International Journal of Clinical Pharmacology and Therapeutics | 2015 | Livers |    | 52  | 2011    | 2012    | Yes | Approval for the study was obtained from the hospital's ethics committee                                                                                                                                                                                                | No  |                                                                                                                                                                                                                                                                                                        | 0 |
| 358 | Yang X, Lu Q, Tang T, et al. Prediction of the prognosis after liver transplantation in severe hepatitis B-induced liver failure and clinical decision for liver transplantation. <i>J Surg Res</i> 2013;183(2):846-51 doi: 10.1016/j.jss.2013.01.034published Online First.                    | Journal of Surgical Research                                    | 2013 | Livers | DD | 74  | 1999/1  | 2010/12 | Yes | The study protocol was conducted in accordance with the standards of the Declaration of Helsinki and current ethical guidelines.                                                                                                                                        | Yes | None of the donors included in our study were prisoners who died as a result of execution. The Ethics Committee of the Southwest Hospital reviewed their written applications and supporting documents to make sure that they were well informed and make the decision by their own before permission. | 0 |
| 359 | Yang YJ, Chen DZ, Li LX, et al. Sirolimus-based immunosuppressive therapy in liver transplant recipient with tacrolimus-related chronic renal insufficiency. <i>Transplant Proc</i> 2008;40(5):1541-44 doi: 10.1016/j.transproceed.2008.01.081published Online First.                           | Transplantati on Proceedings                                    | 2008 | Livers |    | 16  | 2004/1  | 2005/1  | No  |                                                                                                                                                                                                                                                                         | No  |                                                                                                                                                                                                                                                                                                        | 0 |
| 360 | Yang YL, Shi LJ, Lin MJ, et al. Clinical analysis and significance of cholangiography for biliary cast/stone after orthotopic liver transplantation. <i>Journal of Nanoscience and Nanotechnology</i> 2013;13(1):171-77 doi: 10.1166/jnn.2013.6790published Online First.                       | Journal of Nanoscience and Nanotechnology                       | 2013 | Livers |    | 14  | 2001/11 | 2005/10 | No  |                                                                                                                                                                                                                                                                         | No  |                                                                                                                                                                                                                                                                                                        | 0 |
| 361 | Yang Z, Zhou L, Wu LM, et al. Combination of polymorphisms within the HDAC1 and HDAC3 gene predict tumor recurrence in hepatocellular carcinoma patients that have undergone transplant therapy. <i>Clin Chem Lab Med</i> 2010;48(12):1785-91 doi: 10.1515/CCLM.2010.353published Online First. | Clinical Chemistry and Laboratory Medicine                      | 2010 | Livers |    | 97  | 2003    | 2006    | Yes | This study protocol was approved by the Ethical Review Committee of the First Affiliated Hospital, School of Medicine, Zhejiang University, and informed consent was obtained according to the Declaration of Helsinki                                                  | No  |                                                                                                                                                                                                                                                                                                        | 0 |
| 362 | Yang Z, Zhou L, Wu LM, et al. Overexpression of long non-coding RNA HOTAIR predicts tumor recurrence in hepatocellular carcinoma patients following liver transplantation. <i>Ann Surg Oncol</i> 2011;18(5):1243-50 doi: 10.1245/s10434-011-1581-ypublished Online First.                       | Annals of Surgical Oncology                                     | 2011 | Livers |    | 60  | 2003    | 2005    | Yes | This study was approved by the local ethics committee, and informed consents were obtained from all of the patients                                                                                                                                                     | No  |                                                                                                                                                                                                                                                                                                        | 0 |

|     | A                                                                                                                                                                                                                                                                               | B                                         | C    | D      | E  | F   | G      | H       | I   | J                                                                                                                                                                                                                                                                                                      | K   | L                                                                       | M   |
|-----|---------------------------------------------------------------------------------------------------------------------------------------------------------------------------------------------------------------------------------------------------------------------------------|-------------------------------------------|------|--------|----|-----|--------|---------|-----|--------------------------------------------------------------------------------------------------------------------------------------------------------------------------------------------------------------------------------------------------------------------------------------------------------|-----|-------------------------------------------------------------------------|-----|
| 363 | Yao J, Feng XW, Yu XB, et al. Recipient IL-6-572c/G genotype is associated with reduced incidence of acute rejection following liver transplantation. J Int Med Res 2013;41(2):356-64 doi: 10.1177/0300060513477264published Online First.                                      | Journal of International Medical Research | 2013 | Livers |    | 335 | 2005/1 | 2010/12 | Yes | This study was approved by the Ethical Review Committee of the First Affiliated Hospital, School of Medicine, Zhejiang University, Hangzhou, China; written informed consent was obtained from all patients.                                                                                           | No  |                                                                         | 0   |
| 364 | Ye D, Li H, Wang Y, et al. Circulating Fibroblast Growth Factor 21 Is A Sensitive Biomarker for Severe Ischemia/reperfusion Injury in Patients with Liver Transplantation. Sci Rep 2016;6:19776 Online First.                                                                   | Scientific Reports                        | 2016 | Livers |    | 13  | 0      | 0       | Yes | Written consents were obtained from all subjects. Both studies were carried out in accordance with the guidelines approved by human ethics committees in The University of Hong Kong and Fudan University, respectively.                                                                               | No  |                                                                         | 0   |
| 365 | Yi H, An Y, Lv H, et al. The association of lipopolysaccharide and inflammatory factors with hepatopulmonary syndrome and their changes after orthotopic liver transplantation. J Thorac Dis 2014;6(10):1469-75 doi: 10.3978/j.issn.2072-1439.2014.10.05published Online First. | Journal of Thoracic Disease               | 2014 | Livers |    | 26  | 2004/3 | 2006/1  | Yes | The study protocol was approved by the institution's Human Research Committee and the Medical Ethics Committee of The Third Affiliated Hospital of Sun Yat-sen University                                                                                                                              | No  |                                                                         | 0   |
| 366 | Yu D, Liu J, Chen J, et al. GGPP51 predicts the biological character of hepatocellular carcinoma in patients with cirrhosis. BMC Cancer 2014;14 (1) Online First.                                                                                                               | BMC Cancer                                | 2014 | Livers |    | 10  | 2005/1 | 2012/8  | Yes | This study was approved by the Scientific Research Ethics Committee of the affiliated Drum Tower Hospital, Medical School of Nanjing University, and an informed consent was obtained from all participants.                                                                                           | No  |                                                                         | 0   |
| 367 | Yu S, Gao F, Yu J, et al. De novo cancers following liver transplantation: A single center experience in China. PLoS One 2014;9 (1) Online First.                                                                                                                               | PLoS ONE                                  | 2014 | Livers |    | 17  | 2005/1 | 2011/12 | Yes | Ethical approval was obtained from the Committee of Ethics in Biomedical Research of Zhejiang University and conformed to the ethical guidelines of the 1975 Declaration of Helsinki. Written informed consent was obtained from all participants.                                                     | No  |                                                                         | 0   |
| 368 | Yu S, He X, Yang L, et al. A retrospective study of conversion from tacrolimus-based to sirolimus-based immunosuppression in orthotopic liver transplant recipients. Exp Clin Transplant 2008;6(2):113-17 Online First.                                                         | Experimental and Clinical Transplantation | 2008 | Livers |    | 44  | 2004/1 | 2007/1  | No  |                                                                                                                                                                                                                                                                                                        | No  |                                                                         | 0   |
| 369 | Yu S, Wu L, Jin J, et al. Influence of CYP3A5 gene polymorphisms of donor rather than recipient to tacrolimus individual dose requirement in liver transplantation. Transplantation 2006;81(1):46-51 doi: 10.1097/01.tp.0000188118.34633.bfpublished Online First.              | Transplantation                           | 2006 | Livers | DD | 53  | 2004/7 | 2005/3  | No  |                                                                                                                                                                                                                                                                                                        | No  |                                                                         | 0   |
| 370 | Yu S, Yu J, Zhang W, et al. Safe use of liver grafts from hepatitis B surface antigen positive donors in liver transplantation. J Hepatol 2014;61(4):809-15 Online First.                                                                                                       | Journal of Hepatology                     | 2014 | Livers | DD | 369 | 2010/1 | 2013/2  | Yes | Ethical approval of each transplant was obtained from the Committee of Ethics in Biomedical Research of Zhejiang University, and in accordance with the ethical guidelines of the 1975 Declaration of Helsinki                                                                                         | Yes | We declared that no donor organs were obtained from executed prisoners. | DCD |
| 371 | Yu X, Liu Z, Wang Y, et al. Characteristics of gammadelta1 and gammadelta 2 T cell subsets in acute liver allograft rejection. Transl Immunol 2013;29(1-4):118-22 Online First.                                                                                                 | Transplant Immunology                     | 2013 | Livers | DD | 63  | 0      | 0       | Yes | The study protocol was approved by the institutional review board. All patients gave written informed consent to participate in this study.                                                                                                                                                            | No  |                                                                         | 0   |
| 372 | Yu X, Wei B, Dai Y, et al. Genetic polymorphism of Interferon Regulatory Factor 5 (IRF5) correlates with allograft acute rejection of liver transplantation. PLoS One 2014;9(4) doi: 10.1371/journal.pone.0094426published Online First.                                        | PLoS ONE                                  | 2014 | Livers |    | 289 | 2006   | 2011    | Yes | The research procedure was approved and supervised by the Ethical Review Committee of the First Affiliated Hospital, School of Medicine, Zhejiang University, and we followed the World Medical Association's Declaration of Helsinki                                                                  | No  |                                                                         | 0   |
| 373 | Yu X, Xie H, Wei B, et al. Association of MDR1 gene SNPs and haplotypes with the tacrolimus dose requirements in Han Chinese liver transplant recipients. PLoS One 2011;6(11) doi: 10.1371/journal.pone.0025933published Online First.                                          | PLoS ONE                                  | 2011 | Livers |    | 64  | 0      | 0       | Yes | The research protocol was approved by the Institutional Review Board, Key Lab of Combined Multi-organ Transplantation, Ministry of Public Health. Informed written consent was obtained according to the Declaration of Helsinki.                                                                      | No  |                                                                         | 0   |
| 374 | Yu Z, Sun Z, Yu S, et al. Safety limitations of fatty liver transplantation can be extended to 40%: Experience of a single centre in China. Liver International 2016 Online First.                                                                                              | Liver International.                      | 2016 | Livers | DD | 563 | 2010/4 | 2014/10 | Yes | Written informed consents were obtained from all participants. Ethical approval of each transplant was obtained from the Ethics Committee of the First Affiliated Hospital, School of Medicine, Zhejiang University, and in accordance with the ethical guidelines of the 1975 Declaration of Helsinki | Yes | no allografts obtained from executed prisoners were used                | DCD |
| 375 | Yuan D, Wei YG, Lin HM, et al. Risk factors of biliary complications following liver transplantation: Retrospective analysis of a single centre. Postgrad Med J 2009;85(1001):119-23 doi: 10.1136/pgmj.2008.075176published Online First.                                       | Postgraduate Medical Journal              | 2009 | Livers | DD | 263 | 1999/1 | 2005/11 | Yes | All the liver transplantations were approved by the ethical committee of the West China Hospital.                                                                                                                                                                                                      | No  |                                                                         | 0   |

|     | A                                                                                                                                                                                                                                                                                                         | B                                                            | C    | D      | E  | F    | G       | H       | I   | J                                                                                                                                                                                                                                                                                                                                                                                                                                                       | K   | L                                                                                                                                                     | M         |
|-----|-----------------------------------------------------------------------------------------------------------------------------------------------------------------------------------------------------------------------------------------------------------------------------------------------------------|--------------------------------------------------------------|------|--------|----|------|---------|---------|-----|---------------------------------------------------------------------------------------------------------------------------------------------------------------------------------------------------------------------------------------------------------------------------------------------------------------------------------------------------------------------------------------------------------------------------------------------------------|-----|-------------------------------------------------------------------------------------------------------------------------------------------------------|-----------|
| 376 | Yuan X, Chen C, Zhou J, et al. Organ donation and transplantation from donors with systemic infection: a single-center experience. <i>Transplant Proc</i> 2016;48(7):2454-57 Online First.                                                                                                                | Transplantation Proceedings                                  | 2016 | Livers | DD | 30   | 2013/1  | 2014/12 | No  |                                                                                                                                                                                                                                                                                                                                                                                                                                                         | Yes | All donors were in hospital's ICU before death. The article has a table stipulating cause of death for each, implying that donors were not prisoners. | DBD + DCD |
| 377 | Yuefeng M, Weili F, Wenxiang T, et al. Long-term outcome of patients with lamivudine after early cessation of hepatitis B immunoglobulin for prevention of recurrent hepatitis B following liver transplantation. <i>Clin Transplant</i> 2011;25(4):517-22 Online First.                                  | Clinical Transplantation                                     | 2011 | Livers |    | 17   | 2001/7  | 2005/5  | No  |                                                                                                                                                                                                                                                                                                                                                                                                                                                         | Yes | Before the operation, all donors or their relatives had signed consent forms in agreement to organ donation                                           | 0         |
| 378 | Zeng Z, Jiang Z, Wang CS, et al. Preoperative evaluation improves the outcome in heart transplant recipients with pulmonary hypertension: retrospective analysis of 106 cases. <i>Transplant Proc</i> 2010;42(9):3708-10 doi: 10.1016/j.transproceed.2010.08.067 published Online First.                  | Transplantation Proceedings                                  | 2010 | Hearts | DD | 106  | 2004/1  | 2006/3  | No  |                                                                                                                                                                                                                                                                                                                                                                                                                                                         | No  |                                                                                                                                                       | 0         |
| 379 | Zhai H, Liang P, Yu XL, et al. Microwave ablation in treating intrahepatic recurrence of hepatocellular carcinoma after liver transplantation: An analysis of 11 cases. <i>Int J Hyperthermia</i> 2015;31(8):863-68 doi: 10.3109/02656736.2015.1091953 published Online First.                            | International Journal of Hyperthermia                        | 2015 | Livers |    | 11   | 2008/10 | 2014/8  | No  |                                                                                                                                                                                                                                                                                                                                                                                                                                                         | No  |                                                                                                                                                       | 0         |
| 380 | Zhang A, Zhang M, Shen Y, et al. Hepatitis B virus reactivation is a risk factor for development of post-transplant lymphoproliferative disease after liver transplantation. <i>Clin Transplant</i> 2009;23(5):756-60 doi: 10.1111/j.1399-0012.2009.01049.x published Online First.                       | Clinical Transplantation                                     | 2009 | Livers |    | 144  | 2002/1  | 2005/12 | No  |                                                                                                                                                                                                                                                                                                                                                                                                                                                         | No  |                                                                                                                                                       | 0         |
| 381 | Zhang C, Rao J, Tu Z, et al. Surgical resection of resectable thoracic metastatic hepatocellular carcinoma after liver transplantation. <i>J Thorac Cardiovasc Surg</i> 2009;138(1):240-41 doi: 10.1016/j.jtcvs.2008.05.014 published Online First.                                                       | Journal of Thoracic and Cardiovascular Surgery               | 2009 | Livers |    | 5    | 2003/10 | 2007/9  | No  | The study was retrospective and approved by all 5 patients                                                                                                                                                                                                                                                                                                                                                                                              | No  |                                                                                                                                                       | 0         |
| 382 | Zhang D, Jiao Z, Han J, et al. Clinicopathological features of hepatitis B virus recurrence after liver transplantation: Eleven-year experience. <i>Int J Clin Exp Pathol</i> 2014;7(7):4057-66 Online First.                                                                                             | International Journal of Clinical and Experimental Pathology | 2014 | Livers |    | 184  | 1999    | 2010    | Yes | This study was approved by the Ethics Committee of West China Hospital of Sichuan University, and informed consents were obtained from all patients prior to study entry.                                                                                                                                                                                                                                                                               | Yes | Grafts were all from voluntary donors who were negative for both HBsAg and HBV-DNA in serum                                                           | 0         |
| 383 | Zhang F, Wu LM, Zhou L, et al. Predictive value of expression and promoter hypermethylation of XAF1 in hepatitis B virus-associated hepatocellular carcinoma treated with transplantation. <i>Ann Surg Oncol</i> 2008;15(12):3494-502 doi: 10.1245/s10434-008-0146-1 published Online First.              | Annals of Surgical Oncology                                  | 2008 | Livers |    | 65   | 2003    | 2005    | Yes | This study was approved by the local ethics committee, and informed consent was obtained according to the Declaration of Helsinki.                                                                                                                                                                                                                                                                                                                      | No  |                                                                                                                                                       | 0         |
| 384 | Zhang FJ, Li CX, Liang Z, et al. Short- to mid-term evaluation of CT-guided 125I brachytherapy on intra-hepatic recurrent tumors and/or extra-hepatic metastases after liver transplantation for hepatocellular carcinoma. <i>Cancer Biology and Therapy</i> 2009;8(7):585-90 Online First.               | Cancer Biology and Therapy                                   | 2009 | Livers |    | 10   | 2004/11 | 2008/5  | Yes | All procedures performed in this study were approved by the Committee of Ethics of Sun Yat-sen University Cancer Center and the informed written consent was obtained from all patients for CT-guided 125I brachytherapy                                                                                                                                                                                                                                | No  |                                                                                                                                                       | 0         |
| 385 | Zhang G, Cheng Y, Shen W, et al. The short-term effect of liver transplantation on the low-frequency fluctuation of brain activity in cirrhotic patients with and without overt hepatic encephalopathy. <i>Brain Imaging and Behavior</i> 2016;1-13 Online First.                                         | Brain Imaging and Behavior                                   | 2016 | Livers |    | 30   | 0       | 0       | Yes | This study was approved by the Medical Research Ethics Committee of Tianjin First Central Hospital. All procedures followed were in accordance with the ethical standards of the responsible committee on human experimentation (institutional and national) and with the Helsinki Declaration of 1975, and the applicable revisions at the time of the investigation. Informed consent was obtained from all subjects for being included in the study. | No  |                                                                                                                                                       | 0         |
| 386 | Zhang H, Chen L, Gu G, et al. Clinical observation and nursing care on the prevention of abdominal organ cluster transplantation rejection. <i>J Clin Nurs</i> 2013;22(11-12):1599-603 doi: 10.1111/jocn.12079 published Online First.                                                                    | Journal of Clinical Nursing                                  | 2013 | Livers |    | 8    | 2004/5  | 2009/3  | No  |                                                                                                                                                                                                                                                                                                                                                                                                                                                         | No  |                                                                                                                                                       | 0         |
| 387 | Zhang H, Shi Y, Wu H, et al. Change of hepatic arterial systolic/diastolic ratio predicts ischemic type biliary lesion after orthotopic liver transplantation. <i>Clin Imaging</i> 2016;40(3):419-24 Online First.                                                                                        | Clinical Imaging                                             | 2016 | Livers | DD | 128  | 2013/9  | 2014/8  | No  |                                                                                                                                                                                                                                                                                                                                                                                                                                                         | No  |                                                                                                                                                       | DCD       |
| 388 | Zhang HM, Jiang WT, Pan C, et al. Milan criteria, University of California, San Francisco, criteria, and model for end-stage liver disease score as predictors of salvage liver transplantation. <i>Transplant Proc</i> 2015;47(2):438-44 doi: 10.1016/j.transproceed.2014.10.046 published Online First. | Transplantation Proceedings                                  | 2015 | Livers | DD | 1554 | 2000/1  | 2011/12 | No  |                                                                                                                                                                                                                                                                                                                                                                                                                                                         | No  |                                                                                                                                                       | 0         |

|     | A                                                                                                                                                                                                                                                                                                                                             | B                                          | C    | D      | E  | F   | G       | H       | I   | J                                                                                                                                                                                                                                                                                                                                                                                                                                                                                                                         | K   | L                                                                                                                                                                                                                                                                                                           | M         |
|-----|-----------------------------------------------------------------------------------------------------------------------------------------------------------------------------------------------------------------------------------------------------------------------------------------------------------------------------------------------|--------------------------------------------|------|--------|----|-----|---------|---------|-----|---------------------------------------------------------------------------------------------------------------------------------------------------------------------------------------------------------------------------------------------------------------------------------------------------------------------------------------------------------------------------------------------------------------------------------------------------------------------------------------------------------------------------|-----|-------------------------------------------------------------------------------------------------------------------------------------------------------------------------------------------------------------------------------------------------------------------------------------------------------------|-----------|
| 389 | Zhang HM, Li SP, Yu Y, et al. Bi-directional roles of IRF-1 on autophagy diminish its prognostic value as compared with Ki67 in liver transplantation for hepatocellular carcinoma. <i>Oncotarget</i> 2016;7(25):37979-92 doi: 10.18632/oncotarget.9365 published Online First.                                                               | Oncotarget                                 | 2016 | Livers |    | 127 | 2011/7  | 2014/7  | Yes | The study was approved by the Tianjin First Central Hospital Research Ethics Committee. Tumor specimens used in our analysis were from the tissue bank of Tianjin First Central Hospital. Informed consent was obtained from each patient before specimen removal and storage in the tissue bank. Base line data on the patients and their tumors were recorded.                                                                                                                                                          | No  |                                                                                                                                                                                                                                                                                                             | 0         |
| 390 | Zhang LJ, Yang GF, Jiang B, et al. Cavernous transformation of portal vein: 16-Slice CT portography and correlation with surgical procedure of orthotopic liver transplantation. <i>Abdom Imaging</i> 2008;33(5):529-35 doi: 10.1007/s00261-007-9343-9 published Online First.                                                                | Abdominal Imaging                          | 2008 | Livers |    | 14  | 2003/1  | 2005/2  | No  |                                                                                                                                                                                                                                                                                                                                                                                                                                                                                                                           | No  |                                                                                                                                                                                                                                                                                                             | 0         |
| 391 | Zhang M, Yin F, Chen B, et al. Mortality risk after liver transplantation in hepatocellular carcinoma recipients: A nonlinear predictive model. <i>Surgery (United States)</i> 2012;151(6):889-97 doi: 10.1016/j.surg.2011.12.034 published Online First.                                                                                     | Surgery (United States)                    | 2012 | Livers | DD | 290 | 1999/2  | 2009/8  | Yes | Each liver donation and transplantation in our center was approved by the Medical Ethics Committee of West China Hospital, Sichuan University, and the study protocol was carried out in accordance with the Declaration of Helsinki.                                                                                                                                                                                                                                                                                     | Yes | All organ donations in the electronic records were contributed voluntarily. All of the donors or their families had provided written, valid, in-formed consent for donation before the organs were procured.                                                                                                | MX        |
| 392 | Zhang M, Yin F, Chen B, et al. Pretransplant prediction of posttransplant survival for liver recipients with benign end-stage liver diseases: A nonlinear model. <i>PLoS One</i> 2012;7(3) Online First.                                                                                                                                      | PLoS ONE                                   | 2012 | Livers | DD | 360 | 1999/2  | 2009/8  | Yes | Each liver donation and transplantation in our center was approved by the Medical Ethics Committee of West China Hospital, Sichuan University, and the study protocol was carried out in accordance with the Declaration of Helsinki.                                                                                                                                                                                                                                                                                     | Yes | All organ donations recorded in the electronic database were contributed voluntarily, and no grafts were obtained from executed prisoners or other institutionalized persons. All of the donors or their families had provided written, valid informed consent for donation before the organs were procured | DBD + DCD |
| 393 | Zhang M, Zhong X, Zhang W, et al. Human parvovirus B19 infection induced pure red cell aplasia in liver transplant recipients. <i>Int J Clin Pract</i> 2015;69(S183):29-34 doi: 10.1111/ijcp.12664 published Online First.                                                                                                                    | International Journal of Clinical Practice | 2015 | Livers | DD | 13  | 2011/11 | 2014/5  | Yes | We obtained ethical approval from the Committee of Ethics in Biomedical Research of Zhejiang University. The livers for transplantation were all obtained from donors after cardiac death. Informed consent was obtained from each recipient included in the study. The study protocol conformed to the ethical guidelines of the 1975 Declaration of Helsinki as reflected in a priori approval by the institution's human research committee. The research design was hospital-based and all cases were well evaluated. | No  | The livers for transplantation were all obtained from donors after cardiac death. Informed                                                                                                                                                                                                                  | DCD       |
| 394 | Zhang ML, Xu J, Zhang W, et al. Microbial epidemiology and risk factors of infections in recipients after DCD liver transplantation. <i>Int J Clin Pract</i> 2016;70:17-21 doi: 10.1111/ijcp.12812 published Online First.                                                                                                                    | International Journal of Clinical Practice | 2016 | Livers | DD | 198 | 2010/1  | 2014/12 | No  |                                                                                                                                                                                                                                                                                                                                                                                                                                                                                                                           | No  |                                                                                                                                                                                                                                                                                                             | DCD       |
| 395 | Zhang P, Guo Z, Zhong K, et al. Evaluation of Immune Profiles and MicroRNA Expression Profiles in Peripheral Blood Mononuclear Cells of Long-Term Stable Liver Transplant Recipients and Recipients with Acute Rejection Episodes. <i>Transplant Proc</i> 2015;47(10):2907-15 doi: 10.1016/j.transproceed.2015.10.048 published Online First. | Transplantation Proceedings                | 2015 | Livers |    | 68  | 0       | 0       | Yes | This study was conducted in accordance with the 1975 Helsinki Declaration, and the study protocol was approved by the Institutional Ethic Committee of our hospital and the Medical Ethical Committee of the First Affiliated Hospital of Sun Yat-Sen University before the commencement of the study. A written informed consent was obtained from each patient before enrolling them in this study.                                                                                                                     | No  |                                                                                                                                                                                                                                                                                                             | 0         |
| 396 | Zhang Q, Chen H, Li Q, et al. Combination adjuvant chemotherapy with oxaliplatin, 5-fluorouracil and leucovorin after liver transplantation for hepatocellular carcinoma: A preliminary open-label study. <i>Invest New Drugs</i> 2011;29(6):1360-69 doi: 10.1007/s10637-011-9726-1 published Online First.                                   | Investigation New Drugs                    | 2011 | Livers |    | 95  | 2005/2  | 2006/12 | Yes | The protocol was approved by the China Medical Ethics Committee (Clinical Trials number: ChiCTR-TRC-10000961), and informed consent was obtained from each patient. This study was performed in compliance with principles of good clinical practice, the Helsinki Declaration, and institutional guidelines.                                                                                                                                                                                                             | No  |                                                                                                                                                                                                                                                                                                             | 0         |
| 397 | Zhang Q, Chen X, Zang Y, et al. The survival benefit of liver transplantation for hepatocellular carcinoma patients with hepatitis b virus infection and cirrhosis. <i>PLoS One</i> 2012;7(12) doi: 10.1371/journal.pone.0050919 published Online First.                                                                                      | PLoS ONE                                   | 2012 | Livers |    | 313 | 2002    | 2008    | Yes | This retrospective study was performed in compliance with principles of the Helsinki Declaration, and institutional guidelines.                                                                                                                                                                                                                                                                                                                                                                                           | No  |                                                                                                                                                                                                                                                                                                             | 0         |

|     | A                                                                                                                                                                                                                                                                                                                                         | B                                                   | C    | D      | E  | F | G   | H       | I       | J   | K                                                                                                                                                                                                                                                                                                                                                                                                                    | L   | M                                                                                                                               |   |
|-----|-------------------------------------------------------------------------------------------------------------------------------------------------------------------------------------------------------------------------------------------------------------------------------------------------------------------------------------------|-----------------------------------------------------|------|--------|----|---|-----|---------|---------|-----|----------------------------------------------------------------------------------------------------------------------------------------------------------------------------------------------------------------------------------------------------------------------------------------------------------------------------------------------------------------------------------------------------------------------|-----|---------------------------------------------------------------------------------------------------------------------------------|---|
| 398 | Zhang Q, Chen X, Zhou J, et al. CD147, MMP-2, MMP-9 and MVD-CD34 are significant predictors of recurrence after liver transplantation in hepatocellular carcinoma patients. <i>Cancer Biol Ther</i> 2006;5(7):808-14 Online First.                                                                                                        | Cancer Biology & Therapy                            | 2006 | Livers |    |   | 82  | 2002/1  | 2003/12 | No  |                                                                                                                                                                                                                                                                                                                                                                                                                      |     | 0                                                                                                                               |   |
| 399 | Zhang Q, Shang L, Zang Y, et al. ?-Fetoprotein is a potential survival predictor in hepatocellular carcinoma patients with hepatitis B selected for liver transplantation. <i>Eur J Gastroenterol Hepatol</i> 2014;26(5):544-52 doi: 10.1097/MEG.000000000000029 published Online First.                                                  | European Journal of Gastroenterology and Hepatology | 2014 | Livers |    |   | 203 | 2002/7  | 2006/12 | Yes | This study was carried out in compliance with the principles of the Declaration of Helsinki and the protocol was approved by the Ethics Committee of the General Hospital of the Chinese People's Armed Police Force (China).                                                                                                                                                                                        | No  | 0                                                                                                                               |   |
| 400 | Zhang W, Zhong H, Zhuang L, et al. Peripheral blood CD4+ cell ATP activity measurement to predict HCC recurrence post-DCD liver transplant. <i>Int J Clin Pract</i> 2016;70:11-16 doi: 10.1111/ijcp.12811 published Online First.                                                                                                         | International Journal of Clinical Practice          | 2016 | Livers | DD |   | 76  | 2011/1  | 2013/12 | Yes | This study was approved by the appropriate ethics committees. Written informed consent was obtained from all of the patients before enrolment.                                                                                                                                                                                                                                                                       | No  | 0                                                                                                                               |   |
| 401 | Zhang X, Fan J, Yang MF, et al. Monitoring of human cytomegalovirus infection in bone marrow and liver transplant recipients by antigenaemia assay and enzyme-linked immunosorbent assay. <i>J Int Med Res</i> 2009;37(1):31-36 Online First.                                                                                             | Journal of International Medical Research           | 2009 | Livers |    |   | 51  | 2005/11 | 2007/9  | No  |                                                                                                                                                                                                                                                                                                                                                                                                                      | No  | 0                                                                                                                               |   |
| 402 | Zhang X, Wang Z, Fan J, et al. Impact of interleukin-10 gene polymorphisms on tacrolimus dosing requirements in Chinese liver transplant patients during the early posttransplantation period. <i>Eur J Clin Pharmacol</i> 2011;67(8):803-13 doi: 10.1007/s00228-011-0993-8 published Online First.                                       | European Journal of Clinical Pharmacology           | 2011 | Livers |    |   | 53  | 2006/5  | 2010/3  | Yes | This study was conducted in accordance with the Declaration of Helsinki and its amendments and was approved by the Ethics Committee of Shanghai Jiaotong University. All subjects gave their written informed consent. <i>Eur J Clin Pharmacol</i> (2011) 67:803-813                                                                                                                                                 | No  | 0                                                                                                                               |   |
| 403 | Zhang X, Xu J, Fan J, et al. Influence of IL-18 and IL-10 Polymorphisms on tacrolimus elimination in Chinese lung transplant patients. <i>Dis Markers</i> 2017;2017 doi: 10.1155/2017/7834035 published Online First.                                                                                                                     | Disease Markers                                     | 2017 | Lungs  | DD |   | 51  | 2005/7  | 2015/7  | Yes | The study was approved by the Ethics Committee of Shanghai Pulmonary Hospital and Shanghai First People's Hospital. Written informed consent was obtained from all patients in accordance with the Declaration of Helsinki and its amendments.                                                                                                                                                                       | No  | 0                                                                                                                               |   |
| 404 | Zhang XD, Cheng Y, Poon CS, et al. Long- and short-range functional connectivity density alteration in non-alcoholic cirrhotic patients one month after liver transplantation: A resting-state fMRI study. <i>Brain Res</i> 2015;1620:177-87 doi: 10.1016/j.brainres.2015.04.046 published Online First.                                  | Brain Research                                      | 2015 | Livers |    |   | 13  | 2013/12 | 2014/9  | Yes | This prospective study was approved by the Medical Research Ethics Committee of Tianjin First Central Hospital, Tianjin, China, and written informed consents were obtained from all patients.                                                                                                                                                                                                                       | No  | 0                                                                                                                               |   |
| 405 | Zhang XF, Lv Y, Xue WJ, et al. Mycobacterium tuberculosis infection in Solid Organ Transplant Recipients: Experience From a Single Center in China. <i>Transplant Proc</i> 2008;40(5):1382-85 doi: 10.1016/j.transproceed.2008.01.075 published Online First.                                                                             | Transplantation Proceedings                         | 2008 | Livers |    |   | 85  | 2000    | 2006/4  | No  |                                                                                                                                                                                                                                                                                                                                                                                                                      | No  | 0                                                                                                                               |   |
| 406 | Zhang XQ, Wang ZW, Fan JW, et al. The impact of sulfonylureas on tacrolimus apparent clearance revealed by a population pharmacokinetics analysis in Chinese adult liver-transplant patients. <i>Ther Drug Monit</i> 2012;34(2):126-33 doi: 10.1097/FTD.0b013e31824a67eb published Online First.                                          | Therapeutic Drug Monitoring                         | 2012 | Livers |    |   | 262 | 2002/3  | 2009/7  | Yes | This study was conducted in accordance with the Declaration of Helsinki and its amendments, and was approved by the Ethics Committee of Shanghai Jiao Tong University. All the participants provided written informed consent.                                                                                                                                                                                       | No  | 0                                                                                                                               |   |
| 407 | Zhang XX, Bian RJ, Wang J, et al. Relationship between cytokine gene polymorphisms and acute rejection following liver transplantation. <i>Genetics and Molecular Research</i> 2016;15(2) Online First.                                                                                                                                   | Genetics and Molecular Research                     | 2016 | Livers |    |   | 359 | 2013    | 2015    | Yes | All participants provided written informed consent and the study was approved by the Ethics Committee of our hospital.                                                                                                                                                                                                                                                                                               | No  | 0                                                                                                                               |   |
| 408 | Zhang Y, Wang YL, Liu YW, et al. Change of peripheral blood mononuclear cells IFN- $\gamma$ , IL-10, and TGF- $\beta$ 1 mRNA expression levels with active human cytomegalovirus infection in orthotopic liver transplantation. <i>Transplant Proc</i> 2009;41(5):1767-69 doi: 10.1016/j.transproceed.2009.03.064 published Online First. | Transplantation Proceedings                         | 2009 | Livers | DD |   | 20  | 2003    | 2004    | Yes | The present study was approved by the institutional ethics committee of our institute. Informed consent was obtained from each patient. All recipients received livers from cadaveric donors. The procedure met all applicable institutional guidelines of the Tianjin First Central Hospital, Tianjin Medical University, China, and Chinese governmental regulations concerning the ethical use of donated organs. | No  | 0                                                                                                                               |   |
| 409 | Zhang Y, Yan L, Wen T, et al. Prophylaxis against hepatitis B virus recurrence after liver transplantation for hepatitis B virus-related end-stage liver diseases with severe hypersplenism and splenomegaly: Role of splenectomy. <i>J Surg Res</i> 2012;178(1):478-86 doi: 10.1016/j.jss.2012.02.047 published Online First.            | Journal of Surgical Research                        | 2012 | Livers |    |   | 510 | 1999/6  | 2009/10 | Yes | These were approved by the Ethics Committee of West China Hospital and in accordance with the ethical guidelines of the Declaration of Helsinki.                                                                                                                                                                                                                                                                     | Yes | All liver grafts were from the donors with brain dead or living, and all donations were voluntary and altruistic in this study. | 0 |

|     | A                                                                                                                                                                                                                                                                                                        | B                                                      | C    | D      | E  | F   | G       | H       | I   | J                                                                                                                                                                                                                                                                                                                                                                                                                                                                                                                                                  | K   | L                                                               | M |
|-----|----------------------------------------------------------------------------------------------------------------------------------------------------------------------------------------------------------------------------------------------------------------------------------------------------------|--------------------------------------------------------|------|--------|----|-----|---------|---------|-----|----------------------------------------------------------------------------------------------------------------------------------------------------------------------------------------------------------------------------------------------------------------------------------------------------------------------------------------------------------------------------------------------------------------------------------------------------------------------------------------------------------------------------------------------------|-----|-----------------------------------------------------------------|---|
| 410 | Zhang YC, Liu W, Fu BS, et al. Therapeutic potentials of umbilical cord-derived mesenchymal stromal cells for ischemic-type biliary lesions following liver transplantation. <i>Cytotherapy</i> 2017;19(2):194-99 Online First.                                                                          | Cytotherapy                                            | 2017 | Livers |    | 12  | 2013/1  | 2014/6  | Yes | The study protocol conformed to the ethical guidelines of the 1975 Declaration of Helsinki. This study was the previous work of a clinical trial, which was approved by the Ethics Committee of the Third Affiliated Hospital of Sun Yat-Sen University                                                                                                                                                                                                                                                                                            | No  |                                                                 | 0 |
| 411 | Zhang YC, Qu EZ, Ren J, et al. New diagnosis and therapy model for ischemic-type biliary lesions following liver transplantation-a retrospective cohort study. <i>PLoS One</i> 2014;9(9) doi: 10.1371/journal.pone.0105795published Online First.                                                        | PLoS ONE                                               | 2014 | Livers |    | 594 | 2003/10 | 2012/6  | Yes | All the patients in the EDIM group gave written informed consent. The study was approved by the Ethics Committee of the Third Affiliated Hospital of Sun Yat-Sen University, and followed the STROBE guidelines for reporting of observational studies.                                                                                                                                                                                                                                                                                            | No  |                                                                 | 0 |
| 412 | Zheng RQ, Mao R, Ren J, et al. Contrast-enhanced ultrasound for the evaluation of hepatic artery stenosis after liver transplantation: Potential role in changing the clinical algorithm. <i>Liver Transpl</i> 2010;16(6):729-35 doi: 10.1002/lt.22054published Online First.                            | Liver Transplantation                                  | 2010 | Livers |    | 47  | 2005/3  | 2008/12 | Yes | Written, informed consent was obtained from all recipients. The study was approved by the institutional ethics review board and was in compliance with the Declaration of Helsinki.                                                                                                                                                                                                                                                                                                                                                                | No  |                                                                 | 0 |
| 413 | Zheng S, Chen Y, Liang T, et al. Prevention of hepatitis B recurrence after liver transplantation using lamivudine or lamivudine combined with hepatitis B immunoglobulin prophylaxis. <i>Liver Transpl</i> 2006;12(2):253-58 doi: 10.1002/lt.20701published Online First.                               | Liver Transplantation                                  | 2006 | Livers |    | 165 | 1999/12 | 2004/6  | No  |                                                                                                                                                                                                                                                                                                                                                                                                                                                                                                                                                    | No  |                                                                 | 0 |
| 414 | Zheng SS, Xu X, Wu J, et al. Liver transplantation for hepatocellular carcinoma: Hangzhou experiences. <i>Transplantation</i> 2008;85(12):1726-32 doi: 10.1097/TP.0b013e31816b67e4published Online First.                                                                                                | Transplantation                                        | 2008 | Livers |    | 195 | 2000/1  | 2007/1  | Yes | Informed consents were obtained from all donors and recipients before transplantation. Each organ donation or transplantation in our center was strictly under the guideline of the Ethical Committee of our hospital, the regulation of Organ Transplant Committee of Zhejiang province and the declaration of Helsinki.                                                                                                                                                                                                                          | No  |                                                                 | 0 |
| 415 | Zheng Z, Gao S, Yang Z, et al. Single nucleotide polymorphisms in the metastasis associated in colon cancer-1 gene predict the recurrence of hepatocellular carcinoma after transplantation. <i>Int J Med Sci</i> 2014;11(2):142-50 doi: 10.7150/ijms.7142published Online First.                        | International Journal of Medical Sciences              | 2014 | Livers |    | 187 | 2003    | 2012    | Yes | This study protocol was approved by the Ethical Review Committee of the First Affiliated Hospital, School of Medicine, Zhejiang University, and informed consent was obtained according to the Declaration of Helsinki.                                                                                                                                                                                                                                                                                                                            | No  |                                                                 | 0 |
| 416 | Zheng Z, Lin B, Zhang J, et al. Absolute lymphocyte count recovery at 1 month after transplantation predicts favorable outcomes of patients with hepatocellular carcinoma. <i>Journal of Gastroenterology and Hepatology (Australia)</i> 2015;30(4):706-11 doi: 10.1111/jgh.12782published Online First. | Journal of Gastroenterology and Hepatology (Australia) | 2015 | Livers |    | 269 | 2004    | 2013    | Yes | This study was approved by the Ethical Review Committee of the First Affiliated Hospital, School of Medicine, Zhejiang University, and informed consent was obtained according to the Declaration of Helsinki.                                                                                                                                                                                                                                                                                                                                     | No  |                                                                 | 0 |
| 417 | Zhenglu W, Hui L, Shuying Z, et al. A clinical-pathological analysis of drug-induced hepatic injury after liver transplantation. <i>Transplant Proc</i> 2007;39(10):3287-91 doi: 10.1016/j.transproceed.2007.08.096published Online First.                                                               | Transplantation Proceedings                            | 2007 | Livers |    | 131 | 2000/6  | 2006/8  | No  |                                                                                                                                                                                                                                                                                                                                                                                                                                                                                                                                                    | No  |                                                                 | 0 |
| 418 | Zhong L, Li H, Li Z, et al. C7 genotype of the donor may predict early bacterial infection after liver transplantation. <i>Sci Rep</i> 2016;6:24121 Online First.                                                                                                                                        | Scientific Reports                                     | 2016 | Livers |    | 190 | 2007/7  | 2011/1  | Yes | Written informed consent was obtained from all donors and recipients. All organ donations or transplantations were approved by the Institutional Review Board, Shanghai Jiaotong University Affiliated First Peoples Hospital (China), and carried out strictly in accordance with the guidelines of the Ethics Committee of the hospital and the Declaration of Helsinki <sup>23</sup> . All LT recipients were evaluated using the United Network for Organ Sharing Model for End-Stage Liver Disease (UNOS MELD) scoring system <sup>24</sup> . | Yes | None of the donor livers were obtained from executed prisoners. | 0 |
| 419 | Zhong L, Men TY, Li H, et al. Multidrug-resistant gram-negative bacterial infections after liver transplantation - Spectrum and risk factors. <i>J Infect</i> 2012;64(3):299-310 doi: 10.1016/j.jinf.2011.12.005published Online First.                                                                  | Journal of Infection                                   | 2012 | Livers | DD | 217 | 2007/1  | 2010/4  | Yes | This study was approved by the hospital ethical committee and was performed in accordance with the Declaration of Helsinki. <sup>12</sup> All the LT recipients were evaluated using UNOS MELD scoring system. <sup>13</sup> All LTs were performed using cadaveric livers and orthotopic liver transplants (OLT)                                                                                                                                                                                                                                  | No  |                                                                 | 0 |



|     | A                                                                                                                                                                                                                                                                                                       | B                                                | C    | D      | E  | F    | G       | H       | I   | J                                                                                                                                                                                                                                                                                                                                                                      | K  | L | M   |
|-----|---------------------------------------------------------------------------------------------------------------------------------------------------------------------------------------------------------------------------------------------------------------------------------------------------------|--------------------------------------------------|------|--------|----|------|---------|---------|-----|------------------------------------------------------------------------------------------------------------------------------------------------------------------------------------------------------------------------------------------------------------------------------------------------------------------------------------------------------------------------|----|---|-----|
| 420 | Zhong X, Zhang W, Xu J, et al. Human parvovirus B19 infection induced pure red cell aplasia in liver transplant recipients. <i>Int J Clin Pract</i> 2015;69(S183):29-34 Online First.                                                                                                                   | International Journal of Clinical Practice       | 2015 | Livers | DD | 13   | 2011/11 | 2014/5  | Yes | We obtained ethical approval from the Committee of Ethics in Biomedical Research of Zhejiang University. Informed consent was obtained from each recipient included in the study. The study protocol conformed to the ethical guidelines of the 1975 Declaration of Helsinki as reflected in a priori approval by the institution's human research committee.          | No |   | DCD |
| 421 | Zhong ZQ, Luo AJ, Wan QQ, et al. Pseudomonas aeruginosa infection among liver transplant recipients: a clinical analysis of 15 cases. <i>Transplant Proc</i> 2016;48(6):2130-34 Online First.                                                                                                           | Transplantation Proceedings                      | 2016 | Livers | DD | 15   | 2003/1  | 2015/6  | No  |                                                                                                                                                                                                                                                                                                                                                                        | No |   | 0   |
| 422 | Zhongyang S, Yihe L, Lixin Y, et al. An experience from China of perioperative care in 1510 liver transplant recipients. <i>Int Anesthesiol Clin</i> 2006;44(4):121-26 doi: 10.1097/01.aia.0000210820.31029.92published Online First.                                                                   | International Anesthesiology Clinics             | 2006 | Livers | DD | 1510 | 2000/1  | 2005/6  | No  |                                                                                                                                                                                                                                                                                                                                                                        | No |   | 0   |
| 423 | Zhou B, Shan H, Zhu KS, et al. Chemoembolization with lobaplatin mixed with iodized oil for unresectable recurrent hepatocellular carcinoma after orthotopic liver transplantation. <i>J Vasc Interv Radiol</i> 2010;21(3):333-38 doi: 10.1016/j.jvir.2009.11.006published Online First.                | Journal of Vascular and Interventional Radiology | 2010 | Livers |    | 726  | 2003/11 | 2007/10 | Yes | This retrospective study was approved by the institutional reviewboard of our hospital, and written in-formed consent was obtained from allpatients and their family members ac-cording to hospital guidelines.                                                                                                                                                        | No |   | 0   |
| 424 | Zhou J, Fan J, Wang JH, et al. Continuous transcatheter arterial thrombolysis for early hepatic artery thrombosis after liver transplantation. <i>Transplant Proc</i> 2005;37(10):4426-29 doi: 10.1016/j.transproceed.2005.10.113published Online First.                                                | Transplantation Proceedings                      | 2005 | Livers |    | 287  | 2001/4  | 2005/4  | No  |                                                                                                                                                                                                                                                                                                                                                                        | No |   | 0   |
| 425 | Zhou J, Huang H, Liu S, et al. Staphylococcus Aureus bacteremias following liver transplantation: A clinical analysis of 20 cases. <i>Ther Clin Risk Manag</i> 2015;11:933-37 doi: 10.2147/TCRM.S84579published Online First.                                                                           | Therapeutics and Clinical Risk Management        | 2015 | Livers |    | 20   | 2001/1  | 2014/12 | No  |                                                                                                                                                                                                                                                                                                                                                                        | No |   | 0   |
| 426 | Zhou J, Ju W, Yuan X, et al. ABO-incompatible liver transplantation for severe hepatitis B patients. <i>Transpl Int</i> 2015;28(7):793-99 doi: 10.1111/tri.12531published Online First.                                                                                                                 | Transplant International                         | 2015 | Livers |    | 103  | 2006/1  | 2010/12 | Yes | This study has beenapproved by the local ethical committee before liver trans-plantation, and the signed informed consents have beenobtained.                                                                                                                                                                                                                          | No |   | 0   |
| 427 | Zhou J, Wang Z, Qiu SJ, et al. Surgical treatment for early hepatocellular carcinoma: Comparison of resection and liver transplantation. <i>J Cancer Res Clin Oncol</i> 2010;136(9):1453-60 doi: 10.1007/s00432-010-0802-2published Online First.                                                       | Journal of Cancer Research and Clinical Oncology | 2010 | Livers | DD | 1105 | 2003/1  | 2007/12 | Yes | Allexcept two patients who underwent LT received deceaseddonor LT. Informed consents were obtained from all donorsand recipients before transplantation. Each organ donationor transplant in our center was strictly under the guidelineof the Ethical Committee of our hospital, the regulation ofOrgan Transplant Committee of China and the declarationof Helsinki. | No |   | 0   |
| 428 | Zhou J, Wang Z, Wu ZQ, et al. Sirolimus-based immunosuppression therapy in liver transplantation for patients with hepatocellular carcinoma exceeding the milan criteria. <i>Transplant Proc</i> 2008;40(10):3548-53 doi: 10.1016/j.transproceed.2008.03.165published Online First.                     | Transplantation Proceedings                      | 2008 | Livers |    | 73   | 2004/3  | 2005/12 | Yes | This study was conducted in accordance with the guidelines ofethics committee of our institution; informed consent was obtainedfrom all participants                                                                                                                                                                                                                   | No |   | 0   |
| 429 | Zhou L, Fan J, Zheng SS, et al. Prevalence of human cytomegalovirus UL97 D605E mutation in transplant recipients in China. <i>Transplant Proc</i> 2006;38(9):2926-28 doi: 10.1016/j.transproceed.2006.08.161published Online First.                                                                     | Transplantation Proceedings                      | 2006 | Livers |    | 5    | 0       | 0       | No  |                                                                                                                                                                                                                                                                                                                                                                        | No |   | 0   |
| 430 | Zhou L, Wei B, Xing C, et al. Polymorphism in 3'-untranslated region of toll-like receptor 4 gene is associated with protection from hepatitis B virus recurrence after liver transplantation. <i>Transpl Infect Dis</i> 2011;13(3):250-58 doi: 10.1111/j.1399-3062.2010.00574.xpublished Online First. | Transplant Infectious Disease                    | 2011 | Livers |    | 125  | 2004    | 2008    | Yes | This study was approved by the Ethical Review Committee of the First Affiliated Hospital, School of Medicine, Zhejiang University, and informed consent was obtained from all patients.                                                                                                                                                                                | No |   | 0   |
| 431 | Zhou L, Zhou W, Wu L, et al. The association of frequent allelic loss on 17p13.1 with early metastatic recurrence of hepatocellular carcinoma after liver transplantation. <i>J Surg Oncol</i> 2010;102(7):802-08 doi: 10.1002/jso.21743published Online First.                                         | Journal of Surgical Oncology                     | 2010 | Livers |    | 37   | 0       | 0       | Yes | This study was approved by the Ethical Review Committee of the First Affiliated Hospital, School of Medicine, Zhejiang University, and informed consent was obtained according to the Declaration of Helsinki                                                                                                                                                          | No |   | 0   |
| 432 | Zhou Q, Wang Y, Zhou X, et al. Prognostic analysis for treatment modalities in hepatocellular carcinomas with portal vein tumor thrombi. <i>Asian Pac J Cancer Prev</i> 2011;12(11):2847-50 Online First.                                                                                               | Asian Pacific Journal of Cancer Prevention       | 2011 | Livers | DD | 12   | 2003/1  | 2010/6  | No  |                                                                                                                                                                                                                                                                                                                                                                        | No |   | DCD |

|     | A                                                                                                                                                                                                                                                                                                    | B                                                                               | C    | D      | E  | F   | G       | H       | I   | J                                                                                                                                                                                                                                                                                                                                                                            | K   | L                                                                                                                                                    | M            |
|-----|------------------------------------------------------------------------------------------------------------------------------------------------------------------------------------------------------------------------------------------------------------------------------------------------------|---------------------------------------------------------------------------------|------|--------|----|-----|---------|---------|-----|------------------------------------------------------------------------------------------------------------------------------------------------------------------------------------------------------------------------------------------------------------------------------------------------------------------------------------------------------------------------------|-----|------------------------------------------------------------------------------------------------------------------------------------------------------|--------------|
| 433 | Zhou ZB, Shao XX, Yang XY, et al. Influence of Hydroxyethyl starch on renal function after orthotopic liver transplantation. <i>Transplant Proc</i> 2015;47(6):1616-19 doi: 10.1016/j.transproceed.2015.04.095published Online First.                                                                | Transplantati<br>on<br>Proceedings                                              | 2015 | Livers |    | 394 | 2003/5  | 2013/12 | No  |                                                                                                                                                                                                                                                                                                                                                                              | No  |                                                                                                                                                      | 0            |
| 434 | Zhu B, Chen Y, Xie Y, et al. Kaposi's sarcoma-associated herpesvirus (KSHV) infection: Endemic strains and cladograms from immunodeficient patients in China. <i>J Clin Virol</i> 2008;42(1):7-12 Online First.                                                                                      | Journal of<br>Clinical<br>Virology                                              | 2008 | Livers |    | 33  | 0       | 0       | No  |                                                                                                                                                                                                                                                                                                                                                                              | No  |                                                                                                                                                      | 0            |
| 435 | Zhu L, Wang H, Rao W, et al. A limited sampling strategy for tacrolimus in liver transplant patients. <i>Int J Clin Pharmacol Ther</i> 2013;51(6):509-12 doi: 10.5414/CP201876published Online First.                                                                                                | International<br>Journal of<br>Clinical<br>Pharmacolog<br>y and<br>Therapeutics | 2013 | Livers |    | 26  | 0       | 0       | No  |                                                                                                                                                                                                                                                                                                                                                                              | No  |                                                                                                                                                      | 0            |
| 436 | Zhu L, Yang J, Jing Y, et al. Effects of CYP3A5 genotypes, ABCB1 C3435T and G2677T/A polymorphism on pharmacokinetics of Tacrolimus in Chinese adult liver transplant patients. <i>Xenobiotica</i> 2015;45(9):840-46 Online First.                                                                   | Xenobiotica                                                                     | 2015 | Livers |    | 95  | 2013    | 2014    | Yes | Approval was obtained from the hospital's ethics committee for the study. Informed verbal consent was obtained from the patients or their caregivers for blood sampling in addition to those required for routine TDM                                                                                                                                                        | No  |                                                                                                                                                      | 0            |
| 437 | Zhu M, Li Y, Xia Q, et al. Strong impact of acute kidney injury on survival after liver transplantation. <i>Transplant Proc</i> 2010;42(9):3634-38 doi: 10.1016/j.transproceed.2010.08.059published Online First.                                                                                    | Transplantati<br>on<br>Proceedings                                              | 2010 | Livers | DD | 193 | 2004/10 | 2006/1  | Yes | This study was approved by our Ethics Committee to review medical records and radiology and laboratory results                                                                                                                                                                                                                                                               | Yes | No prisoners or organs from prisoners were used in the collection of these data                                                                      | 0            |
| 438 | Zhu Q, Zhou L, Yang Z, et al. O-GlcNAcylation plays a role in tumor recurrence of hepatocellular carcinoma following liver transplantation. <i>Med Oncol</i> 2012;29(2):985-93 doi: 10.1007/s12032-011-9912-1published Online First.                                                                 | Medical<br>Oncology                                                             | 2012 | Livers |    | 60  | 2003    | 2005    | Yes | This study was approved by the local ethics committee and informed consent was obtained from all of the patients.                                                                                                                                                                                                                                                            | No  |                                                                                                                                                      | 0            |
| 439 | Zhu X, Wu Y, Qiu Y, et al. Effects of 2-3 fish oil lipid emulsion combined with parenteral nutrition on patients undergoing liver transplantation. <i>Journal of Parenteral and Enteral Nutrition</i> 2013;37(1):68-74 doi: 10.1177/0148607112440120published Online First.                          | Journal of<br>Parenteral<br>and Enteral<br>Nutrition                            | 2013 | Livers |    | 98  | 2006/1  | 2010/7  | Yes | The protocol was approved by the ethical committee of the Affiliated Drum Tower Hospital. and This was a randomized, controlled clinical study carried out in the Department of Hepatobiliary Surgery according to the principles and guidelines of the Helsinki Declaration of 1975 as revised in 2000                                                                      | No  |                                                                                                                                                      | 0            |
| 440 | Zhu XD, Shen ZY, Chen XG, et al. Pathotyping and clinical manifestations of biliary cast syndrome in patients after an orthotopic liver transplant. <i>Exp Clin Transplant</i> 2013;11(2):142-49 doi: 10.6002/ect.2012.0035published Online First.                                                   | Experimental<br>and Clinical<br>Transplantati<br>on                             | 2013 | Livers |    | 103 | 2002/4  | 2006/3  | Yes | All protocols were approved by the ethics committee of the institution before the study began, and the protocols conformed with the ethical guidelines of the 1975 Helsinki Declaration.                                                                                                                                                                                     | No  |                                                                                                                                                      | 0            |
| 441 | Zhu XS, Gao YH, Wang SS, et al. Contrast-enhanced ultrasound diagnosis of splenic artery steal syndrome after orthotopic liver transplantation. <i>Liver Transpl</i> 2012;18(8):966-71 doi: 10.1002/lt.23453published Online First.                                                                  | Liver<br>Transplantati<br>on                                                    | 2012 | Livers | DD | 247 | 2003/8  | 2010/12 | Yes | This retrospective study was approved by the ethics committee of the Center for Liver Disease and Transplantation (General Hospital of the Guangzhou Military Command of the People's Liberation Army) and was in compliance with the Declaration of Helsinki; informed consent was obtained from all patients or relatives.                                                 | Yes | Severe injuries and traffic accidents were the main reasons for DCD. WR This implies volunteer donors rather than prisoners, but it is not explicit. | DCD +<br>DBD |
| 442 | Zhu XS, Wang SS, Cheng Q, et al. Using ultrasonography to monitor liver blood flow for liver transplant from donors supported on extracorporeal membrane oxygenation. <i>Liver Transpl</i> 2016;22(2):188-91 doi: 10.1002/lt.24318published Online First.                                            | Liver<br>Transplantati<br>on                                                    | 2016 | Livers | DD | 40  | 0       | 0       | Yes | Written informed consent was obtained from relatives of all patients. The study was approved by the Ethics Committee of Liver Transplantation of Guangzhou General Hospital of Guangzhou, Military Region and the institutional review board.                                                                                                                                | Yes | Written informed consent was obtained from relatives of all patients.                                                                                | DBD          |
| 443 | Zhu ZJ, Shen ZY, Gao W, et al. Feasibility of using a liver infected with <i>Clonorchis sinensis</i> for liver transplantation: Fourteen cases. <i>Liver Transpl</i> 2010;16(12):1440-42 doi: 10.1002/lt.22147published Online First.                                                                | Liver<br>Transplantati<br>on                                                    | 2010 | Livers | DD | 14  | 2003/5  | 2009/12 | No  |                                                                                                                                                                                                                                                                                                                                                                              | No  |                                                                                                                                                      | DCD          |
| 444 | Zicheng Y, Weixia Z, Hao C, et al. Limited sampling strategy for the estimation of mycophenolic acid area under the plasma concentration-time curve in adult patients undergoing liver transplant. <i>Ther Drug Monit</i> 2007;29(2):207-14 doi: 10.1097/FTD.0b013e318040ce0bpublished Online First. | Therapeutic<br>Drug<br>Monitoring                                               | 2007 | Livers |    | 38  | 0       | 0       | Yes | The study protocol was approved by the independent ethics committee of Ruijin Hospital affiliated to Shanghai Jiao Tong University School of Medicine and written informed consent was obtained from each patient. Thus, this research work was performed in accordance with the ethical standards of the Helsinki declaration on research ethics of 1975 (revised in 1996). | No  |                                                                                                                                                      | 0            |

|     | A                                                                                                                                                                                                                                                                                             | B                        | C    | D      | E  | F   | G      | H      | I   | J                                                                                                                                                                                          | K  | L | M |
|-----|-----------------------------------------------------------------------------------------------------------------------------------------------------------------------------------------------------------------------------------------------------------------------------------------------|--------------------------|------|--------|----|-----|--------|--------|-----|--------------------------------------------------------------------------------------------------------------------------------------------------------------------------------------------|----|---|---|
| 445 | Zou SJ, Chen D, Li YZ, et al. Monitoring hepatocyte dysfunction and biliary complication after liver transplantation using quantitative hepatobiliary scintigraphy. <i>Medicine (United States)</i> 2015;94(45):e2009 doi: 10.1097/MD.0000000000002009 published Online First.                | Medicine (United States) | 2015 | Livers |    | 57  | 2011/1 | 2014/1 | Yes | This study was approved by the independent ethics committee of Tongji Hospital, Tongji Medical College, Huazhong University of Science and Technology.                                     | No |   | 0 |
| 446 | Zou Y, Yang X, Jiang X, et al. High levels of soluble Major Histocompatibility Complex class I related chain A (MICA) are associated with biliary cast syndrome after liver transplantation. <i>Transpl Immunol</i> 2009;21(4):210-14 doi: 10.1016/j.trim.2009.06.003 published Online First. | Transplant Immunology    | 2009 | Livers | DD | 133 | 2005   | 2007   | Yes | The University human experimentation study committee approved the study protocol. For the protection of human subjects, all research data were coded without linking to their identifiers. | No |   | 0 |

For peer review only

**Supplementary File 5: Bibliographic details of 63 studies containing some information regarding identity of and/or consent by organ sources/donors.**

**Note: these 63 studies are a subset of the 445 papers reported in the study and their details are also included in Supplementary file 3.**

1. Chen J, Wang Y, Shen Z, et al. Early diagnostic value of plasma PCT and BG assay for CRBSI after OLT. *Transplant Proc* 2011;43(5):1777-79 Online First.
2. Chen Y, Zhang H, Xiao X, et al. Peripheral blood transcriptome sequencing reveals rejection-relevant genes in long-term heart transplantation. *Int J Cardiol* 2013;168(3):2726-33 doi: 10.1016/j.ijcard.2013.03.095 published Online First.
3. Chen YB, Li SD, Ju BL, et al. Suitable calcineurin inhibitor concentrations for liver transplant recipients in the Chinese population. *Transplant Proc* 2011;43(5):1751-53 doi: 10.1016/j.transproceed.2010.11.025 published Online First.
4. Chen Z, Gong R, Luo Y, et al. Surgical procedures for hepatolithiasis. *Hepatogastroenterology* 2010;57(97):134-7 Online First.
5. Chen ZY, Yan LN, Zeng Y, et al. Preliminary experience with indications for liver transplantation for hepatolithiasis. *Transplant Proc* 2008;40(10):3517-22 doi: 10.1016/j.transproceed.2008.07.142 published Online First.
6. Chu Z, Zhang J, Zhao Y, et al. Influence of immunosuppressive drugs on the development of CD4<sup>+</sup>CD25<sup>high</sup>Foxp3<sup>+</sup> T cells in liver transplant recipients. *Transplant Proc* 2010;42(7):2599-601 doi: 10.1016/j.transproceed.2010.04.026 published Online First.
7. Fan J, Yang GS, Fu ZR, et al. Liver transplantation outcomes in 1,078 hepatocellular carcinoma patients: A multi-center experience in Shanghai, China. *J Cancer Res Clin Oncol* 2009;135(10):1403-12 doi: 10.1007/s00432-009-0584-6 published Online First.
8. Fan X, Chen Z, Nasralla D, et al. The organ preservation and enhancement of donation success ratio effect of extracorporeal membrane oxygenation in circulatory unstable brain death donor. *Clin Transplant* 2016;30(10):1306-13 Online First.
9. Gao Y, Ren H, Meng F, et al. Pathological roles of interleukin-22 in the development of recurrent hepatitis C after liver transplantation. *PLoS One* 2016;11(4) doi: 10.1371/journal.pone.0154419 published Online First.
10. Gao Y, Zhang M, Li J, et al. Circulating FoxP3<sup>+</sup> regulatory T and interleukin17-producing Th17 cells actively influence HBV clearance in De Novo Hepatitis B virus infected patients after orthotopic liver transplantation. *PLoS One* 2015;10(9) doi: 10.1371/journal.pone.0137881 published Online First.

11. Gao YJ, Zhang M, Jin B, et al. A clinical-pathological analysis of hepatitis B virus recurrence after liver transplantation in Chinese patients. *Journal of Gastroenterology and Hepatology (Australia)* 2014;29(3):554-60 doi: 10.1111/jgh.12404 published Online First.
12. Gu L, Yu YC. Clinical outcome of dental implants placed in liver transplant recipients after 3 years: A case series. *Transplant Proc* 2011;43(7):2678-82 doi: 10.1016/j.transproceed.2011.06.037 published Online First.
13. Gu Y, Li J, Li N. Insulin sensitivity after pancreaticoduodenal transplantation with systemic and portal venous drainage in inbred rats. *Chin Med J* 2002;115(4):549-51 Online First.
14. Hu XX, Yan LN. Retrospective analysis of prognostic factors after liver transplantation for intrahepatic cholangiocarcinoma in China: A single-center experience. *Hepatogastroenterology* 2011;58(109):1255-59 doi: 10.5754/hge10704 published Online First.
15. Jiang L, Lei JY, Wang WT, et al. Immediate radical therapy or conservative treatments when meeting the Milan criteria for advanced HCC patients after successful TACE. *J Gastrointest Surg* 2014;18(6):1125-30 Online First.
16. Lei J, Yan L. Outcome comparisons among the Hangzhou, Chengdu, and UCSF criteria for hepatocellular carcinoma liver transplantation after successful downstaging therapies. *J Gastrointest Surg* 2013;17(6):1116-22 doi: 10.1007/s11605-013-2140-6 published Online First.
17. Lei JY, Wang WT, Yan LN. Hangzhou criteria for liver transplantation in hepatocellular carcinoma: A single-center experience. *Eur J Gastroenterol Hepatol* 2014;26(2):200-04 doi: 10.1097/MEG.0b013e3283652b66 published Online First.
18. Lei JY, Yan LN, Wang WT, et al. Health-related quality of life and psychological distress in patients with early-stage hepatocellular carcinoma after hepatic resection or transplantation. *Transplant Proc* 2016;48(6):2107-11 Online First.
19. Li F, Yang M, Li B, et al. Initial clinical results of orthotopic liver transplantation for hepatic alveolar echinococcosis. *Liver Transpl* 2007;13(6):924-26 doi: 10.1002/lt.21187 published Online First.
20. Li H, He JW, Fu BS, et al. Immunosuppressant-related hip pain after orthotopic liver transplant. *Exp Clin Transplant* 2013;11(1):32-38 doi: 10.6002/ect.2012.0026 published Online First.
21. Li H, Li J, Wang Y, et al. Proteomic analysis of effluents from perfused human heart for transplantation: Identification of potential biomarkers for ischemic heart damage. *Proteome Science* 2012;10(1) doi: 10.1186/1477-5956-10-21 published Online First.
22. Li J, Liu B, Yan LN, et al. Reversal of graft steatosis after liver transplantation: prospective study. *Transplant Proc* 2009;41(9):3560-63 doi: 10.1016/j.transproceed.2009.06.222 published Online First.

- 1  
2  
3  
4 23. Li WX, Li Z, Gao PJ, et al. Histological differentiation predicts post-liver transplantation  
5 survival time. *Clinics and Research in Hepatology and Gastroenterology* 2014;38(2):201-08 doi:  
6 10.1016/j.clinre.2013.11.002published Online First.  
7  
8  
9 24. Lin B, Geng L, Zheng Z, et al. The predictive value of blood neutrophil-lymphocyte ratio  
10 in patients with end-stage liver cirrhosis following ABO-incompatible liver transplantation. *J Res*  
11 *Med Sci* 2016;21(5):20-25 Online First.  
12  
13 25. Lin XH, Teng S, Wang L, et al. Fatigue and its associated factors in liver transplant  
14 recipients in Beijing: A cross-sectional study. *BMJ Open* 2017;7 (2) Online First.  
15  
16 26. Ling Q, Xie H, Li J, et al. Donor graft microRNAs: A newly identified player in the  
17 development of new-onset diabetes after liver transplantation. *Am J Transplant* 2017;17(1):255-  
18 64 Online First.  
19  
20 27. Ling Q, Xie H, Lu D, et al. Association between donor and recipient TCF7L2 gene  
21 polymorphisms and the risk of new-onset diabetes mellitus after liver transplantation in a Han  
22 Chinese population. *J Hepatol* 2013;58(2):271-77 doi: 10.1016/j.jhep.2012.09.025published  
23 Online First.  
24  
25 28. Ling Q, Xu X, Wang K, et al. Donor PPAR $\gamma$  Gene polymorphisms influence the  
26 susceptibility to glucose and lipid disorders in liver transplant recipients. *Medicine (United*  
27 *States)* 2015;94(35):e1421 doi: 10.1097/MD.0000000000001421published Online First.  
28  
29 29. Liu C, Tsai HL, Chin T, et al. Experience of surgical treatment for hepatoblastoma.  
30 *Formosan Journal of Surgery* 2016;49(2):56-62 Online First.  
31  
32 30. Liu S, Bai Y, Huang J, et al. Do mitochondria contribute to left ventricular non-  
33 compaction cardiomyopathy? New findings from myocardium of patients with left ventricular  
34 non-compaction cardiomyopathy. *Mol Genet Metab* 2013;109(1):100-06 Online First.  
35  
36 31. Liu X, Wang B, Zhang X, et al. Liver transplantation using donation after brain and  
37 cardiac death: A single-center experience in China. *Transplant Proc* 2016;48(6):1879-86 Online  
38 First.  
39  
40 32. Liu Y, Liu YY, Li CP, et al. Comprehensive comparison of three different  
41 immunosuppressive regimens for liver transplant patients with hepatocellular carcinoma:  
42 Steroid-free immunosuppression, induction immunosuppression and standard  
43 immunosuppression. *PLoS One* 2015;10 (3) Online First.  
44  
45 33. Lu D, Xu X, Wang J, et al. The influence of a contemporaneous portal and hepatic artery  
46 revascularization protocol on biliary complications after liver transplantation. *Surgery (United*  
47 *States)* 2014;155(1):190-95 doi: 10.1016/j.surg.2013.06.056published Online First.  
48  
49  
50  
51  
52  
53  
54  
55  
56  
57  
58  
59  
60

- 1  
2  
3 34. Mu HJ, Xie P, Chen JY, et al. Association of TNF- $\alpha$ , TGF- $\beta$ 1, IL-10, IL-6, and IFN- $\gamma$   
4 gene polymorphism with acute rejection and infection in lung transplant recipients. *Clin*  
5 *Transplant* 2014;28(9):1016-24 doi: 10.1111/ctr.12411published Online First.  
6  
7  
8 35. Pan C, Shi Y, Zhang JJ, et al. Single-Center experience of 253 portal vein thrombosis  
9 patients undergoing liver transplantation in China. *Transplant Proc* 2009;41(9):3761-65 doi:  
10.1016/j.transproceed.2009.06.215published Online First.  
11  
12 36. Ran JH, Zhang SN, Liu J, et al. In-hospital and follow-up outcomes of patients  
13 undergoing orthotopic liver transplantation after hepatic artery reconstruction with an iliac  
14 interposition graft. *Int J Clin Exp Med* 2016;9(2):3939-45 Online First.  
15  
16  
17 37. Sun XY, Dong JH, Qin K, et al. Single center study on transplantation of livers donated  
18 after cardiac death: A report of 6 cases. *Exp Ther Med* 2016;11(3):988-92 doi:  
19 10.3892/etm.2016.3001published Online First.  
20  
21  
22 38. Wang SY, Tang HM, Chen GQ, et al. Effect of ursodeoxycholic acid administration after  
23 liver transplantation on serum liver tests and biliary complications: A randomized clinical trial.  
24 *Digestion* 2012;86(3):208-17 doi: 10.1159/000339711published Online First.  
25  
26  
27 39. Wang Y, Liu Y, Han R, et al. Monitoring of CD95 and CD38 expression in peripheral  
28 blood T lymphocytes during active human cytomegalovirus infection after orthotopic liver  
29 transplantation. *Journal of Gastroenterology and Hepatology (Australia)* 2010;25(1):138-42 doi:  
30 10.1111/j.1440-1746.2009.05966.xpublished Online First.  
31  
32 40. Wang Y, Shen Z, Zhu Z, et al. Clinical values of AFP, GPC3 mRNA in peripheral blood  
33 for prediction of hepatocellular carcinoma recurrence following OLT. *Hepatitis Monthly*  
34 2011;11(3):195-99 Online First.  
35  
36  
37 41. Xiao L, Fu ZR, Ding GS, et al. Prediction of survival after liver transplantation for  
38 chronic severe hepatitis b based on preoperative prognostic scores: A single center's experience  
39 in China. *World J Surg* 2009;33(11):2420-26 doi: 10.1007/s00268-009-0183-3published Online  
40 First.  
41  
42  
43 42. Xu J, Shen ZY, Chen XG, et al. A randomized controlled trial of licartin for preventing  
44 hepatoma recurrence after liver transplantation. *Hepatology* 2007;45(2):269-76 doi:  
45 10.1002/hep.21465published Online First.  
46  
47  
48 43. Xu X, Guo HJ, Xie HY, et al. ZIP4, a novel determinant of tumor invasion in  
49 hepatocellular carcinoma, contributes to tumor recurrence after liver transplantation. *Int J Biol*  
50 *Sci* 2014;10(3):245-56 doi: 10.7150/ijbs.7401published Online First.  
51  
52 44. Xu X, Ling Q, Gao F, et al. Hepatoprotective effects of marine and kuhuang in liver  
53 transplant recipients. *Am J Chin Med* 2009;37(1):27-34 Online First.  
54  
55  
56  
57  
58  
59

- 1  
2  
3 45. Xu X, Ling Q, Wang J, et al. Donor miR-196a-2 polymorphism is associated with  
4 hepatocellular carcinoma recurrence after liver transplantation in a Han Chinese population. *Int J*  
5 *Cancer* 2016;138(3):620-29 Online First.  
6  
7  
8 46. Xu X, Ling Q, Zhang M, et al. Outcome of patients with hepatorenal syndrome type 1  
9 after liver transplantation: Hangzhou experience. *Transplantation* 2009;87(10):1514-19 doi:  
10.1097/TP.0b013e3181a4430b published Online First.  
10  
11  
12 47. Xu X, Liu X, Ling Q, et al. Artificial liver support system combined with liver  
13 transplantation in the treatment of patients with acute-on-chronic liver failure. *PLoS One*  
14 2013;8(3) doi: 10.1371/journal.pone.0058738 published Online First.  
15  
16  
17 48. Xu X, Tu Z, Wang B, et al. A novel model for evaluating the risk of hepatitis B  
18 recurrence after liver transplantation. *Liver International* 2011;31(10):1477-84 doi:  
19 10.1111/j.1478-3231.2011.02500.x published Online First.  
20  
21  
22 49. Xue F, Higgs BW, Huang J, et al. HERC5 is a prognostic biomarker for post-liver  
23 transplant recurrent human hepatocellular carcinoma. *J Transl Med* 2015;13(1) doi:  
24 10.1186/s12967-015-0743-2 published Online First.  
25  
26  
27 50. Yan L, Li B, Wen T, et al. Prophylaxis Against hepatitis B recurrence posttransplantation  
28 using lamivudine and individualized low-dose hepatitis B immunoglobulin. *Am J Transplant*  
29 2010;10(8):1861-69 Online First.  
30  
31  
32 51. Yang X, Lu Q, Tang T, et al. Prediction of the prognosis after liver transplantation in  
33 severe hepatitis B-induced liver failure and clinical decision for liver transplantation. *J Surg Res*  
34 2013;183(2):846-51 doi: 10.1016/j.jss.2013.01.034 published Online First.  
35  
36  
37 52. Yu S, Yu J, Zhang W, et al. Safe use of liver grafts from hepatitis B surface antigen  
38 positive donors in liver transplantation. *J Hepatol* 2014;61(4):809-15 Online First.  
39  
40  
41 53. Yu Z, Sun Z, Yu S, et al. Safety limitations of fatty liver transplantation can be extended  
42 to 40%: Experience of a single centre in China. *Liver International* 2016 Online First.  
43  
44  
45 54. Yuan X, Chen C, Zhou J, et al. Organ donation and transplantation from donors with  
46 systemic infection: A single-center experience. *Transplant Proc* 2016;48(7):2454-57 Online First.  
47  
48  
49 55. Yuefeng M, Weili F, Wenxiang T, et al. Long-term outcome of patients with lamivudine  
50 after early cessation of hepatitis B immunoglobulin for prevention of recurrent hepatitis B  
51 following liver transplantation. *Clin Transplant* 2011;25(4):517-22 Online First.  
52  
53  
54 56. Zhang D, Jiao Z, Han J, et al. Clinicopathological features of hepatitis B virus recurrence  
55 after liver transplantation: Eleven-year experience. *Int J Clin Exp Pathol* 2014;7(7):4057-66  
56  
57  
58  
59  
60



- 1  
2  
3 57. Zhang M, Yin F, Chen B, et al. Mortality risk after liver transplantation in hepatocellular  
4 carcinoma recipients: A nonlinear predictive model. *Surgery (United States)* 2012;151(6):889-97  
5 doi: 10.1016/j.surg.2011.12.034published Online First.  
6  
7  
8 58. Zhang M, Yin F, Chen B, et al. Pretransplant prediction of posttransplant survival for  
9 liver recipients with benign end-stage liver diseases: A nonlinear model. *PLoS One* 2012;7 (3)  
10 Online First.  
11  
12 59. Zhang Y, Yan L, Wen T, et al. Prophylaxis against hepatitis B virus recurrence after liver  
13 transplantation for hepatitis B virus-related end-stage liver diseases with severe hypersplenism  
14 and splenomegaly: Role of splenectomy. *J Surg Res* 2012;178(1):478-86 doi:  
15 10.1016/j.jss.2012.02.047published Online First.  
16  
17  
18 60. Zhong L, Li H, Li Z, et al. C7 genotype of the donor may predict early bacterial infection  
19 after liver transplantation. *Sci Rep* 2016;6:24121 Online First.  
20  
21  
22 61. Zhu M, Li Y, Xia Q, et al. Strong impact of acute kidney injury on survival after liver  
23 transplantation. *Transplant Proc* 2010;42(9):3634-38 doi:  
24 10.1016/j.transproceed.2010.08.059published Online First.  
25  
26  
27 62. Zhu XS, Gao YH, Wang SS, et al. Contrast-enhanced ultrasound diagnosis of splenic  
28 artery steal syndrome after orthotopic liver transplantation. *Liver Transpl* 2012;18(8):966-71 doi:  
29 10.1002/lt.23453published Online First.  
30  
31 63. Zhu XS, Wang SS, Cheng Q, et al. Using ultrasonography to monitor liver blood flow for  
32 liver transplant from donors supported on extracorporeal membrane oxygenation. *Liver Transpl*  
33 2016;22(2):188-91 doi: 10.1002/lt.24318published Online First.  
34  
35  
36  
37  
38  
39  
40  
41  
42  
43  
44  
45  
46  
47  
48  
49  
50  
51  
52  
53  
54  
55  
56  
57  
58  
59  
60

**Supplementary File 6: Full list of journals included in the study and number of papers per journal**

| Journal                                                     | Number |
|-------------------------------------------------------------|--------|
| Transplantation Proceedings                                 | 65     |
| PLoS ONE                                                    | 20     |
| Clinical Transplantation                                    | 16     |
| Liver Transplantation                                       | 15     |
| Hepato-Gastroenterology                                     | 14     |
| Experimental and Clinical Transplantation                   | 11     |
| Clinics and Research in Hepatology and Gastroenterology     | 8      |
| International Journal of Clinical and Experimental Medicine | 8      |
| Annals of Transplantation                                   | 7      |
| International Journal of Clinical Practice                  | 6      |
| Journal of Cancer Research and Clinical Oncology            | 6      |
| Transplantation                                             | 6      |
| European Journal of Gastroenterology and Hepatology         | 5      |
| Experimental and Therapeutic Medicine                       | 5      |
| Medical Oncology                                            | 5      |
| Medicine (United States)                                    | 5      |
| Surgery (United States)                                     | 5      |

|                                                        |   |
|--------------------------------------------------------|---|
| BMC Cancer                                             | 4 |
| European Journal of Clinical Pharmacology              | 4 |
| Genetics and Molecular Research                        | 4 |
| Hepatology International                               | 4 |
| Journal of Gastrointestinal Surgery                    | 4 |
| Journal of International Medical Research              | 4 |
| Liver International                                    | 4 |
| Oncotarget                                             | 4 |
| Therapeutic Drug Monitoring                            | 4 |
| Biomarkers                                             | 3 |
| Cytokine                                               | 3 |
| Gene                                                   | 3 |
| International Journal of Medical Sciences              | 3 |
| Journal of Gastroenterology and Hepatology (Australia) | 3 |
| Journal of Hepatology                                  | 3 |
| Journal of Surgical Research                           | 3 |
| Scientific Reports                                     | 3 |
| Transplant Infectious Disease                          | 3 |
| World Journal of Surgery                               | 3 |

|                                                      |   |
|------------------------------------------------------|---|
| Abdominal Imaging                                    | 2 |
| American Journal of Transplantation                  | 2 |
| Annals of Surgical Oncology                          | 2 |
| Archives of Medical Research                         | 2 |
| Asian Pacific Journal of Cancer Prevention           | 2 |
| BioMed Research International                        | 2 |
| BMC Infectious Diseases                              | 2 |
| Brazilian Journal of Medical and Biological Research | 2 |
| British Journal of Radiology                         | 2 |
| Cancer Letters                                       | 2 |
| Clinical Chemistry and Laboratory Medicine           | 2 |
| Clinical Imaging                                     | 2 |
| Digestion                                            | 2 |
| Digestive Diseases and Sciences                      | 2 |
| European Journal of Radiology                        | 2 |
| European Surgical Research                           | 2 |
| Hepatitis Monthly                                    | 2 |
| Hepatology                                           | 2 |
| Hepatology Research                                  | 2 |

|    |                                                                 |   |
|----|-----------------------------------------------------------------|---|
| 1  |                                                                 |   |
| 2  |                                                                 |   |
| 3  |                                                                 |   |
| 4  | Immunopharmacology and Immunotoxicology                         | 2 |
| 5  |                                                                 |   |
| 6  |                                                                 |   |
| 7  | International Journal of Clinical Pharmacology and Therapeutics | 2 |
| 8  |                                                                 |   |
| 9  |                                                                 |   |
| 10 | Journal of Cardiothoracic Surgery                               | 2 |
| 11 |                                                                 |   |
| 12 |                                                                 |   |
| 13 | Journal of Immunology Research                                  | 2 |
| 14 |                                                                 |   |
| 15 |                                                                 |   |
| 16 | Journal of Surgical Oncology                                    | 2 |
| 17 |                                                                 |   |
| 18 |                                                                 |   |
| 19 | Latin American Journal of Pharmacy                              | 2 |
| 20 |                                                                 |   |
| 21 |                                                                 |   |
| 22 | Medical Science Monitor                                         | 2 |
| 23 |                                                                 |   |
| 24 |                                                                 |   |
| 25 | Microbial Ecology                                               | 2 |
| 26 |                                                                 |   |
| 27 |                                                                 |   |
| 28 | OncoTargets and Therapy                                         | 2 |
| 29 |                                                                 |   |
| 30 |                                                                 |   |
| 31 | Pharmacogenomics                                                | 2 |
| 32 |                                                                 |   |
| 33 |                                                                 |   |
| 34 | Postgraduate Medical Journal                                    | 2 |
| 35 |                                                                 |   |
| 36 |                                                                 |   |
| 37 | Surgery Today                                                   | 2 |
| 38 |                                                                 |   |
| 39 |                                                                 |   |
| 40 | Therapeutics and Clinical Risk Management                       | 2 |
| 41 |                                                                 |   |
| 42 |                                                                 |   |
| 43 | Transplant Immunology                                           | 2 |
| 44 |                                                                 |   |
| 45 |                                                                 |   |
| 46 | Tumor Biology                                                   | 2 |
| 47 |                                                                 |   |
| 48 |                                                                 |   |
| 49 | World Journal of Surgical Oncology                              | 2 |
| 50 |                                                                 |   |
| 51 |                                                                 |   |
| 52 | Acta Anaesthesiologica Scandinavica                             | 1 |
| 53 |                                                                 |   |
| 54 |                                                                 |   |
| 55 | Acta Cardiologica                                               | 1 |
| 56 |                                                                 |   |
| 57 |                                                                 |   |
| 58 | Alcohol                                                         | 1 |
| 59 |                                                                 |   |
| 60 |                                                                 |   |

|                                                     |   |
|-----------------------------------------------------|---|
| American Journal of Chinese Medicine                | 1 |
| American Journal of Roentgenology                   | 1 |
| Annals of Hepatology                                | 1 |
| ASAIO Journal                                       | 1 |
| Asian Journal of Andrology                          | 1 |
| Biochemical and Biophysical Research Communications | 1 |
| Biomedicine and Pharmacotherapy                     | 1 |
| BMC Gastroenterology                                | 1 |
| BMC neurology                                       | 1 |
| BMJ Open                                            | 1 |
| Brain Imaging and Behavior                          | 1 |
| Brain Research                                      | 1 |
| Cancer Biology & Therapy                            | 1 |
| Cancer Biology and Therapy                          | 1 |
| Cancer Gene Therapy                                 | 1 |
| CardioVascular and Interventional Radiology         | 1 |
| Cell Biochemistry and Biophysics                    | 1 |
| Clinica Chimica Acta                                | 1 |
| Clinical and Developmental Immunology               | 1 |

|                                                          |   |
|----------------------------------------------------------|---|
| Clinical and Experimental Metastasis                     | 1 |
| Clinical Cancer Research                                 | 1 |
| Clinical Genetics                                        | 1 |
| Clinical Laboratory                                      | 1 |
| Clinical Pharmacokinetics                                | 1 |
| Clinical Therapeutics                                    | 1 |
| Clinical transplants                                     | 1 |
| Cytotherapy                                              | 1 |
| Diagnostic Pathology                                     | 1 |
| Digestive and Liver Disease                              | 1 |
| Digestive Surgery                                        | 1 |
| Disease Markers                                          | 1 |
| Drug Metabolism and Pharmacokinetics                     | 1 |
| European Journal of Medical Research                     | 1 |
| European Journal of Pharmaceutical Sciences              | 1 |
| European Review for Medical and Pharmacological Sciences | 1 |
| Focus on Alternative and Complementary Therapies         | 1 |
| Formosan Journal of Surgery                              | 1 |
| Gut and Liver                                            | 1 |

|                                                              |   |
|--------------------------------------------------------------|---|
| Human Vaccines and Immunotherapeutics                        | 1 |
| Interactive Cardiovascular and Thoracic Surgery              | 1 |
| International Anesthesiology Clinics                         | 1 |
| International Immunopharmacology                             | 1 |
| International Journal of Biological Sciences                 | 1 |
| International Journal of Cancer                              | 1 |
| International Journal of Cardiology                          | 1 |
| International Journal of Clinical & Experimental Pathology   | 1 |
| International Journal of Clinical and Experimental Pathology | 1 |
| International Journal of Clinical Oncology                   | 1 |
| International Journal of Hyperthermia                        | 1 |
| International Journal of Immunogenetics                      | 1 |
| Investigational New Drugs                                    | 1 |
| Journal of Cardiovascular Surgery                            | 1 |
| Journal of Clinical Nursing                                  | 1 |
| Journal of Clinical Pharmacology                             | 1 |
| Journal of Clinical Pharmacy and Therapeutics                | 1 |
| Journal of Clinical Virology                                 | 1 |
| Journal of Critical Care                                     | 1 |



|                                                    |   |
|----------------------------------------------------|---|
| Journal of Diabetes Investigation                  | 1 |
| Journal of Diabetes.                               | 1 |
| Journal of Gastrointestinal and Liver Diseases     | 1 |
| Journal of Hepato-Biliary-Pancreatic Sciences      | 1 |
| Journal of Infection                               | 1 |
| Journal of Nanoscience and Nanotechnology          | 1 |
| Journal of Occupational and Environmental Medicine | 1 |
| Journal of Parenteral and Enteral Nutrition        | 1 |
| Journal of Research in Medical Sciences            | 1 |
| Journal of Thoracic and Cardiovascular Surgery     | 1 |
| Journal of Thoracic Disease                        | 1 |
| Journal of Translational Medicine                  | 1 |
| Journal of Ultrasound in Medicine                  | 1 |
| Journal of Vascular and Interventional Radiology   | 1 |
| Journal of Virological Methods                     | 1 |
| Korean Journal of Radiology                        | 1 |
| Liver International.                               | 1 |
| Mediators of Inflammation                          | 1 |
| Medicinal Chemistry                                | 1 |

|                                                               |   |
|---------------------------------------------------------------|---|
| Metabolic Brain Disease                                       | 1 |
| Minerva Anestesiologica                                       | 1 |
| Molecular Carcinogenesis                                      | 1 |
| Molecular Genetics and Metabolism                             | 1 |
| Molecular Oncology                                            | 1 |
| Pakistan Journal of Medical Sciences                          | 1 |
| Pediatric Transplantation                                     | 1 |
| Pharmacology                                                  | 1 |
| Pharmazie                                                     | 1 |
| PLoS ONE [Electronic Resource]                                | 1 |
| Proteome Science                                              | 1 |
| Renal Failure                                                 | 1 |
| Respiratory Care                                              | 1 |
| Scandinavian Journal of Clinical and Laboratory Investigation | 1 |
| Surgical Practice                                             | 1 |
| Thrombosis Research                                           | 1 |
| Transplant International                                      | 1 |
| Tumori                                                        | 1 |
| Turkish Journal of Gastroenterology                           | 1 |

|                                    |   |
|------------------------------------|---|
| Ultrasound in Medicine and Biology | 1 |
| Viral Immunology                   | 1 |
| World Journal of Pediatrics        | 1 |
| Xenobiotica                        | 1 |

For peer review only

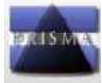

# PRISMA 2009 Checklist

| Section/topic             | # | Checklist item                                                                                                                                                                                                                                                                                              | Reported on page #                                                               |
|---------------------------|---|-------------------------------------------------------------------------------------------------------------------------------------------------------------------------------------------------------------------------------------------------------------------------------------------------------------|----------------------------------------------------------------------------------|
| <b>TITLE</b>              |   |                                                                                                                                                                                                                                                                                                             |                                                                                  |
| Title                     | 1 | Identify the report as a systematic review, meta-analysis, or both.                                                                                                                                                                                                                                         | Identified as a scoping report, Title page                                       |
| <b>ABSTRACT</b>           |   |                                                                                                                                                                                                                                                                                                             |                                                                                  |
| Structured summary        | 2 | Provide a structured summary including, as applicable: background; objectives; data sources; study eligibility criteria, participants, and interventions; study appraisal and synthesis methods; results; limitations; conclusions and implications of key findings; systematic review registration number. | Structured summary included; study not registered                                |
| <b>INTRODUCTION</b>       |   |                                                                                                                                                                                                                                                                                                             |                                                                                  |
| Rationale                 | 3 | Describe the rationale for the review in the context of what is already known.                                                                                                                                                                                                                              | See p.2,3                                                                        |
| Objectives                | 4 | Provide an explicit statement of questions being addressed with reference to participants, interventions, comparisons, outcomes, and study design (PICOS).                                                                                                                                                  | Not applicable as this is not a comparative study.<br>Research question on p. 5. |
| <b>METHODS</b>            |   |                                                                                                                                                                                                                                                                                                             |                                                                                  |
| Protocol and registration | 5 | Indicate if a review protocol exists, if and where it can be accessed (e.g., Web address), and, if available, provide registration information including registration number.                                                                                                                               | There is no published protocol for this study                                    |
| Eligibility criteria      | 6 | Specify study characteristics (e.g., PICOS, length of follow-up) and report characteristics (e.g., years considered, language, publication status) used as criteria for eligibility, giving rationale.                                                                                                      | Study characteristics described on p. 5                                          |
| Information sources       | 7 | Describe all information sources (e.g., databases with dates of coverage, contact with study authors to identify additional studies) in the search and date last searched.                                                                                                                                  | Information sources                                                              |



# PRISMA 2009 Checklist

|                                    |    |                                                                                                                                                                                                                        |                                            |
|------------------------------------|----|------------------------------------------------------------------------------------------------------------------------------------------------------------------------------------------------------------------------|--------------------------------------------|
|                                    |    |                                                                                                                                                                                                                        | described on p. 5.                         |
| Search                             | 8  | Present full electronic search strategy for at least one database, including any limits used, such that it could be repeated.                                                                                          | This is provided in Supplementary file 1   |
| Study selection                    | 9  | State the process for selecting studies (i.e., screening, eligibility, included in systematic review, and, if applicable, included in the meta-analysis).                                                              | Described on p. 6                          |
| Data collection process            | 10 | Describe method of data extraction from reports (e.g., piloted forms, independently, in duplicate) and any processes for obtaining and confirming data from investigators.                                             | Described on p. 7                          |
| Data items                         | 11 | List and define all variables for which data were sought (e.g., PICOS, funding sources) and any assumptions and simplifications made.                                                                                  | Described on p. 8 and Supplementary file 2 |
| Risk of bias in individual studies | 12 | Describe methods used for assessing risk of bias of individual studies (including specification of whether this was done at the study or outcome level), and how this information is to be used in any data synthesis. | N/A                                        |
| Summary measures                   | 13 | State the principal summary measures (e.g., risk ratio, difference in means).                                                                                                                                          | N/A                                        |
| Synthesis of results               | 14 | Describe the methods of handling data and combining results of studies, if done, including measures of consistency (e.g., $I^2$ ) for each meta-analysis.                                                              | N/A                                        |

Page 1 of 2

| Section/topic               | #  | Checklist item                                                                                                                               | Reported on page #                                                                                                        |
|-----------------------------|----|----------------------------------------------------------------------------------------------------------------------------------------------|---------------------------------------------------------------------------------------------------------------------------|
| Risk of bias across studies | 15 | Specify any assessment of risk of bias that may affect the cumulative evidence (e.g., publication bias, selective reporting within studies). | No formal risk of bias, but there is a lot of redundant publication. We have indicated potential unreliability of data on |

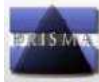

# PRISMA 2009 Checklist

|                               |    |                                                                                                                                                                                                          |                                                |
|-------------------------------|----|----------------------------------------------------------------------------------------------------------------------------------------------------------------------------------------------------------|------------------------------------------------|
|                               |    |                                                                                                                                                                                                          | p. 24.                                         |
| Additional analyses           | 16 | Describe methods of additional analyses (e.g., sensitivity or subgroup analyses, meta-regression), if done, indicating which were pre-specified.                                                         | N/A                                            |
| <b>RESULTS</b>                |    |                                                                                                                                                                                                          |                                                |
| Study selection               | 17 | Give numbers of studies screened, assessed for eligibility, and included in the review, with reasons for exclusions at each stage, ideally with a flow diagram.                                          | See p and Figure 1                             |
| Study characteristics         | 18 | For each study, present characteristics for which data were extracted (e.g., study size, PICOS, follow-up period) and provide the citations.                                                             | Data extraction items are listed in Appendix 2 |
| Risk of bias within studies   | 19 | Present data on risk of bias of each study and, if available, any outcome level assessment (see item 12).                                                                                                | N/A                                            |
| Results of individual studies | 20 | For all outcomes considered (benefits or harms), present, for each study: (a) simple summary data for each intervention group (b) effect estimates and confidence intervals, ideally with a forest plot. | N/A as no intervention groups                  |
| Synthesis of results          | 21 | Present results of each meta-analysis done, including confidence intervals and measures of consistency.                                                                                                  | N/A                                            |
| Risk of bias across studies   | 22 | Present results of any assessment of risk of bias across studies (see Item 15).                                                                                                                          | N/A                                            |
| Additional analysis           | 23 | Give results of additional analyses, if done (e.g., sensitivity or subgroup analyses, meta-regression [see Item 16]).                                                                                    | Descriptive analyses only                      |
| <b>DISCUSSION</b>             |    |                                                                                                                                                                                                          |                                                |
| Summary of evidence           | 24 | Summarize the main findings including the strength of evidence for each main outcome; consider their relevance to key groups (e.g., healthcare providers, users, and policy makers).                     | Strength of evidence not applicable            |
| Limitations                   | 25 | Discuss limitations at study and outcome level (e.g., risk of bias), and at review-level (e.g., incomplete retrieval of identified research, reporting bias).                                            | See p. 24.                                     |
| Conclusions                   | 26 | Provide a general interpretation of the results in the context of other evidence, and implications for future research.                                                                                  | See pp. 21-4                                   |
| <b>FUNDING</b>                |    |                                                                                                                                                                                                          |                                                |

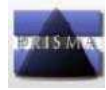

# PRISMA 2009 Checklist

1  
2  
3  
4  
5  
6  
7  
8  
9  
10  
11  
12  
13  
14  
15  
16  
17  
18  
19  
20  
21  
22  
23  
24  
25  
26  
27  
28  
29  
30  
31  
32  
33  
34  
35  
36  
37  
38  
39  
40  
41  
42  
43  
44  
45  
46  
47

|         |    |                                                                                                                                            |                                       |
|---------|----|--------------------------------------------------------------------------------------------------------------------------------------------|---------------------------------------|
| Funding | 27 | Describe sources of funding for the systematic review and other support (e.g., supply of data); role of funders for the systematic review. | There was no funding for this review. |
|---------|----|--------------------------------------------------------------------------------------------------------------------------------------------|---------------------------------------|

From: Moher D, Liberati A, Tetzlaff J, Altman DG, The PRISMA Group (2009). Preferred Reporting Items for Systematic Reviews and Meta-Analyses: The PRISMA Statement. PLoS Med 6(7): e1000097. doi:10.1371/journal.pmed1000097

For more information, visit: [www.prisma-statement.org](http://www.prisma-statement.org).

For peer review only
