# Supplementary material for: Compliance with ethical standards in the reporting of donor sources and ethics review in peer-reviewed publications involving organ transplantation in China: a scoping review
Source: PubMed Central journal article supplement — BMJ Open. 2019 Feb 5;9(2):e024473. doi: 10.1136/bmjopen-2018-024473 (PMC6377532; doi:10.1136/bmjopen-2018-024473), 2019-02-05
Supplement: bmjopen-2018-024473supp001.pdf [file bmjopen-2018-024473supp001.pdf]

## Supplementary File1: Search strategies

All searches run on 5 April 2017

| <b>Medline*</b>                                                                                                                                                                                                                                                                                                                                                                                                                                   |                                                                  | <b>Results<br/>:<br/>1702</b> |
|---------------------------------------------------------------------------------------------------------------------------------------------------------------------------------------------------------------------------------------------------------------------------------------------------------------------------------------------------------------------------------------------------------------------------------------------------|------------------------------------------------------------------|-------------------------------|
| 1                                                                                                                                                                                                                                                                                                                                                                                                                                                 | exp Organ Transplantation/                                       |                               |
| 2                                                                                                                                                                                                                                                                                                                                                                                                                                                 | transplant*.ti,ab.                                               |                               |
| 3                                                                                                                                                                                                                                                                                                                                                                                                                                                 | 1 and 2                                                          |                               |
| 4                                                                                                                                                                                                                                                                                                                                                                                                                                                 | China.in.                                                        |                               |
| 5                                                                                                                                                                                                                                                                                                                                                                                                                                                 | 3 and 4                                                          |                               |
| 6                                                                                                                                                                                                                                                                                                                                                                                                                                                 | stem cells.ti,ab.                                                |                               |
| 7                                                                                                                                                                                                                                                                                                                                                                                                                                                 | mice.ti,ab.                                                      |                               |
| 8                                                                                                                                                                                                                                                                                                                                                                                                                                                 | Living Donors/                                                   |                               |
| 9                                                                                                                                                                                                                                                                                                                                                                                                                                                 | living donor.ti,ab.                                              |                               |
| 10                                                                                                                                                                                                                                                                                                                                                                                                                                                | Case Reports/                                                    |                               |
| 11                                                                                                                                                                                                                                                                                                                                                                                                                                                | or/6-10                                                          |                               |
| 12                                                                                                                                                                                                                                                                                                                                                                                                                                                | 5 not 11                                                         |                               |
| 13                                                                                                                                                                                                                                                                                                                                                                                                                                                | limit 12 to (English language and humans and yr="2000 -Current") |                               |
| <b>Timespan:</b> 2000-2017 (5 April)                                                                                                                                                                                                                                                                                                                                                                                                              |                                                                  |                               |
| <b>SCOPUS</b>                                                                                                                                                                                                                                                                                                                                                                                                                                     |                                                                  | <b>Results<br/>:<br/>2050</b> |
| <p><i>(( TITLE ( transplant* ) AND AFFILCOUNTRY ( china ) AND NOT TITLE-ABS-KEY ( mice OR "stem cell" OR "living donor" OR "case report" )) AND PUBYEAR &gt; 1999 ) AND ( EXCLUDE ( DOCTYPE , "cp " ) OR EXCLUDE ( DOCTYPE , "le " ) OR EXCLUDE ( DOCTYPE , "ed " )) AND ( LIMIT-TO ( LANGUAGE , "English " ) AND ( LIMIT-TO ( EXACTKEYWORD , "Human " ) OR LIMIT-TO ( EXACTKEYWORD , "Male " ) OR LIMIT-TO ( EXACTKEYWORD , "Female " ))</i></p> |                                                                  |                               |
| <b>Embase</b>                                                                                                                                                                                                                                                                                                                                                                                                                                     |                                                                  | <b>Results<br/>:<br/>2971</b> |
| 1                                                                                                                                                                                                                                                                                                                                                                                                                                                 | exp organ transplantation/                                       |                               |
| 2                                                                                                                                                                                                                                                                                                                                                                                                                                                 | china.in.                                                        |                               |
| 3                                                                                                                                                                                                                                                                                                                                                                                                                                                 | 1 and 2                                                          |                               |
| 4                                                                                                                                                                                                                                                                                                                                                                                                                                                 | stem cells.ti,ab.                                                |                               |
| 5                                                                                                                                                                                                                                                                                                                                                                                                                                                 | mice.ti,ab.                                                      |                               |
| 6                                                                                                                                                                                                                                                                                                                                                                                                                                                 | practice guideline/                                              |                               |
| 7                                                                                                                                                                                                                                                                                                                                                                                                                                                 | *"living donor"/                                                 |                               |
| 8                                                                                                                                                                                                                                                                                                                                                                                                                                                 | living donor.ti,ab.                                              |                               |
| 9                                                                                                                                                                                                                                                                                                                                                                                                                                                 | or/4-8                                                           |                               |
| 10                                                                                                                                                                                                                                                                                                                                                                                                                                                | 3 not 9                                                          |                               |
| 11                                                                                                                                                                                                                                                                                                                                                                                                                                                | limit 10 to (human and English language and yr="2000 -Current")  |                               |

|    |                                                                 |  |  |
|----|-----------------------------------------------------------------|--|--|
| 12 | limit 11 to article                                             |  |  |
| 13 | transplant*.ti,ab.                                              |  |  |
| 14 | 1 and 13                                                        |  |  |
| 15 | 2 and 14                                                        |  |  |
| 16 | 15 not 9                                                        |  |  |
| 17 | limit 16 to (human and English language and yr="2000 -Current") |  |  |
| 18 | limit 17 to article                                             |  |  |
| 19 | case report/                                                    |  |  |
| 20 | 18 not 19                                                       |  |  |

**Timespan:** 2000-2017 (5 April).  
Search language=Auto
