# Supplementary material for: Compliance with ethical standards in the reporting of donor sources and ethics review in peer-reviewed publications involving organ transplantation in China: a scoping review
Source: PubMed Central journal article supplement — BMJ Open. 2019 Feb 5;9(2):e024473. doi: 10.1136/bmjopen-2018-024473 (PMC6377532; doi:10.1136/bmjopen-2018-024473), 2019-02-05
Supplement: bmjopen-2018-024473supp002.pdf [file bmjopen-2018-024473supp002.pdf]

## Supplementary File 2: Details extracted from included studies

| Column ID | Descriptor                                                                                                                                                                                                                                                                                                                                                                                                                       |
|-----------|----------------------------------------------------------------------------------------------------------------------------------------------------------------------------------------------------------------------------------------------------------------------------------------------------------------------------------------------------------------------------------------------------------------------------------|
| A         | EndNote reference number                                                                                                                                                                                                                                                                                                                                                                                                         |
| B         | Title and abstract                                                                                                                                                                                                                                                                                                                                                                                                               |
| C         | Journal title                                                                                                                                                                                                                                                                                                                                                                                                                    |
| D         | url                                                                                                                                                                                                                                                                                                                                                                                                                              |
| E         | 0: Exclude<br>1: Include<br>2: Paper not available<br>3: For discussion                                                                                                                                                                                                                                                                                                                                                          |
| F         | Exclusion reason (see Table 2 for more details)                                                                                                                                                                                                                                                                                                                                                                                  |
| G         | Publication year                                                                                                                                                                                                                                                                                                                                                                                                                 |
| H         | Organ type: 1=hearts; 2=livers; 3=lungs; 4=other(combined)                                                                                                                                                                                                                                                                                                                                                                       |
| I         | Are organ sources (donors) clearly identified as deceased?<br>DD=deceased donors.                                                                                                                                                                                                                                                                                                                                                |
| J         | Number of recipients with deceased or unknown source of transplants reported in research                                                                                                                                                                                                                                                                                                                                         |
| K         | Year/month in which first transplants took place                                                                                                                                                                                                                                                                                                                                                                                 |
| L         | Year/month in which final transplants took place                                                                                                                                                                                                                                                                                                                                                                                 |
| M         | Presence (=1) or absence (=0) of Institutional Review Board (Research Ethics Committee) approval for the research                                                                                                                                                                                                                                                                                                                |
| N         | Copy of text reporting ethics approval, if present                                                                                                                                                                                                                                                                                                                                                                               |
| O         | Information on identity of organ sources:<br>0 = No statement about identity of organ sources<br>1 = Explicit statement that organs came from volunteers or that no prisoners' organs were used<br>2 = Explicit statement that organs came from prisoners<br>3 = Sources mixed (i.e., prisoner and volunteer)<br>4 = Other (make note in column R)                                                                               |
| P         | Copy of text reporting identity of sources, if present. This included any papers in which there was some statement that organs did not come from executed prisoners, or came from volunteers, or source gave consent etc.                                                                                                                                                                                                        |
| Q         | Type of donation:<br>0 = No information<br>DBD = Donation after brain death – (death certified on neurological criteria)<br>DCD = Donation after cardiac death – or non-heart beating (death declared on circulatory criteria)<br>CDCD = China donation after citizen death - (a new China specific descriptor which denotes death declared on both neurological and circulatory criteria)<br>OT = Other (make note in column R) |
| R         | Comments                                                                                                                                                                                                                                                                                                                                                                                                                         |
| S         | Initials of author doing data extraction for this paper                                                                                                                                                                                                                                                                                                                                                                          |
| T         | Initials of author if this entry was checked                                                                                                                                                                                                                                                                                                                                                                                     |
| U         | Institution where transplants took place                                                                                                                                                                                                                                                                                                                                                                                         |

For the Results Table in Supplementary File 4, we have omitted the administrative data e.g EndNote reference numbers, initials of authors doing extractions and checks), the data relating to exclusions (as we are not reporting on these), and the institution where the transplants took place (because this was inconsistently reported by data extractors and was not relevant to the research questions). As a result, the final columns in the Results table are:

| Column ID | Descriptor                                                                                                                                                                                                                                                                                                                                                                                               |
|-----------|----------------------------------------------------------------------------------------------------------------------------------------------------------------------------------------------------------------------------------------------------------------------------------------------------------------------------------------------------------------------------------------------------------|
| A         | Title and abstract                                                                                                                                                                                                                                                                                                                                                                                       |
| B         | Journal title                                                                                                                                                                                                                                                                                                                                                                                            |
| C         | Publication year                                                                                                                                                                                                                                                                                                                                                                                         |
| D         | Organ type                                                                                                                                                                                                                                                                                                                                                                                               |
| E         | Are organ sources (donors) clearly identified as deceased?<br>DD=deceased donors.                                                                                                                                                                                                                                                                                                                        |
| F         | Number of recipients with deceased or unknown source of transplants reported in research                                                                                                                                                                                                                                                                                                                 |
| G         | Year/month in which first transplants took place                                                                                                                                                                                                                                                                                                                                                         |
| H         | Year/month in which final transplants took place                                                                                                                                                                                                                                                                                                                                                         |
| I         | Institutional Review Board (Research Ethics Committee) approval for the research                                                                                                                                                                                                                                                                                                                         |
| J         | Copy of text reporting ethics approval, if present                                                                                                                                                                                                                                                                                                                                                       |
| K         | Information on identity of organ sources:<br>0 = No statement about identity of organ sources<br>1 = Explicit statement that organs came from volunteers or that no prisoners' organs were used<br>2 = Explicit statement that organs came from prisoners<br>3 = Sources mixed (i.e., prisoner and volunteer)<br>4 = Other                                                                               |
| L         | Copy of text reporting identity of sources, if present. This included any papers in which there was some statement that organs did not come from executed prisoners, or came from volunteers, or source gave consent etc.                                                                                                                                                                                |
| M         | Presence (=1) or absence (=0) of                                                                                                                                                                                                                                                                                                                                                                         |
| N         | Type of donation:<br>0 = No information<br>DBD = Donation after brain death – (death certified on neurological criteria)<br>DCD = Donation after cardiac death – or non-heart beating (death declared on circulatory criteria)<br>CDCD = China donation after citizen death - (a new China specific descriptor which denotes death declared on both neurological and circulatory criteria)<br>OT = Other |
