# Supplementary material for: Compliance with ethical standards in the reporting of donor sources and ethics review in peer-reviewed publications involving organ transplantation in China: a scoping review
Source: PubMed Central journal article supplement — BMJ Open. 2019 Feb 5;9(2):e024473. doi: 10.1136/bmjopen-2018-024473 (PMC6377532; doi:10.1136/bmjopen-2018-024473), 2019-02-05
Supplement: bmjopen-2018-024473supp005.pdf [file bmjopen-2018-024473supp005.pdf]

**Supplementary File 5: Bibliographic details of 63 studies containing some information regarding identity of and/or consent by organ sources/donors.**

**Note: these 63 studies are a subset of the 445 papers reported in the study and their details are also included in Supplementary file 3.**

1. Chen J, Wang Y, Shen Z, et al. Early diagnostic value of plasma PCT and BG assay for CRBSI after OLT. *Transplant Proc* 2011;43(5):1777-79 Online First.
2. Chen Y, Zhang H, Xiao X, et al. Peripheral blood transcriptome sequencing reveals rejection-relevant genes in long-term heart transplantation. *Int J Cardiol* 2013;168(3):2726-33 doi: 10.1016/j.ijcard.2013.03.095published Online First.
3. Chen YB, Li SD, Ju BL, et al. Suitable calcineurin inhibitor concentrations for liver transplant recipients in the Chinese population. *Transplant Proc* 2011;43(5):1751-53 doi: 10.1016/j.transproceed.2010.11.025published Online First.
4. Chen Z, Gong R, Luo Y, et al. Surgical procedures for hepatolithiasis. *Hepatogastroenterology* 2010;57(97):134-7 Online First.
5. Chen ZY, Yan LN, Zeng Y, et al. Preliminary experience with indications for liver transplantation for hepatolithiasis. *Transplant Proc* 2008;40(10):3517-22 doi: 10.1016/j.transproceed.2008.07.142published Online First.
6. Chu Z, Zhang J, Zhao Y, et al. Influence of immunosuppressive drugs on the development of CD4 +CD25high Foxp3+ T cells in liver transplant recipients. *Transplant Proc* 2010;42(7):2599-601 doi: 10.1016/j.transproceed.2010.04.026published Online First.
7. Fan J, Yang GS, Fu ZR, et al. Liver transplantation outcomes in 1,078 hepatocellular carcinoma patients: A multi-center experience in Shanghai, China. *J Cancer Res Clin Oncol* 2009;135(10):1403-12 doi: 10.1007/s00432-009-0584-6published Online First.
8. Fan X, Chen Z, Nasralla D, et al. The organ preservation and enhancement of donation success ratio effect of extracorporeal membrane oxygenation in circulatory unstable brain death donor. *Clin Transplant* 2016;30(10):1306-13 Online First.
9. Gao Y, Ren H, Meng F, et al. Pathological roles of interleukin-22 in the development of recurrent hepatitis C after liver transplantation. *PLoS One* 2016;11(4) doi: 10.1371/journal.pone.0154419published Online First.
10. Gao Y, Zhang M, Li J, et al. Circulating FoxP3+ regulatory T and interleukin17-producing Th17 cells actively influence HBV clearance in De Novo Hepatitis B virus infected patients after orthotopic liver transplantation. *PLoS One* 2015;10(9) doi: 10.1371/journal.pone.0137881published Online First.

11. Gao YJ, Zhang M, Jin B, et al. A clinical-pathological analysis of hepatitis B virus recurrence after liver transplantation in Chinese patients. *Journal of Gastroenterology and Hepatology (Australia)* 2014;29(3):554-60 doi: 10.1111/jgh.12404published Online First.
12. Gu L, Yu YC. Clinical outcome of dental implants placed in liver transplant recipients after 3 years: A case series. *Transplant Proc* 2011;43(7):2678-82 doi: 10.1016/j.transproceed.2011.06.037published Online First.
13. Gu Y, Li J, Li N. Insulin sensitivity after pancreaticoduodenal transplantation with systemic and portal venous drainage in inbred rats. *Chin Med J* 2002;115(4):549-51 Online First.
14. Hu XX, Yan LN. Retrospective analysis of prognostic factors after liver transplantation for intrahepatic cholangiocarcinoma in China: A single-center experience. *Hepatogastroenterology* 2011;58(109):1255-59 doi: 10.5754/hge10704published Online First.
15. Jiang L, Lei JY, Wang WT, et al. Immediate radical therapy or conservative treatments when meeting the Milan criteria for advanced HCC patients after successful TACE. *J Gastrointest Surg* 2014;18(6):1125-30 Online First.
16. Lei J, Yan L. Outcome comparisons among the Hangzhou, Chengdu, and UCSF criteria for hepatocellular carcinoma liver transplantation after successful downstaging therapies. *J Gastrointest Surg* 2013;17(6):1116-22 doi: 10.1007/s11605-013-2140-6published Online First.
17. Lei JY, Wang WT, Yan LN. Hangzhou criteria for liver transplantation in hepatocellular carcinoma: A single-center experience. *Eur J Gastroenterol Hepatol* 2014;26(2):200-04 doi: 10.1097/MEG.0b013e3283652b66published Online First.
18. Lei JY, Yan LN, Wang WT, et al. Health-related quality of life and psychological distress in patients with early-stage hepatocellular carcinoma after hepatic resection or transplantation. *Transplant Proc* 2016;48(6):2107-11 Online First.
19. Li F, Yang M, Li B, et al. Initial clinical results of orthotopic liver transplantation for hepatic alveolar echinococcosis. *Liver Transpl* 2007;13(6):924-26 doi: 10.1002/lt.21187published Online First.
20. Li H, He JW, Fu BS, et al. Immunosuppressant-related hip pain after orthotopic liver transplant. *Exp Clin Transplant* 2013;11(1):32-38 doi: 10.6002/ect.2012.0026published Online First.
21. Li H, Li J, Wang Y, et al. Proteomic analysis of effluents from perfused human heart for transplantation: Identification of potential biomarkers for ischemic heart damage. *Proteome Science* 2012;10(1) doi: 10.1186/1477-5956-10-21published Online First.
22. Li J, Liu B, Yan LN, et al. Reversal of graft steatosis after liver transplantation: prospective study. *Transplant Proc* 2009;41(9):3560-63 doi: 10.1016/j.transproceed.2009.06.222published Online First.

23. Li WX, Li Z, Gao PJ, et al. Histological differentiation predicts post-liver transplantation survival time. *Clinics and Research in Hepatology and Gastroenterology* 2014;38(2):201-08 doi: 10.1016/j.clinre.2013.11.002published Online First.
24. Lin B, Geng L, Zheng Z, et al. The predictive value of blood neutrophil-lymphocyte ratio in patients with end-stage liver cirrhosis following ABO-incompatible liver transplantation. *J Res Med Sci* 2016;21(5):20-25 Online First.
25. Lin XH, Teng S, Wang L, et al. Fatigue and its associated factors in liver transplant recipients in Beijing: A cross-sectional study. *BMJ Open* 2017;7 (2) Online First.
26. Ling Q, Xie H, Li J, et al. Donor graft microRNAs: A newly identified player in the development of new-onset diabetes after liver transplantation. *Am J Transplant* 2017;17(1):255-64 Online First.
27. Ling Q, Xie H, Lu D, et al. Association between donor and recipient TCF7L2 gene polymorphisms and the risk of new-onset diabetes mellitus after liver transplantation in a Han Chinese population. *J Hepatol* 2013;58(2):271-77 doi: 10.1016/j.jhep.2012.09.025published Online First.
28. Ling Q, Xu X, Wang K, et al. Donor PPAR $\gamma$  Gene polymorphisms influence the susceptibility to glucose and lipid disorders in liver transplant recipients. *Medicine (United States)* 2015;94(35):e1421 doi: 10.1097/MD.0000000000001421published Online First.
29. Liu C, Tsai HL, Chin T, et al. Experience of surgical treatment for hepatoblastoma. *Formosan Journal of Surgery* 2016;49(2):56-62 Online First.
30. Liu S, Bai Y, Huang J, et al. Do mitochondria contribute to left ventricular non-compaction cardiomyopathy? New findings from myocardium of patients with left ventricular non-compaction cardiomyopathy. *Mol Genet Metab* 2013;109(1):100-06 Online First.
31. Liu X, Wang B, Zhang X, et al. Liver transplantation using donation after brain and cardiac death: A single-center experience in China. *Transplant Proc* 2016;48(6):1879-86 Online First.
32. Liu Y, Liu YY, Li CP, et al. Comprehensive comparison of three different immunosuppressive regimens for liver transplant patients with hepatocellular carcinoma: Steroid-free immunosuppression, induction immunosuppression and standard immunosuppression. *PLoS One* 2015;10 (3) Online First.
33. Lu D, Xu X, Wang J, et al. The influence of a contemporaneous portal and hepatic artery revascularization protocol on biliary complications after liver transplantation. *Surgery (United States)* 2014;155(1):190-95 doi: 10.1016/j.surg.2013.06.056published Online First.

34. Mu HJ, Xie P, Chen JY, et al. Association of TNF- $\alpha$ , TGF- $\beta$ 1, IL-10, IL-6, and IFN- $\gamma$  gene polymorphism with acute rejection and infection in lung transplant recipients. *Clin Transplant* 2014;28(9):1016-24 doi: 10.1111/ctr.12411 published Online First.
35. Pan C, Shi Y, Zhang JJ, et al. Single-Center experience of 253 portal vein thrombosis patients undergoing liver transplantation in China. *Transplant Proc* 2009;41(9):3761-65 doi: 10.1016/j.transproceed.2009.06.215 published Online First.
36. Ran JH, Zhang SN, Liu J, et al. In-hospital and follow-up outcomes of patients undergoing orthotopic liver transplantation after hepatic artery reconstruction with an iliac interposition graft. *Int J Clin Exp Med* 2016;9(2):3939-45 Online First.
37. Sun XY, Dong JH, Qin K, et al. Single center study on transplantation of livers donated after cardiac death: A report of 6 cases. *Exp Ther Med* 2016;11(3):988-92 doi: 10.3892/etm.2016.3001 published Online First.
38. Wang SY, Tang HM, Chen GQ, et al. Effect of ursodeoxycholic acid administration after liver transplantation on serum liver tests and biliary complications: A randomized clinical trial. *Digestion* 2012;86(3):208-17 doi: 10.1159/000339711 published Online First.
39. Wang Y, Liu Y, Han R, et al. Monitoring of CD95 and CD38 expression in peripheral blood T lymphocytes during active human cytomegalovirus infection after orthotopic liver transplantation. *Journal of Gastroenterology and Hepatology (Australia)* 2010;25(1):138-42 doi: 10.1111/j.1440-1746.2009.05966.x published Online First.
40. Wang Y, Shen Z, Zhu Z, et al. Clinical values of AFP, GPC3 mRNA in peripheral blood for prediction of hepatocellular carcinoma recurrence following OLT. *Hepatitis Monthly* 2011;11(3):195-99 Online First.
41. Xiao L, Fu ZR, Ding GS, et al. Prediction of survival after liver transplantation for chronic severe hepatitis b based on preoperative prognostic scores: A single center's experience in China. *World J Surg* 2009;33(11):2420-26 doi: 10.1007/s00268-009-0183-3 published Online First.
42. Xu J, Shen ZY, Chen XG, et al. A randomized controlled trial of licartin for preventing hepatoma recurrence after liver transplantation. *Hepatology* 2007;45(2):269-76 doi: 10.1002/hep.21465 published Online First.
43. Xu X, Guo HJ, Xie HY, et al. ZIP4, a novel determinant of tumor invasion in hepatocellular carcinoma, contributes to tumor recurrence after liver transplantation. *Int J Biol Sci* 2014;10(3):245-56 doi: 10.7150/ijbs.7401 published Online First.
44. Xu X, Ling Q, Gao F, et al. Hepatoprotective effects of marine and kuhuang in liver transplant recipients. *Am J Chin Med* 2009;37(1):27-34 Online First.

45. Xu X, Ling Q, Wang J, et al. Donor miR-196a-2 polymorphism is associated with hepatocellular carcinoma recurrence after liver transplantation in a Han Chinese population. *Int J Cancer* 2016;138(3):620-29 Online First.
46. Xu X, Ling Q, Zhang M, et al. Outcome of patients with hepatorenal syndrome type 1 after liver transplantation: Hangzhou experience. *Transplantation* 2009;87(10):1514-19 doi: 10.1097/TP.0b013e3181a4430b published Online First.
47. Xu X, Liu X, Ling Q, et al. Artificial liver support system combined with liver transplantation in the treatment of patients with acute-on-chronic liver failure. *PLoS One* 2013;8(3) doi: 10.1371/journal.pone.0058738 published Online First.
48. Xu X, Tu Z, Wang B, et al. A novel model for evaluating the risk of hepatitis B recurrence after liver transplantation. *Liver International* 2011;31(10):1477-84 doi: 10.1111/j.1478-3231.2011.02500.x published Online First.
49. Xue F, Higgs BW, Huang J, et al. HERC5 is a prognostic biomarker for post-liver transplant recurrent human hepatocellular carcinoma. *J Transl Med* 2015;13(1) doi: 10.1186/s12967-015-0743-2 published Online First.
50. Yan L, Li B, Wen T, et al. Prophylaxis Against hepatitis B recurrence posttransplantation using lamivudine and individualized low-dose hepatitis B immunoglobulin. *Am J Transplant* 2010;10(8):1861-69 Online First.
51. Yang X, Lu Q, Tang T, et al. Prediction of the prognosis after liver transplantation in severe hepatitis B-induced liver failure and clinical decision for liver transplantation. *J Surg Res* 2013;183(2):846-51 doi: 10.1016/j.jss.2013.01.034 published Online First.
52. Yu S, Yu J, Zhang W, et al. Safe use of liver grafts from hepatitis B surface antigen positive donors in liver transplantation. *J Hepatol* 2014;61(4):809-15 Online First.
53. Yu Z, Sun Z, Yu S, et al. Safety limitations of fatty liver transplantation can be extended to 40%: Experience of a single centre in China. *Liver International* 2016 Online First.
54. Yuan X, Chen C, Zhou J, et al. Organ donation and transplantation from donors with systemic infection: A single-center experience. *Transplant Proc* 2016;48(7):2454-57 Online First.
55. Yuefeng M, Weili F, Wenxiang T, et al. Long-term outcome of patients with lamivudine after early cessation of hepatitis B immunoglobulin for prevention of recurrent hepatitis B following liver transplantation. *Clin Transplant* 2011;25(4):517-22 Online First.
56. Zhang D, Jiao Z, Han J, et al. Clinicopathological features of hepatitis B virus recurrence after liver transplantation: Eleven-year experience. *Int J Clin Exp Pathol* 2014;7(7):4057-66 Online First.

57. Zhang M, Yin F, Chen B, et al. Mortality risk after liver transplantation in hepatocellular carcinoma recipients: A nonlinear predictive model. *Surgery (United States)* 2012;151(6):889-97 doi: 10.1016/j.surg.2011.12.034published Online First.
58. Zhang M, Yin F, Chen B, et al. Pretransplant prediction of posttransplant survival for liver recipients with benign end-stage liver diseases: A nonlinear model. *PLoS One* 2012;7 (3) Online First.
59. Zhang Y, Yan L, Wen T, et al. Prophylaxis against hepatitis B virus recurrence after liver transplantation for hepatitis B virus-related end-stage liver diseases with severe hypersplenism and splenomegaly: Role of splenectomy. *J Surg Res* 2012;178(1):478-86 doi: 10.1016/j.jss.2012.02.047published Online First.
60. Zhong L, Li H, Li Z, et al. C7 genotype of the donor may predict early bacterial infection after liver transplantation. *Sci Rep* 2016;6:24121 Online First.
61. Zhu M, Li Y, Xia Q, et al. Strong impact of acute kidney injury on survival after liver transplantation. *Transplant Proc* 2010;42(9):3634-38 doi: 10.1016/j.transproceed.2010.08.059published Online First.
62. Zhu XS, Gao YH, Wang SS, et al. Contrast-enhanced ultrasound diagnosis of splenic artery steal syndrome after orthotopic liver transplantation. *Liver Transpl* 2012;18(8):966-71 doi: 10.1002/lt.23453published Online First.
63. Zhu XS, Wang SS, Cheng Q, et al. Using ultrasonography to monitor liver blood flow for liver transplant from donors supported on extracorporeal membrane oxygenation. *Liver Transpl* 2016;22(2):188-91 doi: 10.1002/lt.24318published Online First.
