# Supplementary material for: Compliance with ethical standards in the reporting of donor sources and ethics review in peer-reviewed publications involving organ transplantation in China: a scoping review
Source: PubMed Central journal article supplement — BMJ Open. 2019 Feb 5;9(2):e024473. doi: 10.1136/bmjopen-2018-024473 (PMC6377532; doi:10.1136/bmjopen-2018-024473), 2019-02-05
Supplement: bmjopen-2018-024473supp006.pdf [file bmjopen-2018-024473supp006.pdf]

**Supplementary File 6: Full list of journals included in the study and number of papers per journal**

| Journal                                                     | Number |
|-------------------------------------------------------------|--------|
| Transplantation Proceedings                                 | 65     |
| PLoS ONE                                                    | 20     |
| Clinical Transplantation                                    | 16     |
| Liver Transplantation                                       | 15     |
| Hepato-Gastroenterology                                     | 14     |
| Experimental and Clinical Transplantation                   | 11     |
| Clinics and Research in Hepatology and Gastroenterology     | 8      |
| International Journal of Clinical and Experimental Medicine | 8      |
| Annals of Transplantation                                   | 7      |
| International Journal of Clinical Practice                  | 6      |
| Journal of Cancer Research and Clinical Oncology            | 6      |
| Transplantation                                             | 6      |
| European Journal of Gastroenterology and Hepatology         | 5      |
| Experimental and Therapeutic Medicine                       | 5      |
| Medical Oncology                                            | 5      |
| Medicine (United States)                                    | 5      |
| Surgery (United States)                                     | 5      |

|                                                        |   |
|--------------------------------------------------------|---|
| BMC Cancer                                             | 4 |
| European Journal of Clinical Pharmacology              | 4 |
| Genetics and Molecular Research                        | 4 |
| Hepatology International                               | 4 |
| Journal of Gastrointestinal Surgery                    | 4 |
| Journal of International Medical Research              | 4 |
| Liver International                                    | 4 |
| Oncotarget                                             | 4 |
| Therapeutic Drug Monitoring                            | 4 |
| Biomarkers                                             | 3 |
| Cytokine                                               | 3 |
| Gene                                                   | 3 |
| International Journal of Medical Sciences              | 3 |
| Journal of Gastroenterology and Hepatology (Australia) | 3 |
| Journal of Hepatology                                  | 3 |
| Journal of Surgical Research                           | 3 |
| Scientific Reports                                     | 3 |
| Transplant Infectious Disease                          | 3 |
| World Journal of Surgery                               | 3 |

|                                                      |   |
|------------------------------------------------------|---|
| Abdominal Imaging                                    | 2 |
| American Journal of Transplantation                  | 2 |
| Annals of Surgical Oncology                          | 2 |
| Archives of Medical Research                         | 2 |
| Asian Pacific Journal of Cancer Prevention           | 2 |
| BioMed Research International                        | 2 |
| BMC Infectious Diseases                              | 2 |
| Brazilian Journal of Medical and Biological Research | 2 |
| British Journal of Radiology                         | 2 |
| Cancer Letters                                       | 2 |
| Clinical Chemistry and Laboratory Medicine           | 2 |
| Clinical Imaging                                     | 2 |
| Digestion                                            | 2 |
| Digestive Diseases and Sciences                      | 2 |
| European Journal of Radiology                        | 2 |
| European Surgical Research                           | 2 |
| Hepatitis Monthly                                    | 2 |
| Hepatology                                           | 2 |
| Hepatology Research                                  | 2 |

|                                                                 |   |
|-----------------------------------------------------------------|---|
| Immunopharmacology and Immunotoxicology                         | 2 |
| International Journal of Clinical Pharmacology and Therapeutics | 2 |
| Journal of Cardiothoracic Surgery                               | 2 |
| Journal of Immunology Research                                  | 2 |
| Journal of Surgical Oncology                                    | 2 |
| Latin American Journal of Pharmacy                              | 2 |
| Medical Science Monitor                                         | 2 |
| Microbial Ecology                                               | 2 |
| OncoTargets and Therapy                                         | 2 |
| Pharmacogenomics                                                | 2 |
| Postgraduate Medical Journal                                    | 2 |
| Surgery Today                                                   | 2 |
| Therapeutics and Clinical Risk Management                       | 2 |
| Transplant Immunology                                           | 2 |
| Tumor Biology                                                   | 2 |
| World Journal of Surgical Oncology                              | 2 |
| Acta Anaesthesiologica Scandinavica                             | 1 |
| Acta Cardiologica                                               | 1 |
| Alcohol                                                         | 1 |

|                                                     |   |
|-----------------------------------------------------|---|
| American Journal of Chinese Medicine                | 1 |
| American Journal of Roentgenology                   | 1 |
| Annals of Hepatology                                | 1 |
| ASAIO Journal                                       | 1 |
| Asian Journal of Andrology                          | 1 |
| Biochemical and Biophysical Research Communications | 1 |
| Biomedicine and Pharmacotherapy                     | 1 |
| BMC Gastroenterology                                | 1 |
| BMC neurology                                       | 1 |
| BMJ Open                                            | 1 |
| Brain Imaging and Behavior                          | 1 |
| Brain Research                                      | 1 |
| Cancer Biology & Therapy                            | 1 |
| Cancer Biology and Therapy                          | 1 |
| Cancer Gene Therapy                                 | 1 |
| CardioVascular and Interventional Radiology         | 1 |
| Cell Biochemistry and Biophysics                    | 1 |
| Clinica Chimica Acta                                | 1 |
| Clinical and Developmental Immunology               | 1 |

|                                                          |   |
|----------------------------------------------------------|---|
| Clinical and Experimental Metastasis                     | 1 |
| Clinical Cancer Research                                 | 1 |
| Clinical Genetics                                        | 1 |
| Clinical Laboratory                                      | 1 |
| Clinical Pharmacokinetics                                | 1 |
| Clinical Therapeutics                                    | 1 |
| Clinical transplants                                     | 1 |
| Cytotherapy                                              | 1 |
| Diagnostic Pathology                                     | 1 |
| Digestive and Liver Disease                              | 1 |
| Digestive Surgery                                        | 1 |
| Disease Markers                                          | 1 |
| Drug Metabolism and Pharmacokinetics                     | 1 |
| European Journal of Medical Research                     | 1 |
| European Journal of Pharmaceutical Sciences              | 1 |
| European Review for Medical and Pharmacological Sciences | 1 |
| Focus on Alternative and Complementary Therapies         | 1 |
| Formosan Journal of Surgery                              | 1 |
| Gut and Liver                                            | 1 |

|                                                              |   |
|--------------------------------------------------------------|---|
| Human Vaccines and Immunotherapeutics                        | 1 |
| Interactive Cardiovascular and Thoracic Surgery              | 1 |
| International Anesthesiology Clinics                         | 1 |
| International Immunopharmacology                             | 1 |
| International Journal of Biological Sciences                 | 1 |
| International Journal of Cancer                              | 1 |
| International Journal of Cardiology                          | 1 |
| International Journal of Clinical & Experimental Pathology   | 1 |
| International Journal of Clinical and Experimental Pathology | 1 |
| International Journal of Clinical Oncology                   | 1 |
| International Journal of Hyperthermia                        | 1 |
| International Journal of Immunogenetics                      | 1 |
| Investigational New Drugs                                    | 1 |
| Journal of Cardiovascular Surgery                            | 1 |
| Journal of Clinical Nursing                                  | 1 |
| Journal of Clinical Pharmacology                             | 1 |
| Journal of Clinical Pharmacy and Therapeutics                | 1 |
| Journal of Clinical Virology                                 | 1 |
| Journal of Critical Care                                     | 1 |

|                                                    |   |
|----------------------------------------------------|---|
| Journal of Diabetes Investigation                  | 1 |
| Journal of Diabetes.                               | 1 |
| Journal of Gastrointestinal and Liver Diseases     | 1 |
| Journal of Hepato-Biliary-Pancreatic Sciences      | 1 |
| Journal of Infection                               | 1 |
| Journal of Nanoscience and Nanotechnology          | 1 |
| Journal of Occupational and Environmental Medicine | 1 |
| Journal of Parenteral and Enteral Nutrition        | 1 |
| Journal of Research in Medical Sciences            | 1 |
| Journal of Thoracic and Cardiovascular Surgery     | 1 |
| Journal of Thoracic Disease                        | 1 |
| Journal of Translational Medicine                  | 1 |
| Journal of Ultrasound in Medicine                  | 1 |
| Journal of Vascular and Interventional Radiology   | 1 |
| Journal of Virological Methods                     | 1 |
| Korean Journal of Radiology                        | 1 |
| Liver International.                               | 1 |
| Mediators of Inflammation                          | 1 |
| Medicinal Chemistry                                | 1 |



|                                                               |   |
|---------------------------------------------------------------|---|
| Metabolic Brain Disease                                       | 1 |
| Minerva Anestesiologica                                       | 1 |
| Molecular Carcinogenesis                                      | 1 |
| Molecular Genetics and Metabolism                             | 1 |
| Molecular Oncology                                            | 1 |
| Pakistan Journal of Medical Sciences                          | 1 |
| Pediatric Transplantation                                     | 1 |
| Pharmacology                                                  | 1 |
| Pharmazie                                                     | 1 |
| PLoS ONE [Electronic Resource]                                | 1 |
| Proteome Science                                              | 1 |
| Renal Failure                                                 | 1 |
| Respiratory Care                                              | 1 |
| Scandinavian Journal of Clinical and Laboratory Investigation | 1 |
| Surgical Practice                                             | 1 |
| Thrombosis Research                                           | 1 |
| Transplant International                                      | 1 |
| Tumori                                                        | 1 |
| Turkish Journal of Gastroenterology                           | 1 |

|                                    |   |
|------------------------------------|---|
| Ultrasound in Medicine and Biology | 1 |
| Viral Immunology                   | 1 |
| World Journal of Pediatrics        | 1 |
| Xenobiotica                        | 1 |
